# Supplementary material
Source: PubMed Central journal article supplement (PMC5312972)
Supplement: ja6b11348_si_001.pdf [file ja6b11348_si_001.pdf]

# Diversity of Secondary Structure in Catalytic Peptides with $\beta$ -Turn-Biased Sequences

Anthony J. Metrano, Nadia C. Abascal,  
Brandon Q. Mercado, Eric K. Paulson, Anna E. Hurtley, and Scott J. Miller\*

Department of Chemistry, Yale University, New Haven, CT 06520-8107, United States

\*E-mail: [scott.miller@yale.edu](mailto:scott.miller@yale.edu)

## Supporting Information

### Table of Contents

|                                                                  |      |
|------------------------------------------------------------------|------|
| I. General Information .....                                     | S2   |
| II. Solution Phase Peptide Synthesis and Characterization.....   | S4   |
| III. Crystallographic Information .....                          | S49  |
| IV. Analysis of X-Ray Crystal Structure Library .....            | S97  |
| V. Solution-Phase NMR Studies .....                              | S144 |
| VI. DFT Geometry Optimizations of X-Ray Crystal Structures ..... | S211 |
| VII. Catalyst-Substrate Titration Data .....                     | S238 |
| VIII. Atroposelective Bromination Data .....                     | S250 |
| IX. References .....                                             | S255 |

## I. General Information

Room temperature (rt) is defined as 21–23 °C. All reagents were purchased from commercial suppliers and used without further purification, unless otherwise noted. Methylene chloride (CH<sub>2</sub>Cl<sub>2</sub>) and toluene (PhMe) were obtained from a Seca Solvent System by GlassContour, in which the solvent was dried over alumina and dispensed under an atmosphere of argon. All other solvents were purchased from commercial suppliers and used without further purification.

Routine <sup>1</sup>H-NMR spectra were recorded on Agilent 500 and 600 MHz spectrometers at ambient temperature unless otherwise noted. NMR solvents, chloroform-*d*, benzene-*d*<sub>6</sub>, methanol-*d*<sub>4</sub>, acetone-*d*<sub>6</sub>, and dimethylsulfoxide-*d*<sub>6</sub>, were purchased from Cambridge Isotope Laboratories and used without further purification. *d*-Chloroform was stored at ambient temperature over 4 Å molecular sieves, and benzene-*d*<sub>6</sub>, methanol-*d*<sub>4</sub>, dimethylsulfoxide-*d*<sub>6</sub> ampules were used immediately after opening. Spectra were processed with MestReNova 10.0.2 using the automatic phasing and Bernstein (third order) polynomial baseline correction capabilities. Splitting was determined using the automatic multiplet analysis function with intervention as necessary. Spectral data are reported as follows: chemical shift (multiplicity [singlet (s), doublet (d), triplet (t), quartet (q), pentet (p), multiplet (m), doublet of doublets (dd), doublet of doublet of doublets (ddd), doublet of triplet of doublets (dtd), doublet of triplets (dt), triplet of doublets (td), etc.], coupling constant, integration). Chemical shifts are reported in ppm (δ), and coupling constants are reported in Hz. <sup>1</sup>H-Resonances are referenced to solvent residual peaks for CDCl<sub>3</sub> (7.26 ppm) and C<sub>6</sub>D<sub>6</sub> (7.16 ppm).<sup>1</sup> Routine <sup>13</sup>C-NMR spectra were recorded on Agilent 500 or 600 MHz spectrometers with protons fully decoupled. <sup>13</sup>C-Resonances are reported in ppm relative to solvent residual peaks for CDCl<sub>3</sub> (77.2 ppm) or C<sub>6</sub>D<sub>6</sub> (128.1 ppm).<sup>1</sup>

Samples for high-resolution liquid chromatography-mass spectrometry (HRMS) were submitted to the Mass Spectrometry Laboratory at the University of Illinois at Urbana-Champaign. Data were acquired on a Waters Synapt G2-Si instrument equipped with an ESI detector. For crude analysis, ultra-high-performance liquid chromatography-mass spectrometry (UPLC/MS) was performed on a Waters Acquity UPLC/MS instrument equipped with a reverse-phase BEH C18 column (1.7 μm particle size, 2.1 x 50 mm), a dual atmospheric pressure chemical ionization (API)/electrospray ionization (ESI) mass spectrometry detector, and a photodiode array detector.

Analytical thin-layer chromatography (TLC) was performed using 60 Å Silica Gel F<sub>254</sub> pre-coated plates (0.25 mm thickness). TLC plates were visualized by irradiation with a UV lamp. R<sub>f</sub> values are reported. Normal-phase flash chromatography was performed using a Biotage Isolera One purification system equipped with a 10, 25, or 50 g SNAP Ultra (HP Sphere, 25 μm silica) cartridge and an appropriate EtOAc/hexanes linear gradient in the mobile phase. Reverse-phase column chromatography was performed using a Biotage Isolera One purification system equipped with a 60 or 120 g SNAP-C18 column and an appropriate MeOH/H<sub>2</sub>O linear gradient in the mobile phase. Normal-phase high-performance liquid chromatography (HPLC)

was performed using an Agilent 1100 series instrument equipped with a diode array detector and columns (chiral supports) from Daicel Chemical Industries (Chiralcel OJ-H).

## II. Solution Phase Peptide Synthesis and Characterization

### A. General Remarks

The solution phase peptide synthesis of catalysts **3–33** was accomplished using the *N*-*tert*-butoxycarbonyl (Boc) protecting group strategy.<sup>2</sup> Boc-L-β-Dimethylaminoalanine (**S7**, Boc-Dmaa-OH) was synthesized according to a literature procedure.<sup>3</sup> All other amino acid residues and coupling reagents were purchased from commercial suppliers. Once synthesized, peptides were stored at 0 °C to prevent epimerization and other adverse side-reactivity. Yields are not optimized.

### B. Representative Synthesis of Dimethylamide-Containing Peptide 3

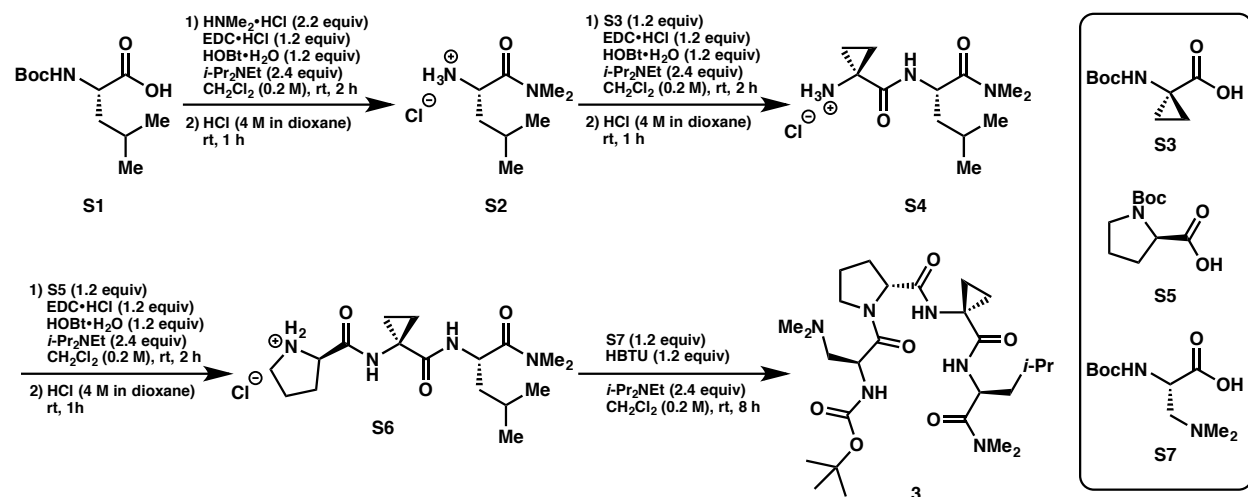

**Installation of Dimethyl Amide Cap:** Boc-Leu-OH·H<sub>2</sub>O (**S1**, 499 mg, 2.00 mmol), dimethylamine hydrochloride (359 mg, 4.40 mmol), and HOBt·H<sub>2</sub>O (368 mg, 2.40 mmol) were added to a round bottom flask equipped with a magnetic stir bar. The solid mixture was dissolved in CH<sub>2</sub>Cl<sub>2</sub> (10 mL, 0.2 M w.r.t. **S1**), and EDC·HCl (460 mg, 2.40 mmol) was added. The resulting solution was allowed to stir at rt as *i*-Pr<sub>2</sub>NEt (0.84 mL, 4.80 mmol) was added slowly, causing the cloudy solution to clarify. The pale yellow reaction solution was allowed to stir at rt for about 2 h, after which the solution was poured into a separatory funnel, diluted to 30 mL with additional CH<sub>2</sub>Cl<sub>2</sub>, and washed with approximately 25 mL of 10% aqueous (w/v) citric acid. The organic layer was separated and subsequently washed with 25 mL each of saturated aqueous NaHCO<sub>3</sub> and brine. The organics were dried over anhydrous Na<sub>2</sub>SO<sub>4</sub>, filtered, and concentrated *in vacuo* to provide a clear, pale yellow oil (517 mg, > 99% crude yield). The identity of Boc-Leu-NMe<sub>2</sub> was confirmed by UPLC/MS. **MS:** Exact mass calculated for [C<sub>13</sub>H<sub>26</sub>N<sub>2</sub>O<sub>3</sub> + H]<sup>+</sup> requires *m/z* = 259.2. Found 259.2 (ESI+).

**Deprotection 1:** Crude Boc-Leu-NMe<sub>2</sub> was then treated with 6 mL of 4.0 M HCl in 1,4-dioxane to cleave the Boc group. The resulting pale yellow solution was allowed to stir at rt for 1 h before HCl and 1,4-dioxane were removed *in vacuo*. Residual 1,4-dioxane was removed by co-

evaporation with CH<sub>2</sub>Cl<sub>2</sub> to provide 389 mg (> 99% crude yield) of **S2** as a foam, which was dried thoroughly under reduced pressure before being carried forward to the next coupling step.

**Peptide Coupling 1:** To a flask containing H-Leu-NMe<sub>2</sub>•HCl (**S2**, 389 mg, 2.00 mmol) was added Boc-Acpc-OH (**S3**, 483 mg, 2.20 mmol), HOBt•H<sub>2</sub>O (368 mg, 2.40 mmol), and a magnetic stir bar. The solid mixture was dissolved in dry CH<sub>2</sub>Cl<sub>2</sub> (10 mL, 0.2 M w.r.t. **S2**), and EDC•HCl (460 mg, 2.40 mmol) was then added. The resulting solution was allowed to stir at rt as *i*-Pr<sub>2</sub>NEt (0.84 mL, 4.8 mmol) was added slowly. The deep yellow reaction solution was allowed to stir at rt for 2 h, after which the solution was poured into a separatory funnel, diluted to 30 mL with additional CH<sub>2</sub>Cl<sub>2</sub>, and washed with 25 mL of 10% aqueous (w/v) citric acid. The organic layer was separated and subsequently washed with 25 mL each of saturated aqueous NaHCO<sub>3</sub> and brine. The organics were dried over anhydrous Na<sub>2</sub>SO<sub>4</sub>, filtered, and concentrated *in vacuo* to provide a white foam (739 mg, > 99% crude yield). The identity of Boc-Acpc-Leu-NMe<sub>2</sub> was confirmed by UPLC-MS. **MS:** Exact mass calculated for [C<sub>17</sub>H<sub>31</sub>N<sub>3</sub>O<sub>4</sub> + H]<sup>+</sup> requires *m/z* = 342.2. Found 342.3 (ESI+).

**Deprotection 2:** Deprotection of the crude dipeptide Boc-Acpc-Leu-NMe<sub>2</sub> was accomplished in the same manner as described in Deprotection 1 (*vide supra*) to provide **S4** (556 mg, 2.00 mmol) as a white foam.

**Peptide Coupling 2:** To a flask containing H-Acpc-Leu-NMe<sub>2</sub>•HCl (**S4**, 556 mg, 2.00 mmol) was added Boc-D-Pro-OH (**S3**, 517 mg, 2.20 mmol), HOBt•H<sub>2</sub>O (368 mg, 2.40 mmol), and a magnetic stir bar. The solid mixture was dissolved in dry CH<sub>2</sub>Cl<sub>2</sub> (10 mL, 0.2 M w.r.t. **S4**), and EDC•HCl (460 mg, 2.4 mmol) was then added. The resulting solution was allowed to stir at rt as *i*-Pr<sub>2</sub>NEt (0.84 mL, 4.8 mmol) was added slowly. The deep yellow reaction solution was allowed to stir at rt for 2 h, after which the solution was poured into a separatory funnel, diluted to 30 mL with additional CH<sub>2</sub>Cl<sub>2</sub>, and washed with 25 mL of 10% aqueous (w/v) citric acid. The organic layer was separated and subsequently washed with 25 mL each of saturated aqueous NaHCO<sub>3</sub> and brine. The organics were dried over anhydrous Na<sub>2</sub>SO<sub>4</sub>, filtered, and concentrated *in vacuo* to provide a white foam (873 mg, > 99% crude yield). The identity of Boc-D-Pro-Acpc-Leu-NMe<sub>2</sub> was confirmed by UPLC-MS. **MS:** Exact mass calculated for [C<sub>22</sub>H<sub>38</sub>N<sub>4</sub>O<sub>5</sub> + H]<sup>+</sup> requires *m/z* = 439.3. Found 439.4 (ESI+).

**Deprotection 3:** Deprotection of the crude tripeptide Boc-D-Pro-Acpc-Leu-NMe<sub>2</sub> was accomplished in the same manner as described in Deprotection 1 (*vide supra*) to provide **S6** (750 mg, 2.0 mmol) as an off-white foam.

**Peptide Coupling 3:** To a flask containing H-D-Pro-Acpc-Leu-NMe<sub>2</sub>•HCl (**S6**, 750 mg, 2.0 mmol) was added Boc-Dmaa-OH (**S7**, 511 mg, 2.20 mmol) and a magnetic stir bar. The solid mixture was dissolved in CH<sub>2</sub>Cl<sub>2</sub> (10 mL, 0.2 M w.r.t. **S6**), and HBTU (910 mg, 2.4 mmol) was then added to the stirring solution at rt. Next, *i*-Pr<sub>2</sub>NEt (0.84 mL, 4.8 mmol) was added slowly. The deep yellow/brown reaction solution was allowed to stir at rt for 8 h, after which the solution was poured into a separatory funnel, diluted to 30 mL with additional CH<sub>2</sub>Cl<sub>2</sub>, and washed twice with about 25 mL of saturated aqueous NaHCO<sub>3</sub>. The organic layer was separated and

subsequently washed with 20 mL of brine. The organics were dried over anhydrous Na<sub>2</sub>SO<sub>4</sub>, filtered, and concentrated *in vacuo* to provide a deep yellow oil. The crude product was loaded onto a Biotage Isolera One purification system for reverse-phase column chromatography (120 g column, 30-100% MeOH/H<sub>2</sub>O over 16 column volumes with 3 column volume pre- and post-run equilibrations, 45 mLmin<sup>-1</sup> flow, collection λ = 210 nm, monitored λ = 254 nm, 16 x 150 mm test tubes with 20 mL fractions). Fractions were pooled, concentrated *in vacuo*, and dried thrice azeotropically with CH<sub>2</sub>Cl<sub>2</sub> to provide Boc-Dmaa-D-Pro-Acpc-Leu-NMe<sub>2</sub> (**3**, 667 mg, 60% yield) as a white foam.

### C. Representative Synthesis of Methyl Ester-Containing Peptide 4

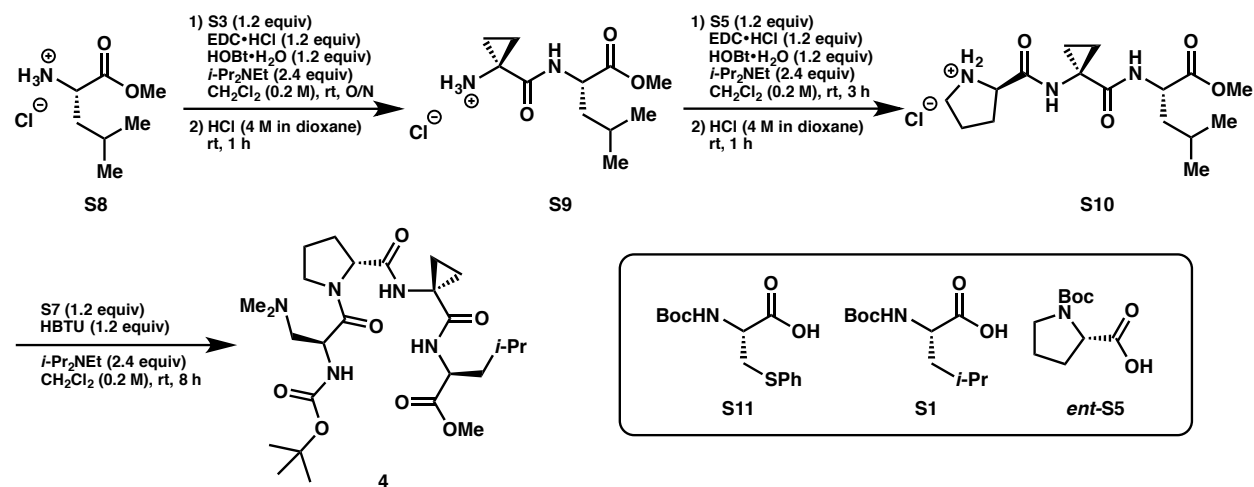

**Peptide Coupling 1:** To a flask containing H-Leu-OMe·HCl (**S8**, 362 mg, 2.00 mmol) was added Boc-Acpc-OH (**S3**, 483 mg, 2.40 mmol), HOBt·H<sub>2</sub>O (368 mg, 2.40 mmol), and a magnetic stir bar. The solid mixture was dissolved in dry CH<sub>2</sub>Cl<sub>2</sub> (10 mL, 0.2 M w.r.t. **S8**), and EDC·HCl (460 mg, 2.4 mmol) was then added. The resulting solution was allowed to stir at rt as *i*-Pr<sub>2</sub>NEt (0.84 mL, 4.8 mmol) was added slowly. The clear, colorless reaction solution was allowed to stir at rt for overnight, after which the solution was poured into a separatory funnel, diluted to 30 mL with additional CH<sub>2</sub>Cl<sub>2</sub>, and washed with 25 mL of 10% aqueous (w/v) citric acid. The organic layer was separated and subsequently washed with 25 mL each of saturated aqueous NaHCO<sub>3</sub> and brine. The organics were dried over anhydrous Na<sub>2</sub>SO<sub>4</sub>, filtered, and concentrated *in vacuo* to provide an off-white waxy solid (772 mg, > 99% crude yield). The identity of Boc-Acpc-Leu-OMe was confirmed by UPLC-MS. **MS:** Exact mass calculated for [C<sub>16</sub>H<sub>28</sub>N<sub>2</sub>O<sub>5</sub> + H]<sup>+</sup> requires *m/z* = 329.2. Found 329.3 (ESI+).

**Deprotection 1:** Crude Boc-Acpc-Leu-OMe was then treated with 6 mL of 4.0 M HCl in 1,4-dioxane to cleave the Boc group. The resulting pale yellow solution was allowed to stir at rt for 1 h, before HCl and 1,4-dioxane were removed *in vacuo*. Residual 1,4-dioxane was removed by co-evaporation with CH<sub>2</sub>Cl<sub>2</sub> to provide 530 mg (> 99% crude yield) of **S9** as a white foam, which was dried thoroughly under reduced pressure before being carried forward to the next coupling step.

**Peptide Coupling 2:** To a flask containing H-Acpc-Leu-OMe•HCl (**S9**, 530 mg, 2.0 mmol) was added Boc-D-Pro-OH (**S5**, 517 mg, 2.20 mmol), HOBt•H<sub>2</sub>O (368 mg, 2.40 mmol), and a magnetic stir bar. The solid mixture was dissolved in dry CH<sub>2</sub>Cl<sub>2</sub> (10.0 mL, 0.20 M w.r.t. **S9**), and EDC•HCl (460 mg, 2.40 mmol) was then added. The resulting solution was allowed to stir at rt as *i*-Pr<sub>2</sub>NEt (0.84 mL, 4.80 mmol) was added slowly. The clear, pale yellow reaction solution was allowed to stir at rt for 3 h, after which the solution was poured into a separatory funnel, diluted to 30 mL with additional CH<sub>2</sub>Cl<sub>2</sub>, and washed with 25 mL of 10% aqueous (w/v) citric acid. The organic layer was separated and subsequently washed with 25 mL each of saturated aqueous NaHCO<sub>3</sub> and brine. The organics were dried over anhydrous Na<sub>2</sub>SO<sub>4</sub>, filtered, and concentrated *in vacuo* to provide a white foam (851 mg, 1.86 mmol, 93% crude yield). The identity of Boc-D-Pro-Acpc-Leu-OMe was confirmed by UPLC-MS. **MS:** Exact mass calculated for [C<sub>21</sub>H<sub>35</sub>N<sub>3</sub>O<sub>6</sub> + H]<sup>+</sup> requires *m/z* = 426.3. Found 426.4 (ESI+). **\*\*\*Note:** To access peptides **15**, **21**, and **30**, Boc-Pro-OH (**ent-S5**) was coupled to **S9** instead of **S5** using an otherwise identical procedure.

**Deprotection 2:** Deprotection of the crude tripeptide Boc-D-Pro-Acpc-Leu-OMe was accomplished in the same manner as described in Deprotection 1 (*vide supra*) to provide 672 mg of **S10** (1.86 mmol, > 99% crude yield) as an off-white foam.

**Peptide Coupling 3:** To a flask containing H-D-Pro-Acpc-Leu-OMe•HCl (**S10**, 672 mg, 1.86 mmol) was added Boc-Dmaa-OH (**S7**, 518 mg, 2.23 mmol) and a magnetic stir bar. The solid mixture was dissolved in CH<sub>2</sub>Cl<sub>2</sub> (9.3 mL, 0.20 M w.r.t. **S10**), and HBTU (846 mg, 2.23 mmol) was then added to the stirring solution at rt. Next, *i*-Pr<sub>2</sub>NEt (0.78 mL, 4.46 mmol) was added slowly. The deep yellow reaction solution was allowed to stir at rt for 8 h, after which the solution was poured into a separatory funnel, diluted to 30 mL with additional CH<sub>2</sub>Cl<sub>2</sub>, and washed twice with about 25 mL of saturated aqueous NaHCO<sub>3</sub>. The organic layer was separated and subsequently washed with 20 mL of brine. The organics were dried over anhydrous Na<sub>2</sub>SO<sub>4</sub>, filtered, and concentrated *in vacuo* to provide a deep yellow oil. The crude product was loaded onto a Biotage Isolera One purification system for reverse-phase column chromatography (120 g column, 30-100% MeOH/H<sub>2</sub>O over 16 column volumes with 3 column volume pre- and post-run equilibrations, 45 mLmin<sup>-1</sup> flow, collection λ = 210 nm, monitored λ = 254 nm, 16 x 150 mm test tubes with 20 mL fractions). Fractions were pooled, concentrated *in vacuo*, and dried thrice azeotropically with CH<sub>2</sub>Cl<sub>2</sub> to provide Boc-Dmaa-D-Pro-Acpc-Leu-OMe (**4I**, 759 mg, 76% yield) as a white foam. **\*\*\*Note:** To access peptides **5** and **23**, Boc-Cys(Ph)-OH (**S11**) was coupled to **S10** instead of **S7** using a procedure identical to Peptide Coupling 2 (EDC/HOBt instead of HBTU). To access peptide **6**, Boc-Leu-OH (**S1**) was coupled to **S10** instead of **S7** using an otherwise identical procedure.

## D. Characterization of Peptides

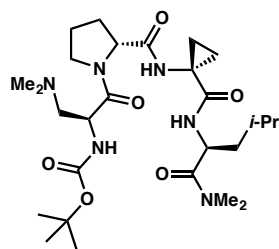

**Boc-Dmaa-D-Pro-Acpc-Leu-NMe<sub>2</sub> (3):** White foamy solid, 60% overall yield from **S1** using the dimethyl amide procedure.<sup>4</sup> **<sup>1</sup>H-NMR** (500 MHz, CDCl<sub>3</sub>): δ 7.55 (d, *J* = 8.5 Hz, 1H), 7.16 (s, 1H), 6.48 (d, *J* = 6.3 Hz, 1H), 4.92 (td, *J* = 8.6, 5.1 Hz, 1H), 4.39 (q, *J* = 7.1 Hz, 1H), 4.36 (dd, *J* = 7.6, 4.1 Hz, 1H), 4.03–3.91 (m, 1H), 3.60 (dt, *J* = 9.9, 6.8 Hz, 1H), 3.10 (s, 3H), 2.91 (s, 3H), 2.72 (dd, *J* = 12.3, 7.6 Hz, 1H), 2.46 (dd, *J* = 12.3, 7.2 Hz, 1H), 2.26 (s, 6H), 2.16–2.10 (m, 3H), 1.99–1.90 (m, 1H), 1.73–1.61 (m, 2H), 1.55–1.46 (m, 3H), 1.40 (s, 9H), 0.97 (dq, *J* = 6.3, 3.2 Hz, 2H), 0.92 (dd, *J* = 9.4, 6.4 Hz, 6H). **<sup>13</sup>C-NMR** (126 MHz, CDCl<sub>3</sub>): δ 172.5, 172.3, 171.5, 171.1, 156.5, 79.9, 76.9, 61.3, 60.1, 50.6, 47.7, 47.5, 45.9, 41.8, 37.3, 36.0, 34.6, 28.9, 28.5, 25.1, 24.7, 23.4, 22.4, 17.2, 17.1. **HRMS:** Exact mass calculated for [C<sub>27</sub>H<sub>48</sub>N<sub>6</sub>O<sub>6</sub> + H]<sup>+</sup> requires *m/z* = 553.3714. Found 553.3709 (ESI+).

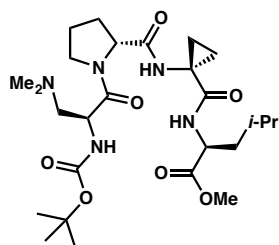

**Boc-Dmaa-D-Pro-Acpc-Leu-OMe (4):** White foamy solid, 76% overall yield from **S8** using the methyl ester procedure.<sup>5</sup> **<sup>1</sup>H-NMR** (500 MHz, CDCl<sub>3</sub>): δ 7.64 (s, 1H), 7.40 (d, *J* = 7.7 Hz, 1H), 5.78 (s, 1H), 4.48 (ddd, *J* = 9.0, 7.6, 5.3 Hz, 1H), 4.40 (dd, *J* = 8.5, 4.3 Hz, 1H), 4.34–4.22 (m, 1H), 4.00 (dt, *J* = 9.9, 6.3 Hz, 1H), 3.68 (s, 3H), 3.58 (dt, *J* = 9.7, 7.5 Hz, 1H), 2.67 (t, *J* = 11.1 Hz, 1H), 2.48–2.35 (m, 1H), 2.28 (s, 6H), 2.18 (dq, *J* = 12.9, 8.2 Hz, 1H), 2.13–2.02 (m, 1H), 2.02–1.89 (m, 2H), 1.71 (ddt, *J* = 13.8, 6.7, 5.0 Hz, 3H), 1.60 (tt, *J* = 9.9, 5.3 Hz, 1H), 1.41 (s, 9H), 1.31–1.27 (m, 1H), 1.02–0.93 (m, 2H), 0.90 (dd, *J* = 9.6, 6.2 Hz, 6H). **<sup>13</sup>C-NMR** (126 MHz, CDCl<sub>3</sub>): δ 173.5, 172.3, 171.5, 171.2, 156.7, 80.7, 61.7, 59.4, 51.9, 51.6, 50.8, 47.9, 45.7, 41.3, 34.6, 29.5, 28.5, 28.4, 24.8, 24.8, 23.0, 22.0, 17.1, 16.8. **HRMS:** Exact mass calculated for [C<sub>26</sub>H<sub>45</sub>N<sub>5</sub>O<sub>7</sub> + H]<sup>+</sup> requires *m/z* = 540.3397. Found 540.3394 (ESI+).

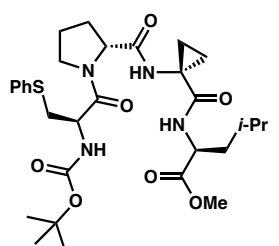

**Boc-Cys(Ph)-D-Pro-Acpc-Leu-OMe (5):** Pale yellow powder, 84% overall yield from **S8** using the methyl ester procedure. **<sup>1</sup>H-NMR** (500 MHz, CDCl<sub>3</sub>): δ 7.50 (d, *J* = 8.2 Hz, 1H), 7.39 (d, *J* = 7.6 Hz, 2H), 7.31 (t, *J* = 7.6 Hz, 2H), 7.22 (t, *J* = 7.3 Hz, 1H), 6.97 (bs, 1H), 5.80 (d, *J* = 6.4 Hz, 1H), 4.59 (dt, *J* = 14.1, 7.0 Hz, 1H), 4.45 (q, *J* = 6.7 Hz, 1H), 4.18 (dd, *J* = 8.2, 4.6 Hz, 1H), 3.82–3.73 (m, 1H), 3.69 (s, 2H), 3.51–3.42 (m, 1H), 3.30 (dd, *J* = 13.7, 8.1 Hz, 1H), 3.17 (dd, *J* = 13.7, 6.3 Hz, 1H), 2.13–2.03 (m, 1H), 2.03–1.92 (m, 2H), 1.92–1.81 (m, 1H), 1.78–1.68 (m, 2H), 1.68–1.57 (m, 2H), 1.50–1.35 (m, 10H), 1.00–0.86 (m, 9H). **<sup>13</sup>C-NMR** (151 MHz, CDCl<sub>3</sub>): δ 174.0, 172.3, 171.4, 170.9, 156.1, 134.9, 129.5, 129.3, 126.9, 80.7, 61.6, 52.2, 52.1, 51.3, 47.8, 41.3, 35.1, 34.6, 29.2, 28.4, 25.0, 24.8, 23.1, 22.0, 17.3, 17.2. **HRMS:** Exact mass calculated for [C<sub>30</sub>H<sub>44</sub>N<sub>4</sub>O<sub>7</sub>S + H]<sup>+</sup> requires *m/z* = 605.3009. Found 605.3007 (ESI+).



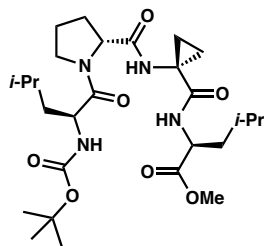

**Boc-Leu-D-Pro-Acpc-Leu-OMe (6):** White powder, 44% overall yield from **S8** using the methyl ester procedure.  $^1\text{H-NMR}$  (500 MHz,  $\text{CDCl}_3$ ):  $\delta$  7.46 (d,  $J = 7.9$  Hz, 1H), 7.30 (bs, 1H), 5.28 (bd,  $J = 6.0$  Hz, 1H), 4.52 (ddd,  $J = 9.2, 7.7, 5.3$  Hz, 1H), 4.41 (dd,  $J = 8.5, 4.3$  Hz, 1H), 4.28 (dt,  $J = 8.5, 5.6$  Hz, 1H), 4.03 (dt,  $J = 9.7, 6.3$  Hz, 1H), 3.69 (s, 3H), 3.55 (dt,  $J = 9.8, 7.4$  Hz, 1H), 2.20 (dq,  $J = 12.9, 8.2$  Hz, 1H), 2.14–2.05 (m, 1H), 2.04–1.96 (m, 2H), 1.78–1.65 (m, 4H), 1.65–1.46 (m, 3H), 1.46–1.43 (m, 1H), 1.42 (s, 9H), 1.36 (dd,  $J = 10.2, 4.2$  Hz, 1H), 1.02–0.93 (m, 7H), 0.92 (dd,  $J = 10.1, 6.3$  Hz, 6H).  $^{13}\text{C-NMR}$  (151 MHz,  $\text{CDCl}_3$ ):  $\delta$  173.7, 172.7, 171.7, 156.9, 110.2, 80.8, 61.5, 52.1, 51.6, 51.2, 47.7, 41.1, 40.4, 34.7, 29.4, 28.4, 24.9, 24.8, 24.8, 23.4, 23.0, 22.2, 21.9, 17.6, 17.1. **HRMS:** Exact mass calculated for  $[\text{C}_{27}\text{H}_{46}\text{N}_4\text{O}_7 + \text{H}]^+$  requires  $m/z = 539.3445$ . Found 539.3446 (ESI+).

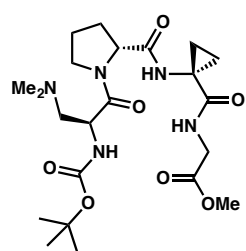

**Boc-Dmaa-D-Pro-Acpc-Gly-OMe (7):** White, foamy solid, 44% overall yield from **S8** using the methyl ester procedure.<sup>4,5</sup>  $^1\text{H-NMR}$  (500 MHz,  $\text{CDCl}_3$ ):  $\delta$  7.73 (s, 1H), 7.52 (t,  $J = 5.7$  Hz, 1H), 5.69 (s, 1H), 4.49 (t,  $J = 6.3$  Hz, 1H), 4.32–4.23 (m, 1H), 4.07–3.93 (m, 3H), 3.71 (s, 3H), 3.57 (q,  $J = 8.2$  Hz, 1H), 2.67 (t,  $J = 11.0$  Hz, 1H), 2.37 (dd,  $J = 12.5, 4.9$  Hz, 1H), 2.27 (s, 6H), 2.20–2.10 (m, 2H), 1.99 (p,  $J = 7.0$  Hz, 2H), 1.75–1.67 (m, 1H), 1.40 (s, 9H), 1.37–1.29 (m, 1H), 1.06–0.93 (m, 2H).  $^{13}\text{C-NMR}$  (126 MHz,  $\text{CDCl}_3$ ):  $\delta$  172.1, 172.0, 171.4, 170.1, 156.5, 110.0, 80.6, 61.4, 58.9, 52.0, 50.7, 47.7, 45.4, 41.8, 34.5, 29.2, 28.2, 24.6, 17.0, 16.7. **HRMS:** Exact mass calculated for  $[\text{C}_{22}\text{H}_{37}\text{N}_5\text{O}_7 + \text{H}]^+$  requires  $m/z = 484.2771$ . Found 484.2768 (ESI+).

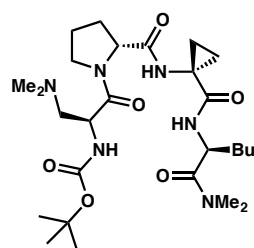

**Boc-Dmaa-D-Pro-Acpc-Nle-NMe<sub>2</sub> (8):** White solid, 53% overall yield from **S1** using the dimethyl amide procedure.<sup>4</sup>  $^1\text{H-NMR}$  (500 MHz,  $\text{CDCl}_3$ ):  $\delta$  7.55 (d,  $J = 8.3$  Hz, 1H), 7.21 (s, 1H), 6.45 (d,  $J = 6.2$  Hz, 1H), 4.84 (td,  $J = 7.9, 6.2$  Hz, 1H), 4.43–4.29 (m, 2H), 3.91 (dt,  $J = 10.5, 5.7$  Hz, 1H), 3.60 (dt,  $J = 9.9, 6.9$  Hz, 1H), 3.08 (s, 3H), 2.92 (s, 3H), 2.71 (dd,  $J = 12.3, 7.3$  Hz, 1H), 2.47 (dd,  $J = 12.3, 7.4$  Hz, 1H), 2.26 (s, 6H), 2.18–2.12 (m, 1H), 2.11–2.00 (m, 2H), 1.99–1.90 (m, 1H), 1.83–1.72 (m, 1H), 1.72–1.63 (m, 1H), 1.54–1.46 (m, 2H), 1.39 (s, 9H), 1.35–1.20 (m, 4H), 1.04–0.91 (m, 2H), 0.89–0.82 (m, 3H).  $^{13}\text{C-NMR}$  (126 MHz,  $\text{CDCl}_3$ ):  $\delta$  172.4, 172.0, 171.5, 171.0, 156.5, 79.9, 61.3, 60.1, 50.7, 49.3, 47.5, 45.9, 37.4, 35.9, 34.6, 32.5, 28.8, 28.5, 27.7, 25.1, 22.7, 17.3, 17.0, 14.1. **HRMS:** Exact mass calculated for  $[\text{C}_{27}\text{H}_{48}\text{N}_6\text{O}_6 + \text{H}]^+$  requires  $m/z = 553.3714$ . Found 553.3707 (ESI+).

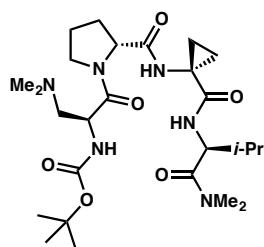

**Boc-Dmaa-D-Pro-Acpc-Val-NMe<sub>2</sub> (9):** White solid, 54% overall yield from **S1** using the dimethyl amide procedure.<sup>4,5</sup>  $^1\text{H-NMR}$  (500 MHz,  $\text{CDCl}_3$ ):  $\delta$  7.45 (d,  $J = 8.7$  Hz, 1H), 7.28 (s, 1H), 6.40 (bs, 1H), 4.62 (t,  $J = 8.5$  Hz, 1H), 4.40 (dd,  $J = 7.6, 4.5$  Hz, 1H), 4.36 (q,  $J = 7.0$  Hz, 1H), 3.97–3.87 (m, 1H), 3.59 (dt,  $J = 10.0, 6.9$  Hz, 1H), 3.12 (s, 3H), 2.92 (s, 3H), 2.73–2.59 (m, 1H), 2.52 (dd,  $J = 12.4, 7.8$  Hz, 1H), 2.26 (s, 6H), 2.22–2.13 (m, 1H), 2.13–2.02 (m, 3H), 2.01–1.87 (m, 1H), 1.55 (dt,  $J = 10.1, 3.5$  Hz, 1H), 1.48–1.40 (m, 1H), 1.38 (s, 9H), 1.01–0.93 (m, 5H), 0.89 (d,  $J = 6.7$  Hz, 3H).  $^{13}\text{C-NMR}$  (126

MHz, CDCl<sub>3</sub>):  $\delta$  172.4, 171.8, 171.6, 171.4, 156.6, 79.9, 61.4, 59.9, 54.7, 50.7, 47.5, 45.9, 37.6, 35.8, 34.6, 31.3, 28.9, 28.4, 25.0, 19.5, 18.7, 17.4, 17.0. **HRMS**: Exact mass calculated for [C<sub>26</sub>H<sub>46</sub>N<sub>6</sub>O<sub>6</sub> + H]<sup>+</sup> requires  $m/z$  = 539.3557. Found 539.3555 (ESI+).

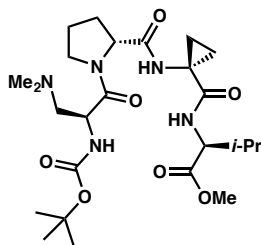

**Boc-Dmaa-D-Pro-Acpc-Val-OMe (10)**: White solid, 56% overall yield from **S8** using the methyl ester procedure.<sup>5</sup> **<sup>1</sup>H-NMR** (500 MHz, CDCl<sub>3</sub>):  $\delta$  7.12–6.95 (m, 2H), 5.77 (s, 1H), 4.52–4.42 (m, 2H), 4.39 (td,  $J$  = 7.2, 5.3 Hz, 1H), 3.98–3.81 (m, 1H), 3.69 (s, 3H), 3.61–3.47 (m, 1H), 2.59 (d,  $J$  = 6.9 Hz, 1H), 2.34–2.22 (m, 6H), 2.21–2.11 (m, 1H), 2.11–2.03 (m, 1H), 2.03–1.92 (m, 2H), 1.50 (d,  $J$  = 7.3 Hz, 6H), 1.41 (s, 9H), 0.93 (dd,  $J$  = 6.9, 4.6 Hz, 6H). **<sup>13</sup>C-NMR** (126 MHz, CDCl<sub>3</sub>):  $\delta$  174.4, 172.8, 171.2, 170.7, 155.9, 110.2, 80.0, 61.4, 59.8, 57.6, 57.4, 51.9, 50.9, 47.6, 45.7, 31.4, 28.5, 25.8, 25.6, 24.9, 19.2, 18.2. **HRMS**: Exact mass calculated for [C<sub>25</sub>H<sub>43</sub>N<sub>5</sub>O<sub>7</sub> + H]<sup>+</sup> requires  $m/z$  = 526.3241. Found 526.3240 (ESI+).

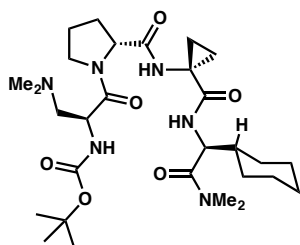

**Boc-Dmaa-D-Pro-Acpc-Chg-NMe<sub>2</sub> (11)**: White solid, 61% overall yield from **S1** using the dimethyl amide procedure.<sup>4</sup> **<sup>1</sup>H-NMR** (500 MHz, CDCl<sub>3</sub>):  $\delta$  7.48 (d,  $J$  = 8.7 Hz, 1H), 7.18 (s, 1H), 6.56 (d,  $J$  = 6.5 Hz, 1H), 4.66 (t,  $J$  = 8.5 Hz, 1H), 4.50–4.29 (m, 2H), 3.88 (dt,  $J$  = 10.8, 6.0 Hz, 1H), 3.59 (dt,  $J$  = 9.8, 6.6 Hz, 1H), 3.10 (s, 3H), 2.91 (s, 3H), 2.85–2.63 (m, 1H), 2.44 (dd,  $J$  = 12.3, 7.1 Hz, 1H), 2.25 (s, 6H), 2.22–1.98 (m, 3H), 1.98–1.89 (m, 1H), 1.90–1.75 (m, 2H), 1.76–1.56 (m, 4H), 1.54–1.43 (m, 2H), 1.38 (s, 9H), 1.33–1.04 (m, 3H), 1.04–0.81 (m, 4H). **<sup>13</sup>C-NMR** (126 MHz, CDCl<sub>3</sub>):  $\delta$  172.4, 171.7, 171.4, 171.3, 156.5, 79.8, 61.2, 60.0, 53.9, 50.6, 47.4, 45.9, 40.6, 37.7, 35.8, 34.6, 29.8, 28.8, 28.8, 28.4, 26.4, 26.2, 26.1, 25.1, 17.4, 17.0. **HRMS**: Exact mass calculated for [C<sub>29</sub>H<sub>50</sub>N<sub>6</sub>O<sub>6</sub> + H]<sup>+</sup> requires  $m/z$  = 579.3870. Found 579.3860 (ESI+).

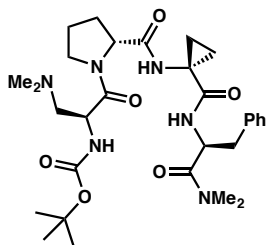

**Boc-Dmaa-D-Pro-Acpc-Phe-NMe<sub>2</sub> (12)**: White, foamy solid, 30% overall yield from **S1** using the dimethyl amide procedure.<sup>4-6</sup> **<sup>1</sup>H-NMR** (500 MHz, CDCl<sub>3</sub>):  $\delta$  7.69 (d,  $J$  = 8.2 Hz, 1H), 7.37 (s, 1H), 7.27–7.14 (m, 5H), 6.52 (d,  $J$  = 6.0 Hz, 1H), 5.03 (ddd,  $J$  = 9.3, 8.2, 5.8 Hz, 1H), 4.46–4.38 (m, 2H), 3.92 (dd,  $J$  = 8.1, 6.6 Hz, 1H), 3.61 (dt,  $J$  = 9.7, 7.0 Hz, 1H), 3.11 (dd,  $J$  = 13.0, 9.4 Hz, 1H), 3.02 (dd,  $J$  = 13.0, 5.8 Hz, 1H), 2.77 (s, 3H), 2.73 (dd,  $J$  = 12.8 Hz, 1H), 2.62 (s, 3H), 2.60–2.49 (m, 1H), 2.29 (s, 6H), 2.17–2.08 (m, 2H), 2.08–2.00 (m, 1H), 2.00–1.91 (m, 1H), 1.53–1.43 (m, 2H), 1.39 (s, 9H), 1.04–0.95 (m, 1H), 0.97–0.91 (m, 1H). **<sup>13</sup>C-NMR** (126 MHz, CDCl<sub>3</sub>):  $\delta$  172.6, 171.7, 171.4, 171.0, 156.6, 137.1, 129.5, 128.4, 126.8, 80.0, 61.4, 59.9, 50.8, 50.7, 47.6, 45.9, 39.2, 37.0, 35.7, 34.6, 28.9, 28.4, 25.0, 17.3, 17.2. **HRMS**: Exact mass calculated for [C<sub>30</sub>H<sub>46</sub>N<sub>6</sub>O<sub>6</sub> + H]<sup>+</sup> requires  $m/z$  = 587.3557. Found 587.3551 (ESI+).

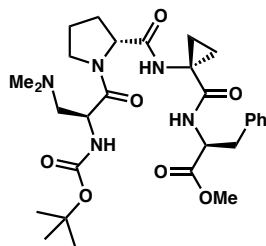

**Boc-Dmaa-D-Pro-Acpc-Phe-OMe (13):** White foamy solid, 7% overall yield from **S8** using the methyl ester procedure.<sup>5</sup> **<sup>1</sup>H-NMR** (600 MHz, CDCl<sub>3</sub>): δ 7.61 (s, 1H), 7.51 (d, *J* = 7.5 Hz, 1H), 7.30–7.22 (m, 3H), 7.22–7.15 (m, 2H), 5.73 (s, 1H), 4.70 (q, *J* = 7.2 Hz, 1H), 4.43 (t, *J* = 6.2 Hz, 1H), 4.31–4.25 (m, 1H), 4.03–3.95 (m, 1H), 3.61 (s, 3H), 3.56 (q, *J* = 8.2 Hz, 1H), 3.15–3.07 (m, 2H), 2.66 (t, *J* = 11.1 Hz, 1H), 2.45–2.36 (m, 1H), 2.28 (s, 6H), 2.19–2.11 (m, 2H), 2.01–1.91 (m, 2H), 1.69–1.57 (m, 1H), 1.42 (s, 9H), 1.37–1.30 (m, 1H), 1.01–0.95 (m, 2H). **<sup>13</sup>C-NMR** (151 MHz, CDCl<sub>3</sub>): δ 172.2, 172.2, 171.5, 171.3, 156.7, 137.0, 129.6, 128.4, 126.7, 80.7, 61.6, 59.4, 54.7, 52.0, 50.7, 47.8, 45.7, 38.4, 34.6, 29.4, 28.4, 24.7, 17.3, 17.1. **HRMS:** Exact mass calculated for [C<sub>29</sub>H<sub>43</sub>N<sub>5</sub>O<sub>7</sub> + H]<sup>+</sup> requires *m/z* = 574.3241. Found 574.3235 (ESI+).

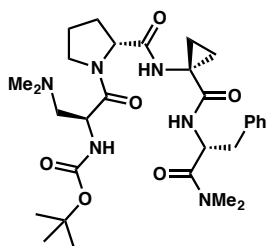

**Boc-Dmaa-D-Pro-Acpc-D-Phe-NMe<sub>2</sub> (14):** White, foamy solid, 56% overall yield from **S1** using the dimethyl amide procedure.<sup>4</sup> **<sup>1</sup>H-NMR** (500 MHz, CDCl<sub>3</sub>): δ 7.60 (d, *J* = 7.9 Hz, 1H), 7.50 (s, 1H), 7.24–7.23 (m, 4H), 7.18 (dq, *J* = 8.5, 3.8 Hz, 1H), 5.92 (d, *J* = 4.4 Hz, 1H), 4.98 (ddd, *J* = 9.4, 7.9, 4.7 Hz, 1H), 4.49–4.47 (m, 1H), 4.33 (dt, *J* = 9.5, 5.3 Hz, 1H), 4.11–3.81 (m, 1H), 3.56 (q, *J* = 8.1 Hz, 1H), 3.11 (dd, *J* = 13.0, 9.5 Hz, 1H), 2.93 (dd, *J* = 12.9, 4.6 Hz, 1H), 2.81 (s, 3H), 2.63 (dd, *J* = 12.4, 9.1 Hz, 1H), 2.59 (s, 3H), 2.47 (dd, *J* = 12.5, 5.9 Hz, 1H), 2.25 (s, 6H), 2.23–2.21 (m, 1H), 2.14–1.84 (m, 3H), 1.65–1.51 (m, 1H), 1.47–1.43 (m, 1H), 1.39 (s, 9H), 1.13–0.89 (m, 2H). **<sup>13</sup>C-NMR** (126 MHz, CDCl<sub>3</sub>): δ 172.3, 171.4, 171.1, 170.7, 156.4, 137.5, 129.8, 128.3, 126.6, 80.2, 61.3, 59.7, 51.4, 50.8, 47.6, 45.7, 39.5, 36.9, 35.7, 34.8, 29.0, 28.5, 24.9, 17.2. **HRMS:** Exact mass calculated for [C<sub>30</sub>H<sub>46</sub>N<sub>6</sub>O<sub>6</sub> + H]<sup>+</sup> requires *m/z* = 587.3557. Found 587.3549 (ESI+).

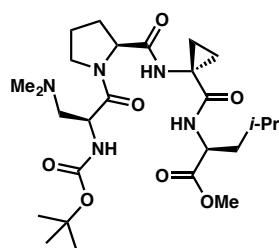

**Boc-Dmaa-Pro-Acpc-Leu-OMe (15):** White, foamy solid, 72% overall yield from **S8** using the methyl ester procedure.<sup>5</sup> **<sup>1</sup>H-NMR** (600 MHz, CDCl<sub>3</sub>): δ 7.94 (s, 1H), 7.38 (d, *J* = 8.1 Hz, 1H), 5.38–5.20 (m, 1H), 4.66 (q, *J* = 7.4 Hz, 1H), 4.59–4.42 (m, 2H), 3.92 (m, 1H), 3.70 (s, 3H), 3.66–3.55 (m, 1H), 2.91–2.54 (m, 2H), 2.34–2.31 (m, 7H), 1.94–1.99 (m, 3H), 1.76–1.62 (m, 3H), 1.42 (s, 11H), 1.00 (ddd, *J* = 10.1, 7.7, 4.8 Hz, 1H), 0.94 (dd, *J* = 10.9, 6.0 Hz, 6H), 0.82–1.79 (m, 1H). **<sup>13</sup>C-NMR** (151 MHz, CDCl<sub>3</sub>): δ 173.1, 172.0, 171.7, 155.3, 80.4, 62.2, 61.3, 52.3, 51.6, 50.7, 48.2, 46.7, 41.3, 34.6, 29.4, 28.5, 28.4, 25.3, 24.9, 23.0, 22.0, 17.5, 16.9. **HRMS:** Exact mass calculated for [C<sub>26</sub>H<sub>45</sub>N<sub>5</sub>O<sub>7</sub> + H]<sup>+</sup> requires *m/z* = 540.3397. Found 540.3387 (ESI+).

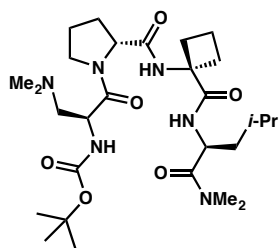

**Boc-Dmaa-D-Pro-Acpc-Leu-NMe<sub>2</sub> (16):** White solid, 39% overall yield from **S1** using the dimethyl amide procedure. **<sup>1</sup>H-NMR** (500 MHz, CDCl<sub>3</sub>): δ 7.24 (s, 1H), 7.15 (d, *J* = 8.8 Hz, 1H), 6.37 (s, 1H), 4.99 (td, *J* = 8.9, 5.0 Hz, 1H), 4.56–4.35 (m, 2H), 3.84 (brs, 1H), 3.58 (q, *J* = 8.0 Hz, 1H), 3.11 (s, 3H), 2.90 (s, 3H), 2.87–2.77 (m, 2H), 2.63–2.51 (m, 2H), 2.37 (s, 5H), 2.31–2.21 (m, 2H), 2.19–2.07 (m, 3H), 2.07–1.91 (m, 4H), 1.70–1.52 (m, 2H), 1.49 (d, *J* = 4.8 Hz, 1H), 1.41 (s, 9H), 0.93 (dd,

$J = 26.5, 6.4$  Hz, 6H).  $^{13}\text{C-NMR}$  (126 MHz,  $\text{CDCl}_3$ ):  $\delta$  172.9, 172.3, 170.9, 156.0, 79.8, 60.9, 59.8, 59.4, 50.6, 47.4, 47.1, 45.7, 42.1, 37.3, 35.9, 32.3, 31.1, 28.5, 28.3, 25.0, 24.8, 23.4, 22.3, 16.0. **HRMS**: Exact mass calculated for  $[\text{C}_{28}\text{H}_{50}\text{N}_6\text{O}_6 + \text{H}]^+$  requires  $m/z = 567.3870$ . Found 567.3859 (ESI+).

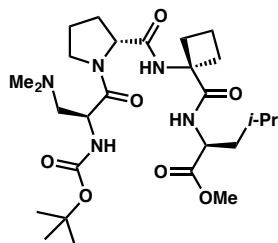

**Boc-Dmaa-D-Pro-Acbe-Leu-OMe (17)**: White solid, 70% overall yield from **S8** using the methyl ester procedure.  $^1\text{H-NMR}$  (600 MHz,  $\text{CDCl}_3$ ):  $\delta$  7.47 (s, 1H), 7.05 (d,  $J = 7.9$  Hz, 1H), 5.75 (brs, 1H), 4.56–4.49 (m, 1H), 4.47–4.42 (m, 1H), 4.32 (s, 1H), 3.97 (s, 1H), 3.67 (s, 3H), 3.56 (q,  $J = 8.2$  Hz, 1H), 2.86–2.77 (m, 1H), 2.67–2.58 (m, 1H), 2.37–2.18 (m, 9H), 2.15–1.87 (m, 7H), 1.72–1.53 (m, 3H), 1.39 (s, 9H), 0.90 (dd,  $J = 6.4, 1.2$  Hz, 6H).  $^{13}\text{C-NMR}$  (151 MHz,  $\text{CDCl}_3$ ):  $\delta$  173.5, 173.4, 170.8, 156.1, 80.3, 77.4, 77.2, 76.9, 61.1, 59.5, 59.3, 52.0, 51.0, 50.9, 47.7, 45.6, 41.3, 31.6, 31.5, 29.0, 28.6, 28.5, 24.8, 24.8, 23.0, 22.0, 15.9. **HRMS**: Exact mass calculated for  $[\text{C}_{27}\text{H}_{47}\text{N}_5\text{O}_7 + \text{H}]^+$  requires  $m/z = 554.3554$ . Found 554.3571 (ESI+).

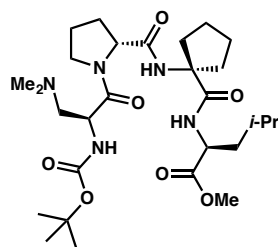

**Boc-Dmaa-D-Pro-Cle-Leu-OMe (18)**: White, foamy solid, 30% overall yield from **S8** using the methyl ester procedure.  $^1\text{H-NMR}$  (500 MHz,  $\text{CDCl}_3$ ):  $\delta$  7.16 (d,  $J = 8.1$  Hz, 1H), 7.00 (s, 1H), 5.79 (brs, 1H), 4.56 (td,  $J = 8.7, 5.4$  Hz, 1H), 4.40 (dd,  $J = 7.8, 3.7$  Hz, 2H), 3.91 (s, 1H), 3.67 (s, 3H), 3.60–3.54 (m, 1H), 2.63 (s, 2H), 2.41–2.17 (m, 9H), 2.08–1.88 (m, 5H), 1.85–1.71 (m, 2H), 1.71–1.55 (m, 5H), 1.42 (s, 9H), 0.91 (dd,  $J = 6.4, 1.5$  Hz, 6H).  $^{13}\text{C-NMR}$  (126 MHz,  $\text{CDCl}_3$ ):  $\delta$  186.1, 174.0, 173.8, 170.9, 156.0, 80.2, 67.2, 61.4, 52.0, 51.0, 50.9, 47.7, 45.7, 41.3, 37.3, 37.2, 28.7, 28.5, 24.9, 24.9, 24.8, 24.6, 23.1, 22.0. **HRMS**: Exact mass calculated for  $[\text{C}_{28}\text{H}_{49}\text{N}_5\text{O}_7 + \text{H}]^+$  requires  $m/z = 568.3710$ . Found 568.3697 (ESI+).

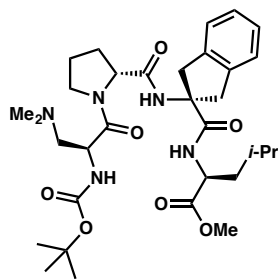

**Boc-Dmaa-D-Pro-Aic-Leu-OMe (19)**: White, foamy solid, 74% overall yield from **S8** using the methyl ester procedure.<sup>5</sup>  $^1\text{H-NMR}$  (500 MHz,  $\text{CDCl}_3$ ):  $\delta$  7.24–7.18 (m, 2H), 7.18–7.10 (m, 4H), 5.73 (brs, 1H), 4.72–4.49 (m, 1H), 4.35 (dd,  $J = 8.1, 3.8$  Hz, 1H), 4.30 (dt,  $J = 9.0, 5.2$  Hz, 1H), 3.81–3.73 (m, 2H), 3.69–3.63 (m, 4H), 3.50 (q,  $J = 7.8$  Hz, 1H), 3.43 (d,  $J = 16.8$  Hz, 1H), 3.26 (d,  $J = 16.7$  Hz, 1H), 2.64–2.46 (m, 2H), 2.29 (s, 6H), 2.19–2.07 (m, 1H), 2.05–1.94 (m, 1H), 1.94–1.83 (m, 2H), 1.79–1.57 (m, 3H), 1.47 (s, 9H), 0.93 (dd,  $J = 6.3, 2.7$  Hz, 6H).  $^{13}\text{C-NMR}$  (126 MHz,  $\text{CDCl}_3$ ):  $\delta$  173.6, 172.9, 171.3, 171.0, 156.0, 140.8, 140.5, 126.8, 126.7, 124.6, 80.2, 67.4, 61.3, 59.6, 52.0, 51.3, 51.0, 47.6, 45.6, 43.7, 43.6, 41.2, 28.7, 28.6, 24.9, 24.8, 23.1, 22.0. **HRMS**: Exact mass calculated for  $[\text{C}_{32}\text{H}_{49}\text{N}_5\text{O}_7 + \text{H}]^+$  requires  $m/z = 616.3710$ . Found 616.3706 (ESI+).

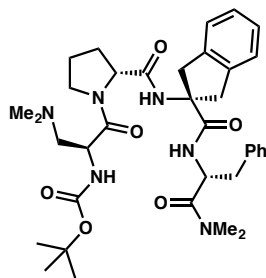

**Boc-Dmaa-D-Pro-Aic-D-Phe-NMe<sub>2</sub> (20):** White, foamy solid, 54% overall yield from **S1** using the dimethyl amide procedure.<sup>6</sup> **<sup>1</sup>H-NMR** (500 MHz, CDCl<sub>3</sub>): δ 7.53 (d, *J* = 8.1 Hz, 1H), 7.32 (s, 1H), 7.26–7.18 (m, 4H), 7.21–7.14 (m, 1H), 7.17–7.09 (m, 4H), 5.88 (d, *J* = 5.5 Hz, 1H), 5.02 (q, *J* = 7.6 Hz, 1H), 4.44–4.38 (m, 1H), 4.36 (q, *J* = 6.9 Hz, 1H), 3.84–3.75 (m, 1H), 3.68 (d, *J* = 16.7 Hz, 1H), 3.61 (d, *J* = 16.6 Hz, 1H), 3.52 (q, *J* = 7.9 Hz, 1H), 3.35 (d, *J* = 16.7 Hz, 1H), 3.28 (d, *J* = 16.6 Hz, 1H), 3.00–2.93 (m, 2H), 2.80 (s, 3H), 2.68 (m, 1H), 2.59 (s, 3H), 2.56–2.49 (m, 2H), 2.24 (s, 6H), 2.19–2.11 (m, 1H), 2.03–1.93 (m, 2H), 1.92–1.85 (m, 1H), 1.39 (s, 9H). **<sup>13</sup>C-NMR** (126 MHz, CDCl<sub>3</sub>): δ 172.7, 171.6, 171.3, 171.1, 156.0, 140.7, 140.0, 137.2, 129.6, 128.3, 126.8, 126.7, 126.7, 124.6, 124.4, 110.1, 80.0, 67.2, 61.0, 60.0, 51.1, 50.8, 47.5, 45.7, 44.2, 43.3, 39.2, 37.0, 35.8, 28.7, 28.4, 24.8. **HRMS:** Exact mass calculated for [C<sub>36</sub>H<sub>50</sub>N<sub>6</sub>O<sub>6</sub> + H]<sup>+</sup> requires *m/z* = 663.3870. Found 663.3885 (ESI+).

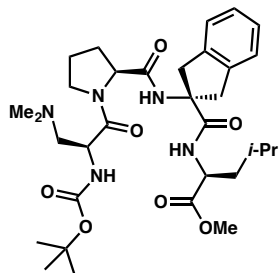

**Boc-Dmaa-Pro-Aic-Leu-OMe (21):** White, foamy solid, 75% overall yield from **S8** using the methyl ester procedure.<sup>5</sup> NMR Spectra show conformational isomerism (~20% minor conformer in CDCl<sub>3</sub>). **Major Rotamer (80%):** **<sup>1</sup>H-NMR** (500 MHz, CDCl<sub>3</sub>): δ 7.33 (d, *J* = 8.0 Hz, 1H), 7.22 (s, 1H), 7.18–7.07 (m, 4H), 5.31 (d, *J* = 6.8 Hz, 1H), 4.57–4.50 (m, 1H), 4.48–4.42 (m, 2H), 3.80–3.74 (m, 1H), 3.74 (d, *J* = 16.6 Hz, 1H), 3.69 (s, 3H), 3.61 (d, *J* = 16.5 Hz, 1H), 3.57–3.50 (m, 1H), 3.39 (d, *J* = 21.3 Hz, 1H), 3.26 (d, *J* = 16.5 Hz, 1H), 2.54–2.43 (m, 2H), 2.25 (s, 6H), 2.12–2.00 (m, 2H), 1.97–1.86 (m, 2H), 1.68–1.51 (m, 3H), 1.49–1.36 (s, 9H), 0.92 (dd, *J* = 8.2, 5.8 Hz, 6H). **<sup>13</sup>C-NMR** (126 MHz, CDCl<sub>3</sub>): δ 173.3, 173.0, 171.8, 171.4, 155.6, 140.7, 139.9, 127.0, 126.9, 124.7, 124.5, 80.1, 67.4, 61.4, 60.8, 52.1, 51.4, 47.8, 46.1, 43.8, 43.1, 41.2, 32.0, 28.4, 28.1, 25.2, 25.0, 23.0, 22.0. **Minor Rotamer (20%):** **<sup>1</sup>H-NMR** (500 MHz, CDCl<sub>3</sub>): δ 7.44 (s, 1H), 7.25–7.23 (m, 1H), 7.18–7.07 (m, 4H), 5.49 (d, *J* = 5.5 Hz, 1H), 4.65 (td, 8.9, *J* = 5.0 Hz, 1H), 4.58–4.50 (m, 1H), 4.49–4.41 (m, 1H), 3.98 (d, *J* = 16.8 Hz, 1H), 3.65 (s, 3H), 3.47–3.41 (m, 1H), 3.30 (d, *J* = 16.9 Hz, 1H), 3.26–3.22 (m, 1H), 3.23–3.18 (m, 1H), 2.58 (dd, *J* = 12.7, 8.9 Hz, 1H), 2.43–2.33 (m, 2H), 2.26 (s, 6H), 1.99–1.85 (m, 2H), 1.75 (dt, *J* = 13.8, 7.1 Hz, 1H), 1.69–1.57 (m, 2H), 1.54 (dd, 8.5, *J* = 5.0 Hz, 1H), 1.46 (s, 9H), 1.44–1.36 (m, 1H), 0.95–0.89 (m, 3H), 0.87 (d, *J* = 6.3, 3H). **<sup>13</sup>C-NMR** (126 MHz, CDCl<sub>3</sub>): δ 173.9, 172.3, 171.8, 171.0, 156.9, 141.5, 138.9, 127.2, 126.7, 124.7, 124.5, 80.5, 67.9, 61.1, 60.2, 52.1, 51.7, 50.7, 46.6, 45.9, 44.1, 42.4, 41.1, 32.0, 28.6, 25.0, 22.8, 22.2, 21.9. **HRMS:** Exact mass calculated for [C<sub>32</sub>H<sub>49</sub>N<sub>5</sub>O<sub>7</sub> + H]<sup>+</sup> requires *m/z* = 616.3710. Found 616.3702 (ESI+).

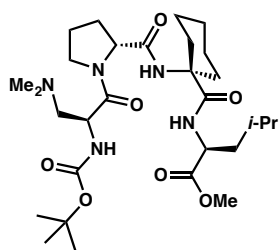

**Boc-Dmaa-D-Pro-Achc-Leu-OMe (22):** White, foamy solid, 25% overall yield from **S8** using the methyl ester procedure. **<sup>1</sup>H-NMR** (500 MHz, CDCl<sub>3</sub>): δ 7.10 (d, *J* = 8.2 Hz, 1H), 6.90 (s, 1H), 5.72 (brs, 1H), 4.57 (td, *J* = 8.7, 5.4 Hz, 1H), 4.51–4.37 (m, 2H), 4.03–3.89 (m, 1H), 3.66 (s, 3H), 3.62–3.51 (m, 1H), 2.58 (s, 2H), 2.30 (d, *J* = 15.1 Hz, 7H), 2.20–1.95 (m, 5H), 1.92–1.72 (m, 2H), 1.72–1.51 (m, 6H), 1.41 (s, 9H), 1.45–1.19 (m, 3H), 0.91 (d, *J* = 6.4 Hz, 6H). **<sup>13</sup>C-NMR** (126 MHz, CDCl<sub>3</sub>): δ 174.5,

173.9, 172.0, 170.5, 155.8, 80.0, 61.4, 60.3, 59.8, 52.0, 50.8, 50.7, 47.6, 45.7, 41.4, 32.0, 31.6, 28.5, 28.4, 25.3, 25.0, 24.9, 23.1, 21.9, 21.7, 21.6. **HRMS:** Exact mass calculated for  $[C_{29}H_{51}N_5O_7 + H]^+$  requires  $m/z = 582.3867$ . Found 582.3858 (ESI+).

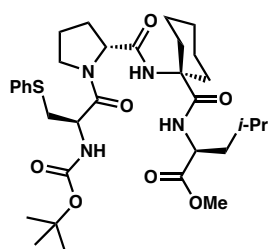

**Boc-Cys(Ph)-D-Pro-Achc-Leu-OMe (23):** Yellow/orange powder, 68% overall yield from **S8** using the methyl ester procedure. **<sup>1</sup>H-NMR** (500 MHz,  $CDCl_3$ ):  $\delta$  7.40 (d,  $J = 7.7$  Hz, 2H), 7.31 (t,  $J = 7.6$  Hz, 2H), 7.21 (t,  $J = 7.5$  Hz, 2H), 4.72–4.53 (m, 2H), 4.26 (dd,  $J = 7.7, 3.9$  Hz, 1H), 3.68 (s, 4H), 3.46 (q,  $J = 7.4$  Hz, 1H), 3.24 (ddd,  $J = 40.0, 13.7, 7.0$  Hz, 2H), 2.24–2.02 (m, 4H), 2.01–1.78 (m, 4H), 1.70–1.57 (m, 7H), 1.42 (s, 9H), 1.34–1.15 (m, 4H), 0.92 (t,  $J = 6.1$  Hz, 6H). **<sup>13</sup>C-NMR** (151 MHz,  $CDCl_3$ ):  $\delta$

174.2, 174.1, 170.7, 170.6, 144.0, 135.5, 129.3, 129.3, 126.6, 80.2, 61.4, 60.6, 52.3, 52.0, 50.6, 47.6, 41.3, 35.5, 32.8, 31.0, 28.5, 28.5, 28.4, 25.2, 25.2, 24.9, 23.2, 21.9, 21.6, 21.4. **HRMS:** Exact mass calculated for  $[C_{33}H_{50}N_4O_7S + H]^+$  requires  $m/z = 647.3478$ . Found 647.3464 (ESI+).

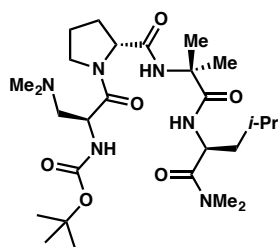

**Boc-Dmaa-D-Pro-Aib-Leu-NMe<sub>2</sub> (24):** White, foamy solid, 66% overall yield from **S1** using the dimethyl amide procedure.<sup>5</sup> **<sup>1</sup>H-NMR** (500 MHz,  $CDCl_3$ ):  $\delta$  7.19 (d,  $J = 8.9$  Hz, 1H), 6.88 (s, 1H), 6.44 (d,  $J = 6.6$  Hz, 1H), 4.97 (td,  $J = 9.0, 4.8$  Hz, 1H), 4.43 (q,  $J = 7.1$  Hz, 1H), 4.36 (dd,  $J = 7.7, 4.0$  Hz, 1H), 3.82 (td,  $J = 7.6, 4.6$  Hz, 1H), 3.56 (dt,  $J = 9.8, 7.0$  Hz, 1H), 3.10 (s, 3H), 2.90 (s, 3H), 2.85–2.67 (m, 1H), 2.42 (dd,  $J = 12.2, 7.2$  Hz, 1H), 2.29 (s, 6H), 2.28–2.18 (m, 1H), 2.17–2.02 (m, 1H), 1.98–1.85 (m,

2H), 1.68–1.56 (m, 2H), 1.51 (s, 3H), 1.48 (dd,  $J = 8.9, 5.8$  Hz, 1H), 1.44 (s, 3H), 1.41 (s, 9H), 0.92 (dd,  $J = 21.4, 6.3$  Hz, 6H). **<sup>13</sup>C-NMR** (126 MHz,  $CDCl_3$ ):  $\delta$  173.9, 172.4, 171.2, 170.9, 155.9, 79.5, 61.2, 60.1, 57.2, 50.6, 47.4, 47.1, 45.8, 42.1, 37.3, 35.9, 28.5, 28.1, 27.3, 25.1, 24.8, 24.2, 23.4, 22.3. **HRMS:** Exact mass calculated for  $[C_{27}H_{50}N_6O_6 + H]^+$  requires  $m/z = 555.3870$ . Found 555.3869 (ESI+).

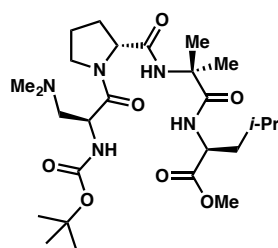

**Boc-Dmaa-D-Pro-Aib-Leu-OMe (25):** White, foamy solid, 72% overall yield from **S8** using the methyl ester procedure.<sup>5</sup> **<sup>1</sup>H-NMR** (500 MHz,  $CDCl_3$ ):  $\delta$  7.08 (d,  $J = 8.2$  Hz, 1H), 6.95 (s, 1H), 5.72 (s, 1H), 4.55 (td,  $J = 8.6, 5.5$  Hz, 1H), 4.43–4.29 (m, 2H), 3.96–3.85 (m, 1H), 3.67 (s, 3H), 3.60–3.47 (m, 1H), 2.54 (d,  $J = 7.3$  Hz, 2H), 2.28 (s, 6H), 2.27–2.19 (m, 1H), 2.08 (ddd,  $J = 11.4, 6.1, 2.6$  Hz, 1H), 2.03–1.89 (m, 2H), 1.69–1.55 (m, 3H), 1.48 (d,  $J = 2.3$  Hz, 6H), 1.41 (s, 9H), 0.91 (d,  $J = 6.4$  Hz, 6H).

**<sup>13</sup>C-NMR** (126 MHz,  $CDCl_3$ ):  $\delta$  174.3, 173.8, 171.3, 170.6, 155.9, 110.2, 80.0, 61.3, 59.8, 57.3, 52.0, 51.0, 50.9, 47.6, 45.7, 41.4, 28.5, 25.8, 25.5, 24.9, 24.9, 23.1, 22.0. **HRMS:** Exact mass calculated for  $[C_{26}H_{47}N_5O_7 + H]^+$  requires  $m/z = 542.3554$ . Found 542.3543 (ESI+).

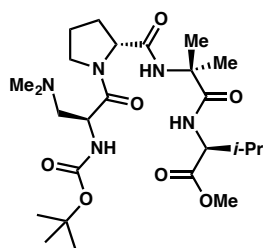

**Boc-Dmaa-D-Pro-Aib-Val-OMe (26):** White, foamy solid, 56% overall yield from **S8** using the methyl ester procedure.<sup>5</sup> **<sup>1</sup>H-NMR** (500 MHz,  $CDCl_3$ ):  $\delta$  7.12–6.95 (m, 2H), 5.77 (brs, 1H), 4.52–4.42 (m, 2H), 4.39 (td,  $J = 7.2, 5.3$  Hz, 1H), 3.98–3.81 (m, 1H), 3.69 (s, 3H), 3.61–3.47 (m, 1H), 2.64–2.54 (m, 2H), 2.31 (s, 6H), 2.29–2.21 (m, 1H), 2.20–1.91 (m, 4H),

1.50 (d,  $J = 7.3$  Hz, 6H), 1.41 (s, 9H), 0.93 (dd,  $J = 6.9, 4.6$  Hz, 6H).  $^{13}\text{C-NMR}$  (126 MHz,  $\text{CDCl}_3$ ):  $\delta$  174.4, 172.8, 171.2, 170.7, 155.9, 110.2, 80.0, 61.4, 59.8, 57.6, 57.4, 51.9, 50.9, 47.6, 45.7, 31.4, 28.5, 25.8, 25.6, 24.9, 19.2, 18.2. **HRMS:** Exact mass calculated for  $[\text{C}_{25}\text{H}_{45}\text{N}_5\text{O}_7 + \text{H}]^+$  requires  $m/z = 528.3397$ . Found 528.3398 (ESI+).

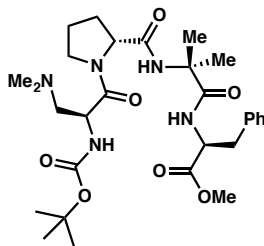

**Boc-Dmaa-D-Pro-Aib-Phe-OMe (27):** White, foamy solid, 8–23% overall yield from **S8** using the methyl ester procedure.<sup>4–7</sup>  $^1\text{H-NMR}$  (600 MHz,  $\text{CDCl}_3$ ):  $\delta$  7.28–7.26 (m, 2H), 7.22–7.16 (m, 3H), 7.11 (d,  $J = 8.0$  Hz, 1H), 6.90 (s, 1H), 5.71 (brs, 1H), 4.81 (app q,  $J = 7.1$  Hz, 1H), 4.44–4.34 (m, 2H), 3.92–3.84 (m, 1H), 3.64 (s, 3H), 3.58–3.51 (m, 1H), 3.23–3.01 (m, 2H), 2.58–2.48 (m, 2H), 2.28 (s, 6H), 2.29–2.19 (m, 1H), 2.13–2.03 (m, 1H), 2.02–1.90 (m, 2H), 1.61 (s, 2H), 1.48 (s, 3H), 1.42 (s, 9H), 1.37 (s, 3H).  $^{13}\text{C-NMR}$  (151 MHz,  $\text{CDCl}_3$ ):  $\delta$  174.1, 172.6, 171.3, 170.8, 155.9, 136.8, 129.5, 128.5, 126.9, 79.9, 61.1, 59.9, 57.2, 53.6, 52.2, 50.9, 47.5, 45.8, 38.2, 28.5, 28.4, 26.1, 24.9, 24.9. **HRMS:** Exact mass calculated for  $[\text{C}_{29}\text{H}_{45}\text{N}_5\text{O}_7 + \text{H}]^+$  requires  $m/z = 576.3397$ . Found 576.3389 (ESI+).

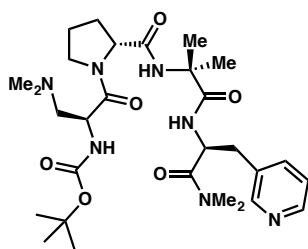

**Boc-Dmaa-D-Pro-Aib-3-Pal-NMe<sub>2</sub> (28):** White, foamy solid, 26% overall yield from **S1** using the dimethyl amide procedure.<sup>5</sup>  $^1\text{H-NMR}$  (500 MHz,  $\text{CDCl}_3$ ):  $\delta$  8.48 (d,  $J = 2.1$  Hz, 1H), 8.41 (dd,  $J = 4.9, 1.6$  Hz, 1H), 7.58 (dt,  $J = 7.8, 2.0$  Hz, 1H), 7.49 (d,  $J = 8.9$  Hz, 1H), 7.18 (dd,  $J = 7.8, 4.9$  Hz, 1H), 6.95 (s, 1H), 6.52 (d,  $J = 7.0$  Hz, 1H), 5.07 (dt,  $J = 8.9, 7.5$  Hz, 1H), 4.46 (q,  $J = 7.2$  Hz, 1H), 4.31 (dd,  $J = 8.0, 4.4$  Hz, 1H), 3.78 (ddd,  $J = 10.1, 7.3, 5.4$  Hz, 1H), 3.59 (dt,  $J = 10.0, 6.9$  Hz, 1H), 3.09–2.98 (m, 2H), 2.92 (s, 3H), 2.86 (s, 3H), 2.84–2.79 (m, 1H), 2.45 (dd,  $J = 12.3, 6.8$  Hz, 1H), 2.28 (s, 6H), 2.17–2.10 (m, 1H), 2.10–2.03 (m, 1H), 2.02–1.95 (m, 1H), 1.94–1.85 (m, 1H), 1.45 (s, 3H), 1.40 (s, 9H), 1.22 (s, 3H).  $^{13}\text{C-NMR}$  (126 MHz,  $\text{CDCl}_3$ ):  $\delta$  173.7, 171.4, 171.1, 170.7, 156.0, 150.9, 147.9, 137.1, 133.0, 123.4, 79.7, 61.2, 60.3, 57.3, 50.5, 49.5, 47.5, 45.8, 37.3, 36.0, 35.7, 28.5, 26.9, 25.1, 24.2. **HRMS:** Exact mass calculated for  $[\text{C}_{29}\text{H}_{47}\text{N}_7\text{O}_6 + \text{H}]^+$  requires  $m/z = 590.3666$ . Found 590.3658 (ESI+).

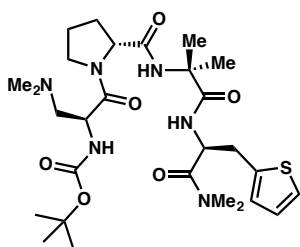

**Boc-Dmaa-D-Pro-Aib-2-Thi-NMe<sub>2</sub> (29):** Off-white, foamy solid, 30% overall yield from **S1** using the dimethyl amide procedure.<sup>5</sup>  $^1\text{H-NMR}$  (500 MHz,  $\text{CDCl}_3$ ):  $\delta$  7.39 (d,  $J = 8.7$  Hz, 1H), 7.10 (dd,  $J = 5.0, 1.3$  Hz, 1H), 6.89–6.82 (m, 3H), 6.45 (d,  $J = 6.7$  Hz, 1H), 5.10 (dt,  $J = 8.6, 7.1$  Hz, 1H), 4.43 (q,  $J = 7.1$  Hz, 1H), 4.33 (dd,  $J = 7.9, 4.1$  Hz, 1H), 3.86–3.76 (m, 1H), 3.57 (dt,  $J = 9.6, 6.9$  Hz, 1H), 3.29 (dd,  $J = 14.6, 7.7$  Hz, 1H), 3.20 (dd,  $J = 14.5, 6.8$  Hz, 1H), 2.92 (s, 3H), 2.85 (s, 3H), 2.75 (dd,  $J = 12.3, 7.3$  Hz, 1H), 2.43 (dd,  $J = 12.3, 7.2$  Hz, 1H), 2.27 (s, 6H), 2.22–2.15 (m, 1H), 2.13–2.03 (m, 1H), 1.99–1.85 (m, 2H), 1.48 (s, 3H), 1.40 (s, 9H), 1.34 (s, 3H).  $^{13}\text{C-NMR}$  (126 MHz,  $\text{CDCl}_3$ ):  $\delta$  173.7, 171.3, 171.1, 170.9, 156.0, 139.2, 126.9, 126.4, 124.3, 79.6, 61.1, 60.1, 57.2, 50.6, 50.1, 47.4, 45.9, 37.3, 35.9, 32.8, 28.5, 28.3, 27.0, 25.0, 24.1. **HRMS:** Exact mass calculated for  $[\text{C}_{28}\text{H}_{46}\text{N}_6\text{O}_6\text{S} + \text{H}]^+$  requires  $m/z = 595.3278$ . Found 595.3278 (ESI+).

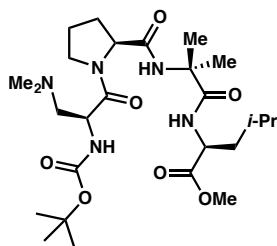

**Boc-Dmaa-Pro-Aib-Leu-OMe (30):** White, foamy solid, 76% overall yield from **S8** using the methyl ester procedure.<sup>5</sup> NMR Spectra show conformational isomerism (~25% minor conformer in CDCl<sub>3</sub>). **Major Conformer (75%):** <sup>1</sup>H-NMR (500 MHz, CDCl<sub>3</sub>): δ 7.16 (d, *J* = 8.0 Hz, 1H), 7.09 (d, *J* = 8.7 Hz, 1H), 6.95 (s, 1H), 5.33 (brs, 1H), 4.55–4.47 (m, 3H), 3.80 (q, *J* = 8.2 Hz, 1H), 3.69 (s, 3H), 3.62–3.57 (m, 1H), 2.71–2.59 (m, 1H), 2.59–2.49 (s, 1H), 2.27 (s, 6H), 2.22–2.15 (m, 1H), 2.11–2.01 (m, 2H), 2.01–1.94 (m, 1H), 1.68–1.54 (m, 3H), 1.49 (s, 3H), 1.48 (s, 3H), 1.42 (s, 9H), 0.92 (dd, *J* = 6.2, 3.5 Hz, 6H). <sup>13</sup>C-NMR (126 MHz, CDCl<sub>3</sub>): δ 174.2, 173.5, 171.9, 170.9, 155.6, 80.1, 61.4, 61.0, 57.5, 52.1, 51.1, 50.6, 47.8, 46.2, 41.5, 32.1, 28.5, 28.1, 25.7, 25.2, 25.0, 23.0, 22.1. **Minor Conformer (25%):** <sup>1</sup>H-NMR (500 MHz, CDCl<sub>3</sub>): 7.13 (s, 1H), 7.09 (d, *J* = 8.7 Hz, 1H), 5.47 (bs, 1H), 4.62 (td, *J* = 8.9, 5.2 Hz, 1H), 4.58–4.54 (m, 5 H), 4.44 (q, *J* = 7.6 Hz, 3H), 3.85–3.80 (m, 1H), 3.67–3.61 (m, 1H), 2.64–2.54 (m, 1H), 2.40 (dd, *J* = 12.6, 6.5 Hz, 2H), 2.12–1.97 (m, 2H), 1.96–1.92 (m, 1H), 1.83–1.71 (m, 1H), 1.69–1.53 (m, 3H), 1.52 (s, 3H), 1.51 (s, 3H), 1.41 (s, 9H), 0.95–0.92 (m, 3H), 0.87 (d, *J* = 6.5 Hz, 3H). <sup>13</sup>C-NMR (126 MHz, CDCl<sub>3</sub>): δ 174.1, 174.0, 172.2, 170.6, 156.5, 80.3, 61.2, 60.4, 57.4, 52.1, 51.6, 51.2, 50.6, 47.0, 45.9, 42.4, 32.2, 28.6, 25.8, 25.6, 24.1, 22.9, 22.2. **HRMS:** Exact mass calculated for [C<sub>26</sub>H<sub>47</sub>N<sub>5</sub>O<sub>7</sub> + H]<sup>+</sup> requires *m/z* = 542.3554. Found 542.3555 (ESI+).

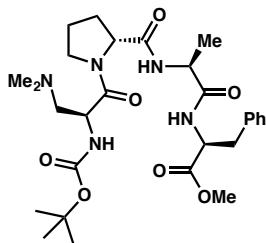

**Boc-Dmaa-D-Pro-Ala-Phe-OMe (31):** Off-white, foamy solid, uncalculated yield from **S8** using the methyl ester procedure (1.00 mmol scale).<sup>5</sup> <sup>1</sup>H-NMR (600 MHz, CDCl<sub>3</sub>): δ 7.29–7.09 (m, 6H), 7.05 (d, *J* = 7.5 Hz, 1H), 5.83 (d, *J* = 5.5 Hz, 1H), 4.80 (q, *J* = 6.9 Hz, 1H), 4.49–4.44 (m, 1H), 4.37 (td, *J* = 7.3, 5.2 Hz, 2H), 3.83–3.77 (m, 1H), 3.64 (s, 3H), 3.53 (q, *J* = 8.1 Hz, 1H), 3.17–3.04 (m, 2H), 2.77 (s, 2H), 2.59–2.47 (m, 1H), 2.27 (s, 6H), 2.24–2.18 (m, 1H), 2.04–1.88 (m, 2H), 1.41 (s, 9H), 1.31 (d, *J* = 7.3 Hz, 3H). <sup>13</sup>C-NMR (151 MHz, CDCl<sub>3</sub>): δ 172.3, 172.1, 171.7, 170.7, 155.9, 136.4, 129.4, 128.5, 126.9, 80.0, 60.8, 59.8, 53.3, 52.3, 50.7, 49.6, 47.3, 45.7, 38.0, 28.9, 28.4, 24.6, 17.3. **HRMS:** Exact mass calculated for [C<sub>28</sub>H<sub>43</sub>N<sub>5</sub>O<sub>7</sub> + H]<sup>+</sup> requires *m/z* = 562.3241. Found 562.3237 (ESI+).

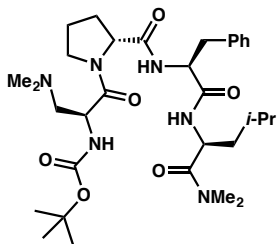

**Boc-Dmaa-D-Pro-Phe-Leu-NMe<sub>2</sub> (32):** White, foamy solid, 85% overall yield from **S1** using the dimethyl amide procedure.<sup>5</sup> <sup>1</sup>H-NMR (500 MHz, CDCl<sub>3</sub>): δ 7.42 (d, *J* = 9.0 Hz, 1H), 7.30–7.12 (m, 6H), 6.78 (d, *J* = 8.2 Hz, 1H), 6.72 (d, *J* = 9.2 Hz, 1H), 5.01 (td, *J* = 9.4, 4.5 Hz, 1H), 4.77–4.63 (m, 1H), 4.57–4.40 (m, 1H), 4.40–4.20 (m, 1H), 3.83–3.67 (m, 1H), 3.66–3.42 (m, 1H), 3.24 (dd, *J* = 14.0, 7.1 Hz, 1H), 3.12 (s, 3H), 3.07 (dd, *J* = 14.0, 5.0 Hz, 1H), 2.90 (s, 3H), 2.89–2.80 (m, 1H), 2.24 (s, 6H), 2.22–2.07 (m, 2H), 1.94–1.82 (m, 2H), 1.63 (ddd, *J* = 13.8, 9.7, 4.5 Hz, 1H), 1.51–1.41 (m, 2H), 1.41 (s, 9H), 0.90 (dd, *J* = 39.4, 6.4 Hz, 6H). <sup>13</sup>C-NMR (126 MHz, CDCl<sub>3</sub>): δ 172.0, 171.3, 171.1, 170.1, 156.0, 136.8, 129.5, 128.7, 127.1, 79.5, 60.7, 60.6, 54.5, 50.2, 47.3, 46.8, 45.9, 41.6, 37.3, 35.9, 28.5, 28.1, 25.2, 24.4, 23.4, 22.2. **HRMS:** Exact mass calculated for [C<sub>32</sub>H<sub>52</sub>N<sub>6</sub>O<sub>6</sub> + H]<sup>+</sup> requires *m/z* = 617.4027. Found 617.4023 (ESI+).



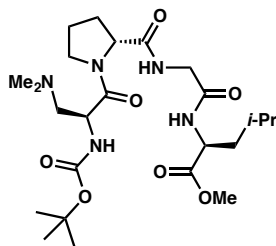

**Boc-Dmaa-D-Pro-Gly-Leu-OMe (33):** White, foamy solid, 24% overall yield from **S8** using the methyl ester procedure. **<sup>1</sup>H-NMR** (500 MHz, CDCl<sub>3</sub>): δ 7.67 (s, 1H), 7.18 (d, *J* = 8.1 Hz, 1H), 5.84 (s, 1H), 4.60–4.46 (m, 2H), 4.34 (d, *J* = 8.2 Hz, 1H), 4.12 (dd, *J* = 17.0, 7.5 Hz, 1H), 4.03 (s, 1H), 3.70 (s, 3H), 3.67–3.51 (m, 2H), 2.73 (s, 1H), 2.48 (s, 1H), 2.33 (s, 6H), 2.28–2.14 (m, 2H), 2.13–1.93 (m, 2H), 1.73–1.56 (m, 3H), 1.41 (s, 9H), 0.91 (t, *J* = 6.4 Hz, 6H). **<sup>13</sup>C-NMR** (126 MHz, CDCl<sub>3</sub>): δ 173.3, 171.7, 171.2, 169.2, 156.7, 80.9, 61.6, 59.4, 52.1, 50.9, 47.9, 45.7, 43.4, 41.2, 29.4, 28.4, 24.8, 24.8, 23.0, 21.9. **HRMS:** Exact mass calculated for [C<sub>24</sub>H<sub>43</sub>N<sub>5</sub>O<sub>7</sub> + H]<sup>+</sup> requires *m/z* = 514.3241. Found 514.3260 (ESI+).

**NOTE:** Spectra of **21** and **30** were also acquired in methanol-*d*<sub>4</sub>, acetone-*d*<sub>6</sub>, and dimethylsulfoxide-*d*<sub>6</sub>. The integrations of the major and minor peaks changed, providing evidence that the species are indeed conformers/rotamers.

**NOTE:** Peptides **34–37** were not synthesized herein. Their previously reported X-ray crystal structures were used to supplement our analyses.<sup>8–11</sup>

# E. <sup>1</sup>H- & <sup>13</sup>C-NMR Spectra of Peptides 3–33

## Peptide 3

<sup>1</sup>H-NMR (500 MHz, CDCl<sub>3</sub>)

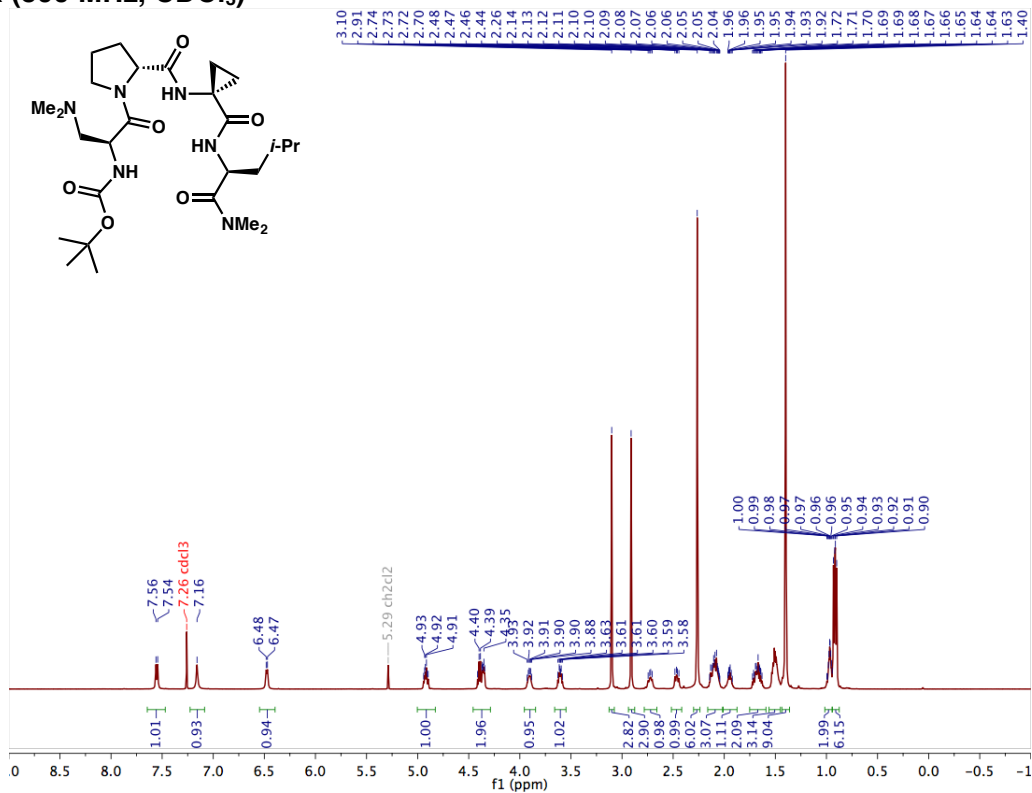

<sup>13</sup>C-NMR (126 MHz, CDCl<sub>3</sub>)

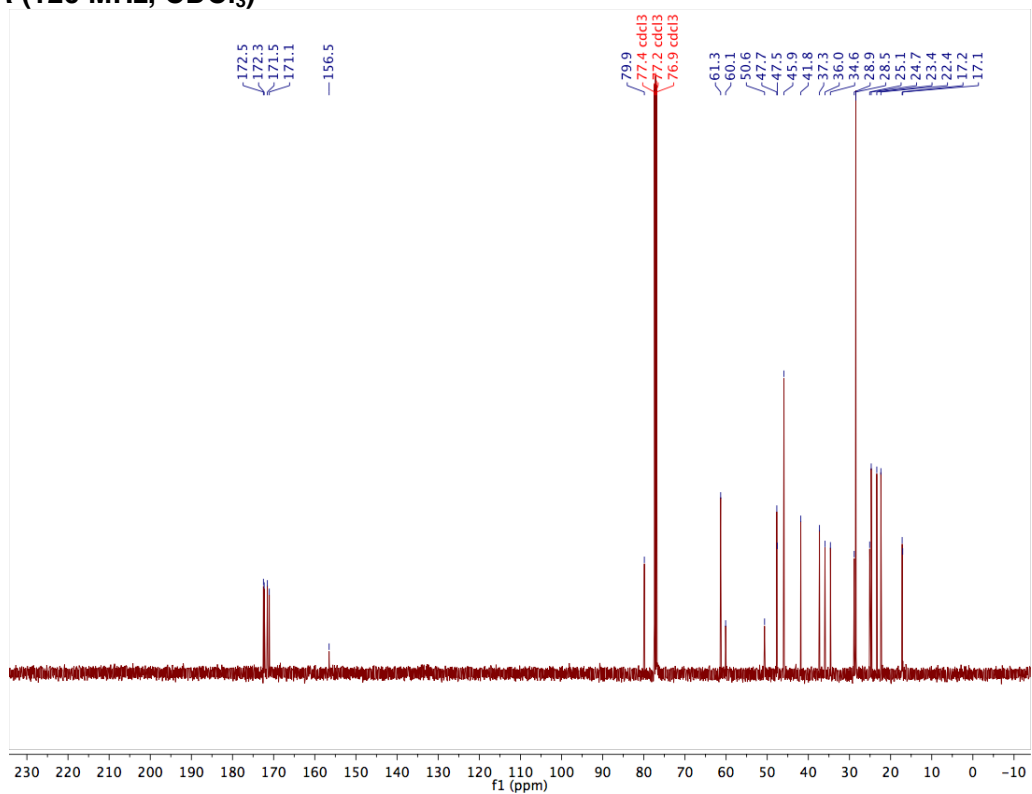







**Peptide 7**

**<sup>1</sup>H-NMR (500 MHz, CDCl<sub>3</sub>)**

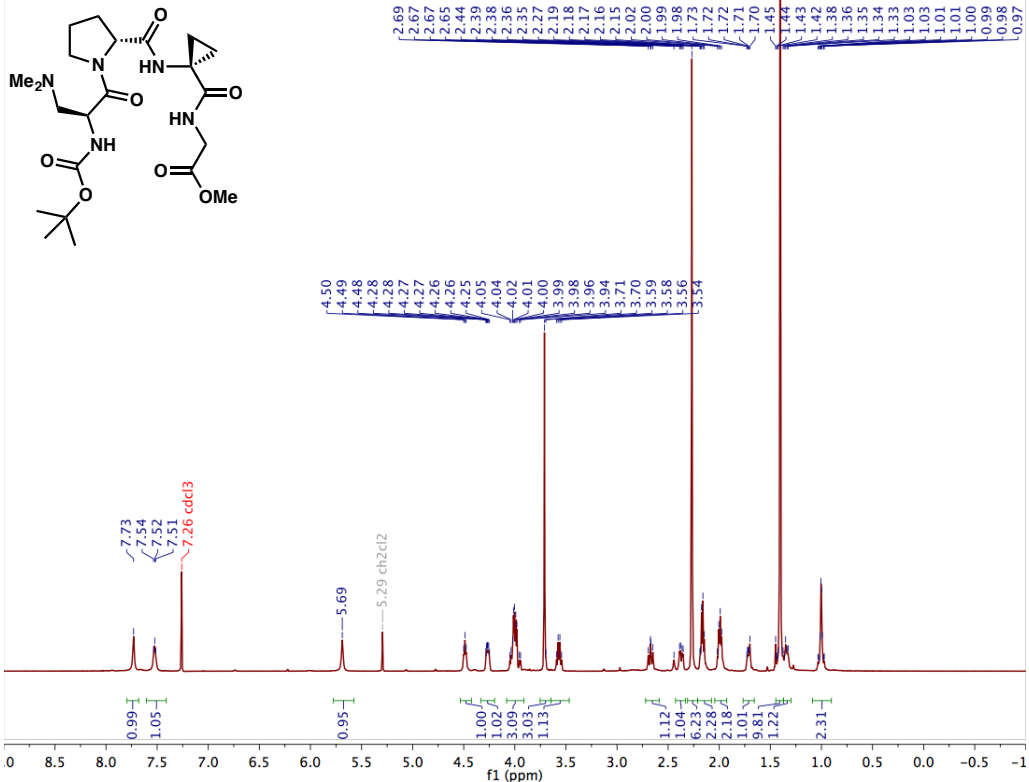

**<sup>13</sup>C-NMR (126 MHz, CDCl<sub>3</sub>)**

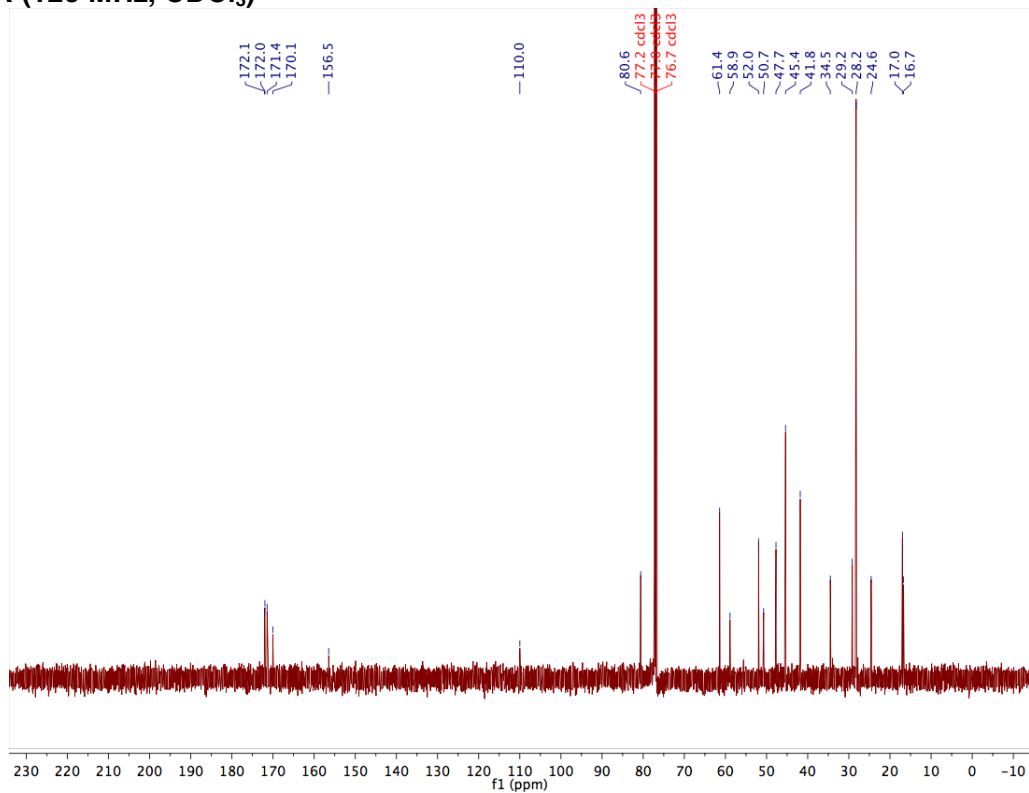

**Peptide 8**

**<sup>1</sup>H-NMR (500 MHz, CDCl<sub>3</sub>)**

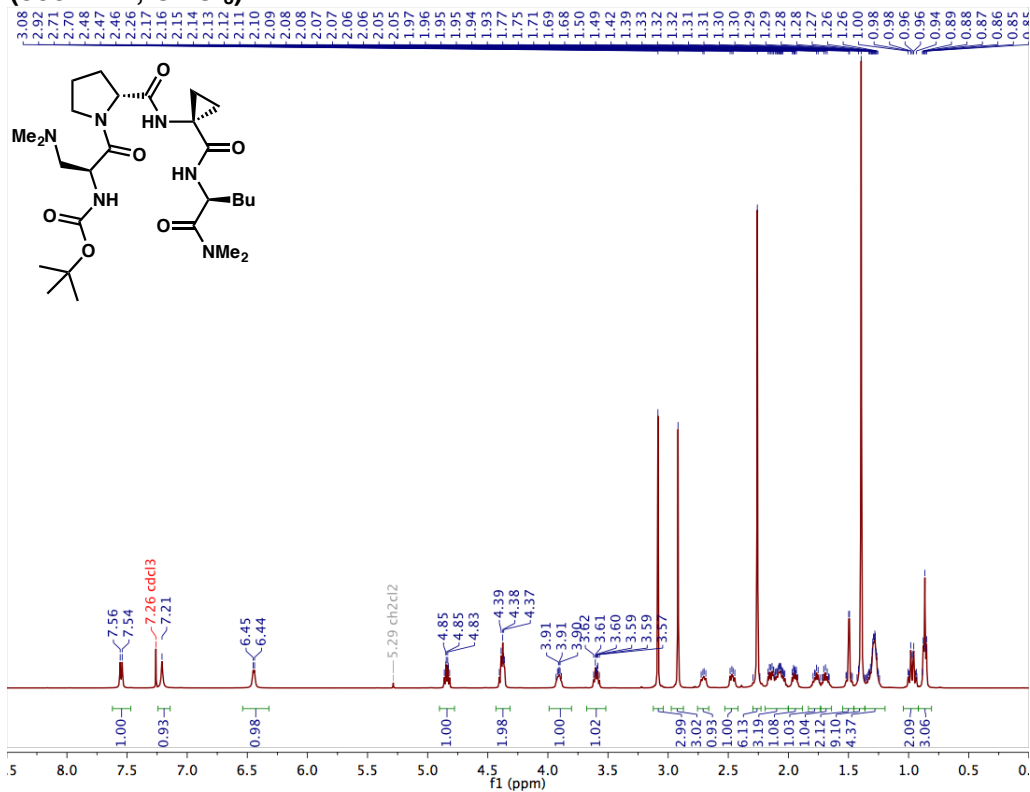

**<sup>13</sup>C-NMR (126 MHz, CDCl<sub>3</sub>)**

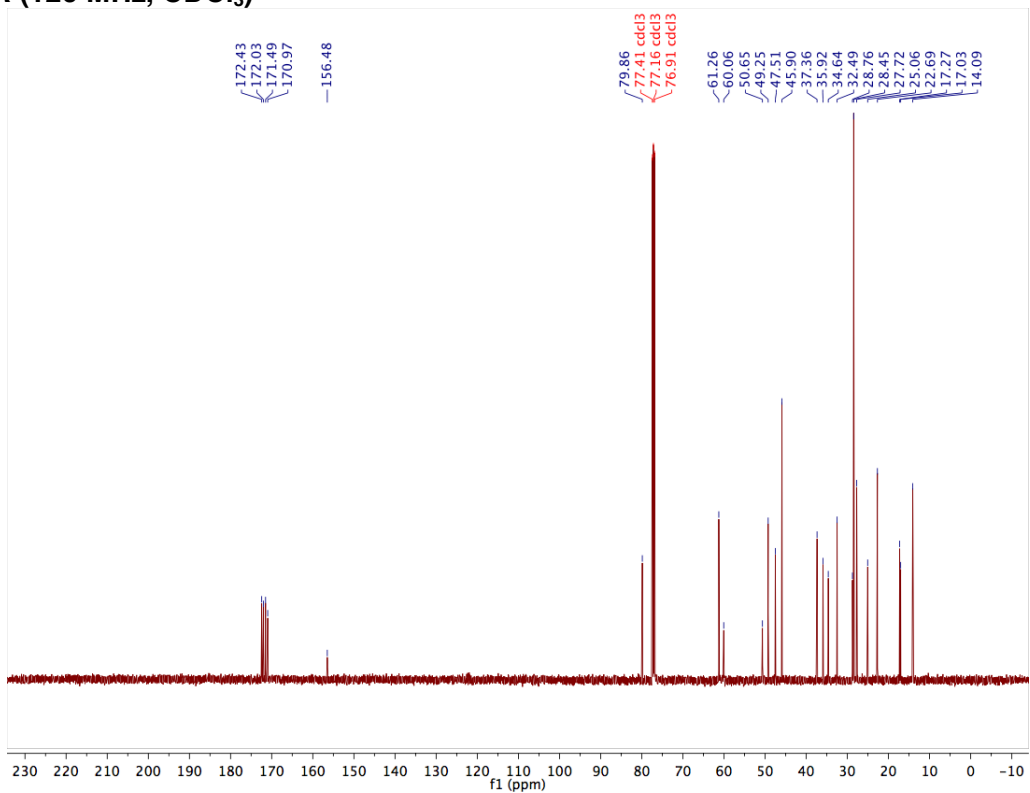











**Peptide 13**  
<sup>1</sup>H-NMR (600 MHz, CDCl<sub>3</sub>)

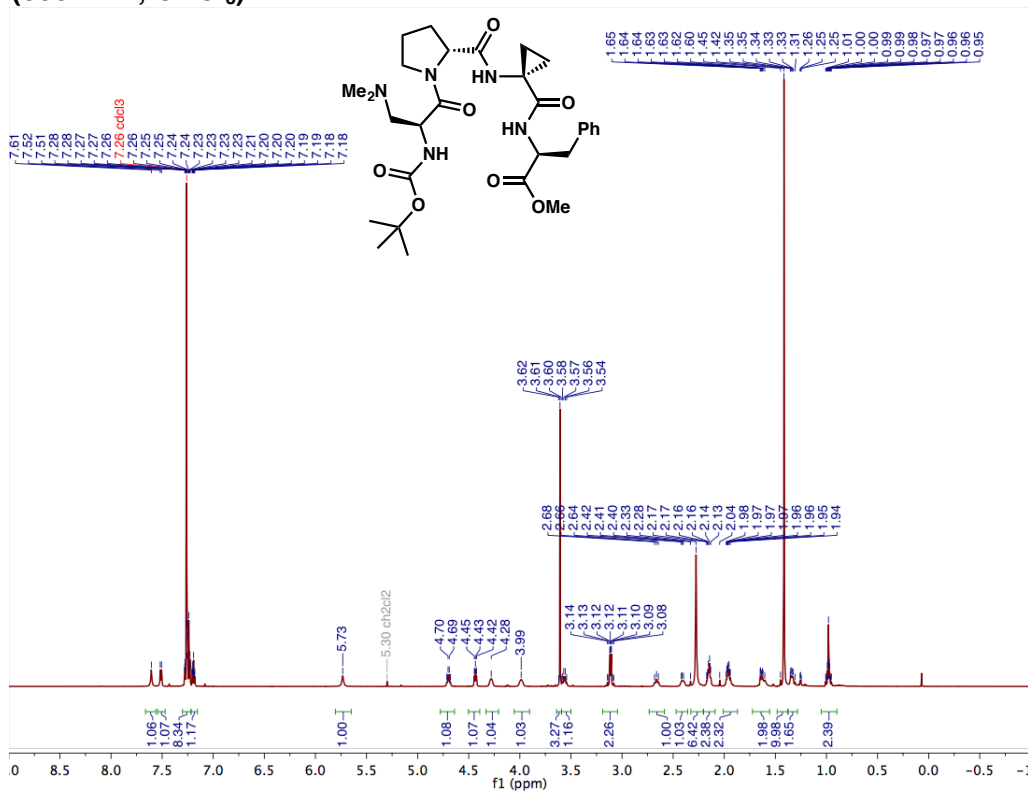

<sup>13</sup>C-NMR (151 MHz, CDCl<sub>3</sub>)

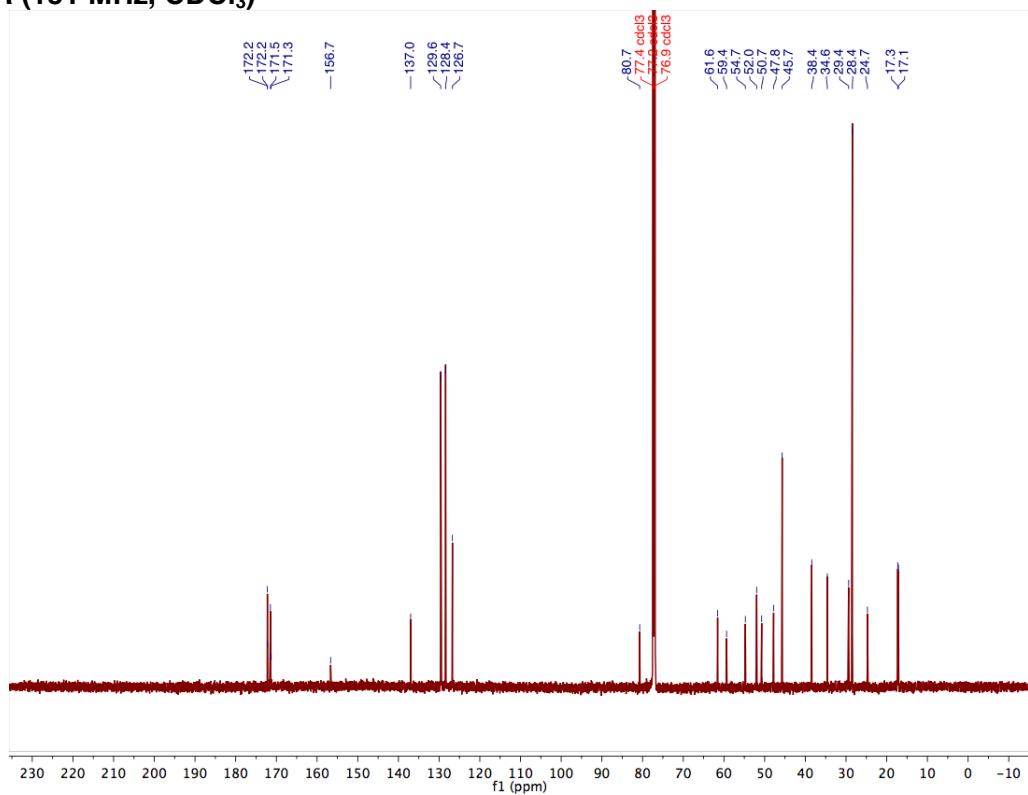

Peptide 14

<sup>1</sup>H-NMR (500 MHz, CDCl<sub>3</sub>)

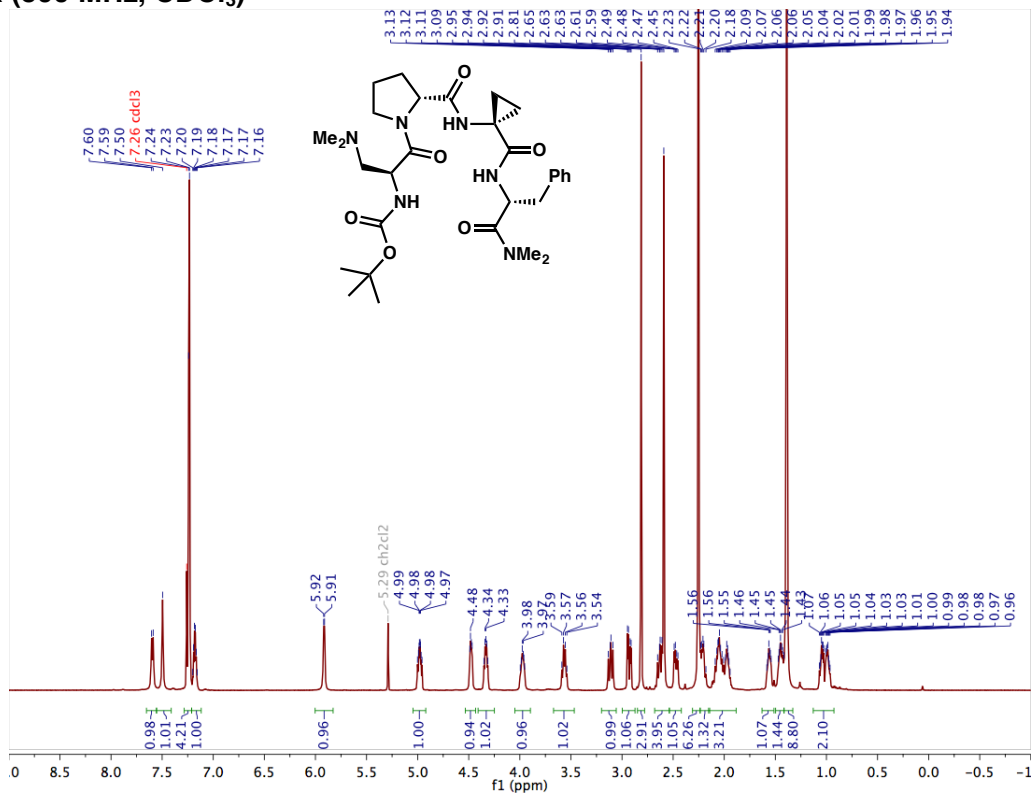

<sup>13</sup>C-NMR (126 MHz, CDCl<sub>3</sub>)

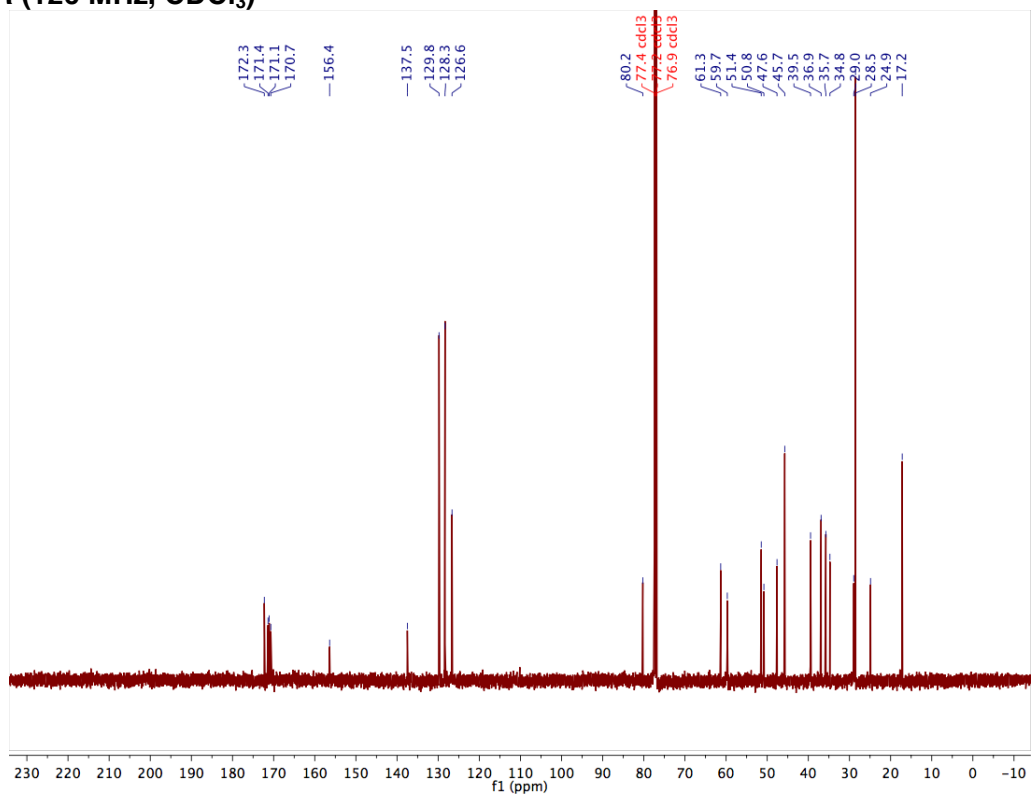

**Peptide 15**  
<sup>1</sup>H-NMR (600 MHz, CDCl<sub>3</sub>)

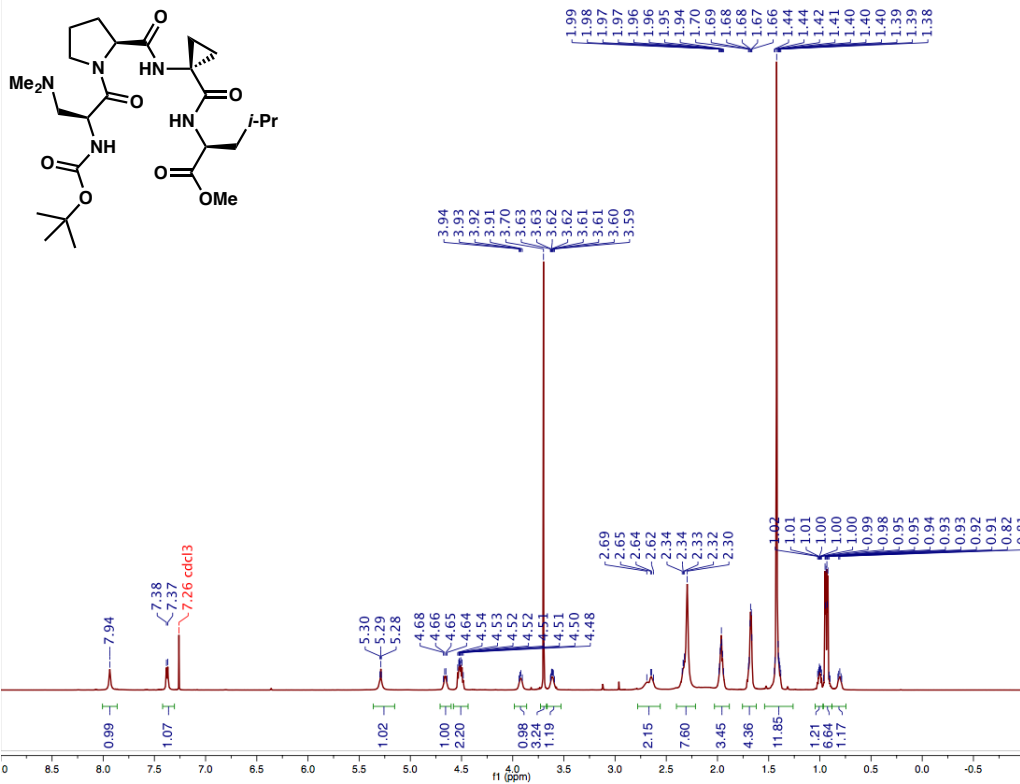

<sup>13</sup>C-NMR (151 MHz, CDCl<sub>3</sub>)

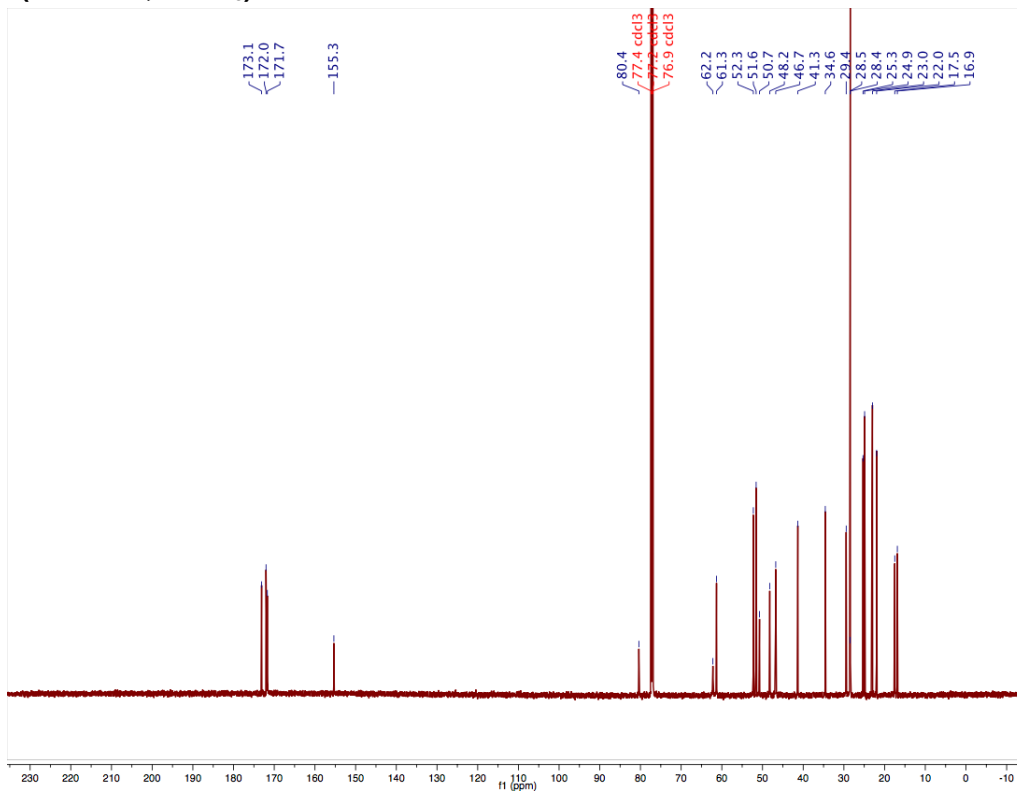







**Peptide 18**

**<sup>1</sup>H-NMR (500 MHz, CDCl<sub>3</sub>)**

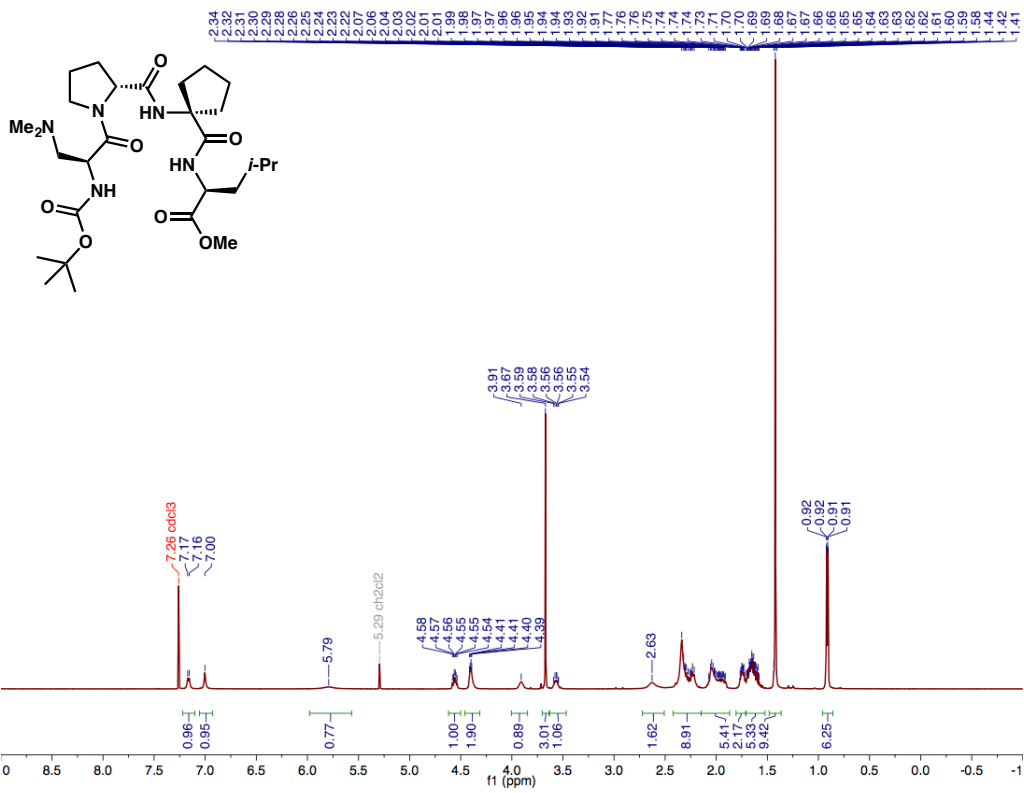

**<sup>13</sup>C-NMR (126 MHz, CDCl<sub>3</sub>)**

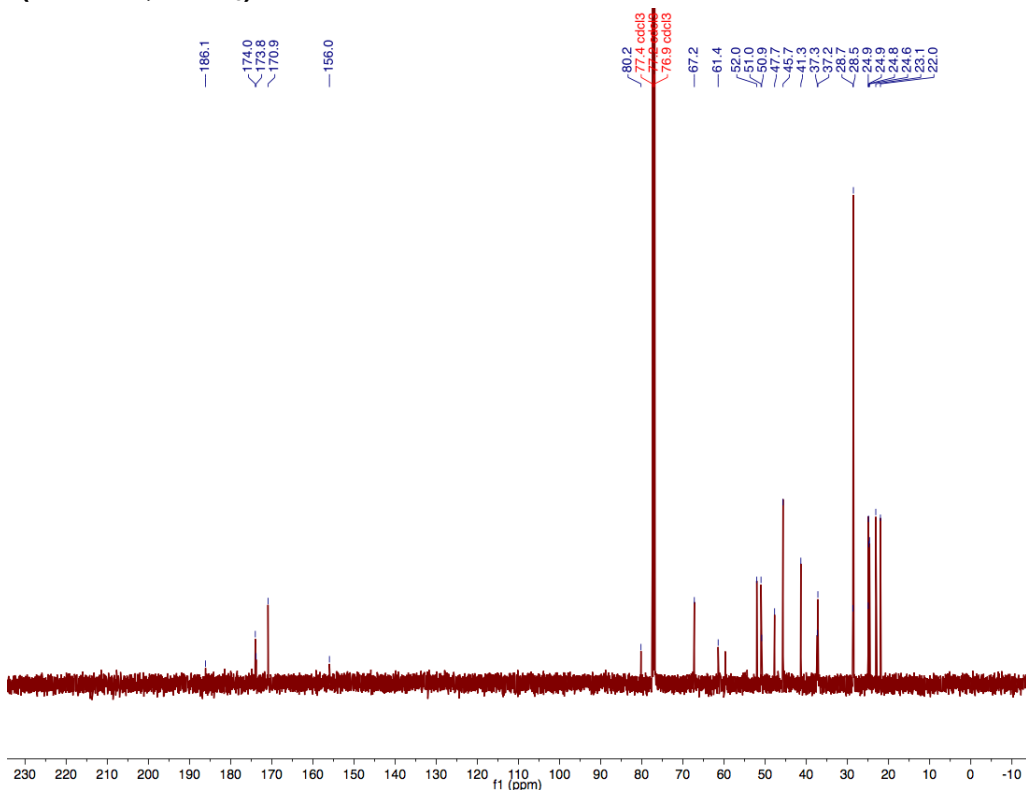

**Peptide 19**

**<sup>1</sup>H-NMR (500 MHz, CDCl<sub>3</sub>)**

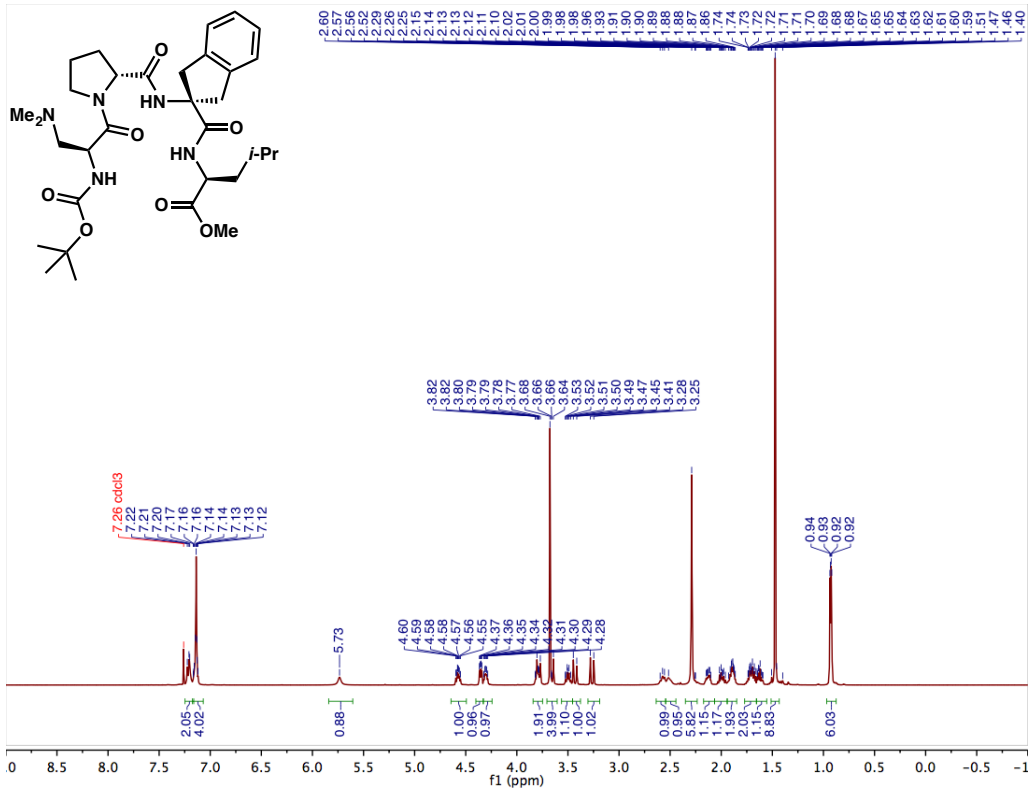

**<sup>13</sup>C-NMR (126 MHz, CDCl<sub>3</sub>)**

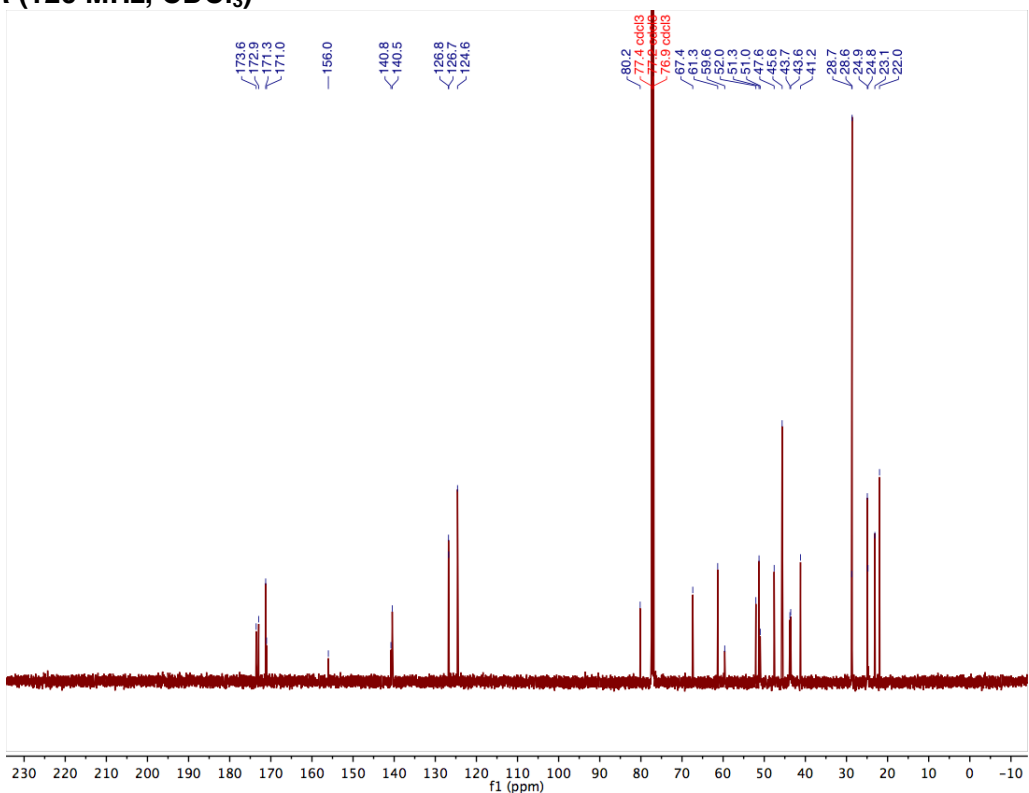

**Peptide 20**

**<sup>1</sup>H-NMR (500 MHz, CDCl<sub>3</sub>)**

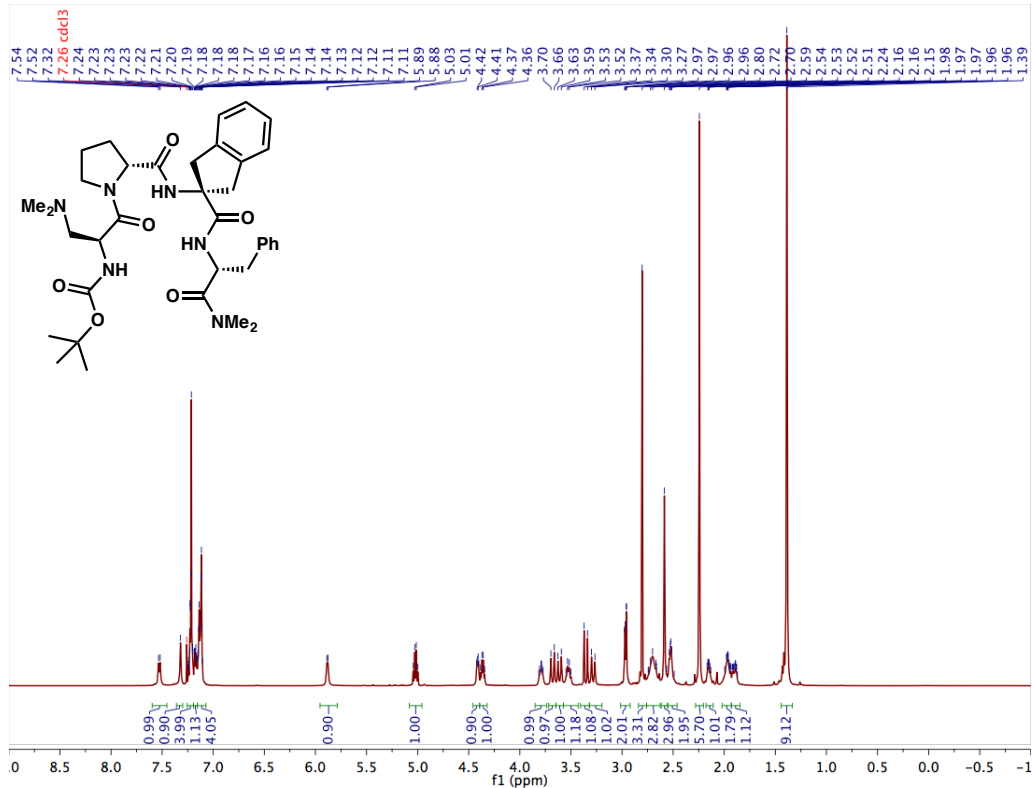

**<sup>13</sup>C-NMR (126 MHz, CDCl<sub>3</sub>)**

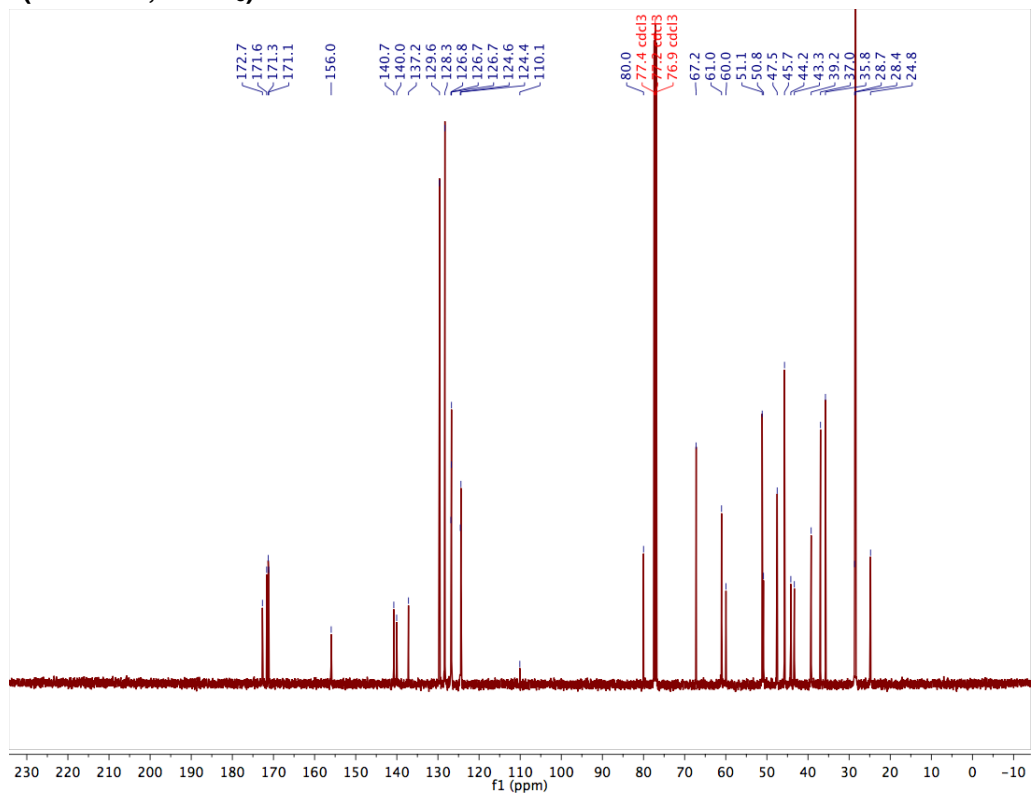





**Peptide 23**

**<sup>1</sup>H-NMR (500 MHz, CDCl<sub>3</sub>)**

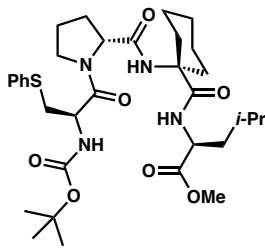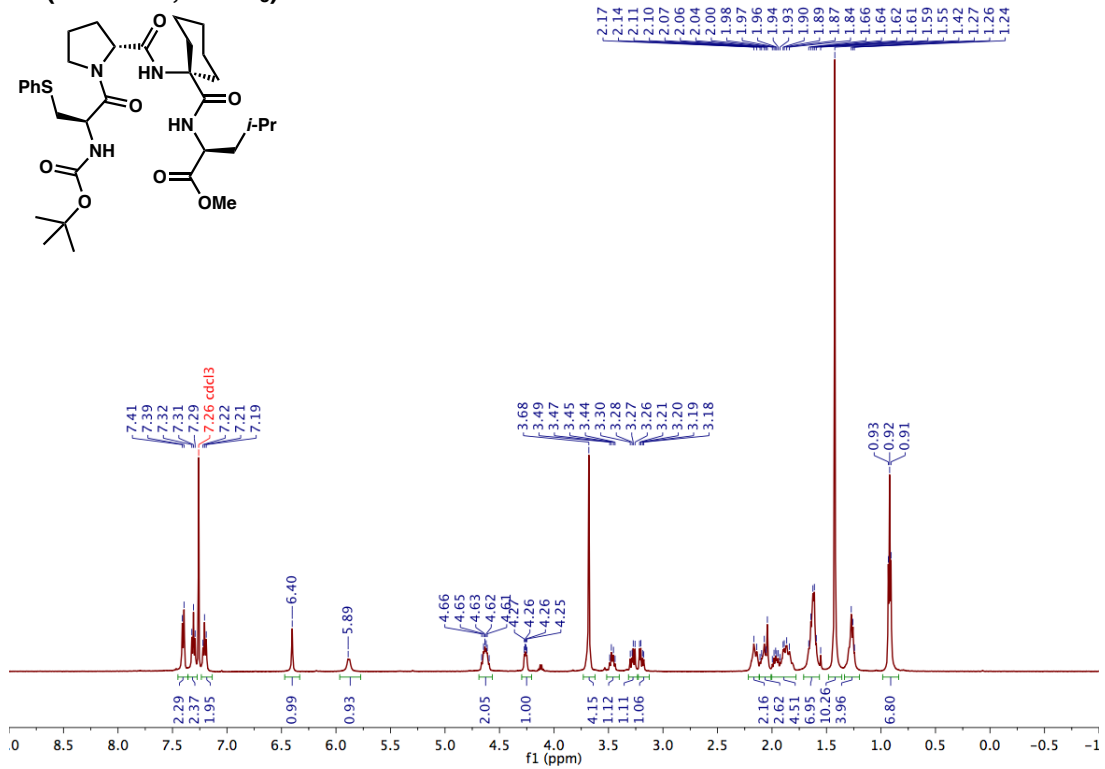

**<sup>13</sup>C-NMR (151 MHz, CDCl<sub>3</sub>)**

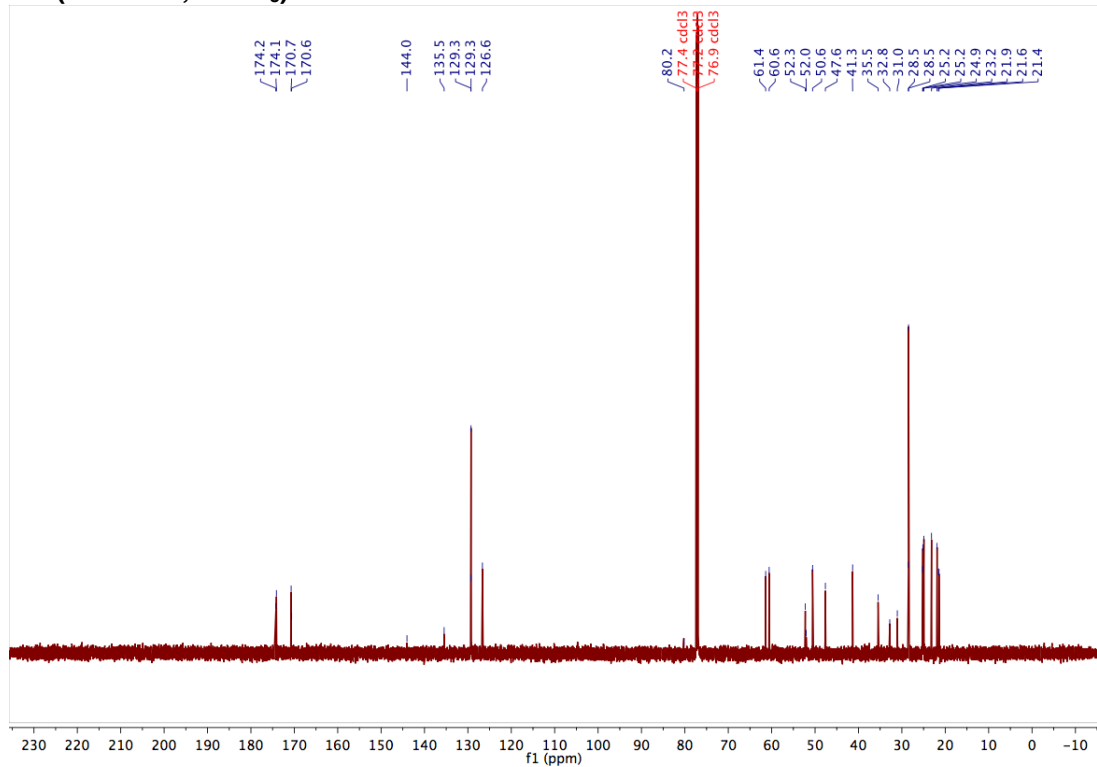

**Peptide 24**

**<sup>1</sup>H-NMR (500 MHz, CDCl<sub>3</sub>)**

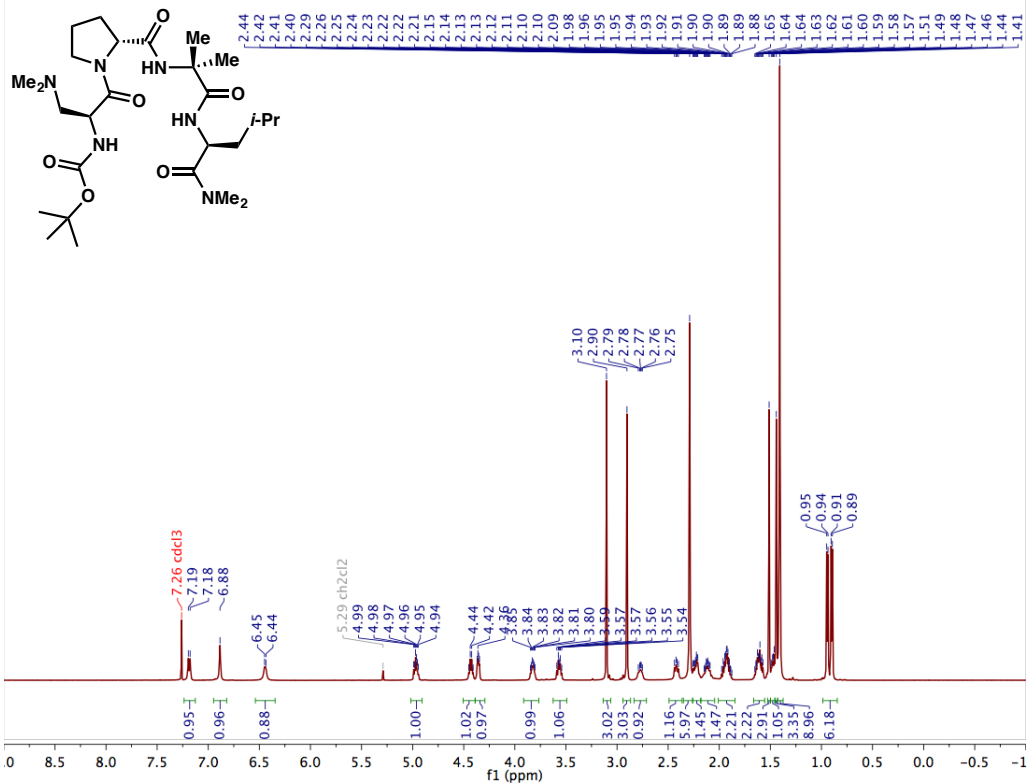

**<sup>13</sup>C-NMR (126 MHz, CDCl<sub>3</sub>)**

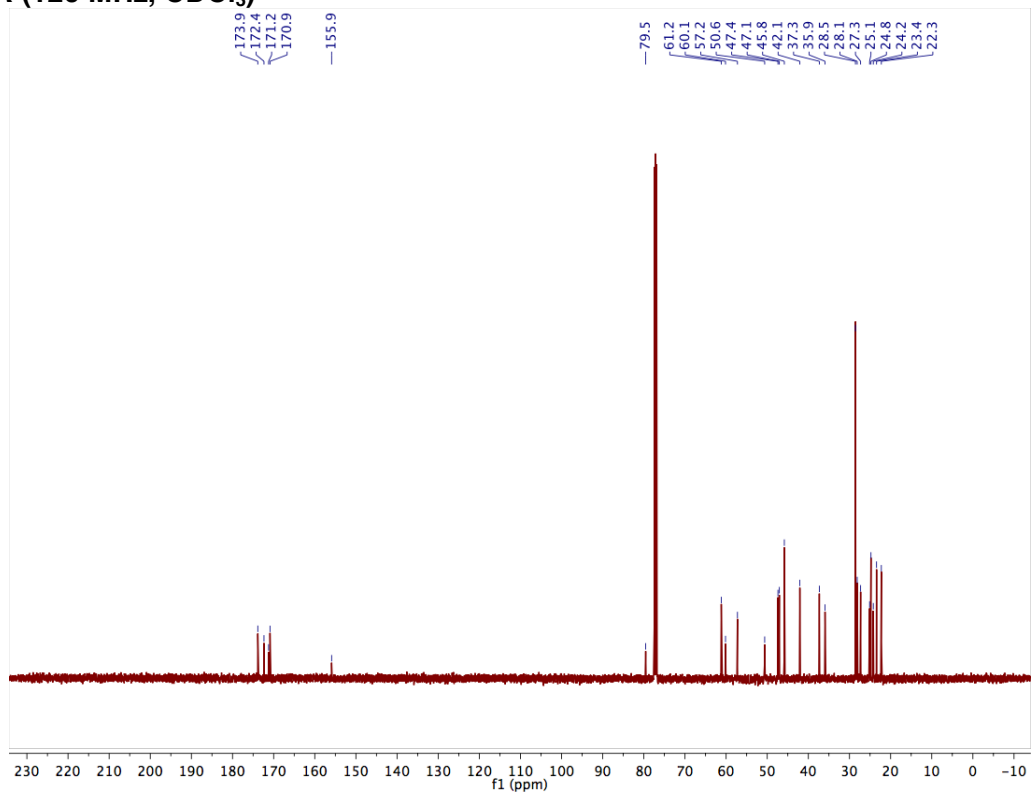

**Peptide 25**

**<sup>1</sup>H-NMR (500 MHz, CDCl<sub>3</sub>)**

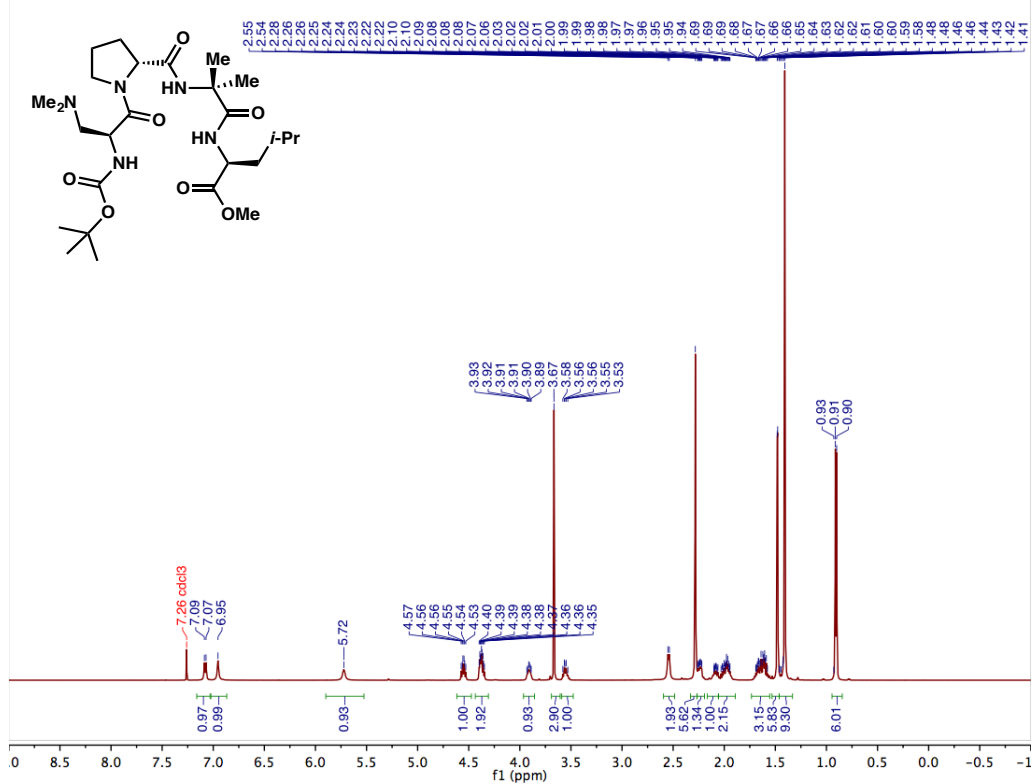

**<sup>13</sup>C-NMR (126 MHz, CDCl<sub>3</sub>)**

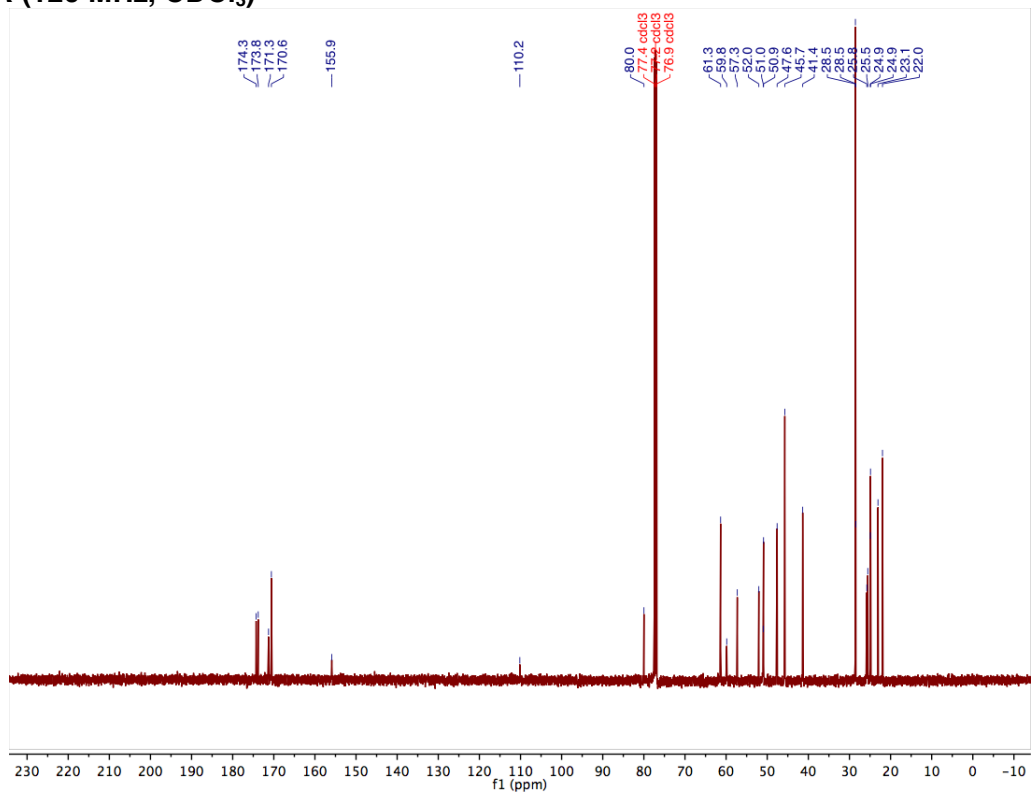



# Peptide 26

<sup>1</sup>H-NMR (500 MHz, CDCl<sub>3</sub>)

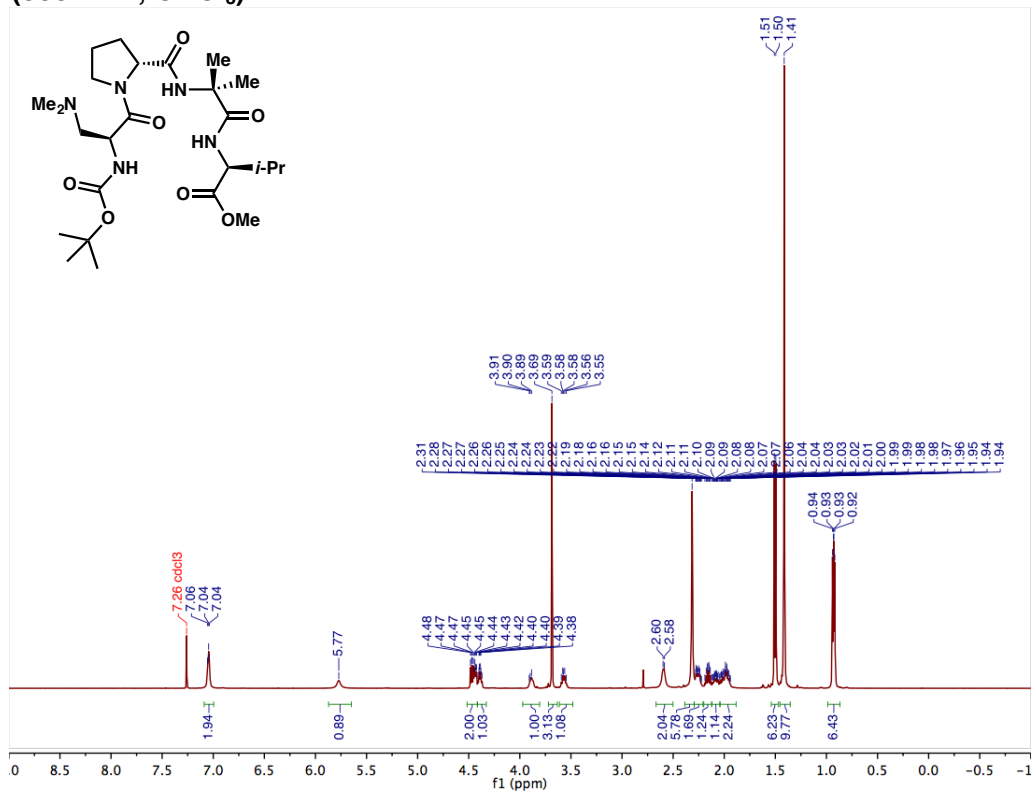

<sup>13</sup>C-NMR (126 MHz, CDCl<sub>3</sub>)

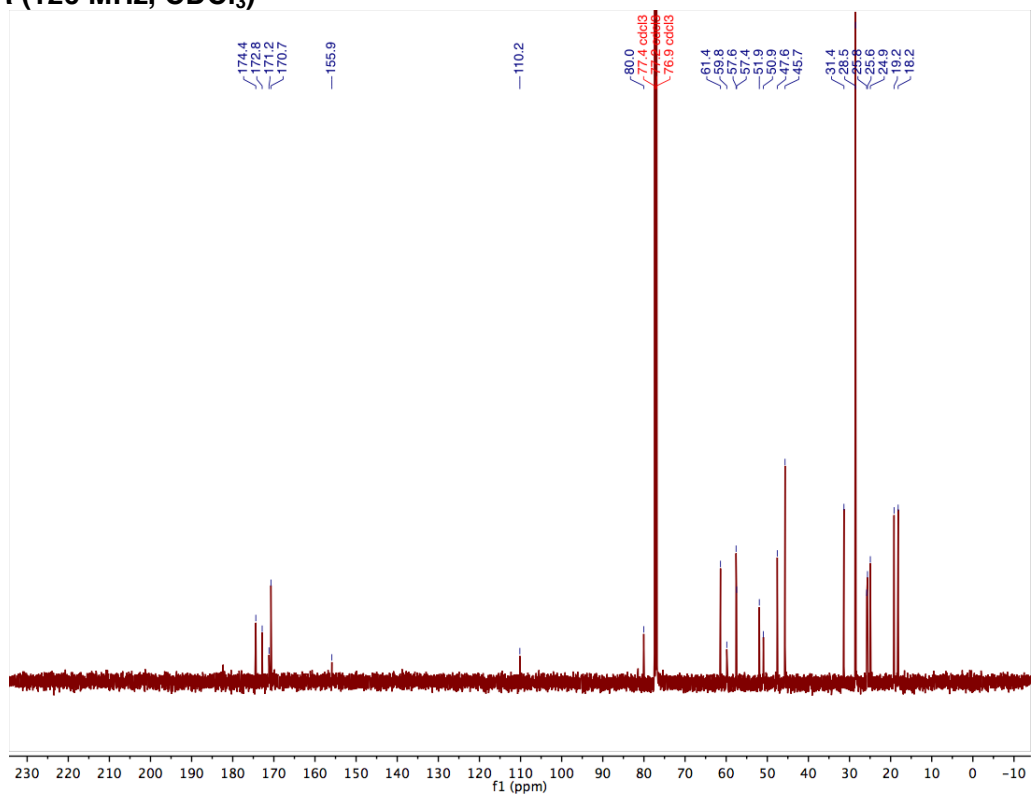

**Peptide 27**

**<sup>1</sup>H-NMR (600 MHz, CDCl<sub>3</sub>)**

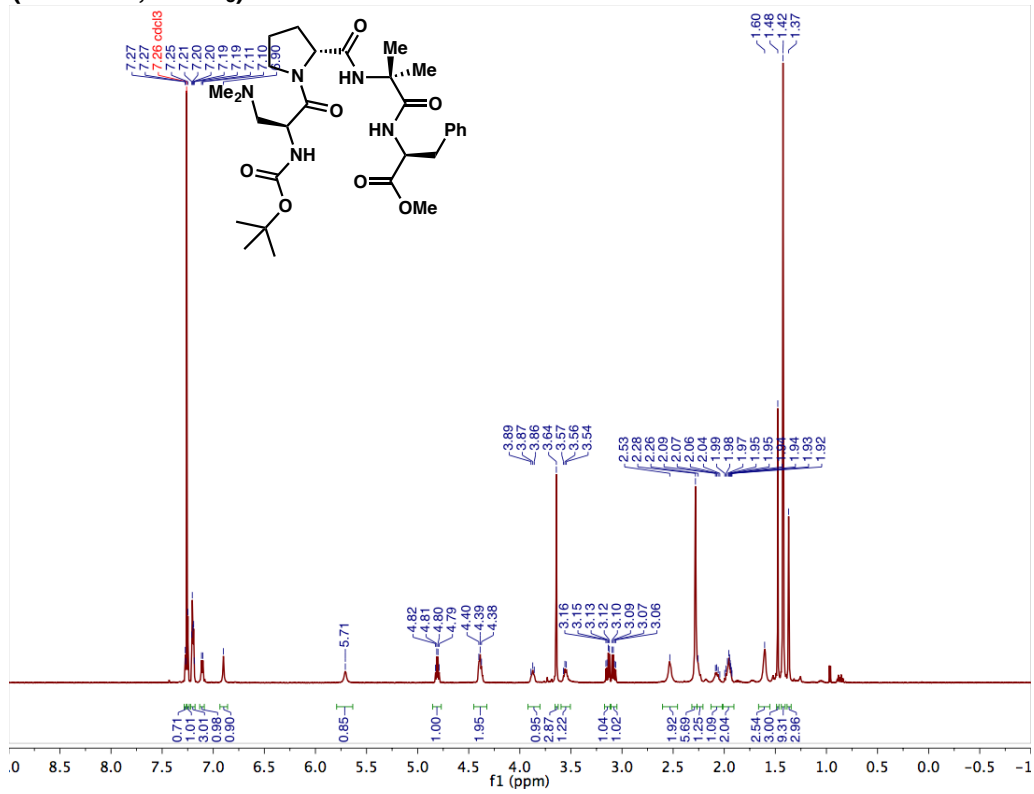

**<sup>13</sup>C-NMR (151 MHz, CDCl<sub>3</sub>)**

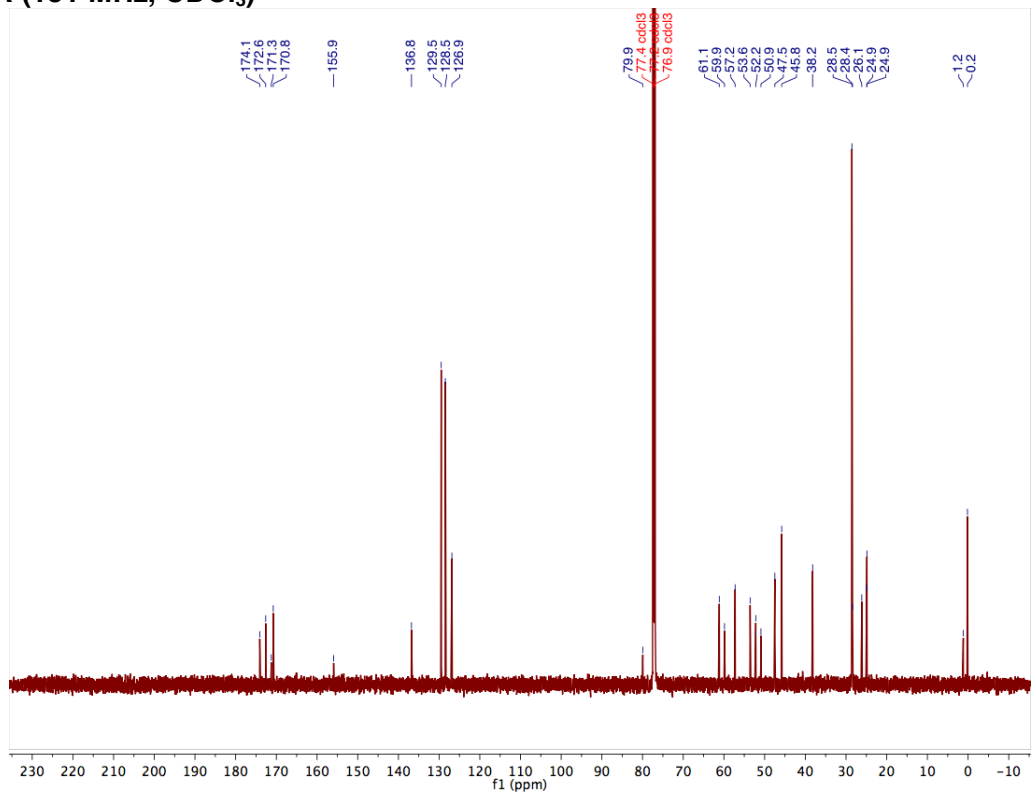

**Peptide 28**

**<sup>1</sup>H-NMR (500 MHz, CDCl<sub>3</sub>)**

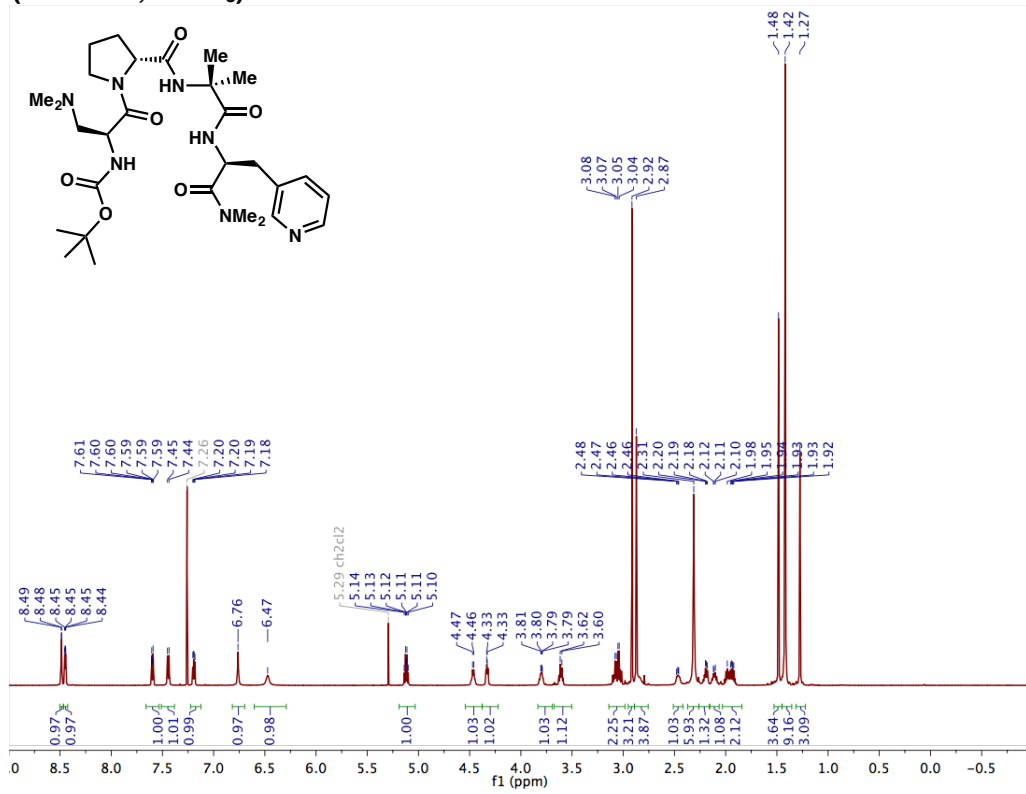

**<sup>13</sup>C-NMR (126 MHz, CDCl<sub>3</sub>)**

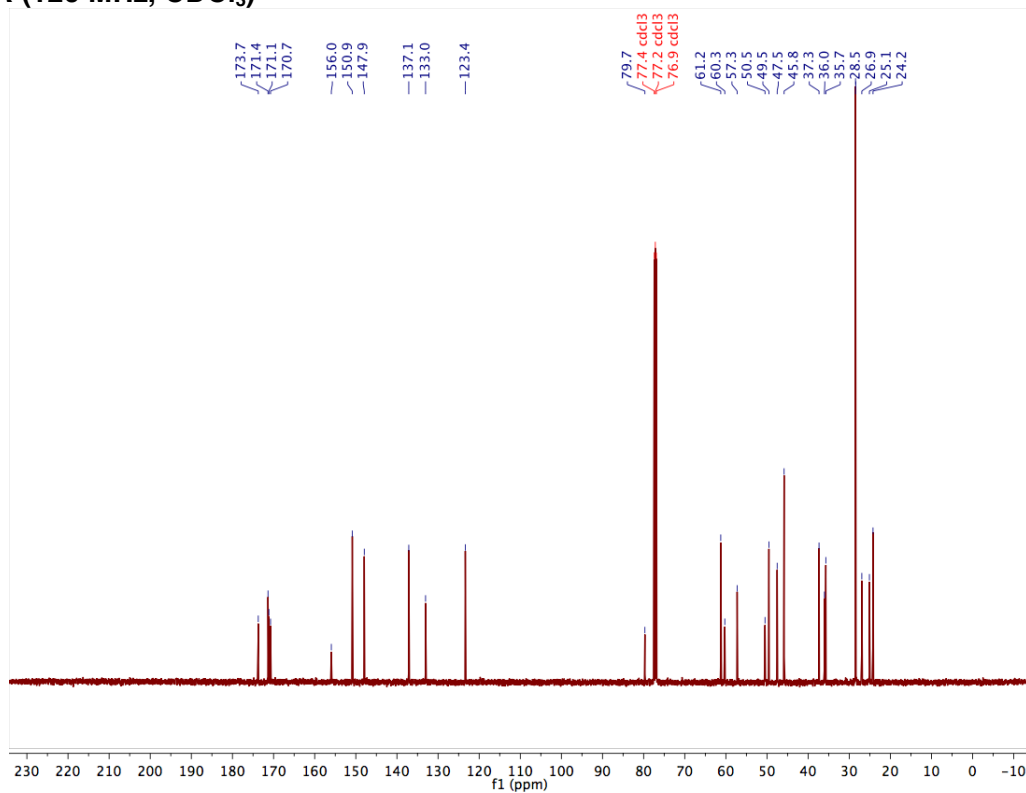





**Peptide 31**

**<sup>1</sup>H-NMR (600 MHz, CDCl<sub>3</sub>)**

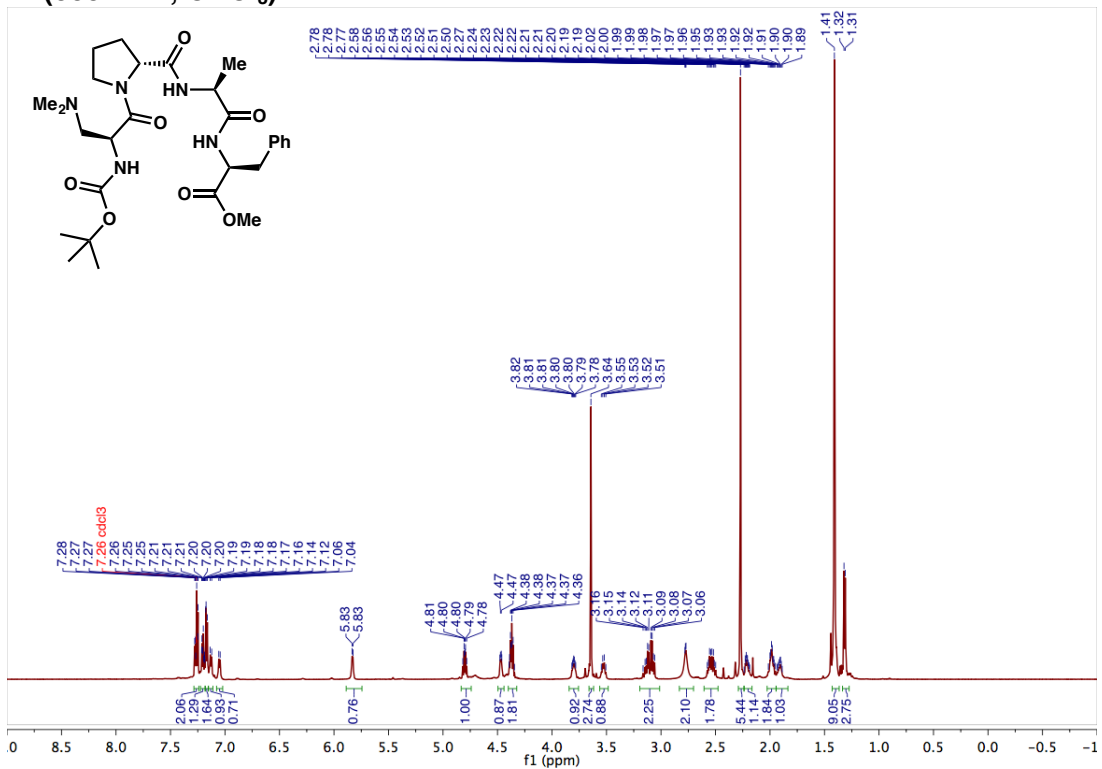

**<sup>13</sup>C-NMR (151 MHz, CDCl<sub>3</sub>)**

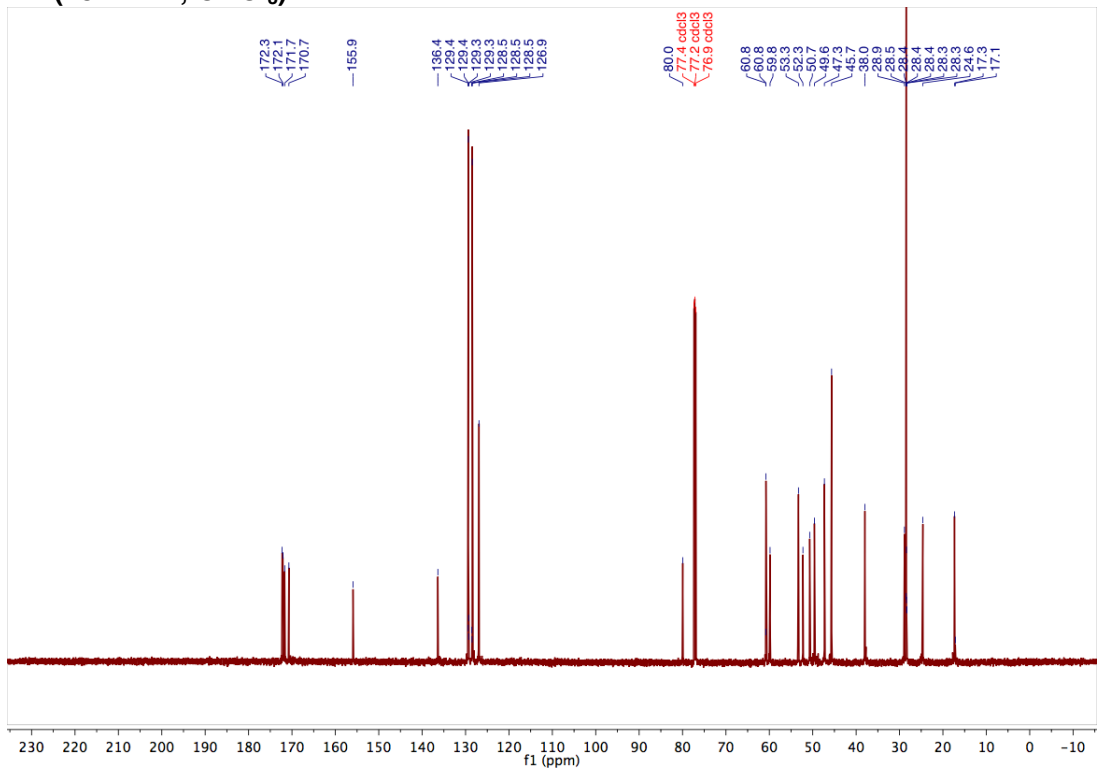







### III. Crystallographic Information

#### A. Experimental

Low-temperature diffraction data ( $\omega$ -scans) were collected on a Rigaku MicroMax-007HF diffractometer coupled to a Saturn994+ CCD detector with Cu K $\alpha$  ( $\lambda = 1.54178 \text{ \AA}$ ) for the structures of peptides **3**, **6–11**, **13–15**, **17–20**, **22**, **24**, **26–30**, and **33**. The diffraction images were processed and scaled using the Rigaku CrystalClear software.<sup>12</sup> For the structures of peptides **4**, **5**, **12**, **16**, **21**, **23**, **25**, **31**, and **32**, low-temperature diffraction data ( $\omega$ -scans) were collected at the Advanced Light Source, Lawrence Berkeley National Laboratory on a Bruker D8 goniometer coupled to a PHOTON 100 detector with synchrotron radiation ( $\lambda = 0.7749 \text{ \AA}$ ). The data were integrated with the APEX2 software package and absorption-corrected with SADABS.<sup>13</sup> All structures were solved with SHELXT and refined against  $F^2$  on all data by full-matrix least squares with SHELXL.<sup>14</sup> All non-hydrogen atoms were refined anisotropically. Unless noted otherwise, hydrogen atoms were included in the model at geometrically calculated positions and refined using a riding model. The isotropic displacement parameters of all hydrogen atoms were fixed to 1.2 times the U-value of the atoms to which they are bonded (1.5 times for methyl groups). Full numbering schemes and additional refinement details for all of the peptides can be found in the crystallographic information files (.cif), which are provided as supplementary information. The CCDC numbers for all compounds are provided in Table S3.01, which are linked to the supplementary crystallographic data for this paper. These data can be obtained free of charge from The Cambridge Crystallographic Data Centre *via* the following web link: [http://www.ccdc.cam.ac.uk/data\\_request/cif](http://www.ccdc.cam.ac.uk/data_request/cif).

X-Ray crystal structures were rendered using CYLview,<sup>15</sup> and structure overlays were calculated and rendered using the “structure overlay” and “molecule overlay” features of Mercury 3.8.<sup>16</sup> Three different types of structure overlays are used throughout the manuscript—loop, backbone, and all-atom. Loop overlays were accomplished using the “structure overlay” feature specifying  $N(i+1)-C\alpha(i+1)-C'(i+1)-N(i+2)-C\alpha(i+2)-C'(i+2)$ , the loop atoms, as the atoms to be overlaid. Backbone overlays were also accomplished using the “structure overlay” feature, specifying all of the backbone/main-chain atoms (excluding those on the *N*-terminal Boc-group and the *C*-terminal cap (methyl ester or *N,N*-dimethyl amide). All-atom overlays were accomplished using the “molecule overlay” feature. Overlays of all three types are reported with a corresponding RMSD value.

**Table S3.01: Peptide Information**

| Peptide Sequence                                         | #     | MF                                                              | MW<br>(g/mol) | Crystallization  |                                 |        | Facility<br>Code | CCDC #  | $\beta$ -Turn Motif      |
|----------------------------------------------------------|-------|-----------------------------------------------------------------|---------------|------------------|---------------------------------|--------|------------------|---------|--------------------------|
|                                                          |       |                                                                 |               | Method           | Sample Solvent                  | Temp   |                  |         |                          |
| Boc-Dmaa-D-Pro-Acpc-Leu-NMe <sub>2</sub>                 | 3a,b  | C <sub>27</sub> H <sub>48</sub> N <sub>6</sub> O <sub>6</sub>   | 552.72        | vapor diffusion  | EtOAc/pentane                   | rt     | 007-15050        | 1412920 | type II' hairpins        |
| Boc-Dmaa-D-Pro-Acpc-Leu-NMe <sub>2</sub>                 | 3c    | C <sub>27</sub> H <sub>48</sub> N <sub>6</sub> O <sub>6</sub>   | 552.72        | vapor diffusion  | EtOAc/pentane                   | rt     | 007-15126        | 1453125 | type II' hairpin         |
| Boc-Dmaa-D-Pro-Acpc-Leu-OMe                              | 4a    | C <sub>26</sub> H <sub>45</sub> N <sub>5</sub> O <sub>7</sub>   | 539.67        | vapor diffusion  | EtOAc/pentane                   | rt     | 007-15146        | 1453124 | type I' pre-helical      |
| Boc-Dmaa-D-Pro-Acpc-Leu-OMe                              | 4b-e  | C <sub>26</sub> H <sub>45</sub> N <sub>5</sub> O <sub>7</sub>   | 539.67        | vapor diffusion  | EtOAc/pentane                   | rt     | ALS-16027        | 1510507 | type I' pre-helical      |
| Boc-Cys(Ph)-D-Pro-Acpc-Leu-OMe                           | 5     | C <sub>30</sub> H <sub>44</sub> N <sub>4</sub> O <sub>7</sub> S | 604.76        | vapor diffusion  | EtOAc/pentane                   | rt     | SJM-19           | 1510503 | type I' pre-helical      |
| Boc-Leu-D-Pro-Acpc-Leu-OMe                               | 6     | C <sub>27</sub> H <sub>46</sub> N <sub>4</sub> O <sub>7</sub>   | 538.69        | vapor diffusion  | THF/pentane                     | rt     | 007-16093        | 1510502 | type II' hairpin         |
| Boc-Dmaa-D-Pro-Acpc-Gly-OMe                              | 7a,b  | C <sub>22</sub> H <sub>37</sub> N <sub>5</sub> O <sub>7</sub>   | 483.57        | vapor diffusion  | EtOAc/pentane                   | rt     | 007-15028        | 1510506 | types II'/I' pre-helical |
| Boc-Dmaa-D-Pro-Acpc-Nle-NMe <sub>2</sub>                 | 8     | C <sub>27</sub> H <sub>46</sub> N <sub>6</sub> O <sub>6</sub>   | 552.72        | vapor diffusion  | EtOAc/pentane                   | rt     | 007-15071        | 1510504 | type II' hairpin         |
| Boc-Dmaa-D-Pro-Acpc-Val-NMe <sub>2</sub>                 | 9     | C <sub>26</sub> H <sub>46</sub> N <sub>6</sub> O <sub>6</sub>   | 538.69        | vapor diffusion  | EtOAc/pentane                   | rt     | 007-15070        | 1510505 | type II' hairpin         |
| Boc-Dmaa-D-Pro-Acpc-Val-OMe                              | 10    | C <sub>25</sub> H <sub>43</sub> N <sub>5</sub> O <sub>7</sub>   | 525.65        | vapor diffusion  | EtOAc/pentane                   | rt     | 007-15121        | 1510508 | type I' pre-helical      |
| Boc-Dmaa-D-Pro-Acpc-Chg-NMe <sub>2</sub>                 | 11    | C <sub>29</sub> H <sub>50</sub> N <sub>6</sub> O <sub>6</sub>   | 578.76        | vapor diffusion  | EtOAc/pentane                   | rt     | 007-15102        | 1510516 | type II' hairpin         |
| Boc-Dmaa-D-Pro-Acpc-Phe-NMe <sub>2</sub>                 | 12    | C <sub>30</sub> H <sub>46</sub> N <sub>6</sub> O <sub>6</sub>   | 586.73        | vapor diffusion  | EtOAc/pentane                   | rt     | SJM16            | 1510513 | type I' pre-helical      |
| Boc-Dmaa-D-Pro-Acpc-Phe-OMe                              | 13    | C <sub>29</sub> H <sub>43</sub> N <sub>5</sub> O <sub>7</sub>   | 573.69        | vapor diffusion  | EtOAc/hexanes                   | rt     | 007-15129        | 1510509 | type II' hairpin         |
| Boc-Dmaa-D-Pro-Acpc-D-Phe-NMe <sub>2</sub>               | 14    | C <sub>30</sub> H <sub>46</sub> N <sub>6</sub> O <sub>6</sub>   | 586.73        | vapor diffusion  | EtOAc/pentane                   | rt     | 007-15058        | 1510514 | type II' hairpin         |
| Boc-Dmaa-Pro-Acpc-Leu-OMe                                | 15    | C <sub>26</sub> H <sub>45</sub> N <sub>5</sub> O <sub>7</sub>   | 539.67        | vapor diffusion  | EtOAc/pentane                   | rt     | 007-15158        | 1510510 | type II hairpin          |
| Boc-Dmaa-D-Pro-Acbc-Leu-NMe <sub>2</sub>                 | 16a,b | C <sub>28</sub> H <sub>50</sub> N <sub>6</sub> O <sub>6</sub>   | 566.74        | vapor diffusion  | EtOAc/pentane                   | rt     | 007-16060        | 1510512 | type II' hairpins        |
| Boc-Dmaa-D-Pro-Acbc-Leu-NMe <sub>2</sub>                 | 16c   | C <sub>28</sub> H <sub>50</sub> N <sub>6</sub> O <sub>6</sub>   | 566.74        | vapor diffusion  | EtOAc/pentane                   | rt     | ALS-16026        | 1510511 | type I' pre-helical      |
| Boc-Dmaa-D-Pro-Acbc-Leu-OMe                              | 17a,b | C <sub>27</sub> H <sub>47</sub> N <sub>5</sub> O <sub>7</sub>   | 553.70        | vapor diffusion  | EtOAc/pentane                   | rt     | 007-16055        | 1510515 | type I' pre-helical      |
| Boc-Dmaa-D-Pro-Cle-Leu-OMe                               | 18a,b | C <sub>28</sub> H <sub>48</sub> N <sub>5</sub> O <sub>7</sub>   | 567.73        | vapor diffusion  | EtOAc/pentane                   | rt     | 007-16087        | 1510517 | type I' pre-helical      |
| Boc-Dmaa-D-Pro-Aic-Leu-OMe                               | 19a,b | C <sub>32</sub> H <sub>48</sub> N <sub>5</sub> O <sub>7</sub>   | 615.77        | vapor diffusion  | THF/pentane                     | rt     | 007-16091        | 1510525 | type I' pre-helical      |
| Boc-Dmaa-D-Pro-Aic-D-Phe-NMe <sub>2</sub>                | 20a,b | C <sub>36</sub> H <sub>50</sub> N <sub>6</sub> O <sub>6</sub>   | 662.83        | vapor diffusion  | EtOAc/pentane                   | rt     | 007-15115        | 1510518 | type II'                 |
| Boc-Dmaa-Pro-Aic-Leu-OMe                                 | 21a,b | C <sub>32</sub> H <sub>48</sub> N <sub>5</sub> O <sub>7</sub>   | 615.77        | vapor diffusion  | EtOAc/pentane                   | rt     | SJM15            | 1510519 | type II                  |
| Boc-Dmaa-D-Pro-Achc-Leu-OMe                              | 22a,b | C <sub>29</sub> H <sub>51</sub> N <sub>5</sub> O <sub>7</sub>   | 581.76        | vapor diffusion  | EtOAc/pentane                   | rt     | 007-16083        | 1510522 | type I' pre-helical      |
| Boc-Cys(Ph)-D-Pro-Achc-Leu-OMe                           | 23    | C <sub>33</sub> H <sub>50</sub> N <sub>4</sub> O <sub>7</sub> S | 646.84        | vapor diffusion  | EtOAc/pentane                   | rt     | SJM23            | 1510526 | type I' pre-helical      |
| Boc-Dmaa-D-Pro-Aib-Leu-NMe <sub>2</sub>                  | 24    | C <sub>27</sub> H <sub>50</sub> N <sub>6</sub> O <sub>6</sub>   | 554.73        | vapor diffusion  | EtOAc/pentane                   | rt     | 007-16092        | 1510521 | type II' hairpin         |
| Boc-Dmaa-D-Pro-Aib-Leu-OMe                               | 25    | C <sub>26</sub> H <sub>47</sub> N <sub>5</sub> O <sub>7</sub>   | 541.69        | vapor diffusion  | EtOAc/pentane                   | rt     | SJM17            | 1510520 | type II' hairpin         |
| Boc-Dmaa-D-Pro-Aib-Val-OMe                               | 26    | C <sub>25</sub> H <sub>45</sub> N <sub>5</sub> O <sub>7</sub>   | 527.66        | vapor diffusion  | EtOAc/pentane                   | rt     | 007-16004        | 1510524 | type II' hairpin         |
| Boc-Dmaa-D-Pro-Aib-Phe-OMe                               | 27    | C <sub>29</sub> H <sub>45</sub> N <sub>5</sub> O <sub>7</sub>   | 575.71        | vapor diffusion  | Et <sub>2</sub> O/hexanes       | rt     | 007-15168        | 1510523 | type II' hairpin         |
| Boc-Dmaa-D-Pro-Aib-3-Pal-NMe <sub>2</sub>                | 28    | C <sub>29</sub> H <sub>47</sub> N <sub>7</sub> O <sub>6</sub>   | 589.74        | vapor diffusion  | EtOAc/pentane                   | rt     | 007-15136        | 1510530 | type II' hairpin         |
| Boc-Dmaa-D-Pro-Aib-2-Thi-NMe <sub>2</sub>                | 29a,b | C <sub>28</sub> H <sub>46</sub> N <sub>6</sub> O <sub>6</sub> S | 594.77        | vapor diffusion  | EtOAc/pentane                   | rt     | 007-15145        | 1510527 | type II' hairpins        |
| Boc-Dmaa-Pro-Aib-Leu-OMe                                 | 30    | C <sub>26</sub> H <sub>47</sub> N <sub>5</sub> O <sub>7</sub>   | 541.69        | vapor diffusion  | EtOAc/pentane                   | rt     | 007-15152        | 1510531 | type II                  |
| Boc-Dmaa-D-Pro-Ala-Phe-OMe                               | 31    | C <sub>25</sub> H <sub>43</sub> N <sub>5</sub> O <sub>7</sub>   | 561.68        | vapor diffusion  | EtOAc/pentane                   | rt     | SJM5             | 1510528 | type II' hairpin         |
| Boc-Dmaa-D-Pro-Phe-Leu-NMe <sub>2</sub>                  | 32a,b | C <sub>32</sub> H <sub>42</sub> N <sub>6</sub> O <sub>6</sub>   | 616.80        | vapor diffusion  | EtOAc/pentane                   | rt     | SJM21            | 1510529 | unfolded                 |
| Boc-Dmaa-D-Pro-Gly-Leu-OMe                               | 33a,b | C <sub>24</sub> H <sub>43</sub> N <sub>5</sub> O <sub>7</sub>   | 513.64        | vapor diffusion  | PhMe/pentane                    | rt     | 007-16123        | 1510532 | type I' pre-helical      |
| Boc-Keto-D-Pro-Aib-Phe-NMe <sub>2</sub>                  | 34    | C <sub>30</sub> H <sub>44</sub> N <sub>4</sub> O <sub>8</sub>   | 588.70        | slow evaporation | CHCl <sub>3</sub>               | rt     | JTB55t           | 604845  | type II' hairpin         |
| Boc-Phe-Pro-Aib-( <i>R</i> )- $\alpha$ -Mba              | 35    | C <sub>31</sub> H <sub>42</sub> N <sub>4</sub> O <sub>5</sub>   | 550.70        | slow evaporation | CHCl <sub>3</sub>               | -20 °C | final            | 147004  | type II                  |
| 2-Msa-Pro-D-Val-( <i>R</i> )- $\alpha$ -Mba              | 36    | C <sub>22</sub> H <sub>31</sub> N <sub>3</sub> O <sub>5</sub>   | 417.51        | slow evaporation | CH <sub>2</sub> Cl <sub>2</sub> | rt     | cj02             | 687520  | type II                  |
| Boc-His( $\tau$ -Bn)-Pro-Aib-( <i>R</i> )- $\alpha$ -Mba | 37    | C <sub>35</sub> H <sub>46</sub> N <sub>6</sub> O <sub>5</sub>   | 630.79        | slow evaporation | CHCl <sub>3</sub>               | rt     | djg280t          | 147003  | type I Pro-ASX           |

**Table S3.02: Details of X-Ray Crystal Structures 3a–c, 4a–e, and 5**

| Compound                                                | 3a,b <sup>4,5</sup>                                             | 3c <sup>5</sup>                                               | 4a <sup>5</sup>                                               | 4b–e                                                          | 5                                                               |
|---------------------------------------------------------|-----------------------------------------------------------------|---------------------------------------------------------------|---------------------------------------------------------------|---------------------------------------------------------------|-----------------------------------------------------------------|
| Data Code                                               | 007-15050                                                       | 007-15126                                                     | 007-15146                                                     | ALS-16027                                                     | SJM19                                                           |
| Empirical Formula                                       | C <sub>27</sub> H <sub>49</sub> N <sub>6</sub> O <sub>6.5</sub> | C <sub>27</sub> H <sub>48</sub> N <sub>6</sub> O <sub>6</sub> | C <sub>26</sub> H <sub>45</sub> N <sub>5</sub> O <sub>7</sub> | C <sub>26</sub> H <sub>45</sub> N <sub>5</sub> O <sub>7</sub> | C <sub>30</sub> H <sub>44</sub> N <sub>4</sub> O <sub>7</sub> S |
| Temperature (K)                                         | 93(2)                                                           | 93(2)                                                         | 228(2)                                                        | 100(2)                                                        | 100(2) K                                                        |
| Wavelength (Å)                                          | 1.54187                                                         | 1.54187                                                       | 1.54187                                                       | 0.7749                                                        | 0.7749                                                          |
| FW                                                      | 561.72                                                          | 552.71                                                        | 538.66                                                        | 539.67                                                        | 604.75                                                          |
| Crystal System                                          | Monoclinic                                                      | Orthorhombic                                                  | Orthorhombic                                                  | Triclinic                                                     | Orthorhombic                                                    |
| Space Group                                             | <i>P</i> 2 <sub>1</sub>                                         | <i>P</i> 2 <sub>1</sub> 2 <sub>1</sub>                        | <i>P</i> 2 <sub>1</sub> 2 <sub>1</sub>                        | <i>P</i> 1                                                    | <i>P</i> 2 <sub>1</sub> 2 <sub>1</sub>                          |
| <i>a</i> (Å)                                            | 16.1717(11)                                                     | 11.7899(8)                                                    | 11.9360(8)                                                    | 11.9119(13)                                                   | 14.0134(6)                                                      |
| <i>b</i> (Å)                                            | 9.364(6)                                                        | 15.9908(11)                                                   | 16.0501(11)                                                   | 15.6190(17)                                                   | 21.2939(9) Å                                                    |
| <i>c</i> (Å)                                            | 21.5606(15)                                                     | 16.3363(11)                                                   | 16.5597(12)                                                   | 16.4598(17)                                                   | 11.1225(4)                                                      |
| α (°)                                                   | 90                                                              | 90                                                            | 90                                                            | 86.532(2)                                                     | 90                                                              |
| β (°)                                                   | 104.7162(2)                                                     | 90                                                            | 90                                                            | 89.527(2)                                                     | 90                                                              |
| γ (°)                                                   | 90                                                              | 90                                                            | 90                                                            | 88.976(2)                                                     | 90                                                              |
| <i>V</i> (Å <sup>3</sup> )                              | 3157.9(4)                                                       | 3079.9(4)                                                     | 3172.4(4)                                                     | 3056.2(6)                                                     | 3319.0(2) Å <sup>3</sup>                                        |
| <i>Z</i>                                                | 4                                                               | 4                                                             | 4                                                             | 4                                                             | 4                                                               |
| ρ (mg/m <sup>3</sup> )                                  | 1.181                                                           | 1.192                                                         | 1.128                                                         | 1.173                                                         | 1.210                                                           |
| μ (mm <sup>-1</sup> )                                   | 0.693                                                           | 0.691                                                         | 0.676                                                         | 0.104                                                         | 0.179                                                           |
| Flack Parameter                                         | −0.04(15)                                                       | 0.01(4)                                                       | −0.01(3)                                                      | −0.2(6)                                                       | 0.09(3)                                                         |
| <i>R</i> 1, <i>wR</i> 2<br>( <i>I</i> > 2σ( <i>I</i> )) | 0.0651, 0.1665                                                  | 0.0287, 0.0784                                                | 0.0504, 0.1454                                                | 0.0526, 0.1115                                                | 0.0416, 0.1062                                                  |
| <i>R</i> 1, <i>wR</i> 2<br>(all data)                   | 0.0982, 0.1864                                                  | 0.0307, 0.0792                                                | 0.0534, 0.1513                                                | 0.0810, 0.1219                                                | 0.0458, 0.1082                                                  |
| GOF                                                     | 1.023                                                           | 1.060                                                         | 1.023                                                         | 1.063                                                         | 1.138                                                           |
| Largest Diff. Peak, Hole<br>(e Å <sup>-3</sup> )        | 0.760, 0.285                                                    | 0.274, −0.166                                                 | 0.280, −0.190                                                 | 0.570, −0.241                                                 | 0.362, −0.255                                                   |

**Table S3.03: Details of X-Ray Crystal Structures 6–7a,b and 8–10**

| Compound                                                | 6                                                             | 7a,b                                                          | 8                                                             | 9                                                             | 10                                                            |
|---------------------------------------------------------|---------------------------------------------------------------|---------------------------------------------------------------|---------------------------------------------------------------|---------------------------------------------------------------|---------------------------------------------------------------|
| Data Code                                               | 007-16093                                                     | 007-15028                                                     | 007-15071                                                     | 007-15070                                                     | 007-15121                                                     |
| Empirical Formula                                       | C <sub>27</sub> H <sub>46</sub> N <sub>4</sub> O <sub>7</sub> | C <sub>22</sub> H <sub>37</sub> N <sub>5</sub> O <sub>7</sub> | C <sub>27</sub> H <sub>48</sub> N <sub>6</sub> O <sub>6</sub> | C <sub>26</sub> H <sub>46</sub> N <sub>6</sub> O <sub>6</sub> | C <sub>25</sub> H <sub>43</sub> N <sub>5</sub> O <sub>7</sub> |
| Temperature (K)                                         | 93(2)                                                         | 93(2)                                                         | 93(2)                                                         | 93(2)                                                         | 93(2)                                                         |
| Wavelength (Å)                                          | 1.54178                                                       | 1.54187                                                       | 1.54187                                                       | 1.54187                                                       | 1.54187                                                       |
| FW                                                      | 538.68                                                        | 483.56                                                        | 552.71                                                        | 525.64                                                        | 525.64                                                        |
| Crystal System                                          | Monoclinic                                                    | Monoclinic                                                    | Orthorhombic                                                  | Orthorhombic                                                  | Orthorhombic                                                  |
| Space Group                                             | <i>P</i> 2 <sub>1</sub>                                       | <i>P</i> 2 <sub>1</sub>                                       | <i>P</i> 2 <sub>1</sub> 2 <sub>1</sub> 2 <sub>1</sub>         | <i>P</i> 2 <sub>1</sub> 2 <sub>1</sub> 2 <sub>1</sub>         | <i>P</i> 2 <sub>1</sub> 2 <sub>1</sub> 2 <sub>1</sub>         |
| <i>a</i> (Å)                                            | 12.0174(8)                                                    | 9.8381(2)                                                     | 9.7541(7)                                                     | 9.4965(7)                                                     | 11.7505(8)                                                    |
| <i>b</i> (Å)                                            | 9.4647(7)                                                     | 10.3396(2)                                                    | 10.7355(8)                                                    | 10.4398(7)                                                    | 15.3610(11)                                                   |
| <i>c</i> (Å)                                            | 13.6217(10)                                                   | 25.5626(18)                                                   | 29.430(2)                                                     | 31.132(2)                                                     | 16.1615(11)                                                   |
| α (°)                                                   | 90                                                            | 90                                                            | 90                                                            | 90                                                            | 90                                                            |
| β (°)                                                   | 106.691(3)                                                    | 97.525(7)                                                     | 90                                                            | 90                                                            | 90                                                            |
| γ (°)                                                   | 90                                                            | 90                                                            | 90                                                            | 90                                                            | 90                                                            |
| <i>V</i> (Å <sup>3</sup> )                              | 1484.07(18)                                                   | 2577.9(2)                                                     | 3081.7(4)                                                     | 3086.5(4)                                                     | 2917.1(4)                                                     |
| <i>Z</i>                                                | 2                                                             | 4                                                             | 4                                                             | 4                                                             | 4                                                             |
| ρ (mg/m <sup>3</sup> )                                  | 1.205                                                         | 1.246                                                         | 1.191                                                         | 1.159                                                         | 1.197                                                         |
| μ (mm <sup>-1</sup> )                                   | 0.711                                                         | 0.775                                                         | 0.691                                                         | 0.678                                                         | 0.722                                                         |
| Flack Parameter                                         | 0.00(11)                                                      | −0.01(5)                                                      | 0.02(2)                                                       | 0.01(6)                                                       | 0.01(2)                                                       |
| <i>R</i> 1, <i>wR</i> 2<br>( <i>I</i> > 2σ( <i>I</i> )) | 0.0387, 0.0848                                                | 0.0433, 0.1104                                                | 0.0239, 0.0667                                                | 0.0320, 0.0751                                                | 0.0244, 0.0630                                                |
| <i>R</i> 1, <i>wR</i> 2<br>(all data)                   | 0.0518, 0.0918                                                | 0.0470, 0.1137                                                | 0.0255, 0.0737                                                | 0.0375, 0.0764                                                | 0.0251, 0.0635                                                |
| GOF                                                     | 1.020                                                         | 1.047                                                         | 1.148                                                         | 1.025                                                         | 1.043                                                         |
| Largest Diff. Peak, Hole<br>(e Å <sup>-3</sup> )        | 0.260, −0.159                                                 | 0.257, −0.251                                                 | 0.225, −0.258                                                 | 0.277, −0.335                                                 | 0.192, −0.138                                                 |

**Table S3.04: Details of X-Ray Crystal Structures 11–15**

| Compound                                                      | 11                                                            | 12                                                            | 13                                                            | 14                                                            | 15                                                            |
|---------------------------------------------------------------|---------------------------------------------------------------|---------------------------------------------------------------|---------------------------------------------------------------|---------------------------------------------------------------|---------------------------------------------------------------|
| Data Code                                                     | 007-15102                                                     | SJM16                                                         | 007-15129                                                     | 007-15058                                                     | 007-15158                                                     |
| Empirical Formula                                             | C <sub>29</sub> H <sub>50</sub> N <sub>6</sub> O <sub>6</sub> | C <sub>30</sub> H <sub>46</sub> N <sub>6</sub> O <sub>6</sub> | C <sub>29</sub> H <sub>43</sub> N <sub>5</sub> O <sub>7</sub> | C <sub>30</sub> H <sub>46</sub> N <sub>6</sub> O <sub>6</sub> | C <sub>26</sub> H <sub>45</sub> N <sub>5</sub> O <sub>7</sub> |
| Temperature (K)                                               | 93(2)                                                         | 100(2)                                                        | 93(2)                                                         | 93(2)                                                         | 93(2)                                                         |
| Wavelength (Å)                                                | 1.54178                                                       | 1.512                                                         | 1.54178                                                       | 1.54178                                                       | 1.54178                                                       |
| FW                                                            | 578.75                                                        | 586.73                                                        | 573.68                                                        | 586.73                                                        | 539.67                                                        |
| Crystal System                                                | Orthorhombic                                                  | Orthorhombic                                                  | Monoclinic                                                    | Monoclinic                                                    | Monoclinic                                                    |
| Space Group                                                   | <i>P</i> 2 <sub>1</sub> 2 <sub>1</sub> 2 <sub>1</sub>         | <i>P</i> 2 <sub>1</sub> 2 <sub>1</sub> 2 <sub>1</sub>         | <i>P</i> 2 <sub>1</sub>                                       | <i>P</i> 2 <sub>1</sub>                                       | <i>P</i> 2 <sub>1</sub>                                       |
| <i>a</i> (Å)                                                  | 9.6852(7)                                                     | 9.5116(4)                                                     | 10.6027(7)                                                    | 11.0991(3)                                                    | 9.9289(7)                                                     |
| <i>b</i> (Å)                                                  | 10.7444(8)                                                    | 10.8943(4)                                                    | 8.8911(6)                                                     | 9.2550(3)                                                     | 14.2705(10)                                                   |
| <i>c</i> (Å)                                                  | 31.296(2)                                                     | 30.9331(11)                                                   | 15.9646(11)                                                   | 16.0095(11)                                                   | 11.0675(8)                                                    |
| $\alpha$ (°)                                                  | 90                                                            | 90                                                            | 90                                                            | 90                                                            | 90                                                            |
| $\beta$ (°)                                                   | 90                                                            | 90                                                            | 97.122(2)                                                     | 100.869(7)                                                    | 98.876(7)                                                     |
| $\gamma$ (°)                                                  | 90                                                            | 90                                                            | 90                                                            | 90                                                            | 90                                                            |
| <i>V</i> (Å <sup>3</sup> )                                    | 3256.8(4)                                                     | 3205.4(2)                                                     | 1493.37(17)                                                   | 1615.03(14)                                                   | 1549.38(19)                                                   |
| <i>Z</i>                                                      | 4                                                             | 4                                                             | 2                                                             | 2                                                             | 2                                                             |
| $\rho$ (mg/m <sup>3</sup> )                                   | 1.180                                                         | 1.216                                                         | 1.276                                                         | 1.207                                                         | 1.157                                                         |
| $\mu$ (mm <sup>-1</sup> )                                     | 0.676                                                         | 0.632                                                         | 0.754                                                         | 0.692                                                         | 0.692                                                         |
| Flack Parameter                                               | 0.18(6)                                                       | -0.03(4)                                                      | -0.07(4)                                                      | 0.06(11)                                                      | 0.03(9)                                                       |
| <i>R</i> 1, <i>wR</i> 2 ( <i>I</i> > 2 $\sigma$ ( <i>I</i> )) | 0.0419, 0.0990                                                | 0.0309, 0.0777                                                | 0.0252, 0.0630                                                | 0.0441, 0.1039                                                | 0.0611, 0.1615                                                |
| <i>R</i> 1, <i>wR</i> 2 (all data)                            | 0.0502, 0.1044                                                | 0.0317, 0.0782                                                | 0.0262, 0.0635                                                | 0.0507, 0.1137                                                | 0.0656, 0.1675                                                |
| GOF                                                           | 1.047                                                         | 1.054                                                         | 1.045                                                         | 1.103                                                         | 1.050                                                         |
| Largest Diff. Peak, Hole (e Å <sup>-3</sup> )                 | 0.359, -0.353                                                 | 0.169, -0.207                                                 | 0.103, -0.146                                                 | 0.262, -0.246                                                 | 0.623, -0.424                                                 |

**Table S3.05: Details of X-Ray Crystal Structures 16a–c, 17a,b, 18a,b, and 19a,b**

| Compound                                                | 16a,b                                                                        | 16c                                                           | 17a,b                                                         | 18a,b                                                         | 19a,b                                                            |
|---------------------------------------------------------|------------------------------------------------------------------------------|---------------------------------------------------------------|---------------------------------------------------------------|---------------------------------------------------------------|------------------------------------------------------------------|
| Data Code                                               | 007-16060                                                                    | ALS-16026                                                     | 007-16055                                                     | 007-16087                                                     | 007-16091                                                        |
| Empirical Formula                                       | C <sub>29.25</sub> H <sub>54.50</sub> Cl<br>N <sub>6</sub> O <sub>6.25</sub> | C <sub>28</sub> H <sub>50</sub> N <sub>6</sub> O <sub>6</sub> | C <sub>27</sub> H <sub>47</sub> N <sub>5</sub> O <sub>7</sub> | C <sub>28</sub> H <sub>49</sub> N <sub>5</sub> O <sub>7</sub> | C <sub>34</sub> H <sub>53</sub> N <sub>5</sub> O <sub>7.50</sub> |
| Temperature (K)                                         | 93(2)                                                                        | 100(2)                                                        | 93(2)                                                         | 93(2)                                                         | 93(2)                                                            |
| Wavelength (Å)                                          | 1.54178                                                                      | 0.7749                                                        | 1.54178                                                       | 1.54178                                                       | 1.54178                                                          |
| FW                                                      | 625.74                                                                       | 566.74                                                        | 553.69                                                        | 567.72                                                        | 651.81                                                           |
| Crystal System                                          | Monoclinic                                                                   | Orthorhombic                                                  | Monoclinic                                                    | Monoclinic                                                    | Orthorhombic                                                     |
| Space Group                                             | <i>C</i> <sub>2</sub>                                                        | <i>P</i> 2 <sub>1</sub> 2 <sub>1</sub> 2 <sub>1</sub>         | <i>P</i> 2 <sub>1</sub>                                       | <i>P</i> 2 <sub>1</sub>                                       | <i>P</i> 2 <sub>1</sub> 2 <sub>1</sub> 2 <sub>1</sub>            |
| <i>a</i> (Å)                                            | 27.2814(19)                                                                  | 12.4001(19)                                                   | 11.7452(8)                                                    | 11.7165(8)                                                    | 16.3898(11)                                                      |
| <i>b</i> (Å)                                            | 15.4659(11)                                                                  | 15.333(2)                                                     | 16.8106(12)                                                   | 16.9463(12)                                                   | 18.3004(13)                                                      |
| <i>c</i> (Å)                                            | 17.7648(12)                                                                  | 16.440(2)                                                     | 15.9153(11)                                                   | 16.0776(11)                                                   | 24.0255(17)                                                      |
| α (°)                                                   | 90                                                                           | 90                                                            | 90                                                            | 90                                                            | 90                                                               |
| β (°)                                                   | 106.757(2)                                                                   | 90                                                            | 91.065(2)                                                     | 91.257(3)                                                     | 90                                                               |
| γ (°)                                                   | 90                                                                           | 90                                                            | 90                                                            | 90                                                            | 90                                                               |
| <i>V</i> (Å <sup>3</sup> )                              | 7177.2(9)                                                                    | 3125.7(8)                                                     | 3141.8(4)                                                     | 3191.5(4)                                                     | 7206.2(9)                                                        |
| <i>Z</i>                                                | 8                                                                            | 4                                                             | 4                                                             | 4                                                             | 8                                                                |
| ρ (mg/m <sup>3</sup> )                                  | 1.158                                                                        | 1.204                                                         | 1.171                                                         | 1.182                                                         | 1.202                                                            |
| μ (mm <sup>-1</sup> )                                   | 1.320                                                                        | 0.104                                                         | 0.694                                                         | 0.695                                                         | 0.692                                                            |
| Flack Parameter                                         | 0.035(2)                                                                     | −0.9(8)                                                       | 0.03(4)                                                       | 0.07(7)                                                       | −0.08(7)                                                         |
| <i>R</i> 1, <i>wR</i> 2<br>( <i>I</i> > 2σ( <i>I</i> )) | 0.0392, 0.1146                                                               | 0.0507, 0.1139                                                | 0.0342, 0.0925                                                | 0.0376, 0.0941                                                | 0.0445, 0.1004                                                   |
| <i>R</i> 1, <i>wR</i> 2<br>(all data)                   | 0.0401, 0.1154                                                               | 0.0659, 0.1212                                                | 0.0361, 0.0944                                                | 0.0426, 0.0966                                                | 0.0731, 0.1180                                                   |
| GOF                                                     | 1.042                                                                        | 1.065                                                         | 1.026                                                         | 1.046                                                         | 1.010                                                            |
| Largest Diff. Peak, Hole<br>(e Å <sup>-3</sup> )        | 0.937, −0.527                                                                | 0.354, −0.221                                                 | 0.225, −0.186                                                 | 0.400, −0.170                                                 | 0.275, −0.265                                                    |

**Table S3.06: Details of X-Ray Crystal Structures 20a,b, 21a,b, 22a,b, and 23–24**

| Compound                                                         | 20a,b                                                         | 21a,b                                                         | 22a,b                                                         | 23                                                              | 24                                                            |
|------------------------------------------------------------------|---------------------------------------------------------------|---------------------------------------------------------------|---------------------------------------------------------------|-----------------------------------------------------------------|---------------------------------------------------------------|
| Data Code                                                        | 007-15115                                                     | SJM15                                                         | 007-16083                                                     | SJM23                                                           | 007-16092                                                     |
| Empirical Formula                                                | C <sub>36</sub> H <sub>50</sub> N <sub>6</sub> O <sub>6</sub> | C <sub>32</sub> H <sub>49</sub> N <sub>5</sub> O <sub>7</sub> | C <sub>29</sub> H <sub>51</sub> N <sub>5</sub> O <sub>7</sub> | C <sub>33</sub> H <sub>50</sub> N <sub>4</sub> O <sub>7</sub> S | C <sub>27</sub> H <sub>50</sub> N <sub>6</sub> O <sub>6</sub> |
| Temperature (K)                                                  | 93(2)                                                         | 100(2)                                                        | 93(2)                                                         | 100(2)                                                          | 93(2)                                                         |
| Wavelength (Å)                                                   | 1.54178                                                       | 0.7749                                                        | 1.54178                                                       | 0.7749                                                          | 1.54178                                                       |
| FW                                                               | 662.82                                                        | 615.76                                                        | 581.74                                                        | 646.83                                                          | 554.73                                                        |
| Crystal System                                                   | Monoclinic                                                    | Triclinic                                                     | Monoclinic                                                    | Orthorhombic                                                    | Orthorhombic                                                  |
| Space Group                                                      | <i>P</i> 2 <sub>1</sub>                                       | <i>P</i> 1                                                    | <i>P</i> 2 <sub>1</sub>                                       | <i>P</i> 2 <sub>1</sub> 2 <sub>1</sub> 2 <sub>1</sub>           | <i>P</i> 2 <sub>1</sub> 2 <sub>1</sub> 2 <sub>1</sub>         |
| <i>a</i> (Å)                                                     | 18.9459(13)                                                   | 5.8475(2)                                                     | 11.5458(8)                                                    | 11.8017(5)                                                      | 9.6322(7)                                                     |
| <i>b</i> (Å)                                                     | 10.2874(7)                                                    | 11.4463(4)                                                    | 16.5702(12)                                                   | 15.0992(6)                                                      | 10.7847(8)                                                    |
| <i>c</i> (Å)                                                     | 20.3541(14)                                                   | 26.2716(8)                                                    | 16.8885(12)                                                   | 19.6217(8)                                                      | 30.960(2)                                                     |
| $\alpha$ (°)                                                     | 90                                                            | 83.314(2)                                                     | 90                                                            | 90                                                              | 90                                                            |
| $\beta$ (°)                                                      | 114.654(2)                                                    | 84.006(2)                                                     | 92.912(2)                                                     | 90                                                              | 90                                                            |
| $\gamma$ (°)                                                     | 90                                                            | 78.952(2)                                                     | 90                                                            | 90                                                              | 90                                                            |
| <i>V</i> (Å <sup>3</sup> )                                       | 3605.5(4)                                                     | 1708.00(10)                                                   | 3226.9(4)                                                     | 3496.5(2)                                                       | 3216.1(4)                                                     |
| <i>Z</i>                                                         | 4                                                             | 2                                                             | 4                                                             | 4                                                               | 4                                                             |
| $\rho$ (mg/m <sup>3</sup> )                                      | 1.221                                                         | 1.197                                                         | 1.197                                                         | 1.229                                                           | 1.146                                                         |
| $\mu$ (mm <sup>-1</sup> )                                        | 0.680                                                         | 0.102                                                         | 0.698                                                         | 0.175                                                           | 0.662                                                         |
| Flack Parameter                                                  | -0.01(5)                                                      | -0.3(4)                                                       | 0.00(2)                                                       | -0.002(11)                                                      | -0.01(7)                                                      |
| <i>R</i> 1, <i>wR</i> 2<br>( <i>I</i> > 2 $\sigma$ ( <i>I</i> )) | 0.0350, 0.0900                                                | 0.0420, 0.0815                                                | 0.0258, 0.0657                                                | 0.0318, 0.0824                                                  | 0.0466, 0.1179                                                |
| <i>R</i> 1, <i>wR</i> 2<br>(all data)                            | 0.0375, 0.0918                                                | 0.0606, 0.0879                                                | 0.0261, 0.0659                                                | 0.0368, 0.0853                                                  | 0.0511, 0.1207                                                |
| GOF                                                              | 1.024                                                         | 1.017                                                         | 1.015                                                         | 1.037                                                           | 1.204                                                         |
| Largest Diff. Peak, Hole<br>(e Å <sup>-3</sup> )                 | 0.447, -0.284                                                 | 0.175, -0.217                                                 | 0.321, -0.130                                                 | 0.362, -0.268                                                   | 0.245, -0.163                                                 |

**Table S3.07: Details of X-Ray Crystal Structures 25–29a,b**

| Compound                                                | 25                                                            | 26                                                            | 27                                                            | 28                                                            | 29a,b                                                           |
|---------------------------------------------------------|---------------------------------------------------------------|---------------------------------------------------------------|---------------------------------------------------------------|---------------------------------------------------------------|-----------------------------------------------------------------|
| Data Code                                               | SJM17                                                         | 007-16004                                                     | 007-15168                                                     | 007-15136                                                     | 007-15145                                                       |
| Empirical Formula                                       | C <sub>26</sub> H <sub>47</sub> N <sub>5</sub> O <sub>7</sub> | C <sub>25</sub> H <sub>45</sub> N <sub>5</sub> O <sub>7</sub> | C <sub>29</sub> H <sub>45</sub> N <sub>5</sub> O <sub>7</sub> | C <sub>29</sub> H <sub>53</sub> N <sub>7</sub> O <sub>9</sub> | C <sub>28</sub> H <sub>46</sub> N <sub>6</sub> O <sub>6</sub> S |
| Temperature (K)                                         | 100(2)                                                        | 93(2)                                                         | 93(2)                                                         | 93(2)                                                         | 93(2)                                                           |
| Wavelength (Å)                                          | 0.7749                                                        | 1.54178                                                       | 1.54178                                                       | 1.54178                                                       | 1.54178                                                         |
| FW                                                      | 541.68                                                        | 527.66                                                        | 575.70                                                        | 643.78                                                        | 594.77                                                          |
| Crystal System                                          | Orthorhombic                                                  | Orthorhombic                                                  | Orthorhombic                                                  | Monoclinic                                                    | Triclinic                                                       |
| Space Group                                             | <i>P</i> 2 <sub>1</sub> 2 <sub>1</sub> 2 <sub>1</sub>         | <i>P</i> 2 <sub>1</sub> 2 <sub>1</sub> 2 <sub>1</sub>         | <i>P</i> 2 <sub>1</sub> 2 <sub>1</sub> 2 <sub>1</sub>         | <i>P</i> 2 <sub>1</sub>                                       | <i>P</i> 1                                                      |
| <i>a</i> (Å)                                            | 9.5263(3)                                                     | 9.6442(7)                                                     | 9.7528(7)                                                     | 9.6527(7)                                                     | 10.2959(7)                                                      |
| <i>b</i> (Å)                                            | 10.9728(4)                                                    | 10.6337(7)                                                    | 10.8277(8)                                                    | 18.7582(13)                                                   | 10.4853(7)                                                      |
| <i>c</i> (Å)                                            | 28.9779(10)                                                   | 28.723(2)                                                     | 29.439(2)                                                     | 10.5398(7)                                                    | 14.9355(10)                                                     |
| α (°)                                                   | 90                                                            | 90                                                            | 90                                                            | 90                                                            | 94.868(2)                                                       |
| β (°)                                                   | 90                                                            | 90                                                            | 90                                                            | 115.399(2)                                                    | 100.913(2)                                                      |
| γ (°)                                                   | 90                                                            | 90                                                            | 90                                                            | 90                                                            | 90.106(3)                                                       |
| <i>V</i> (Å <sup>3</sup> )                              | 3029.07(18)                                                   | 2945.6(4)                                                     | 3108.7(4)                                                     | 1724.0(2)                                                     | 1577.24(18)                                                     |
| <i>Z</i>                                                | 4                                                             | 4                                                             | 4                                                             | 2                                                             | 2                                                               |
| ρ (mg/m <sup>3</sup> )                                  | 1.188                                                         | 1.190                                                         | 1.230                                                         | 1.240                                                         | 1.252                                                           |
| μ (mm <sup>-1</sup> )                                   | 0.104                                                         | 0.716                                                         | 0.724                                                         | 0.764                                                         | 1.316                                                           |
| Flack Parameter                                         | −0.3(6)                                                       | 0.00(3)                                                       | 0.06(2)                                                       | 0.03(6)                                                       | 0.025(13)                                                       |
| <i>R</i> 1, <i>wR</i> 2<br>( <i>I</i> > 2σ( <i>I</i> )) | 0.0383, 0.0893                                                | 0.0241, 0.0625                                                | 0.0232, 0.0571                                                | 0.0291, 0.0646                                                | 0.0628, 0.1551                                                  |
| <i>R</i> 1, <i>wR</i> 2<br>(all data)                   | 0.0479, 0.0943                                                | 0.0245, 0.0629                                                | 0.0235, 0.0573                                                | 0.0348, 0.0667                                                | 0.0751, 0.1684                                                  |
| GOF                                                     | 1.020                                                         | 1.048                                                         | 1.052                                                         | 1.038                                                         | 1.017                                                           |
| Largest Diff. Peak, Hole<br>(e Å <sup>-3</sup> )        | 0.289, −0.251                                                 | 0.137, −0.128                                                 | 0.111, −0.137                                                 | 0.139, −0.149                                                 | 0.577, −0.419                                                   |



**Table S3.08: Details of X-Ray Crystal Structures 30–33a,b**

| Compound                                                         | 30                                                            | 31                                                            | 32a,b                                                         | 33a,b                                                         |
|------------------------------------------------------------------|---------------------------------------------------------------|---------------------------------------------------------------|---------------------------------------------------------------|---------------------------------------------------------------|
| Data Code                                                        | 007-15152                                                     | SJM5                                                          | SJM21                                                         | 007-16123                                                     |
| Empirical Formula                                                | C <sub>26</sub> H <sub>47</sub> N <sub>5</sub> O <sub>7</sub> | C <sub>28</sub> H <sub>43</sub> N <sub>5</sub> O <sub>7</sub> | C <sub>32</sub> H <sub>52</sub> N <sub>6</sub> O <sub>6</sub> | C <sub>24</sub> H <sub>43</sub> N <sub>5</sub> O <sub>7</sub> |
| Temperature (K)                                                  | 93(2)                                                         | 100(2)                                                        | 100(2)                                                        | 93(2)                                                         |
| Wavelength (Å)                                                   | 1.54178                                                       | 0.7749                                                        | 0.7749                                                        | 1.54178                                                       |
| FW                                                               | 541.68                                                        | 561.67                                                        | 616.79                                                        | 513.63                                                        |
| Crystal System                                                   | Monoclinic                                                    | Monoclinic                                                    | Orthorhombic                                                  | Orthorhombic                                                  |
| Space Group                                                      | <i>P</i> 2 <sub>1</sub>                                       | <i>P</i> 2 <sub>1</sub>                                       | <i>P</i> 2 <sub>1</sub> 2 <sub>1</sub> 2 <sub>1</sub>         | <i>P</i> 2 <sub>1</sub> 2 <sub>1</sub> 2 <sub>1</sub>         |
| <i>a</i> (Å)                                                     | 5.9090(4)                                                     | 10.6617(4)                                                    | 11.725(15)                                                    | 16.1450(11)                                                   |
| <i>b</i> (Å)                                                     | 24.4001(17)                                                   | 8.8095(4)                                                     | 22.82(3)                                                      | 16.2685(11)                                                   |
| <i>c</i> (Å)                                                     | 10.6197(7)                                                    | 15.8579(7)                                                    | 25.93(3)                                                      | 21.7425(15)                                                   |
| $\alpha$ (°)                                                     | 90                                                            | 90                                                            | 90                                                            | 90                                                            |
| $\beta$ (°)                                                      | 102.609(3)                                                    | 97.106(2)                                                     | 90                                                            | 90                                                            |
| $\gamma$ (°)                                                     | 90                                                            | 90                                                            | 90                                                            | 90                                                            |
| <i>V</i> (Å <sup>3</sup> )                                       | 1494.22(18)                                                   | 1478.00(11)                                                   | 6937(16)                                                      | 5710.8(7)                                                     |
| <i>Z</i>                                                         | 2                                                             | 2                                                             | 8                                                             | 8                                                             |
| $\rho$ (0.75mg/m <sup>3</sup> )                                  | 1.204                                                         | 1.262                                                         | 1.181                                                         | 1.195                                                         |
| $\mu$ (mm <sup>-1</sup> )                                        | 0.718                                                         | 0.110                                                         | 0.100                                                         | 0.725                                                         |
| Flack Parameter                                                  | −0.03(5)                                                      | 0.1(2)                                                        | 0.4(6)                                                        | 0.09(10)                                                      |
| <i>R</i> 1, <i>wR</i> 2<br>( <i>I</i> > 2 $\sigma$ ( <i>I</i> )) | 0.0292, 0.0738                                                | 0.0434, 0.1043                                                | 0.0575, 0.1290                                                | 0.0592, 0.1260                                                |
| <i>R</i> 1, <i>wR</i> 2<br>(all data)                            | 0.0303, 0.0743                                                | 0.0556, 0.1108                                                | 0.0773, 0.1385                                                | 0.1062, 0.1479                                                |
| GOF                                                              | 1.037                                                         | 1.062                                                         | 1.093                                                         | 1.048                                                         |
| Largest Diff. Peak, Hole<br>(e Å <sup>-3</sup> )                 | 0.123, −0.153                                                 | 0.425, −0.246                                                 | 0.742, −0.213                                                 | 0.352, −0.265                                                 |

**Table S3.09:** Details of X-Ray Crystal Structures **34–37** Reproduced from Previous References

| Compound                                                         | <b>34</b> <sup>8</sup>                                                                   | <b>35</b> <sup>9</sup>                                        | <b>36</b> <sup>10</sup>                                                                            | <b>37</b> <sup>11</sup>                                       |
|------------------------------------------------------------------|------------------------------------------------------------------------------------------|---------------------------------------------------------------|----------------------------------------------------------------------------------------------------|---------------------------------------------------------------|
| CSD Refcode                                                      | WEDBUD                                                                                   | GOPDEU                                                        | COFXUR                                                                                             | LOHWOU                                                        |
| Empirical Formula                                                | C <sub>30</sub> H <sub>44</sub> N <sub>4</sub> O <sub>8</sub> •<br>2(CHCl <sub>3</sub> ) | C <sub>31</sub> H <sub>42</sub> N <sub>4</sub> O <sub>5</sub> | C <sub>22</sub> H <sub>31</sub> N <sub>3</sub> O <sub>5</sub> •<br>CH <sub>2</sub> Cl <sub>2</sub> | C <sub>35</sub> H <sub>46</sub> N <sub>6</sub> O <sub>5</sub> |
| Temperature (K)                                                  | 193                                                                                      | 183                                                           | 173                                                                                                | N/A                                                           |
| FW                                                               | 588.70                                                                                   | 550.70                                                        | 417.51                                                                                             | 630.79                                                        |
| Crystal System                                                   | Monoclinic                                                                               | Orthorhombic                                                  | Orthorhombic                                                                                       | Orthorhombic                                                  |
| Space Group                                                      | <i>P</i> 2 <sub>1</sub>                                                                  | <i>P</i> 2 <sub>1</sub> 2 <sub>1</sub> 2 <sub>1</sub>         | <i>P</i> 2 <sub>1</sub> 2 <sub>1</sub> 2 <sub>1</sub>                                              | <i>P</i> 2 <sub>1</sub> 2 <sub>1</sub> 2 <sub>1</sub>         |
| <i>a</i> (Å)                                                     | 10.8964(7)                                                                               | 11.5439(1)                                                    | 9.0028(18)                                                                                         | 12.1058(7)                                                    |
| <i>b</i> (Å)                                                     | 11.0190(8)                                                                               | 27.4393(2)                                                    | 11.376(2)                                                                                          | 12.1453(7)                                                    |
| <i>c</i> (Å)                                                     | 17.9964(12)                                                                              | 9.8370(1)                                                     | 26.325(5)                                                                                          | 23.493(1)                                                     |
| $\alpha$ (°)                                                     | 90                                                                                       | 90                                                            | 90                                                                                                 | 90                                                            |
| $\beta$ (°)                                                      | 102.471(2)                                                                               | 90                                                            | 90                                                                                                 | 90                                                            |
| $\gamma$ (°)                                                     | 90                                                                                       | 90                                                            | 90                                                                                                 | 90                                                            |
| <i>V</i> (Å <sup>3</sup> )                                       | 2109.8                                                                                   | 3115.9                                                        | 2696.1                                                                                             | 3454.1                                                        |
| <i>Z</i>                                                         | 2                                                                                        | 4                                                             | 4                                                                                                  | 4                                                             |
| <i>R</i> 1, <i>wR</i> 2<br>( <i>I</i> > 2 $\sigma$ ( <i>I</i> )) | 0.0581                                                                                   | 0.0756                                                        | 0.0473                                                                                             | 0.0639                                                        |

(a)

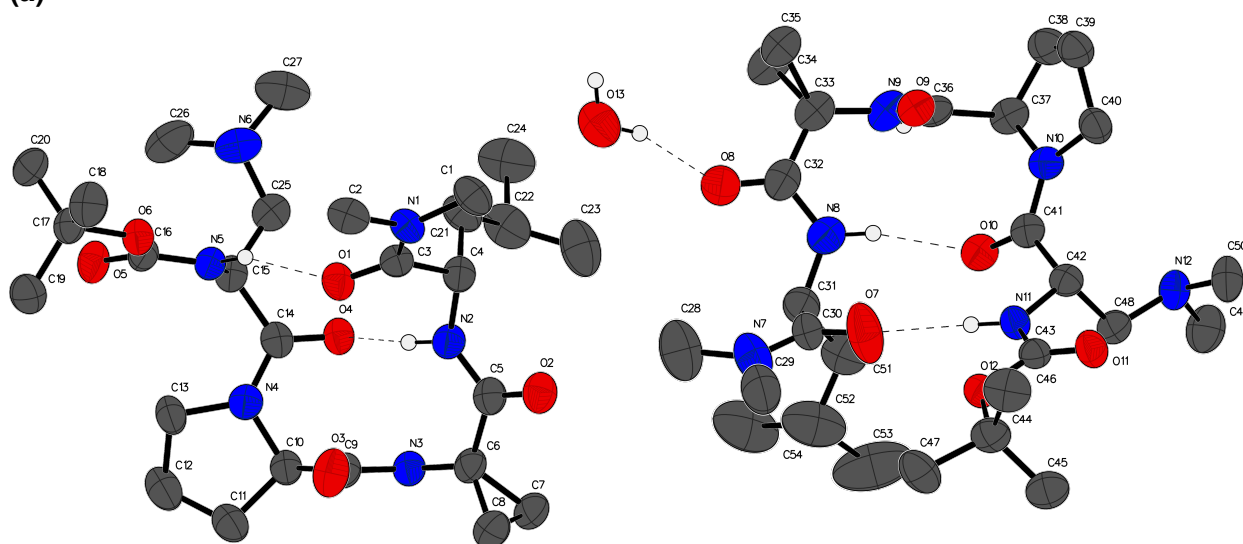

(b)

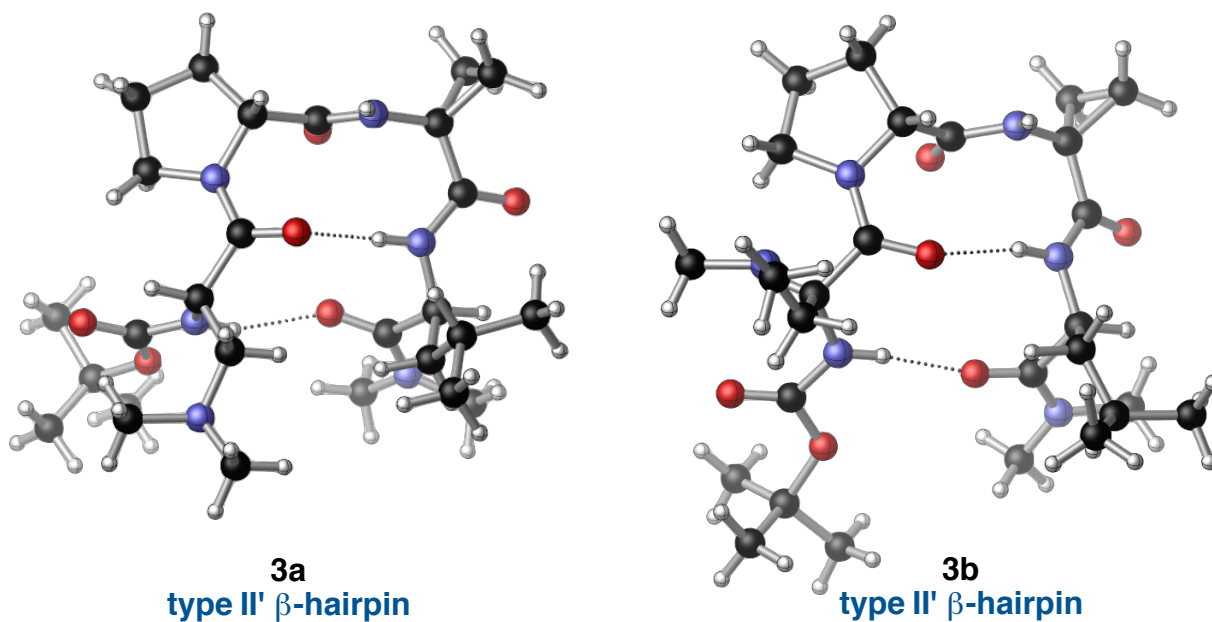

**Figure S3.01:** (a) The full numbering scheme of **3a,b** with 50% thermal ellipsoids. Most H-atoms have been omitted for clarity, while some are depicted as circles. Dashed lines highlight H-bonding interactions. (b) Images of **3a** and **3b** rendered separately using CYLview.

(a)

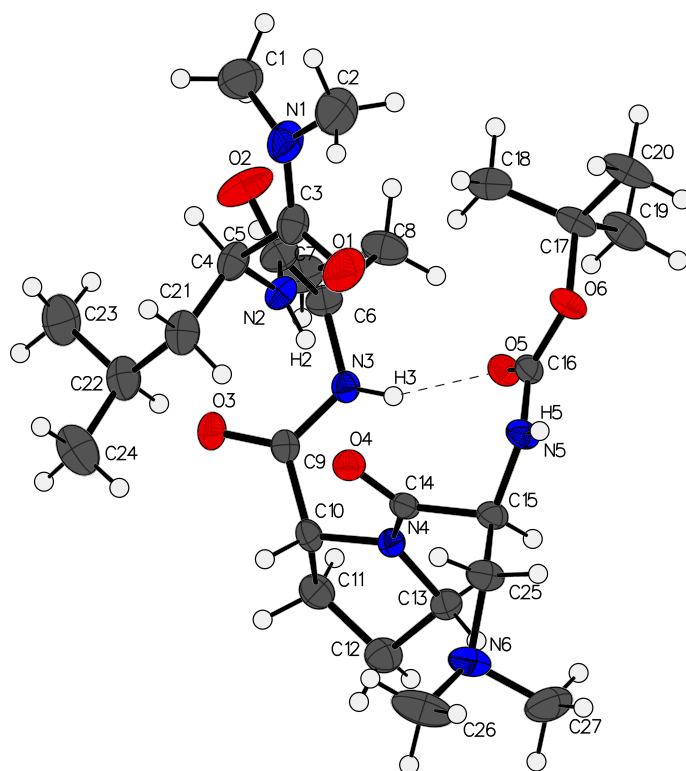

(b)

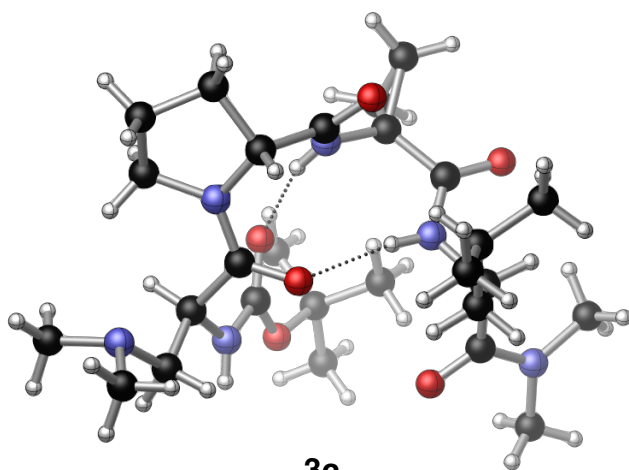

**3c**  
type I' double  $\beta$ -turn

**Figure S3.02:** (a) The full numbering scheme of **3c** with 50% thermal ellipsoids. The H-atoms are shown as circles for clarity. Dashed lines highlight H-bonding interactions. (b) Image of **3c** rendered using CYLview.

(a)

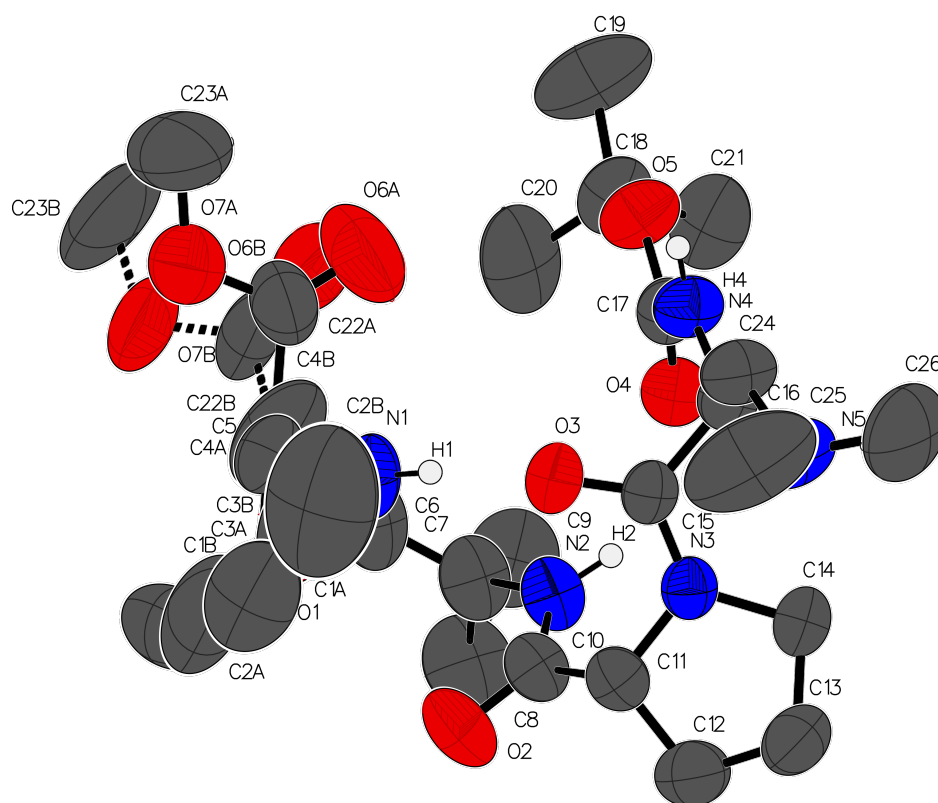

(b)

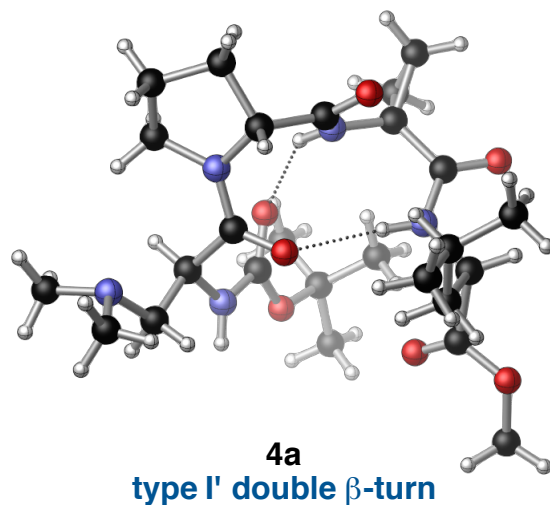

**Figure S3.03:** (a) The full numbering scheme of **4a** with 50% thermal ellipsoids. Most of the H-atoms have been omitted for clarity, while some are depicted as circles. Dashed bonds highlight disordered portions of the model. (b) Image of **4a** rendered using CYLview.

(a)

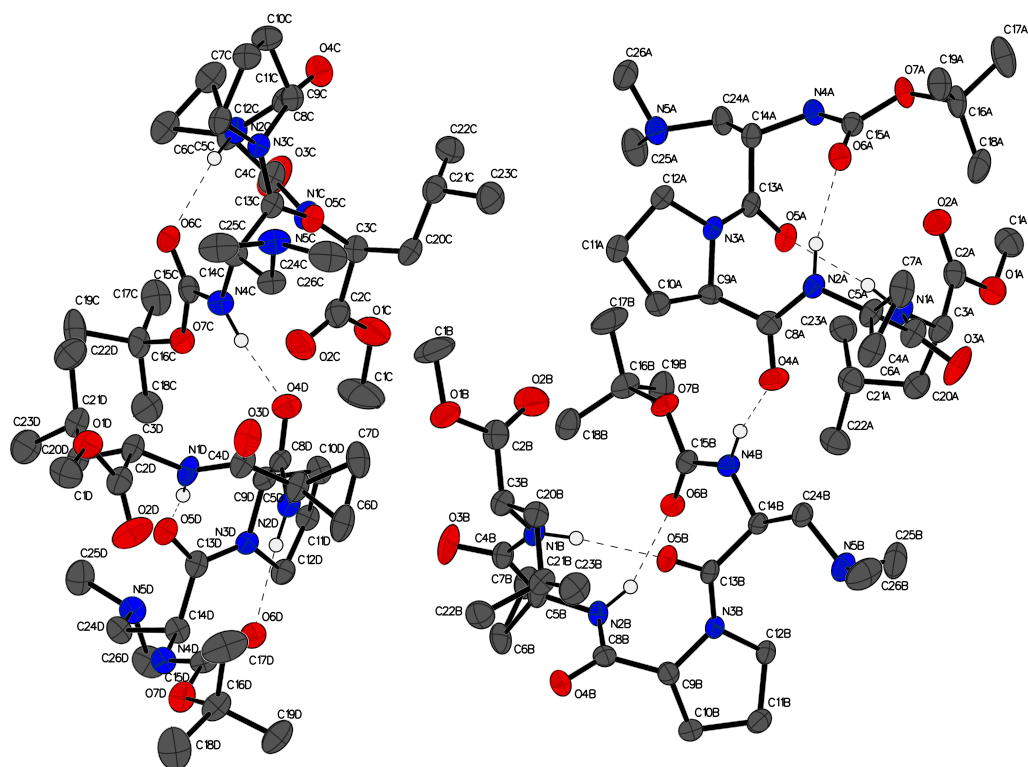

(b)

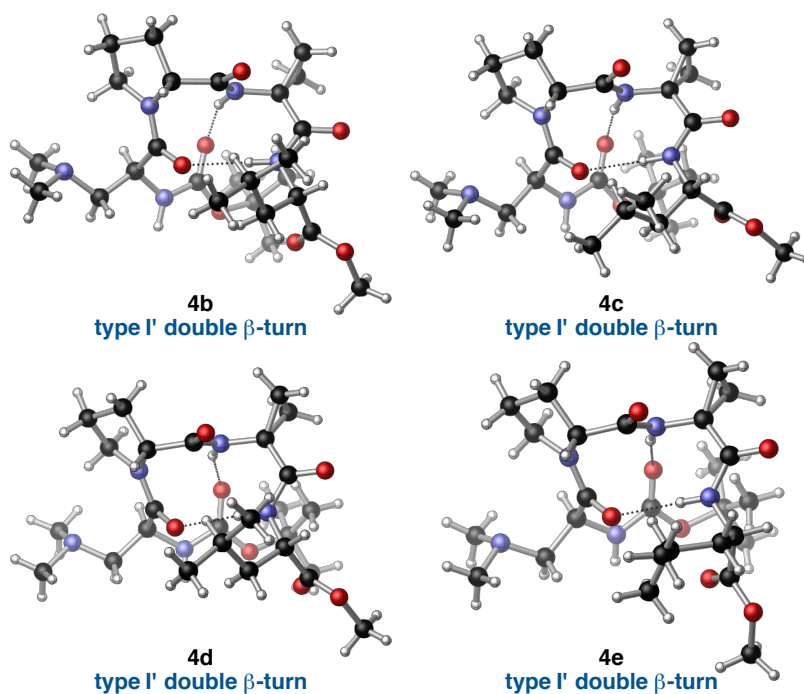

**Figure S3.04:** (a) The full numbering scheme of **4b–e** with 50% thermal ellipsoids. Most of the H-atoms have been omitted for clarity, while some are depicted as circles. Dashed lines highlight H-bonding interactions. (b) Images of **4b–e** rendered separately using CYLview.

(a)

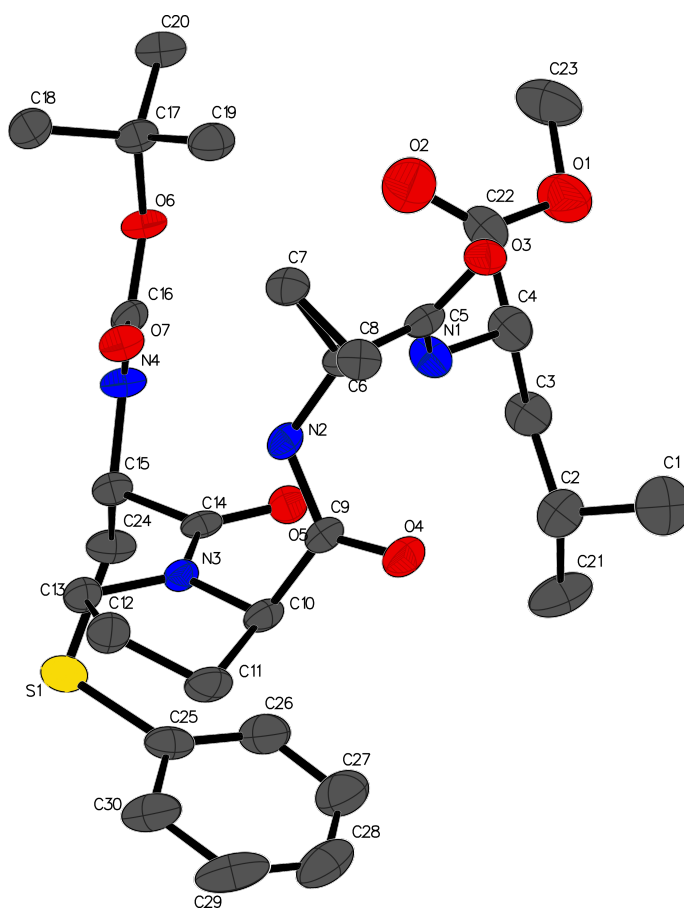

(b)

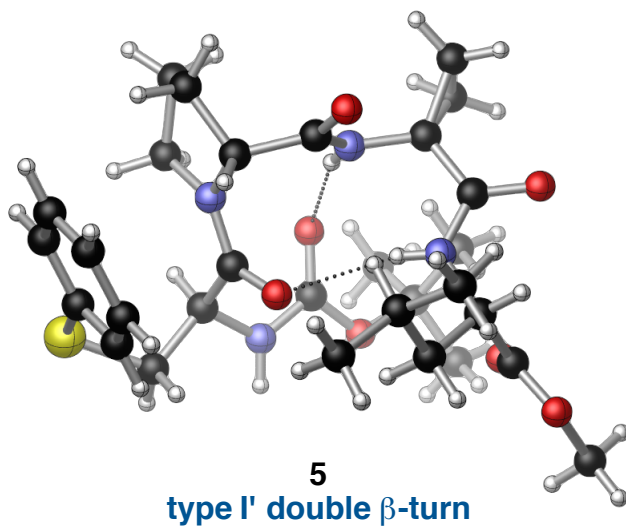

**Figure S3.05:** (a) The full numbering scheme of **5** with 50% thermal ellipsoids. The H-atoms have been omitted for clarity. (b) Image of **5** rendered using CYLview.

(a)

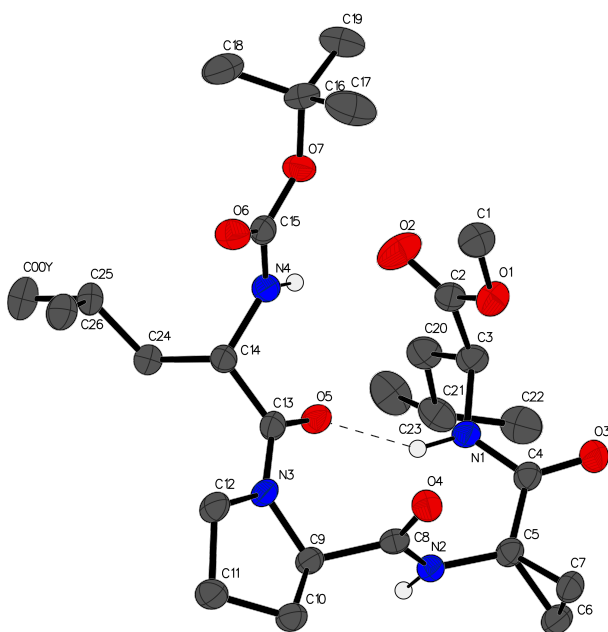

(b)

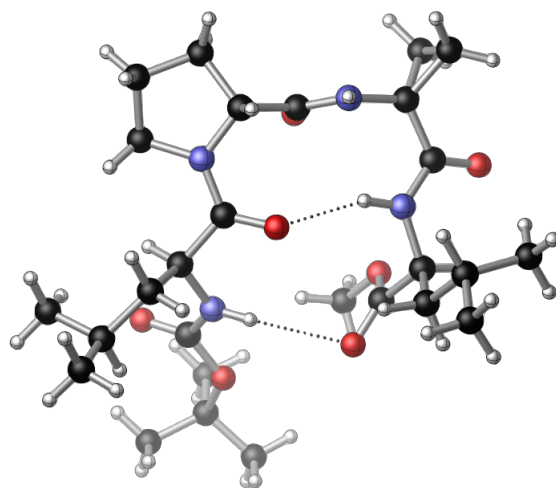

**6**  
**type II'  $\beta$ -hairpin**

**Figure S3.06:** (a) The full numbering scheme of **6** with 50% thermal ellipsoids. Most of the H-atoms have been omitted for clarity, while some are shown as circles. Dashed lines highlight H-bonding interactions. (b) Image of **6** rendered using CYLview.



(a)

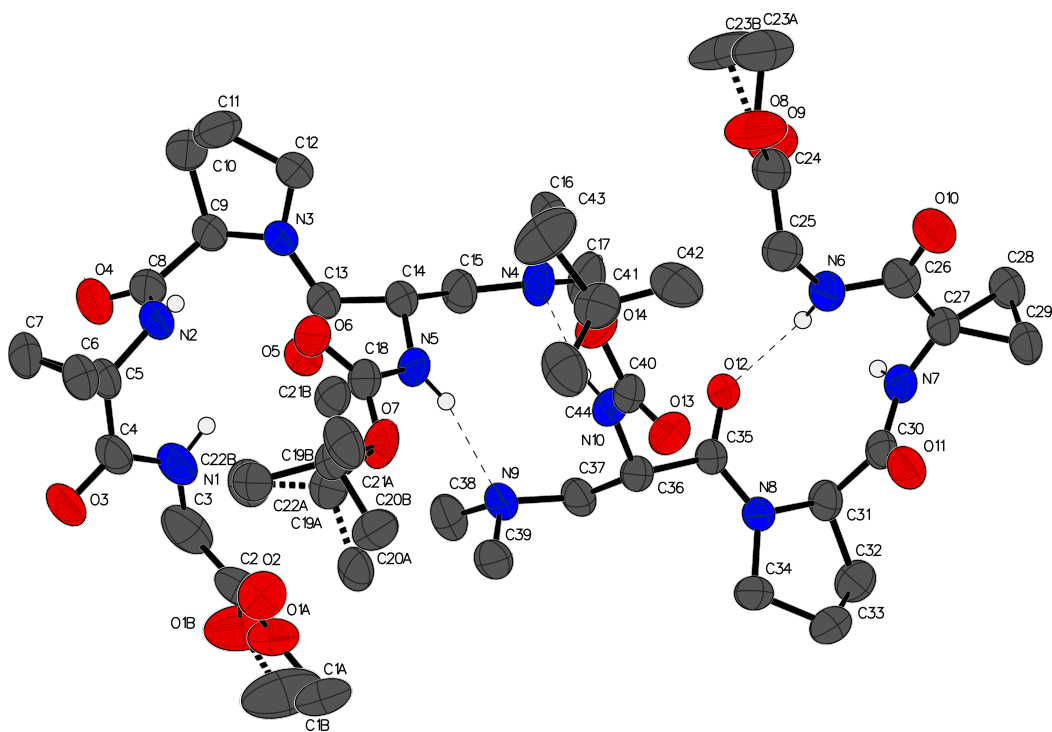

(b)

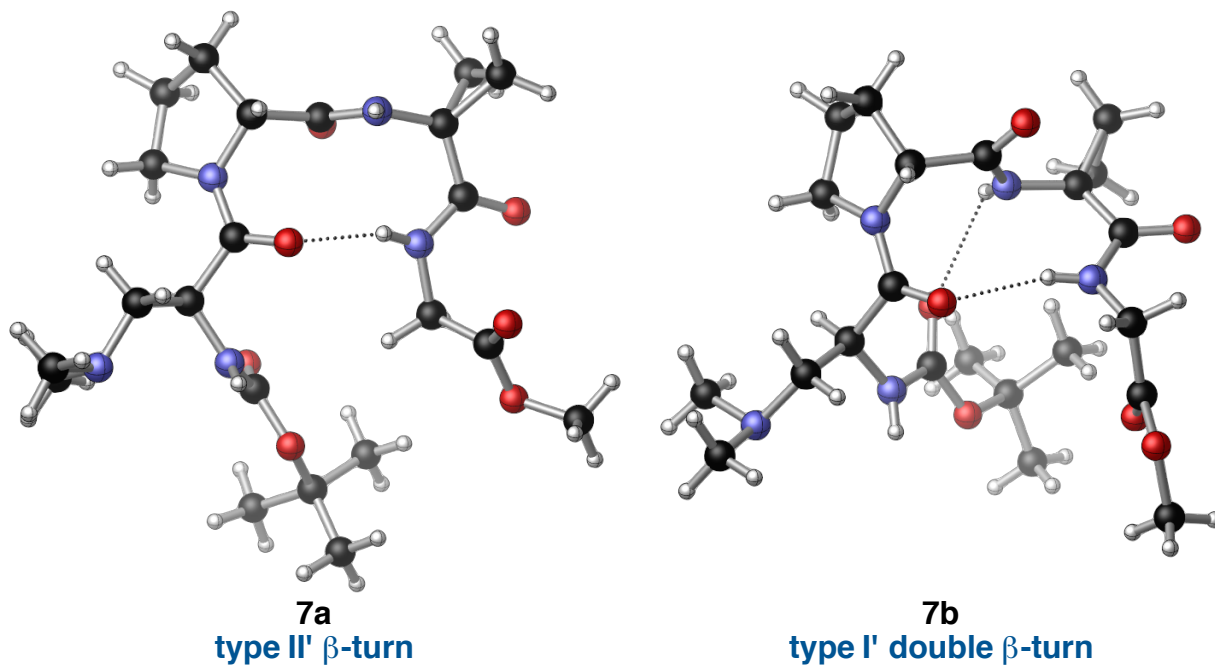

**Figure S3.07:** (a) The full numbering scheme of **7a,b** with 50% thermal ellipsoids. Most of the H-atoms have been omitted for clarity, while some are shown as circles. Dashed lines highlight H-bonding interactions. (b) Images of **7a** and **7b** rendered separately using CYLview.

(a)

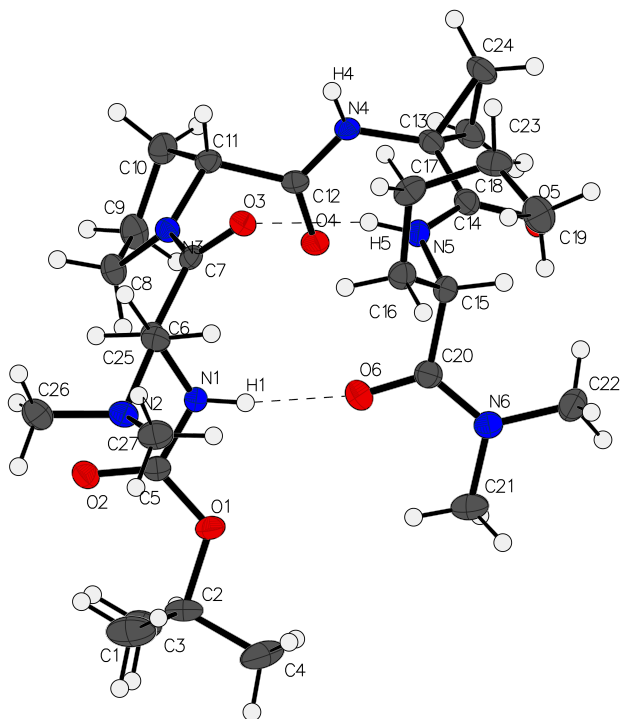

(b)

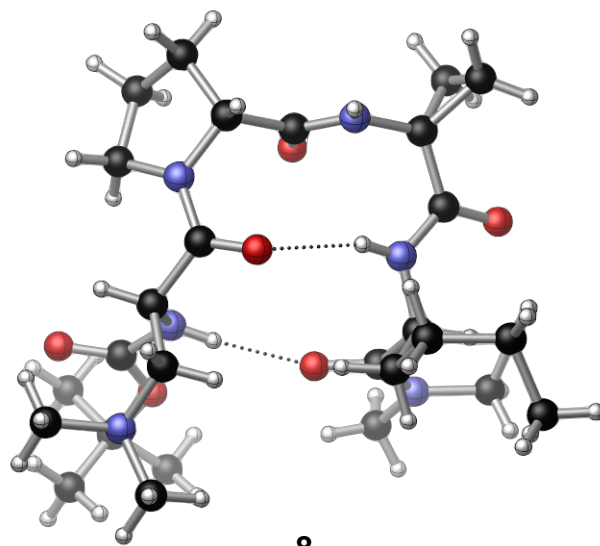

**8**  
type II'  $\beta$ -hairpin

**Figure S3.08:** (a) The full numbering scheme of **8** with 50% thermal ellipsoids. The H-atoms are shown as circles for clarity. Dashed lines highlight H-bonding interactions. (b) Image of **8** rendered using CYLview.

(a)

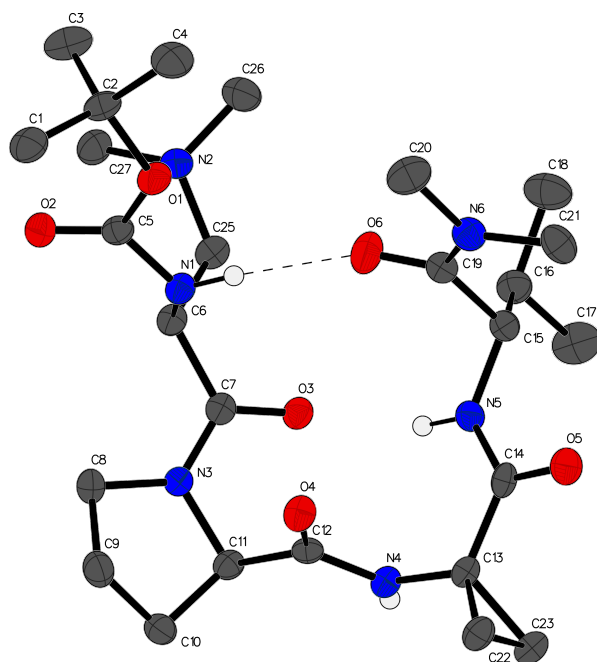

(b)

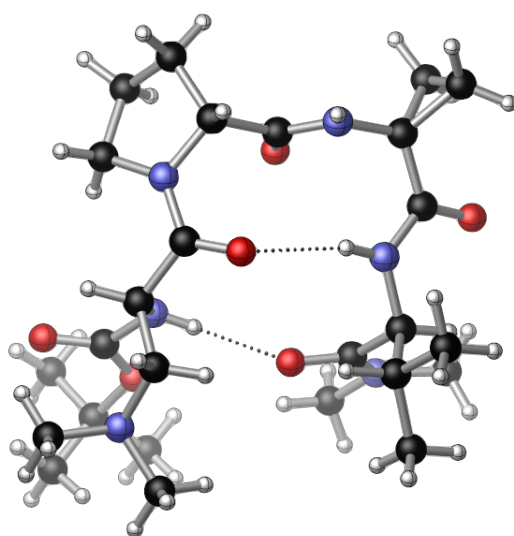

**9**  
type II'  $\beta$ -hairpin

**Figure S3.09:** (a) The full numbering scheme of **9** with 50% thermal ellipsoids. Most of the H-atoms have been omitted for clarity, while some are shown as circles. Dashed lines highlight H-bonding interactions. (b) Image of **9** rendered using CYLview.

(a)

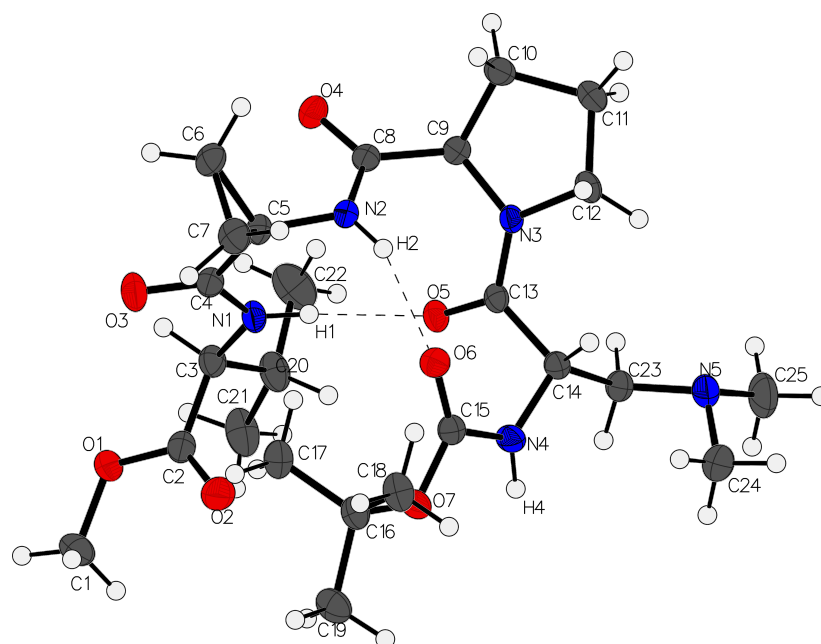

(b)

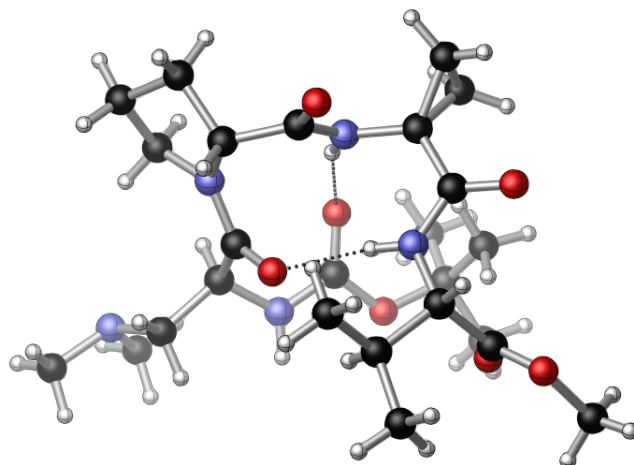

**10**  
type I' double  $\beta$ -turn

**Figure S3.10:** (a) The full numbering scheme of **10** with 50% thermal ellipsoids. The H-atoms are shown as circles for clarity. Dashed lines highlight H-bonding interactions. (b) Image of **10** rendered using CYLview.

(a)

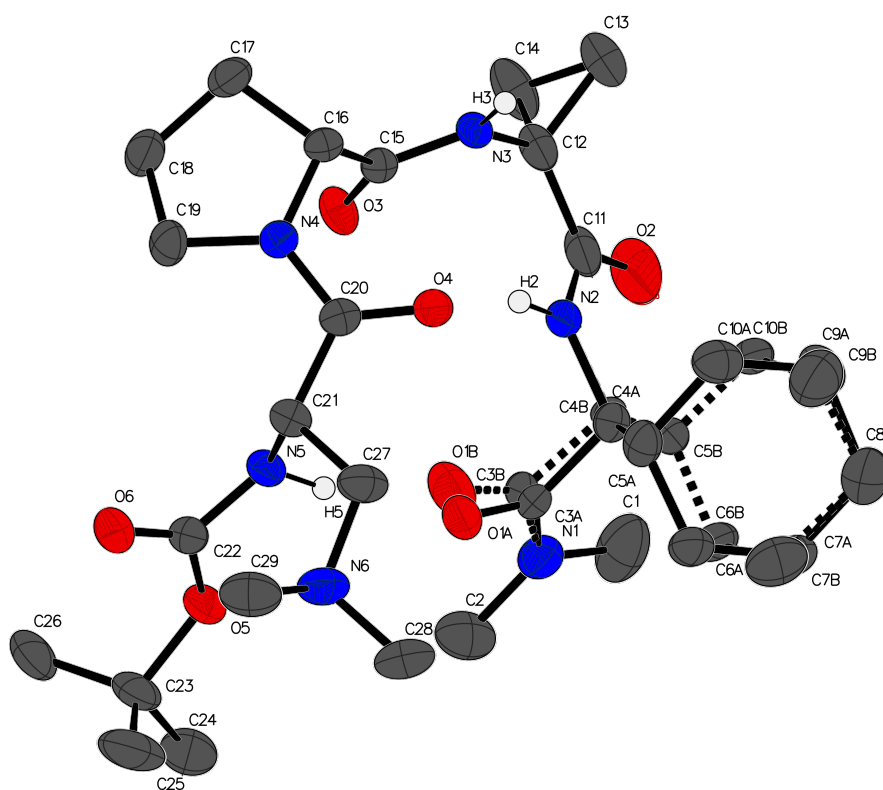

(b)

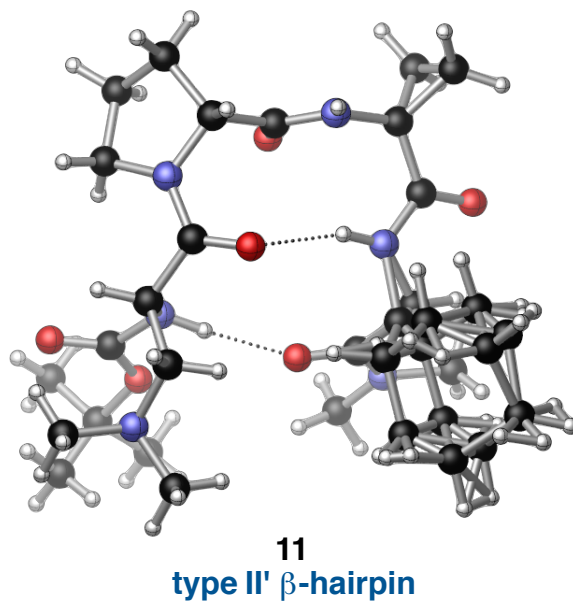

**Figure S3.11:** (a) The full numbering scheme of **11** with 50% thermal ellipsoids. Most of the H-atoms have been omitted for clarity, while some are depicted as circles. Dashed bonds highlight disordered portions of the model. (b) Image of **11** rendered using CYLview.

(a)

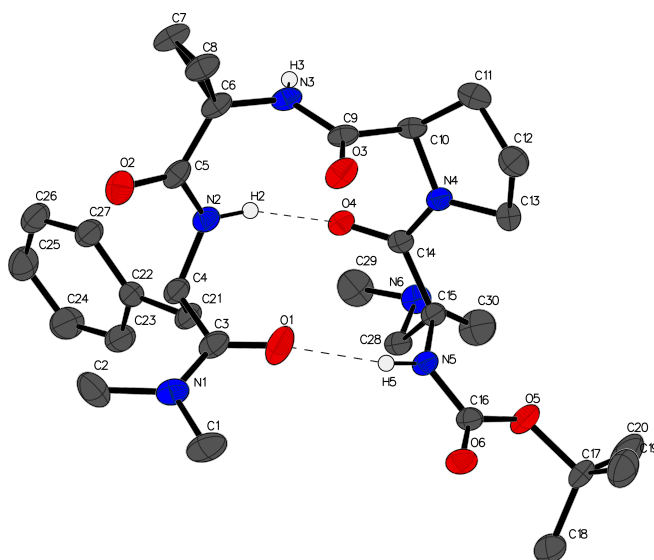

(b)

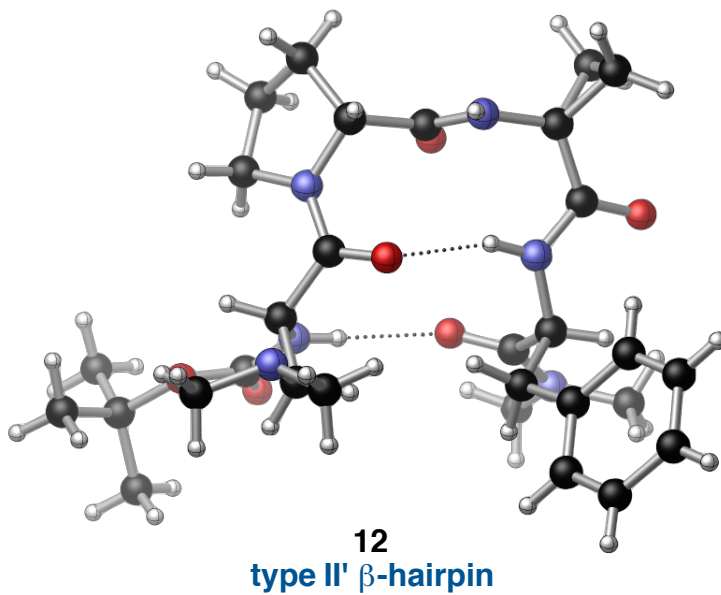

**Figure S3.12:** (a) The full numbering scheme of **12** with 50% thermal ellipsoids. Most of the H-atoms have been omitted for clarity, while some are depicted as circles. Dashed lines highlight H-bonding interactions. (b) Image of **12** rendered using CYLview.

(a)

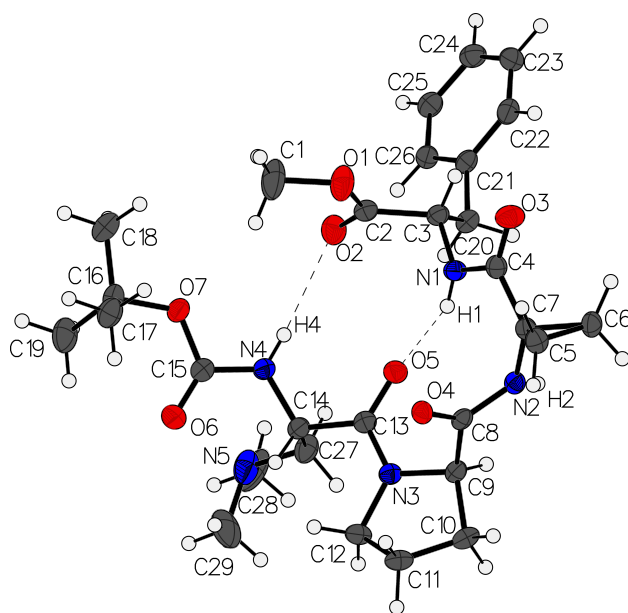

(b)

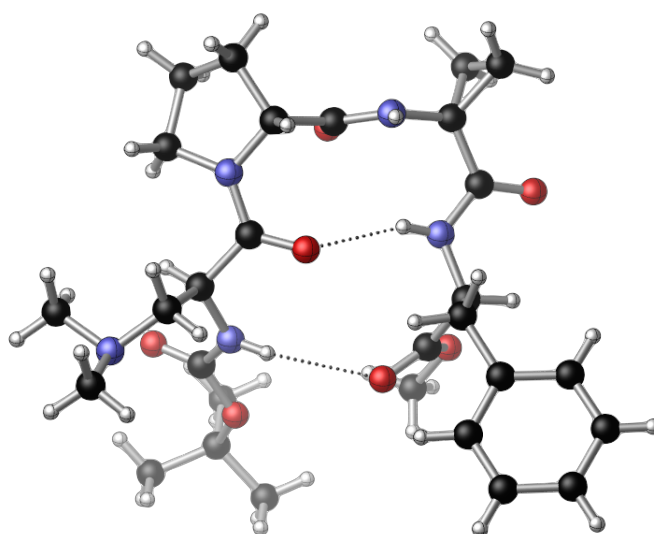

**13**  
**type II'  $\beta$ -hairpin**

**Figure S3.13:** (a) The full numbering scheme of **13** with 50% thermal ellipsoids. The H-atoms are depicted as circles for clarity. Dashed lines highlight H-bonding interactions. (b) Image of **13** rendered using CYLview.

(a)

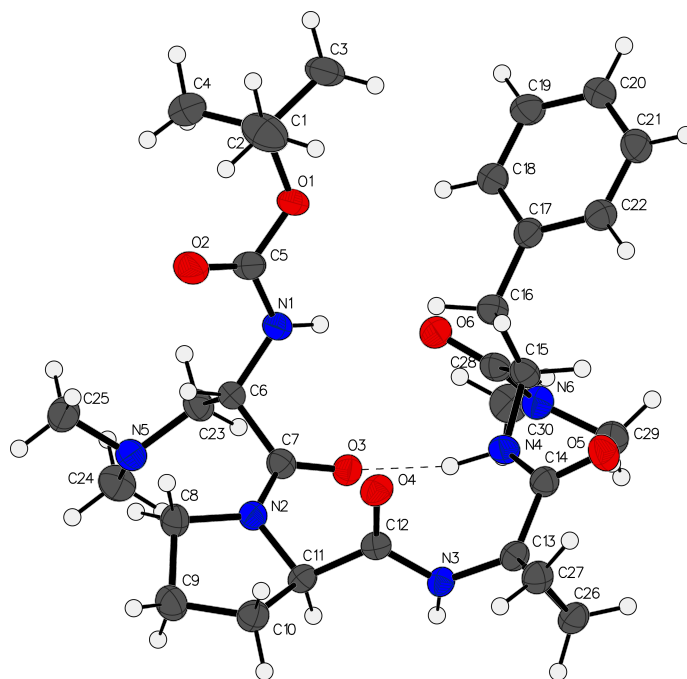

(b)

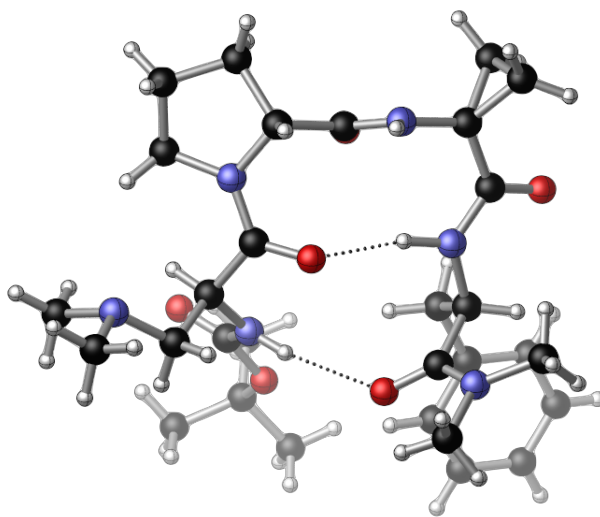

**14**  
**type II'  $\beta$ -hairpin**

**Figure S3.14:** (a) The full numbering scheme of **14** with 50% thermal ellipsoids. The H-atoms are depicted as circles for clarity. Dashed lines highlight H-bonding interactions. (b) Image of **14** rendered using CYLview.



(a)



(b)

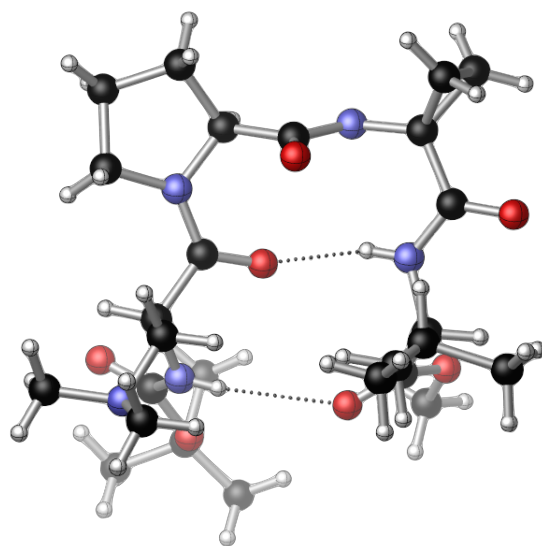

**15**  
**type II  $\beta$ -hairpin**

**Figure S3.15:** (a) The full numbering scheme of **15** with 50% thermal ellipsoids. The H-atoms are depicted as circles for clarity. Dashed lines highlight H-bonding interactions. (b) Image of **15** rendered using CYLview.

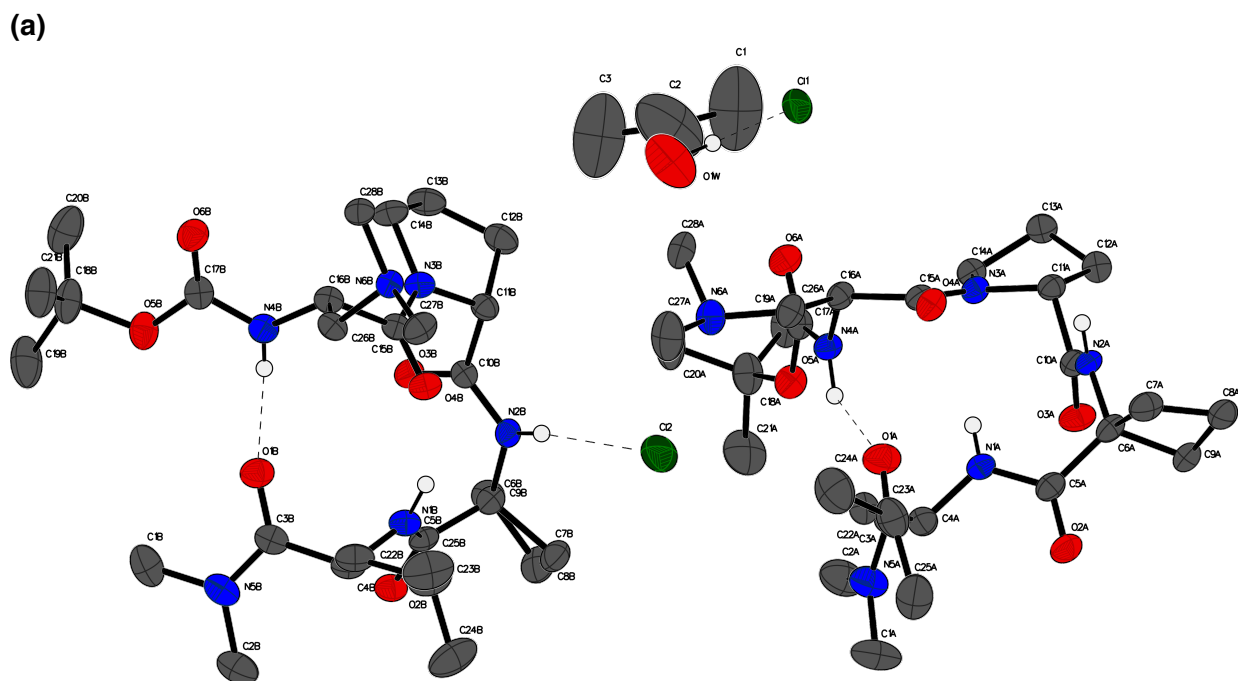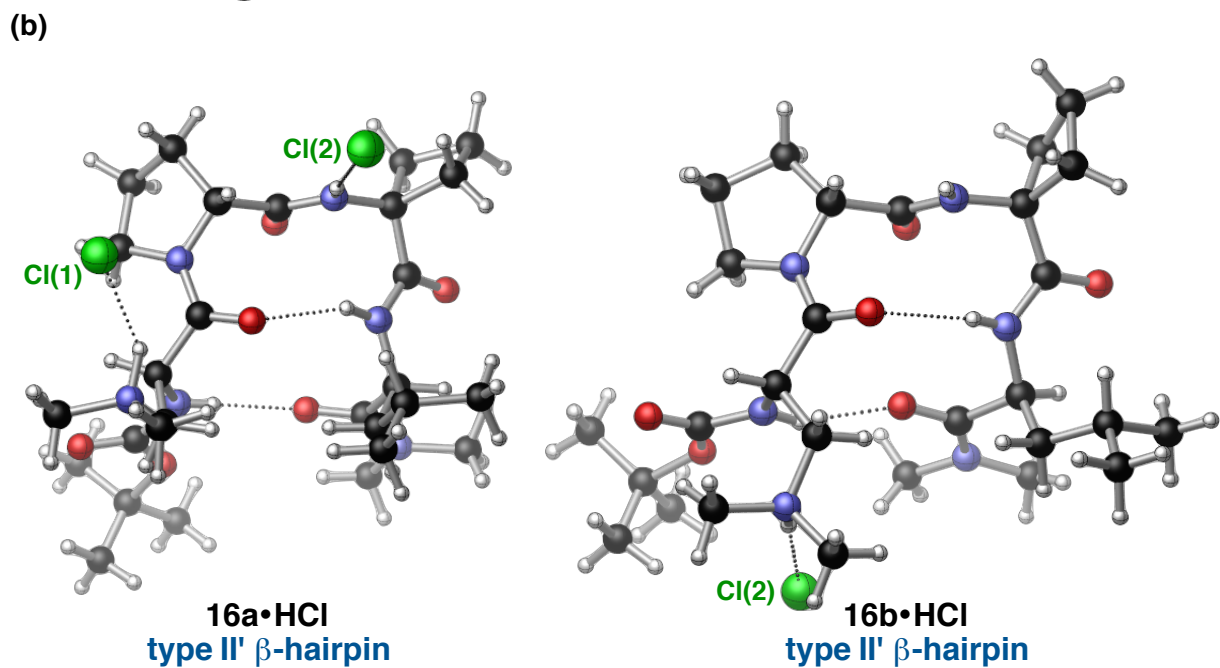

**Figure S3.16:** (a) The full numbering scheme of **16a,b·2HCl** with 50% thermal ellipsoids. Most of the H-atoms have been omitted for clarity, while some are depicted as circles. Dashed lines highlight H-bonding interactions. (b) Images of **16a·HCl** and **16b·HCl** rendered separately using CYLview.

(a)

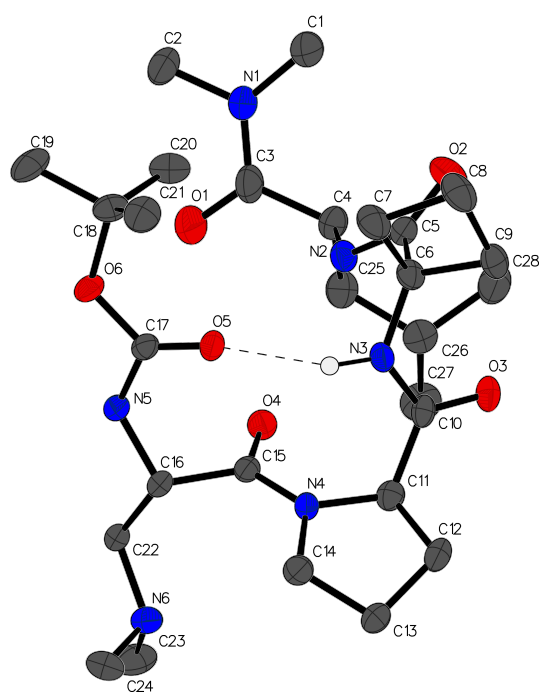

(b)

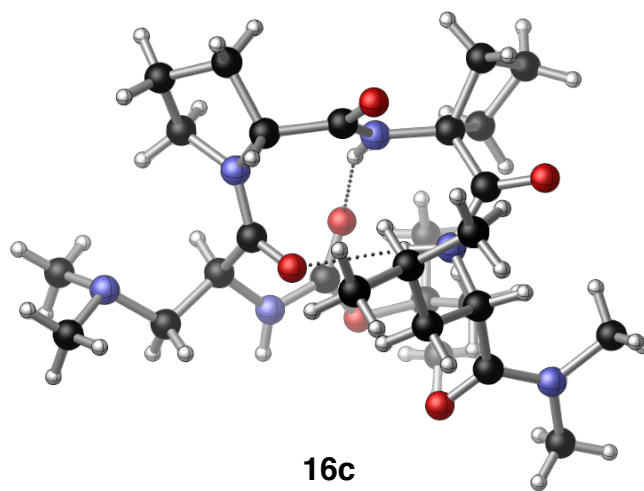

**16c**  
type I' double  $\beta$ -turn

**Figure S3.17:** (a) The full numbering scheme of **16c** with 50% thermal ellipsoids. Most of the H-atoms have been omitted for clarity, while some are depicted as circles. Dashed lines highlight H-bonding interactions. (b) Image of **16c** rendered using CYLview.

(a)

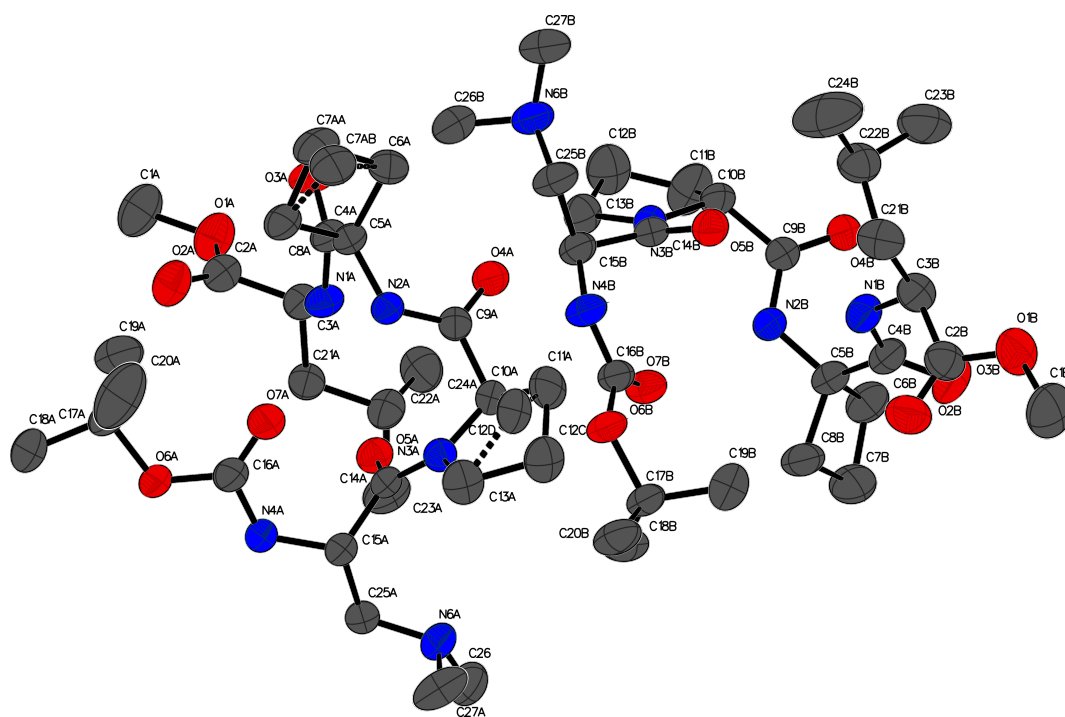

(b)

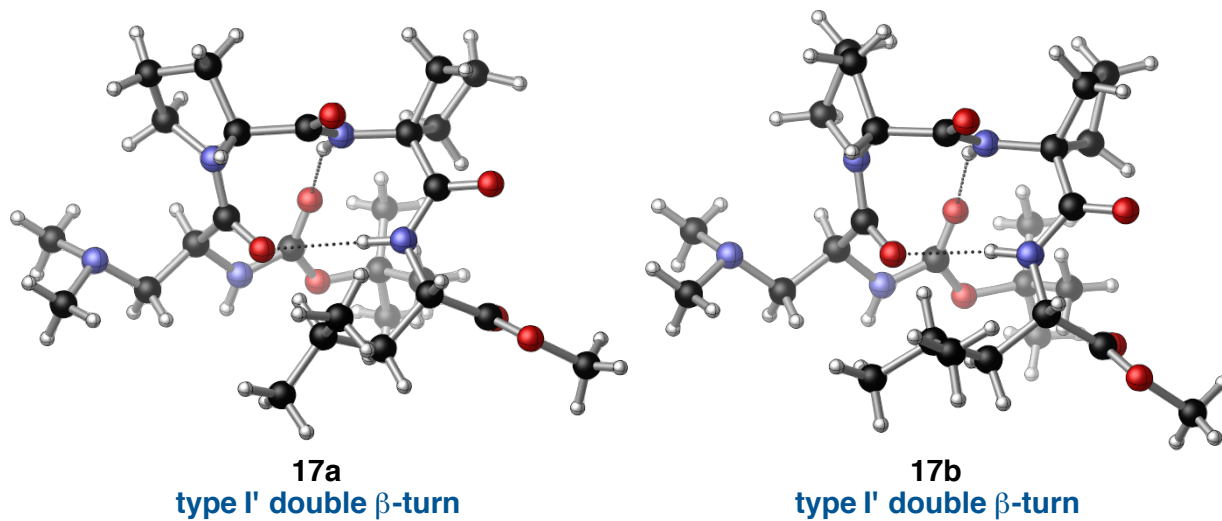

**Figure S3.18:** (a) The full numbering scheme of **17a,b** with 50% thermal ellipsoids. The H-atoms have been omitted for clarity. Dashed bonds highlight disordered portions of the model. (b) Images of **17a** and **17b** rendered separately using CYLview.

(a)

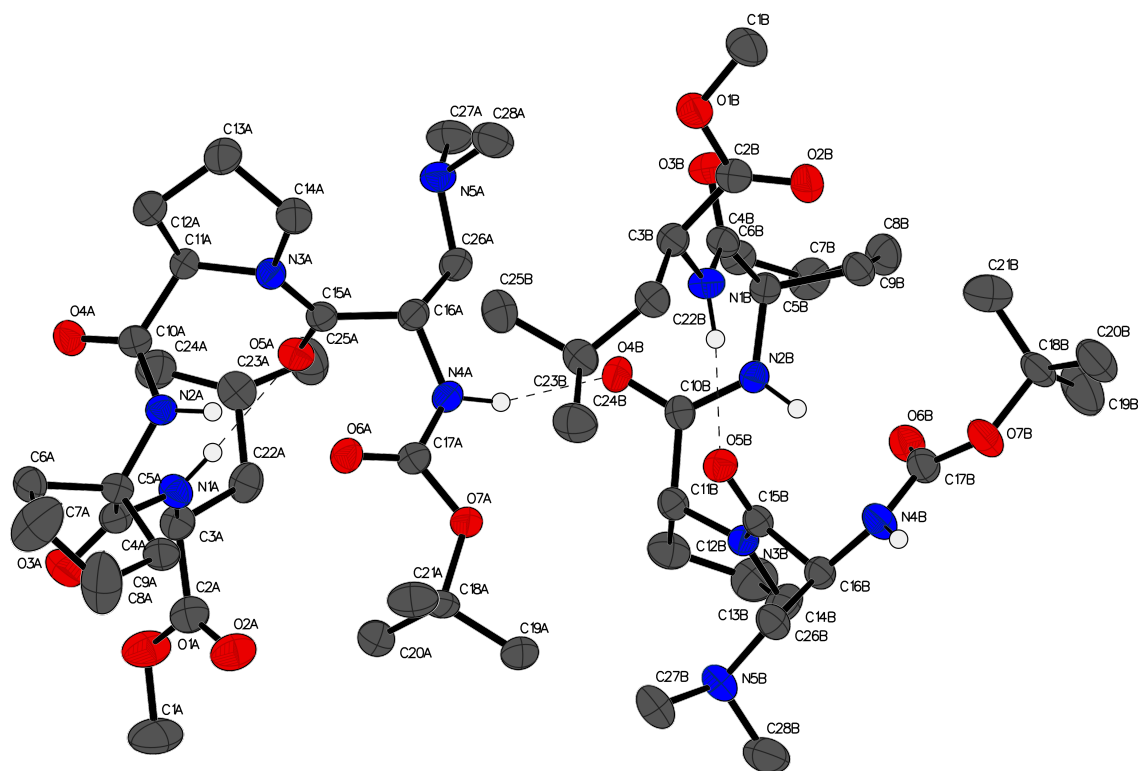

(b)

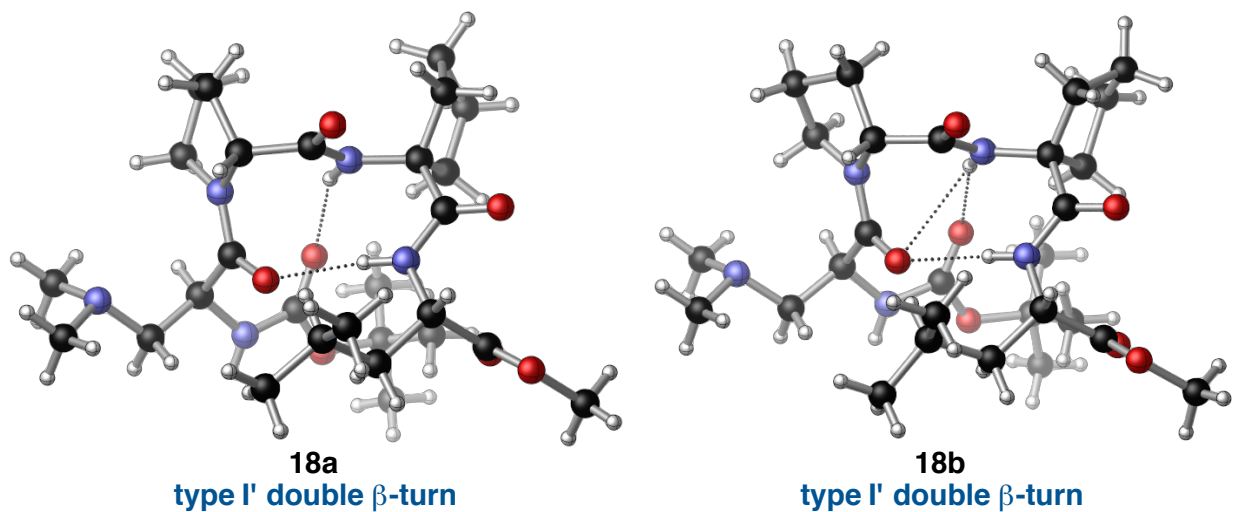

**Figure S3.19:** (a) The full numbering scheme of **18a,b** with 50% thermal ellipsoids. Most of the H-atoms have been omitted for clarity, while some are depicted as circles. Dashed lines highlight H-bonding interactions. (b) Images of **18a** and **18b** rendered separately using CYLview.

(a)

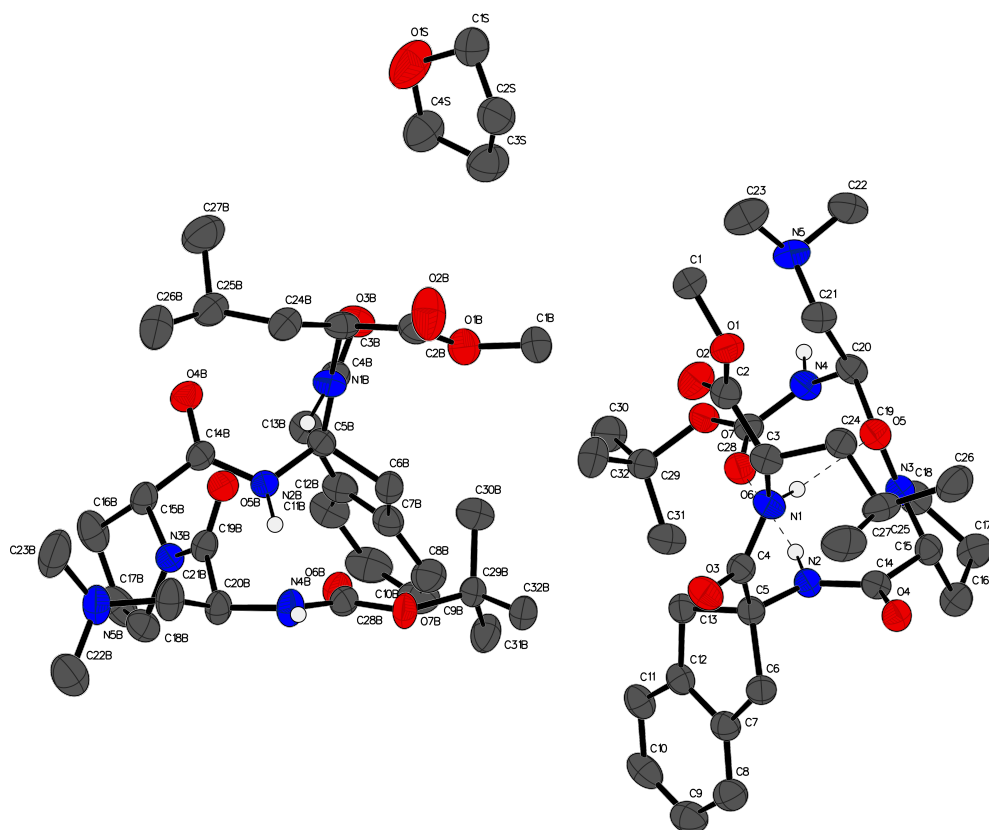

(b)

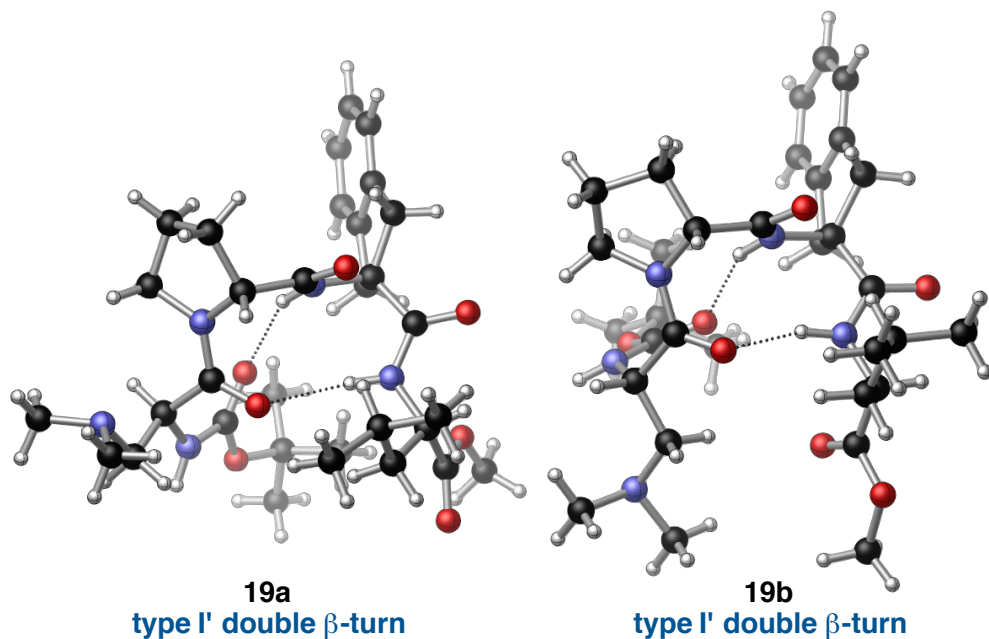

**Figure S3.20:** (a) The full numbering scheme of **19a,b** with 50% thermal ellipsoids. Most of the H-atoms have been omitted for clarity, while some are depicted as circles. Dashed lines highlight H-bonding interactions. (b) Images of **19a** and **19b** rendered separately using CYLview.

(a)

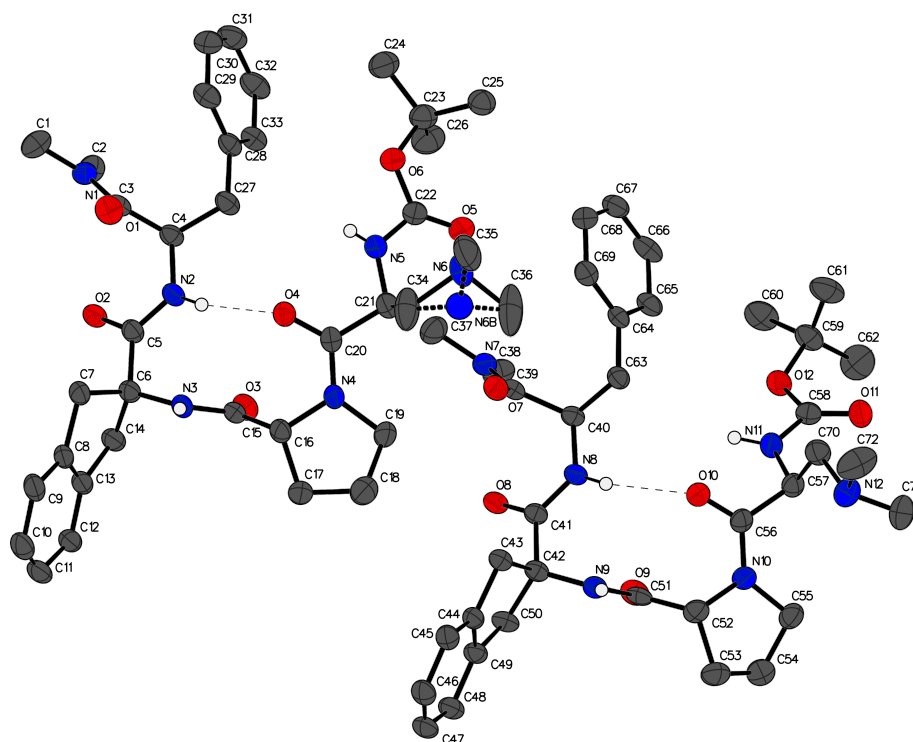

(b)

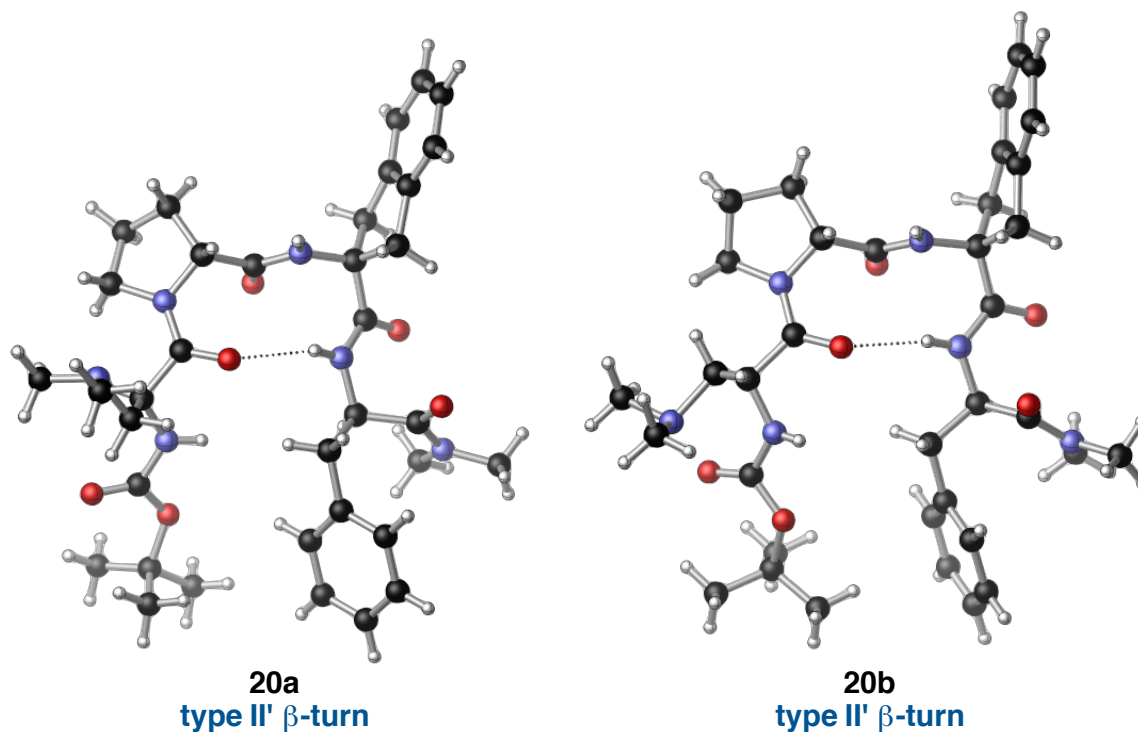

**Figure S3.21:** (a) The full numbering scheme of **20a,b** with 50% thermal ellipsoids. Most of the H-atoms have been omitted for clarity, while some are depicted as circles. Dashed lines highlight H-bonding interactions. (b) Images of **20a** and **20b** rendered separately using CYLview.

(a)

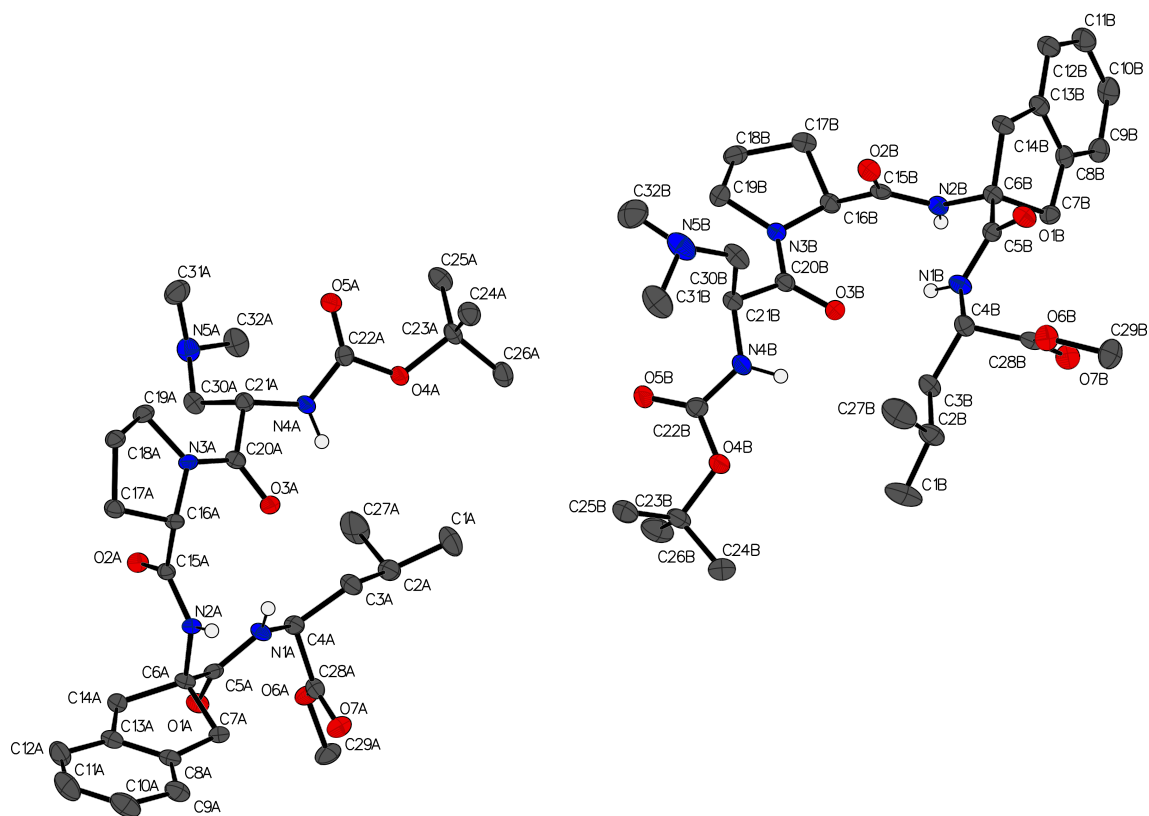

(b)

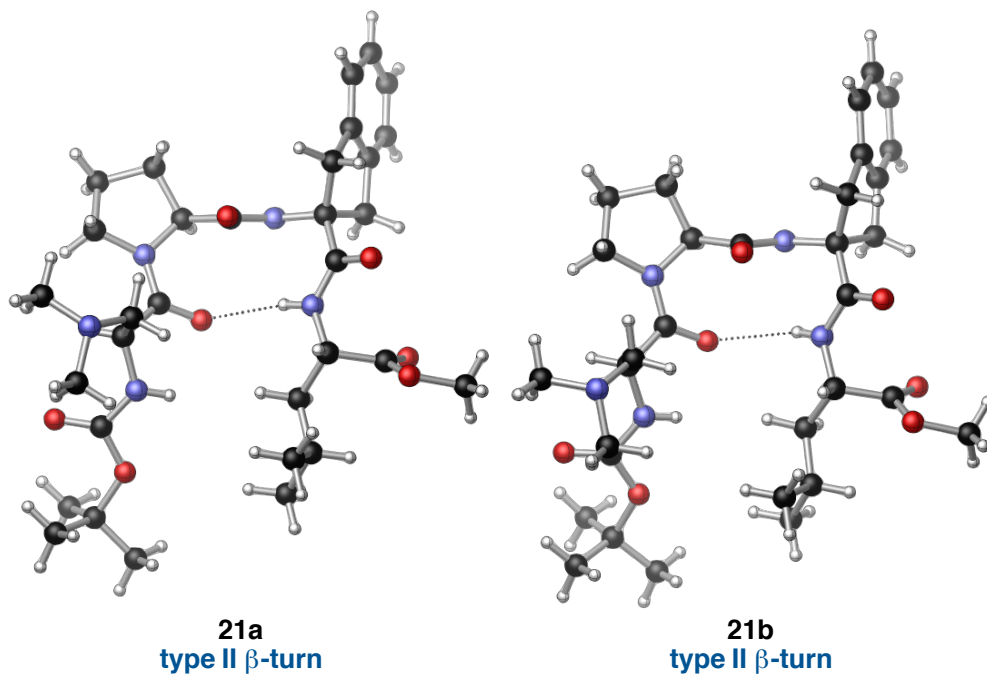

**Figure S3.22:** (a) The full numbering scheme of **21a,b** with 50% thermal ellipsoids. Most of the H-atoms have been omitted for clarity, while some are depicted as circles. (b) Images of **21a** and **21b** rendered separately using CYLview.



(a)

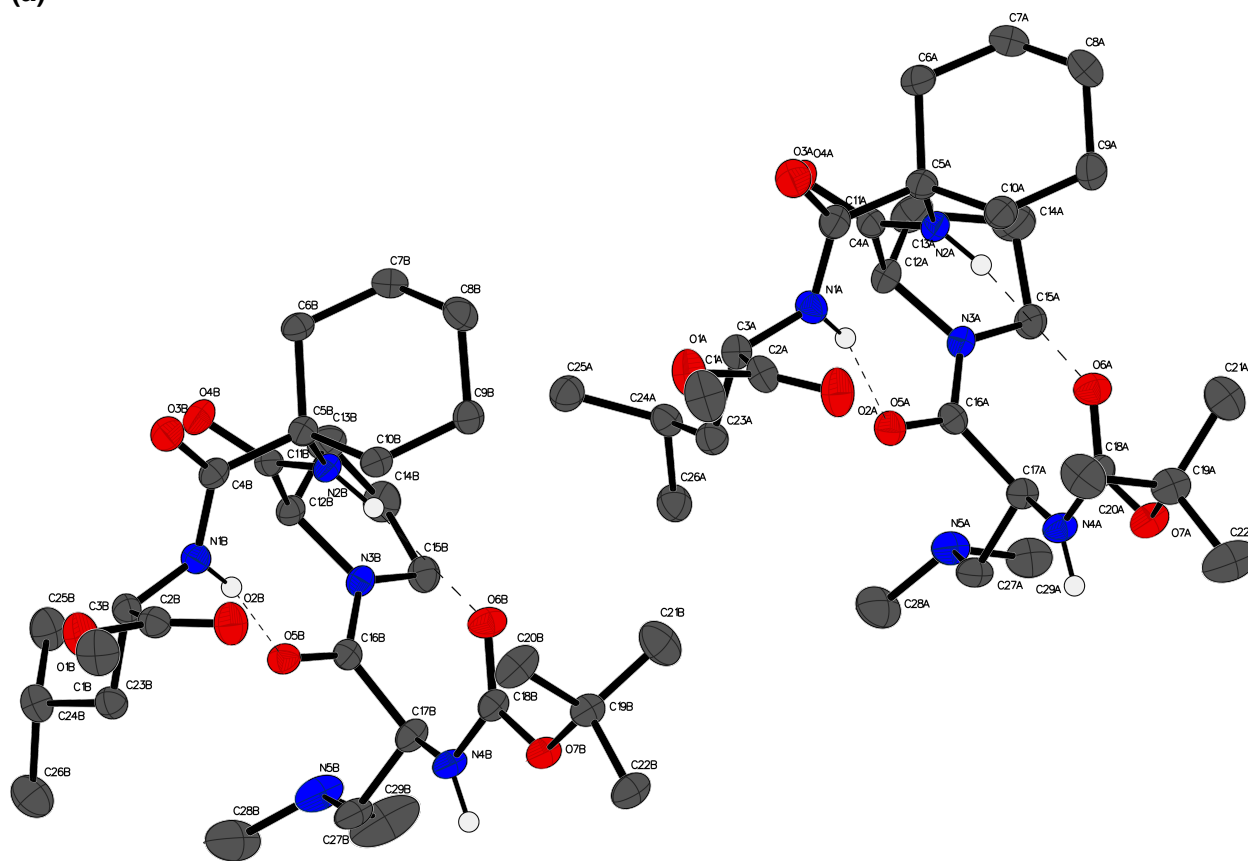

(b)

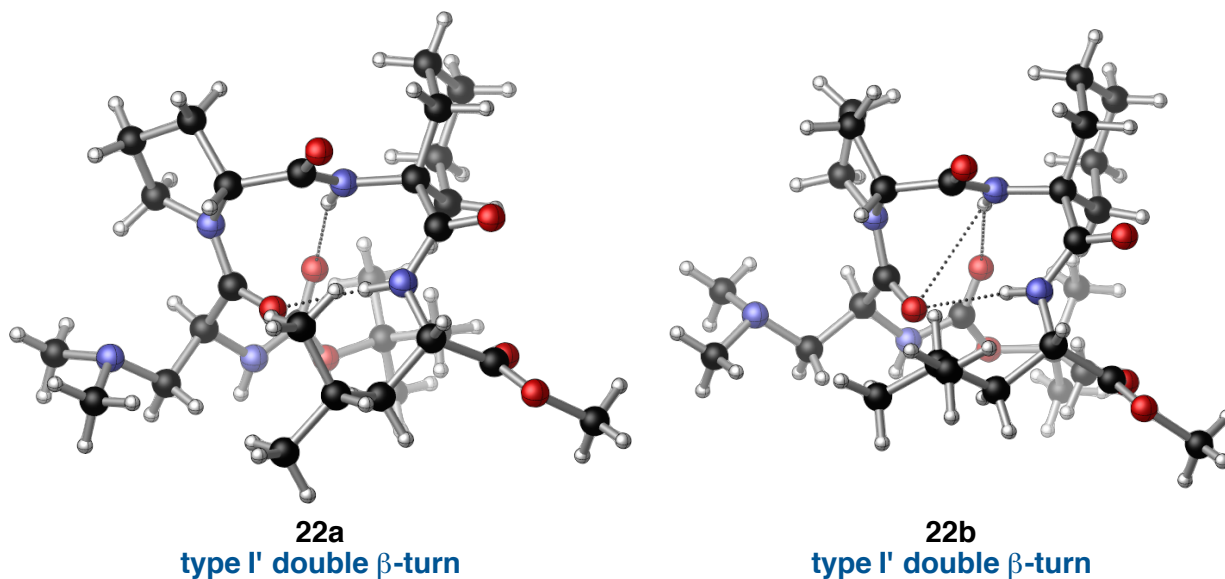

**Figure S3.23:** (a) The full numbering scheme of **22a,b** with 50% thermal ellipsoids. Most of the H-atoms have been omitted for clarity, while some are depicted as circles. Dashed lines highlight H-bonding interactions. (b) Images of **22a** and **22b** rendered separately using CYLview.

(a)

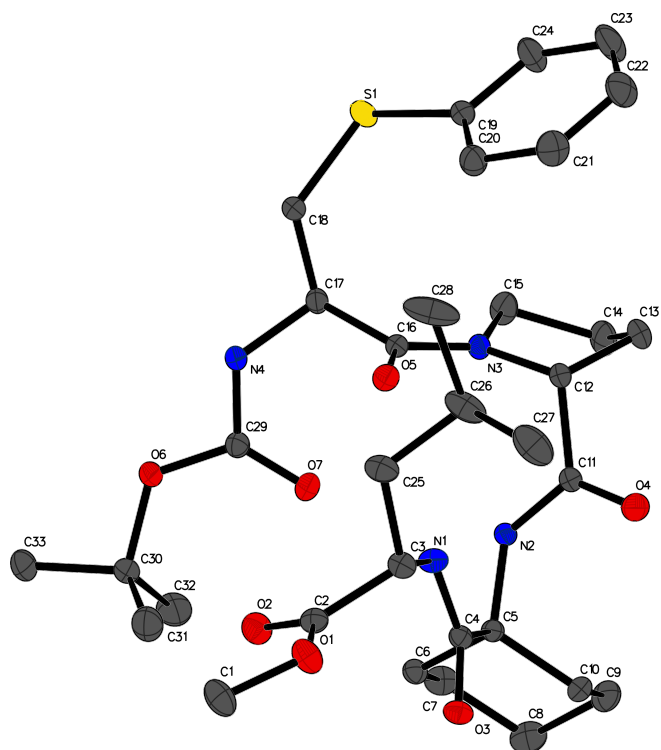

(b)

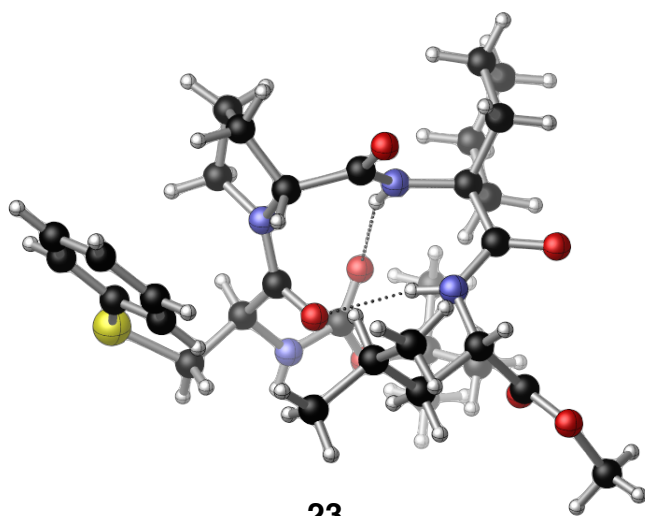

**23**

**type I' double  $\beta$ -turn**

**Figure S3.24:** (a) The full numbering scheme of **23** with 50% thermal ellipsoids. The H-atoms have been omitted for clarity. (b) Image of **23** rendered using CYLview.

(a)

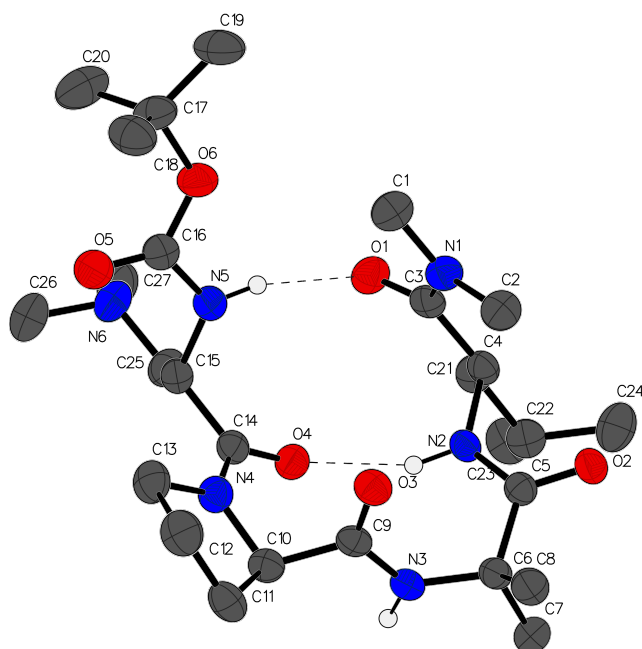

(b)

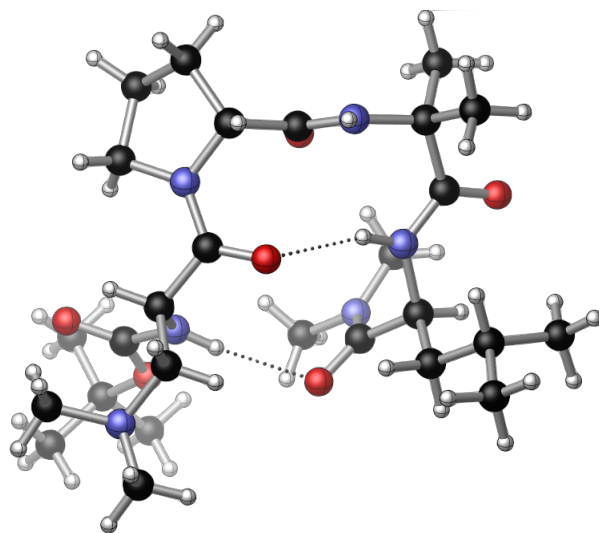

**24**  
type II'  $\beta$ -hairpin

**Figure S3.25:** (a) The full numbering scheme of **24** with 50% thermal ellipsoids. Most of the H-atoms have been omitted for clarity, while some are depicted as circles. Dashed lines highlight H-bonding interactions. (b) Image of **24** rendered using CYLview.

(a)

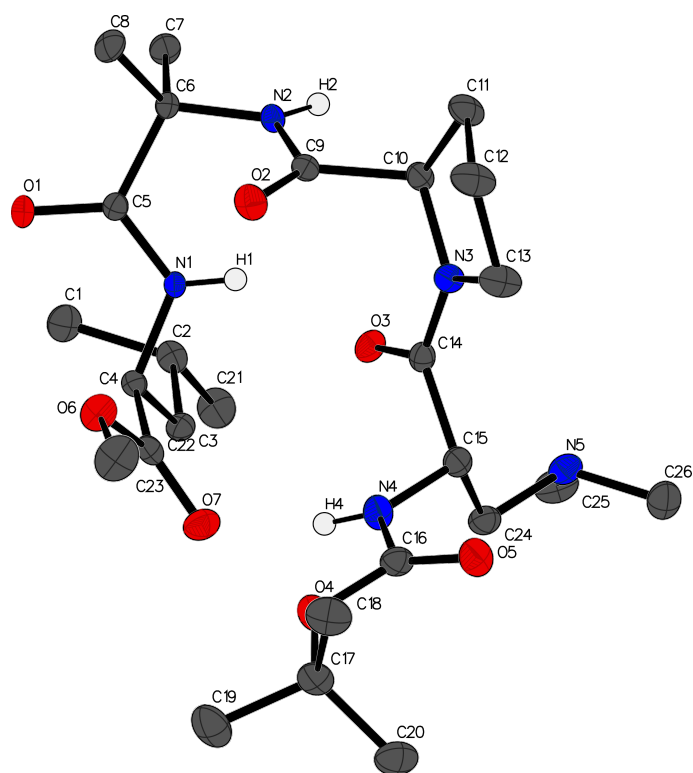

(b)

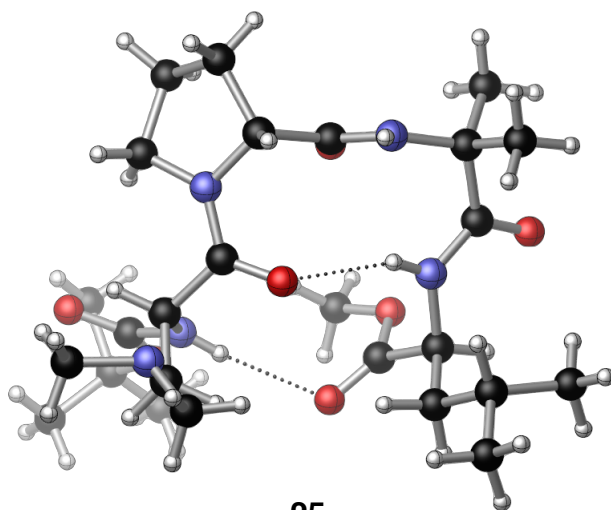

**25**  
type II'  $\beta$ -hairpin

**Figure S3.26:** (a) The full numbering scheme of **25** with 50% thermal ellipsoids. Most of the H-atoms have been omitted for clarity, while some are depicted as circles. (b) Image of **25** rendered using CYLview.

(a)

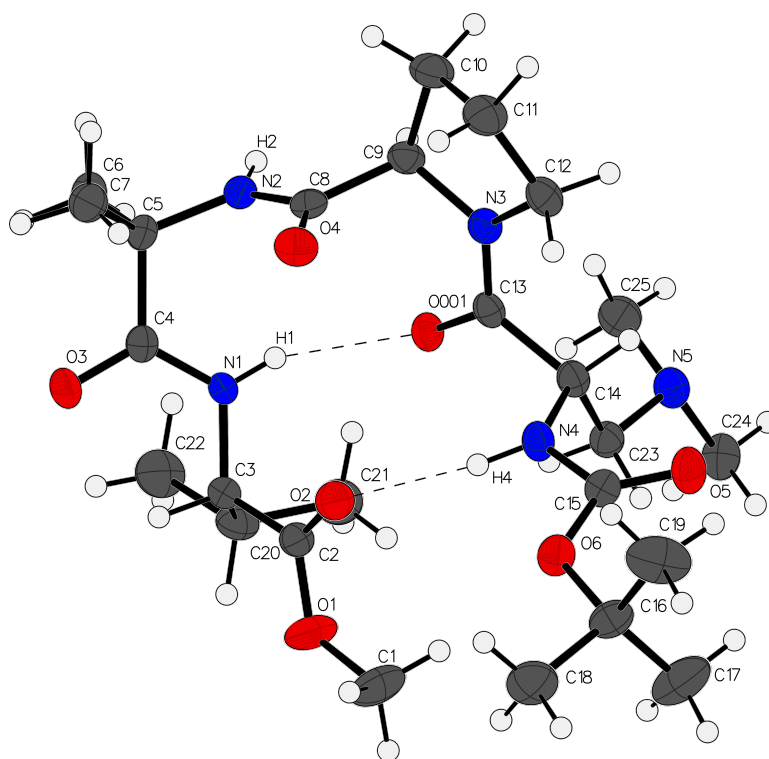

(b)

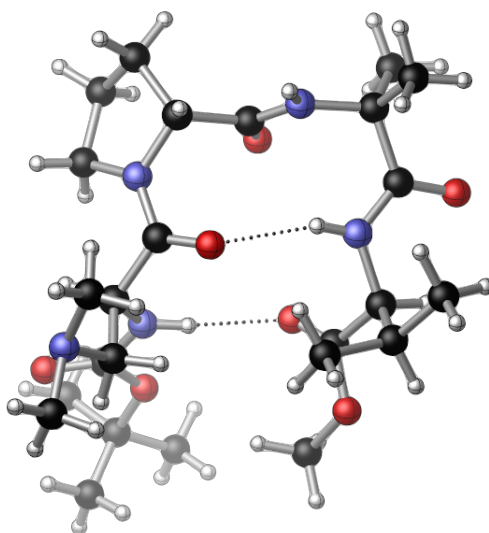

**26**  
**type II'  $\beta$ -hairpin**

**Figure S3.27:** (a) The full numbering scheme of **26** with 50% thermal ellipsoids. The H-atoms are depicted as circles for clarity. Dashed lines highlight H-bonding interactions. (b) Image of **26** rendered using CYLview.

(a)

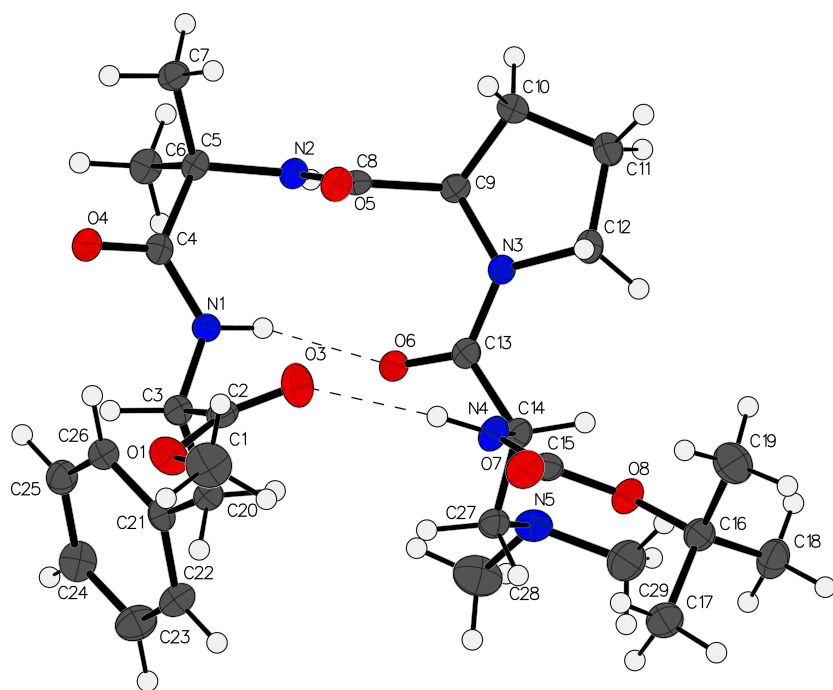

(b)

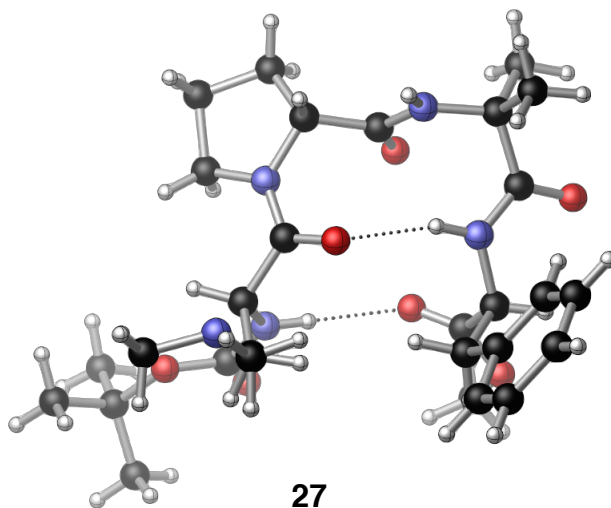

**27**  
**type II'  $\beta$ -hairpin**

**Figure S3.28:** (a) The full numbering scheme of **27** with 50% thermal ellipsoids. The H-atoms are depicted as circles for clarity. Dashed lines highlight H-bonding interactions. (b) Image of **27** rendered using CYLview.

(a)

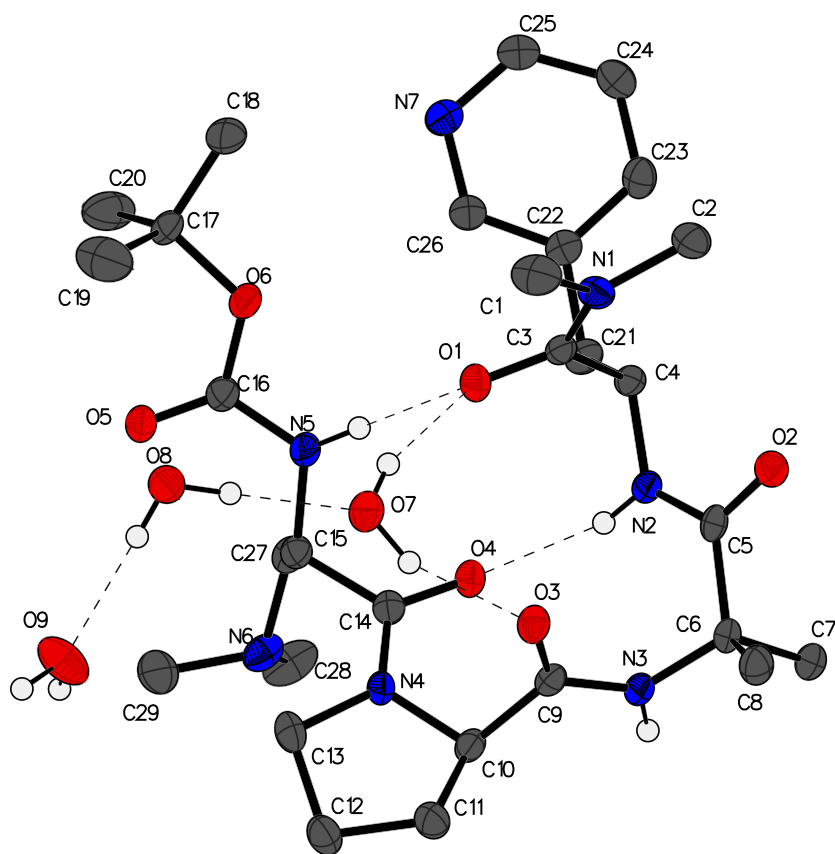

(b)

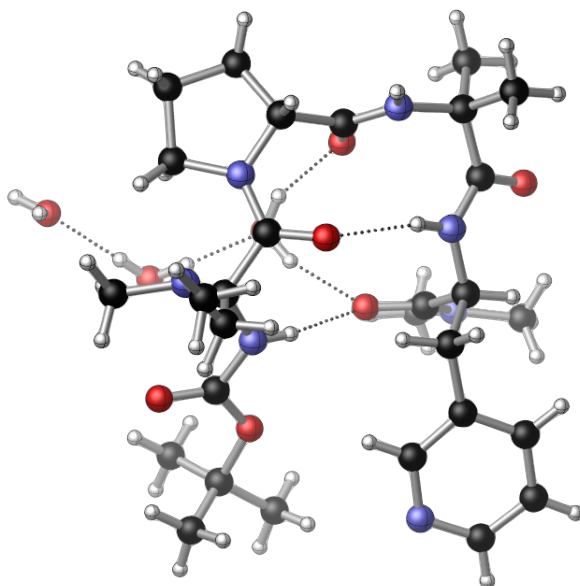

**28**  
type II'  $\beta$ -hairpin

**Figure S3.29:** (a) The full numbering scheme of **28** with 50% thermal ellipsoids. Most of the H-atoms have been omitted for clarity, while some are depicted as circles. Dashed lines highlight H-bonding interactions. (b) Image of **28** rendered using CYLview.

(a)

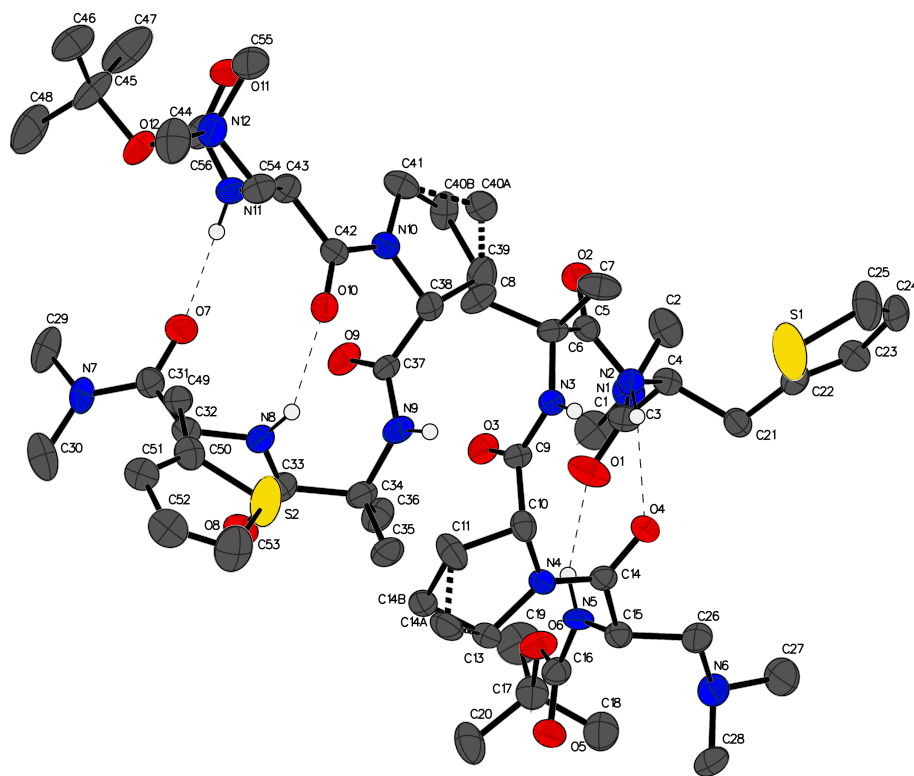

(b)

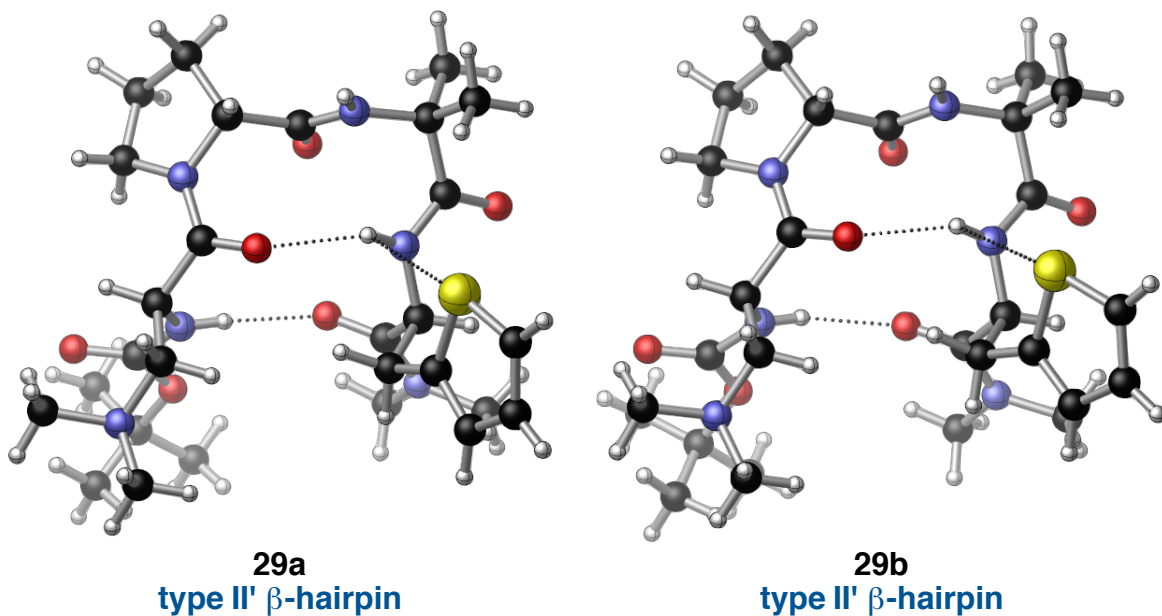

**Figure S3.30:** (a) The full numbering scheme of **29a,b** with 50% thermal ellipsoids. Most of the H-atoms have been omitted for clarity, while some are depicted as circles. Dashed lines highlight H-bonding interactions. (b) Images of **29a** and **29b** rendered separately using CYLview.



(a)

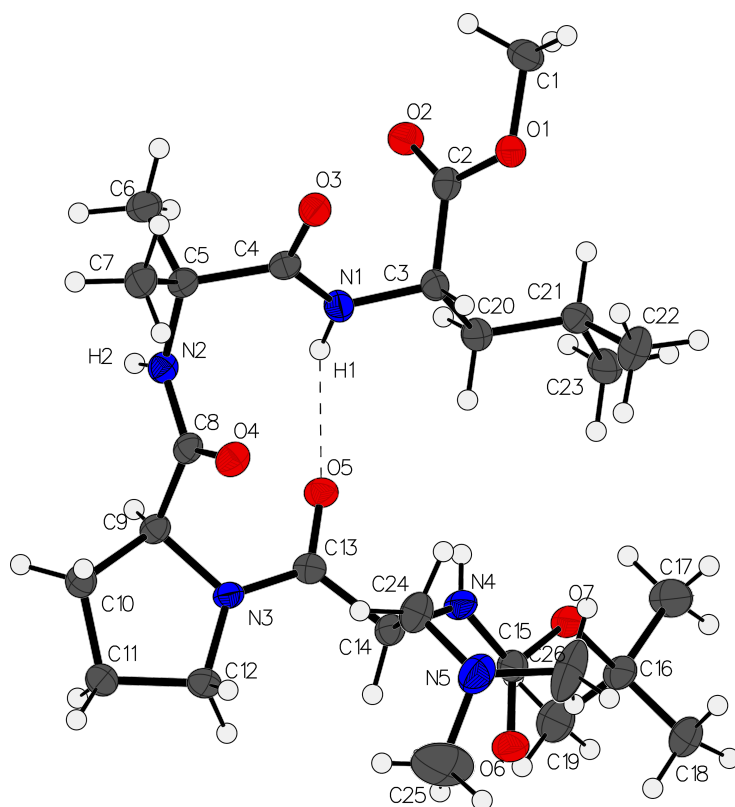

(b)

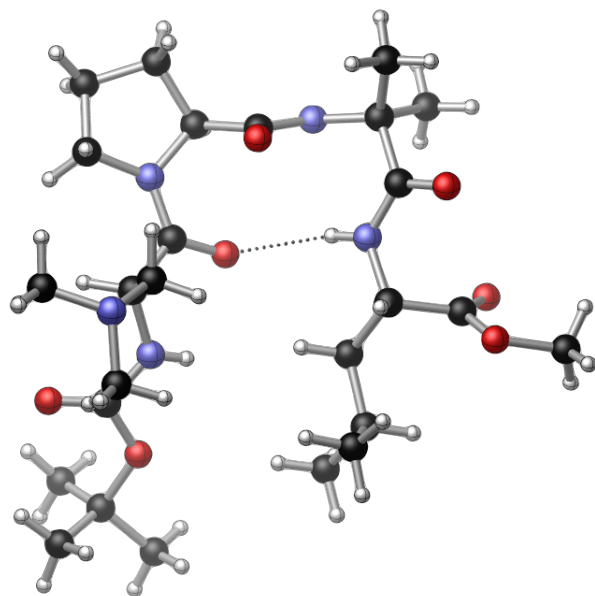

**30**  
type II  $\beta$ -turn

**Figure S3.31:** (a) The full numbering scheme of **30** with 50% thermal ellipsoids. The H-atoms are depicted as circles for clarity. Dashed lines highlight H-bonding interactions. (b) Image of **30** rendered using CYLview.

(a)

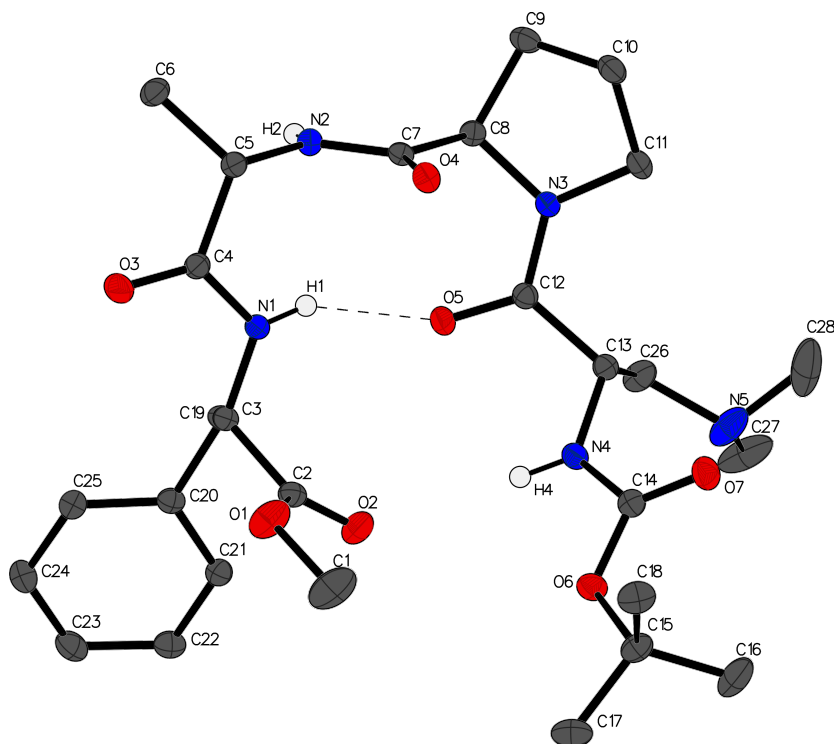

(b)

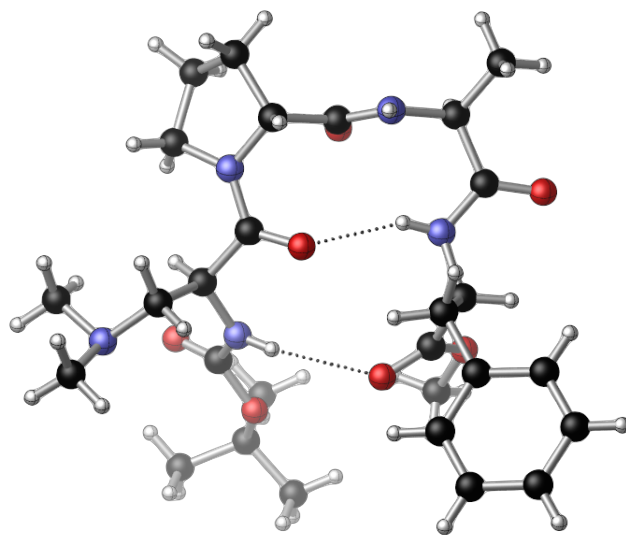

**31**  
type II'  $\beta$ -hairpin

**Figure S3.32:** (a) The full numbering scheme of **31** with 50% thermal ellipsoids. Most of the H-atoms have been omitted for clarity, while some are depicted as circles. Dashed lines highlight H-bonding interactions. (b) Image of **31** rendered using CYLview.

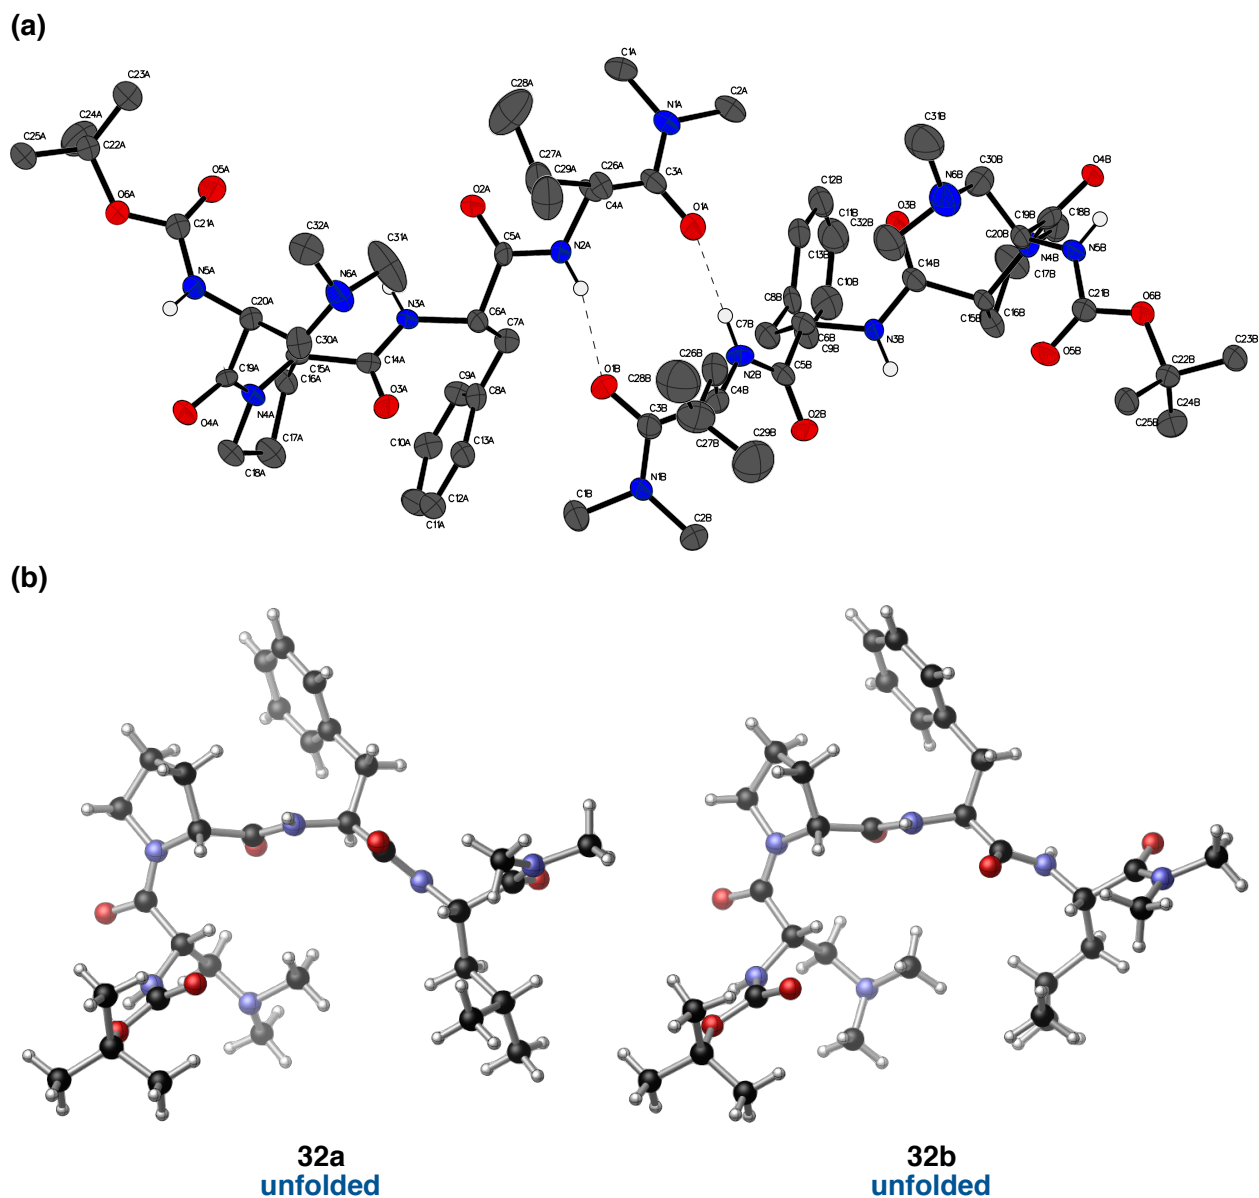

**Figure S3.33:** (a) The full numbering scheme of **32a,b** with 50% thermal ellipsoids. Most of the H-atoms have been omitted for clarity, while some are depicted as circles. Dashed lines highlight H-bonding interactions. (b) Images of **32a** and **32b** rendered separately using CYLview.

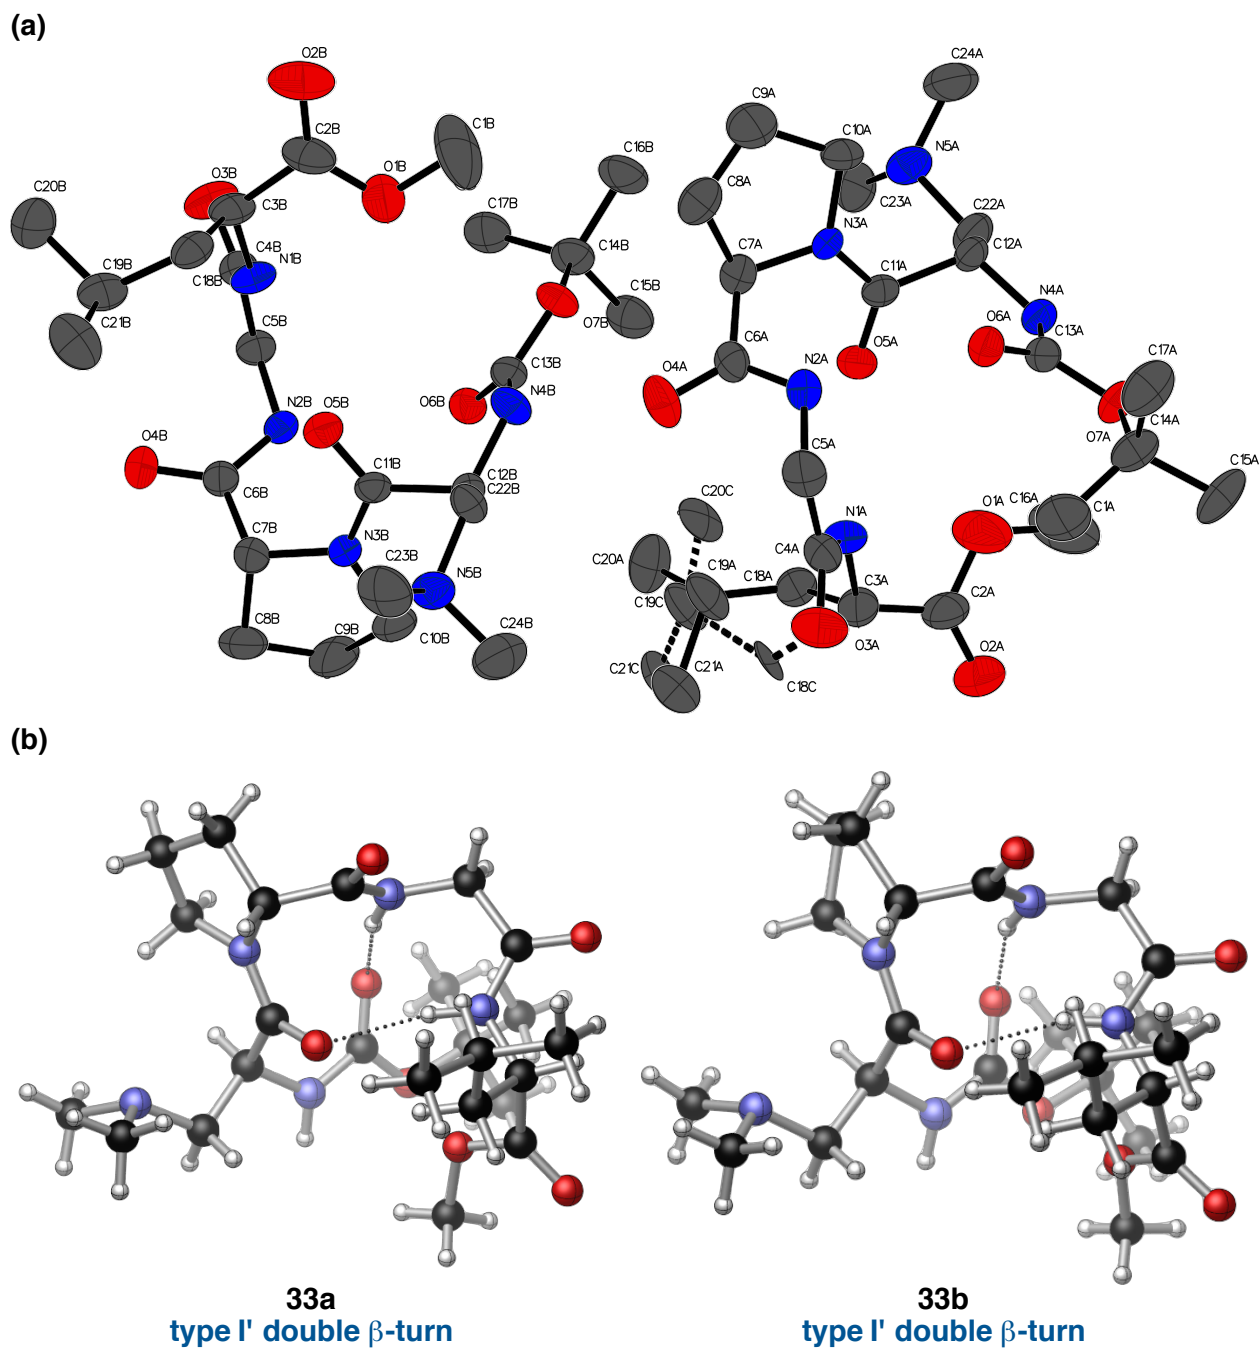

**Figure S3.34:** (a) The full numbering scheme of **33a,b** with 50% thermal ellipsoids. The H-atoms have been omitted for clarity. The dashed bonds highlight disordered positions. (b) Images of **33a** and **33b** rendered separately using CYLview.

(a)

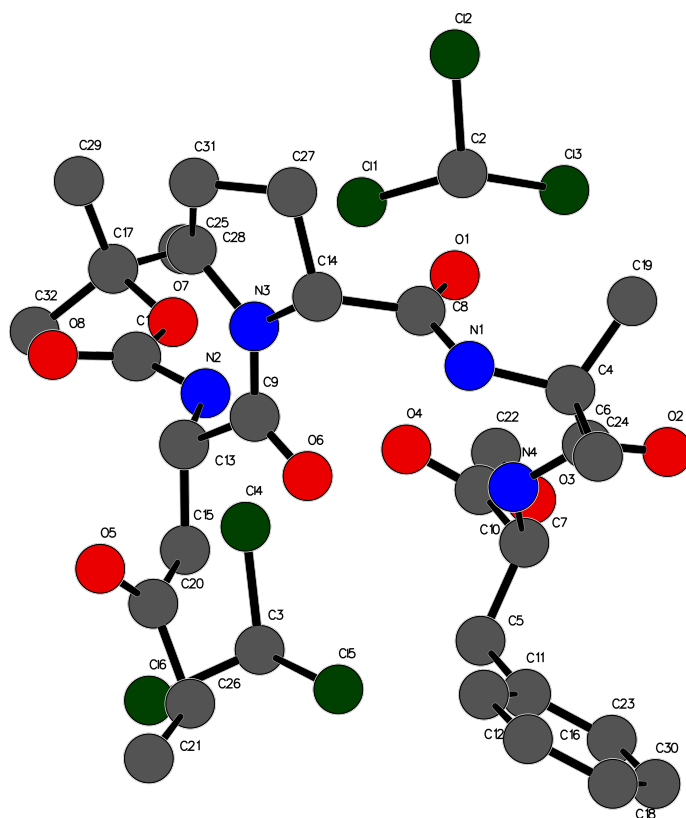

(b)

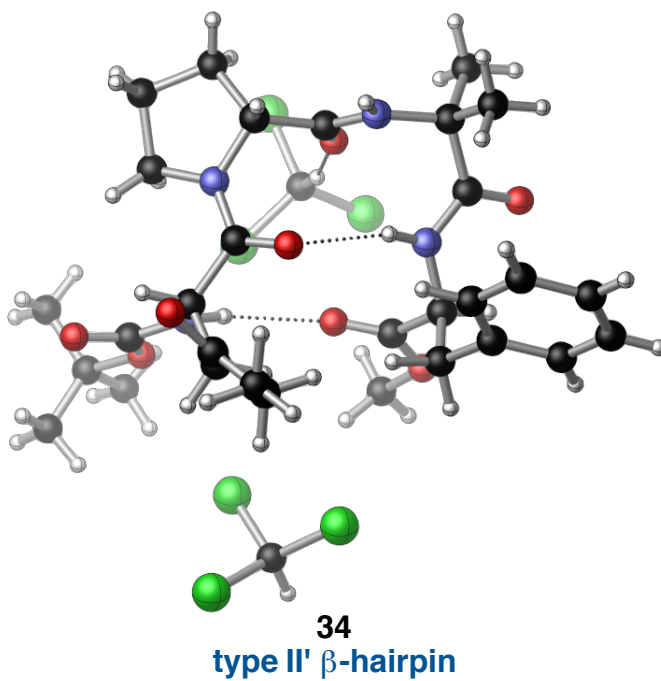

**Figure S3.35:** (a) The full numbering scheme of **34**.<sup>8</sup> The H-atoms have been omitted for clarity. (b) Image of **34** rendered using CYLview.

(a)

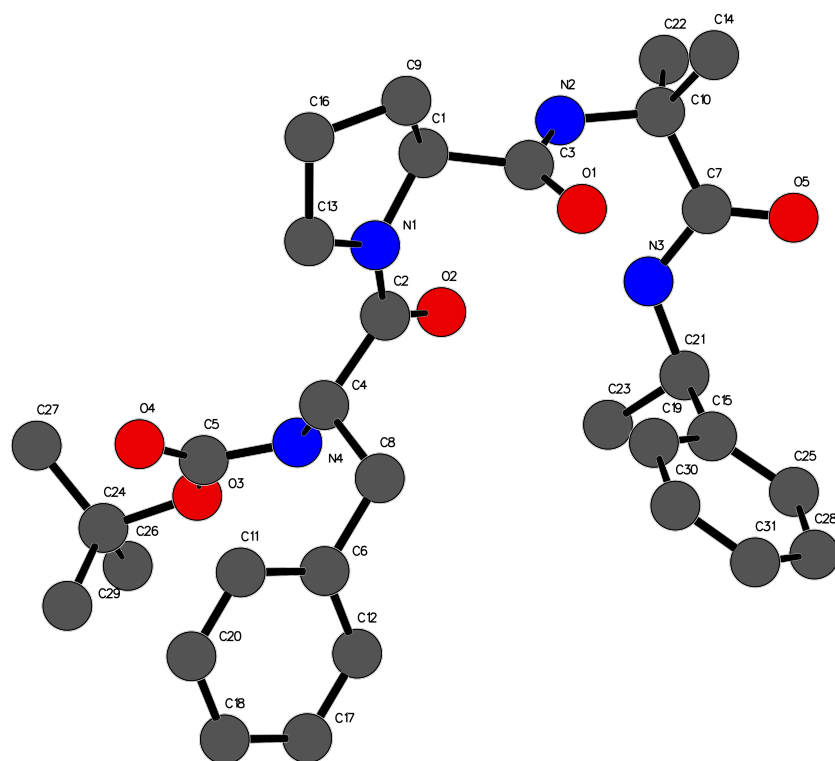

(b)

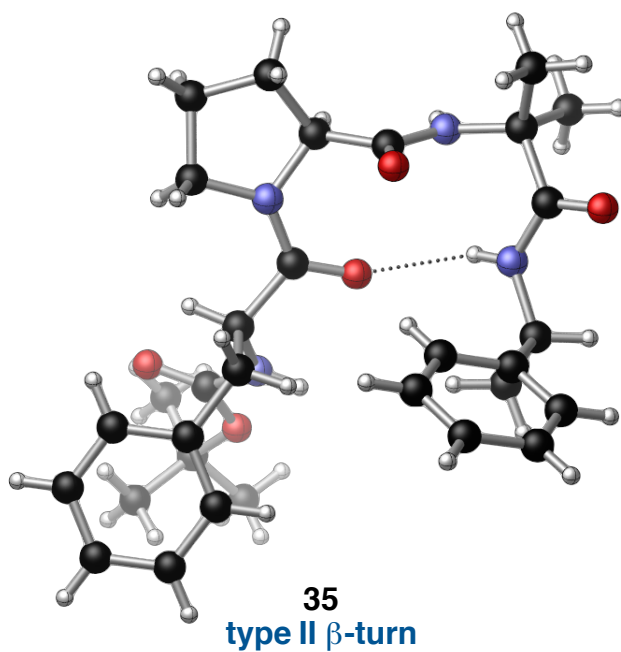

**Figure S3.36:** (a) The full numbering scheme of **35**.<sup>9</sup> The H-atoms have been omitted for clarity. (b) Image of **35** rendered using CYLview.

(a)

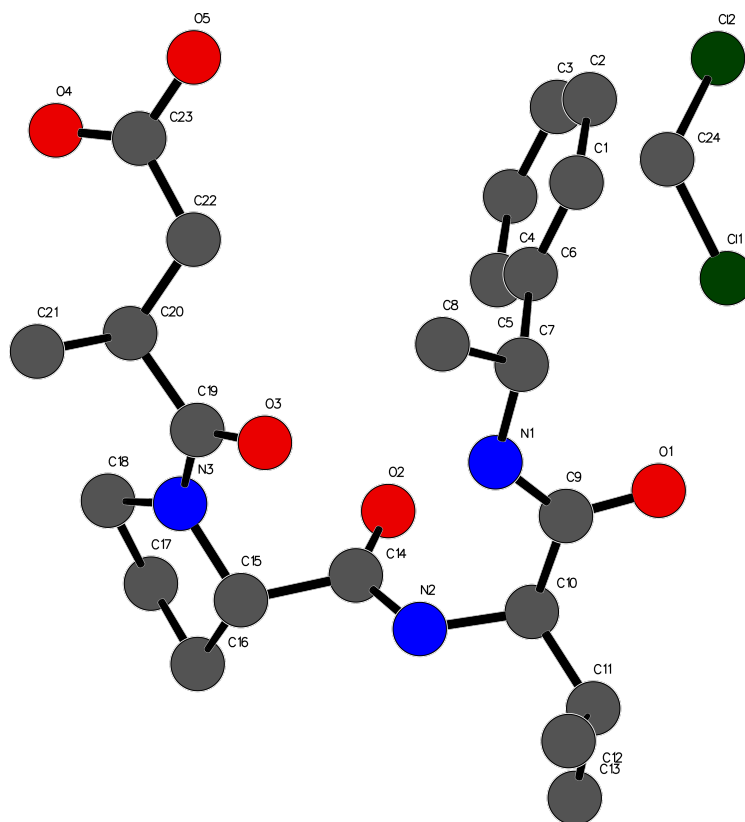

(b)

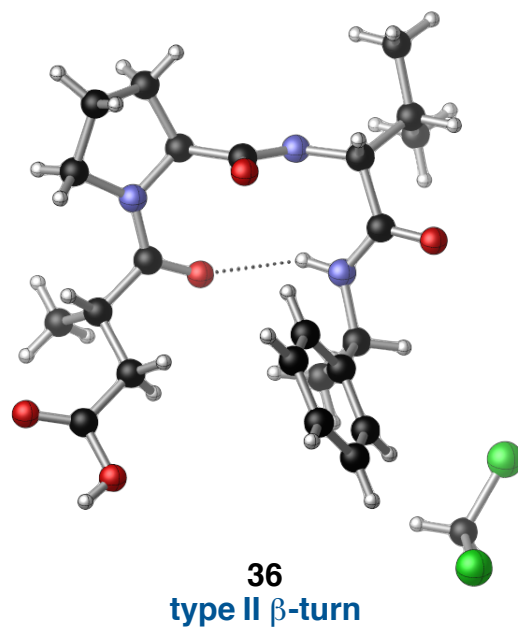

**Figure S3.37:** (a) The full numbering scheme of **36**.<sup>10</sup> The H-atoms have been omitted for clarity. (b) Image of **36** rendered using CYLview.

(a)

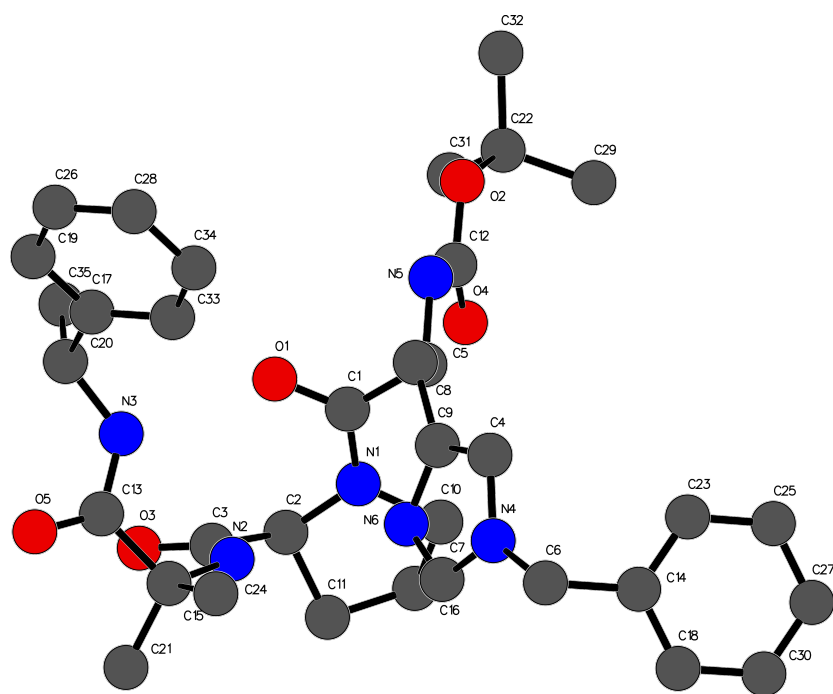

(b)

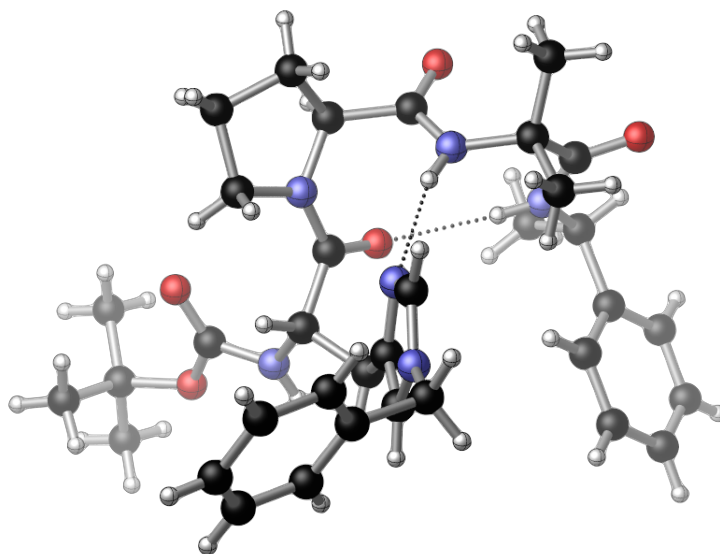

**37**  
type I' ASX-Pro turn

**Figure S3.38:** (a) The full numbering scheme of **37**.<sup>11</sup> The H-atoms have been omitted for clarity. (b) Image of **37** rendered using CYLview.



## IV. Analysis of X-Ray Crystal Structure Library

### A. General Information

In this section, we provide the data that was used to analyze various structural features of our peptide crystal structure library. Measurements were extracted from the crystallographic information files (.cif) using Mercury 3.8<sup>16</sup> and were subsequently tabulated in Microsoft Excel® spreadsheets. We note that all measurements were rounded to the nearest pre-error digit, and the error values were not considered for the purposes of these whole-library analyses. Mean values are presented with standard deviations. The median and range were also determined for all average measurements. Publication-quality plots were constructed using Prism 7.0a.<sup>17</sup>

### B. Analysis of Peptide Backbones

**Table S4.01:**  $\phi, \psi$  Dihedrals of Type II'  $\beta$ -Turns

| Type II' $\beta$ -Turns                                  | $\phi(i)$ | $\psi(i)$ | $\phi(i+1)$ | $\psi(i+1)$ | $\phi(i+2)$ | $\psi(i+2)$ | $\phi(i+3)$ | $\psi(i+3)$ |
|----------------------------------------------------------|-----------|-----------|-------------|-------------|-------------|-------------|-------------|-------------|
| Boc-Dmaa-D-Pro-Acpc-Leu-NMe <sub>2</sub> ( <b>3a</b> )   | -127.9    | 66.8      | 63.6        | -113.0      | -77.2       | -3.7        | -109.3      | 145.6       |
| Boc-Dmaa-D-Pro-Acpc-Leu-NMe <sub>2</sub> ( <b>3b</b> )   | -158.2    | 134.0     | 62.9        | -138.7      | -78.1       | -5.3        | -96.2       | 126.6       |
| Boc-Leu-D-Pro-Acpc-Leu-OMe ( <b>6</b> )                  | -141.0    | 148.1     | 50.8        | -134.1      | -80.6       | -5.9        | -108.3      | 57.5        |
| Boc-Dmaa-D-Pro-Acpc-Gly-OMe ( <b>7a</b> )                | -92.4     | 154.6     | 69.1        | -123.1      | -76.4       | -3.0        | 71.5        | -157.3      |
| Boc-Dmaa-D-Pro-Acpc-Nle-NMe <sub>2</sub> ( <b>8</b> )    | -151.5    | 83.3      | 62.0        | -130.1      | -74.4       | -5.5        | -96.9       | 117.6       |
| Boc-Dmaa-D-Pro-Acpc-Val-NMe <sub>2</sub> ( <b>9</b> )    | -156.4    | 79.9      | 58.0        | -133.0      | -70.5       | -10.3       | -101.3      | 112.9       |
| Boc-Dmaa-D-Pro-Acpc-Chg-NMe <sub>2</sub> ( <b>11</b> )   | -153.4    | 82.1      | 61.6        | -129.8      | -75.5       | -3.6        | -131.2      | 139.6       |
| Boc-Dmaa-D-Pro-Acpc-Phe-NMe <sub>2</sub> ( <b>12</b> )   | -152.5    | 77.2      | 63.6        | -125.7      | -72.0       | -9.2        | -90.8       | 135.5       |
| Boc-Dmaa-D-Pro-Acpc-Phe-OMe ( <b>13</b> )                | -136.9    | 147.3     | 58.6        | -136.9      | -84.3       | 8.8         | -129.0      | 81.9        |
| Boc-Dmaa-D-Pro-Acpc-D-Phe-NMe <sub>2</sub> ( <b>14</b> ) | -130.4    | 132.9     | 52.7        | -135.3      | -70.5       | -8.6        | 156.3       | -77.8       |
| Boc-Dmaa-D-Pro-Acbc-Leu-NMe <sub>2</sub> ( <b>16a</b> )  | -156.5    | 89.0      | 71.0        | -128.0      | -71.0       | -20.6       | -80.6       | 130.8       |
| Boc-Dmaa-D-Pro-Acbc-Leu-NMe <sub>2</sub> ( <b>16b</b> )  | -126.3    | 52.2      | 67.9        | -116.6      | -66.8       | -14.6       | -121.3      | 141.7       |
| Boc-Dmaa-D-Pro-Aic-D-Phe-NMe <sub>2</sub> ( <b>20a</b> ) | -171.1    | 127.1     | 57.6        | -134.6      | -59.0       | -31.4       | 54.2        | -131.6      |
| Boc-Dmaa-D-Pro-Aic-D-Phe-NMe <sub>2</sub> ( <b>20b</b> ) | -146.8    | 156.9     | 59.4        | -134.2      | -64.3       | -14.6       | 67.8        | -134.9      |
| Boc-Dmaa-D-Pro-Aib-Leu-NMe <sub>2</sub> ( <b>24</b> )    | -135.4    | 95.5      | 59.3        | -129.9      | -63.6       | -14.7       | -121.9      | 75.3        |
| Boc-Dmaa-D-Pro-Aib-Leu-OMe ( <b>25</b> )                 | -133.6    | 97.6      | 60.4        | -136.0      | -62.0       | -21.3       | -104.1      | 62.9        |
| Boc-Dmaa-D-Pro-Aib-Val-OMe ( <b>26</b> )                 | -159.2    | 90.1      | 63.1        | -133.7      | -68.1       | -13.6       | -118.5      | -168.4      |
| Boc-Dmaa-D-Pro-Aib-Phe-OMe ( <b>27</b> )                 | -152.9    | 79.1      | 54.4        | -127.3      | -58.5       | -26.2       | -87.8       | 148.0       |
| Boc-Dmaa-D-Pro-Aib-3-Pal-NMe <sub>2</sub> ( <b>28</b> )  | -162.9    | 122.8     | 52.6        | -129.3      | -59.9       | -23.5       | -81.9       | 112.4       |
| Boc-Dmaa-D-Pro-Aib-2-Thi-NMe <sub>2</sub> ( <b>29a</b> ) | -149.6    | 84.3      | 60.8        | -130.7      | -61.0       | -23.2       | -85.3       | 145.8       |
| Boc-Dmaa-D-Pro-Aib-2-Thi-NMe <sub>2</sub> ( <b>29b</b> ) | -150.5    | 77.1      | 61.7        | -132.1      | -60.3       | -22.5       | -89.4       | 144.4       |
| Boc-Dmaa-D-Pro-Ala-Phe-OMe ( <b>31</b> )                 | -136.5    | 147.7     | 60.1        | -139.6      | -93.4       | 22.5        | -130.3      | 81.9        |
| Boc-Keto-D-Pro-Aib-Phe-OMe ( <b>34</b> )                 | -138.5    | 63.4      | 62.1        | -123.7      | -61.4       | -19.7       | -108.9      | 140.7       |
| <b>average</b>                                           | -144.4    | 103.9     | 60.6        | -130.2      | -69.9       | -11.7       | -71.4       | 62.2        |
| <b>st. dev.</b>                                          | 16.5      | 33.0      | 5.0         | 6.6         | 9.1         | 12.0        | 78.0        | 110.2       |
| <b>median</b>                                            | -149.6    | 90.1      | 60.8        | -130.7      | -70.5       | -13.6       | -96.9       | 112.9       |
| <b>minimum</b>                                           | -171.1    | 52.2      | 50.8        | -139.6      | -93.4       | -31.4       | -131.2      | -168.4      |
| <b>maximum</b>                                           | -92.4     | 156.9     | 71.0        | -113.0      | -58.5       | 22.5        | 156.3       | 148.0       |
| <b>count</b>                                             | 23        | 23        | 23          | 23          | 23          | 23          | 23          | 23          |

**Table S4.02:**  $\phi, \psi$  Dihedrals of Type II  $\beta$ -Turns

| Type II $\beta$ -Turns                  | $\phi(i)$ | $\psi(i)$ | $\phi(i+1)$ | $\psi(i+1)$ | $\phi(i+2)$ | $\psi(i+2)$ | $\phi(i+3)$ | $\psi(i+3)$ |
|-----------------------------------------|-----------|-----------|-------------|-------------|-------------|-------------|-------------|-------------|
| Boc-Dmaa-Pro-Acpc-Leu-OMe (15)          | -89.6     | 158.0     | -51.0       | 132.3       | 76.8        | -0.1        | -142.5      | 81.6        |
| Boc-Dmaa-Pro-Aic-Leu-OMe (21a)          | -129.4    | 161.3     | -51.3       | 137.4       | 62.5        | 26.8        | -55.3       | 136.3       |
| Boc-Dmaa-Pro-Aic-Leu-OMe (21b)          | -139.2    | 165.1     | -54.3       | 140.0       | 61.6        | 28.6        | -53.4       | 137.7       |
| Boc-Dmaa-Pro-Aib-Leu-OMe (30)           | -138.7    | 159.8     | -52.0       | 138.0       | 63.5        | 22.9        | -55.1       | 136.6       |
| Boc-Phe-Pro-Aib-(R)- $\alpha$ -Mba (35) | -127.2    | 144.5     | -51.3       | 127.9       | 61.6        | 24.8        | N/A         | N/A         |
| 2-Msa-Pro-D-Val-(R)- $\alpha$ -Mba (36) | N/A       | N/A       | -60.6       | 139.1       | 79.8        | 3.6         | N/A         | N/A         |
| <b>average</b>                          | -124.8    | 157.7     | -53.4       | 135.8       | 67.6        | 17.8        | -76.6       | 123.1       |
| <b>st. dev.</b>                         | 20.4      | 7.8       | 3.7         | 4.7         | 8.3         | 12.6        | 44.0        | 27.6        |
| <b>median</b>                           | -129.4    | 159.8     | -51.7       | 137.7       | 63.0        | 23.9        | -55.2       | 136.5       |
| <b>minimum</b>                          | -139.2    | 19.0      | -60.6       | 127.9       | 7.3         | -0.1        | -142.5      | -175.9      |
| <b>maximum</b>                          | -89.6     | 165.1     | -51.0       | 140.0       | 79.8        | 28.6        | -53.4       | 137.7       |
| <b>count</b>                            | 5         | 5         | 6           | 6           | 6           | 6           | 4           | 4           |

**Table S4.03:**  $\phi, \psi$  Dihedrals of Type I'  $\beta$ -Turns

| Type I' $\beta$ -Turns                         | $\phi(i)$ | $\psi(i)$ | $\phi(i+1)$ | $\psi(i+1)$ | $\phi(i+2)$ | $\psi(i+2)$ | $\phi(i+3)$ | $\psi(i+3)$ |
|------------------------------------------------|-----------|-----------|-------------|-------------|-------------|-------------|-------------|-------------|
| Boc-Dmaa-D-Pro-Acpc-Leu-NMe <sub>2</sub> (3c)  | -56.8     | 132.6     | 64.3        | 15.2        | 71.9        | 14.9        | -110.3      | 118.9       |
| Boc-Dmaa-D-Pro-Acpc-Leu-OMe (4a)               | -57.8     | 133.4     | 62.4        | 17.7        | 72.7        | 11.9        | -119.3      | 171.1       |
| Boc-Dmaa-D-Pro-Acpc-Leu-OMe (4b)               | -59.4     | 135.2     | 61.1        | 21.8        | 71.0        | 11.4        | -90.7       | 150.4       |
| Boc-Dmaa-D-Pro-Acpc-Leu-OMe (4c)               | -54.1     | 131.8     | 63.8        | 12.6        | 71.7        | 12.3        | -65.1       | 152.2       |
| Boc-Dmaa-D-Pro-Acpc-Leu-OMe (4d)               | -58.9     | 137.7     | 61.6        | 19.3        | 73.0        | 10.9        | -96.2       | 152.3       |
| Boc-Dmaa-D-Pro-Acpc-Leu-OMe (4e)               | -54.8     | 132.5     | 62.8        | 13.3        | 74.6        | 15.1        | -135.7      | 178.3       |
| Boc-Cys(Ph)-D-Pro-Acpc-Leu-OMe (5)             | -58.3     | 128.5     | 69.5        | 13.7        | 75.1        | 6.9         | -82.9       | 172.1       |
| Boc-Dmaa-D-Pro-Acpc-Gly-OMe (7b)               | -60.9     | 132.8     | 67.9        | 15.8        | 73.5        | 11.7        | -104.1      | -156.7      |
| Boc-Dmaa-D-Pro-Acpc-Val-OMe (10)               | -56.2     | 136.3     | 61.8        | 13.4        | 75.4        | 6.0         | -74.3       | 144.4       |
| Boc-Dmaa-D-Pro-Acbc-Leu-NMe <sub>2</sub> (16c) | -55.0     | 133.0     | 65.7        | 14.2        | 67.1        | 28.7        | -120.0      | 97.6        |
| Boc-Dmaa-D-Pro-Acbc-Leu-OMe (17a)              | -51.7     | 133.3     | 63.6        | 14.6        | 65.0        | 26.1        | -62.9       | 144.5       |
| Boc-Dmaa-D-Pro-Acbc-Leu-OMe (17b)              | -55.4     | 129.7     | 65.0        | 17.9        | 66.2        | 20.8        | -63.1       | 147.1       |
| Boc-Dmaa-D-Pro-Cle-Leu-OMe (18a)               | -54.7     | 130.0     | 67.8        | 18.0        | 63.6        | 20.9        | -63.0       | 147.8       |
| Boc-Dmaa-D-Pro-Cle-Leu-OMe (18b)               | -52.0     | 133.2     | 61.4        | 19.7        | 62.3        | 24.9        | -61.8       | 144.0       |
| Boc-Dmaa-D-Pro-Aic-Leu-OMe (19a)               | -49.2     | 133.4     | 71.2        | 17.1        | 59.3        | 37.1        | -99.8       | 41.1        |
| Boc-Dmaa-D-Pro-Aic-Leu-OMe (19b)               | 50.3      | 46.3      | 62.4        | 29.0        | 67.3        | 17.1        | -117.8      | -175.9      |
| Boc-Dmaa-D-Pro-Achc-Leu-OMe (22a)              | -54.1     | 128.4     | 61.3        | 16.7        | 56.1        | 30.7        | -62.6       | 155.2       |
| Boc-Dmaa-D-Pro-Achc-Leu-OMe (22b)              | -55.6     | 132.0     | 71.1        | 12.4        | 55.9        | 29.6        | -70.6       | 150.0       |
| Boc-Cys(Ph)-D-Pro-Achc-Leu-OMe (23)            | -59.3     | 134.9     | 77.6        | 0.8         | 65.4        | 12.3        | -65.7       | 154.3       |
| Boc-Dmaa-D-Pro-Gly-Leu-OMe (33a)               | -52.3     | 126.8     | 62.0        | 18.1        | 82.9        | 6.7         | -120.8      | -32.4       |
| Boc-Dmaa-D-Pro-Gly-Leu-OMe (33b)               | -53.5     | 125.5     | 66.7        | 14.8        | 81.1        | 4.1         | -100.2      | -28.7       |
| <b>average</b>                                 | -50.5     | 128.0     | 65.3        | 16.0        | 69.1        | 17.1        | -89.9       | 96.6        |
| <b>st. dev.</b>                                | 23.3      | 19.0      | 4.3         | 5.1         | 7.3         | 9.3         | 24.5        | 105.6       |
| <b>median</b>                                  | -55.0     | 132.6     | 63.8        | 15.8        | 71.0        | 14.9        | -90.7       | 147.1       |
| <b>minimum</b>                                 | -60.9     | 46.3      | 61.1        | 0.8         | 55.9        | 4.1         | -135.7      | -175.9      |
| <b>maximum</b>                                 | 50.3      | 137.7     | 77.6        | 29.0        | 82.9        | 37.1        | -61.8       | 178.3       |
| <b>count</b>                                   | 21        | 21        | 21          | 21          | 21          | 21          | 21          | 21          |

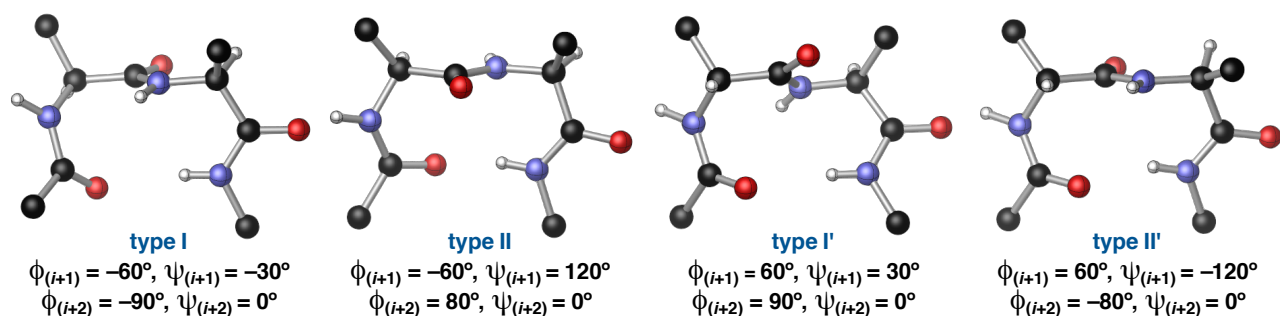

**Figure S4.01:** The canonical  $\beta$ -turn motifs loop and dihedrals describing them.<sup>18</sup>

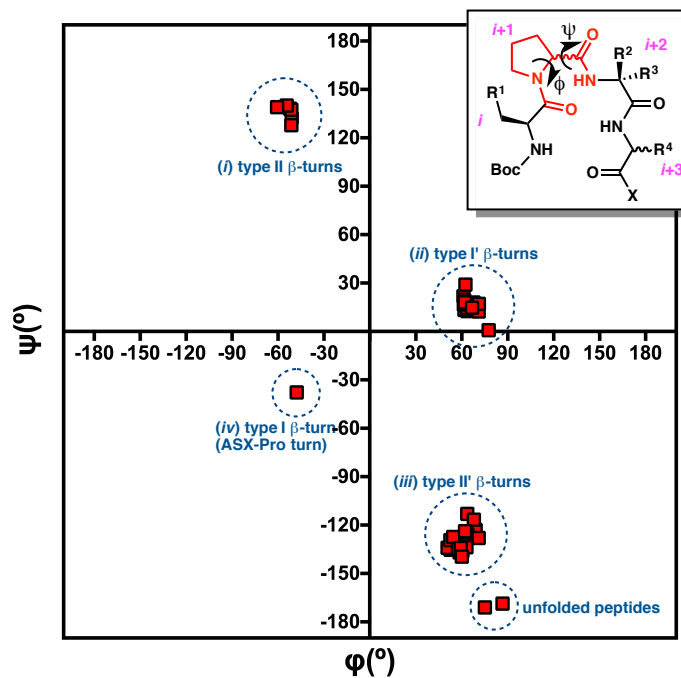

**Figure S4.02:** Ramachandran plot showing  $\phi, \psi$  dihedrals of  $i+1$  position for all 35 peptides (reproduced from Figure 11b in the manuscript).

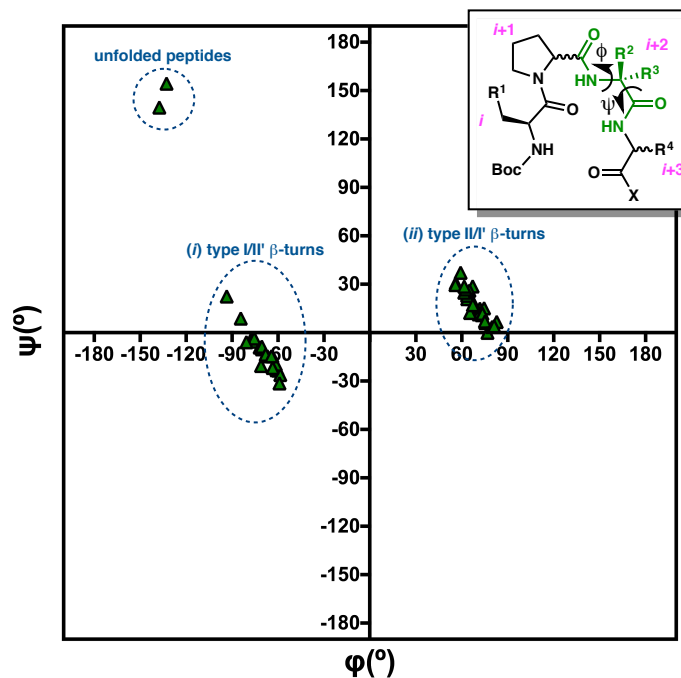

**Figure S4.03:** Ramachandran plot showing  $\phi, \psi$  dihedrals of  $i+2$  position for all 35 peptides (reproduced from Figure 11c in the manuscript).

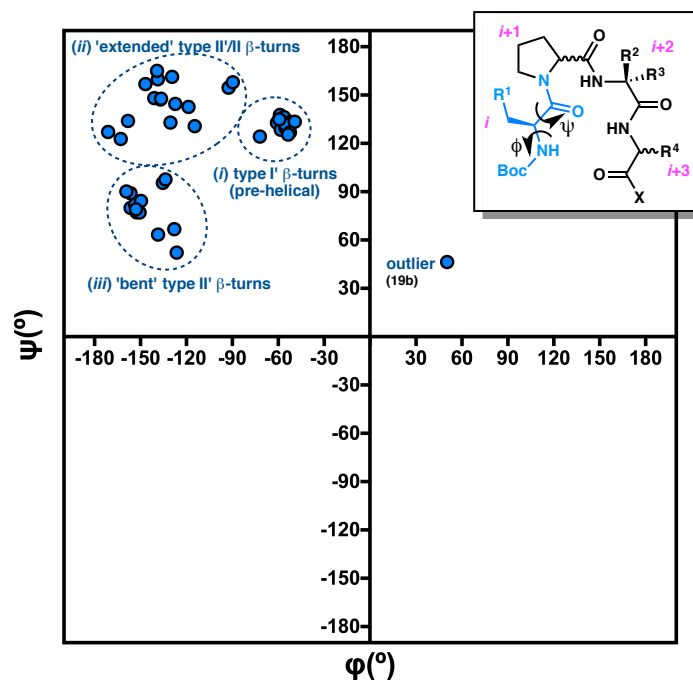

**Figure S4.04:** Ramachandran plot showing  $\phi, \psi$  dihedrals of  $i$  position for all peptides except peptide **36**, which has a backbone-modified  $i$  residue (reproduced from Figure 11a in the manuscript).

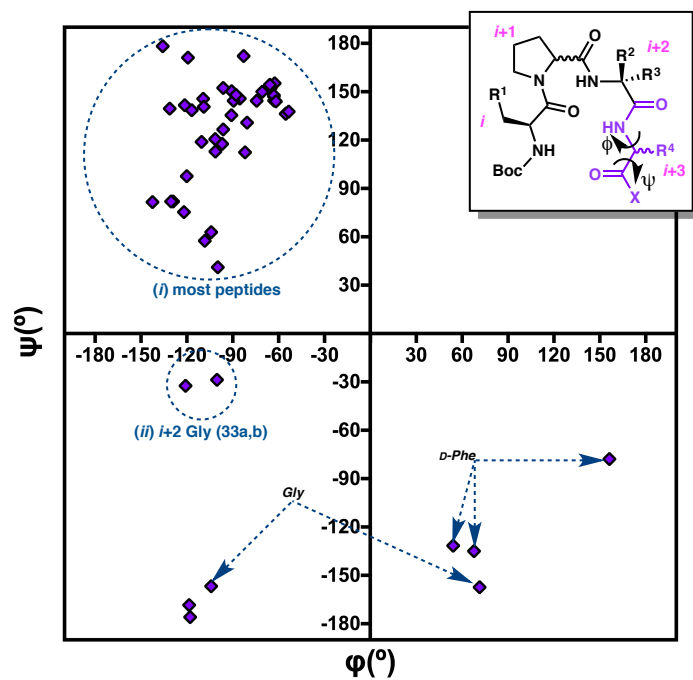

**Figure S4.05:** Ramachandran plot showing  $\phi, \psi$  dihedrals of  $i+3$  position for all peptides except **35–37**, those without  $i+3$  residues (reproduced from Figure 11d in the manuscript).

**Table S4.04:** Deviation from 3<sub>10</sub>-Helical Dihedrals ( $\phi, \psi = 49^\circ, 26^\circ$ ) in Type I' Loop Regions<sup>19</sup>

| Deviation from 3 <sub>10</sub> -helix (loop region)     | $\phi(i+1)$ | $\Delta\phi(i+1)$ | $\psi(i+1)$ | $\Delta\psi(i+1)$ | $\phi(i+2)$ | $\Delta\phi(i+2)$ | $\psi(i+2)$ | $\Delta\psi(i+2)$ |
|---------------------------------------------------------|-------------|-------------------|-------------|-------------------|-------------|-------------------|-------------|-------------------|
| Boc-Dmaa-D-Pro-Acpc-Leu-NMe <sub>2</sub> ( <b>3c</b> )  | 64.3        | 15.3              | 15.2        | -10.8             | 71.9        | 22.9              | 14.9        | -11.1             |
| Boc-Dmaa-D-Pro-Acpc-Leu-OMe ( <b>4a</b> )               | 62.4        | 13.4              | 17.7        | -8.3              | 72.7        | 23.7              | 11.9        | -14.1             |
| Boc-Dmaa-D-Pro-Acpc-Leu-OMe ( <b>4b</b> )               | 61.1        | 12.1              | 21.8        | -4.2              | 71.0        | 22.0              | 11.4        | -14.6             |
| Boc-Dmaa-D-Pro-Acpc-Leu-OMe ( <b>4c</b> )               | 63.8        | 14.8              | 12.6        | -13.4             | 71.7        | 22.7              | 12.3        | -13.7             |
| Boc-Dmaa-D-Pro-Acpc-Leu-OMe ( <b>4d</b> )               | 61.6        | 12.6              | 19.3        | -6.7              | 73.0        | 24.0              | 10.9        | -15.1             |
| Boc-Dmaa-D-Pro-Acpc-Leu-OMe ( <b>4e</b> )               | 62.8        | 13.8              | 13.3        | -12.7             | 74.6        | 25.6              | 15.1        | -10.9             |
| Boc-Cys(Ph)-D-Pro-Acpc-Leu-OMe ( <b>5</b> )             | 69.5        | 20.5              | 13.7        | -12.3             | 75.1        | 26.1              | 6.9         | -19.1             |
| Boc-Dmaa-D-Pro-Acpc-Gly-OMe ( <b>7b</b> )               | 67.9        | 18.9              | 15.8        | -10.2             | 73.5        | 24.5              | 11.7        | -14.3             |
| Boc-Dmaa-D-Pro-Acpc-Val-OMe ( <b>10</b> )               | 61.8        | 12.8              | 13.4        | -12.6             | 75.4        | 26.4              | 6.0         | -20.0             |
| Boc-Dmaa-D-Pro-Acbc-Leu-NMe <sub>2</sub> ( <b>16c</b> ) | 65.7        | 16.7              | 14.2        | -11.8             | 67.1        | 18.1              | 28.7        | 2.7               |
| Boc-Dmaa-D-Pro-Acbc-Leu-OMe ( <b>17a</b> )              | 63.6        | 14.6              | 14.6        | -11.4             | 65.0        | 16.0              | 26.1        | 0.1               |
| Boc-Dmaa-D-Pro-Acbc-Leu-OMe ( <b>17b</b> )              | 65.0        | 16.0              | 17.9        | -8.1              | 66.2        | 17.2              | 20.8        | -5.2              |
| Boc-Dmaa-D-Pro-Cle-Leu-OMe ( <b>18a</b> )               | 67.8        | 18.8              | 18.0        | -8.0              | 63.6        | 14.6              | 20.9        | -5.1              |
| Boc-Dmaa-D-Pro-Cle-Leu-OMe ( <b>18b</b> )               | 61.4        | 12.4              | 19.7        | -6.3              | 62.3        | 13.3              | 24.9        | -1.1              |
| Boc-Dmaa-D-Pro-Aic-Leu-OMe ( <b>19a</b> )               | 71.2        | 22.2              | 17.1        | -8.9              | 59.3        | 10.3              | 37.1        | 11.1              |
| Boc-Dmaa-D-Pro-Aic-Leu-OMe ( <b>19b</b> )               | 62.4        | 13.4              | 29.0        | 3.0               | 67.3        | 18.3              | 17.1        | -8.9              |
| Boc-Dmaa-D-Pro-Achc-Leu-OMe ( <b>22a</b> )              | 61.3        | 12.3              | 16.7        | -9.3              | 56.1        | 7.1               | 30.7        | 4.7               |
| Boc-Dmaa-D-Pro-Achc-Leu-OMe ( <b>22b</b> )              | 71.1        | 22.1              | 12.4        | -13.6             | 55.9        | 6.9               | 29.6        | 3.6               |
| Boc-Cys(Ph)-D-Pro-Achc-Leu-OMe ( <b>23</b> )            | 77.6        | 28.6              | 0.8         | -25.2             | 65.4        | 16.4              | 12.3        | -13.7             |
| Boc-Dmaa-D-Pro-Gly-Leu-OMe ( <b>33a</b> )               | 62.0        | 13.0              | 18.1        | -7.9              | 82.9        | 33.9              | 6.7         | -19.3             |
| Boc-Dmaa-D-Pro-Gly-Leu-OMe ( <b>33a</b> )               | 66.7        | 17.7              | 14.8        | -11.2             | 81.1        | 32.1              | 4.1         | -21.9             |
| <b>average</b>                                          | 65.3        |                   | 16.0        |                   | 69.1        |                   | 17.1        |                   |
| <b>st. dev.</b>                                         | 4.3         |                   | 5.1         |                   | 7.3         |                   | 9.3         |                   |
| <b>median</b>                                           | 63.8        | 16.3              | 15.8        | -10.0             | 71.0        | 20.1              | 14.9        | -8.9              |
| <b>minimum</b>                                          | 61.1        |                   | 0.8         |                   | 55.9        |                   | 4.1         |                   |
| <b>maximum</b>                                          | 77.6        |                   | 29.0        |                   | 82.9        |                   | 37.1        |                   |
| <b>count</b>                                            | 21          |                   | 21          |                   | 21          |                   | 21          |                   |

**Table S4.05:** Deviation from 3<sub>10</sub>-Helical Dihedrals ( $\phi, \psi = 49^\circ, 26^\circ$ ) in Type I' Flanking Residues<sup>19</sup>

| Deviation from 3 <sub>10</sub> -helix ( <i>i</i> and <i>i</i> +3) | $\phi(i)$ | $\Delta\phi(i)$ | $\psi(i)$ | $\Delta\psi(i)$ | $\phi(i+3)$ | $\Delta\phi(i+3)$ | $\psi(i+3)$ | $\Delta\psi(i+3)$ |
|-------------------------------------------------------------------|-----------|-----------------|-----------|-----------------|-------------|-------------------|-------------|-------------------|
| Boc-Dmaa-D-Pro-Acpc-Leu-NMe <sub>2</sub> ( <b>3c</b> )            | -56.8     | -105.8          | 132.6     | 106.6           | -110.3      | -159.3            | 118.9       | 92.9              |
| Boc-Dmaa-D-Pro-Acpc-Leu-OMe ( <b>4a</b> )                         | -57.8     | -106.8          | 133.4     | 107.4           | -119.3      | -168.3            | 171.1       | 145.1             |
| Boc-Dmaa-D-Pro-Acpc-Leu-OMe ( <b>4b</b> )                         | -59.4     | -108.4          | 135.2     | 109.2           | -90.7       | -139.7            | 150.4       | 124.4             |
| Boc-Dmaa-D-Pro-Acpc-Leu-OMe ( <b>4c</b> )                         | -54.1     | -103.1          | 131.8     | 105.8           | -65.1       | -114.1            | 152.2       | 126.2             |
| Boc-Dmaa-D-Pro-Acpc-Leu-OMe ( <b>4d</b> )                         | -58.9     | -107.9          | 137.7     | 111.7           | 152.3       | 103.3             | -96.2       | -122.2            |
| Boc-Dmaa-D-Pro-Acpc-Leu-OMe ( <b>4e</b> )                         | -54.8     | -103.8          | 132.5     | 106.5           | -135.7      | -184.7            | 178.3       | 152.3             |
| Boc-Cys(Ph)-D-Pro-Acpc-Leu-OMe ( <b>5</b> )                       | -58.3     | -107.3          | 128.5     | 102.5           | -82.9       | -131.9            | 172.1       | 146.1             |
| Boc-Dmaa-D-Pro-Acpc-Gly-OMe ( <b>7b</b> )                         | -60.9     | -109.9          | 132.8     | 106.8           | -104.1      | -153.1            | -156.7      | -182.7            |
| Boc-Dmaa-D-Pro-Acpc-Val-OMe ( <b>10</b> )                         | -56.2     | -105.2          | 136.3     | 110.3           | -74.3       | -123.3            | 144.4       | 118.4             |
| Boc-Dmaa-D-Pro-Acbc-Leu-NMe <sub>2</sub> ( <b>16c</b> )           | -55.0     | -104.0          | 133.0     | 107.0           | -120.0      | -169.0            | 97.6        | 71.6              |
| Boc-Dmaa-D-Pro-Acbc-Leu-OMe ( <b>17a</b> )                        | -51.7     | -100.7          | 133.3     | 107.3           | -62.9       | -111.9            | 144.5       | 118.5             |
| Boc-Dmaa-D-Pro-Acbc-Leu-OMe ( <b>17b</b> )                        | -55.4     | -104.4          | 129.7     | 103.7           | -63.1       | -112.1            | 147.1       | 121.1             |
| Boc-Dmaa-D-Pro-Cle-Leu-OMe ( <b>18a</b> )                         | -54.7     | -103.7          | 130.0     | 104.0           | -63.0       | -112.0            | 147.8       | 121.8             |
| Boc-Dmaa-D-Pro-Cle-Leu-OMe ( <b>18b</b> )                         | -52.0     | -101.0          | 133.2     | 107.2           | -61.8       | -110.8            | 144.0       | 118.0             |
| Boc-Dmaa-D-Pro-Aic-Leu-OMe ( <b>19a</b> )                         | -49.2     | -98.2           | 133.4     | 107.4           | -99.8       | -148.8            | 41.1        | 15.1              |
| Boc-Dmaa-D-Pro-Aic-Leu-OMe ( <b>19b</b> )                         | 50.3      | 1.3             | 46.3      | 20.3            | -118        | -166.8            | -175.9      | -201.9            |
| Boc-Dmaa-D-Pro-Achc-Leu-OMe ( <b>22a</b> )                        | -54.1     | -103.1          | 128.4     | 102.4           | -62.6       | -111.6            | 155.2       | 129.2             |
| Boc-Dmaa-D-Pro-Achc-Leu-OMe ( <b>22b</b> )                        | -55.6     | -104.6          | 132.0     | 106.0           | -70.6       | -119.6            | 150.0       | 124.0             |
| Boc-Cys(Ph)-D-Pro-Achc-Leu-OMe ( <b>23</b> )                      | -59.3     | -108.3          | 134.9     | 108.9           | -65.7       | -114.7            | 154.3       | 128.3             |
| Boc-Dmaa-D-Pro-Gly-Leu-OMe ( <b>33a</b> )                         | -52.3     | -101.3          | 126.8     | 100.8           | -121        | -169.8            | -32.4       | -58.4             |
| Boc-Dmaa-D-Pro-Gly-Leu-OMe ( <b>33a</b> )                         | -53.5     | -102.5          | 125.5     | 99.5            | -100        | -149.2            | -28.7       | -54.7             |
| <b>average</b>                                                    | -50.5     |                 | 128.0     |                 | -78.0       |                   | 84.7        |                   |
| <b>st. dev.</b>                                                   | 23.3      |                 | 19.0      |                 | 58.2        |                   | 112.7       |                   |
| <b>median</b>                                                     | -55.0     | -99.5           | 132.6     | 102.0           | -82.9       | -127.0            | 144.5       | 58.7              |
| <b>minimum</b>                                                    | -60.9     |                 | 46.3      |                 | -135.7      |                   | -175.9      |                   |
| <b>maximum</b>                                                    | 50.3      |                 | 137.7     |                 | 152.3       |                   | 178.3       |                   |
| <b>count</b>                                                      | 21        |                 | 21        |                 | 21          |                   | 21          |                   |

**Table S4.06:**  $\phi, \psi$  Dihedrals of  $i$  &  $i+3$  Residues in Type I/I'  $\beta$ -Turns

| Type I/I' $\beta$ -Turns                                              | $\phi(i)$ | $\psi(i)$ | $\phi(i+3)$ | $\psi(i+3)$ |
|-----------------------------------------------------------------------|-----------|-----------|-------------|-------------|
| Boc-Dmaa-D-Pro-Acpc-Leu-NMe <sub>2</sub> ( <b>3c</b> )                | -56.8     | 132.6     | -110.3      | 118.9       |
| Boc-Dmaa-D-Pro-Acpc-Leu-OMe ( <b>4a</b> )                             | -57.8     | 133.4     | -119.3      | 171.1       |
| Boc-Dmaa-D-Pro-Acpc-Leu-OMe ( <b>4b</b> )                             | -59.4     | 135.2     | -90.7       | 150.4       |
| Boc-Dmaa-D-Pro-Acpc-Leu-OMe ( <b>4c</b> )                             | -54.1     | 131.8     | -65.1       | 152.2       |
| Boc-Dmaa-D-Pro-Acpc-Leu-OMe ( <b>4d</b> )                             | -58.9     | 137.7     | -96.2       | 152.3       |
| Boc-Dmaa-D-Pro-Acpc-Leu-OMe ( <b>4e</b> )                             | -54.8     | 132.5     | -135.7      | 178.3       |
| Boc-Cys(Ph)-D-Pro-Acpc-Leu-OMe ( <b>5</b> )                           | -58.3     | 128.5     | -82.9       | 172.1       |
| Boc-Dmaa-D-Pro-Acpc-Gly-OMe ( <b>7b</b> )                             | -60.9     | 132.8     | -104.1      | -156.7      |
| Boc-Dmaa-D-Pro-Acpc-Val-OMe ( <b>10</b> )                             | -56.2     | 136.3     | -74.3       | 144.4       |
| Boc-Dmaa-D-Pro-Acpc-Leu-NMe <sub>2</sub> ( <b>16c</b> )               | -55.0     | 133.0     | -120.0      | 97.6        |
| Boc-Dmaa-D-Pro-Acpc-Leu-OMe ( <b>17a</b> )                            | -51.7     | 133.3     | -62.9       | 144.5       |
| Boc-Dmaa-D-Pro-Acpc-Leu-OMe ( <b>17b</b> )                            | -55.4     | 129.7     | -63.1       | 147.1       |
| Boc-Dmaa-D-Pro-Cle-Leu-OMe ( <b>18a</b> )                             | -54.7     | 130.0     | -63.0       | 147.8       |
| Boc-Dmaa-D-Pro-Cle-Leu-OMe ( <b>18b</b> )                             | -52.0     | 133.2     | -61.8       | 144.0       |
| Boc-Dmaa-D-Pro-Aic-Leu-OMe ( <b>19a</b> )                             | -49.2     | 133.4     | -99.8       | 41.1        |
| Boc-Dmaa-D-Pro-Achc-Leu-OMe ( <b>22a</b> )                            | -54.1     | 128.4     | -62.6       | 155.2       |
| Boc-Dmaa-D-Pro-Achc-Leu-OMe ( <b>22b</b> )                            | -55.6     | 132.0     | -70.6       | 150.0       |
| Boc-Cys(Ph)-D-Pro-Achc-Leu-OMe ( <b>23</b> )                          | -59.3     | 134.9     | -65.7       | 154.3       |
| Boc-Dmaa-D-Pro-Gly-Leu-OMe ( <b>33a</b> )                             | -52.3     | 126.8     | -120.8      | -32.4       |
| Boc-Dmaa-D-Pro-Gly-Leu-OMe ( <b>33b</b> )                             | -53.5     | 125.5     | -100.2      | -28.7       |
| Boc-His( $\tau$ -Bn)-Pro-Aib( <i>R</i> )- $\alpha$ -Mba ( <b>37</b> ) | -72.0     | 124.3     | N/A         | N/A         |
| <b>average</b>                                                        | -56.3     | 131.7     | -88.5       | 110.2       |
| <b>st. dev.</b>                                                       | 4.6       | 3.5       | 24.3        | 87.4        |
| <b>median</b>                                                         | -55.4     | 132.6     | -86.8       | 147.5       |
| <b>minimum</b>                                                        | -72.0     | 124.3     | -135.7      | -156.7      |
| <b>maximum</b>                                                        | -49.2     | 137.7     | -61.8       | 178.3       |
| <b>count</b>                                                          | 21        | 21        | 20          | 20          |

**NOTE:** The data presented in this table was used to calculate the average  $\phi, \psi$  values for cluster (*i*) in Figure S4.04.

**Table S4.07:**  $\phi, \psi$  Dihedrals of  $i$  &  $i+3$  Residues in Extended Type II/II'  $\beta$ -Turns

| Type II/II' $\beta$ -Turns (extended)                    | $\phi(i)$ | $\psi(i)$ | $\phi(i+3)$ | $\psi(i+3)$ |
|----------------------------------------------------------|-----------|-----------|-------------|-------------|
| Boc-Dmaa-D-Pro-Acpc-Leu-NMe <sub>2</sub> ( <b>3b</b> )   | -158.2    | 134.0     | -96.2       | 126.6       |
| Boc-Leu-D-Pro-Acpc-Leu-OMe ( <b>6</b> )                  | -141.0    | 148.1     | -108.3      | 57.5        |
| Boc-Dmaa-D-Pro-Acpc-Gly-OMe ( <b>7a</b> )                | -92.4     | 154.6     | 71.5        | -157.3      |
| Boc-Dmaa-D-Pro-Acpc-Phe-OMe ( <b>13</b> )                | -136.9    | 147.3     | -129.0      | 81.9        |
| Boc-Dmaa-D-Pro-Acpc-D-Phe-NMe <sub>2</sub> ( <b>14</b> ) | -130.4    | 132.9     | 156.3       | -77.8       |
| Boc-Dmaa-Pro-Acpc-Leu-OMe ( <b>15</b> )                  | -89.6     | 158.0     | -142.5      | 81.6        |
| Boc-Dmaa-D-Pro-Aic-D-Phe-NMe <sub>2</sub> ( <b>20a</b> ) | -171.1    | 127.1     | 54.2        | -131.6      |
| Boc-Dmaa-D-Pro-Aic-D-Phe-NMe <sub>2</sub> ( <b>20b</b> ) | -146.8    | 156.9     | 67.8        | -134.9      |
| Boc-Dmaa-Pro-Aic-Leu-OMe ( <b>21a</b> )                  | -129.4    | 161.3     | -55.3       | 136.3       |
| Boc-Dmaa-Pro-Aic-Leu-OMe ( <b>21b</b> )                  | -139.2    | 165.1     | -53.4       | 137.7       |
| Boc-Dmaa-D-Pro-Aib-3-Pal-NMe <sub>2</sub> ( <b>28</b> )  | -162.9    | 122.8     | -81.9       | 112.4       |
| Boc-Dmaa-Pro-Aib-Leu-OMe ( <b>30</b> )                   | -138.7    | 159.8     | -55.1       | 136.6       |
| Boc-Dmaa-D-Pro-Ala-Phe-OMe ( <b>31</b> )                 | -136.5    | 147.7     | -130.3      | 81.9        |
| Boc-Dmaa-D-Pro-Phe-Leu-NMe <sub>2</sub> ( <b>32a</b> )   | -114.6    | 130.7     | -101.5      | 120.6       |
| Boc-Dmaa-D-Pro-Phe-Leu-NMe <sub>2</sub> ( <b>32b</b> )   | -118.6    | 142.7     | -116.7      | 138.6       |
| <b>average</b>                                           | -133.8    | 145.9     | -48.0       | 47.3        |
| <b>st. dev.</b>                                          | 23.0      | 13.6      | 91.4        | 111.7       |
| <b>median</b>                                            | -136.9    | 147.7     | -81.9       | 81.9        |
| <b>minimum</b>                                           | -171.1    | 122.8     | -142.5      | -157.3      |
| <b>maximum</b>                                           | -89.6     | 165.1     | 156.3       | 138.6       |
| <b>count</b>                                             | 15        | 15        | 15          | 15          |

**NOTE:** The data presented in this table was used to calculate the average  $\phi, \psi$  values for cluster (ii) in Figure S4.04.

**Table S4.08:**  $\phi, \psi$  Dihedrals of  $i$  &  $i+3$  Residues in Bent Type II'  $\beta$ -Turns

| Type II' $\beta$ -Turns (bent)                           | $\phi(i)$ | $\psi(i)$ | $\phi(i+3)$ | $\psi(i+3)$ |
|----------------------------------------------------------|-----------|-----------|-------------|-------------|
| Boc-Dmaa-D-Pro-Acpc-Leu-NMe <sub>2</sub> ( <b>3a</b> )   | -127.9    | 66.8      | -109.3      | 145.6       |
| Boc-Dmaa-D-Pro-Acpc-Nle-NMe <sub>2</sub> ( <b>8</b> )    | -151.5    | 83.3      | -96.9       | 117.6       |
| Boc-Dmaa-D-Pro-Acpc-Val-NMe <sub>2</sub> ( <b>9</b> )    | -156.4    | 79.9      | -101.3      | 112.9       |
| Boc-Dmaa-D-Pro-Acpc-Chg-NMe <sub>2</sub> ( <b>11</b> )   | -153.4    | 82.1      | -131.2      | 139.6       |
| Boc-Dmaa-D-Pro-Acpc-Phe-NMe <sub>2</sub> ( <b>12</b> )   | -152.5    | 77.2      | -90.8       | 135.5       |
| Boc-Dmaa-D-Pro-Acpc-Leu-NMe <sub>2</sub> ( <b>16a</b> )  | -156.5    | 89.0      | -80.6       | 130.8       |
| Boc-Dmaa-D-Pro-Acpc-Leu-NMe <sub>2</sub> ( <b>16b</b> )  | -126.3    | 52.2      | -121.3      | 141.7       |
| Boc-Dmaa-D-Pro-Aib-Leu-NMe <sub>2</sub> ( <b>24</b> )    | -135.4    | 95.5      | -121.9      | 75.3        |
| Boc-Dmaa-D-Pro-Aib-Leu-OMe ( <b>25</b> )                 | -133.6    | 97.6      | -104.1      | 62.9        |
| Boc-Dmaa-D-Pro-Aib-Val-OMe ( <b>26</b> )                 | -159.2    | 90.1      | -118.5      | -168.4      |
| Boc-Dmaa-D-Pro-Aib-Phe-OMe ( <b>27</b> )                 | -152.9    | 79.1      | -87.8       | 148.0       |
| Boc-Dmaa-D-Pro-Aib-2-Thi-NMe <sub>2</sub> ( <b>29a</b> ) | -149.6    | 84.3      | -85.3       | 145.8       |
| Boc-Dmaa-D-Pro-Aib-2-Thi-NMe <sub>2</sub> ( <b>29b</b> ) | -150.5    | 77.1      | -89.4       | 144.4       |
| Boc-Keto-D-Pro-Aib-Phe-OMe ( <b>34</b> )                 | -138.5    | 63.4      | -108.9      | 140.7       |
| <b>average</b>                                           | -146.0    | 79.8      | -103.4      | 105.2       |
| <b>st. dev.</b>                                          | 11.2      | 12.4      | 15.7        | 83.1        |
| <b>median</b>                                            | -151.0    | 81.0      | -102.7      | 137.6       |
| <b>minimum</b>                                           | -159.2    | 52.2      | -131.2      | -168.4      |
| <b>maximum</b>                                           | -126.3    | 97.6      | -80.6       | 148         |
| <b>count</b>                                             | 14        | 14        | 14          | 14          |

**NOTE:** The data presented in this table was used to calculate the average  $\phi, \psi$  values for cluster (iii) in Figure S4.04.

**Table S4.09:**  $\phi, \psi$  Dihedrals of  $i+3$  Residues

| Peptide Sequence                                         | $\phi(i+3)$ | $\psi(i+3)$ |
|----------------------------------------------------------|-------------|-------------|
| Boc-Dmaa-D-Pro-Acpc-Leu-NMe <sub>2</sub> ( <b>3a</b> )   | -109.3      | 145.6       |
| Boc-Dmaa-D-Pro-Acpc-Leu-NMe <sub>2</sub> ( <b>3b</b> )   | -96.2       | 126.6       |
| Boc-Dmaa-D-Pro-Acpc-Leu-NMe <sub>2</sub> ( <b>3c</b> )   | -110.3      | 118.9       |
| Boc-Dmaa-D-Pro-Acpc-Leu-OMe ( <b>4a</b> )                | -119.3      | 171.1       |
| Boc-Dmaa-D-Pro-Acpc-Leu-OMe ( <b>4b</b> )                | -90.7       | 150.4       |
| Boc-Dmaa-D-Pro-Acpc-Leu-OMe ( <b>4c</b> )                | -65.1       | 152.2       |
| Boc-Dmaa-D-Pro-Acpc-Leu-OMe ( <b>4d</b> )                | -96.2       | 152.3       |
| Boc-Dmaa-D-Pro-Acpc-Leu-OMe ( <b>4e</b> )                | -135.7      | 178.3       |
| Boc-Cys(Ph)-D-Pro-Acpc-Leu-OMe ( <b>5</b> )              | -82.9       | 172.1       |
| Boc-Leu-D-Pro-Acpc-Leu-OMe ( <b>6</b> )                  | -108.3      | 57.5        |
| Boc-Dmaa-D-Pro-Acpc-Nle-NMe <sub>2</sub> ( <b>8</b> )    | -96.9       | 117.6       |
| Boc-Dmaa-D-Pro-Acpc-Val-NMe <sub>2</sub> ( <b>9</b> )    | -101.3      | 112.9       |
| Boc-Dmaa-D-Pro-Acpc-Val-OMe ( <b>10</b> )                | -74.3       | 144.4       |
| Boc-Dmaa-D-Pro-Acpc-Chg-NMe <sub>2</sub> ( <b>11</b> )   | -131.2      | 139.6       |
| Boc-Dmaa-D-Pro-Acpc-Phe-NMe <sub>2</sub> ( <b>12</b> )   | -90.8       | 135.5       |
| Boc-Dmaa-D-Pro-Acpc-Phe-OMe ( <b>13</b> )                | -129.0      | 81.9        |
| Boc-Dmaa-Pro-Acpc-Leu-OMe ( <b>15</b> )                  | -142.5      | 81.6        |
| Boc-Dmaa-D-Pro-Acbc-Leu-NMe <sub>2</sub> ( <b>16a</b> )  | -80.6       | 130.8       |
| Boc-Dmaa-D-Pro-Acbc-Leu-NMe <sub>2</sub> ( <b>16b</b> )  | -121.3      | 141.7       |
| Boc-Dmaa-D-Pro-Acbc-Leu-NMe <sub>2</sub> ( <b>16c</b> )  | -120.0      | 97.6        |
| Boc-Dmaa-D-Pro-Acbc-Leu-OMe ( <b>17a</b> )               | -62.9       | 144.5       |
| Boc-Dmaa-D-Pro-Acbc-Leu-OMe ( <b>17b</b> )               | -63.1       | 147.1       |
| Boc-Dmaa-D-Pro-Cle-Leu-OMe ( <b>18a</b> )                | -63.0       | 147.8       |
| Boc-Dmaa-D-Pro-Cle-Leu-OMe ( <b>18b</b> )                | -61.8       | 144.0       |
| Boc-Dmaa-D-Pro-Aic-Leu-OMe ( <b>19a</b> )                | -99.8       | 41.1        |
| Boc-Dmaa-Pro-Aic-Leu-OMe ( <b>21a</b> )                  | -55.3       | 136.3       |
| Boc-Dmaa-Pro-Aic-Leu-OMe ( <b>21b</b> )                  | -53.4       | 137.7       |
| Boc-Dmaa-D-Pro-Achc-Leu-OMe ( <b>22a</b> )               | -62.6       | 155.2       |
| Boc-Dmaa-D-Pro-Achc-Leu-OMe ( <b>22b</b> )               | -70.6       | 150.0       |
| Boc-Cys(Ph)-D-Pro-Achc-Leu-OMe ( <b>23</b> )             | -65.7       | 154.3       |
| Boc-Dmaa-D-Pro-Aib-Leu-NMe <sub>2</sub> ( <b>24</b> )    | -121.9      | 75.3        |
| Boc-Dmaa-D-Pro-Aib-Leu-OMe ( <b>25</b> )                 | -104.1      | 62.9        |
| Boc-Dmaa-D-Pro-Aib-Phe-OMe ( <b>27</b> )                 | -87.8       | 148.0       |
| Boc-Dmaa-D-Pro-Aib-3-Pal-NMe <sub>2</sub> ( <b>28</b> )  | -81.9       | 112.4       |
| Boc-Dmaa-D-Pro-Aib-2-Thi-NMe <sub>2</sub> ( <b>29a</b> ) | -85.3       | 145.8       |
| Boc-Dmaa-D-Pro-Aib-2-Thi-NMe <sub>2</sub> ( <b>29b</b> ) | -89.4       | 144.4       |
| Boc-Dmaa-Pro-Aib-Leu-OMe ( <b>30</b> )                   | -55.1       | 136.6       |
| Boc-Dmaa-D-Pro-Ala-Phe-OMe ( <b>31</b> )                 | -130.3      | 81.9        |
| Boc-Dmaa-D-Pro-Phe-Leu-NMe <sub>2</sub> ( <b>32a</b> )   | -101.5      | 120.6       |
| Boc-Dmaa-D-Pro-Phe-Leu-NMe <sub>2</sub> ( <b>32b</b> )   | -116.7      | 138.6       |
| Boc-Keto-D-Pro-Aib-Phe-OMe ( <b>34</b> )                 | -108.9      | 140.7       |
| <b>average</b>                                           | -93.7       | 128.6       |
| <b>st. dev.</b>                                          | 25.2        | 32.1        |
| <b>median</b>                                            | -96.2       | 139.6       |
| <b>minimum</b>                                           | -142.5      | 41.1        |
| <b>maximum</b>                                           | -53.4       | 178.3       |
| <b>count</b>                                             | 41          | 41          |

**NOTE:** The data presented in this table was used to calculate the average  $\phi, \psi$  values for cluster (*i*) in Figure S4.05.



**Table S4.10:  $\omega$  Dihedrals for All Peptides**

| Peptide Sequence                                                       | $\omega(i)$ | $\omega(i+1)$ | $\omega(i+2)$ | $\omega(i+3)$ |                                |                                         |
|------------------------------------------------------------------------|-------------|---------------|---------------|---------------|--------------------------------|-----------------------------------------|
| Boc-Dmaa-D-Pro-Acpc-Leu-NMe <sub>2</sub> ( <b>3a</b> )                 | 179.7       | 175.3         | 174.2         | 177.6         |                                |                                         |
| Boc-Dmaa-D-Pro-Acpc-Leu-NMe <sub>2</sub> ( <b>3b</b> )                 | 178.4       | 175.9         | 170.6         | 170.2         |                                |                                         |
| Boc-Dmaa-D-Pro-Acpc-Leu-NMe <sub>2</sub> ( <b>3c</b> )                 | 179.9       | 173.0         | 173.4         | 173.4         |                                |                                         |
| Boc-Dmaa-D-Pro-Acpc-Leu-OMe ( <b>4a</b> )                              | 179.5       | 177.3         | 172.5         | 178.0         |                                |                                         |
| Boc-Dmaa-D-Pro-Acpc-Leu-OMe ( <b>4b</b> )                              | 178.5       | 177.5         | 170.3         | 176.8         |                                |                                         |
| Boc-Dmaa-D-Pro-Acpc-Leu-OMe ( <b>4c</b> )                              | 177.7       | 173.5         | 178.9         | 173.2         |                                |                                         |
| Boc-Dmaa-D-Pro-Acpc-Leu-OMe ( <b>4c</b> )                              | 177.3       | 177.2         | 169.1         | 178.2         |                                |                                         |
| Boc-Dmaa-D-Pro-Acpc-Leu-OMe ( <b>4e</b> )                              | 178.9       | 175.8         | 179.5         | 178.7         |                                |                                         |
| Boc-Cys(Ph)-D-Pro-Acpc-Leu-OMe ( <b>5</b> )                            | 176.9       | 174.1         | 176.6         | 179.9         |                                |                                         |
| Boc-Leu-D-Pro-Acpc-Leu-OMe ( <b>6</b> )                                | 179.9       | 176.5         | 179.2         | 178.2         |                                |                                         |
| Boc-Dmaa-D-Pro-Acpc-Gly-OMe ( <b>7a</b> )                              | 172.5       | 170.6         | 176.6         | 165.0         |                                |                                         |
| Boc-Dmaa-D-Pro-Acpc-Gly-OMe ( <b>7b</b> )                              | 172.1       | 173.7         | 169.7         | 178.0         |                                |                                         |
| Boc-Dmaa-D-Pro-Acpc-Nle-NMe <sub>2</sub> ( <b>8</b> )                  | 173.6       | 176.7         | 177.5         | 175.5         |                                |                                         |
| Boc-Dmaa-D-Pro-Acpc-Val-NMe <sub>2</sub> ( <b>9</b> )                  | 170.9       | 179.2         | 178.8         | 177.4         |                                |                                         |
| Boc-Dmaa-D-Pro-Acpc-Val-OMe ( <b>10</b> )                              | 179.3       | 171.3         | 173.5         | 173.6         |                                |                                         |
| Boc-Dmaa-D-Pro-Acpc-Chg-NMe <sub>2</sub> ( <b>11</b> )                 | 173.0       | 177.1         | 176.2         | 170.7         |                                |                                         |
| Boc-Dmaa-D-Pro-Acpc-Phe-NMe <sub>2</sub> ( <b>12</b> )                 | 178.7       | 174.7         | 172.9         | 175.5         |                                |                                         |
| Boc-Dmaa-D-Pro-Acpc-Phe-OMe ( <b>13</b> )                              | 175.8       | 175.5         | 160.1         | 177.1         |                                |                                         |
| Boc-Dmaa-D-Pro-Acpc-D-Phe-NMe <sub>2</sub> ( <b>14</b> )               | 174.8       | 179.9         | 173.7         | 175.5         |                                |                                         |
| Boc-Dmaa-Pro-Acpc-Leu-OMe ( <b>15</b> )                                | 173.9       | 179.1         | 172.2         | 179.7         |                                |                                         |
| Boc-Dmaa-D-Pro-Acpc-Leu-NMe <sub>2</sub> ( <b>16a</b> )                | 178.6       | 176.9         | 171.4         | 176.4         |                                |                                         |
| Boc-Dmaa-D-Pro-Acpc-Leu-NMe <sub>2</sub> ( <b>16b</b> )                | 176.7       | 179.8         | 172.5         | 175.2         |                                |                                         |
| Boc-Dmaa-D-Pro-Acpc-Leu-NMe <sub>2</sub> ( <b>16c</b> )                | 178.6       | 176.1         | 176.7         | 176.4         |                                |                                         |
| Boc-Dmaa-D-Pro-Acpc-Leu-OMe ( <b>17a</b> )                             | 173.9       | 178.1         | 179.2         | 175.9         |                                |                                         |
| Boc-Dmaa-D-Pro-Acpc-Leu-OMe ( <b>17b</b> )                             | 171.8       | 177.7         | 177.3         | 177.0         |                                |                                         |
| Boc-Dmaa-D-Pro-Cle-Leu-OMe ( <b>18a</b> )                              | 167.7       | 175.6         | 174.9         | 178.6         |                                |                                         |
| Boc-Dmaa-D-Pro-Cle-Leu-OMe ( <b>18b</b> )                              | 170.5       | 177.4         | 176.3         | 177.1         |                                |                                         |
| Boc-Dmaa-D-Pro-Aic-Leu-OMe ( <b>19a</b> )                              | 168.1       | 177.2         | 179.4         | 174.4         |                                |                                         |
| Boc-Dmaa-D-Pro-Aic-Leu-OMe ( <b>19b</b> )                              | 175.4       | 175.9         | 177.6         | 179.7         |                                |                                         |
| Boc-Dmaa-D-Pro-Aic-D-Phe-NMe <sub>2</sub> ( <b>20a</b> )               | 175.2       | 178.6         | 171.0         | 169.1         |                                |                                         |
| Boc-Dmaa-D-Pro-Aic-D-Phe-NMe <sub>2</sub> ( <b>20b</b> )               | 168.6       | 177.2         | 173.2         | 178.1         |                                |                                         |
| Boc-Dmaa-Pro-Aic-Leu-OMe ( <b>21a</b> )                                | 164.8       | 176.6         | 171.9         | 178.1         |                                |                                         |
| Boc-Dmaa-Pro-Aic-Leu-OMe ( <b>21b</b> )                                | 170.7       | 176.0         | 174.0         | 177.4         |                                |                                         |
| Boc-Dmaa-D-Pro-Achc-Leu-OMe ( <b>22a</b> )                             | 168.9       | 172.6         | 164.7         | 176.8         |                                |                                         |
| Boc-Dmaa-D-Pro-Achc-Leu-OMe ( <b>22b</b> )                             | 166.4       | 173.9         | 173.3         | 178.0         |                                |                                         |
| Boc-Cys(Ph)-D-Pro-Achc-Leu-OMe ( <b>23</b> )                           | 170.1       | 163.6         | 179.3         | 170.3         |                                |                                         |
| Boc-Dmaa-D-Pro-Aib-Leu-NMe <sub>2</sub> ( <b>24</b> )                  | 177.6       | 180.0         | 174.6         | 179.7         |                                |                                         |
| Boc-Dmaa-D-Pro-Aib-Leu-OMe ( <b>25</b> )                               | 177.6       | 175.4         | 177.8         | 171.3         |                                |                                         |
| Boc-Dmaa-D-Pro-Aib-Val-OMe ( <b>26</b> )                               | 179.8       | 177.1         | 176.3         | 178.9         |                                |                                         |
| Boc-Dmaa-D-Pro-Aib-Phe-OMe ( <b>27</b> )                               | 178.1       | 178.8         | 179.7         | 177.7         |                                |                                         |
| Boc-Dmaa-D-Pro-Aib-3-Pal-NMe <sub>2</sub> ( <b>28</b> )                | 175.7       | 177.6         | 178.9         | 170.7         |                                |                                         |
| Boc-Dmaa-D-Pro-Aib-2-Thi-NMe <sub>2</sub> ( <b>29a</b> )               | 176.4       | 179.8         | 177.1         | 177.5         |                                |                                         |
| Boc-Dmaa-D-Pro-Aib-2-Thi-NMe <sub>2</sub> ( <b>29b</b> )               | 176.6       | 179.5         | 176.6         | 173.6         |                                |                                         |
| Boc-Dmaa-Pro-Aib-Leu-OMe ( <b>30</b> )                                 | 163.3       | 176.1         | 174.1         | 179.9         |                                |                                         |
| Boc-Dmaa-D-Pro-Ala-Phe-OMe ( <b>31</b> )                               | 177.3       | 176.4         | 167.3         | 177.1         |                                |                                         |
| Boc-Dmaa-D-Pro-Phe-Leu-NMe <sub>2</sub> ( <b>32a</b> )                 | -7.8        | 176.0         | 179.9         | 169.7         |                                |                                         |
| Boc-Dmaa-D-Pro-Phe-Leu-NMe <sub>2</sub> ( <b>32b</b> )                 | -14.8       | 170.2         | 178.7         | 172.8         |                                |                                         |
| Boc-Dmaa-D-Pro-Gly-Leu-OMe ( <b>33a</b> )                              | 177.1       | 177.3         | 175.3         | 172.0         |                                |                                         |
| Boc-Dmaa-D-Pro-Gly-Leu-OMe ( <b>33b</b> )                              | 174.5       | 173.4         | 174.5         | 173.4         |                                |                                         |
| Boc-Keto-D-Pro-Aib-Phe-OMe ( <b>34</b> )                               | 177.2       | 179.6         | 177.6         | 179.8         |                                |                                         |
| Boc-Phe-Pro-Aib-( <i>R</i> )- $\alpha$ -Mba ( <b>35</b> )              | 173.5       | 172.2         | 174.2         | N/A           |                                |                                         |
| 2-Msa-Pro-D-Val-( <i>R</i> )- $\alpha$ -Mba ( <b>36</b> )              | 176.8       | 179.6         | 174.6         | N/A           |                                |                                         |
| Boc-His( $\tau$ -Bn)-Pro-Aib-( <i>R</i> )- $\alpha$ -Mba ( <b>37</b> ) | 175.4       | 172.1         | 174.6         | N/A           |                                |                                         |
|                                                                        |             |               |               |               | <b>All <math>\omega</math></b> | <b>All <math>\omega</math> (w/o 32)</b> |
| <b>average</b>                                                         | 167.8       | 176.0         | 174.7         | 175.7         | 173.5                          | 175.3                                   |
| <b>st. dev.</b>                                                        | 36.0        | 3.0           | 4.0           | 3.4           | 18.6                           | 3.7                                     |
| <b>median</b>                                                          | 175.7       | 176.5         | 174.6         | 176.9         | 176.3                          | 176.4                                   |
| <b>minimum</b>                                                         | -14.8       | 163.6         | 160.1         | 165.0         | -14.8                          | 160.1                                   |
| <b>maximum</b>                                                         | 179.9       | 180.0         | 179.9         | 179.9         | 180.0                          | 180.0                                   |
| <b>count</b>                                                           | 53          | 53            | 53            | 50            | 209                            | 201                                     |

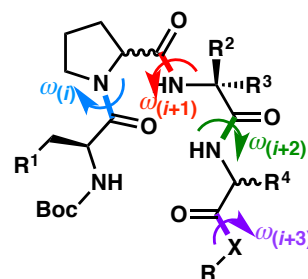

**Table S4.11: Backbone Dihedrals in Unfolded Peptides 32a,b (vs. Avg. Type II' Potentials)**

| Unfolded Peptide                              | $\phi(i)$ | $\psi(i)$ | $\omega(i)$ | $\phi(i+1)$ | $\psi(i+1)$ | $\omega(i+1)$ | $\phi(i+2)$ | $\psi(i+2)$ | $\omega(i+2)$ | $\phi(i+3)$ | $\psi(i+3)$ | $\omega(i+3)$ |
|-----------------------------------------------|-----------|-----------|-------------|-------------|-------------|---------------|-------------|-------------|---------------|-------------|-------------|---------------|
| Boc-Dmaa-D-Pro-Phe-Leu-NMe <sub>2</sub> (32a) | -114.6    | 130.7     | -7.8        | 75.1        | -171.0      | -176.0        | -137.5      | 139.6       | -179.9        | -101.5      | 120.6       | 169.7         |
| Boc-Dmaa-D-Pro-Phe-Leu-NMe <sub>2</sub> (32b) | -118.6    | 142.7     | -14.8       | 86.6        | -168.7      | -170.2        | -132.7      | 154.4       | 178.7         | -116.7      | 138.6       | 172.8         |
| average type II'                              | -144.4    | 103.9     | 175.0       | 60.6        | -129.9      | 177.2         | -69.9       | -11.7       | 174.3         | -71.4       | 62.2        | 175.7         |

**NOTE:** The  $\phi, \psi$  presented in this table is labeled “unfolded peptide” in Figures S.02 and S.03.

**Table S4.12: Degree of Backbone Bending in Type II/II'  $\beta$ -Turns & Hairpins**

| Peptide Sequence                                | Bend |
|-------------------------------------------------|------|
| Boc-Dmaa-D-Pro-Acpc-Leu-NMe <sub>2</sub> (3a)   | 65.9 |
| Boc-Dmaa-D-Pro-Acpc-Leu-NMe <sub>2</sub> (3b)   | 41.0 |
| Boc-Leu-D-Pro-Acpc-Leu-OMe (6)                  | 46.9 |
| Boc-Dmaa-D-Pro-Acpc-Gly-OMe (7a)                | 26.9 |
| Boc-Dmaa-D-Pro-Acpc-Nle-NMe <sub>2</sub> (8)    | 58.4 |
| Boc-Dmaa-D-Pro-Acpc-Val-NMe <sub>2</sub> (9)    | 57.8 |
| Boc-Dmaa-D-Pro-Acpc-Chg-NMe <sub>2</sub> (11)   | 50.6 |
| Boc-Dmaa-D-Pro-Acpc-Phe-NMe <sub>2</sub> (12)   | 58.9 |
| Boc-Dmaa-D-Pro-Acpc-Phe-OMe (13)                | 45.9 |
| Boc-Dmaa-D-Pro-Acpc-D-Phe-NMe <sub>2</sub> (14) | 43.4 |
| Boc-Dmaa-Pro-Acpc-Leu-OMe (15)                  | 64.8 |
| Boc-Dmaa-D-Pro-Acpc-Leu-NMe <sub>2</sub> (16a)  | 57.4 |
| Boc-Dmaa-D-Pro-Acpc-Leu-NMe <sub>2</sub> (16b)  | 64.9 |
| Boc-Dmaa-D-Pro-Aic-D-Phe-NMe <sub>2</sub> (20a) | 28.2 |
| Boc-Dmaa-D-Pro-Aic-D-Phe-NMe <sub>2</sub> (20b) | 13.7 |
| Boc-Dmaa-Pro-Aic-Leu-OMe (21a)                  | 34.4 |
| Boc-Dmaa-Pro-Aic-Leu-OMe (21b)                  | 34.4 |
| Boc-Dmaa-D-Pro-Aib-Leu-NMe <sub>2</sub> (24)    | 60.3 |
| Boc-Dmaa-D-Pro-Aib-Leu-OMe (25)                 | 82.0 |
| Boc-Dmaa-D-Pro-Aib-Val-OMe (26)                 | 45.9 |
| Boc-Dmaa-D-Pro-Aib-Phe-OMe (27)                 | 56.3 |
| Boc-Dmaa-D-Pro-Aib-3-Pal-NMe <sub>2</sub> (28)  | 50.0 |
| Boc-Dmaa-D-Pro-Aib-2-Thi-NMe <sub>2</sub> (29a) | 55.6 |
| Boc-Dmaa-D-Pro-Aib-2-Thi-NMe <sub>2</sub> (29b) | 54.8 |
| Boc-Dmaa-Pro-Aib-Leu-OMe (30)                   | 34.0 |
| Boc-Dmaa-D-Pro-Ala-Phe-OMe (31)                 | 48.0 |
| Boc-Keto-D-Pro-Aib-Phe-OMe (34)                 | 62.3 |
| average                                         | 49.7 |
| st. dev.                                        | 14.6 |
| median                                          | 50.6 |
| minimum                                         | 13.7 |
| maximum                                         | 82.0 |
| count                                           | 27   |

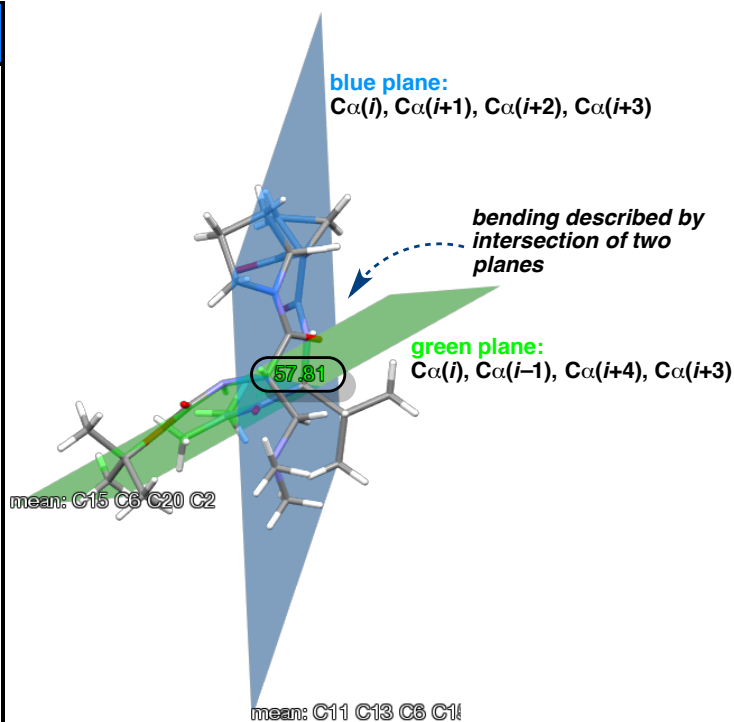

**NOTE:** Backbone bending is only defined for type II/II'  $\beta$ -turn and  $\beta$ -hairpin structures.

**Table S4.13:** Backbone Bending as a Function of  $\phi, \psi(i, i+3)$  Dihedrals in Type II/II'  $\beta$ -Turns

| Peptide Sequence                                         | $\phi(i)$ | $\psi(i)$ | $\phi(i+3)$ | $\psi(i+3)$ | Bend ( $^\circ$ ) |
|----------------------------------------------------------|-----------|-----------|-------------|-------------|-------------------|
| Boc-Dmaa-D-Pro-Acpc-Leu-NMe <sub>2</sub> ( <b>3a</b> )   | -127.9    | 66.8      | -109.3      | 145.6       | 65.9              |
| Boc-Dmaa-D-Pro-Acpc-Leu-NMe <sub>2</sub> ( <b>3b</b> )   | -158.2    | 134.0     | -96.2       | 126.6       | 41.0              |
| Boc-Leu-D-Pro-Acpc-Leu-OMe ( <b>6</b> )                  | -141.0    | 148.1     | -108.3      | 57.5        | 46.9              |
| Boc-Dmaa-D-Pro-Acpc-Gly-OMe ( <b>7a</b> )                | -92.4     | 154.6     | 71.5        | -157.3      | 26.9              |
| Boc-Dmaa-D-Pro-Acpc-Nle-NMe <sub>2</sub> ( <b>8</b> )    | -151.5    | 83.3      | -96.9       | 117.6       | 58.4              |
| Boc-Dmaa-D-Pro-Acpc-Val-NMe <sub>2</sub> ( <b>9</b> )    | -156.4    | 79.9      | -101.3      | 112.9       | 57.8              |
| Boc-Dmaa-D-Pro-Acpc-Chg-NMe <sub>2</sub> ( <b>11</b> )   | -153.4    | 82.1      | -131.2      | 139.6       | 50.6              |
| Boc-Dmaa-D-Pro-Acpc-Phe-NMe <sub>2</sub> ( <b>12</b> )   | -152.5    | 77.2      | -90.8       | 135.5       | 58.9              |
| Boc-Dmaa-D-Pro-Acpc-Phe-OMe ( <b>13</b> )                | -136.9    | 147.3     | -129.0      | 81.9        | 45.9              |
| Boc-Dmaa-D-Pro-Acpc-D-Phe-NMe <sub>2</sub> ( <b>14</b> ) | -130.4    | 132.9     | 156.3       | -77.8       | 43.4              |
| Boc-Dmaa-Pro-Acpc-Leu-OMe ( <b>15</b> )                  | -89.6     | 158.0     | -142.5      | 81.6        | 64.8              |
| Boc-Dmaa-D-Pro-Acpc-Leu-NMe <sub>2</sub> ( <b>16a</b> )  | -156.5    | 89.0      | -80.6       | 130.8       | 57.4              |
| Boc-Dmaa-D-Pro-Acpc-Leu-NMe <sub>2</sub> ( <b>16b</b> )  | -126.3    | 52.2      | -121.3      | 141.7       | 64.9              |
| Boc-Dmaa-D-Pro-Aic-D-Phe-NMe <sub>2</sub> ( <b>20a</b> ) | -171.1    | 127.1     | 54.2        | -131.6      | 28.2              |
| Boc-Dmaa-D-Pro-Aic-D-Phe-NMe <sub>2</sub> ( <b>20b</b> ) | -146.8    | 156.9     | 67.8        | -134.9      | 13.7              |
| Boc-Dmaa-Pro-Aic-Leu-OMe ( <b>21a</b> )                  | -129.4    | 161.3     | -55.3       | 136.3       | 34.4              |
| Boc-Dmaa-Pro-Aic-Leu-OMe ( <b>21b</b> )                  | -139.2    | 165.1     | -53.4       | 137.7       | 34.4              |
| Boc-Dmaa-D-Pro-Aib-Leu-NMe <sub>2</sub> ( <b>24</b> )    | -135.4    | 95.5      | -121.9      | 75.3        | 60.3              |
| Boc-Dmaa-D-Pro-Aib-Leu-OMe ( <b>25</b> )                 | -133.6    | 97.6      | -104.1      | 62.9        | 82.0              |
| Boc-Dmaa-D-Pro-Aib-Val-OMe ( <b>26</b> )                 | -159.2    | 90.1      | -118.5      | -168.4      | 45.9              |
| Boc-Dmaa-D-Pro-Aib-Phe-OMe ( <b>27</b> )                 | -152.9    | 79.1      | -87.8       | 148.0       | 56.3              |
| Boc-Dmaa-D-Pro-Aib-3-Pal-NMe <sub>2</sub> ( <b>28</b> )  | -162.9    | 122.8     | -81.9       | 112.4       | 50.0              |
| Boc-Dmaa-D-Pro-Aib-2-Thi-NMe <sub>2</sub> ( <b>29a</b> ) | -149.6    | 84.3      | -85.3       | 145.8       | 55.6              |
| Boc-Dmaa-D-Pro-Aib-2-Thi-NMe <sub>2</sub> ( <b>29b</b> ) | -150.5    | 77.1      | -89.4       | 144.4       | 54.8              |
| Boc-Dmaa-Pro-Aib-Leu-OMe ( <b>30</b> )                   | -138.7    | 159.8     | -55.1       | 136.6       | 34.0              |
| Boc-Dmaa-D-Pro-Ala-Phe-OMe ( <b>31</b> )                 | -136.5    | 147.7     | -130.3      | 81.9        | 48.0              |
| Boc-Keto-D-Pro-Aib-Phe-OMe ( <b>34</b> )                 | -138.5    | 63.4      | -108.9      | 140.7       | 62.3              |
| <b>average</b>                                           | -141.381  | 112.34    | -72.2       | 71.233      | 49.7              |
| <b>st. dev.</b>                                          | 18.60356  | 36.723    | 73.31       | 104.17      | 14.6              |
| <b>median</b>                                            | -141      | 97.6      | -96.2       | 117.6       | 50.6              |
| <b>minimum</b>                                           | -171.1    | 52.2      | -142.5      | -168.4      | 13.7              |
| <b>maximum</b>                                           | -89.6     | 165.1     | 156.3       | 148         | 82.0              |
| <b>count</b>                                             | 27        | 27        | 27          | 27          | 27                |

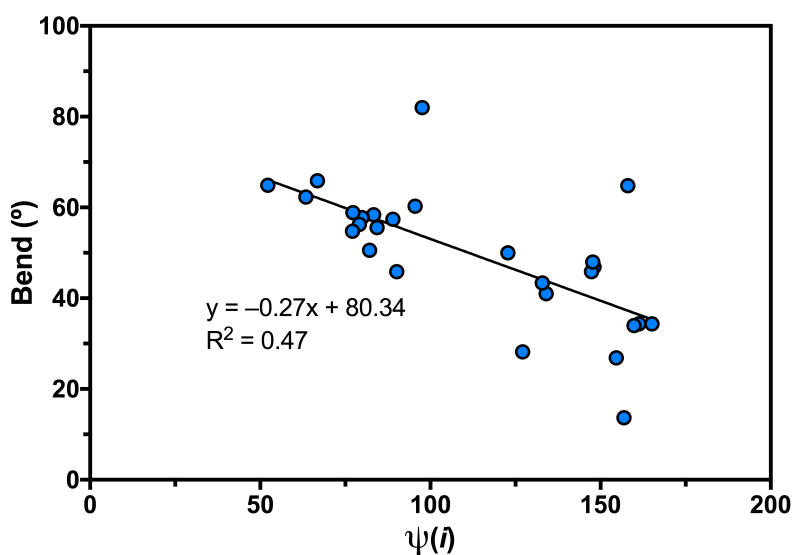**Figure S4.06:** A plot of backbone bend ( $^\circ$ ) vs.  $\psi(i)$  shows a loose correlation.

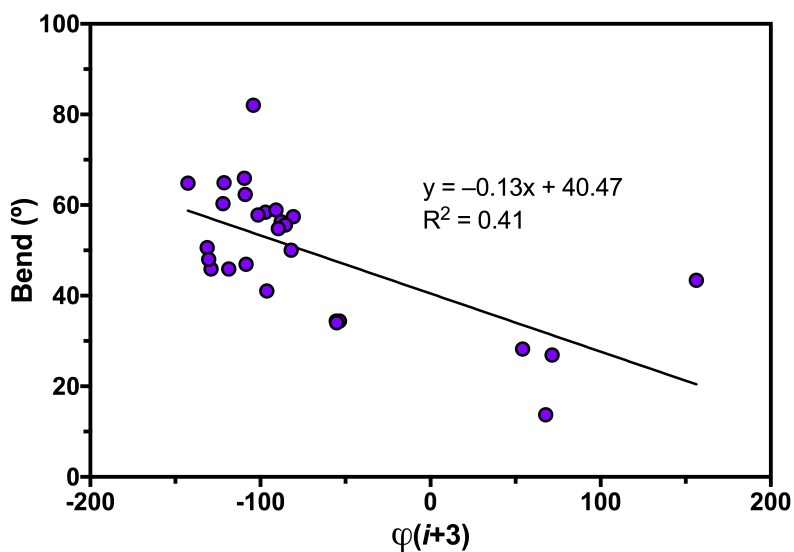

Figure S4.07: A plot of backbone bend (°) vs.  $\phi(i+3)$  shows a loose correlation.

Table S4.14: Backbone Twisting ( $\varpi$ ) in Type II'  $\beta$ -Turns<sup>20</sup>

| Type II' $\beta$ -Turns                         | twist ( $\varpi$ ) |
|-------------------------------------------------|--------------------|
| Boc-Dmaa-D-Pro-Acpc-Leu-NMe <sub>2</sub> (3a)   | 9.38               |
| Boc-Dmaa-D-Pro-Acpc-Leu-NMe <sub>2</sub> (3b)   | -21.31             |
| Boc-Leu-D-Pro-Acpc-Leu-OMe (6)                  | -20.63             |
| Boc-Dmaa-D-Pro-Acpc-Gly-OMe (7a)                | -0.78              |
| Boc-Dmaa-D-Pro-Acpc-Nle-NMe <sub>2</sub> (8)    | -9.42              |
| Boc-Dmaa-D-Pro-Acpc-Val-NMe <sub>2</sub> (9)    | -9.18              |
| Boc-Dmaa-D-Pro-Acpc-Chg-NMe <sub>2</sub> (11)   | -5.41              |
| Boc-Dmaa-D-Pro-Acpc-Phe-NMe <sub>2</sub> (12)   | -0.23              |
| Boc-Dmaa-D-Pro-Acpc-Phe-OMe (13)                | -24.78             |
| Boc-Dmaa-D-Pro-Acpc-D-Phe-NMe <sub>2</sub> (14) | -8.51              |
| Boc-Dmaa-D-Pro-Acpc-Leu-NMe <sub>2</sub> (16a)  | -7.86              |
| Boc-Dmaa-D-Pro-Acpc-Leu-NMe <sub>2</sub> (16b)  | 17.80              |
| Boc-Dmaa-D-Pro-Aic-D-Phe-NMe <sub>2</sub> (20a) | -3.48              |
| Boc-Dmaa-D-Pro-Aic-D-Phe-NMe <sub>2</sub> (20b) | 3.91               |
| Boc-Dmaa-D-Pro-Aib-Leu-NMe <sub>2</sub> (24)    | 2.16               |
| Boc-Dmaa-D-Pro-Aib-Leu-OMe (25)                 | -6.53              |
| Boc-Dmaa-D-Pro-Aib-Val-OMe (26)                 | -6.88              |
| Boc-Dmaa-D-Pro-Aib-Phe-OMe (27)                 | 4.82               |
| Boc-Dmaa-D-Pro-Aib-3-Pal-NMe <sub>2</sub> (28)  | 6.85               |
| Boc-Dmaa-D-Pro-Aib-2-Thi-NMe <sub>2</sub> (29a) | -1.29              |
| Boc-Dmaa-D-Pro-Aib-2-Thi-NMe <sub>2</sub> (29b) | -0.07              |
| Boc-Dmaa-D-Pro-Ala-Phe-OMe (31)                 | -30.17             |
| Boc-Keto-D-Pro-Aib-Phe-OMe (34)                 | 9.75               |
| <b>average</b>                                  | -4.43              |
| <b>st. dev.</b>                                 | 11.65              |
| <b>median</b>                                   | -3.48              |
| <b>minimum</b>                                  | -30.17             |
| <b>maximum</b>                                  | 17.80              |
| <b>count</b>                                    | 23                 |

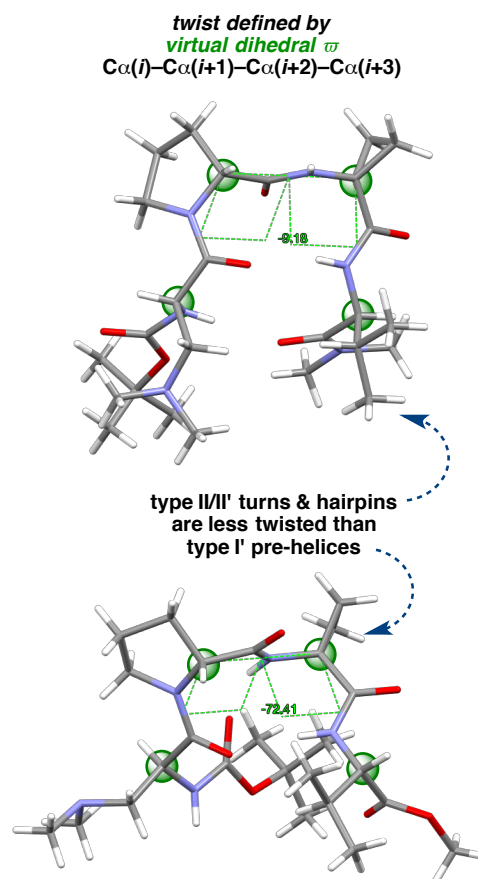

**Table S4.15:** Backbone Twisting ( $\varpi$ ) in Type II  $\beta$ -Turns<sup>20</sup>

| Type II $\beta$ -Turns                                    | twist ( $\varpi$ ) |
|-----------------------------------------------------------|--------------------|
| Boc-Dmaa-Pro-Acpc-Leu-OMe ( <b>15</b> )                   | 8.44               |
| Boc-Dmaa-Pro-Aic-Leu-OMe ( <b>19a</b> )                   | 12.09              |
| Boc-Dmaa-Pro-Aic-Leu-OMe ( <b>19b</b> )                   | 14.01              |
| Boc-Dmaa-Pro-Aib-Leu-OMe ( <b>30</b> )                    | 13.88              |
| Boc-Phe-Pro-Aib-( <i>R</i> )- $\alpha$ -Mba ( <b>35</b> ) | -7.38              |
| 2-Msa-Pro-D-Val-( <i>R</i> )- $\alpha$ -Mba ( <b>36</b> ) | 16.15              |
| <b>average</b>                                            | 9.53               |
| <b>st. dev.</b>                                           | 8.68               |
| <b>median</b>                                             | 12.99              |
| <b>minimum</b>                                            | -7.38              |
| <b>maximum</b>                                            | 16.15              |
| <b>count</b>                                              | 6                  |

**Table S4.16:** Backbone Twisting ( $\varpi$ ) in Type I'  $\beta$ -Turns<sup>20</sup>

| Type I' $\beta$ -Turns                                  | twist ( $\varpi$ ) |
|---------------------------------------------------------|--------------------|
| Boc-Dmaa-D-Pro-Acpc-Leu-NMe <sub>2</sub> ( <b>3c</b> )  | -71.48             |
| Boc-Dmaa-D-Pro-Acpc-Leu-OMe ( <b>4a</b> )               | -72.82             |
| Boc-Dmaa-D-Pro-Acpc-Leu-OMe( <b>4b</b> )                | -71.04             |
| Boc-Dmaa-D-Pro-Acpc-Leu-OMe( <b>4c</b> )                | -73.04             |
| Boc-Dmaa-D-Pro-Acpc-Leu-OMe( <b>4d</b> )                | -72.38             |
| Boc-Dmaa-D-Pro-Acpc-Leu-OMe( <b>4e</b> )                | -71.17             |
| Boc-Cys(Ph)-D-Pro-Acpc-Leu-OMe ( <b>5</b> )             | -71.37             |
| Boc-Dmaa-D-Pro-Acpc-Gly-OMe ( <b>7b</b> )               | -70.08             |
| Boc-Dmaa-D-Pro-Acpc-Val-OMe ( <b>9</b> )                | -72.41             |
| Boc-Dmaa-D-Pro-Acbc-Leu-NMe <sub>2</sub> ( <b>16c</b> ) | -72.39             |
| Boc-Dmaa-D-Pro-Acbc-Leu-OMe ( <b>17a</b> )              | -76.16             |
| Boc-Dmaa-D-Pro-Acbc-Leu-OMe ( <b>17b</b> )              | -71.27             |
| Boc-Dmaa-D-Pro-Cle-Leu-OMe ( <b>18a</b> )               | -70.75             |
| Boc-Dmaa-D-Pro-Cle-Leu-OMe ( <b>18b</b> )               | -72.21             |
| Boc-Dmaa-D-Pro-Aic-Leu-OMe ( <b>19a</b> )               | -71.48             |
| Boc-Dmaa-D-Pro-Aic-Leu-OMe ( <b>19b</b> )               | -59.96             |
| Boc-Dmaa-D-Pro-Achc-Leu-OMe ( <b>22a</b> )              | -78.60             |
| Boc-Dmaa-D-Pro-Achc-Leu-OMe ( <b>22b</b> )              | -71.50             |
| Boc-Cys(Ph)-D-Pro-Achc-Leu-OMe ( <b>23</b> )            | -79.60             |
| Boc-Dmaa-D-Pro-Gly-Leu-OMe ( <b>33a</b> )               | -63.05             |
| Boc-Dmaa-D-Pro-Gly-Leu-OMe ( <b>33b</b> )               | -65.25             |
| <b>average</b>                                          | -71.33             |
| <b>st. dev.</b>                                         | 4.42               |
| <b>median</b>                                           | -71.48             |
| <b>minimum</b>                                          | -79.60             |
| <b>maximum</b>                                          | -59.96             |
| <b>count</b>                                            | 21                 |

**Table S4.17: Proline C $\gamma$ -Puckering<sup>21</sup>**

| Peptide Sequence                                                       | Proline Pucker                                    |                   |
|------------------------------------------------------------------------|---------------------------------------------------|-------------------|
|                                                                        | C $\alpha$ -C $\beta$ -C $\gamma$ -C $\delta$ (°) | endo/exo          |
| Boc-Dmaa-D-Pro-Acpc-Leu-NMe <sub>2</sub> ( <b>3a</b> )                 | -41.5                                             | endo              |
| Boc-Dmaa-D-Pro-Acpc-Leu-NMe <sub>2</sub> ( <b>3b</b> )                 | 37.1                                              | exo               |
| Boc-Dmaa-D-Pro-Acpc-Leu-NMe <sub>2</sub> ( <b>3c</b> )                 | -37.0                                             | endo              |
| Boc-Dmaa-D-Pro-Acpc-Leu-OMe ( <b>4a</b> )                              | -36.2                                             | endo              |
| Boc-Dmaa-D-Pro-Acpc-Leu-OMe ( <b>4b</b> )                              | -36.5                                             | endo              |
| Boc-Dmaa-D-Pro-Acpc-Leu-OMe ( <b>4c</b> )                              | -39.0                                             | endo              |
| Boc-Dmaa-D-Pro-Acpc-Leu-OMe ( <b>4d</b> )                              | -38.1                                             | endo              |
| Boc-Dmaa-D-Pro-Acpc-Leu-OMe ( <b>4e</b> )                              | -39.0                                             | endo              |
| Boc-Cys(Ph)-D-Pro-Acpc-Leu-OMe ( <b>5</b> )                            | 39.3                                              | exo               |
| Boc-Leu-D-Pro-Acpc-Leu-OMe ( <b>6</b> )                                | -39.7                                             | endo              |
| Boc-Dmaa-D-Pro-Acpc-Gly-OMe ( <b>7a</b> )                              | 36.2                                              | exo               |
| Boc-Dmaa-D-Pro-Acpc-Gly-OMe ( <b>7b</b> )                              | 37.6                                              | exo               |
| Boc-Dmaa-D-Pro-Acpc-Nle-NMe <sub>2</sub> ( <b>8</b> )                  | 37.4                                              | exo               |
| Boc-Dmaa-D-Pro-Acpc-Val-NMe <sub>2</sub> ( <b>9</b> )                  | 38.3                                              | exo               |
| Boc-Dmaa-D-Pro-Acpc-Val-OMe ( <b>10</b> )                              | -39.3                                             | endo              |
| Boc-Dmaa-D-Pro-Acpc-Chg-NMe <sub>2</sub> ( <b>11</b> )                 | 37.2                                              | exo               |
| Boc-Dmaa-D-Pro-Acpc-Phe-NMe <sub>2</sub> ( <b>12</b> )                 | 37.3                                              | exo               |
| Boc-Dmaa-D-Pro-Acpc-Phe-OMe ( <b>13</b> )                              | 37.1                                              | exo               |
| Boc-Dmaa-D-Pro-Acpc-D-Phe-NMe <sub>2</sub> ( <b>14</b> )               | -41.4                                             | endo              |
| Boc-Dmaa-Pro-Acpc-Leu-OMe ( <b>15</b> )                                | 40.0                                              | exo               |
| Boc-Dmaa-D-Pro-Acbc-Leu-NMe <sub>2</sub> ( <b>16a</b> )                | 37.7                                              | exo               |
| Boc-Dmaa-D-Pro-Acbc-Leu-NMe <sub>2</sub> ( <b>16b</b> )                | -37.8                                             | endo              |
| Boc-Dmaa-D-Pro-Acbc-Leu-NMe <sub>2</sub> ( <b>16c</b> )                | -36.3                                             | endo              |
| Boc-Dmaa-D-Pro-Acbc-Leu-OMe ( <b>17a</b> )                             | -35.3                                             | endo              |
| Boc-Dmaa-D-Pro-Acbc-Leu-OMe ( <b>17b</b> )                             | 37.5                                              | exo               |
| Boc-Dmaa-D-Pro-Cle-Leu-OMe ( <b>18a</b> )                              | 38.6                                              | exo               |
| Boc-Dmaa-D-Pro-Cle-Leu-OMe ( <b>18b</b> )                              | -38.6                                             | endo              |
| Boc-Dmaa-D-Pro-Aic-Leu-OMe ( <b>19a</b> )                              | 37.0                                              | exo               |
| Boc-Dmaa-D-Pro-Aic-Leu-OMe ( <b>19b</b> )                              | -39.2                                             | endo              |
| Boc-Dmaa-D-Pro-Aic-D-Phe-NMe <sub>2</sub> ( <b>20a</b> )               | 34.0                                              | exo               |
| Boc-Dmaa-D-Pro-Aic-D-Phe-NMe <sub>2</sub> ( <b>20b</b> )               | -42.1                                             | endo              |
| Boc-Dmaa-Pro-Aic-Leu-OMe ( <b>21a</b> )                                | 37.4                                              | exo               |
| Boc-Dmaa-Pro-Aic-Leu-OMe ( <b>21b</b> )                                | 37.3                                              | exo               |
| Boc-Dmaa-D-Pro-Achc-Leu-OMe ( <b>22a</b> )                             | -34.7                                             | endo              |
| Boc-Dmaa-D-Pro-Achc-Leu-OMe ( <b>22b</b> )                             | 38.3                                              | exo               |
| Boc-Cys(Ph)-D-Pro-Achc-Leu-OMe ( <b>23</b> )                           | 41.9                                              | exo               |
| Boc-Dmaa-D-Pro-Aib-Leu-NMe <sub>2</sub> ( <b>24</b> )                  | 33.8                                              | exo               |
| Boc-Dmaa-D-Pro-Aib-Leu-OMe ( <b>25</b> )                               | 36.7                                              | exo               |
| Boc-Dmaa-D-Pro-Aib-Val-OMe ( <b>26</b> )                               | 37.4                                              | exo               |
| Boc-Dmaa-D-Pro-Aib-Phe-OMe ( <b>27</b> )                               | -36.8                                             | endo              |
| Boc-Dmaa-D-Pro-Aib-3-Pal-NMe <sub>2</sub> ( <b>28</b> )                | -39.0                                             | endo              |
| Boc-Dmaa-D-Pro-Aib-2-Thi-NMe <sub>2</sub> ( <b>29a</b> )               | 31.0                                              | exo               |
| Boc-Dmaa-D-Pro-Aib-2-Thi-NMe <sub>2</sub> ( <b>29b</b> )               | 29.0                                              | exo               |
| Boc-Dmaa-Pro-Aib-Leu-OMe ( <b>30</b> )                                 | 36.8                                              | exo               |
| Boc-Dmaa-D-Pro-Ala-Phe-OMe ( <b>31</b> )                               | 37.3                                              | exo               |
| Boc-Dmaa-D-Pro-Phe-Leu-NMe <sub>2</sub> ( <b>32a</b> )                 | 36.8                                              | exo               |
| Boc-Dmaa-D-Pro-Phe-Leu-NMe <sub>2</sub> ( <b>32b</b> )                 | 37.2                                              | exo               |
| Boc-Dmaa-D-Pro-Gly-Leu-OMe ( <b>33a</b> )                              | -27.8                                             | endo              |
| Boc-Dmaa-D-Pro-Gly-Leu-OMe ( <b>33b</b> )                              | 38.8                                              | exo               |
| Boc-Keto-D-Pro-Aib-Phe-OMe ( <b>34</b> )                               | -36.3                                             | endo              |
| Boc-Phe-Pro-Aib-( <i>R</i> )- $\alpha$ -Mba ( <b>35</b> )              | 36.7                                              | exo               |
| 2-Msa-Pro-D-Val-( <i>R</i> )- $\alpha$ -Mba ( <b>36</b> )              | -35.0                                             | endo              |
| Boc-His( $\tau$ -Bn)-Pro-Aib-( <i>R</i> )- $\alpha$ -Mba ( <b>37</b> ) | 41.5                                              | exo               |
| <b>average</b>                                                         | 6.1                                               | <b>endo count</b> |
| <b>st. dev.</b>                                                        | 37.2                                              | 22                |
| <b>median</b>                                                          | 36.2                                              | <b>exo count</b>  |
| <b>minimum</b>                                                         | -42.1                                             | 31                |
| <b>maximum</b>                                                         | 41.9                                              | <b>total</b>      |
| <b>count</b>                                                           | 53                                                | 53                |

**Table S4.18: Proline C $\gamma$ -endo-Puckering<sup>21</sup>**

| <i>endo</i>                                               | C $\alpha$ -C $\beta$ -C $\gamma$ -C $\delta$ (°) |
|-----------------------------------------------------------|---------------------------------------------------|
| Boc-Dmaa-D-Pro-Acpc-Leu-NMe <sub>2</sub> ( <b>3a</b> )    | -41.5                                             |
| Boc-Dmaa-D-Pro-Acpc-Leu-NMe <sub>2</sub> ( <b>3c</b> )    | -37.0                                             |
| Boc-Dmaa-D-Pro-Acpc-Leu-OMe ( <b>4a</b> )                 | -36.2                                             |
| Boc-Dmaa-D-Pro-Acpc-Leu-OMe ( <b>4b</b> )                 | -36.5                                             |
| Boc-Dmaa-D-Pro-Acpc-Leu-OMe ( <b>4c</b> )                 | -39.0                                             |
| Boc-Dmaa-D-Pro-Acpc-Leu-OMe ( <b>4d</b> )                 | -38.1                                             |
| Boc-Dmaa-D-Pro-Acpc-Leu-OMe ( <b>4e</b> )                 | -39.0                                             |
| Boc-Leu-D-Pro-Acpc-Leu-OMe ( <b>6</b> )                   | -39.7                                             |
| Boc-Dmaa-D-Pro-Acpc-Val-OMe ( <b>10</b> )                 | -39.3                                             |
| Boc-Dmaa-D-Pro-Acpc-D-Phe-NMe <sub>2</sub> ( <b>14</b> )  | -41.4                                             |
| Boc-Dmaa-D-Pro-Acbc-Leu-NMe <sub>2</sub> ( <b>16b</b> )   | -37.8                                             |
| Boc-Dmaa-D-Pro-Acbc-Leu-NMe <sub>2</sub> ( <b>16c</b> )   | -36.3                                             |
| Boc-Dmaa-D-Pro-Acbc-Leu-OMe ( <b>17a</b> )                | -35.3                                             |
| Boc-Dmaa-D-Pro-Cle-Leu-OMe ( <b>18b</b> )                 | -38.6                                             |
| Boc-Dmaa-D-Pro-Aic-Leu-OMe ( <b>19b</b> )                 | -39.2                                             |
| Boc-Dmaa-D-Pro-Aic-D-Phe-NMe <sub>2</sub> ( <b>20b</b> )  | -42.1                                             |
| Boc-Dmaa-D-Pro-Achc-Leu-OMe ( <b>22a</b> )                | -34.7                                             |
| Boc-Dmaa-D-Pro-Aib-Phe-OMe ( <b>27</b> )                  | -36.8                                             |
| Boc-Dmaa-D-Pro-Aib-3-Pal-NMe <sub>2</sub> ( <b>28</b> )   | -39.0                                             |
| Boc-Dmaa-D-Pro-Gly-Leu-OMe ( <b>33a</b> )                 | -27.8                                             |
| Boc-Keto-D-Pro-Aib-Phe-OMe ( <b>34</b> )                  | -36.3                                             |
| 2-Msa-Pro-D-Val-( <i>R</i> )- $\alpha$ -Mba ( <b>36</b> ) | -35.0                                             |
| <b>average</b>                                            | -37.6                                             |
| <b>st. dev.</b>                                           | 3.0                                               |
| <b>median</b>                                             | -38.0                                             |
| <b>minimum</b>                                            | -42.1                                             |
| <b>maximum</b>                                            | -27.8                                             |
| <b>count</b>                                              | 22                                                |

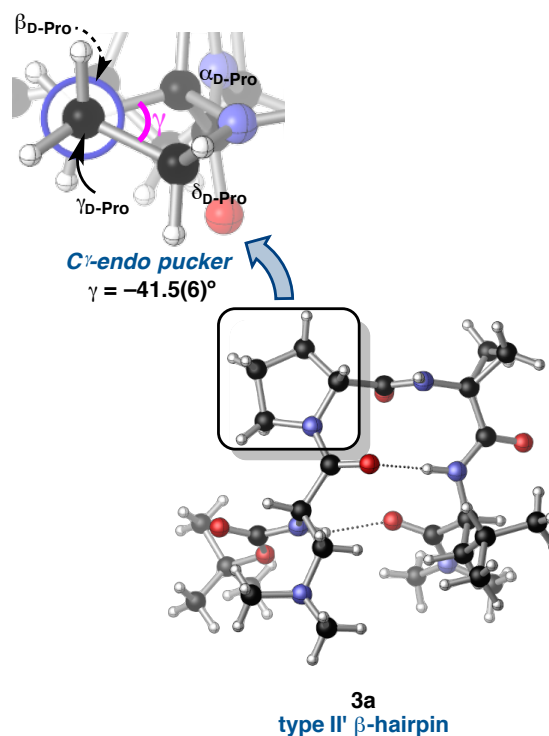

**Table S4.19: Proline C $\gamma$ -*exo*-Puckering<sup>21</sup>**

| <i>exo</i>                                                             | C $\alpha$ -C $\beta$ -C $\gamma$ -C $\delta$ (°) |
|------------------------------------------------------------------------|---------------------------------------------------|
| Boc-Dmaa-D-Pro-Acpc-Leu-NMe <sub>2</sub> ( <b>3b</b> )                 | 37.1                                              |
| Boc-Cys(Ph)-D-Pro-Acpc-Leu-OMe ( <b>5</b> )                            | 39.3                                              |
| Boc-Dmaa-D-Pro-Acpc-Gly-OMe ( <b>7a</b> )                              | 36.2                                              |
| Boc-Dmaa-D-Pro-Acpc-Gly-OMe ( <b>7b</b> )                              | 37.6                                              |
| Boc-Dmaa-D-Pro-Acpc-Nle-NMe <sub>2</sub> ( <b>8</b> )                  | 37.4                                              |
| Boc-Dmaa-D-Pro-Acpc-Val-NMe <sub>2</sub> ( <b>9</b> )                  | 38.3                                              |
| Boc-Dmaa-D-Pro-Acpc-Chg-NMe <sub>2</sub> ( <b>11</b> )                 | 37.2                                              |
| Boc-Dmaa-D-Pro-Acpc-Phe-NMe <sub>2</sub> ( <b>12</b> )                 | 37.3                                              |
| Boc-Dmaa-D-Pro-Acpc-Phe-OMe ( <b>13</b> )                              | 37.1                                              |
| Boc-Dmaa-Pro-Acpc-Leu-OMe ( <b>15</b> )                                | 40.0                                              |
| Boc-Dmaa-D-Pro-Acpc-Leu-NMe <sub>2</sub> ( <b>16a</b> )                | 37.7                                              |
| Boc-Dmaa-D-Pro-Acpc-Leu-OMe ( <b>17b</b> )                             | 37.5                                              |
| Boc-Dmaa-D-Pro-Cle-Leu-OMe ( <b>18a</b> )                              | 38.6                                              |
| Boc-Dmaa-D-Pro-Aic-Leu-OMe ( <b>19a</b> )                              | 37.0                                              |
| Boc-Dmaa-D-Pro-Aic-D-Phe-NMe <sub>2</sub> ( <b>20a</b> )               | 34.0                                              |
| Boc-Dmaa-Pro-Aic-Leu-OMe ( <b>21a</b> )                                | 37.4                                              |
| Boc-Dmaa-Pro-Aic-Leu-OMe ( <b>21b</b> )                                | 37.3                                              |
| Boc-Dmaa-D-Pro-Achc-Leu-OMe ( <b>22b</b> )                             | 38.3                                              |
| Boc-Cys(Ph)-D-Pro-Achc-Leu-OMe ( <b>23</b> )                           | 41.9                                              |
| Boc-Dmaa-D-Pro-Aib-Leu-NMe <sub>2</sub> ( <b>24</b> )                  | 33.8                                              |
| Boc-Dmaa-D-Pro-Aib-Leu-OMe ( <b>25</b> )                               | 36.7                                              |
| Boc-Dmaa-D-Pro-Aib-Val-OMe ( <b>26</b> )                               | 37.4                                              |
| Boc-Dmaa-D-Pro-Aib-2-Thi-NMe <sub>2</sub> ( <b>29a</b> )               | 31.0                                              |
| Boc-Dmaa-D-Pro-Aib-2-Thi-NMe <sub>2</sub> ( <b>29b</b> )               | 29.0                                              |
| Boc-Dmaa-Pro-Aib-Leu-OMe ( <b>30</b> )                                 | 36.8                                              |
| Boc-Dmaa-D-Pro-Ala-Phe-OMe ( <b>31</b> )                               | 37.3                                              |
| Boc-Dmaa-D-Pro-Phe-Leu-NMe <sub>2</sub> ( <b>32a</b> )                 | 36.8                                              |
| Boc-Dmaa-D-Pro-Phe-Leu-NMe <sub>2</sub> ( <b>32b</b> )                 | 37.2                                              |
| Boc-Dmaa-D-Pro-Gly-Leu-OMe ( <b>33b</b> )                              | 38.8                                              |
| Boc-Phe-Pro-Aib-( <i>R</i> )- $\alpha$ -Mba ( <b>35</b> )              | 36.7                                              |
| Boc-His( $\tau$ -Bn)-Pro-Aib-( <i>R</i> )- $\alpha$ -Mba ( <b>37</b> ) | 41.5                                              |
| <b>average</b>                                                         | 37.1                                              |
| <b>st. dev.</b>                                                        | 2.5                                               |
| <b>median</b>                                                          | 37.3                                              |
| <b>minimum</b>                                                         | 29.0                                              |
| <b>maximum</b>                                                         | 41.9                                              |
| <b>count</b>                                                           | 31                                                |

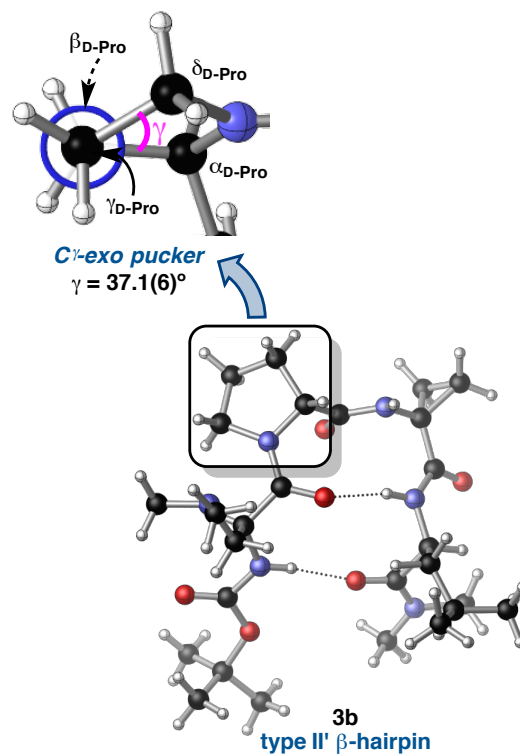



**Table S4.20:** Effect of Proline C $\gamma$ -Puckering on Backbone  $\phi, \psi$  Dihedrals in Type II'  $\beta$ -Turns

| Type II' $\beta$ -Turns                                  | <i>i+1</i>  |             | <i>i+2</i>  |             | Proline Pucker                                             |                   |               |
|----------------------------------------------------------|-------------|-------------|-------------|-------------|------------------------------------------------------------|-------------------|---------------|
|                                                          | $\phi(i+1)$ | $\psi(i+1)$ | $\phi(i+2)$ | $\psi(i+2)$ | C $\alpha$ -C $\beta$ -C $\gamma$ -C $\delta$ ( $^\circ$ ) | endo/exo          |               |
| Boc-Dmaa-D-Pro-Acpc-Leu-NMe <sub>2</sub> ( <b>3a</b> )   | 63.6        | -113.0      | -77.2       | -3.7        | -41.5                                                      | endo              |               |
| Boc-Dmaa-D-Pro-Acpc-Leu-NMe <sub>2</sub> ( <b>3b</b> )   | 62.9        | -132.0      | -78.1       | -5.3        | 37.1                                                       | exo               |               |
| Boc-Leu-D-Pro-Acpc-Leu-OMe ( <b>6</b> )                  | 50.8        | -134.1      | -80.6       | -5.9        | -39.7                                                      | endo              |               |
| Boc-Dmaa-D-Pro-Acpc-Gly-OMe ( <b>7a</b> )                | 69.1        | -123.1      | -76.4       | -3.0        | 36.2                                                       | exo               |               |
| Boc-Dmaa-D-Pro-Acpc-Nle-NMe <sub>2</sub> ( <b>8</b> )    | 62.0        | -130.1      | -74.4       | -5.5        | 37.4                                                       | exo               |               |
| Boc-Dmaa-D-Pro-Acpc-Val-NMe <sub>2</sub> ( <b>9</b> )    | 58.0        | -133.0      | -70.5       | -10.3       | 38.3                                                       | exo               |               |
| Boc-Dmaa-D-Pro-Acpc-Chg-NMe <sub>2</sub> ( <b>11</b> )   | 61.6        | -129.8      | -75.5       | -3.6        | 37.2                                                       | exo               |               |
| Boc-Dmaa-D-Pro-Acpc-Phe-NMe <sub>2</sub> ( <b>12</b> )   | 63.6        | -125.7      | -72.0       | -9.2        | 37.3                                                       | exo               |               |
| Boc-Dmaa-D-Pro-Acpc-Phe-OMe ( <b>13</b> )                | 58.6        | -136.9      | -84.3       | 8.8         | 37.1                                                       | exo               |               |
| Boc-Dmaa-D-Pro-Acpc-D-Phe-NMe <sub>2</sub> ( <b>14</b> ) | 52.7        | -135.3      | -70.5       | -8.6        | -41.4                                                      | endo              |               |
| Boc-Dmaa-D-Pro-Acpc-Leu-NMe <sub>2</sub> ( <b>16a</b> )  | 71.0        | -128.0      | -71.0       | -20.6       | 37.7                                                       | exo               |               |
| Boc-Dmaa-D-Pro-Acpc-Leu-NMe <sub>2</sub> ( <b>16b</b> )  | 67.9        | -116.6      | -66.8       | -14.6       | -37.8                                                      | endo              |               |
| Boc-Dmaa-D-Pro-Aic-D-Phe-NMe <sub>2</sub> ( <b>20a</b> ) | 57.6        | -134.6      | -59.0       | -31.4       | 34.0                                                       | exo               |               |
| Boc-Dmaa-D-Pro-Aic-D-Phe-NMe <sub>2</sub> ( <b>20b</b> ) | 59.4        | -134.2      | -64.3       | -14.6       | -42.1                                                      | endo              |               |
| Boc-Dmaa-D-Pro-Aib-Leu-NMe <sub>2</sub> ( <b>24</b> )    | 59.3        | -129.9      | -63.6       | -14.7       | 33.8                                                       | exo               |               |
| Boc-Dmaa-D-Pro-Aib-Leu-OMe ( <b>25</b> )                 | 60.4        | -136.0      | -62.0       | -21.3       | 36.7                                                       | exo               |               |
| Boc-Dmaa-D-Pro-Aib-Val-OMe ( <b>26</b> )                 | 63.1        | -133.7      | -68.1       | -13.6       | 37.4                                                       | exo               |               |
| Boc-Dmaa-D-Pro-Aib-Phe-OMe ( <b>27</b> )                 | 54.4        | -127.3      | -58.5       | -26.2       | -36.8                                                      | endo              |               |
| Boc-Dmaa-D-Pro-Aib-3-Pal-NMe <sub>2</sub> ( <b>28</b> )  | 52.6        | -129.3      | -59.9       | -23.5       | -39.0                                                      | endo              |               |
| Boc-Dmaa-D-Pro-Aib-2-Thi-NMe <sub>2</sub> ( <b>29a</b> ) | 60.8        | -130.7      | -61.0       | -23.2       | 31.0                                                       | exo               |               |
| Boc-Dmaa-D-Pro-Aib-2-Thi-NMe <sub>2</sub> ( <b>29b</b> ) | 61.7        | -132.1      | -60.3       | -22.5       | 29.0                                                       | exo               |               |
| Boc-Dmaa-D-Pro-Ala-Phe-OMe ( <b>31</b> )                 | 60.1        | -139.6      | -93.4       | 22.5        | 37.3                                                       | exo               |               |
| Boc-Keto-D-Pro-Aib-Phe-OMe ( <b>34</b> )                 | 62.1        | -123.7      | -61.4       | -19.7       | -36.3                                                      | endo              |               |
| <b>average</b>                                           | 60.6        | -129.9      | -69.9       | -11.7       | 9.7                                                        | <b>endo count</b> | <b>% endo</b> |
| <b>st. dev.</b>                                          | 5.0         | 6.3         | 9.1         | 12.0        | 36.7                                                       | 8                 | 34.8          |
| <b>median</b>                                            | 60.8        | -130.7      | -70.5       | -13.6       | 34.0                                                       | <b>exo count</b>  | <b>% exo</b>  |
| <b>minimum</b>                                           | 50.8        | -139.6      | -93.4       | -31.4       | -42.1                                                      | 15                | 65.2          |
| <b>maximum</b>                                           | 71.0        | -113.0      | -58.5       | 22.5        | 38.3                                                       | <b>total</b>      | <b>total</b>  |
| <b>count</b>                                             | 23          | 23          | 23          | 23          | 23                                                         | 23                | 100.0         |
| Type II' $\beta$ -Turns, <i>endo</i>                     | <i>i+1</i>  |             | <i>i+2</i>  |             | Proline Pucker                                             |                   |               |
|                                                          | $\phi(i+1)$ | $\psi(i+1)$ | $\phi(i+2)$ | $\psi(i+2)$ | C $\alpha$ -C $\beta$ -C $\gamma$ -C $\delta$ ( $^\circ$ ) | endo/exo          |               |
| Boc-Dmaa-D-Pro-Acpc-Leu-NMe <sub>2</sub> ( <b>3a</b> )   | 63.6        | -113.0      | -77.2       | -3.7        | -41.5                                                      | endo              |               |
| Boc-Leu-D-Pro-Acpc-Leu-OMe ( <b>6</b> )                  | 50.8        | -134.1      | -80.6       | -5.9        | -39.7                                                      | endo              |               |
| Boc-Dmaa-D-Pro-Acpc-D-Phe-NMe <sub>2</sub> ( <b>14</b> ) | 52.7        | -135.3      | -70.5       | -8.6        | -41.4                                                      | endo              |               |
| Boc-Dmaa-D-Pro-Acpc-Leu-NMe <sub>2</sub> ( <b>16b</b> )  | 67.9        | -116.6      | -66.8       | -14.6       | -37.8                                                      | endo              |               |
| Boc-Dmaa-D-Pro-Aic-D-Phe-NMe <sub>2</sub> ( <b>20b</b> ) | 59.4        | -134.2      | -64.3       | -14.6       | -42.1                                                      | endo              |               |
| Boc-Dmaa-D-Pro-Aib-Phe-OMe ( <b>27</b> )                 | 54.4        | -127.3      | -58.5       | -26.2       | -36.8                                                      | endo              |               |
| Boc-Dmaa-D-Pro-Aib-3-Pal-NMe <sub>2</sub> ( <b>28</b> )  | 52.6        | -129.3      | -59.9       | -23.5       | -39.0                                                      | endo              |               |
| Boc-Keto-D-Pro-Aib-Phe-OMe ( <b>34</b> )                 | 62.1        | -123.7      | -61.4       | -19.7       | -36.3                                                      | endo              |               |
| <b>average</b>                                           | 57.9        | -126.7      | -67.4       | -14.6       | -39.3                                                      | <b>endo count</b> | <b>% endo</b> |
| <b>st. dev.</b>                                          | 6.2         | 8.4         | 8.1         | 8.2         | 2.2                                                        | 8                 | 100.0         |
| <b>median</b>                                            | 56.9        | -128.3      | -65.6       | -14.6       | -39.4                                                      | <b>exo count</b>  | <b>% exo</b>  |
| <b>minimum</b>                                           | 50.8        | -135.3      | -80.6       | -26.2       | -42.1                                                      | 0                 | 0.0           |
| <b>maximum</b>                                           | 67.9        | -113.0      | -58.5       | -3.7        | -36.3                                                      | <b>total</b>      | <b>total</b>  |
| <b>count</b>                                             | 8           | 8           | 8           | 8           | 8                                                          | 8                 | 100.0         |
| Type II' $\beta$ -Turns, <i>exo</i>                      | <i>i+1</i>  |             | <i>i+2</i>  |             | Proline Pucker                                             |                   |               |
|                                                          | $\phi(i+1)$ | $\psi(i+1)$ | $\phi(i+2)$ | $\psi(i+2)$ | C $\alpha$ -C $\beta$ -C $\gamma$ -C $\delta$ ( $^\circ$ ) | endo/exo          |               |
| Boc-Dmaa-D-Pro-Acpc-Leu-NMe <sub>2</sub> ( <b>3b</b> )   | 62.9        | -132.0      | -78.1       | -5.3        | 37.1                                                       | exo               |               |
| Boc-Dmaa-D-Pro-Acpc-Gly-OMe ( <b>7a</b> )                | 69.1        | -123.1      | -76.4       | -3.0        | 36.2                                                       | exo               |               |
| Boc-Dmaa-D-Pro-Acpc-Nle-NMe <sub>2</sub> ( <b>8</b> )    | 62.0        | -130.1      | -74.4       | -5.5        | 37.4                                                       | exo               |               |
| Boc-Dmaa-D-Pro-Acpc-Val-NMe <sub>2</sub> ( <b>9</b> )    | 58.0        | -133.0      | -70.5       | -10.3       | 38.3                                                       | exo               |               |
| Boc-Dmaa-D-Pro-Acpc-Chg-NMe <sub>2</sub> ( <b>11</b> )   | 61.6        | -129.8      | -75.5       | -3.6        | 37.2                                                       | exo               |               |
| Boc-Dmaa-D-Pro-Acpc-Phe-NMe <sub>2</sub> ( <b>12</b> )   | 63.6        | -125.7      | -72.0       | -9.2        | 37.3                                                       | exo               |               |
| Boc-Dmaa-D-Pro-Acpc-Phe-OMe ( <b>13</b> )                | 58.6        | -136.9      | -84.3       | 8.8         | 37.1                                                       | exo               |               |
| Boc-Dmaa-D-Pro-Acpc-Leu-NMe <sub>2</sub> ( <b>16a</b> )  | 71.0        | -128.0      | -71.0       | -20.6       | 37.7                                                       | exo               |               |
| Boc-Dmaa-D-Pro-Aic-D-Phe-NMe <sub>2</sub> ( <b>20a</b> ) | 57.6        | -134.6      | -59.0       | -31.4       | 34.0                                                       | exo               |               |
| Boc-Dmaa-D-Pro-Aib-Leu-NMe <sub>2</sub> ( <b>24</b> )    | 59.3        | -129.9      | -63.6       | -14.7       | 33.8                                                       | exo               |               |
| Boc-Dmaa-D-Pro-Aib-Leu-OMe ( <b>25</b> )                 | 60.4        | -136.0      | -62.0       | -21.3       | 36.7                                                       | exo               |               |
| Boc-Dmaa-D-Pro-Aib-Val-OMe ( <b>26</b> )                 | 63.1        | -133.7      | -68.1       | -13.6       | 37.4                                                       | exo               |               |
| Boc-Dmaa-D-Pro-Aib-2-Thi-NMe <sub>2</sub> ( <b>29a</b> ) | 60.8        | -130.7      | -61.0       | -23.2       | 31.0                                                       | exo               |               |
| Boc-Dmaa-D-Pro-Aib-2-Thi-NMe <sub>2</sub> ( <b>29b</b> ) | 61.7        | -132.1      | -60.3       | -22.5       | 29.0                                                       | exo               |               |
| Boc-Dmaa-D-Pro-Ala-Phe-OMe ( <b>31</b> )                 | 60.1        | -139.6      | -93.4       | 22.5        | 37.3                                                       | exo               |               |
| <b>average</b>                                           | 62.0        | -131.7      | -71.3       | -10.2       | 35.8                                                       | <b>endo count</b> | <b>% endo</b> |
| <b>st. dev.</b>                                          | 3.8         | 4.3         | 9.6         | 13.6        | 2.7                                                        | 0                 | 0.0           |
| <b>median</b>                                            | 61.6        | -132.0      | -71.0       | -10.3       | 37.1                                                       | <b>exo count</b>  | <b>% exo</b>  |
| <b>minimum</b>                                           | 57.6        | -139.6      | -93.4       | -31.4       | 29.0                                                       | 17                | 100.0         |
| <b>maximum</b>                                           | 71.0        | -123.1      | -59.0       | 22.5        | 38.3                                                       | <b>total</b>      | <b>total</b>  |
| <b>count</b>                                             | 15          | 15          | 15          | 15          | 15                                                         | 17                | 100.0         |

**Table S4.21: Effect of Proline C $\gamma$ -Puckering on Backbone  $\phi, \psi$  Dihedrals in Type I'  $\beta$ -Turns**

| Type I' $\beta$ -Turns                         | <i>i</i> +1 |             | <i>i</i> +2 |             | Proline Pucker                                    |                   |               |
|------------------------------------------------|-------------|-------------|-------------|-------------|---------------------------------------------------|-------------------|---------------|
|                                                | $\phi(i+1)$ | $\psi(i+1)$ | $\phi(i+2)$ | $\psi(i+2)$ | C $\alpha$ -C $\beta$ -C $\gamma$ -C $\delta$ (°) | endo/exo          |               |
| Boc-Dmaa-D-Pro-Acpc-Leu-NMe <sub>2</sub> (3c)  | 64.3        | 15.2        | 71.9        | 14.9        | -37.0                                             | endo              |               |
| Boc-Dmaa-D-Pro-Acpc-Leu-OMe (4a)               | 62.4        | 17.7        | 72.7        | 11.9        | -36.2                                             | endo              |               |
| Boc-Dmaa-D-Pro-Acpc-Leu-OMe (4b)               | 61.1        | 21.8        | 71.0        | 11.4        | -36.5                                             | endo              |               |
| Boc-Dmaa-D-Pro-Acpc-Leu-OMe (4c)               | 63.8        | 12.6        | 71.7        | 12.3        | -39.0                                             | endo              |               |
| Boc-Dmaa-D-Pro-Acpc-Leu-OMe (4d)               | 61.6        | 19.3        | 73.0        | 10.9        | -38.1                                             | endo              |               |
| Boc-Dmaa-D-Pro-Acpc-Leu-OMe (4e)               | 62.8        | 13.3        | 74.6        | 15.1        | -39.0                                             | endo              |               |
| Boc-Cys(Ph)-D-Pro-Acpc-Leu-OMe (5)             | 69.5        | 13.7        | 75.1        | 6.9         | 39.3                                              | exo               |               |
| Boc-Dmaa-D-Pro-Acpc-Gly-OMe (7b)               | 67.9        | 15.8        | 73.5        | 11.7        | 37.6                                              | exo               |               |
| Boc-Dmaa-D-Pro-Acpc-Val-OMe (10)               | 61.8        | 13.4        | 75.4        | 6.0         | -39.3                                             | endo              |               |
| Boc-Dmaa-D-Pro-Acbc-Leu-NMe <sub>2</sub> (16c) | 65.7        | 14.2        | 67.1        | 28.7        | -36.3                                             | endo              |               |
| Boc-Dmaa-D-Pro-Acbc-Leu-OMe (17a)              | 63.6        | 14.6        | 65.0        | 26.1        | -35.3                                             | endo              |               |
| Boc-Dmaa-D-Pro-Acbc-Leu-OMe (17b)              | 65.0        | 17.9        | 66.2        | 20.8        | 37.5                                              | exo               |               |
| Boc-Dmaa-D-Pro-Cle-Leu-OMe (18a)               | 67.8        | 18.0        | 63.6        | 20.9        | 38.6                                              | exo               |               |
| Boc-Dmaa-D-Pro-Cle-Leu-OMe (18b)               | 61.4        | 19.7        | 62.3        | 24.9        | -38.6                                             | endo              |               |
| Boc-Dmaa-D-Pro-Aic-Leu-OMe (19a)               | 71.2        | 17.1        | 59.3        | 37.1        | 37.0                                              | exo               |               |
| Boc-Dmaa-D-Pro-Aic-Leu-OMe (19b)               | 62.4        | 29.0        | 67.3        | 17.1        | -39.2                                             | endo              |               |
| Boc-Dmaa-D-Pro-Achc-Leu-OMe (22a)              | 61.3        | 16.7        | 56.1        | 30.7        | -34.7                                             | endo              |               |
| Boc-Dmaa-D-Pro-Achc-Leu-OMe (22b)              | 71.1        | 12.4        | 55.9        | 29.6        | 38.3                                              | exo               |               |
| Boc-Cys(Ph)-D-Pro-Achc-Leu-OMe (23)            | 77.6        | 0.8         | 65.4        | 12.3        | 41.9                                              | exo               |               |
| Boc-Dmaa-D-Pro-Gly-Leu-OMe (33a)               | 62.0        | 18.1        | 82.9        | 6.7         | -27.8                                             | endo              |               |
| Boc-Dmaa-D-Pro-Gly-Leu-OMe (33b)               | 66.7        | 14.8        | 81.1        | 4.1         | 38.8                                              | exo               |               |
| <b>average</b>                                 | 65.3        | 16.0        | 69.1        | 17.1        | -8.0                                              | <b>endo count</b> | <b>% endo</b> |
| <b>st. dev.</b>                                | 4.3         | 5.1         | 7.3         | 9.3         | 37.6                                              | 13                | 61.9          |
| <b>median</b>                                  | 63.8        | 15.8        | 71.0        | 14.9        | -35.3                                             | <b>exo count</b>  | <b>% exo</b>  |
| <b>minimum</b>                                 | 61.1        | 0.8         | 55.9        | 4.1         | -39.3                                             | 8                 | 38.1          |
| <b>maximum</b>                                 | 77.6        | 29.0        | 82.9        | 37.1        | 41.9                                              | <b>total</b>      | <b>total</b>  |
| <b>count</b>                                   | 21          | 21          | 21          | 21          | 21                                                | 21                | 100.0         |
| Type I' $\beta$ -Turns, <i>endo</i>            | <i>i</i> +1 |             | <i>i</i> +2 |             | Proline Pucker                                    |                   |               |
|                                                | $\phi(i+1)$ | $\psi(i+1)$ | $\phi(i+2)$ | $\psi(i+2)$ | C $\alpha$ -C $\beta$ -C $\gamma$ -C $\delta$ (°) | endo/exo          |               |
| Boc-Dmaa-D-Pro-Acpc-Leu-NMe <sub>2</sub> (3c)  | 64.3        | 15.2        | 71.9        | 14.9        | -37.0                                             | endo              |               |
| Boc-Dmaa-D-Pro-Acpc-Leu-OMe (4a)               | 62.4        | 17.7        | 72.7        | 11.9        | -36.2                                             | endo              |               |
| Boc-Dmaa-D-Pro-Acpc-Leu-OMe (4b)               | 61.1        | 21.8        | 71.0        | 11.4        | -36.5                                             | endo              |               |
| Boc-Dmaa-D-Pro-Acpc-Leu-OMe (4c)               | 63.8        | 12.6        | 71.7        | 12.3        | -39.0                                             | endo              |               |
| Boc-Dmaa-D-Pro-Acpc-Leu-OMe (4d)               | 61.6        | 19.3        | 73.0        | 10.9        | -38.1                                             | endo              |               |
| Boc-Dmaa-D-Pro-Acpc-Leu-OMe (4e)               | 62.8        | 13.3        | 74.6        | 15.1        | -39.0                                             | endo              |               |
| Boc-Dmaa-D-Pro-Acpc-Val-OMe (10)               | 61.8        | 13.4        | 75.4        | 6.0         | -39.3                                             | endo              |               |
| Boc-Dmaa-D-Pro-Acbc-Leu-NMe <sub>2</sub> (16c) | 65.7        | 14.2        | 67.1        | 28.7        | -36.3                                             | endo              |               |
| Boc-Dmaa-D-Pro-Acbc-Leu-OMe (17a)              | 63.6        | 14.6        | 65.0        | 26.1        | -35.3                                             | endo              |               |
| Boc-Dmaa-D-Pro-Cle-Leu-OMe (18b)               | 61.4        | 19.7        | 62.3        | 24.9        | -38.6                                             | endo              |               |
| Boc-Dmaa-D-Pro-Aic-Leu-OMe (19b)               | 62.4        | 29.0        | 67.3        | 17.1        | -39.2                                             | endo              |               |
| Boc-Dmaa-D-Pro-Achc-Leu-OMe (22a)              | 61.3        | 16.7        | 56.1        | 30.7        | -34.7                                             | endo              |               |
| Boc-Dmaa-D-Pro-Gly-Leu-OMe (33a)               | 62.0        | 18.1        | 82.9        | 6.7         | -27.8                                             | endo              |               |
| <b>average</b>                                 | 62.6        | 17.4        | 70.1        | 16.7        | -36.7                                             | <b>endo count</b> | <b>% endo</b> |
| <b>st. dev.</b>                                | 1.4         | 4.5         | 6.7         | 8.3         | 3.1                                               | 13                | 100.0         |
| <b>median</b>                                  | 62.4        | 16.7        | 71.7        | 14.9        | -37.0                                             | <b>exo count</b>  | <b>% exo</b>  |
| <b>minimum</b>                                 | 61.1        | 12.6        | 56.1        | 6.0         | -39.3                                             | 0                 | 0.0           |
| <b>maximum</b>                                 | 65.7        | 29.0        | 82.9        | 30.7        | -27.8                                             | <b>total</b>      | <b>total</b>  |
| <b>count</b>                                   | 13          | 13          | 13          | 13          | 13                                                | 13                | 100.0         |
| Type I' $\beta$ -Turns, <i>exo</i>             | <i>i</i> +1 |             | <i>i</i> +2 |             | Proline Pucker                                    |                   |               |
|                                                | $\phi(i+1)$ | $\psi(i+1)$ | $\phi(i+2)$ | $\psi(i+2)$ | C $\alpha$ -C $\beta$ -C $\gamma$ -C $\delta$ (°) | endo/exo          |               |
| Boc-Cys(Ph)-D-Pro-Acpc-Leu-OMe (5)             | 69.5        | 13.7        | 75.1        | 6.9         | 39.3                                              | exo               |               |
| Boc-Dmaa-D-Pro-Acpc-Gly-OMe (7b)               | 67.9        | 15.8        | 73.5        | 11.7        | 37.6                                              | exo               |               |
| Boc-Dmaa-D-Pro-Acbc-Leu-OMe (17b)              | 65.0        | 17.9        | 66.2        | 20.8        | 37.5                                              | exo               |               |
| Boc-Dmaa-D-Pro-Cle-Leu-OMe (18a)               | 67.8        | 18.0        | 63.6        | 20.9        | 38.6                                              | exo               |               |
| Boc-Dmaa-D-Pro-Aic-Leu-OMe (19a)               | 71.2        | 17.1        | 59.3        | 37.1        | 37.0                                              | exo               |               |
| Boc-Dmaa-D-Pro-Achc-Leu-OMe (22b)              | 71.1        | 12.4        | 55.9        | 29.6        | 38.3                                              | exo               |               |
| Boc-Cys(Ph)-D-Pro-Achc-Leu-OMe (23)            | 77.6        | 0.8         | 65.4        | 12.3        | 41.9                                              | exo               |               |
| Boc-Dmaa-D-Pro-Gly-Leu-OMe (33b)               | 66.7        | 14.8        | 81.1        | 4.1         | 38.8                                              | exo               |               |
| <b>average</b>                                 | 69.6        | 13.8        | 67.5        | 17.9        | 38.6                                              | <b>endo count</b> | <b>% endo</b> |
| <b>st. dev.</b>                                | 3.9         | 5.6         | 8.5         | 11.4        | 1.5                                               | 0                 | 0.0           |
| <b>median</b>                                  | 68.7        | 15.3        | 65.8        | 16.6        | 38.5                                              | <b>exo count</b>  | <b>% exo</b>  |
| <b>minimum</b>                                 | 65.0        | 0.8         | 55.9        | 4.1         | 37.0                                              | 8                 | 100.0         |
| <b>maximum</b>                                 | 77.6        | 18.0        | 81.1        | 37.1        | 41.9                                              | <b>total</b>      | <b>total</b>  |
| <b>count</b>                                   | 8           | 8           | 8           | 8           | 8                                                 | 8                 | 100.0         |

**Table S4.22: Effect of Proline C $\gamma$ -Puckering on Backbone  $\phi, \psi$  Dihedrals in Type II  $\beta$ -Turns**

| Type II $\beta$ -Turns                           | <i>i</i> +1 |             | <i>i</i> +2 |             | Proline Pucker                                                            |                   |               |
|--------------------------------------------------|-------------|-------------|-------------|-------------|---------------------------------------------------------------------------|-------------------|---------------|
|                                                  | $\phi(i+1)$ | $\psi(i+1)$ | $\phi(i+2)$ | $\psi(i+2)$ | $\text{C}\alpha\text{-C}\beta\text{-C}\gamma\text{-C}\delta$ ( $^\circ$ ) | endo/exo          |               |
| Boc-Dmaa-Pro-Acpc-Leu-OMe (15)                   | -51.0       | 132.3       | 76.8        | -0.1        | 40.0                                                                      | exo               |               |
| Boc-Dmaa-Pro-Aic-Leu-OMe (21a)                   | -51.3       | 137.4       | 62.5        | 26.8        | 37.4                                                                      | exo               |               |
| Boc-Dmaa-Pro-Aic-Leu-OMe (21b)                   | -54.3       | 140.0       | 61.6        | 28.6        | 37.3                                                                      | exo               |               |
| Boc-Dmaa-Pro-Aib-Leu-OMe (30)                    | -52.0       | 138.0       | 63.5        | 22.9        | 36.8                                                                      | exo               |               |
| Boc-Phe-Pro-Aib-( <i>R</i> )- $\alpha$ -Mba (35) | -51.3       | 127.9       | 61.6        | 24.8        | 36.7                                                                      | exo               |               |
| 2-Msa-Pro-D-Val-( <i>R</i> )- $\alpha$ -Mba (36) | -60.6       | 139.1       | 79.8        | 3.6         | -35.0                                                                     | endo              |               |
| <b>average</b>                                   | -53.4       | 135.8       | 67.6        | 17.8        | 25.5                                                                      | <b>endo count</b> | <b>% endo</b> |
| <b>st. dev.</b>                                  | 3.7         | 4.7         | 8.3         | 12.6        | 29.7                                                                      | 1                 | 16.7          |
| <b>median</b>                                    | -51.7       | 137.7       | 63.0        | 23.9        | 37.1                                                                      | <b>exo count</b>  | <b>% exo</b>  |
| <b>minimum</b>                                   | -60.6       | 127.9       | 61.6        | -0.1        | -35.0                                                                     | 5                 | 83.3          |
| <b>maximum</b>                                   | -51.0       | 140.0       | 79.8        | 28.6        | 40.0                                                                      | <b>total</b>      | <b>total</b>  |
| <b>count</b>                                     | 6           | 6           | 6           | 6           | 6                                                                         | 6                 | 100.0         |

  

| Type II $\beta$ -Turns                           | <i>i</i> +1 |             | <i>i</i> +2 |             | Proline Pucker                                                            |                   |               |
|--------------------------------------------------|-------------|-------------|-------------|-------------|---------------------------------------------------------------------------|-------------------|---------------|
|                                                  | $\phi(i+1)$ | $\psi(i+1)$ | $\phi(i+2)$ | $\psi(i+2)$ | $\text{C}\alpha\text{-C}\beta\text{-C}\gamma\text{-C}\delta$ ( $^\circ$ ) | endo/exo          |               |
| Boc-Dmaa-Pro-Acpc-Leu-OMe (15)                   | -51.0       | 132.3       | 76.8        | -0.1        | 40.0                                                                      | exo               |               |
| Boc-Dmaa-Pro-Aic-Leu-OMe (21a)                   | -51.3       | 137.4       | 62.5        | 26.8        | 37.4                                                                      | exo               |               |
| Boc-Dmaa-Pro-Aic-Leu-OMe (21b)                   | -54.3       | 140.0       | 61.6        | 28.6        | 37.3                                                                      | exo               |               |
| Boc-Dmaa-Pro-Aib-Leu-OMe (30)                    | -52.0       | 138.0       | 63.5        | 22.9        | 36.8                                                                      | exo               |               |
| Boc-Phe-Pro-Aib-( <i>R</i> )- $\alpha$ -Mba (35) | -51.3       | 127.9       | 61.6        | 24.8        | 36.7                                                                      | exo               |               |
| <b>average</b>                                   | -52.0       | 135.1       | 65.2        | 20.6        | 37.6                                                                      | <b>endo count</b> | <b>% endo</b> |
| <b>st. dev.</b>                                  | 1.3         | 4.9         | 6.5         | 11.8        | 1.4                                                                       | 0                 | 0.0           |
| <b>median</b>                                    | -51.3       | 137.4       | 62.5        | 24.8        | 37.3                                                                      | <b>exo count</b>  | <b>% exo</b>  |
| <b>minimum</b>                                   | -54.3       | 127.9       | 61.6        | -0.1        | 36.7                                                                      | 5                 | 100.0         |
| <b>maximum</b>                                   | -51.0       | 140.0       | 76.8        | 28.6        | 40.0                                                                      | <b>total</b>      | <b>total</b>  |
| <b>count</b>                                     | 5           | 5           | 5           | 5           | 5                                                                         | 5                 | 100.0         |

**Table S4.23: Summary of Proline C $\gamma$ -Puckering Across Canonical  $\beta$ -Turn Types**

| all peptides |       | type II' |       | type I' |       | type II |       | type I |       |
|--------------|-------|----------|-------|---------|-------|---------|-------|--------|-------|
| % endo       | % exo | % endo   | % exo | % endo  | % exo | % endo  | % exo | % endo | % exo |
| 41.5         | 58.5  | 34.8     | 65.2  | 61.9    | 38.1  | 83.3    | 16.7  | 0.0    | 100.0 |

**Table S4.24: Summary of the Effect of Proline C $\gamma$ -Puckering on Backbone  $\phi, \psi$  Dihedrals**

|                    | type II'                 |                           |                          |                           |
|--------------------|--------------------------|---------------------------|--------------------------|---------------------------|
|                    | $\phi(i+1)$              | $\psi(i+1)$               | $\phi(i+2)$              | $\psi(i+2)$               |
| <b>average</b>     | 60.5 $\pm$ 5.0 $^\circ$  | -129.9 $\pm$ 6.3 $^\circ$ | -69.9 $\pm$ 9.1 $^\circ$ | -11.7 $\pm$ 12.0 $^\circ$ |
| <b>endo pucker</b> | 57.9 $\pm$ 6.2 $^\circ$  | -126.7 $\pm$ 8.4 $^\circ$ | -67.4 $\pm$ 8.1 $^\circ$ | -14.6 $\pm$ 8.2 $^\circ$  |
| <b>exo pucker</b>  | 62.0 $\pm$ 3.8 $^\circ$  | -131.7 $\pm$ 4.3 $^\circ$ | -71.3 $\pm$ 9.6 $^\circ$ | -10.2 $\pm$ 13.6 $^\circ$ |
|                    | type I'                  |                           |                          |                           |
|                    | $\phi(i+1)$              | $\psi(i+1)$               | $\phi(i+2)$              | $\psi(i+2)$               |
| <b>average</b>     | 65.3 $\pm$ 4.3 $^\circ$  | 16.0 $\pm$ 5.1 $^\circ$   | -69.1 $\pm$ 7.3 $^\circ$ | 17.1 $\pm$ 9.3 $^\circ$   |
| <b>endo pucker</b> | 62.6 $\pm$ 1.4 $^\circ$  | 17.4 $\pm$ 4.5 $^\circ$   | 70.1 $\pm$ 6.7 $^\circ$  | 16.7 $\pm$ 8.3 $^\circ$   |
| <b>exo pucker</b>  | 69.6 $\pm$ 3.8 $^\circ$  | 13.8 $\pm$ 5.6 $^\circ$   | 67.5 $\pm$ 8.5 $^\circ$  | 17.9 $\pm$ 11.4 $^\circ$  |
|                    | type II                  |                           |                          |                           |
|                    | $\phi(i+1)$              | $\psi(i+1)$               | $\phi(i+2)$              | $\psi(i+2)$               |
| <b>average</b>     | -53.4 $\pm$ 3.7 $^\circ$ | 135.8 $\pm$ 4.7 $^\circ$  | 67.6 $\pm$ 8.3 $^\circ$  | 17.8 $\pm$ 12.6 $^\circ$  |
| <b>endo pucker</b> | -60.6 $^\circ$           | 139.1 $^\circ$            | 79.8 $^\circ$            | 3.6 $^\circ$              |
| <b>exo pucker</b>  | -52.0 $\pm$ 1.3 $^\circ$ | 135.1 $\pm$ 4.9 $^\circ$  | 65.2 $\pm$ 6.5 $^\circ$  | 20.6 $\pm$ 11.7 $^\circ$  |

**Table S4.25: Main-Chain Angles ( $\tau$ )<sup>22</sup>**

| Peptide Sequence                                                       | $\tau(i)$ (°) | $\tau(i+1)$ (°) | $\tau(i+2)$ (°) | $\tau(i+3)$ (°) |
|------------------------------------------------------------------------|---------------|-----------------|-----------------|-----------------|
| Boc-Dmaa-D-Pro-Acpc-Leu-NMe <sub>2</sub> ( <b>3a</b> )                 | 109.4         | 111.9           | 118.1           | 108.0           |
| Boc-Dmaa-D-Pro-Acpc-Leu-NMe <sub>2</sub> ( <b>3b</b> )                 | 108.2         | 110.0           | 116.5           | 111.0           |
| Boc-Dmaa-D-Pro-Acpc-Leu-NMe <sub>2</sub> ( <b>3c</b> )                 | 110.3         | 114.3           | 117.4           | 110.5           |
| Boc-Dmaa-D-Pro-Acpc-Leu-OMe ( <b>4a</b> )                              | 110.1         | 114.6           | 117.0           | 112.2           |
| Boc-Dmaa-D-Pro-Acpc-Leu-OMe ( <b>4b</b> )                              | 109.6         | 114.3           | 117.7           | 112.6           |
| Boc-Dmaa-D-Pro-Acpc-Leu-OMe ( <b>4c</b> )                              | 111.0         | 115.1           | 117.0           | 111.7           |
| Boc-Dmaa-D-Pro-Acpc-Leu-OMe ( <b>4d</b> )                              | 109.4         | 113.6           | 117.3           | 112.7           |
| Boc-Dmaa-D-Pro-Acpc-Leu-OMe ( <b>4e</b> )                              | 110.8         | 115.0           | 118.0           | 110.4           |
| Boc-Cys(Ph)-D-Pro-Acpc-Leu-OMe ( <b>5</b> )                            | 109.3         | 113.4           | 116.5           | 110.7           |
| Boc-Leu-D-Pro-Acpc-Leu-OMe ( <b>6</b> )                                | 108.7         | 110.8           | 117.0           | 110.0           |
| Boc-Dmaa-D-Pro-Acpc-Gly-OMe ( <b>7a</b> )                              | 110.9         | 108.9           | 117.0           | 112.7           |
| Boc-Dmaa-D-Pro-Acpc-Gly-OMe ( <b>7b</b> )                              | 111.1         | 113.4           | 115.7           | 114.6           |
| Boc-Dmaa-D-Pro-Acpc-Nle-NMe <sub>2</sub> ( <b>8</b> )                  | 107.0         | 109.4           | 117.4           | 109.8           |
| Boc-Dmaa-D-Pro-Acpc-Val-NMe <sub>2</sub> ( <b>9</b> )                  | 106.8         | 109.3           | 117.7           | 109.1           |
| Boc-Dmaa-D-Pro-Acpc-Val-OMe ( <b>10</b> )                              | 109.8         | 114.8           | 117.2           | 111.5           |
| Boc-Dmaa-D-Pro-Acpc-Chg-NMe <sub>2</sub> ( <b>11</b> )                 | 107.0         | 109.3           | 117.4           | 109.3           |
| Boc-Dmaa-D-Pro-Acpc-Phe-NMe <sub>2</sub> ( <b>12</b> )                 | 108.2         | 110.1           | 116.9           | 110.1           |
| Boc-Dmaa-D-Pro-Acpc-Phe-OMe ( <b>13</b> )                              | 110.7         | 109.9           | 116.9           | 108.8           |
| Boc-Dmaa-D-Pro-Acpc-D-Phe-NMe <sub>2</sub> ( <b>14</b> )               | 108.9         | 109.6           | 117.7           | 106.9           |
| Boc-Dmaa-Pro-Acpc-Leu-OMe ( <b>15</b> )                                | 109.8         | 109.9           | 117.8           | 107.3           |
| Boc-Dmaa-D-Pro-Acbc-Leu-NMe <sub>2</sub> ( <b>16a</b> )                | 108.1         | 107.9           | 111.8           | 110.4           |
| Boc-Dmaa-D-Pro-Acbc-Leu-NMe <sub>2</sub> ( <b>16b</b> )                | 113.4         | 109.9           | 114.4           | 108.5           |
| Boc-Dmaa-D-Pro-Acbc-Leu-NMe <sub>2</sub> ( <b>16c</b> )                | 110.1         | 115.4           | 112.5           | 110.5           |
| Boc-Dmaa-D-Pro-Acbc-Leu-OMe ( <b>17a</b> )                             | 110.8         | 115.8           | 112.3           | 110.9           |
| Boc-Dmaa-D-Pro-Acbc-Leu-OMe ( <b>17b</b> )                             | 110.8         | 115.3           | 112.3           | 110.9           |
| Boc-Dmaa-D-Pro-Cle-Leu-OMe ( <b>18a</b> )                              | 111.0         | 114.8           | 111.7           | 110.2           |
| Boc-Dmaa-D-Pro-Cle-Leu-OMe ( <b>18b</b> )                              | 110.8         | 116.4           | 111.3           | 110.3           |
| Boc-Dmaa-D-Pro-Aic-Leu-OMe ( <b>19a</b> )                              | 111.4         | 114.6           | 110.6           | 111.6           |
| Boc-Dmaa-D-Pro-Aic-Leu-OMe ( <b>19b</b> )                              | 113.5         | 114.5           | 112.6           | 110.0           |
| Boc-Dmaa-D-Pro-Aic-D-Phe-NMe <sub>2</sub> ( <b>20a</b> )               | 107.3         | 110.6           | 112.2           | 109.9           |
| Boc-Dmaa-D-Pro-Aic-D-Phe-NMe <sub>2</sub> ( <b>20b</b> )               | 107.5         | 111.6           | 112.4           | 108.5           |
| Boc-Dmaa-Pro-Aic-Leu-OMe ( <b>21a</b> )                                | 108.5         | 109.5           | 112.2           | 108.7           |
| Boc-Dmaa-Pro-Aic-Leu-OMe ( <b>21b</b> )                                | 107.3         | 109.7           | 111.8           | 108.6           |
| Boc-Dmaa-D-Pro-Achc-Leu-OMe ( <b>22a</b> )                             | 111.9         | 117.4           | 110.8           | 109.4           |
| Boc-Dmaa-D-Pro-Achc-Leu-OMe ( <b>22b</b> )                             | 112.0         | 115.2           | 109.8           | 110.0           |
| Boc-Cys(Ph)-D-Pro-Achc-Leu-OMe ( <b>23</b> )                           | 110.3         | 115.2           | 110.2           | 111.0           |
| Boc-Dmaa-D-Pro-Aib-Leu-NMe <sub>2</sub> ( <b>24</b> )                  | 109.7         | 111.0           | 112.0           | 109.6           |
| Boc-Dmaa-D-Pro-Aib-Leu-OMe ( <b>25</b> )                               | 109.6         | 110.1           | 111.7           | 107.8           |
| Boc-Dmaa-D-Pro-Aib-Val-OMe ( <b>26</b> )                               | 105.9         | 109.8           | 112.0           | 110.1           |
| Boc-Dmaa-D-Pro-Aib-Phe-OMe ( <b>27</b> )                               | 107.0         | 111.4           | 111.0           | 110.1           |
| Boc-Dmaa-D-Pro-Aib-3-Pal-NMe <sub>2</sub> ( <b>28</b> )                | 108.5         | 111.3           | 112.3           | 108.2           |
| Boc-Dmaa-D-Pro-Aib-2-Thi-NMe <sub>2</sub> ( <b>29a</b> )               | 108.4         | 111.1           | 110.9           | 110.9           |
| Boc-Dmaa-D-Pro-Aib-2-Thi-NMe <sub>2</sub> ( <b>29b</b> )               | 108.0         | 110.2           | 111.6           | 111.1           |
| Boc-Dmaa-Pro-Aib-Leu-OMe ( <b>30</b> )                                 | 108.0         | 109.1           | 111.8           | 109.0           |
| Boc-Dmaa-D-Pro-Ala-Phe-OMe ( <b>31</b> )                               | 110.6         | 109.3           | 111.8           | 108.6           |
| Boc-Dmaa-D-Pro-Phe-Leu-NMe <sub>2</sub> ( <b>32a</b> )                 | 109.0         | 110.2           | 107.2           | 109.8           |
| Boc-Dmaa-D-Pro-Phe-Leu-NMe <sub>2</sub> ( <b>32b</b> )                 | 107.0         | 111.4           | 109.5           | 110.8           |
| Boc-Dmaa-D-Pro-Gly-Leu-OMe ( <b>33a</b> )                              | 111.1         | 115.5           | 115.6           | 115.3           |
| Boc-Dmaa-D-Pro-Gly-Leu-OMe ( <b>33b</b> )                              | 109.9         | 113.8           | 115.4           | 113.9           |
| Boc-Keto-D-Pro-Aib-Phe-OMe ( <b>34</b> )                               | 110.3         | 110.6           | 111.1           | 109.5           |
| Boc-Phe-Pro-Aib-( <i>R</i> )- $\alpha$ -Mba ( <b>35</b> )              | 108.9         | 112.3           | 112.3           | N/A             |
| 2-Msa-Pro-D-Val-( <i>R</i> )- $\alpha$ -Mba ( <b>36</b> )              | N/A           | 109.7           | 113.1           | N/A             |
| Boc-His( $\tau$ -Bn)-Pro-Aib-( <i>R</i> )- $\alpha$ -Mba ( <b>37</b> ) | 109.4         | 116.0           | 112.6           | 113.9           |
| <b>average</b>                                                         | 109.5         | 112.2           | 113.9           | 110.4           |
| <b>st. dev.</b>                                                        | 1.7           | 2.5             | 2.9             | 1.8             |
| <b>median</b>                                                          | 109.6         | 111.4           | 112.5           | 110.1           |
| <b>minimum</b>                                                         | 105.9         | 107.9           | 107.2           | 106.9           |
| <b>maximum</b>                                                         | 113.5         | 117.4           | 118.1           | 115.3           |
| <b>count</b>                                                           | 52            | 53              | 53              | 51              |

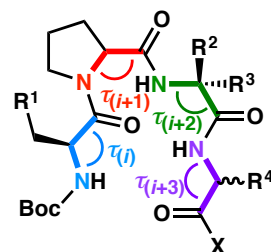

**Table S4.26:** Positional Distribution of Main-Chain Angles ( $\tau$ )<sup>22</sup>

| Bin             | $\tau$ (°)<br>Count | $\tau(i)$ (°)<br>Count | $\tau(i+1)$ (°)<br>Count | $\tau(i+2)$ (°)<br>Count | $\tau(i+3)$ (°)<br>Count |
|-----------------|---------------------|------------------------|--------------------------|--------------------------|--------------------------|
| 100-102         | 0                   | 0                      | 0                        | 0                        | 0                        |
| 103-104         | 0                   | 0                      | 0                        | 0                        | 0                        |
| 105-106         | 3                   | 2                      | 0                        | 0                        | 1                        |
| 107-108         | 31                  | 18                     | 2                        | 1                        | 10                       |
| 109-110         | 76                  | 23                     | 21                       | 6                        | 26                       |
| 111-112         | 47                  | 7                      | 8                        | 22                       | 10                       |
| 113-114         | 17                  | 2                      | 11                       | 2                        | 2                        |
| 115-116         | 18                  | 0                      | 10                       | 7                        | 1                        |
| 117-118         | 16                  | 0                      | 1                        | 15                       | 0                        |
| 119-120         | 0                   | 0                      | 0                        | 0                        | 0                        |
| <b>sum</b>      | 208                 | 52                     | 53                       | 53                       | 50                       |
| <b>average</b>  | 111.5               | 109.5                  | 112.2                    | 113.9                    | 110.3                    |
| <b>st. dev.</b> | 2.8                 | 1.7                    | 2.5                      | 2.9                      | 1.7                      |
| <b>median</b>   | 110.8               | 109.6                  | 111.4                    | 112.5                    | 110.1                    |
| <b>minimum</b>  | 105.9               | 105.9                  | 107.9                    | 107.2                    | 106.9                    |
| <b>maximum</b>  | 118.1               | 113.5                  | 117.4                    | 118.1                    | 115.3                    |
| <b>count</b>    | 208                 | 52                     | 53                       | 53                       | 50                       |

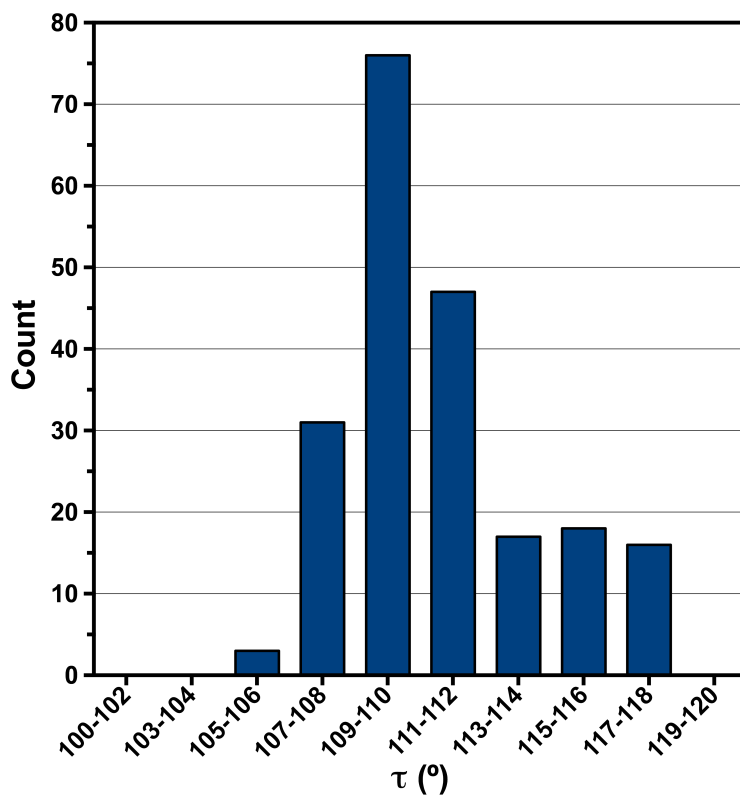

**Figure S4.08:** Histogram showing the distribution of  $\tau$  angles across all peptides.

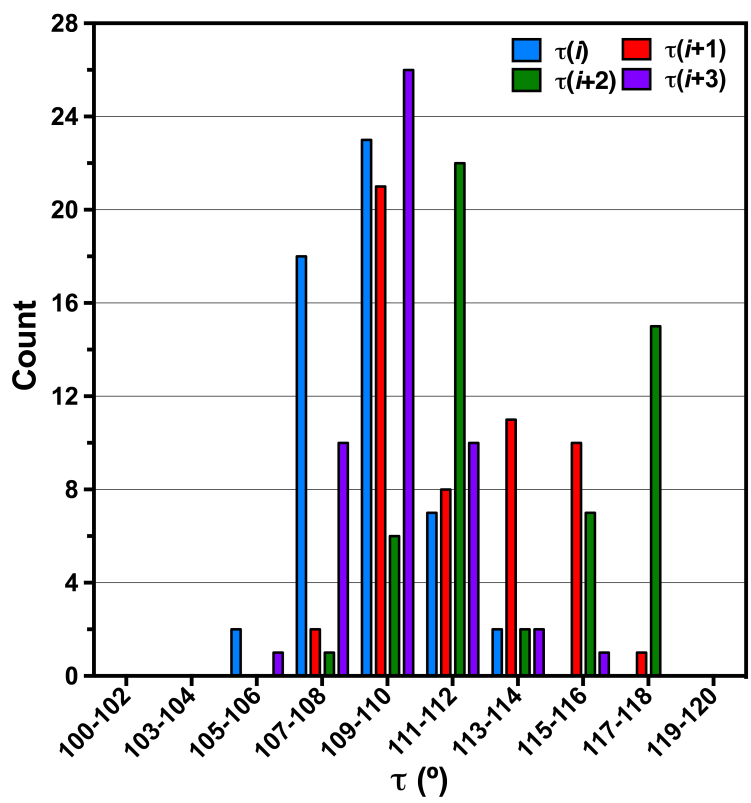

**Figure S4.09:** Histogram showing the positional distribution of  $\tau$  angles across all peptides.

**Table S4.27: Main-Chain Angles ( $\tau$ ) in Types II/II'  $\beta$ -Turns**

| Type II/II' $\beta$ -Turns                                | $\tau(i)$ ( $^\circ$ ) | $\tau(i+1)$ ( $^\circ$ ) | $\tau(i+2)$ ( $^\circ$ ) | $\tau(i+3)$ ( $^\circ$ ) |                        |
|-----------------------------------------------------------|------------------------|--------------------------|--------------------------|--------------------------|------------------------|
| Boc-Dmaa-D-Pro-Acpc-Leu-NMe <sub>2</sub> ( <b>3a</b> )    | 109.4                  | 111.9                    | 118.1                    | 108.0                    |                        |
| Boc-Dmaa-D-Pro-Acpc-Leu-NMe <sub>2</sub> ( <b>3b</b> )    | 108.2                  | 110.0                    | 116.5                    | 111.0                    |                        |
| Boc-Leu-D-Pro-Acpc-Leu-OMe ( <b>6</b> )                   | 108.7                  | 110.8                    | 117.0                    | 110.0                    |                        |
| Boc-Dmaa-D-Pro-Acpc-Gly-OMe ( <b>7a</b> )                 | 110.9                  | 108.9                    | 117.0                    | 112.7                    |                        |
| Boc-Dmaa-D-Pro-Acpc-Nle-NMe <sub>2</sub> ( <b>8</b> )     | 107.0                  | 109.4                    | 117.4                    | 109.8                    |                        |
| Boc-Dmaa-D-Pro-Acpc-Val-NMe <sub>2</sub> ( <b>9</b> )     | 108.2                  | 110.1                    | 116.9                    | 110.1                    |                        |
| Boc-Dmaa-D-Pro-Acpc-Chg-NMe <sub>2</sub> ( <b>11</b> )    | 107.0                  | 109.3                    | 117.4                    | 109.3                    |                        |
| Boc-Dmaa-D-Pro-Acpc-Phe-NMe <sub>2</sub> ( <b>12</b> )    | 108.2                  | 110.1                    | 116.9                    | 110.1                    |                        |
| Boc-Dmaa-D-Pro-Acpc-Phe-OMe ( <b>13</b> )                 | 110.7                  | 109.9                    | 116.9                    | 108.8                    |                        |
| Boc-Dmaa-D-Pro-Acpc-D-Phe-NMe <sub>2</sub> ( <b>14</b> )  | 108.9                  | 109.6                    | 117.7                    | 106.9                    |                        |
| Boc-Dmaa-Pro-Acpc-Leu-OMe ( <b>15</b> )                   | 109.8                  | 109.9                    | 117.8                    | 107.3                    |                        |
| Boc-Dmaa-D-Pro-Acpc-Leu-NMe <sub>2</sub> ( <b>16a</b> )   | 108.1                  | 107.9                    | 111.8                    | 110.4                    |                        |
| Boc-Dmaa-D-Pro-Acpc-Leu-NMe <sub>2</sub> ( <b>16b</b> )   | 113.4                  | 109.9                    | 114.4                    | 108.5                    |                        |
| Boc-Dmaa-D-Pro-Aic-D-Phe-NMe <sub>2</sub> ( <b>20a</b> )  | 107.3                  | 110.6                    | 112.2                    | 109.9                    |                        |
| Boc-Dmaa-D-Pro-Aic-D-Phe-NMe <sub>2</sub> ( <b>20b</b> )  | 107.5                  | 111.6                    | 112.4                    | 108.5                    |                        |
| Boc-Dmaa-Pro-Aic-Leu-OMe ( <b>21a</b> )                   | 108.5                  | 109.5                    | 112.2                    | 108.7                    |                        |
| Boc-Dmaa-Pro-Aic-Leu-OMe ( <b>21b</b> )                   | 107.3                  | 109.7                    | 111.8                    | 108.6                    |                        |
| Boc-Dmaa-D-Pro-Aib-Leu-NMe <sub>2</sub> ( <b>24</b> )     | 109.7                  | 111.0                    | 112.0                    | 109.6                    |                        |
| Boc-Dmaa-D-Pro-Aib-Leu-OMe ( <b>25</b> )                  | 109.6                  | 110.1                    | 111.7                    | 107.8                    |                        |
| Boc-Dmaa-D-Pro-Aib-Val-OMe ( <b>26</b> )                  | 108.0                  | 110.2                    | 111.6                    | 111.1                    |                        |
| Boc-Dmaa-D-Pro-Aib-Phe-OMe ( <b>27</b> )                  | 107.0                  | 111.4                    | 111.0                    | 110.1                    |                        |
| Boc-Dmaa-D-Pro-Aib-3-Pal-NMe <sub>2</sub> ( <b>28</b> )   | 108.5                  | 111.3                    | 112.3                    | 108.2                    |                        |
| Boc-Dmaa-D-Pro-Aib-2-Thi-NMe <sub>2</sub> ( <b>29a</b> )  | 108.4                  | 111.1                    | 110.9                    | 110.9                    |                        |
| Boc-Dmaa-D-Pro-Aib-2-Thi-NMe <sub>2</sub> ( <b>29b</b> )  | 108.0                  | 110.2                    | 111.6                    | 111.1                    |                        |
| Boc-Dmaa-Pro-Aib-Leu-OMe ( <b>30</b> )                    | 108.0                  | 109.1                    | 111.8                    | 109.0                    |                        |
| Boc-Dmaa-D-Pro-Ala-Phe-OMe ( <b>31</b> )                  | 110.6                  | 109.3                    | 111.8                    | 108.6                    |                        |
| Boc-Keto-D-Pro-Aib-Phe-OMe ( <b>34</b> )                  | 110.3                  | 110.6                    | 111.1                    | 109.5                    |                        |
| Boc-Phe-Pro-Aib-( <i>R</i> )- $\alpha$ -Mba ( <b>35</b> ) | 108.9                  | 112.3                    | 112.3                    | N/A                      |                        |
| 2-Msa-Pro-D-Val-( <i>R</i> )- $\alpha$ -Mba ( <b>36</b> ) | N/A                    | 109.7                    | 113.1                    | N/A                      | <b>All Type II/II'</b> |
| <b>average</b>                                            | 108.8                  | 110.2                    | 114.0                    | 109.4                    | 110.6                  |
| <b>st. dev.</b>                                           | 1.5                    | 1.0                      | 2.7                      | 1.3                      | 2.7                    |
| <b>median</b>                                             | 108.5                  | 110.1                    | 112.3                    | 109.5                    | 110.1                  |
| <b>minimum</b>                                            | 107.0                  | 107.9                    | 110.9                    | 106.9                    | 106.9                  |
| <b>maximum</b>                                            | 113.4                  | 112.3                    | 118.1                    | 112.7                    | 118.1                  |
| <b>count</b>                                              | 28                     | 29                       | 29                       | 27                       | 113.0                  |

**Table S4.28: Positional Distribution of Main-Chain Angles ( $\tau$ ) in Types II/II'  $\beta$ -Turns**

| bin             | $\tau(i)$ ( $^\circ$ )<br>Count | $\tau(i+1)$ ( $^\circ$ )<br>Count | $\tau(i+2)$ ( $^\circ$ )<br>Count | $\tau(i+3)$ ( $^\circ$ )<br>Count |
|-----------------|---------------------------------|-----------------------------------|-----------------------------------|-----------------------------------|
| 100-102         | 0                               | 0                                 | 0                                 | 0                                 |
| 103-104         | 0                               | 0                                 | 0                                 | 0                                 |
| 105-106         | 0                               | 0                                 | 0                                 | 1                                 |
| 107-108         | 19                              | 2                                 | 0                                 | 10                                |
| 109-110         | 8                               | 20                                | 1                                 | 12                                |
| 111-112         | 0                               | 7                                 | 15                                | 4                                 |
| 113-114         | 1                               | 0                                 | 2                                 | 0                                 |
| 115-116         | 0                               | 0                                 | 4                                 | 0                                 |
| 117-118         | 0                               | 0                                 | 7                                 | 0                                 |
| 119-120         | 0                               | 0                                 | 0                                 | 0                                 |
| <b>sum</b>      | 28                              | 29                                | 29                                | 27                                |
| <b>average</b>  | 108.7                           | 110.1                             | 114.0                             | 109.4                             |
| <b>st. dev.</b> | 1.6                             | 1.0                               | 2.7                               | 1.3                               |
| <b>median</b>   | 108.5                           | 109.9                             | 112.3                             | 109.3                             |
| <b>minimum</b>  | 105.9                           | 107.9                             | 110.9                             | 106.9                             |
| <b>maximum</b>  | 113.4                           | 112.3                             | 118.1                             | 112.7                             |
| <b>count</b>    | 28                              | 29                                | 29                                | 27                                |

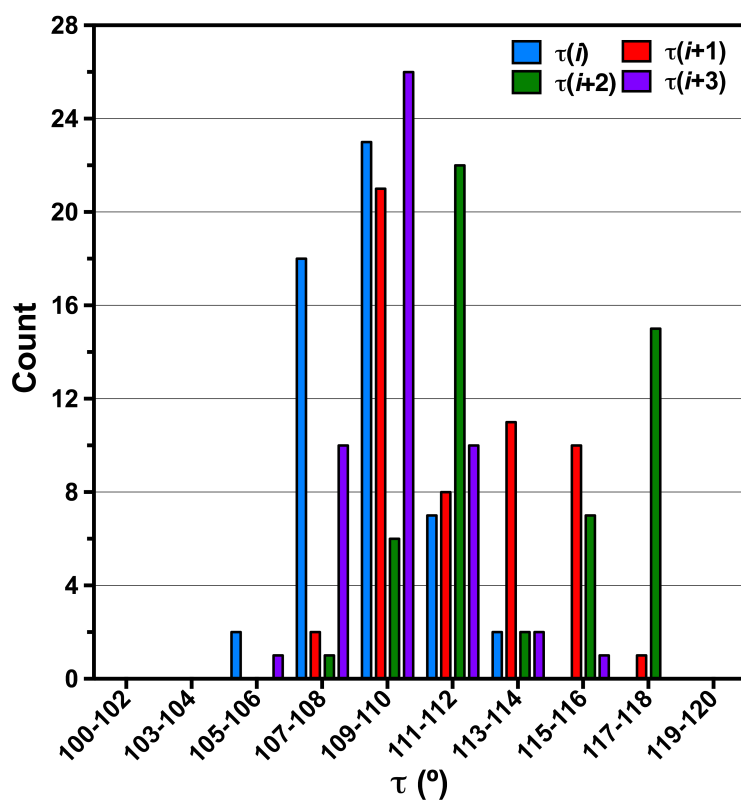

**Figure S4.10:** Histogram showing the distribution of  $\tau$  angles in type II/II'  $\beta$ -turns (reproduced from Figure 11h in the manuscript).



**Table S4.29:** Main-Chain Angles ( $\tau$ ) in Types I/I'  $\beta$ -Turns

| Type I/I' $\beta$ -Turns                                 | $\tau(i)$ ( $^\circ$ ) | $\tau(i+1)$ ( $^\circ$ ) | $\tau(i+2)$ ( $^\circ$ ) | $\tau(i+3)$ ( $^\circ$ ) |                    |
|----------------------------------------------------------|------------------------|--------------------------|--------------------------|--------------------------|--------------------|
| Boc-Dmaa-D-Pro-Acpc-Leu-NMe <sub>2</sub> ( <b>3c</b> )   | 110.3                  | 114.3                    | 117.4                    | 110.5                    |                    |
| Boc-Dmaa-D-Pro-Acpc-Leu-OMe ( <b>4a</b> )                | 110.1                  | 114.6                    | 117.0                    | 112.2                    |                    |
| Boc-Dmaa-D-Pro-Acpc-Leu-OMe ( <b>4b</b> )                | 109.6                  | 114.3                    | 117.7                    | 112.6                    |                    |
| Boc-Dmaa-D-Pro-Acpc-Leu-OMe ( <b>4c</b> )                | 111.0                  | 115.1                    | 117.0                    | 111.7                    |                    |
| Boc-Dmaa-D-Pro-Acpc-Leu-OMe ( <b>4d</b> )                | 109.4                  | 113.6                    | 117.3                    | 112.7                    |                    |
| Boc-Dmaa-D-Pro-Acpc-Leu-OMe ( <b>4e</b> )                | 110.8                  | 115.0                    | 118.0                    | 110.4                    |                    |
| Boc-Cys(Ph)-D-Pro-Acpc-Leu-OMe ( <b>5</b> )              | 109.3                  | 113.4                    | 116.5                    | 110.7                    |                    |
| Boc-Dmaa-D-Pro-Acpc-Gly-OMe ( <b>7b</b> )                | 111.1                  | 113.4                    | 115.7                    | 114.6                    |                    |
| Boc-Dmaa-D-Pro-Acpc-Val-OMe ( <b>10</b> )                | 109.8                  | 114.8                    | 117.2                    | 111.5                    |                    |
| Boc-Dmaa-D-Pro-Acbc-Leu-NMe <sub>2</sub> ( <b>16c</b> )  | 110.1                  | 115.4                    | 112.5                    | 110.5                    |                    |
| Boc-Dmaa-D-Pro-Acbc-Leu-OMe ( <b>17a</b> )               | 110.8                  | 115.8                    | 112.3                    | 110.9                    |                    |
| Boc-Dmaa-D-Pro-Acbc-Leu-OMe ( <b>17b</b> )               | 110.8                  | 115.3                    | 112.3                    | 110.9                    |                    |
| Boc-Dmaa-D-Pro-Cle-Leu-OMe ( <b>18a</b> )                | 111.0                  | 114.8                    | 111.7                    | 110.2                    |                    |
| Boc-Dmaa-D-Pro-Cle-Leu-OMe ( <b>18b</b> )                | 110.8                  | 116.4                    | 111.3                    | 110.3                    |                    |
| Boc-Dmaa-D-Pro-Aic-Leu-OMe ( <b>19a</b> )                | 111.4                  | 114.6                    | 110.6                    | 111.6                    |                    |
| Boc-Dmaa-D-Pro-Aic-Leu-OMe ( <b>19b</b> )                | 113.5                  | 114.5                    | 112.6                    | 110.0                    |                    |
| Boc-Dmaa-D-Pro-Achc-Leu-OMe ( <b>22a</b> )               | 111.9                  | 117.4                    | 110.8                    | 109.4                    |                    |
| Boc-Dmaa-D-Pro-Achc-Leu-OMe ( <b>22b</b> )               | 112.0                  | 115.2                    | 109.8                    | 110.0                    |                    |
| Boc-Cys(Ph)-D-Pro-Achc-Leu-OMe ( <b>23</b> )             | 110.3                  | 115.2                    | 110.2                    | 111.0                    |                    |
| Boc-Dmaa-D-Pro-Gly-Leu-OMe ( <b>33a</b> )                | 111.1                  | 115.5                    | 115.6                    | 115.3                    |                    |
| Boc-Dmaa-D-Pro-Gly-Leu-OMe ( <b>33b</b> )                | 109.9                  | 113.8                    | 115.4                    | 113.9                    |                    |
| Boc-His( $\tau$ -Bn)-Pro-Aib- <i>(R)</i> - $\alpha$ -Mba | 109.4                  | 116.0                    | 112.6                    | N/A                      | <b>All Type I'</b> |
| <b>average</b>                                           | 110.7                  | 114.9                    | 114.2                    | 111.5                    | 112.8              |
| <b>st. dev.</b>                                          | 1.0                    | 1.0                      | 2.9                      | 1.6                      | 2.5                |
| <b>median</b>                                            | 110.8                  | 114.9                    | 114.0                    | 110.9                    | 112.3              |
| <b>minimum</b>                                           | 109.3                  | 113.4                    | 109.8                    | 109.4                    | 109.3              |
| <b>maximum</b>                                           | 113.5                  | 117.4                    | 118.0                    | 115.3                    | 118.0              |
| <b>count</b>                                             | 22                     | 22                       | 22                       | 21                       | 87.0               |

**Table S4.30:** Positional Distribution of Main-Chain Angles ( $\tau$ ) in Types I/I'  $\beta$ -Turns

| bin             | $\tau(i)$ ( $^\circ$ )<br>Count | $\tau(i+1)$ ( $^\circ$ )<br>Count | $\tau(i+2)$ ( $^\circ$ )<br>Count | $\tau(i+3)$ ( $^\circ$ )<br>Count |
|-----------------|---------------------------------|-----------------------------------|-----------------------------------|-----------------------------------|
| 100-102         | 0                               | 0                                 | 0                                 | 0                                 |
| 103-104         | 0                               | 0                                 | 0                                 | 0                                 |
| 105-106         | 0                               | 0                                 | 0                                 | 0                                 |
| 107-108         | 0                               | 0                                 | 0                                 | 0                                 |
| 109-110         | 14                              | 0                                 | 4                                 | 11                                |
| 111-112         | 7                               | 0                                 | 7                                 | 7                                 |
| 113-114         | 1                               | 11                                | 0                                 | 2                                 |
| 115-116         | 0                               | 10                                | 4                                 | 1                                 |
| 117-118         | 0                               | 1                                 | 7                                 | 0                                 |
| 119-120         | 0                               | 0                                 | 0                                 | 0                                 |
| <b>sum</b>      | 22                              | 22                                | 22                                | 21                                |
| <b>average</b>  | 110.7                           | 114.9                             | 114.2                             | 111.5                             |
| <b>st. dev.</b> | 1.0                             | 1.0                               | 2.9                               | 1.6                               |
| <b>median</b>   | 110.8                           | 114.9                             | 114.0                             | 110.9                             |
| <b>minimum</b>  | 109.3                           | 113.4                             | 109.8                             | 109.4                             |
| <b>maximum</b>  | 113.5                           | 117.4                             | 118.0                             | 115.3                             |
| <b>count</b>    | 22                              | 22                                | 22                                | 21                                |

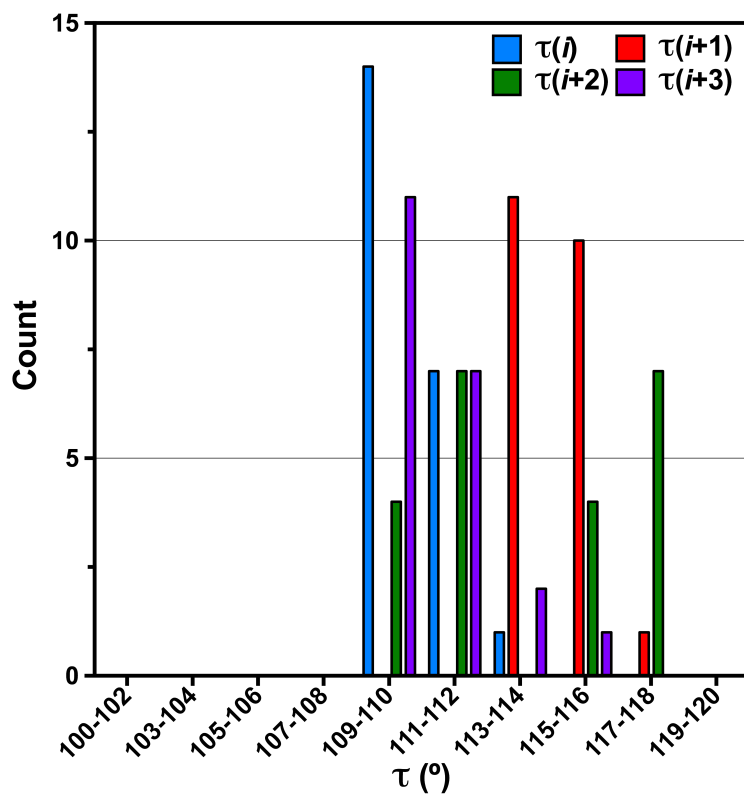

**Figure S4.11:** Histogram showing the distribution of  $\tau$  angles in type I/I'  $\beta$ -turns (reproduced from Figure 11i in the manuscript).

**Table S4.31: Interstrand Distances<sup>18</sup>**

| Peptide Sequence                                                       | $C\alpha(i)-C\alpha(i+3)$ | $C\beta(i)-C\beta(i+3)$ |
|------------------------------------------------------------------------|---------------------------|-------------------------|
| Boc-Dmaa-D-Pro-Acpc-Leu-NMe <sub>2</sub> ( <b>3a</b> )                 | 4.937                     | 4.100                   |
| Boc-Dmaa-D-Pro-Acpc-Leu-NMe <sub>2</sub> ( <b>3b</b> )                 | 5.389                     | 5.530                   |
| Boc-Dmaa-D-Pro-Acpc-Leu-NMe <sub>2</sub> ( <b>3c</b> )                 | 5.766                     | 6.160                   |
| Boc-Dmaa-D-Pro-Acpc-Leu-OMe ( <b>4a</b> )                              | 5.912                     | 6.160                   |
| Boc-Dmaa-D-Pro-Acpc-Leu-OMe ( <b>4b</b> )                              | 5.785                     | 6.030                   |
| Boc-Dmaa-D-Pro-Acpc-Leu-OMe ( <b>4c</b> )                              | 5.914                     | 5.706                   |
| Boc-Dmaa-D-Pro-Acpc-Leu-OMe ( <b>4d</b> )                              | 5.808                     | 6.187                   |
| Boc-Dmaa-D-Pro-Acpc-Leu-OMe ( <b>4e</b> )                              | 5.961                     | 7.168                   |
| Boc-Cys(Ph)-D-Pro-Acpc-Leu-OMe ( <b>5</b> )                            | 5.813                     | 5.998                   |
| Boc-Leu-D-Pro-Acpc-Leu-OMe ( <b>6</b> )                                | 5.407                     | 6.085                   |
| Boc-Dmaa-D-Pro-Acpc-Gly-OMe ( <b>7a</b> )                              | 4.782                     | N/A                     |
| Boc-Dmaa-D-Pro-Acpc-Gly-OMe ( <b>7b</b> )                              | 5.727                     | N/A                     |
| Boc-Dmaa-D-Pro-Acpc-Nle-NMe <sub>2</sub> ( <b>8</b> )                  | 5.052                     | 4.326                   |
| Boc-Dmaa-D-Pro-Acpc-Val-NMe <sub>2</sub> ( <b>9</b> )                  | 5.126                     | 4.617                   |
| Boc-Dmaa-D-Pro-Acpc-Val-OMe ( <b>10</b> )                              | 5.808                     | 5.825                   |
| Boc-Dmaa-D-Pro-Acpc-Chg-NMe <sub>2</sub> ( <b>11</b> )                 | 5.324                     | 4.970                   |
| Boc-Dmaa-D-Pro-Acpc-Phe-NMe <sub>2</sub> ( <b>12</b> )                 | 4.960                     | 4.077                   |
| Boc-Dmaa-D-Pro-Acpc-Phe-OMe ( <b>13</b> )                              | 5.488                     | 5.999                   |
| Boc-Dmaa-D-Pro-Acpc-D-Phe-NMe <sub>2</sub> ( <b>14</b> )               | 5.133                     | 6.000                   |
| Boc-Dmaa-Pro-Acpc-Leu-OMe ( <b>15</b> )                                | 5.097                     | 4.363                   |
| Boc-Dmaa-D-Pro-Acbc-Leu-NMe <sub>2</sub> ( <b>16a</b> )                | 5.045                     | 4.437                   |
| Boc-Dmaa-D-Pro-Acbc-Leu-NMe <sub>2</sub> ( <b>16b</b> )                | 5.389                     | 5.530                   |
| Boc-Dmaa-D-Pro-Acbc-Leu-NMe <sub>2</sub> ( <b>16c</b> )                | 5.876                     | 6.209                   |
| Boc-Dmaa-D-Pro-Acbc-Leu-OMe ( <b>17a</b> )                             | 6.161                     | 6.012                   |
| Boc-Dmaa-D-Pro-Acbc-Leu-OMe ( <b>17b</b> )                             | 5.951                     | 5.651                   |
| Boc-Dmaa-D-Pro-Cle-Leu-OMe ( <b>18a</b> )                              | 5.957                     | 5.640                   |
| Boc-Dmaa-D-Pro-Cle-Leu-OMe ( <b>18b</b> )                              | 6.053                     | 5.742                   |
| Boc-Dmaa-D-Pro-Aic-Leu-OMe ( <b>19a</b> )                              | 5.982                     | 5.833                   |
| Boc-Dmaa-D-Pro-Aic-Leu-OMe ( <b>19b</b> )                              | 5.307                     | 4.913                   |
| Boc-Dmaa-D-Pro-Aic-D-Phe-NMe <sub>2</sub> ( <b>20a</b> )               | 5.339                     | 4.980                   |
| Boc-Dmaa-D-Pro-Aic-D-Phe-NMe <sub>2</sub> ( <b>20b</b> )               | 5.632                     | 5.740                   |
| Boc-Dmaa-Pro-Aic-Leu-OMe ( <b>21a</b> )                                | 5.277                     | 5.029                   |
| Boc-Dmaa-Pro-Aic-Leu-OMe ( <b>21b</b> )                                | 5.303                     | 5.230                   |
| Boc-Dmaa-D-Pro-Achc-Leu-OMe ( <b>22a</b> )                             | 5.960                     | 5.377                   |
| Boc-Dmaa-D-Pro-Achc-Leu-OMe ( <b>22b</b> )                             | 6.156                     | 5.861                   |
| Boc-Cys(Ph)-D-Pro-Achc-Leu-OMe ( <b>23</b> )                           | 5.963                     | 5.842                   |
| Boc-Dmaa-D-Pro-Aib-Leu-NMe <sub>2</sub> ( <b>24</b> )                  | 5.808                     | 5.825                   |
| Boc-Dmaa-D-Pro-Aib-Leu-OMe ( <b>25</b> )                               | 5.054                     | 4.885                   |
| Boc-Dmaa-D-Pro-Aib-Val-OMe ( <b>26</b> )                               | 5.199                     | 5.425                   |
| Boc-Dmaa-D-Pro-Aib-Phe-OMe ( <b>27</b> )                               | 4.968                     | 4.189                   |
| Boc-Dmaa-D-Pro-Aib-3-Pal-NMe <sub>2</sub> ( <b>28</b> )                | 5.170                     | 4.938                   |
| Boc-Dmaa-D-Pro-Aib-2-Thi-NMe <sub>2</sub> ( <b>29a</b> )               | 4.988                     | 4.302                   |
| Boc-Dmaa-D-Pro-Aib-2-Thi-NMe <sub>2</sub> ( <b>29b</b> )               | 4.990                     | 4.182                   |
| Boc-Dmaa-Pro-Aib-Leu-OMe ( <b>30</b> )                                 | 5.183                     | 4.752                   |
| Boc-Dmaa-D-Pro-Ala-Phe-OMe ( <b>31</b> )                               | 5.463                     | 5.955                   |
| Boc-Dmaa-D-Pro-Phe-Leu-NMe <sub>2</sub> ( <b>32a</b> )                 | 7.199                     | 6.940                   |
| Boc-Dmaa-D-Pro-Phe-Leu-NMe <sub>2</sub> ( <b>32b</b> )                 | 7.637                     | 7.101                   |
| Boc-Dmaa-D-Pro-Gly-Leu-OMe ( <b>33a</b> )                              | 5.665                     | 6.043                   |
| Boc-Dmaa-D-Pro-Gly-Leu-OMe ( <b>33b</b> )                              | 5.634                     | 5.791                   |
| Boc-Keto-D-Pro-Aib-Phe-OMe ( <b>34</b> )                               | 4.989                     | 4.359                   |
| Boc-Phe-Pro-Aib-( <i>R</i> )- $\alpha$ -Mba ( <b>35</b> )              | 5.567                     | 5.082                   |
| 2-Msa-Pro-D-Val-( <i>R</i> )- $\alpha$ -Mba ( <b>36</b> )              | 5.389                     | 4.386                   |
| Boc-His( $\tau$ -Bn)-Pro-Aib-( <i>R</i> )- $\alpha$ -Mba ( <b>37</b> ) | 5.867                     | 5.313                   |
| <b>average</b>                                                         | 5.572                     | 5.427                   |
| <b>st. dev.</b>                                                        | 0.531                     | 0.783                   |
| <b>median</b>                                                          | 5.488                     | 5.640                   |
| <b>minimum</b>                                                         | 4.782                     | 4.077                   |
| <b>maximum</b>                                                         | 7.637                     | 7.168                   |
| <b>count</b>                                                           | 53                        | 51                      |

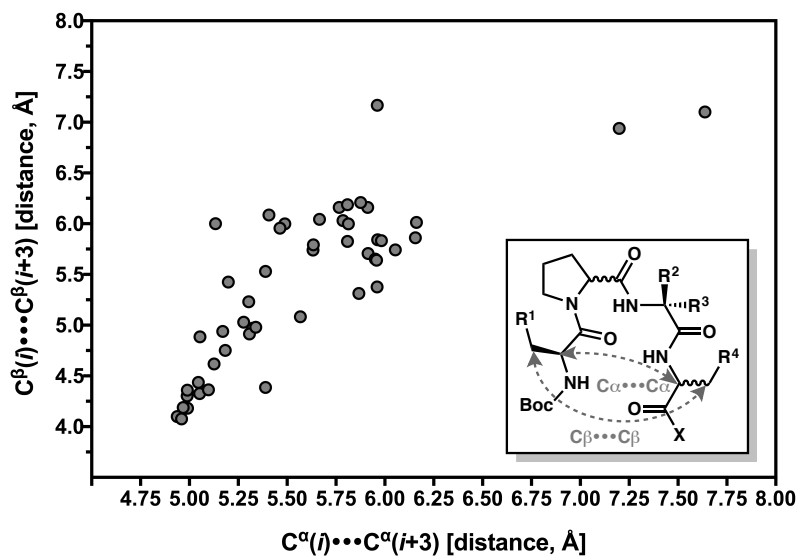

**Figure S4.12:** A plot of  $C^\beta$ – $C^\beta$  distance vs.  $C^\alpha$ – $C^\alpha$  shows a loose trend; larger  $C^\alpha$ – $C^\alpha$  distances tend to correlate with longer  $C^\beta$ – $C^\beta$  distances.

### C. Side-chain ( $\chi_1$ ) Dihedrals

**Table S4.32:** Side-chain  $\chi_1$  Dihedrals for All Peptides<sup>23</sup>

| Peptide Sequence                                                       | $\chi_1(i)$ | $\chi_1(i+3)$ |
|------------------------------------------------------------------------|-------------|---------------|
| Boc-Dmaa-D-Pro-Acpc-Leu-NMe <sub>2</sub> ( <b>3a</b> )                 | -51.7       | -44.9         |
| Boc-Dmaa-D-Pro-Acpc-Leu-NMe <sub>2</sub> ( <b>3b</b> )                 | -168.6      | -168.3        |
| Boc-Dmaa-D-Pro-Acpc-Leu-NMe <sub>2</sub> ( <b>3c</b> )                 | -169.9      | -55.8         |
| Boc-Dmaa-D-Pro-Acpc-Leu-OMe ( <b>4a</b> )                              | -170.8      | -66.0         |
| Boc-Dmaa-D-Pro-Acpc-Leu-OMe ( <b>4b</b> )                              | -167.2      | -59.3         |
| Boc-Dmaa-D-Pro-Acpc-Leu-OMe ( <b>4c</b> )                              | -169.9      | -67.2         |
| Boc-Dmaa-D-Pro-Acpc-Leu-OMe ( <b>4d</b> )                              | -164.5      | -58.3         |
| Boc-Dmaa-D-Pro-Acpc-Leu-OMe ( <b>4e</b> )                              | -167.8      | 57.3          |
| Boc-Cys(Ph)-D-Pro-Acpc-Leu-OMe ( <b>5</b> )                            | -164.2      | -60.6         |
| Boc-Leu-D-Pro-Acpc-Leu-OMe ( <b>6</b> )                                | -64.1       | -53.5         |
| Boc-Dmaa-D-Pro-Acpc-Gly-OMe ( <b>7a</b> )                              | -49.2       | N/A           |
| Boc-Dmaa-D-Pro-Acpc-Gly-OMe ( <b>7b</b> )                              | -63.1       | N/A           |
| Boc-Dmaa-D-Pro-Acpc-Nle-NMe <sub>2</sub> ( <b>8</b> )                  | -57.7       | -56.4         |
| Boc-Dmaa-D-Pro-Acpc-Val-NMe <sub>2</sub> ( <b>9</b> )                  | -52.3       | N/A           |
| Boc-Dmaa-D-Pro-Acpc-Val-OMe ( <b>10</b> )                              | -103.0      | N/A           |
| Boc-Dmaa-D-Pro-Acpc-Chg-NMe <sub>2</sub> ( <b>11</b> )                 | -53.0       | -66.9         |
| Boc-Dmaa-D-Pro-Acpc-Phe-NMe <sub>2</sub> ( <b>12</b> )                 | -171.7      | -86.6         |
| Boc-Dmaa-D-Pro-Acpc-Phe-OMe ( <b>13</b> )                              | -68.5       | -167.2        |
| Boc-Dmaa-D-Pro-Acpc-D-Phe-NMe <sub>2</sub> ( <b>14</b> )               | -158.1      | 166.4         |
| Boc-Dmaa-Pro-Acpc-Leu-OMe ( <b>15</b> )                                | -57.0       | -68.8         |
| Boc-Dmaa-D-Pro-Acbc-Leu-NMe <sub>2</sub> ( <b>16a</b> )                | -167.2      | -56.5         |
| Boc-Dmaa-D-Pro-Acbc-Leu-NMe <sub>2</sub> ( <b>16b</b> )                | -51.1       | -64.7         |
| Boc-Dmaa-D-Pro-Acbc-Leu-NMe <sub>2</sub> ( <b>16c</b> )                | -168.8      | -55.2         |
| Boc-Dmaa-D-Pro-Acbc-Leu-OMe ( <b>17a</b> )                             | -169.9      | -65.5         |
| Boc-Dmaa-D-Pro-Acbc-Leu-OMe ( <b>17b</b> )                             | -170.0      | -73.3         |
| Boc-Dmaa-D-Pro-Cle-Leu-OMe ( <b>18a</b> )                              | -172.4      | -68.3         |
| Boc-Dmaa-D-Pro-Cle-Leu-OMe ( <b>18b</b> )                              | -168.3      | -65.3         |
| Boc-Dmaa-D-Pro-Aic-Leu-OMe ( <b>19a</b> )                              | -175.0      | -64.4         |
| Boc-Dmaa-D-Pro-Aic-Leu-OMe ( <b>19b</b> )                              | -51.3       | -63.9         |
| Boc-Dmaa-D-Pro-Aic-D-Phe-NMe <sub>2</sub> ( <b>20a</b> )               | -171.5      | 178.0         |
| Boc-Dmaa-D-Pro-Aic-D-Phe-NMe <sub>2</sub> ( <b>20b</b> )               | -57.9       | 172.4         |
| Boc-Dmaa-Pro-Aic-Leu-OMe ( <b>21a</b> )                                | -84.9       | 178.0         |
| Boc-Dmaa-Pro-Aic-Leu-OMe ( <b>21b</b> )                                | -68.5       | -176.8        |
| Boc-Dmaa-D-Pro-Achc-Leu-OMe ( <b>22a</b> )                             | -174.9      | -91.8         |
| Boc-Dmaa-D-Pro-Achc-Leu-OMe ( <b>22b</b> )                             | -168.8      | -71.0         |
| Boc-Cys(Ph)-D-Pro-Achc-Leu-OMe ( <b>23</b> )                           | -156.7      | -67.5         |
| Boc-Dmaa-D-Pro-Aib-Leu-NMe <sub>2</sub> ( <b>24</b> )                  | -59.5       | -57.0         |
| Boc-Dmaa-D-Pro-Aib-Leu-OMe ( <b>25</b> )                               | -179.2      | -54.0         |
| Boc-Dmaa-D-Pro-Aib-Val-OMe ( <b>26</b> )                               | -160.4      | N/A           |
| Boc-Dmaa-D-Pro-Aib-Phe-OMe ( <b>27</b> )                               | -170.1      | -68.9         |
| Boc-Dmaa-D-Pro-Aib-3-Pal-NMe <sub>2</sub> ( <b>28</b> )                | -170.1      | 179.5         |
| Boc-Dmaa-D-Pro-Aib-2-Thi-NMe <sub>2</sub> ( <b>29a</b> )               | -58.9       | -77.6         |
| Boc-Dmaa-D-Pro-Aib-2-Thi-NMe <sub>2</sub> ( <b>29b</b> )               | -58.6       | -80.0         |
| Boc-Dmaa-Pro-Aib-Leu-OMe ( <b>30</b> )                                 | -76.6       | 177.5         |
| Boc-Dmaa-D-Pro-Ala-Phe-OMe ( <b>31</b> )                               | -70.3       | -166.9        |
| Boc-Dmaa-D-Pro-Phe-Leu-NMe <sub>2</sub> ( <b>32a</b> )                 | -67.1       | -175.8        |
| Boc-Dmaa-D-Pro-Phe-Leu-NMe <sub>2</sub> ( <b>32b</b> )                 | -75.5       | -68.5         |
| Boc-Dmaa-D-Pro-Gly-Leu-OMe ( <b>33a</b> )                              | -175.6      | -69.0         |
| Boc-Dmaa-D-Pro-Gly-Leu-OMe ( <b>33b</b> )                              | -175.3      | -67.3         |
| Boc-Keto-D-Pro-Aib-Phe-OMe ( <b>34</b> )                               | -174.3      | -59.1         |
| Boc-Phe-Pro-Aib-( <i>R</i> )- $\alpha$ -Mba ( <b>35</b> )              | -55.7       | N/A           |
| 2-Msa-Pro-D-Val-( <i>R</i> )- $\alpha$ -Mba ( <b>36</b> )              | N/A         | N/A           |
| Boc-His( $\tau$ -Bn)-Pro-Aib-( <i>R</i> )- $\alpha$ -Mba ( <b>37</b> ) | -160.9      | N/A           |
| <b>average</b>                                                         | -122.3      | -42.2         |
| <b>st. dev.</b>                                                        | 53.8        | 95.0          |
| <b>median</b>                                                          | -160.7      | -65.3         |
| <b>minimum</b>                                                         | -179.2      | -176.8        |
| <b>maximum</b>                                                         | -49.2       | 179.5         |
| <b>count</b>                                                           | 52          | 45            |

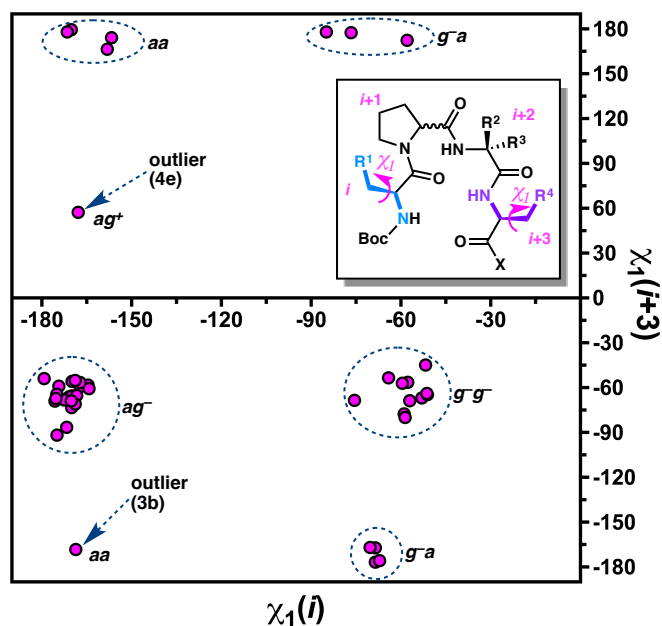

**Figure S4.13:** Plot of  $\chi_1(i+3)$  vs.  $\chi_1(i+1)$  shows clustering of peptides with similar side-chain dihedrals (reproduced from Figure 11e in the manuscript).

**Table S4.33:** Side-chain  $\chi_1$  Dihedrals for  $ag^-$  Cluster in Figure S4.13

| $ag^-$                                                  | $\chi_1(i)$ | $\chi_1(i+3)$ | Turn Type    |
|---------------------------------------------------------|-------------|---------------|--------------|
| Boc-Dmaa-D-Pro-Acpc-Leu-NMe <sub>2</sub> ( <b>3c</b> )  | -169.9      | -55.8         | I'           |
| Boc-Dmaa-D-Pro-Acpc-Leu-OMe ( <b>4a</b> )               | -170.8      | -66.0         | I'           |
| Boc-Dmaa-D-Pro-Acpc-Leu-OMe ( <b>4b</b> )               | -167.2      | -59.3         | I'           |
| Boc-Dmaa-D-Pro-Acpc-Leu-OMe ( <b>4c</b> )               | -169.9      | -67.2         | I'           |
| Boc-Dmaa-D-Pro-Acpc-Leu-OMe ( <b>4d</b> )               | -164.5      | -58.3         | I'           |
| Boc-Cys(Ph)-D-Pro-Acpc-Leu-OMe ( <b>5</b> )             | -164.2      | -60.6         | I'           |
| Boc-Dmaa-D-Pro-Acpc-Phe-NMe <sub>2</sub> ( <b>12</b> )  | -171.7      | -86.6         | II'          |
| Boc-Dmaa-D-Pro-Acbc-Leu-NMe <sub>2</sub> ( <b>16a</b> ) | -167.2      | -56.5         | II'          |
| Boc-Dmaa-D-Pro-Acbc-Leu-NMe <sub>2</sub> ( <b>16c</b> ) | -168.8      | -55.2         | I'           |
| Boc-Dmaa-D-Pro-Acbc-Leu-OMe ( <b>17a</b> )              | -169.9      | -65.5         | I'           |
| Boc-Dmaa-D-Pro-Acbc-Leu-OMe ( <b>17b</b> )              | -170.0      | -73.3         | I'           |
| Boc-Dmaa-D-Pro-Cle-Leu-OMe ( <b>18a</b> )               | -172.4      | -68.3         | I'           |
| Boc-Dmaa-D-Pro-Cle-Leu-OMe ( <b>18b</b> )               | -168.3      | -65.3         | I'           |
| Boc-Dmaa-D-Pro-Aic-Leu-OMe ( <b>19a</b> )               | -175.0      | -64.4         | I'           |
| Boc-Dmaa-D-Pro-Achc-Leu-OMe ( <b>22a</b> )              | -174.9      | -91.8         | I'           |
| Boc-Dmaa-D-Pro-Achc-Leu-OMe ( <b>22b</b> )              | -168.8      | -71.0         | I'           |
| Boc-Cys(Ph)-D-Pro-Achc-Leu-OMe ( <b>23</b> )            | -156.7      | -67.5         | I'           |
| Boc-Dmaa-D-Pro-Aib-Leu-NMe <sub>2</sub> ( <b>24</b> )   | -59.5       | -57.0         | II'          |
| Boc-Dmaa-D-Pro-Aib-Phe-OMe ( <b>27</b> )                | -170.1      | -68.9         | II'          |
| Boc-Dmaa-D-Pro-Gly-Leu-OMe ( <b>33a</b> )               | -175.6      | -69.0         | I'           |
| Boc-Dmaa-D-Pro-Gly-Leu-OMe ( <b>33b</b> )               | -175.3      | -67.3         | I'           |
| Boc-Keto-D-Pro-Aib-Phe-OMe ( <b>34</b> )                | -174.3      | -59.1         | II'          |
| <b>average</b>                                          | -164.8      | -66.1         | total I/I'   |
| <b>st. dev.</b>                                         | 23.9        | 9.2           | 17           |
| <b>median</b>                                           | -169.9      | -65.8         | total II/II' |
| <b>minimum</b>                                          | -175.6      | -91.8         | 5            |
| <b>maximum</b>                                          | -59.5       | -55.2         |              |
| <b>count</b>                                            | 22          | 22            |              |

**Table S4.34:** Side-chain  $\chi_1$  Dihedrals for  $g^-g^-$  Cluster in Figure S4.13

| $g^-g^-$                                                 | $\chi_1(i)$ | $\chi_1(i+3)$ | Turn Type    |
|----------------------------------------------------------|-------------|---------------|--------------|
| Boc-Dmaa-D-Pro-Acpc-Leu-NMe <sub>2</sub> ( <b>3a</b> )   | -51.7       | -44.9         | II'          |
| Boc-Leu-D-Pro-Acpc-Leu-OMe ( <b>6</b> )                  | -64.1       | -53.5         | II'          |
| Boc-Dmaa-D-Pro-Acpc-Nle-NMe <sub>2</sub> ( <b>8</b> )    | -57.7       | -56.4         | II'          |
| Boc-Dmaa-D-Pro-Acpc-Chg-NMe <sub>2</sub> ( <b>11</b> )   | -53.0       | -66.9         | II'          |
| Boc-Dmaa-Pro-Acpc-Leu-OMe ( <b>15</b> )                  | -57.0       | -68.8         | II           |
| Boc-Dmaa-D-Pro-Acpc-Leu-NMe <sub>2</sub> ( <b>16b</b> )  | -51.1       | -64.7         | II'          |
| Boc-Dmaa-D-Pro-Aic-Leu-OMe ( <b>19b</b> )                | -51.3       | -63.9         | I'           |
| Boc-Dmaa-D-Pro-Aib-Leu-NMe <sub>2</sub> ( <b>24</b> )    | -59.5       | -57.0         | II'          |
| Boc-Dmaa-D-Pro-Aib-2-Thi-NMe <sub>2</sub> ( <b>29a</b> ) | -58.9       | -77.6         | II'          |
| Boc-Dmaa-D-Pro-Aib-2-Thi-NMe <sub>2</sub> ( <b>29b</b> ) | -58.6       | -80.0         | II'          |
| Boc-Dmaa-D-Pro-Phe-Leu-NMe <sub>2</sub> ( <b>32b</b> )   | -75.5       | -68.5         | N/A          |
| <b>average</b>                                           | -58.0       | -63.8         | total II/II' |
| <b>st. dev.</b>                                          | 7.1         | 10.4          | 9            |
| <b>median</b>                                            | -57.7       | -64.7         | total I/I'   |
| <b>minimum</b>                                           | -75.5       | -80.0         | 1            |
| <b>maximum</b>                                           | -51.1       | -44.9         |              |
| <b>count</b>                                             | 11          | 11            |              |

**Table S4.35:** Side-chain  $\chi_1$  Dihedrals for  $g^-a^-$  Cluster in Figure S4.13

| $g^-a^-$                                               | $\chi_1(i)$ | $\chi_1(i+3)$ | Turn Type    |
|--------------------------------------------------------|-------------|---------------|--------------|
| Boc-Dmaa-D-Pro-Acpc-Phe-OMe ( <b>13</b> )              | -68.5       | -167.2        | II'          |
| Boc-Dmaa-Pro-Aic-Leu-OMe ( <b>21b</b> )                | -68.5       | -176.8        | II           |
| Boc-Dmaa-D-Pro-Ala-Phe-OMe ( <b>31</b> )               | -70.3       | -166.9        | II'          |
| Boc-Dmaa-D-Pro-Phe-Leu-NMe <sub>2</sub> ( <b>32a</b> ) | -67.1       | -175.8        | N/A          |
| <b>average</b>                                         | -68.6       | -171.7        | total II/II' |
| <b>st. dev.</b>                                        | 1.3         | 5.4           | 3            |
| <b>median</b>                                          | -68.5       | -171.5        | total I/I'   |
| <b>minimum</b>                                         | -70.3       | -176.8        | 0            |
| <b>maximum</b>                                         | -67.1       | -166.9        |              |
| <b>count</b>                                           | 4           | 4             |              |

**Table S4.36:** Side-chain  $\chi_1$  Dihedrals for  $g^-a$  Cluster in Figure S4.13

| $g^-a$                                                   | $\chi_1(i)$ | $\chi_1(i+3)$ | Turn Type    |
|----------------------------------------------------------|-------------|---------------|--------------|
| Boc-Dmaa-Pro-Aib-Leu-OMe ( <b>30</b> )                   | -76.6       | 177.5         | II           |
| Boc-Dmaa-Pro-Aic-Leu-OMe ( <b>21a</b> )                  | -84.9       | 178.0         | II           |
| Boc-Dmaa-D-Pro-Aic-D-Phe-NMe <sub>2</sub> ( <b>20b</b> ) | -57.9       | 172.4         | II'          |
| <b>average</b>                                           | -73.1       | 176.0         | total II/II' |
| <b>st. dev.</b>                                          | 13.8        | 3.1           | 3            |
| <b>median</b>                                            | -76.6       | 177.5         | total I/I'   |
| <b>minimum</b>                                           | -84.9       | 172.4         | 0            |
| <b>maximum</b>                                           | -57.9       | 178.0         |              |
| <b>count</b>                                             | 3           | 3             |              |

**Table S4.37:** Side-chain  $\chi_1$  Dihedrals for  $aa$  Cluster in Figure S4.13

| $aa$                                                     | $\chi_1(i)$ | $\chi_1(i+3)$ | Turn Type    |
|----------------------------------------------------------|-------------|---------------|--------------|
| Boc-Dmaa-D-Pro-Acpc-D-Phe-NMe <sub>2</sub> ( <b>14</b> ) | -158.1      | 166.4         | II'          |
| Boc-Dmaa-D-Pro-Aic-D-Phe-NMe <sub>2</sub> ( <b>20a</b> ) | -171.5      | 178.0         | II'          |
| Boc-Dmaa-D-Pro-Aib-3-Pal-NMe <sub>2</sub> ( <b>28</b> )  | -170.1      | 179.5         | II'          |
| <b>average</b>                                           | -166.6      | 174.6         | total II/II' |
| <b>st. dev.</b>                                          | 7.4         | 7.2           | 3            |
| <b>median</b>                                            | -170.1      | 178.0         | total I/I'   |
| <b>minimum</b>                                           | -171.5      | 166.4         | 0            |
| <b>maximum</b>                                           | -158.1      | 179.5         |              |
| <b>count</b>                                             | 3           | 3             |              |

**Table S4.38:** Summary of *gauche* & *anti*  $\chi_1$  Values in Figure S4.13

| Turn Motif  | total | <i>a</i> ( <i>i</i> ) | <i>g</i> ( <i>i</i> ) | <i>a</i> ( <i>i</i> +3) | <i>g</i> ( <i>i</i> +3) |
|-------------|-------|-----------------------|-----------------------|-------------------------|-------------------------|
| type I/I'   | 19    | 18<br>94.7%           | 1<br>5.3%             | 0<br>0.0%               | 19<br>100.0%            |
| type II/II' | 23    | 8<br>34.8%            | 15<br>65.2%           | 9<br>39.1%              | 14<br>60.9%             |



## D. Hydrogen Bonding<sup>24</sup>

**Table S4.39:** H-Bond Lengths (*r*) & Angles ( $\theta$ ) for All Peptides

| Peptide Sequence                                                       | NH( <i>i</i> +3)···O( <i>i</i> )<br>[Central $\beta$ -Turn] |              | NH( <i>j</i> )···O( <i>i</i> +3)<br>[ $\beta$ -Hairpin] |              | NH( <i>i</i> +2)···O( <i>i</i> )<br>[ $\gamma$ -Turn] |              | NH( <i>i</i> +2)···O( <i>i</i> -1)<br>[N-Terminal $\beta$ -Turn] |              |
|------------------------------------------------------------------------|-------------------------------------------------------------|--------------|---------------------------------------------------------|--------------|-------------------------------------------------------|--------------|------------------------------------------------------------------|--------------|
|                                                                        | <i>r</i> (Å)                                                | $\theta$ (°) | <i>r</i> (Å)                                            | $\theta$ (°) | <i>r</i> (Å)                                          | $\theta$ (°) | <i>r</i> (Å)                                                     | $\theta$ (°) |
| Boc-Dmaa-D-Pro-Acpc-Leu-NMe <sub>2</sub> ( <b>3a</b> )                 | 2.952                                                       | 156          | 2.906                                                   | 158          | 3.029                                                 | 96           |                                                                  |              |
| Boc-Dmaa-D-Pro-Acpc-Leu-NMe <sub>2</sub> ( <b>3b</b> )                 | 2.968                                                       | 167          | 2.937                                                   | 168          | 3.334                                                 | 87           |                                                                  |              |
| Boc-Dmaa-D-Pro-Acpc-Leu-NMe <sub>2</sub> ( <b>3c</b> )                 | 3.022                                                       | 167          |                                                         |              |                                                       |              | 2.871                                                            | 158          |
| Boc-Dmaa-D-Pro-Acpc-Leu-OMe ( <b>4a</b> )                              | 3.096                                                       | 165          |                                                         |              |                                                       |              | 2.964                                                            | 145          |
| Boc-Dmaa-D-Pro-Acpc-Leu-OMe ( <b>4b</b> )                              | 3.046                                                       | 168          |                                                         |              |                                                       |              | 2.958                                                            | 157          |
| Boc-Dmaa-D-Pro-Acpc-Leu-OMe ( <b>4c</b> )                              | 3.008                                                       | 168          |                                                         |              |                                                       |              | 2.963                                                            | 166          |
| Boc-Dmaa-D-Pro-Acpc-Leu-OMe ( <b>4d</b> )                              | 3.059                                                       | 174          |                                                         |              |                                                       |              | 2.915                                                            | 154          |
| Boc-Dmaa-D-Pro-Acpc-Leu-OMe ( <b>4e</b> )                              | 3.093                                                       | 170          |                                                         |              |                                                       |              | 2.899                                                            | 167          |
| Boc-Cys(Ph)-D-Pro-Acpc-Leu-OMe ( <b>5</b> )                            | 3.099                                                       | 165          |                                                         |              |                                                       |              | 3.005                                                            | 162          |
| Boc-Leu-D-Pro-Acpc-Leu-OMe ( <b>6</b> )                                | 2.875                                                       | 149          | 3.260                                                   | 160          | 3.281                                                 | 75           |                                                                  |              |
| Boc-Dmaa-D-Pro-Acpc-Gly-OMe ( <b>7a</b> )                              | 2.804                                                       | 157          |                                                         |              | 3.172                                                 | 90           |                                                                  |              |
| Boc-Dmaa-D-Pro-Acpc-Gly-OMe ( <b>7b</b> )                              | 3.006                                                       | 162          |                                                         |              | 3.128                                                 | 64           | 3.256                                                            | 127          |
| Boc-Dmaa-D-Pro-Acpc-Nle-NMe <sub>2</sub> ( <b>8</b> )                  | 2.986                                                       | 162          | 2.858                                                   | 173          | 3.239                                                 | 86           |                                                                  |              |
| Boc-Dmaa-D-Pro-Acpc-Val-NMe <sub>2</sub> ( <b>9</b> )                  | 3.038                                                       | 165          | 2.856                                                   | 161          | 3.222                                                 | 85           |                                                                  |              |
| Boc-Dmaa-D-Pro-Acpc-Val-OMe ( <b>10</b> )                              | 2.927                                                       | 171          | 2.954                                                   | 159          | 3.011                                                 | 97           |                                                                  |              |
| Boc-Dmaa-D-Pro-Acpc-Chg-NMe <sub>2</sub> ( <b>11</b> )                 | 2.994                                                       | 161          | 2.833                                                   | 162          | 3.214                                                 | 85           |                                                                  |              |
| Boc-Dmaa-D-Pro-Acpc-Phe-NMe <sub>2</sub> ( <b>12</b> )                 | 2.887                                                       | 159          | 2.926                                                   | 164          | 3.206                                                 | 91           |                                                                  |              |
| Boc-Dmaa-D-Pro-Acpc-Phe-OMe ( <b>13</b> )                              | 2.904                                                       | 156          | 3.274                                                   | 162          | 3.301                                                 | 81           |                                                                  |              |
| Boc-Dmaa-D-Pro-Acpc-D-Phe-NMe <sub>2</sub> ( <b>14</b> )               | 2.895                                                       | 165          | 3.122                                                   | 171          | 3.213                                                 | 81           |                                                                  |              |
| Boc-Dmaa-Pro-Acpc-Leu-OMe ( <b>15</b> )                                | 2.856                                                       | 163          | 3.243                                                   | 165          | 3.163                                                 | 81           |                                                                  |              |
| Boc-Dmaa-D-Pro-Acbc-Leu-NMe <sub>2</sub> ( <b>16a</b> )                | 2.995                                                       | 154          | 2.859                                                   | 175          | 3.276                                                 | 84           |                                                                  |              |
| Boc-Dmaa-D-Pro-Acbc-Leu-NMe <sub>2</sub> ( <b>16b</b> )                | 3.190                                                       | 172          | 2.805                                                   | 137          | 3.055                                                 | 96           |                                                                  |              |
| Boc-Dmaa-D-Pro-Acbc-Leu-NMe <sub>2</sub> ( <b>16c</b> )                | 3.106                                                       | 160          |                                                         |              |                                                       |              | 2.891                                                            | 159          |
| Boc-Dmaa-D-Pro-Acbc-Leu-OMe ( <b>17a</b> )                             | 3.141                                                       | 160          |                                                         |              |                                                       |              | 3.046                                                            | 170          |
| Boc-Dmaa-D-Pro-Acbc-Leu-OMe ( <b>17b</b> )                             | 3.045                                                       | 163          |                                                         |              |                                                       |              | 3.093                                                            | 156          |
| Boc-Dmaa-D-Pro-Cle-Leu-OMe ( <b>18a</b> )                              | 3.031                                                       | 169          |                                                         |              | 3.109                                                 | 98           | 3.236                                                            | 156          |
| Boc-Dmaa-D-Pro-Cle-Leu-OMe ( <b>18b</b> )                              | 3.030                                                       | 173          |                                                         |              | 3.011                                                 | 99           | 3.179                                                            | 158          |
| Boc-Dmaa-D-Pro-Aic-Leu-OMe ( <b>19a</b> )                              | 3.192                                                       | 157          |                                                         |              | 3.157                                                 | 100          | 3.198                                                            | 153          |
| Boc-Dmaa-D-Pro-Aic-Leu-OMe ( <b>19b</b> )                              | 2.897                                                       | 154          |                                                         |              | 3.160                                                 | 91           | 2.926                                                            | 152          |
| Boc-Dmaa-D-Pro-Aic-D-Phe-NMe <sub>2</sub> ( <b>20a</b> )               | 2.926                                                       | 150          |                                                         |              | 3.227                                                 | 76           |                                                                  |              |
| Boc-Dmaa-D-Pro-Aic-D-Phe-NMe <sub>2</sub> ( <b>20b</b> )               | 3.034                                                       | 163          |                                                         |              | 3.237                                                 | 80           |                                                                  |              |
| Boc-Dmaa-Pro-Aic-Leu-OMe ( <b>21a</b> )                                | 3.057                                                       | 154          |                                                         |              | 3.283                                                 | 79           |                                                                  |              |
| Boc-Dmaa-Pro-Aic-Leu-OMe ( <b>21b</b> )                                | 3.062                                                       | 146          |                                                         |              | 3.273                                                 | 71           |                                                                  |              |
| Boc-Dmaa-D-Pro-Achc-Leu-OMe ( <b>22a</b> )                             | 2.919                                                       | 167          |                                                         |              | 2.970                                                 | 101          | 3.297                                                            | 165          |
| Boc-Dmaa-D-Pro-Achc-Leu-OMe ( <b>22b</b> )                             | 3.115                                                       | 164          |                                                         |              | 3.108                                                 | 102          | 3.358                                                            | 161          |
| Boc-Cys(Ph)-D-Pro-Achc-Leu-OMe ( <b>23</b> )                           | 2.980                                                       | 167          |                                                         |              | 3.181                                                 | 107          | 3.218                                                            | 160          |
| Boc-Dmaa-D-Pro-Aib-Leu-NMe <sub>2</sub> ( <b>24</b> )                  | 2.895                                                       | 157          | 2.998                                                   | 162          | 3.181                                                 | 83           |                                                                  |              |
| Boc-Dmaa-D-Pro-Aib-Leu-OMe ( <b>25</b> )                               | 2.813                                                       | 149          | 3.027                                                   | 165          | 3.303                                                 | 82           |                                                                  |              |
| Boc-Dmaa-D-Pro-Aib-Val-OMe ( <b>26</b> )                               | 2.929                                                       | 159          | 2.946                                                   | 170          | 3.282                                                 | 79           |                                                                  |              |
| Boc-Dmaa-D-Pro-Aib-Phe-OMe ( <b>27</b> )                               | 2.861                                                       | 159          | 2.959                                                   | 163          | 3.181                                                 | 83           |                                                                  |              |
| Boc-Dmaa-D-Pro-Aib-3-Pal-NMe <sub>2</sub> ( <b>28</b> )                | 2.887                                                       | 164          | 2.974                                                   | 163          | 3.134                                                 | 72           |                                                                  |              |
| Boc-Dmaa-D-Pro-Aib-2-Thi-NMe <sub>2</sub> ( <b>29a</b> )               | 2.950                                                       | 150          | 2.892                                                   | 173          | 3.237                                                 | 78           |                                                                  |              |
| Boc-Dmaa-D-Pro-Aib-2-Thi-NMe <sub>2</sub> ( <b>29b</b> )               | 2.955                                                       | 149          | 2.868                                                   | 156          | 3.264                                                 | 78           |                                                                  |              |
| Boc-Dmaa-Pro-Aib-Leu-OMe ( <b>30</b> )                                 | 3.054                                                       | 153          |                                                         |              | 3.290                                                 | 73           |                                                                  |              |
| Boc-Dmaa-D-Pro-Ala-Phe-OMe ( <b>31</b> )                               | 2.904                                                       | 153          | 3.249                                                   | 164          | 3.339                                                 | 79           |                                                                  |              |
| Boc-Dmaa-D-Pro-Phe-Leu-NMe <sub>2</sub> ( <b>32a</b> )                 |                                                             |              |                                                         |              |                                                       |              |                                                                  |              |
| Boc-Dmaa-D-Pro-Phe-Leu-NMe <sub>2</sub> ( <b>32b</b> )                 |                                                             |              |                                                         |              |                                                       |              |                                                                  |              |
| Boc-Dmaa-D-Pro-Gly-Leu-OMe ( <b>33a</b> )                              | 3.037                                                       | 169          |                                                         |              |                                                       |              | 2.884                                                            | 164          |
| Boc-Dmaa-D-Pro-Gly-Leu-OMe ( <b>33b</b> )                              | 2.978                                                       | 163          |                                                         |              |                                                       |              | 2.931                                                            | 159          |
| Boc-Keto-D-Pro-Aib-Phe-OMe ( <b>34</b> )                               | 2.955                                                       | 161          | 2.938                                                   | 143          | 3.139                                                 | 83           |                                                                  |              |
| Boc-Phe-Pro-Aib-( <i>R</i> )- $\alpha$ -Mba ( <b>35</b> )              | 3.038                                                       | 150          |                                                         |              | 3.153                                                 | 94           |                                                                  |              |
| 2-Msa-Pro-D-Val-( <i>R</i> )- $\alpha$ -Mba ( <b>36</b> )              | 2.996                                                       | 151          |                                                         |              | 3.396                                                 | 108          |                                                                  |              |
| Boc-His( $\tau$ -Bn)-Pro-Aib-( <i>R</i> )- $\alpha$ -Mba ( <b>37</b> ) | 3.129                                                       | 166          |                                                         |              |                                                       |              | 3.074                                                            | 166          |
| <b>average</b>                                                         | 2.992                                                       | 161          | 2.986                                                   | 162          | 3.196                                                 | 86           | 3.055                                                            | 158          |
| <b>st. dev.</b>                                                        | 0.092                                                       | 7            | 0.148                                                   | 9            | 0.098                                                 | 11           | 0.155                                                            | 9            |
| <b>median</b>                                                          | 2.995                                                       | 162          | 2.942                                                   | 163          | 3.210                                                 | 84           | 3.005                                                            | 159          |
| <b>minimum</b>                                                         | 2.804                                                       | 146          | 2.805                                                   | 137          | 2.970                                                 | 64           | 2.871                                                            | 127          |
| <b>maximum</b>                                                         | 3.192                                                       | 174          | 3.274                                                   | 175          | 3.396                                                 | 108          | 3.358                                                            | 170          |
| <b>count</b>                                                           | 51                                                          | 51           | 22                                                      | 22           | 38                                                    | 38           | 21                                                               | 21           |

**Table S4.40:** Distribution of H-Bond Lengths ( $r$ ) & Angles ( $\theta$ ) Across All Peptides

| $r$ (N•••O) (Å) |       | $\theta$ (N-H•••O) (°) |       |
|-----------------|-------|------------------------|-------|
| Bins            | Count | Bins                   | Count |
| 2.40–2.79       | 0     | 120–124                | 0     |
| 2.80–2.84       | 4     | 125–129                | 1     |
| 2.85–2.89       | 17    | 130–134                | 0     |
| 2.90–2.94       | 14    | 135–139                | 1     |
| 2.95–2.99       | 18    | 140–144                | 2     |
| 3.00–3.04       | 14    | 145–149                | 5     |
| 3.05–3.09       | 9     | 150–154                | 11    |
| 3.10–3.14       | 5     | 155–159                | 18    |
| 3.15–3.19       | 4     | 160–164                | 26    |
| 3.20–3.24       | 4     | 165–169                | 19    |
| 3.25–3.29       | 4     | 170–174                | 10    |
| 3.30–3.34       | 0     | 175–180                | 1     |
| 3.35–3.40       | 1     |                        |       |
| 3.41–4.00       | 0     |                        |       |
| <b>average</b>  | 3.005 | <b>average</b>         | 160   |
| <b>st. dev.</b> | 0.124 | <b>st. dev.</b>        | 8     |
| <b>median</b>   | 2.979 | <b>median</b>          | 162   |
| <b>minimum</b>  | 2.804 | <b>minimum</b>         | 127   |
| <b>maximum</b>  | 3.358 | <b>maximum</b>         | 175   |
| <b>count</b>    | 94    | <b>count</b>           | 94    |

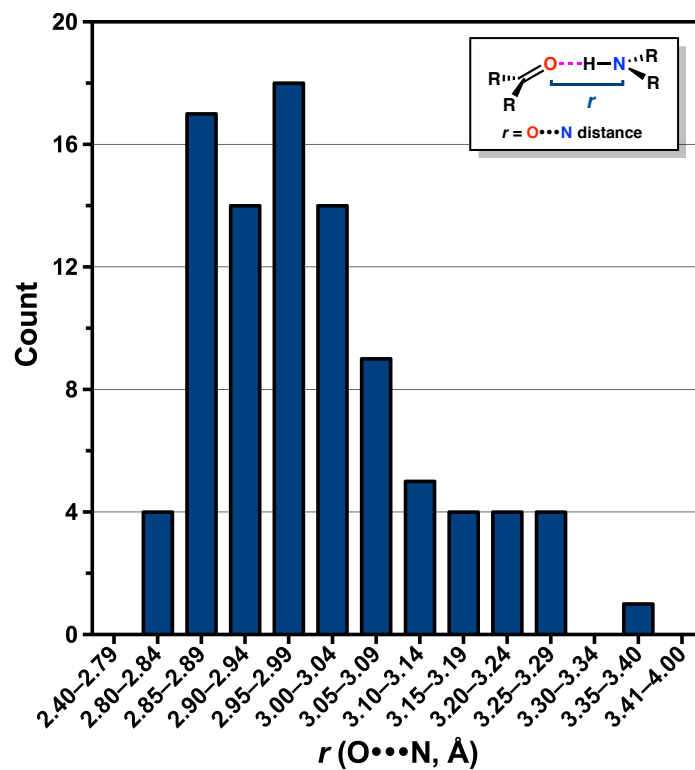

**Figure S4.14:** Histogram showing the distribution of H-bond lengths ( $r$ ) across all peptides (reproduced from Figure 11f in the manuscript).

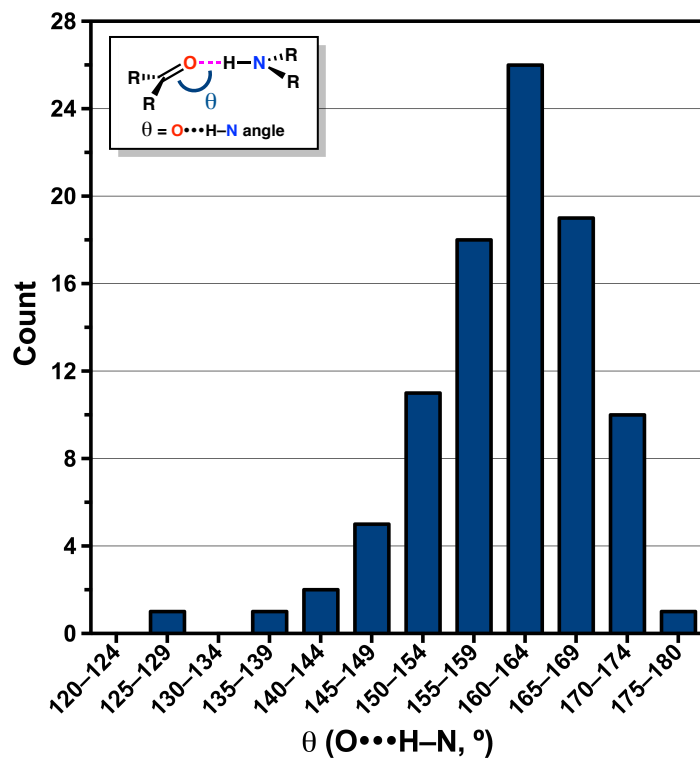

**Figure S4.15:** Histogram showing the distribution of H-bond angles ( $\theta$ ) across all peptides (reproduced from Figure 11g in the manuscript).

**Table S4.41: Intermolecular H-Bond Lengths (*r*) & Angles ( $\theta$ ) for All Peptides<sup>24</sup>**

| Peptide Sequence                                              | <i>i</i><br>N-H |              | <i>i</i> +1<br>C=O |              | <i>i</i> +2  |              |              |              |
|---------------------------------------------------------------|-----------------|--------------|--------------------|--------------|--------------|--------------|--------------|--------------|
|                                                               | <i>r</i> (Å)    | $\theta$ (°) | <i>r</i> (Å)       | $\theta$ (°) | <i>r</i> (Å) | $\theta$ (°) | <i>r</i> (Å) | $\theta$ (°) |
| Boc-Dmaa-D-Pro-Acpc-Leu-NMe <sub>2</sub> (3a)                 |                 |              | 2.765              | 152          | 2.765        | 152          |              |              |
| Boc-Dmaa-D-Pro-Acpc-Leu-NMe <sub>2</sub> (3b)                 |                 |              | 2.917              | 149          | 2.917        | 149          | 2.811        | 161          |
| Boc-Dmaa-D-Pro-Acpc-Leu-NMe <sub>2</sub> (3c)                 | 2.872           | 168          | 2.872              | 168          |              |              |              |              |
| Boc-Dmaa-D-Pro-Acpc-Leu-OMe (4a)                              | 2.857           | 163          | 2.857              | 163          |              |              |              |              |
| Boc-Dmaa-D-Pro-Acpc-Leu-OMe (4b)                              | 2.786           | 165          | 2.871              | 165          |              |              |              |              |
| Boc-Dmaa-D-Pro-Acpc-Leu-OMe (4c)                              | 2.818           | 162          | 2.805              | 160          |              |              |              |              |
| Boc-Dmaa-D-Pro-Acpc-Leu-OMe (4d)                              | 2.805           | 160          | 2.818              | 162          |              |              |              |              |
| Boc-Dmaa-D-Pro-Acpc-Leu-OMe (4e)                              | 2.871           | 165          | 2.786              | 165          |              |              |              |              |
| Boc-Cys(Ph)-D-Pro-Acpc-Leu-OMe (5)                            | 2.807           | 170          |                    |              |              |              | 2.807        | 170          |
| Boc-Leu-D-Pro-Acpc-Leu-OMe (6)                                |                 |              | 2.834              | 152          | 2.834        | 152          |              |              |
| Boc-Dmaa-D-Pro-Acpc-Gly-OMe (7a)                              | 2.951           | 166          |                    |              | 2.908        | 167          | 2.908        | 167          |
| Boc-Dmaa-D-Pro-Acpc-Gly-OMe (7b)                              | 3.067           | 165          |                    |              |              |              |              |              |
| Boc-Dmaa-D-Pro-Acpc-Nle-NMe <sub>2</sub> (8)                  |                 |              | 2.929              | 176          | 2.929        | 176          |              |              |
| Boc-Dmaa-D-Pro-Acpc-Val-NMe <sub>2</sub> (9)                  |                 |              | 2.870              | 171          | 2.87         | 171          |              |              |
| Boc-Dmaa-D-Pro-Acpc-Val-OMe (10)                              | 2.817           | 167          | 2.817              | 167          |              |              |              |              |
| Boc-Dmaa-D-Pro-Acpc-Chg-NMe <sub>2</sub> (11)                 |                 |              | 2.916              | 174          | 2.916        | 174          |              |              |
| Boc-Dmaa-D-Pro-Acpc-Phe-NMe <sub>2</sub> (12)                 |                 |              | 2.803              | 162          | 2.803        | 162          |              |              |
| Boc-Dmaa-D-Pro-Acpc-Phe-OMe (13)                              |                 |              | 2.814              | 135          | 2.814        | 135          |              |              |
| Boc-Dmaa-D-Pro-Acpc-D-Phe-NMe <sub>2</sub> (14)               |                 |              | 2.768              | 173          | 2.768        | 173          |              |              |
| Boc-Dmaa-Pro-Acpc-Leu-OMe (15)                                |                 |              |                    |              | 3.100        | 161          |              |              |
| Boc-Dmaa-D-Pro-Acbc-Leu-NMe <sub>2</sub> (16a)                |                 |              |                    |              | 3.009        | 161          | 2.847        | 167          |
| Boc-Dmaa-D-Pro-Acbc-Leu-NMe <sub>2</sub> (16b)                |                 |              |                    |              | 2.847        | 167          |              |              |
| Boc-Dmaa-D-Pro-Acbc-Leu-NMe <sub>2</sub> (16c)                | 2.840           | 166          | 2.840              | 166          |              |              |              |              |
| Boc-Dmaa-D-Pro-Acbc-Leu-OMe (17a)                             | 2.933           | 167          | 2.999              | 157          |              |              |              |              |
| Boc-Dmaa-D-Pro-Acbc-Leu-OMe (17b)                             | 2.999           | 157          | 2.933              | 167          |              |              |              |              |
| Boc-Dmaa-D-Pro-Cle-Leu-OMe (18a)                              | 2.885           | 160          | 2.915              | 158          |              |              |              |              |
| Boc-Dmaa-D-Pro-Cle-Leu-OMe (18b)                              | 2.915           | 158          | 2.885              | 160          |              |              |              |              |
| Boc-Dmaa-D-Pro-Aic-Leu-OMe (19a)                              | 2.812           | 165          | 2.812              | 165          |              |              |              |              |
| Boc-Dmaa-D-Pro-Aic-Leu-OMe (19b)                              | 2.874           | 167          | 2.874              | 167          |              |              |              |              |
| Boc-Dmaa-D-Pro-Aic-D-Phe-NMe <sub>2</sub> (20a)               |                 |              |                    |              | 2.844        | 169          | 2.844        | 169          |
| Boc-Dmaa-D-Pro-Aic-D-Phe-NMe <sub>2</sub> (20b)               |                 |              |                    |              | 2.823        | 174          | 2.823        | 174          |
| Boc-Dmaa-Pro-Aic-Leu-OMe (21a)                                |                 |              |                    |              | 2.905        | 172          | 2.905        | 172          |
| Boc-Dmaa-Pro-Aic-Leu-OMe (21b)                                |                 |              |                    |              | 2.859        | 175          | 2.859        | 175          |
| Boc-Dmaa-D-Pro-Achc-Leu-OMe (22a)                             | 2.877           | 157          | 2.887              | 157          |              |              |              |              |
| Boc-Dmaa-D-Pro-Achc-Leu-OMe (22b)                             | 2.994           | 167          | 2.994              | 167          |              |              |              |              |
| Boc-Cys(Ph)-D-Pro-Achc-Leu-OMe (23)                           | 2.844           | 171          |                    |              |              |              | 2.844        | 171          |
| Boc-Dmaa-D-Pro-Aib-Leu-NMe <sub>2</sub> (24)                  |                 |              |                    |              | 2.95         | 173          | 2.95         | 173          |
| Boc-Dmaa-D-Pro-Aib-Leu-OMe (25)                               |                 |              |                    |              | 2.837        | 174          | 2.837        | 174          |
| Boc-Dmaa-D-Pro-Aib-Val-OMe (26)                               |                 |              |                    |              | 2.853        | 171          | 2.853        | 171          |
| Boc-Dmaa-D-Pro-Aib-Phe-OMe (27)                               |                 |              | 2.917              | 170          | 2.917        | 170          |              |              |
| Boc-Dmaa-D-Pro-Aib-3-Pal-NMe <sub>2</sub> (28)                |                 |              | 2.812              | 174          | 2.877        | 174          | 2.847        | 137          |
| Boc-Dmaa-D-Pro-Aib-2-Thi-NMe <sub>2</sub> (29a)               |                 |              | 3.190              | 162          |              |              |              |              |
| Boc-Dmaa-D-Pro-Aib-2-Thi-NMe <sub>2</sub> (29b)               |                 |              |                    |              | 3.190        | 162          |              |              |
| Boc-Dmaa-Pro-Aib-Leu-OMe (30)                                 |                 |              |                    |              | 2.906        | 176          | 2.906        | 176          |
| Boc-Dmaa-D-Pro-Ala-Phe-OMe (31)                               |                 |              | 2.867              | 135          | 2.867        | 135          |              |              |
| Boc-Dmaa-D-Pro-Phe-Leu-NMe <sub>2</sub> (32a)                 |                 |              |                    |              |              |              |              |              |
| Boc-Dmaa-D-Pro-Phe-Leu-NMe <sub>2</sub> (32b)                 |                 |              |                    |              |              |              |              |              |
| Boc-Dmaa-D-Pro-Gly-Leu-OMe (33a)                              | 2.939           | 158          | 2.873              | 160          |              |              |              |              |
| Boc-Dmaa-D-Pro-Gly-Leu-OMe (33b)                              | 2.873           | 160          | 2.939              | 158          |              |              |              |              |
| Boc-Keto-D-Pro-Aib-Phe-OMe (34)                               |                 |              |                    |              | 2.797        | 168          | 2.797        | 168          |
| Boc-Phe-Pro-Aib-( <i>R</i> )- $\alpha$ -Mba (35)              |                 |              | 3.036              | 164          | 3.036        | 164          |              |              |
| 2-Msa-Pro-D-Val-( <i>R</i> )- $\alpha$ -Mba (36)              |                 |              | 2.655              | 172          | 2.904        | 167          | 2.904        | 167          |
| Boc-His( $\tau$ -Bn)-Pro-Aib-( <i>R</i> )- $\alpha$ -Mba (37) | 2.975           | 130          | 2.975              | 130          |              |              |              |              |
| <b>average</b>                                                | 2.887           | 162          | 2.878              | 161          | 2.894        | 165          | 2.859        | 168          |
| <b>st. dev.</b>                                               | 0.073           | 8            | 0.094              | 11           | 0.096        | 11           | 0.044        | 9            |
| <b>median</b>                                                 | 2.873           | 165          | 2.872              | 164          | 2.874        | 169          | 2.847        | 171          |
| <b>minimum</b>                                                | 2.786           | 130          | 2.655              | 130          | 2.765        | 135          | 2.797        | 137          |
| <b>maximum</b>                                                | 3.067           | 171          | 3.190              | 176          | 3.190        | 176          | 2.950        | 176          |
| <b>count</b>                                                  | 23              | 23           | 34                 | 34           | 28           | 28           | 16           | 16           |

**Table S4.42:** Distribution of Intermolecular H-Bond Lengths ( $r$ ) & Angles ( $\theta$ ) Across All Peptides

| $r$ (N...O) (Å) |       | $\theta$ (N-H...O) (°) |       |
|-----------------|-------|------------------------|-------|
| Bins            | Count | Bins                   | Count |
| 2.40–2.79       | 9     | 120–124                | 0     |
| 2.80–2.84       | 31    | 125–129                | 0     |
| 2.85–2.89       | 23    | 130–134                | 2     |
| 2.90–2.94       | 22    | 135–139                | 5     |
| 2.95–2.99       | 10    | 140–144                | 1     |
| 3.00–3.04       | 5     | 145–149                | 2     |
| 3.05–3.09       | 2     | 150–154                | 4     |
| 3.10–3.14       | 2     | 155–159                | 8     |
| 3.15–3.19       | 2     | 160–164                | 21    |
| 3.20–3.24       | 0     | 165–169                | 32    |
| 3.25–3.29       | 0     | 170–174                | 25    |
| 3.30–3.34       | 0     | 175–180                | 6     |
| 3.35–3.40       | 0     |                        |       |
| 3.41–4.00       | 0     |                        |       |
| <b>average</b>  | 2.888 | <b>average</b>         | 163   |
| <b>st. dev.</b> | 0.088 | <b>st. dev.</b>        | 10    |
| <b>median</b>   | 2.872 | <b>median</b>          | 166   |
| <b>minimum</b>  | 2.655 | <b>minimum</b>         | 130   |
| <b>maximum</b>  | 3.190 | <b>maximum</b>         | 176   |
| <b>count</b>    | 106   | <b>count</b>           | 106   |

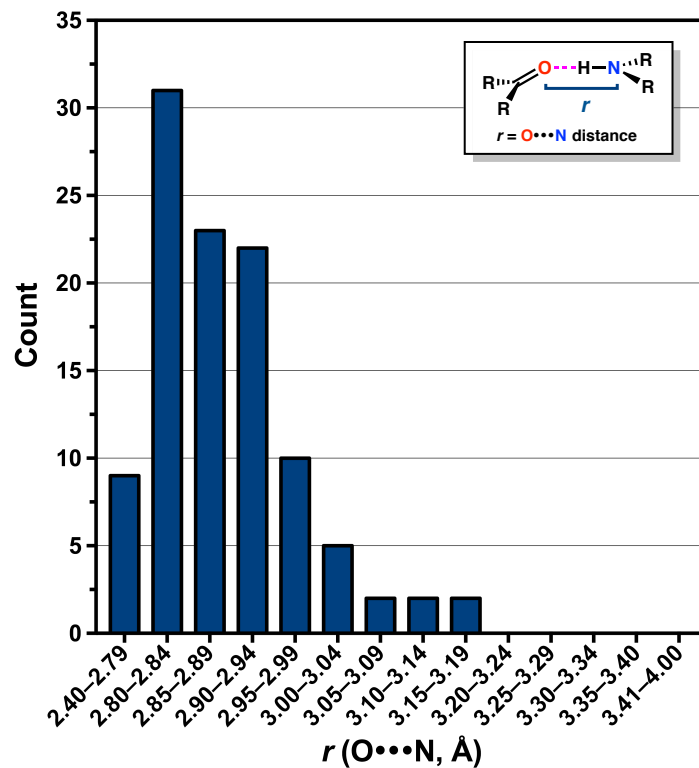

**Figure S4.16:** Histogram showing the distribution of intermolecular H-bond lengths ( $r$ ) across all peptides.

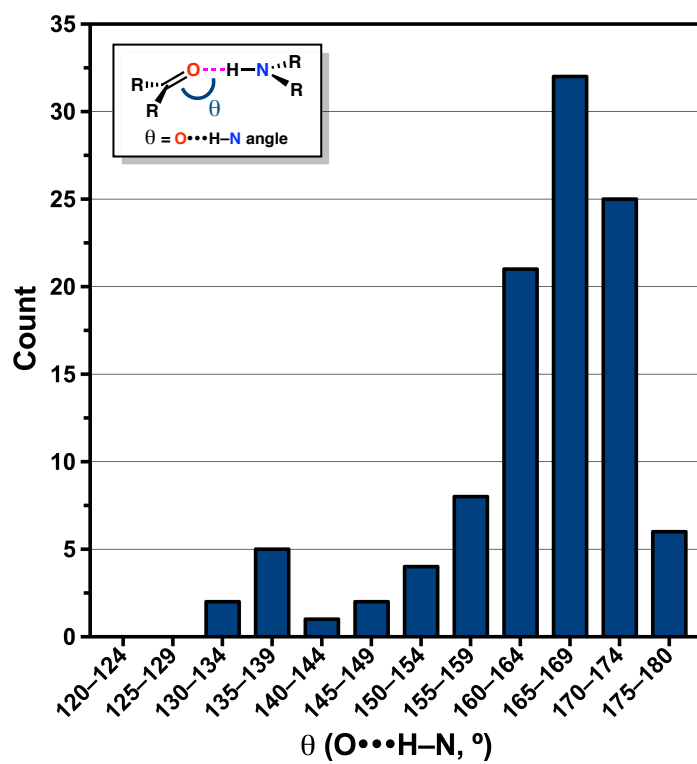

**Figure S4.17:** Histogram showing the distribution of intermolecular H-bond angles ( $\theta$ ) across all peptides.

**Table S4.43:** Summary of Intermolecular H-Bonds Donated From/Accepted to Various Positions Across the Canonical Turn Motifs

| Turn Motif | donating H-bonds from<br>N-H ( <i>i</i> ) |        | accepting H-bonds to<br>NMe <sub>2</sub> ( <i>i</i> ) |      | accepting H-bonds to<br>C=O ( <i>i</i> +1) |       | donating H-bonds from<br>N-H ( <i>i</i> +2) |      | accepting H-bonds to<br>C=O ( <i>i</i> +2) |      |
|------------|-------------------------------------------|--------|-------------------------------------------------------|------|--------------------------------------------|-------|---------------------------------------------|------|--------------------------------------------|------|
|            | types II/II'                              | 1      | 3.4%                                                  | 4    | 13.8%                                      | 16    | 55.2%                                       | 28   | 96.6%                                      | 14   |
| types I/I' | 22                                        | 100.0% | 1                                                     | 4.5% | 19                                         | 86.4% | 0                                           | 0.0% | 2                                          | 9.1% |

## E. Turn-Stabilizing $n \rightarrow \pi^*$ Stereoelectronic Effect<sup>25</sup>

**Table S4.44:** Summary of  $n \rightarrow \pi^*$  Geometry in All peptides

| Peptide Sequence                                                       | $n \rightarrow \pi^*_{C=O} (i+1)$ |              | $r_{C=O}$ (Å) | $\Delta_c$ (Å) |
|------------------------------------------------------------------------|-----------------------------------|--------------|---------------|----------------|
|                                                                        | $r$ (Å)                           | $\theta$ (°) |               |                |
| Boc-Dmaa-D-Pro-Acpc-Leu-NMe <sub>2</sub> ( <b>3a</b> )                 | 2.959                             | 121.0        | 1.225         | 0.007          |
| Boc-Dmaa-D-Pro-Acpc-Leu-NMe <sub>2</sub> ( <b>3b</b> )                 | 2.844                             | 100.9        | 1.232         | 0.002          |
| Boc-Dmaa-D-Pro-Acpc-Leu-NMe <sub>2</sub> ( <b>3c</b> )                 | 2.992                             | 126.0        | 1.232         | 0.014          |
| Boc-Dmaa-D-Pro-Acpc-Leu-OMe ( <b>4a</b> )                              | 2.940                             | 124.8        | 1.228         | 0.017          |
| Boc-Dmaa-D-Pro-Acpc-Leu-OMe ( <b>4b</b> )                              | 2.895                             | 121.6        | 1.232         | 0.024          |
| Boc-Dmaa-D-Pro-Acpc-Leu-OMe ( <b>4c</b> )                              | 2.949                             | 128.3        | 1.225         | 0.015          |
| Boc-Dmaa-D-Pro-Acpc-Leu-OMe ( <b>4d</b> )                              | 2.900                             | 123.4        | 1.230         | 0.000          |
| Boc-Dmaa-D-Pro-Acpc-Leu-OMe ( <b>4e</b> )                              | 2.947                             | 128.0        | 1.227         | 0.014          |
| Boc-Cys(Ph)-D-Pro-Acpc-Leu-OMe ( <b>5</b> )                            | 3.045                             | 126.7        | 1.223         | 0.016          |
| Boc-Leu-D-Pro-Acpc-Leu-OMe ( <b>6</b> )                                | 2.790                             | 98.4         | 1.226         | 0.015          |
| Boc-Dmaa-D-Pro-Acpc-Gly-OMe ( <b>7a</b> )                              | 2.955                             | 116.4        | 1.222         | 0.000          |
| Boc-Dmaa-D-Pro-Acpc-Gly-OMe ( <b>7b</b> )                              | 3.018                             | 122.5        | 1.209         | 0.007          |
| Boc-Dmaa-D-Pro-Acpc-Nle-NMe <sub>2</sub> ( <b>8</b> )                  | 2.903                             | 108.8        | 1.228         | 0.001          |
| Boc-Dmaa-D-Pro-Acpc-Val-NMe <sub>2</sub> ( <b>9</b> )                  | 2.827                             | 105.6        | 1.232         | 0.005          |
| Boc-Dmaa-D-Pro-Acpc-Val-OMe ( <b>10</b> )                              | 2.979                             | 126.8        | 1.231         | 0.002          |
| Boc-Dmaa-D-Pro-Acpc-Chg-NMe <sub>2</sub> ( <b>11</b> )                 | 2.888                             | 109.2        | 1.229         | 0.001          |
| Boc-Dmaa-D-Pro-Acpc-Phe-NMe <sub>2</sub> ( <b>12</b> )                 | 2.927                             | 111.7        | 1.232         | 0.000          |
| Boc-Dmaa-D-Pro-Acpc-Phe-OMe ( <b>13</b> )                              | 2.814                             | 100.9        | 1.229         | 0.012          |
| Boc-Dmaa-D-Pro-Acpc-D-Phe-NMe <sub>2</sub> ( <b>14</b> )               | 2.732                             | 99.4         | 1.240         | 0.012          |
| Boc-Dmaa-Pro-Acpc-Leu-OMe ( <b>15</b> )                                | 2.716                             | 99.5         | 1.222         | 0.007          |
| Boc-Dmaa-D-Pro-Acpc-Leu-NMe <sub>2</sub> ( <b>16a</b> )                | 2.983                             | 112.0        | 1.228         | 0.006          |
| Boc-Dmaa-D-Pro-Acpc-Leu-NMe <sub>2</sub> ( <b>16b</b> )                | 2.965                             | 122.6        | 1.214         | 0.007          |
| Boc-Dmaa-D-Pro-Acpc-Leu-NMe <sub>2</sub> ( <b>16c</b> )                | 3.006                             | 126.9        | 1.229         | 0.017          |
| Boc-Dmaa-D-Pro-Acpc-Leu-OMe ( <b>17a</b> )                             | 2.966                             | 128.2        | 1.226         | 0.019          |
| Boc-Dmaa-D-Pro-Acpc-Leu-OMe ( <b>17b</b> )                             | 2.950                             | 125.0        | 1.233         | 0.023          |
| Boc-Dmaa-D-Pro-Cle-Leu-OMe ( <b>18a</b> )                              | 2.971                             | 123.7        | 1.237         | 0.017          |
| Boc-Dmaa-D-Pro-Cle-Leu-OMe ( <b>18b</b> )                              | 2.915                             | 124.9        | 1.234         | 0.023          |
| Boc-Dmaa-D-Pro-Aic-Leu-OMe ( <b>19a</b> )                              | 2.874                             | 114.6        | 1.228         | 0.006          |
| Boc-Dmaa-D-Pro-Aic-Leu-OMe ( <b>19b</b> )                              | 2.988                             | 122.2        | 1.231         | 0.017          |
| Boc-Dmaa-D-Pro-Aic-D-Phe-NMe <sub>2</sub> ( <b>20a</b> )               | 2.772                             | 100.3        | 1.220         | 0.001          |
| Boc-Dmaa-D-Pro-Aic-D-Phe-NMe <sub>2</sub> ( <b>20b</b> )               | 2.797                             | 103.6        | 1.225         | 0.022          |
| Boc-Dmaa-Pro-Aic-Leu-OMe ( <b>21a</b> )                                | 2.743                             | 97.6         | 1.224         | 0.010          |
| Boc-Dmaa-Pro-Aic-Leu-OMe ( <b>21b</b> )                                | 2.778                             | 98.2         | 1.227         | 0.008          |
| Boc-Dmaa-D-Pro-Achc-Leu-OMe ( <b>22a</b> )                             | 3.048                             | 126.9        | 1.231         | 0.004          |
| Boc-Dmaa-D-Pro-Achc-Leu-OMe ( <b>22b</b> )                             | 2.917                             | 126.7        | 1.228         | 0.015          |
| Boc-Cys(Ph)-D-Pro-Achc-Leu-OMe ( <b>23</b> )                           | 3.185                             | 132.3        | 1.226         | 0.013          |
| Boc-Dmaa-D-Pro-Aib-Leu-NMe <sub>2</sub> ( <b>24</b> )                  | 2.821                             | 106.0        | 1.225         | 0.007          |
| Boc-Dmaa-D-Pro-Aib-Leu-OMe ( <b>25</b> )                               | 2.845                             | 101.3        | 1.224         | 0.002          |
| Boc-Dmaa-D-Pro-Aib-Val-OMe ( <b>26</b> )                               | 2.884                             | 105.1        | 1.222         | 0.000          |
| Boc-Dmaa-D-Pro-Aib-Phe-OMe ( <b>27</b> )                               | 2.820                             | 105.5        | 1.234         | 0.012          |
| Boc-Dmaa-D-Pro-Aib-3-Pal-NMe <sub>2</sub> ( <b>28</b> )                | 2.733                             | 102.2        | 1.236         | 0.011          |
| Boc-Dmaa-D-Pro-Aib-2-Thi-NMe <sub>2</sub> ( <b>29a</b> )               | 2.879                             | 107.1        | 1.229         | 0.012          |
| Boc-Dmaa-D-Pro-Aib-2-Thi-NMe <sub>2</sub> ( <b>29b</b> )               | 2.865                             | 106.4        | 1.230         | 0.003          |
| Boc-Dmaa-Pro-Aib-Leu-OMe ( <b>30</b> )                                 | 2.782                             | 97.7         | 1.223         | 0.005          |
| Boc-Dmaa-D-Pro-Ala-Phe-OMe ( <b>31</b> )                               | 2.822                             | 100.1        | 1.233         | 0.013          |
| Boc-Dmaa-D-Pro-Phe-Leu-NMe <sub>2</sub> ( <b>32a</b> )                 | N/A                               | N/A          | 1.218         | N/A            |
| Boc-Dmaa-D-Pro-Phe-Leu-NMe <sub>2</sub> ( <b>32b</b> )                 | N/A                               | N/A          | 1.238         | N/A            |
| Boc-Dmaa-D-Pro-Gly-Leu-OMe ( <b>33a</b> )                              | 2.972                             | 124.5        | 1.226         | 0.015          |
| Boc-Dmaa-D-Pro-Gly-Leu-OMe ( <b>33b</b> )                              | 2.995                             | 125.2        | 1.235         | 0.007          |
| Boc-Keto-D-Pro-Aib-Phe-OMe ( <b>34</b> )                               | 2.895                             | 111.4        | 1.217         | 0.004          |
| Boc-Phe-Pro-Aib-( <i>R</i> )- $\alpha$ -Mba ( <b>35</b> )              | 2.758                             | 101.3        | 1.236         | 0.019          |
| 2-Msa-Pro-D-Val-( <i>R</i> )- $\alpha$ -Mba ( <b>36</b> )              | 2.802                             | 100.6        | 1.243         | 0.012          |
| Boc-His( $\tau$ -Bn)-Pro-Aib-( <i>R</i> )- $\alpha$ -Mba ( <b>37</b> ) | 2.805                             | 114.2        | 1.221         | 0.033          |
| <b>average</b>                                                         | 2.893                             | 113.6        | 1.228         | 0.010          |
| <b>st. dev.</b>                                                        | 0.098                             | 11.3         | 0.006         | 0.008          |
| <b>median</b>                                                          | 2.895                             | 112.0        | 1.228         | 0.011          |
| <b>minimum</b>                                                         | 2.716                             | 97.6         | 1.209         | 0.000          |
| <b>maximum</b>                                                         | 3.185                             | 132.3        | 1.243         | 0.033          |
| <b>count</b>                                                           | 51                                | 51           | 53            | 51             |

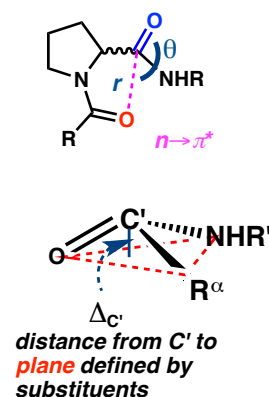



**Table S4.45:**  $n \rightarrow \pi^*$  Geometry in Type II  $\beta$ -Turns

| Type II $\beta$ -Turns                           | $n_o \rightarrow \pi^*_{c=O} (i+1)$ |              | $r_{c=O}$ (Å) | $\Delta_c$ (Å) | Pro<br>C $\gamma$ -Pucker |
|--------------------------------------------------|-------------------------------------|--------------|---------------|----------------|---------------------------|
|                                                  | $r$ (Å)                             | $\theta$ (°) |               |                |                           |
| Boc-Dmaa-Pro-Acpc-Leu-OMe (15)                   | 2.716                               | 99.5         | 1.222         | 0.007          | exo                       |
| Boc-Dmaa-Pro-Aic-Leu-OMe (21a)                   | 2.743                               | 97.6         | 1.224         | 0.010          | exo                       |
| Boc-Dmaa-Pro-Aic-Leu-OMe (21b)                   | 2.778                               | 98.2         | 1.227         | 0.008          | exo                       |
| Boc-Dmaa-Pro-Aib-Leu-OMe (30)                    | 2.782                               | 97.7         | 1.223         | 0.005          | exo                       |
| Boc-Phe-Pro-Aib-( <i>R</i> )- $\alpha$ -Mba (35) | 2.758                               | 101.3        | 1.236         | 0.019          | exo                       |
| 2-Msa-Pro-D-Val-( <i>R</i> )- $\alpha$ -Mba (36) | 2.802                               | 100.6        | 1.243         | 0.012          | endo                      |
| <b>average</b>                                   | 2.763                               | 99.2         | 1.229         | 0.010          | <b>endo count</b>         |
| <b>st. dev.</b>                                  | 0.031                               | 1.6          | 0.008         | 0.005          | 1                         |
| <b>median</b>                                    | 2.768                               | 98.9         | 1.226         | 0.009          | <b>exo count</b>          |
| <b>minimum</b>                                   | 2.716                               | 97.6         | 1.222         | 0.005          | 5                         |
| <b>maximum</b>                                   | 2.802                               | 101.3        | 1.243         | 0.019          | <b>total</b>              |
| <b>count</b>                                     | 6                                   | 6            | 6             | 6              | 6                         |

**Table S4.46:**  $n \rightarrow \pi^*$  Geometry in Type II'  $\beta$ -Turns

| Type II' $\beta$ -Turns                         | $n_o \rightarrow \pi^*_{c=O} (i+1)$ |              | $r_{c=O}$ (Å) | $\Delta_c$ (Å) | Pro<br>C $\gamma$ -Pucker |
|-------------------------------------------------|-------------------------------------|--------------|---------------|----------------|---------------------------|
|                                                 | $r$ (Å)                             | $\theta$ (°) |               |                |                           |
| Boc-Dmaa-D-Pro-Acpc-Leu-NMe <sub>2</sub> (3a)   | 2.959                               | 121.0        | 1.225         | 0.007          | endo                      |
| Boc-Dmaa-D-Pro-Acpc-Leu-NMe <sub>2</sub> (3b)   | 2.844                               | 100.9        | 1.232         | 0.002          | exo                       |
| Boc-Leu-D-Pro-Acpc-Leu-OMe (6)                  | 2.790                               | 98.4         | 1.226         | 0.015          | endo                      |
| Boc-Dmaa-D-Pro-Acpc-Gly-OMe (7a)                | 2.955                               | 116.4        | 1.222         | 0.000          | exo                       |
| Boc-Dmaa-D-Pro-Acpc-Nle-NMe <sub>2</sub> (8)    | 2.903                               | 108.8        | 1.228         | 0.001          | exo                       |
| Boc-Dmaa-D-Pro-Acpc-Val-NMe <sub>2</sub> (9)    | 2.927                               | 111.7        | 1.232         | 0.000          | exo                       |
| Boc-Dmaa-D-Pro-Acpc-Chg-NMe <sub>2</sub> (11)   | 2.888                               | 109.2        | 1.229         | 0.001          | exo                       |
| Boc-Dmaa-D-Pro-Acpc-Phe-NMe <sub>2</sub> (12)   | 2.927                               | 111.7        | 1.232         | 0.000          | exo                       |
| Boc-Dmaa-D-Pro-Acpc-Phe-OMe (13)                | 2.814                               | 100.9        | 1.229         | 0.012          | exo                       |
| Boc-Dmaa-D-Pro-Acpc-D-Phe-NMe <sub>2</sub> (14) | 2.732                               | 99.4         | 1.240         | 0.012          | endo                      |
| Boc-Dmaa-D-Pro-Acpc-Leu-NMe <sub>2</sub> (16a)  | 2.983                               | 112.0        | 1.228         | 0.006          | exo                       |
| Boc-Dmaa-D-Pro-Acpc-Leu-NMe <sub>2</sub> (16b)  | 2.965                               | 122.6        | 1.214         | 0.007          | endo                      |
| Boc-Dmaa-D-Pro-Aic-D-Phe-NMe <sub>2</sub> (20a) | 2.772                               | 100.3        | 1.220         | 0.001          | exo                       |
| Boc-Dmaa-D-Pro-Aic-D-Phe-NMe <sub>2</sub> (20b) | 2.797                               | 103.6        | 1.225         | 0.022          | endo                      |
| Boc-Dmaa-D-Pro-Aib-Leu-NMe <sub>2</sub> (24)    | 2.821                               | 106.0        | 1.225         | 0.007          | exo                       |
| Boc-Dmaa-D-Pro-Aib-Leu-OMe (25)                 | 2.845                               | 101.3        | 1.224         | 0.002          | exo                       |
| Boc-Dmaa-D-Pro-Aib-Val-OMe (26)                 | 2.884                               | 105.1        | 1.222         | 0.000          | exo                       |
| Boc-Dmaa-D-Pro-Aib-Phe-OMe (27)                 | 2.820                               | 105.5        | 1.234         | 0.012          | endo                      |
| Boc-Dmaa-D-Pro-Aib-3-Pal-NMe <sub>2</sub> (28)  | 2.733                               | 102.2        | 1.236         | 0.011          | endo                      |
| Boc-Dmaa-D-Pro-Aib-2-Thi-NMe <sub>2</sub> (29a) | 2.879                               | 107.1        | 1.229         | 0.012          | exo                       |
| Boc-Dmaa-D-Pro-Aib-2-Thi-NMe <sub>2</sub> (29b) | 2.865                               | 106.4        | 1.230         | 0.003          | exo                       |
| Boc-Dmaa-D-Pro-Ala-Phe-OMe (31)                 | 2.822                               | 100.1        | 1.233         | 0.013          | exo                       |
| Boc-Keto-D-Pro-Aib-Phe-OMe (34)                 | 2.895                               | 111.4        | 1.217         | 0.004          | endo                      |
| <b>average</b>                                  | 2.862                               | 107.0        | 1.227         | 0.007          | <b>endo count</b>         |
| <b>st. dev.</b>                                 | 0.072                               | 6.7          | 0.006         | 0.006          | 8                         |
| <b>median</b>                                   | 2.865                               | 106.0        | 1.228         | 0.006          | <b>exo count</b>          |
| <b>minimum</b>                                  | 2.732                               | 98.4         | 1.214         | 0.000          | 15                        |
| <b>maximum</b>                                  | 2.983                               | 122.6        | 1.240         | 0.022          | <b>total</b>              |
| <b>count</b>                                    | 23                                  | 23           | 23            | 23             | 23                        |

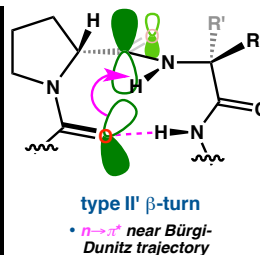

**Table S4.47:**  $n \rightarrow \pi^*$  Geometry in Type I'  $\beta$ -Turns

| Type I' $\beta$ -Turns                                  | $n \rightarrow \pi^*_{C=O} (i+1)$ |              | $r_{C=O}$ (Å) | $\Delta_c$ (Å) | Pro<br>C $\gamma$ -Pucker |
|---------------------------------------------------------|-----------------------------------|--------------|---------------|----------------|---------------------------|
|                                                         | $r$ (Å)                           | $\theta$ (°) |               |                |                           |
| Boc-Dmaa-D-Pro-Acpc-Leu-NMe <sub>2</sub> ( <b>3c</b> )  | 2.992                             | 126.0        | 1.232         | 0.014          | endo                      |
| Boc-Dmaa-D-Pro-Acpc-Leu-OMe ( <b>4a</b> )               | 2.940                             | 124.8        | 1.228         | 0.017          | endo                      |
| Boc-Dmaa-D-Pro-Acpc-Leu-OMe ( <b>4b</b> )               | 2.895                             | 121.6        | 1.232         | 0.024          | endo                      |
| Boc-Dmaa-D-Pro-Acpc-Leu-OMe ( <b>4c</b> )               | 2.949                             | 128.3        | 1.225         | 0.015          | endo                      |
| Boc-Dmaa-D-Pro-Acpc-Leu-OMe ( <b>4d</b> )               | 2.900                             | 123.4        | 1.230         | 0.000          | endo                      |
| Boc-Dmaa-D-Pro-Acpc-Leu-OMe ( <b>4e</b> )               | 2.947                             | 128.0        | 1.227         | 0.014          | endo                      |
| Boc-Cys(Ph)-D-Pro-Acpc-Leu-OMe ( <b>5</b> )             | 3.045                             | 126.7        | 1.223         | 0.016          | exo                       |
| Boc-Dmaa-D-Pro-Acpc-Gly-OMe ( <b>7b</b> )               | 3.018                             | 122.5        | 1.209         | 0.007          | exo                       |
| Boc-Dmaa-D-Pro-Acpc-Val-OMe ( <b>10</b> )               | 2.979                             | 126.8        | 1.231         | 0.002          | endo                      |
| Boc-Dmaa-D-Pro-Acbc-Leu-NMe <sub>2</sub> ( <b>16c</b> ) | 3.006                             | 126.9        | 1.229         | 0.017          | endo                      |
| Boc-Dmaa-D-Pro-Acbc-Leu-OMe ( <b>17a</b> )              | 2.966                             | 128.2        | 1.226         | 0.019          | endo                      |
| Boc-Dmaa-D-Pro-Acbc-Leu-OMe ( <b>17b</b> )              | 2.950                             | 125.0        | 1.233         | 0.023          | exo                       |
| Boc-Dmaa-D-Pro-Cle-Leu-OMe ( <b>18a</b> )               | 2.971                             | 123.7        | 1.237         | 0.017          | exo                       |
| Boc-Dmaa-D-Pro-Cle-Leu-OMe ( <b>18b</b> )               | 2.915                             | 124.9        | 1.234         | 0.023          | endo                      |
| Boc-Dmaa-D-Pro-Aic-Leu-OMe ( <b>19a</b> )               | 2.874                             | 114.6        | 1.228         | 0.006          | exo                       |
| Boc-Dmaa-D-Pro-Aic-Leu-OMe ( <b>19b</b> )               | 2.988                             | 122.2        | 1.231         | 0.017          | endo                      |
| Boc-Dmaa-D-Pro-Achc-Leu-OMe ( <b>22a</b> )              | 3.048                             | 126.9        | 1.231         | 0.004          | endo                      |
| Boc-Dmaa-D-Pro-Achc-Leu-OMe ( <b>22b</b> )              | 2.917                             | 126.7        | 1.228         | 0.015          | exo                       |
| Boc-Cys(Ph)-D-Pro-Achc-Leu-OMe ( <b>23</b> )            | 3.185                             | 132.3        | 1.226         | 0.013          | exo                       |
| Boc-Dmaa-D-Pro-Gly-Leu-OMe ( <b>33a</b> )               | 2.972                             | 124.5        | 1.226         | 0.015          | endo                      |
| Boc-Dmaa-D-Pro-Gly-Leu-OMe ( <b>33b</b> )               | 2.995                             | 125.2        | 1.235         | 0.007          | exo                       |
| <b>average</b>                                          | 2.974                             | 125.2        | 1.229         | 0.014          | <b>endo count</b>         |
| <b>st. dev.</b>                                         | 0.067                             | 3.5          | 0.006         | 0.007          | 13                        |
| <b>median</b>                                           | 2.971                             | 125.2        | 1.229         | 0.015          | <b>exo count</b>          |
| <b>minimum</b>                                          | 2.874                             | 114.6        | 1.209         | 0.000          | 8                         |
| <b>maximum</b>                                          | 3.185                             | 132.3        | 1.237         | 0.024          | <b>total</b>              |
| <b>count</b>                                            | 21                                | 21           | 21            | 21             | 21                        |

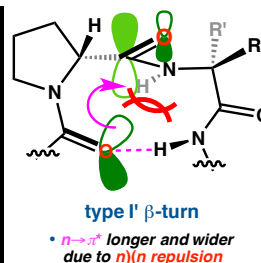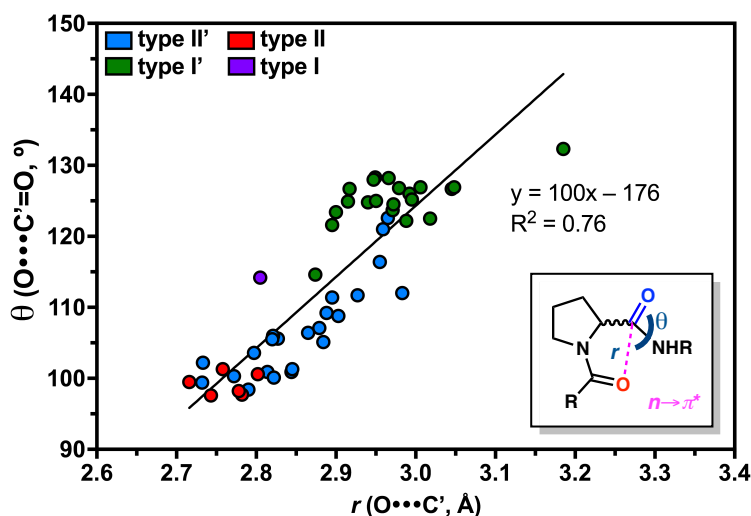

**Figure S4.18:** A plot of O...C'=O angle vs. O...C' distance shows a loose correlation, as well as clustering by canonical turn types (reproduced from Figure 11j in the manuscript).

## F. Amide N-Pyramidalization ( $\Delta_N$ )<sup>26</sup>

**Table S4.48:** Amide Pyramidalization ( $\Delta_N$ ) Across All Peptides

| Peptide Sequence                                                       | $\Delta_N(i)$ | $\Delta_N(i+1)$ | $\Delta_N(i+2)$ | $\Delta_N(i+3)$ | $\Delta_N(\text{Dmaa})$ |
|------------------------------------------------------------------------|---------------|-----------------|-----------------|-----------------|-------------------------|
| Boc-Dmaa-D-Pro-Acpc-Leu-NMe <sub>2</sub> ( <b>3a</b> )                 | 0.059         | 0.064           | 0.043           | 0.096           | 0.438                   |
| Boc-Dmaa-D-Pro-Acpc-Leu-NMe <sub>2</sub> ( <b>3b</b> )                 | 0.028         | 0.055           | 0.123           | 0.077           | 0.462                   |
| Boc-Dmaa-D-Pro-Acpc-Leu-NMe <sub>2</sub> ( <b>3c</b> )                 | 0.032         | 0.076           | 0.108           | 0.041           | 0.456                   |
| Boc-Dmaa-D-Pro-Acpc-Leu-OMe ( <b>4a</b> )                              | 0.000         | 0.065           | 0.000           | 0.000           | 0.456                   |
| Boc-Dmaa-D-Pro-Acpc-Leu-OMe ( <b>4b</b> )                              | 0.012         | 0.052           | 0.125           | 0.034           | 0.455                   |
| Boc-Dmaa-D-Pro-Acpc-Leu-OMe ( <b>4c</b> )                              | 0.027         | 0.093           | 0.133           | 0.000           | 0.457                   |
| Boc-Dmaa-D-Pro-Acpc-Leu-OMe ( <b>4d</b> )                              | 0.090         | 0.068           | 0.116           | 0.045           | 0.468                   |
| Boc-Dmaa-D-Pro-Acpc-Leu-OMe ( <b>4e</b> )                              | 0.074         | 0.079           | 0.105           | 0.006           | 0.473                   |
| Boc-Cys(Ph)-D-Pro-Acpc-Leu-OMe ( <b>5</b> )                            | 0.008         | 0.018           | 0.054           | 0.011           |                         |
| Boc-Leu-D-Pro-Acpc-Leu-OMe ( <b>6</b> )                                | 0.002         | 0.016           | 0.063           | 0.061           |                         |
| Boc-Dmaa-D-Pro-Acpc-Gly-OMe ( <b>7a</b> )                              | 0.003         | 0.002           | 0.098           | 0.039           | 0.461                   |
| Boc-Dmaa-D-Pro-Acpc-Gly-OMe ( <b>7b</b> )                              | 0.068         | 0.012           | 0.140           | 0.089           | 0.480                   |
| Boc-Dmaa-D-Pro-Acpc-Nle-NMe <sub>2</sub> ( <b>8</b> )                  | 0.213         | 0.082           | 0.063           | 0.017           | 0.433                   |
| Boc-Dmaa-D-Pro-Acpc-Val-NMe <sub>2</sub> ( <b>9</b> )                  | 0.258         | 0.089           | 0.061           | 0.041           | 0.414                   |
| Boc-Dmaa-D-Pro-Acpc-Val-OMe ( <b>10</b> )                              | 0.049         | 0.077           | 0.076           | 0.005           | 0.457                   |
| Boc-Dmaa-D-Pro-Acpc-Chg-NMe <sub>2</sub> ( <b>11</b> )                 | 0.261         | 0.086           | 0.061           | 0.080           | 0.418                   |
| Boc-Dmaa-D-Pro-Acpc-Phe-NMe <sub>2</sub> ( <b>12</b> )                 | 0.085         | 0.021           | 0.085           | 0.092           | 0.426                   |
| Boc-Dmaa-D-Pro-Acpc-Phe-OMe ( <b>13</b> )                              | 0.003         | 0.046           | 0.104           | 0.110           | 0.473                   |
| Boc-Dmaa-D-Pro-Acpc-D-Phe-NMe <sub>2</sub> ( <b>14</b> )               | 0.046         | 0.013           | 0.085           | 0.129           | 0.464                   |
| Boc-Dmaa-Pro-Acpc-Leu-OMe ( <b>15</b> )                                | 0.195         | 0.021           | 0.094           | 0.111           | 0.468                   |
| Boc-Dmaa-D-Pro-Acbc-Leu-NMe <sub>2</sub> ( <b>16a</b> )                | 0.088         | 0.027           | 0.012           | 0.022           | 0.453                   |
| Boc-Dmaa-D-Pro-Acbc-Leu-NMe <sub>2</sub> ( <b>16b</b> )                | 0.045         | 0.063           | 0.026           | 0.042           | 0.450                   |
| Boc-Dmaa-D-Pro-Acbc-Leu-NMe <sub>2</sub> ( <b>16c</b> )                | 0.044         | 0.080           | 0.090           | 0.082           | 0.472                   |
| Boc-Dmaa-D-Pro-Acbc-Leu-OMe ( <b>17a</b> )                             | 0.081         | 0.110           | 0.077           | 0.032           | 0.472                   |
| Boc-Dmaa-D-Pro-Acbc-Leu-OMe ( <b>17b</b> )                             | 0.135         | 0.063           | 0.060           | 0.017           | 0.473                   |
| Boc-Dmaa-D-Pro-Cle-Leu-OMe ( <b>18a</b> )                              | 0.116         | 0.116           | 0.082           | 0.027           | 0.483                   |
| Boc-Dmaa-D-Pro-Cle-Leu-OMe ( <b>18b</b> )                              | 0.125         | 0.053           | 0.081           | 0.001           | 0.473                   |
| Boc-Dmaa-D-Pro-Aic-Leu-OMe ( <b>19a</b> )                              | 0.011         | 0.074           | 0.096           | 0.084           | 0.458                   |
| Boc-Dmaa-D-Pro-Aic-Leu-OMe ( <b>19b</b> )                              | 0.160         | 0.085           | 0.102           | 0.045           | 0.455                   |
| Boc-Dmaa-D-Pro-Aic-D-Phe-NMe <sub>2</sub> ( <b>20a</b> )               | 0.044         | 0.018           | 0.014           | 0.043           | 0.472                   |
| Boc-Dmaa-D-Pro-Aic-D-Phe-NMe <sub>2</sub> ( <b>20b</b> )               | 0.059         | 0.042           | 0.026           | 0.012           | 0.510                   |
| Boc-Dmaa-Pro-Aic-Leu-OMe ( <b>21a</b> )                                | 0.121         | 0.050           | 0.020           | 0.071           | 0.389                   |
| Boc-Dmaa-Pro-Aic-Leu-OMe ( <b>21b</b> )                                | 0.121         | 0.021           | 0.011           | 0.045           | 0.368                   |
| Boc-Dmaa-D-Pro-Achc-Leu-OMe ( <b>22a</b> )                             | 0.190         | 0.134           | 0.101           | 0.055           | 0.471                   |
| Boc-Dmaa-D-Pro-Achc-Leu-OMe ( <b>22b</b> )                             | 0.134         | 0.087           | 0.082           | 0.025           | 0.480                   |
| Boc-Cys(Ph)-D-Pro-Achc-Leu-OMe ( <b>23</b> )                           | 0.114         | 0.067           | 0.106           | 0.051           |                         |
| Boc-Dmaa-D-Pro-Aib-Leu-NMe <sub>2</sub> ( <b>24</b> )                  | 0.111         | 0.019           | 0.054           | 0.001           | 0.454                   |
| Boc-Dmaa-D-Pro-Aib-Leu-OMe ( <b>25</b> )                               | 0.096         | 0.034           | 0.077           | 0.067           | 0.447                   |
| Boc-Dmaa-D-Pro-Aib-Val-OMe ( <b>26</b> )                               | 0.126         | 0.060           | 0.024           | 0.030           | 0.461                   |
| Boc-Dmaa-D-Pro-Aib-Phe-OMe ( <b>27</b> )                               | 0.041         | 0.024           | 0.046           | 0.099           | 0.427                   |
| Boc-Dmaa-D-Pro-Aib-3-Pal-NMe <sub>2</sub> ( <b>28</b> )                | 0.045         | 0.015           | 0.025           | 0.101           | 0.461                   |
| Boc-Dmaa-D-Pro-Aib-2-Thi-NMe <sub>2</sub> ( <b>29a</b> )               | 0.000         | 0.022           | 0.000           | 0.000           | 0.457                   |
| Boc-Dmaa-D-Pro-Aib-2-Thi-NMe <sub>2</sub> ( <b>29b</b> )               | 0.001         | 0.015           | 0.000           | 0.001           | 0.441                   |
| Boc-Dmaa-Pro-Aib-Leu-OMe ( <b>30</b> )                                 | 0.096         | 0.034           | 0.077           | 0.067           | 0.447                   |
| Boc-Dmaa-D-Pro-Ala-Phe-OMe ( <b>31</b> )                               | 0.019         | 0.053           | 0.086           | 0.128           | 0.475                   |
| Boc-Dmaa-D-Pro-Phe-Leu-NMe <sub>2</sub> ( <b>32a</b> )                 | 0.001         | 0.061           | 0.000           | 0.000           | 0.442                   |
| Boc-Dmaa-D-Pro-Phe-Leu-NMe <sub>2</sub> ( <b>32b</b> )                 | 0.001         | 0.087           | 0.000           | 0.000           | 0.376                   |
| Boc-Dmaa-D-Pro-Gly-Leu-OMe ( <b>33a</b> )                              | 0.123         | 0.059           | 0.128           | 0.077           | 0.433                   |
| Boc-Dmaa-D-Pro-Gly-Leu-OMe ( <b>33b</b> )                              | 0.157         | 0.023           | 0.069           | 0.041           | 0.429                   |
| Boc-Keto-D-Pro-Aib-Phe-OMe ( <b>34</b> )                               | 0.000         | 0.031           | 0.000           | 0.000           |                         |
| Boc-Phe-Pro-Aib-( <i>R</i> )- $\alpha$ -Mba ( <b>35</b> )              | 0.000         | 0.057           | 0.000           | 0.000           |                         |
| 2-Msa-Pro-D-Val-( <i>R</i> )- $\alpha$ -Mba ( <b>36</b> )              |               | 0.013           | 0.048           | 0.068           |                         |
| Boc-His( $\tau$ -Bn)-Pro-Aib-( <i>R</i> )- $\alpha$ -Mba ( <b>37</b> ) | 0.000         | 0.042           | 0.001           | 0.001           |                         |
| <b>average</b>                                                         | 0.075         | 0.052           | 0.063           | 0.046           | 0.452                   |
| <b>st. dev.</b>                                                        | 0.069         | 0.031           | 0.042           | 0.038           | 0.027                   |
| <b>median</b>                                                          | 0.059         | 0.053           | 0.069           | 0.041           | 0.457                   |
| <b>minimum</b>                                                         | 0.000         | 0.002           | 0.000           | 0.000           | 0.368                   |
| <b>maximum</b>                                                         | 0.261         | 0.134           | 0.140           | 0.129           | 0.510                   |
| <b>count</b>                                                           | 52            | 53              | 53              | 53              | 46                      |

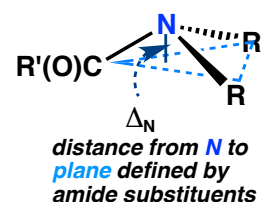

## G. Symmetry-Independent Molecules<sup>27</sup>

**Table S4.49:** RMSD Values for Symmetry-Independent Molecules

| Symmetry-Independent Conformers           | ID    | Backbone RMSD (Å) | Loop RMSD (Å)     | All Atom RMSD (Å) |
|-------------------------------------------|-------|-------------------|-------------------|-------------------|
| Boc-Dmaa-D-Pro-Acpc-Leu-NMe <sub>2</sub>  | 3a,b  | 0.43              | 0.14              | 1.45              |
| Boc-Dmaa-D-Pro-Acpc-Leu-OMe               | 4b–e  | <i>vide infra</i> | <i>vide infra</i> | <i>vide infra</i> |
| Boc-Dmaa-D-Pro-Acpc-Gly-OMe               | 7a,b  | 1.23              | 0.72              | 1.51              |
| Boc-Dmaa-D-Pro-Acbc-Leu-NMe <sub>2</sub>  | 16a,b | 0.52              | 0.11              | 1.10              |
| Boc-Dmaa-D-Pro-Acbc-Leu-OMe               | 17a,b | 0.13              | 0.03              | 0.32              |
| Boc-Dmaa-D-Pro-Cle-Leu-OMe                | 18a,b | 0.10              | 0.03              | 0.32              |
| Boc-Dmaa-D-Pro-Aic-Leu-OMe                | 19a,b | 1.04              | 0.12              | 1.87              |
| Boc-Dmaa-D-Pro-Aic-D-Phe-NMe <sub>2</sub> | 20a,b | 0.33              | 0.05              | 0.97              |
| Boc-Dmaa-Pro-Aic-Leu-OMe                  | 21a,b | 0.13              | 0.02              | 0.26              |
| Boc-Dmaa-D-Pro-Ahc-Leu-OMe                | 22a,b | 0.16              | 0.04              | 0.49              |
| Boc-Dmaa-D-Pro-Aib-2-Thi-NMe <sub>2</sub> | 29a,b | 0.11              | 0.01              | 0.21              |
| Boc-Dmaa-D-Pro-Phe-Leu-NMe <sub>2</sub>   | 32a,b | 0.37              | 0.05              | 0.78              |
| Boc-Dmaa-D-Pro-Gly-Leu-OMe                | 33a,b | 0.17              | 0.03              | 0.34              |
| <b>average</b>                            |       | 0.39              | 0.11              | 0.80              |
| <b>st. dev.</b>                           |       | 0.38              | 0.20              | 0.57              |
| <b>median</b>                             |       | 0.25              | 0.05              | 0.64              |
| <b>minimum</b>                            |       | 0.10              | 0.01              | 0.21              |
| <b>maximum</b>                            |       | 1.23              | 0.72              | 1.87              |
| <b>count</b>                              |       | 13                | 13                | 13                |

**Table S4.50:** RMSD Values for Symmetry-Independent Molecules of Peptide **4b–e** ( $Z' = 4$ )

| Boc-Dmaa-D-Pro-Acpc-Leu-OMe | Backbone RMSD (Å) | Loop RMSD (Å) | All Atom RMSD (Å) |
|-----------------------------|-------------------|---------------|-------------------|
| <b>4b/4b</b>                | N/A               | N/A           | N/A               |
| <b>4b/4c</b>                | 0.27              | 0.04          | 0.54              |
| <b>4b/4d</b>                | 0.05              | 0.01          | 0.13              |
| <b>4b/4e</b>                | 0.34              | 0.03          | 0.66              |
| <b>4c/4b</b>                | N/A               | N/A           | N/A               |
| <b>4c/4c</b>                | N/A               | N/A           | N/A               |
| <b>4c/4d</b>                | 0.32              | 0.03          | 0.64              |
| <b>4c/4e</b>                | 0.47              | 0.03          | 0.79              |
| <b>4d/4b</b>                | N/A               | N/A           | N/A               |
| <b>4d/4c</b>                | N/A               | N/A           | N/A               |
| <b>4d/4d</b>                | N/A               | N/A           | N/A               |
| <b>4d/4e</b>                | 0.34              | 0.03          | 0.67              |
| <b>4e/4b</b>                | N/A               | N/A           | N/A               |
| <b>4e/4c</b>                | N/A               | N/A           | N/A               |
| <b>4e/4d</b>                | N/A               | N/A           | N/A               |
| <b>4e/4e</b>                | N/A               | N/A           | N/A               |

## H. Turn-Type Distributions<sup>18</sup>

**Table S4.51:** Distribution of Canonical Turn Types as a Function of  $i+2$  Residue Across All Peptides (Except Unfolded **32a,b**)

| $i+2$ Residue | Type II' | Type II | Type I'    | Type I    |
|---------------|----------|---------|------------|-----------|
| Gly           | 0        | 0       | 2          | 0         |
| Ala/D-Val     | 1        | 1       | 0          | 0         |
| Aib           | 8        | 2       | 0          | 1         |
| Acpc          | 10       | 1       | 9          | 0         |
| Acbc          | 2        | 0       | 3          | 0         |
| Cle           | 0        | 0       | 2          | 0         |
| Aic           | 2        | 2       | 2          | 0         |
| Achc          | 0        | 0       | 3          | 0         |
|               |          |         | <b>Sum</b> | <b>51</b> |

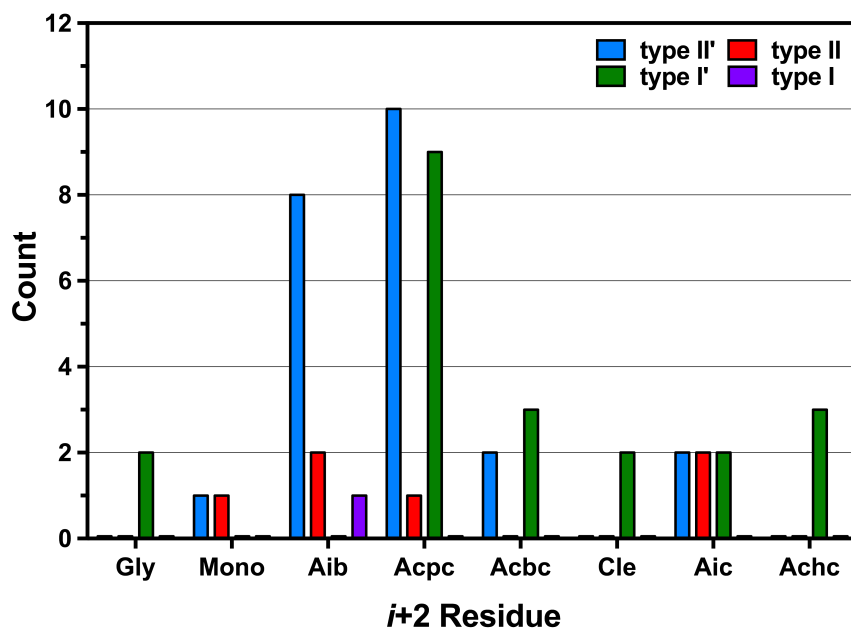

**Figure S4.19:** Chart showing the distribution of turn types as a function of  $i+2$  residue (reproduced from Figure 14 in the manuscript). The symmetry-independent conformers of unfolded peptide **32** were excluded from this analysis.

**Table S4.52:** Distribution of Canonical Turn Types as a Function of C-Terminal Cap Across All Peptides (Except Unfolded **32a,b** and **35–37**)

| C-Terminal Cap | Type II'   | Type II | Type I' | Type I |
|----------------|------------|---------|---------|--------|
| methyl ester   | 8          | 4       | 19      | 0      |
| dimethyl amide | 15         | 0       | 2       | 0      |
|                | <b>Sum</b> |         |         | 48     |

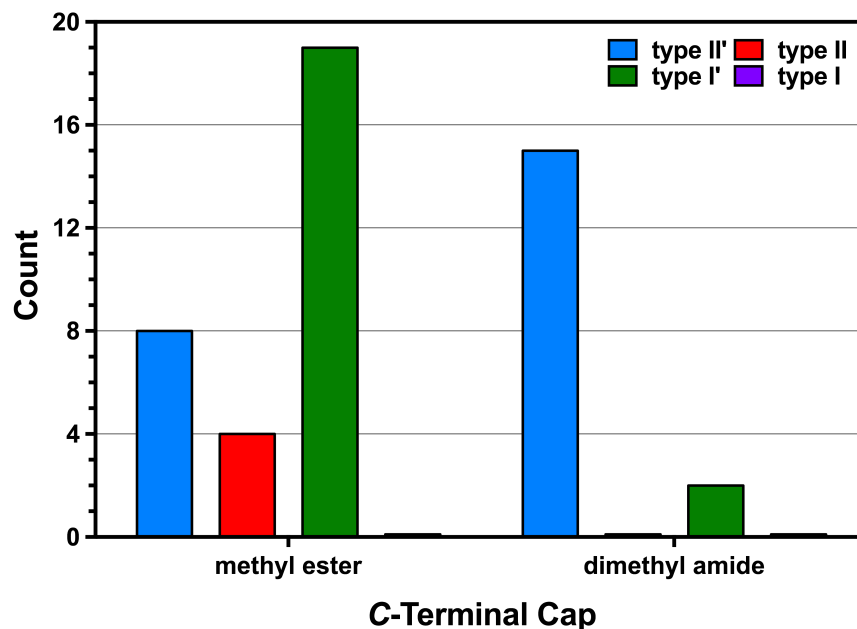

**Figure S4.20:** Chart showing the distribution of turn types as a function of  $i+2$  residue (reproduced from Figure 17 in the manuscript). The symmetry-independent conformers of unfolded peptide **32** and the (*R*)- $\alpha$ -Mba-capped peptides **35–37** were excluded from this analysis.

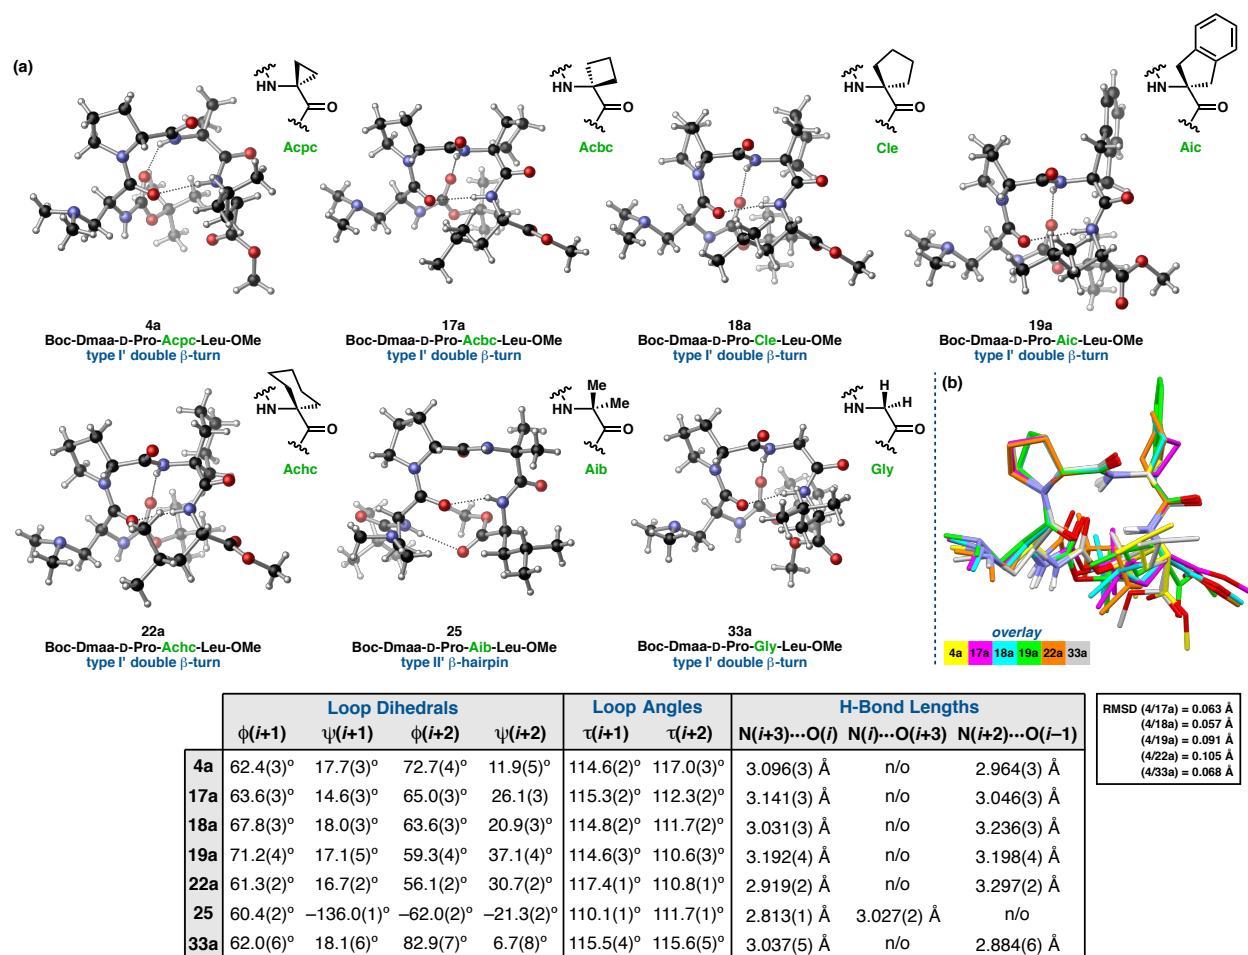

**Figure S4.21:** Structural comparison of  $i+2$  homologous series reproduced from Figure 15 in the manuscript. **(a)** A homologous series of peptides differing from one another only in the  $i+2$  residue. For sequences with  $Z' > 1$ , only one structure is shown. The table highlights important structural differences among the members of the series. **(b)** An overlay of the type I'  $\beta$ -turns from the homologous series shows tight overlap in the loop region and more deviations at the peripheral residues. All loop RMSDs are less than 0.11 Å.

## V. Solution-Phase NMR Studies

### A. NMR Methods

To fully characterize peptides in solution, one-dimensional  $^1\text{H}$  and two-dimensional gCOSY and  $^1\text{H}$ - $^1\text{H}$ -NOESY experiments were carried out for each compound. All data were collected on Varian Inova 600 MHz spectrometers that were equipped with VnmrJ, version 4.2, revision A. Varian provided the pulse sequences for all experiments. All samples were prepared in  $\text{C}_6\text{D}_6$  (referenced to residual  $\text{C}_6\text{H}_6$  at 7.16 ppm)<sup>1</sup> at a concentration of 0.01 M, which was demonstrated to be below the aggregation limit for these peptides.

All NOESY spectra were acquired at 20–25 °C (specific temperatures are noted with spectra, *vide infra*). The NOESY data for each peptide were collected with a mixing time of 300 ms, a spectral width of 9615.4 Hz, and a d1 time of 3 s. The data were acquired with a total of 256 transients, 1442 points in the f2 dimension, and 256 points in the f1 dimension. The spectra were processed using MestReNova, version 9.0.0–12821. Zero-filling sized the spectra to 2048, 2048. Automatic phasing was used in conjunction with manual adjustments. Additionally, apodization was accomplished with a sine square function (90°) in both dimensions.<sup>27</sup> Each spectrum was automatically baseline corrected in each dimension using the Bernstein third order polynomial fit and treated with COSY-like symmetrization. The NOESY spectra were inspected before and after symmetrization, and peaks deemed to be artifacts were discarded. Further refinement included treatment of the spectrum to reduce t1 noise.

The NOESY spectra were integrated to extract distances from observed through-space interactions between protons. After integrating NOESY cross-peaks, the peak volumes were converted to distances using equation S1,<sup>28</sup> where  $r_{ij}$  is the calculated distance,  $r_{ref}$  is a reference distance,  $v_{ref}$  is the volume of a reference peak, and  $v_{ij}$  is the volume of the cross-peak in question. Reference peaks were chosen to be those that corresponded to interactions between the  $\delta$ -protons of the respective D-Pro or L-Pro residues. Reference distances that corresponded to these volumes were extracted from the appropriate peptide crystal structure.

$$r_{ij} = r_{ref} \sqrt[3]{\left(\frac{v_{ref}}{v_{ij}}\right)} \quad (\text{S1})$$

Integrated volumes were corrected using equation S2,<sup>29</sup> where  $v$  is the volume corresponding to either the reference or the peak in question from equation S1,  $v_{raw}$  is the uncorrected volume of a peak in question, and  $v_{diag1}$  and  $v_{diag2}$  correspond to the volumes of the diagonal peaks for each respective interacting proton.

$$v = \frac{2v_{raw}}{(v_{diag1} + v_{diag2})} \quad (\text{S2})$$



## B. Characterization, Assignment, & Through-Space Interactions of Peptides in C<sub>6</sub>D<sub>6</sub>

### General Information:

The notation used below is as follows. Each proton is designated by the three- or four-letter code of its amino acid residue.<sup>30</sup> Protons on the *tert*-butoxycarbonyl (Boc) *N*-terminal cap are called DmaaBoc protons. Additional notation equates the following:  $\alpha = A$ ,  $\beta = B$ ,  $\gamma = G$ , and  $\delta = D$ . Finally, for protons that are on the same carbon but are NMR-distinct, “2” is attributed to the more downfield proton and “1” to the more upfield proton. To further differentiate protons on the same sample, a, b, c, etc. are added, the more upfield shift having the earlier alphabetical identifier. For example, AcpcHB1a is the notation for the most upfield  $\beta$ -proton of the Acpc residue in our peptide.

The NOESY spectrum and nOe-map for each peptide is shown below. Each nOe map is accompanied by a legend that color-codes the distance between the protons whose through-space interactions were detected by our NOESY experiments. Additional contacts are noted on the nOe-maps of analyzed peptides that correspond to NOESY cross-peaks that were somehow compromised in resolution from another peak or high-noise areas. These contacts appear in purple and informed our overall conformational assessment of peptides, but were not quantitatively analyzed.

# Peptide 3

$^1\text{H-NMR}$  (600 MHz, 0.01 M in  $\text{C}_6\text{D}_6$ , 25  $^\circ\text{C}$ )

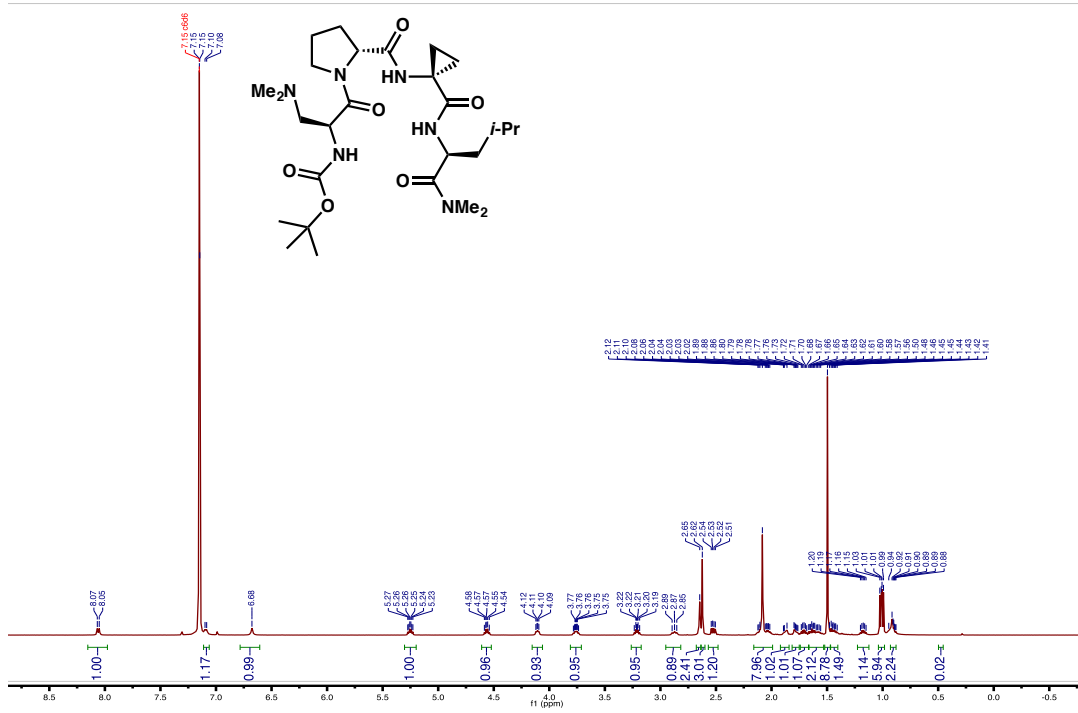

$\text{COSY}$  (600 MHz, 0.01 M in  $\text{C}_6\text{D}_6$ , 25  $^\circ\text{C}$ )

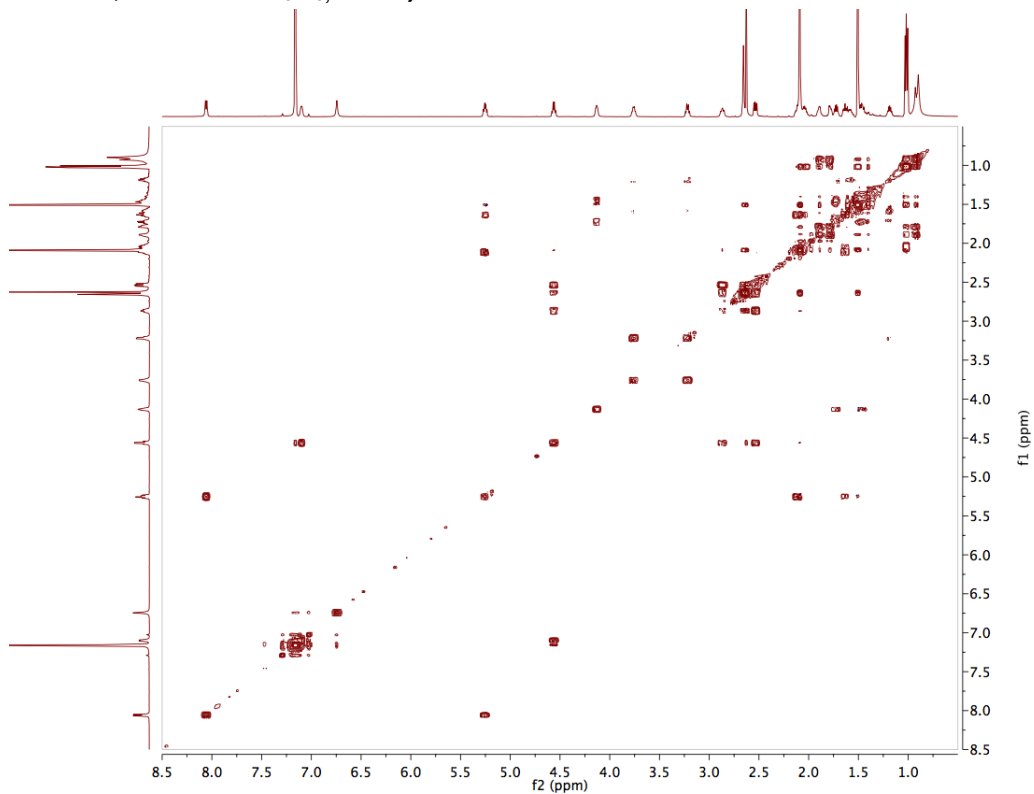

**Table S5.01: Peak Assignments for Peptide 3**

| Assignment (splitting)            | Shift (ppm) | Range (ppm) | H's | J's (Hz)          |
|-----------------------------------|-------------|-------------|-----|-------------------|
| LeuNMe (m)                        | 2.64        | 2.69–2.61   | 6   |                   |
| LeuNH (d)                         | 8.07        | 8.17–7.98   | 1   | 8.68              |
| LeuHD (dd)                        | 1.02        | 1.13–0.83   | 6   | 6.53, 10.01       |
| LeuHG (m)                         | 2.04        | 2.07–1.98   | 1   |                   |
| LeuHB1 (ddd)                      | 1.65        | 1.68–1.61   | 1   | 4.93, 8.47, 13.36 |
| LeuHA (td)                        | 5.26        | 5.58–5.19   | 1   | 4.91, 9.16        |
| DProHG2 (m)                       | 1.59        | 1.61–1.54   | 1   |                   |
| DProHG1 (dt)                      | 1.18        | 1.24–1.10   | 1   | 6.35, 12.57       |
| DProHD2 (m)                       | 3.77        | 3.81–3.73   | 1   |                   |
| DProHD1 (dt)                      | 3.22        | 3.33–3.09   | 1   | 7.10, 9.98        |
| DProHB2 (m)                       | 1.72        | 1.75–1.68   | 1   |                   |
| DProHB1 (m)                       | 1.45        | 1.48–1.40   | 1   |                   |
| DProHA (dd)                       | 4.12        | 4.19–4.00   | 1   | 4.97, 8.33        |
| DmaaNH (d)                        | 7.1         | 7.12–7.07   | 1   | 7.63              |
| DmaaNMe <sub>2</sub> , LeuHB2 (s) | 2.09        | 2.22–1.90   | 7   |                   |
| DmaaHB2 (t)                       | 2.88        | 2.99–2.79   | 1   | 10.47             |
| DmaaHB1 (dd)                      | 2.53        | 2.56–2.44   | 1   | 6.20, 12.25       |
| DmaaHA (m)                        | 4.57        | 4.61–4.52   | 1   |                   |
| DmaaBoc (s)                       | 1.51        | 1.67–1.48   | 9   |                   |
| AcpcNH (s)                        | 6.69        | 6.91–6.50   | 1   |                   |
| AcpcHB2b (d)                      | 1.89        | 1.92–1.84   | 1   | 15.8              |
| AcpcHB2a (m)                      | 1.79        | 1.85–1.75   | 1   |                   |
| AcpcHB1 (m)                       | 0.92        | 0.96–0.83   | 2   |                   |

NOESY (600 MHz, 0.01 M in C<sub>6</sub>D<sub>6</sub>, 25 °C)

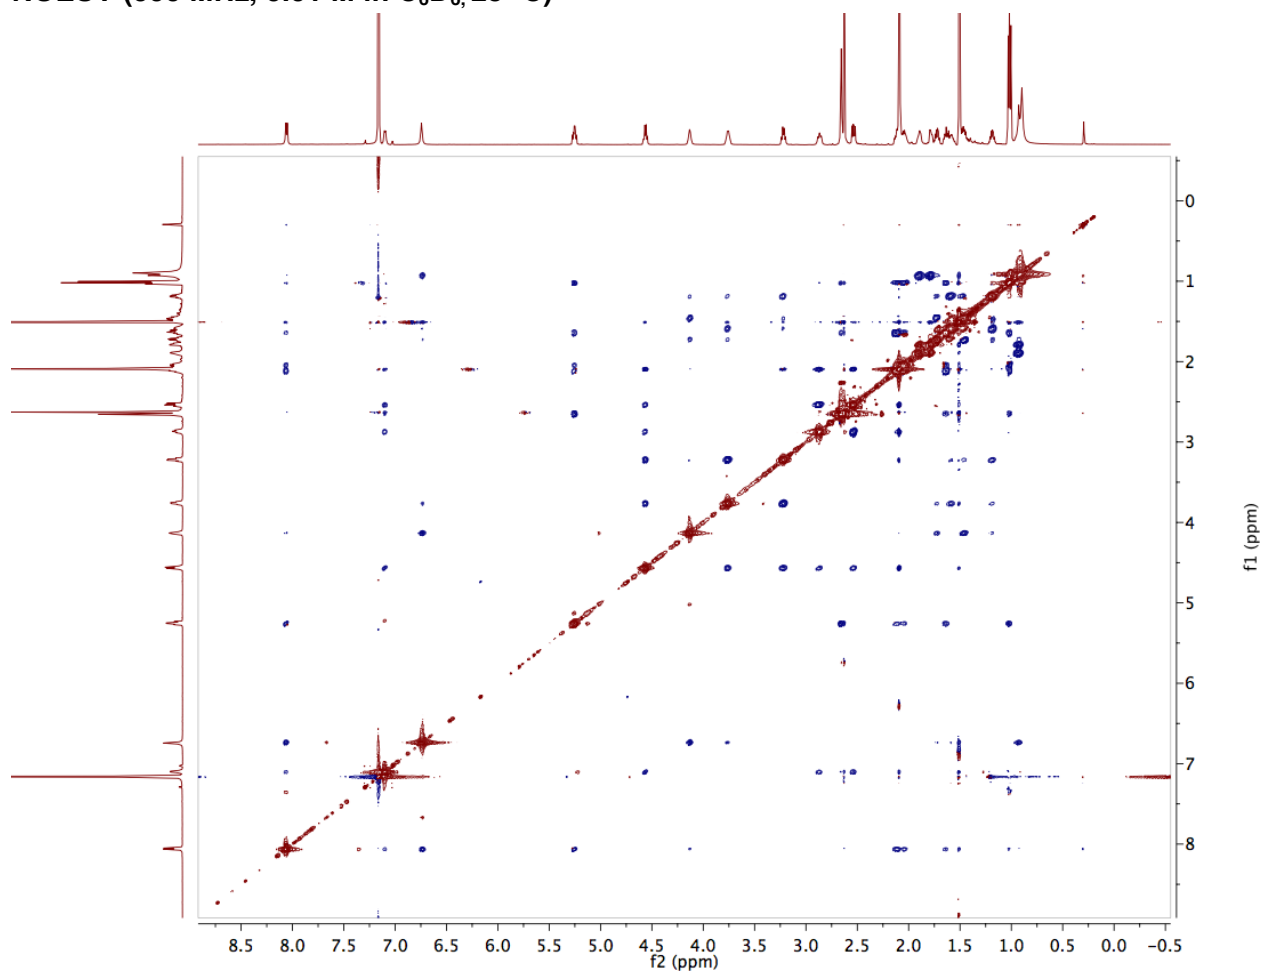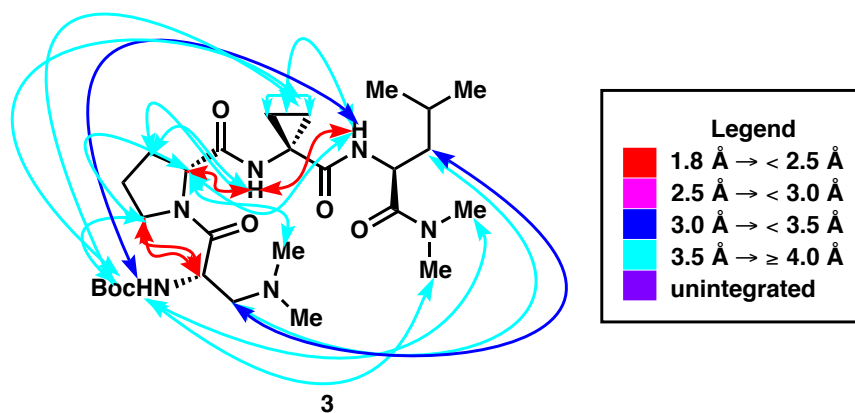

Figure S5.01: Inter-residue nOe Map for Peptide 3

**Table S5.02: Integrated NOESY Cross-peaks for Peptide 3**

|    | f2   | f1   | Normalized | Absolute | Assignment                  | Corrected Distances<br>(Normalized) |
|----|------|------|------------|----------|-----------------------------|-------------------------------------|
| 1  | 8.06 | 1.04 | -0.54      | -0.29    | LeuNH-LeuHD                 | 4.29                                |
|    | 1.02 | 8.06 | -0.64      | -0.34    |                             |                                     |
| 2  | 8.06 | 0.92 | -0.48      | -0.26    | LeuNH-AcpcHB1               | 3.66                                |
|    | 0.91 | 8.07 | -0.52      | -0.28    |                             |                                     |
| 3  | 8.06 | 7.11 | -1         | -0.53    | LeuNH-DmaaNH                | 3.26                                |
|    | 7.11 | 8.08 | -0.97      | -0.52    |                             |                                     |
| 4  | 8.06 | 6.75 | -5.67      | -3.02    | LeuNH-AcpcNH                | 2.42                                |
|    | 6.73 | 8.08 | -5.58      | -2.97    |                             |                                     |
| 5  | 8.06 | 2.04 | -1.78      | -0.95    | LeuNH-LeuHG                 | 3.00                                |
|    | 2.03 | 8.06 | -1.7       | -0.91    |                             |                                     |
| 6  | 8.06 | 2.11 | -4.37      | -2.32    | LeuNH-LeuHB1                | 2.39                                |
|    | 2.11 | 8.06 | -4.59      | -2.44    |                             |                                     |
| 7  | 8.05 | 4.14 | -0.4       | -0.21    | LeuNH-DProHA                | 3.89                                |
|    | 4.12 | 8.06 | -0.36      | -0.19    |                             |                                     |
| 8  | 8.05 | 1.65 | -1.09      | -0.58    | LeuNH-LeuHB2                | 3.20                                |
|    | 1.64 | 8.07 | -1.04      | -0.56    |                             |                                     |
| 9  | 8.05 | 2.66 | -0.1       | -0.05    | LeuNH-LeuNMe2               | 4.96                                |
|    | 2.65 | 8.06 | -0.11      | -0.06    |                             |                                     |
| 10 | 8.05 | 2.63 | -0.08      | -0.04    | LeuNH-LeuNMe1               | 5.27                                |
|    | 2.63 | 8.06 | -0.09      | -0.05    |                             |                                     |
| 11 | 7.1  | 2.09 | -0.81      | -0.43    | DmaaNH-DmaaNMe <sub>2</sub> | 4.02                                |
|    | 2.09 | 7.1  | -0.74      | -0.39    |                             |                                     |
| 12 | 7.1  | 2.89 | -2.51      | -1.33    | DmaaNH-DmaaHB2              | 2.78                                |
|    | 2.87 | 7.11 | -2.57      | -1.37    |                             |                                     |
| 13 | 7.1  | 2.66 | -0.21      | -0.11    | DmaaNH-LeuNMe2              | 4.53                                |
|    | 2.66 | 7.1  | -0.17      | -0.09    |                             |                                     |
| 14 | 7.1  | 2.54 | -2.56      | -1.36    | DmaaNH-DmaaHB1              | 2.80                                |
|    | 2.53 | 7.1  | -2.69      | -1.43    |                             |                                     |
| 15 | 7.1  | 2.63 | -0.57      | -0.3     | DmaaNH-LeuNMe1              | 3.87                                |
|    | 2.63 | 7.1  | -0.56      | -0.3     |                             |                                     |
| 16 | 6.73 | 0.93 | -5.4       | -2.87    | AcpcNH-AcpcHB1              | 2.48                                |
|    | 0.93 | 6.75 | -5.35      | -2.85    |                             |                                     |
| 17 | 6.73 | 3.77 | -0.93      | -0.49    | AcpcNH-DProHD2              | 3.29                                |
|    | 3.76 | 6.74 | -0.94      | -0.5     |                             |                                     |
| 18 | 6.73 | 1.61 | -0.44      | -0.23    | AcpcNH-DProHB1              | 3.68                                |
|    | 1.58 | 6.74 | -0.49      | -0.26    |                             |                                     |
| 19 | 6.73 | 1.73 | -0.52      | -0.27    | AcpcNH-DProHB2              | 3.73                                |
|    | 1.72 | 6.74 | -0.44      | -0.23    |                             |                                     |
| 20 | 6.73 | 4.14 | -7.81      | -4.16    | AcpcNH-DProHA               | 2.36                                |
|    | 4.11 | 6.75 | -7.78      | -4.14    |                             |                                     |
| 21 | 5.25 | 2.63 | -2.6       | -1.38    | LeuHA-LeuNMe1               | 3.00                                |
|    | 2.63 | 5.26 | -3.14      | -1.67    |                             |                                     |
| 22 | 5.25 | 1.02 | -8.02      | -4.27    | LeuHA-LeuHD                 | 2.81                                |
|    | 1.02 | 5.26 | -7.98      | -4.24    |                             |                                     |
| 23 | 5.25 | 2.67 | -8.26      | -4.39    | LeuHA-LeuNMe2               | 3.43                                |
|    | 2.67 | 5.26 | -8.25      | -4.39    |                             |                                     |
| 24 | 5.25 | 2.04 | -2.02      | -1.07    | LeuHA-LeuHG                 | 3.02                                |
|    | 2.04 | 5.26 | -2.04      | -1.09    |                             |                                     |
| 25 | 4.57 | 3.22 | -9.7       | -5.16    | DmaaHA-DProHD1              | 2.26                                |
|    | 3.22 | 4.57 | -9.66      | -5.14    |                             |                                     |
| 26 | 4.56 | 3.76 | -8.64      | -4.6     | DmaaHA-DProHD2              | 2.31                                |
|    | 3.76 | 4.57 | -8.65      | -4.6     |                             |                                     |
| 27 | 4.56 | 2.1  | -7.21      | -3.83    | DmaaHA-DmaaNMe <sub>2</sub> | 2.78                                |
|    | 2.09 | 4.58 | -7.17      | -3.81    |                             |                                     |
| 28 | 4.13 | 3.23 | -0.52      | -0.28    | DProHA-DProHD1              | 3.70                                |
|    | 3.22 | 4.13 | -0.54      | -0.29    |                             |                                     |
| 29 | 4.13 | 1.2  | -0.79      | -0.42    | DProHA-DProHG1              | 3.50                                |
|    | 1.19 | 4.14 | -0.85      | -0.45    |                             |                                     |
| 30 | 4.13 | 2.1  | -0.25      | -0.13    | DProHA-DmaaNMe <sub>2</sub> | 4.97                                |
|    | 2.09 | 4.14 | -0.2       | -0.1     |                             |                                     |
| 31 | 3.76 | 1.73 | -1.12      | -0.6     | DProHD2-DProHB2             | 3.50                                |
|    | 1.72 | 3.76 | -1.13      | -0.6     |                             |                                     |

|    |      |      |        |        |                              |      |
|----|------|------|--------|--------|------------------------------|------|
| 32 | 3.76 | 1.51 | -0.73  | -0.39  | DProHD2-DmaaBoc              | 4.30 |
|    | 1.51 | 3.76 | -0.73  | -0.39  |                              |      |
| 33 | 3.22 | 1.46 | -1.25  | -0.66  | DProHD1-DProHB1              | 3.18 |
|    | 1.46 | 3.22 | -1.25  | -0.66  |                              |      |
| 34 | 2.88 | 1.64 | -0.29  | -0.15  | DmaaHB2-LeuHB2               | 3.93 |
|    | 1.64 | 2.87 | -0.33  | -0.17  |                              |      |
| 35 | 2.87 | 2.1  | -8.64  | -4.59  | DmaaHB2-DmaaNMe <sub>2</sub> | 2.68 |
|    | 2.09 | 2.87 | -8.47  | -4.51  |                              |      |
| 36 | 2.66 | 1.63 | -1.57  | -0.84  | LeuNMe2-LeuHB2               | 3.20 |
|    | 1.64 | 2.66 | -1.47  | -0.78  |                              |      |
| 37 | 2.65 | 1.02 | -1.31  | -0.69  | LeuNMe2-LeuHD                | 4.10 |
|    | 1.01 | 2.66 | -1.26  | -0.67  |                              |      |
| 38 | 2.62 | 1.02 | -0.43  | -0.23  | LeuNMe1-LeuHD                | 4.59 |
|    | 1.02 | 2.63 | -0.52  | -0.28  |                              |      |
| 39 | 2.54 | 2.1  | -7.49  | -3.98  | DmaaHB1-LeuHB2               | 2.93 |
|    | 2.09 | 2.53 | -7.55  | -4.02  |                              |      |
| 40 | 1.64 | 1.02 | -7.41  | -3.94  | LeuHB2-LeuHD                 | 2.82 |
|    | 1.02 | 1.64 | -7.67  | -4.08  |                              |      |
| 41 | 1.51 | 1.79 | -1.53  | -0.75  | DmaaBoc-AcpcHB               | 3.79 |
|    | 1.79 | 1.51 | -1.55  | -0.76  |                              |      |
| 42 | 1.51 | 0.92 | -1.13  | -0.56  | DmaaBoc-AcpcHB               | 4.00 |
|    | 0.93 | 1.5  | -1.15  | -0.56  |                              |      |
| 43 | 3.77 | 3.23 | -35.57 | -18.91 | DProHD1-DProHD2              | 1.80 |
|    | 3.22 | 3.79 | -35.4  | -18.82 |                              |      |

# Peptide 4

$^1\text{H-NMR}$  (600 MHz, 0.01 M in  $\text{C}_6\text{D}_6$ , 20 °C)

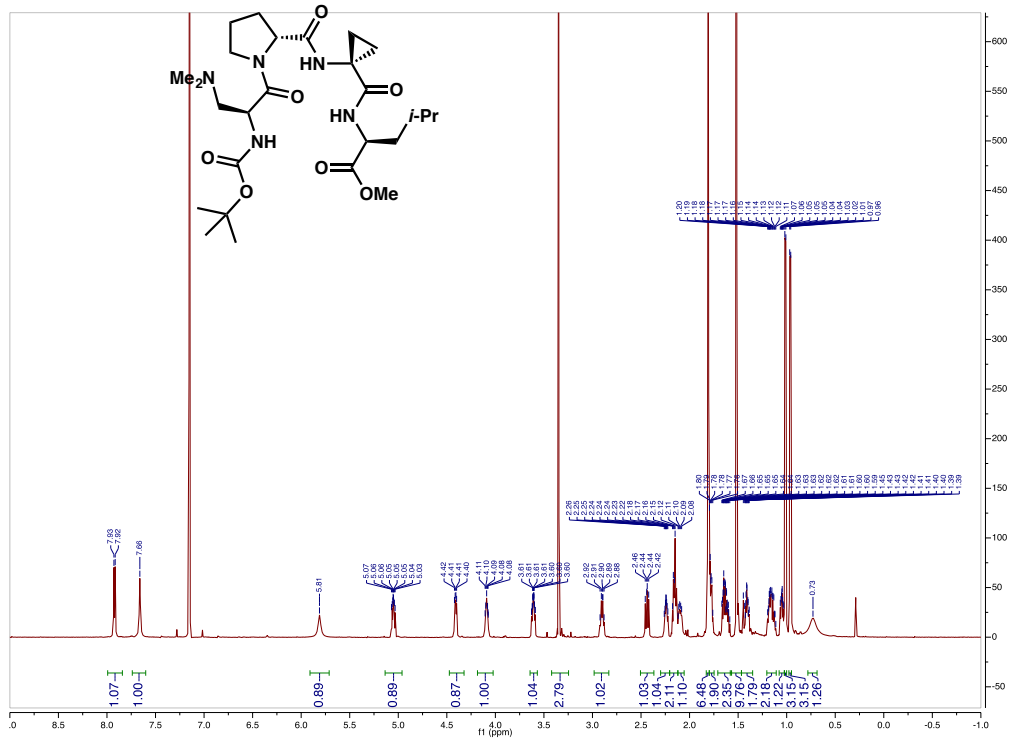

$\text{COSY}$  (600 MHz, 0.01 M in  $\text{C}_6\text{D}_6$ , 25 °C)

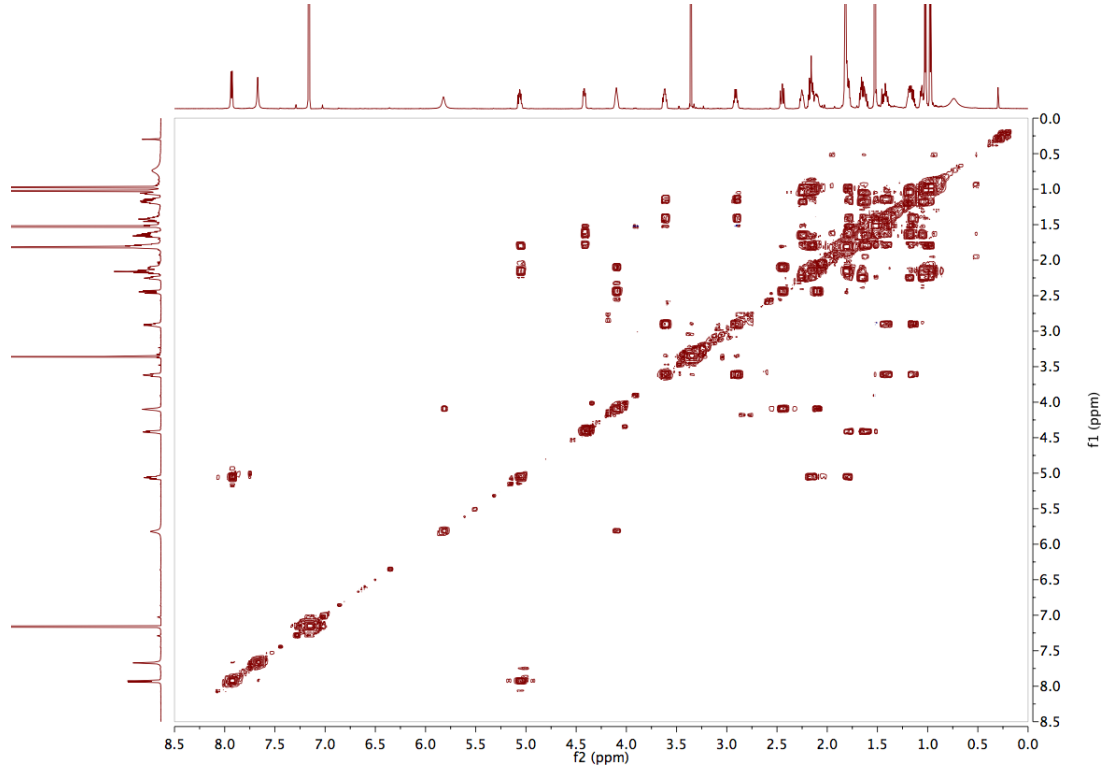

**Table 5.03: Peak Assignments for Peptide 4**

| Assignment (splitting)           | Shift (ppm) | Range (ppm) | H's | J's (Hz)          |
|----------------------------------|-------------|-------------|-----|-------------------|
| LeuOMe (s)                       | 3.36        | 3.36–3.34   | 3   |                   |
| LeuNH (d)                        | 7.93        | 7.99–7.86   | 1   | 7.78              |
| LeuHD (dd)                       | 1           | 1.04–0.95   | 6   | 6.34, 30.02       |
| LeuHB2, DProHB2 (m)              | 2.17        | 2.19–2.13   | 2   |                   |
| LeuHB1 (m)                       | 1.79        | 1.81–1.76   | 1   |                   |
| LeuHA (ddd)                      | 5.06        | 5.12–5.00   | 1   | 4.57, 7.77, 10.05 |
| DProHG2 (m)                      | 1.42        | 1.46–1.38   | 1   |                   |
| DProHG1 (m)                      | 1.14        | 1.16–1.11   | 1   |                   |
| DProHD2 (td)                     | 3.62        | 3.65–3.58   | 1   | 4.96, 8.58        |
| DProHD1 (q)                      | 2.91        | 2.94–2.88   | 1   | 8.29              |
| DProHB1 (m)                      | 1.62        | 1.65–1.59   | 1   |                   |
| DProHA (dd)                      | 4.42        | 4.45–4.39   | 1   | 4.40, 8.70        |
| DmaaNH (s)                       | 5.82        | 5.88–5.77   | 1   |                   |
| DmaaNMe <sub>2</sub> , LeuHG (s) | 1.82        | 1.83–1.81   | 7   |                   |
| DmaaHB2 (dd)                     | 2.45        | 2.47–2.42   | 1   | 9.03, 12.18       |
| DmaaHB1 (m)                      | 2.11        | 2.13–2.07   | 1   |                   |
| DmaaHA (m)                       | 4.1         | 4.13–4.07   | 1   |                   |
| DmaaBoc (s)                      | 1.53        | 1.53–1.51   | 9   |                   |
| AcpcNH (s)                       | 7.67        | 7.70–7.63   | 1   |                   |
| AcpcHB2b (m)                     | 2.25        | 2.28–2.22   | 1   |                   |
| AcpcHB2a (m)                     | 1.66        | 1.68–1.65   | 1   |                   |
| AcpcHB1b (m)                     | 1.19        | 1.22–1.17   | 1   |                   |
| AcpcHB1a (m)                     | 1.06        | 1.09–1.03   | 1   |                   |



NOESY (600 MHz, 0.01 M in C<sub>6</sub>D<sub>6</sub>, 25 °C)

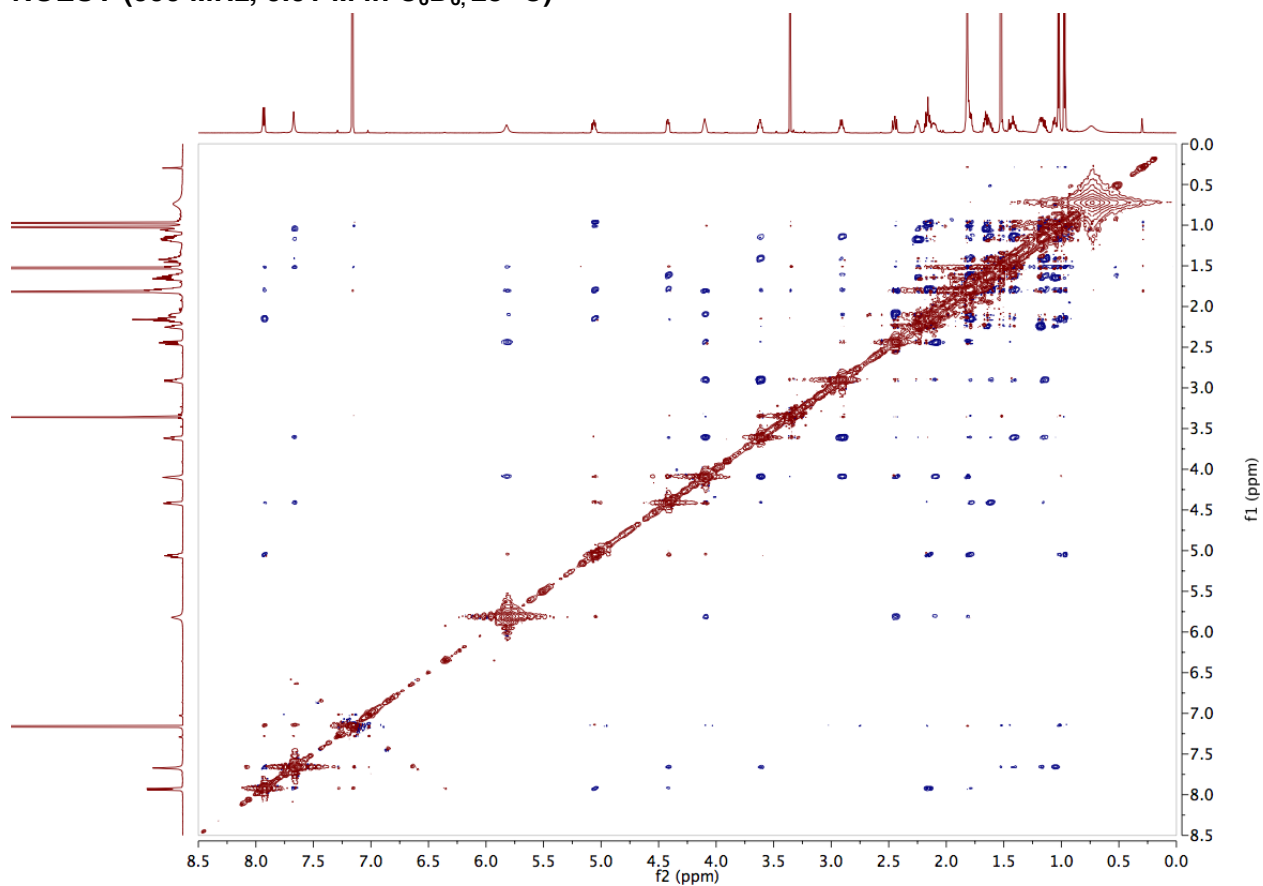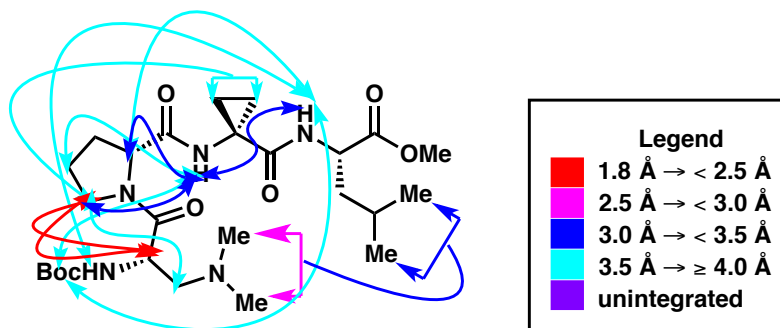

4

Figure S5.02: Inter-residue nOe Map for Peptide 4

**Table S5.04: Integrated NOESY Cross-peaks for Peptide 4**

|    | f2   | f1   | Normalized | Absolute | Assignment                            | Corrected Distances (Normalized) |
|----|------|------|------------|----------|---------------------------------------|----------------------------------|
| 1  | 7.93 | 5.81 | -0.24      | -0.03    | LeuNH-DmaaNH                          | 4.21                             |
|    | 5.81 | 7.94 | -0.24      | -0.03    |                                       |                                  |
| 2  | 7.93 | 7.67 | -1.27      | -0.18    | LeuNH-AcpcNH                          | 3.19                             |
|    | 7.67 | 7.93 | -1.26      | -0.18    |                                       |                                  |
| 3  | 7.93 | 1.53 | -0.72      | -0.1     | LeuNH-DmaaBoc                         | 4.31                             |
|    | 1.53 | 7.93 | -0.7       | -0.1     |                                       |                                  |
| 4  | 7.93 | 4.42 | -0.55      | -0.08    | LeuNH-DProHA                          | 3.70                             |
|    | 4.42 | 7.93 | -0.58      | -0.08    |                                       |                                  |
| 5  | 7.67 | 1.53 | -1.75      | -0.25    | AcpcNH-DmaaBoc                        | 3.70                             |
|    | 1.53 | 7.67 | -1.75      | -0.25    |                                       |                                  |
| 6  | 7.67 | 1.42 | -0.95      | -0.14    | AcpcNH-DProHG2                        | 3.60                             |
|    | 1.42 | 7.67 | -0.9       | -0.13    |                                       |                                  |
| 7  | 7.67 | 1.06 | -4.47      | -0.64    | AcpcNH-AcpcHB1a                       | 2.55                             |
|    | 1.05 | 7.67 | -4.48      | -0.64    |                                       |                                  |
| 8  | 7.67 | 4.42 | -1.76      | -0.25    | AcpcNH-DProHA                         | 3.03                             |
|    | 4.42 | 7.67 | -1.76      | -0.25    |                                       |                                  |
| 9  | 7.67 | 3.62 | -1.63      | -0.23    | AcpcNH-DProHD2                        | 3.04                             |
|    | 3.62 | 7.67 | -1.63      | -0.23    |                                       |                                  |
| 10 | 7.67 | 1.18 | -1.09      | -0.16    | AcpcNH-AcpcHB1b                       | 3.32                             |
|    | 1.18 | 7.67 | -1.11      | -0.16    |                                       |                                  |
| 11 | 7.67 | 1.66 | -0.28      | -0.04    | AcpcNH-AcpcHB2a                       | 4.18                             |
|    | 1.66 | 7.67 | -0.28      | -0.04    |                                       |                                  |
| 12 | 5.82 | 2.45 | -5.57      | -0.8     | DmaaNH-DmaaHB2                        | 2.51                             |
|    | 2.45 | 5.83 | -5.55      | -0.8     |                                       |                                  |
| 13 | 5.82 | 1.53 | -0.91      | -0.13    | DmaaNH-DmaaBoc                        | 4.13                             |
|    | 1.53 | 5.82 | -0.9       | -0.13    |                                       |                                  |
| 14 | 5.81 | 2.1  | -1.35      | -0.19    | DmaaNH-DmaaHB1                        | 3.15                             |
|    | 2.1  | 5.82 | -1.31      | -0.19    |                                       |                                  |
| 16 | 5.06 | 0.99 | -6.49      | -0.93    | LeuHA-LeuHD                           | 2.73                             |
|    | 0.99 | 5.06 | -6.57      | -0.94    |                                       |                                  |
| 17 | 4.1  | 3.62 | -13.32     | -1.92    | DmaaHA-DProHD2                        | 2.18                             |
|    | 3.62 | 4.1  | -13.33     | -1.92    |                                       |                                  |
| 18 | 4.42 | 1.42 | -0.19      | -0.03    | DProHA-DProHG2                        | 4.62                             |
|    | 1.41 | 4.42 | -0.18      | -0.03    |                                       |                                  |
| 19 | 4.1  | 2.91 | -10.44     | -1.5     | DmaaHA-DProHD1                        | 2.28                             |
|    | 2.91 | 4.1  | -10.38     | -1.49    |                                       |                                  |
| 20 | 4.1  | 1.82 | -7.1       | -1.02    | DmaaHA-DmaaNMe <sub>2</sub>           | 2.87                             |
|    | 1.82 | 4.11 | -7.11      | -1.02    |                                       |                                  |
| 21 | 3.61 | 1.06 | -0.27      | -0.04    | DProHD2-AcpcHB1a                      | 4.10                             |
|    | 1.06 | 3.62 | -0.27      | -0.04    |                                       |                                  |
| 23 | 2.91 | 1.62 | -0.9       | -0.13    | DProHD1-DProHB1                       | 3.31                             |
|    | 1.61 | 2.91 | -0.96      | -0.14    |                                       |                                  |
| 24 | 2.91 | 2.11 | -0.65      | -0.09    | DProHD1-DmaaHB1                       | 3.60                             |
|    | 2.11 | 2.91 | -0.64      | -0.09    |                                       |                                  |
| 25 | 2.44 | 1.82 | -5.64      | -0.81    | DmaaHB2-DmaaNMe <sub>2</sub>          | 2.99                             |
|    | 1.82 | 2.44 | -5.64      | -0.81    |                                       |                                  |
| 26 | 1.81 | 1.02 | -6.61      | -0.95    | LeuHD(downfield)-DmaaNMe <sub>2</sub> | 3.04                             |
|    | 1.02 | 1.82 | -6.59      | -0.95    |                                       |                                  |
| 27 | 3.62 | 2.91 | -40.93     | -5.89    | DProHD2-DProHD1                       | 1.80                             |
|    | 2.91 | 3.61 | -40.67     | -5.85    |                                       |                                  |

# Peptide 7

$^1\text{H-NMR}$  (600 MHz, 0.01 M in  $\text{C}_6\text{D}_6$ , 25 °C)

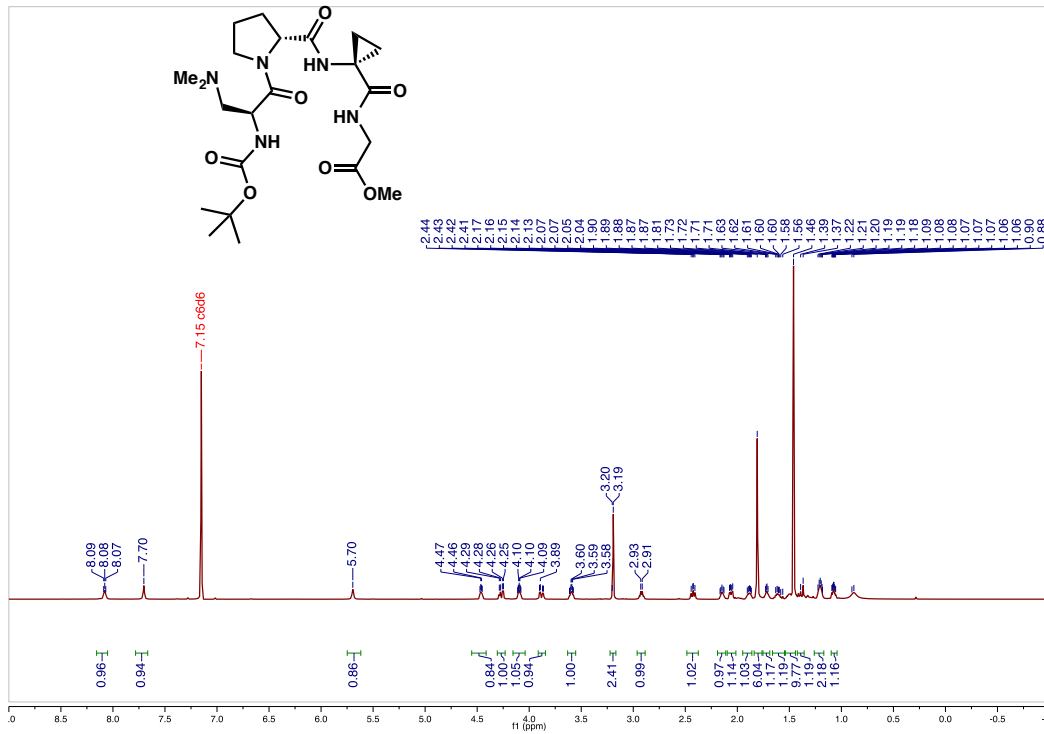

COSY (600 MHz, 0.01 M in  $\text{C}_6\text{D}_6$ , 25 °C)

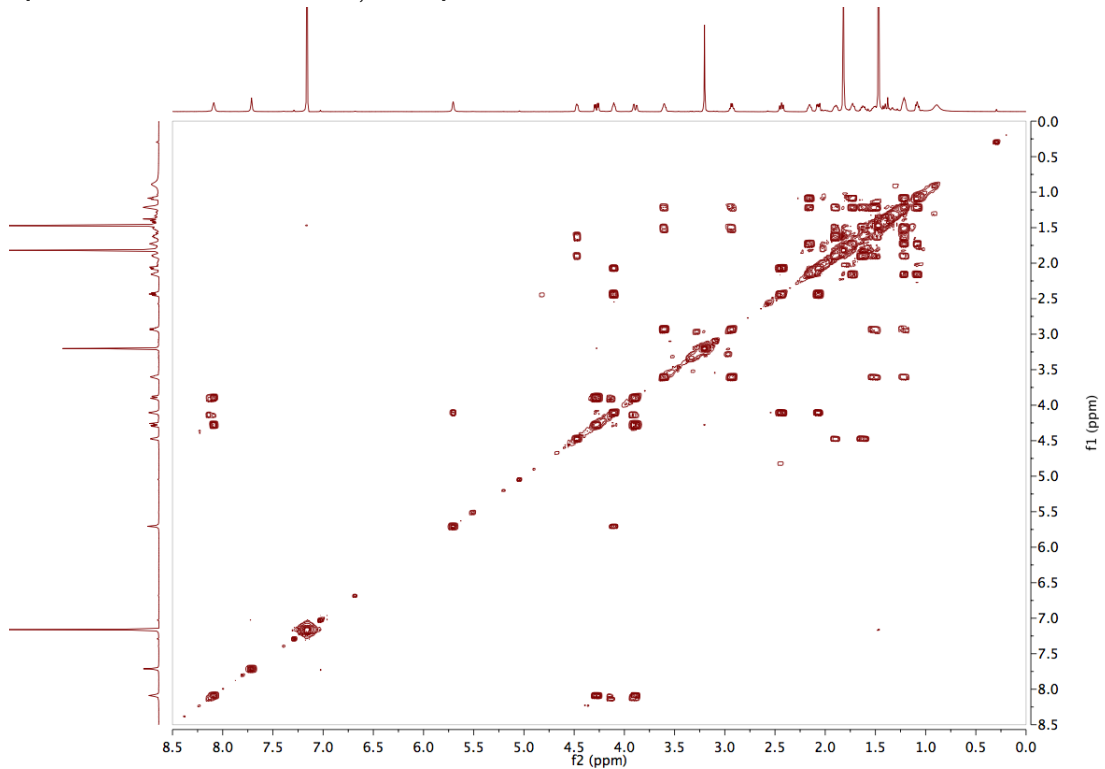

**Table 5.05: Peak Assignments for Peptide 7**

| Name                     | Shift (ppm) | Range (ppm) | H's | J's (Hz)         |
|--------------------------|-------------|-------------|-----|------------------|
| GlyOMe (s)               | 3.20        | 3.31–3.15   | 2   |                  |
| GlyNH (t)                | 8.09        | 8.12–8.06   | 1   | 6.01             |
| GlyHA1 (dd)              | 3.89        | 4.01–3.81   | 1   | 5.21, 17.58      |
| GlyHA2 (dd)              | 4.28        | 4.37–4.21   | 1   | 6.24, 17.54      |
| DProHG2 (m)              | 1.53        | 1.59–1.49   | 1   |                  |
| DProHD1 (d)              | 2.93        | 3.04–2.84   | 1   | 8.21             |
| DProHD2 (m)              | 3.60        | 3.69–3.53   | 1   |                  |
| DProHB1 (dd)             | 1.62        | 1.68–1.58   | 1   | 15.66, 8.02      |
| DProHB2 (m)              | 1.90        | 1.93–1.86   | 1   |                  |
| DProHA (dd)              | 4.47        | 4.53–4.41   | 1   | 8.77, 4.12       |
| DmaaNMe <sub>2</sub> (s) | 1.82        | 1.84–1.80   | 6   |                  |
| DmaaNH (s)               | 5.71        | 5.77–5.65   | 1   |                  |
| AcpcHB1a (ddd)           | 1.08        | 1.18–1.02   | 1   | 4.03, 7.60, 9.85 |
| DmaaHB1 (dd)             | 2.07        | 2.12–2.02   | 1   | 5.85, 12.42      |
| DmaaHB2 (dd)             | 2.44        | 2.49–2.39   | 1   | 9.27, 12.26      |
| DmaaHA (dd)              | 4.11        | 4.14–4.07   | 1   | 9.49, 4.58       |
| DmaaBoc (s)              | 1.47        | 1.56–1.36   | 9   |                  |
| AcpcNH (s)               | 7.71        | 7.76–7.68   | 1   |                  |
| AcpcHB1b, DProHG2 (m)    | 1.21        | 1.26–1.17   | 2   |                  |
| AcpcHB2a (m)             | 1.73        | 1.76–1.69   | 1   |                  |
| AcpcHB2b (m)             | 2.15        | 2.19–2.05   | 1   |                  |

NOESY (600 MHz, 0.01 M in C<sub>6</sub>D<sub>6</sub>, 25 °C)

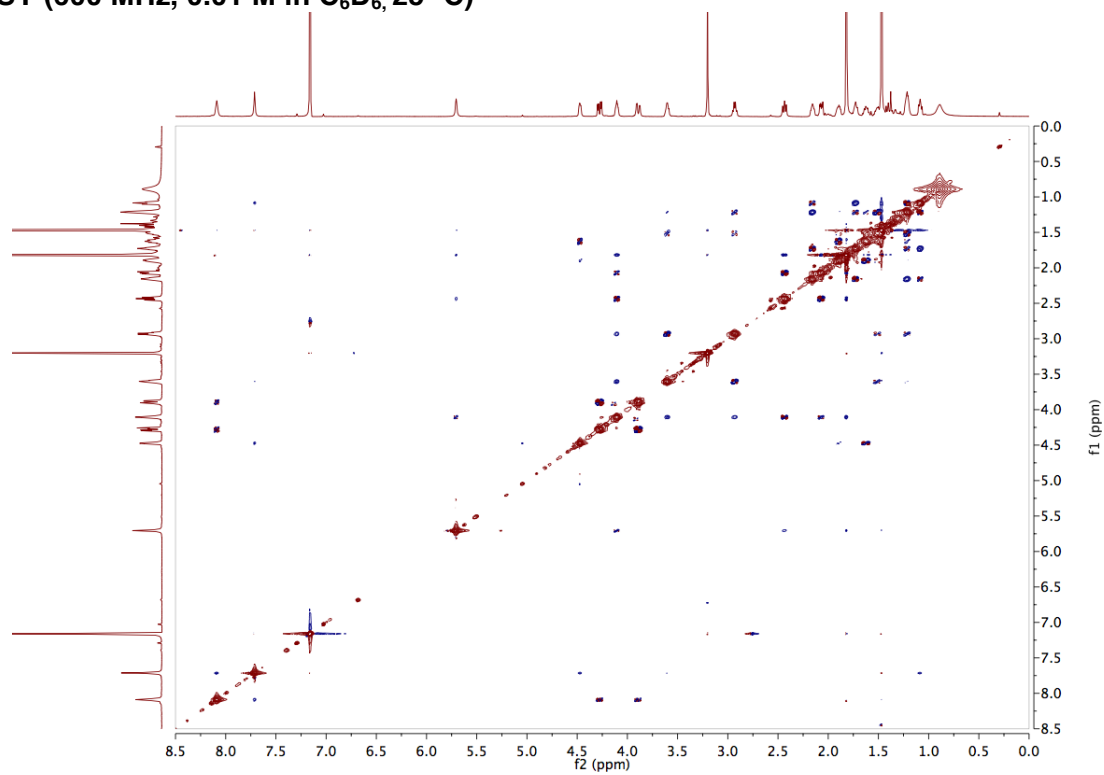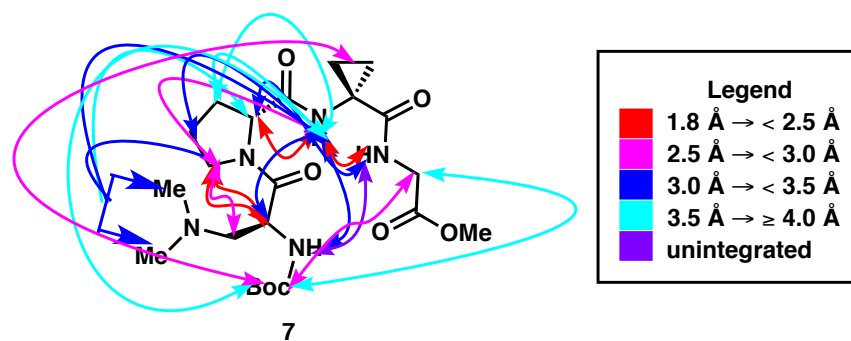

Figure S5.03: Inter-residue nOe Map for Peptide 7

**Table S5.06:** Integrated NOESY Cross-peaks for Peptide 7

|    | f2   | f1   | Normalized | Absolute | Assignment                  | Normalized Average Volume | Corrected Distances (Normalized) |    |      |      |       |       |                             |        |      |      |      |       |       |    |      |      |       |       |                             |        |      |      |      |       |       |    |      |      |       |       |                             |        |      |      |      |       |       |    |      |      |       |       |                             |        |      |      |      |       |       |    |      |      |       |       |                             |        |      |      |      |       |       |    |      |      |       |       |                             |        |      |      |      |       |       |    |      |      |       |       |                             |        |      |      |      |       |       |    |      |      |       |       |                             |        |      |      |      |       |       |    |      |      |       |       |                             |        |      |      |      |       |       |    |      |      |       |       |                             |        |      |      |      |       |       |    |      |      |       |       |                             |        |      |      |      |       |       |    |      |      |       |       |                             |        |      |      |      |       |       |    |      |      |       |       |                             |        |      |      |      |       |       |    |      |      |       |       |                             |        |      |      |      |       |       |    |      |      |       |       |                             |        |      |      |      |       |       |    |      |      |       |       |                             |        |      |      |      |       |       |    |      |      |       |       |                |        |      |
|----|------|------|------------|----------|-----------------------------|---------------------------|----------------------------------|----|------|------|-------|-------|-----------------------------|--------|------|------|------|-------|-------|----|------|------|-------|-------|-----------------------------|--------|------|------|------|-------|-------|----|------|------|-------|-------|-----------------------------|--------|------|------|------|-------|-------|----|------|------|-------|-------|-----------------------------|--------|------|------|------|-------|-------|----|------|------|-------|-------|-----------------------------|--------|------|------|------|-------|-------|----|------|------|-------|-------|-----------------------------|--------|------|------|------|-------|-------|----|------|------|-------|-------|-----------------------------|--------|------|------|------|-------|-------|----|------|------|-------|-------|-----------------------------|--------|------|------|------|-------|-------|----|------|------|-------|-------|-----------------------------|--------|------|------|------|-------|-------|----|------|------|-------|-------|-----------------------------|--------|------|------|------|-------|-------|----|------|------|-------|-------|-----------------------------|--------|------|------|------|-------|-------|----|------|------|-------|-------|-----------------------------|--------|------|------|------|-------|-------|----|------|------|-------|-------|-----------------------------|--------|------|------|------|-------|-------|----|------|------|-------|-------|-----------------------------|--------|------|------|------|-------|-------|----|------|------|-------|-------|-----------------------------|--------|------|------|------|-------|-------|----|------|------|-------|-------|-----------------------------|--------|------|------|------|-------|-------|----|------|------|-------|-------|----------------|--------|------|
| 1  | 8.09 | 7.71 | -1.03      | -0.66    | GlyNH-AcpcNH                | -1.03                     | 2.21                             |    |      |      |       |       |                             |        |      |      |      |       |       |    |      |      |       |       |                             |        |      |      |      |       |       |    |      |      |       |       |                             |        |      |      |      |       |       |    |      |      |       |       |                             |        |      |      |      |       |       |    |      |      |       |       |                             |        |      |      |      |       |       |    |      |      |       |       |                             |        |      |      |      |       |       |    |      |      |       |       |                             |        |      |      |      |       |       |    |      |      |       |       |                             |        |      |      |      |       |       |    |      |      |       |       |                             |        |      |      |      |       |       |    |      |      |       |       |                             |        |      |      |      |       |       |    |      |      |       |       |                             |        |      |      |      |       |       |    |      |      |       |       |                             |        |      |      |      |       |       |    |      |      |       |       |                             |        |      |      |      |       |       |    |      |      |       |       |                             |        |      |      |      |       |       |    |      |      |       |       |                             |        |      |      |      |       |       |    |      |      |       |       |                             |        |      |      |      |       |       |    |      |      |       |       |                |        |      |
|    | 7.71 | 8.09 | -1.03      | -0.66    |                             |                           |                                  | 2  | 8.09 | 4.47 | -0.12 | -0.08 | GlyNH-DProHA                | -0.12  | 3.23 | 4.47 | 8.09 | -0.12 | -0.08 | 3  | 7.72 | 5.7  | -0.02 | -0.01 | AcpcNH-DmaaNH               | -0.025 | 4.13 | 5.7  | 7.71 | -0.03 | -0.02 | 4  | 7.71 | 4.47 | -0.86 | -0.55 | AcpcNH-DProHA               | -0.86  | 2.31 | 4.47 | 7.71 | -0.86 | -0.55 | 5  | 7.71 | 4.11 | -0.09 | -0.06 | AcpcNH-DmaaHA               | -0.085 | 3.42 | 4.1  | 7.71 | -0.08 | -0.05 | 6  | 7.71 | 3.6  | -0.48 | -0.31 | AcpcNH-DProHD               | -0.485 | 2.55 | 3.6  | 7.71 | -0.49 | -0.32 | 7  | 7.71 | 2.16 | -0.03 | -0.02 | AcpcNH-AcpcHB2b             | -0.03  | 4.04 | 2.16 | 7.71 | -0.03 | -0.02 | 8  | 7.71 | 1.9  | -0.14 | -0.09 | AcpcNH-DProHB2              | -0.135 | 3.80 | 1.89 | 7.71 | -0.13 | -0.09 | 9  | 7.71 | 1.72 | -0.04 | -0.02 | AcpcNH-DProHB1              | -0.045 | 3.81 | 1.72 | 7.71 | -0.05 | -0.03 | 10 | 7.71 | 1.09 | -0.85 | -0.55 | AcpcNH-AcpcHB2a             | -0.86  | 2.32 | 1.09 | 7.71 | -0.87 | -0.56 | 11 | 7.71 | 1.51 | -0.13 | -0.08 | AcpcNH-DProHG               | -0.13  | 3.07 | 1.51 | 7.71 | -0.13 | -0.09 | 12 | 5.7  | 2.43 | -1.01 | -0.65 | AcpcNH-AcpcHB1a             | -1.01  | 2.26 | 2.43 | 5.7  | -1.01 | -0.65 | 13 | 5.7  | 2.07 | -0.29 | -0.19 | DmaaNH-DmaaHB1              | -0.295 | 2.81 | 2.07 | 5.71 | -0.3  | -0.19 | 14 | 5.7  | 1.82 | -0.31 | -0.2  | AcpcNH-DmaaNMe <sub>2</sub> | -0.315 | 3.31 | 1.82 | 5.7  | -0.32 | -0.21 | 15 | 5.71 | 1.47 | -0.26 | -0.17 | AcpcNH-DmaaBoc              | -0.26  | 3.66 | 1.47 | 5.7  | -0.26 | -0.17 | 16 | 4.47 | 2.94 | -0.13 | -0.09 | DProHA-DProHD1              | -0.135 | 3.21 | 2.94 | 4.47 | -0.14 | -0.09 | 17 | 4.48 | 1.82 | -0.11 | -0.07 | DProHA-DmaaNMe <sub>2</sub> | -0.115 | 3.93 | 1.82 | 4.48 | -0.12 | -0.08 | 18 | 4.27 | 1.47 | -0.29 | -0.18 | GlyHA2-DmaaBoc | -0.305 | 3.58 |
| 2  | 8.09 | 4.47 | -0.12      | -0.08    | GlyNH-DProHA                | -0.12                     | 3.23                             |    |      |      |       |       |                             |        |      |      |      |       |       |    |      |      |       |       |                             |        |      |      |      |       |       |    |      |      |       |       |                             |        |      |      |      |       |       |    |      |      |       |       |                             |        |      |      |      |       |       |    |      |      |       |       |                             |        |      |      |      |       |       |    |      |      |       |       |                             |        |      |      |      |       |       |    |      |      |       |       |                             |        |      |      |      |       |       |    |      |      |       |       |                             |        |      |      |      |       |       |    |      |      |       |       |                             |        |      |      |      |       |       |    |      |      |       |       |                             |        |      |      |      |       |       |    |      |      |       |       |                             |        |      |      |      |       |       |    |      |      |       |       |                             |        |      |      |      |       |       |    |      |      |       |       |                             |        |      |      |      |       |       |    |      |      |       |       |                             |        |      |      |      |       |       |    |      |      |       |       |                             |        |      |      |      |       |       |    |      |      |       |       |                             |        |      |      |      |       |       |    |      |      |       |       |                |        |      |
|    | 4.47 | 8.09 | -0.12      | -0.08    |                             |                           |                                  | 3  | 7.72 | 5.7  | -0.02 | -0.01 | AcpcNH-DmaaNH               | -0.025 | 4.13 | 5.7  | 7.71 | -0.03 | -0.02 | 4  | 7.71 | 4.47 | -0.86 | -0.55 | AcpcNH-DProHA               | -0.86  | 2.31 | 4.47 | 7.71 | -0.86 | -0.55 | 5  | 7.71 | 4.11 | -0.09 | -0.06 | AcpcNH-DmaaHA               | -0.085 | 3.42 | 4.1  | 7.71 | -0.08 | -0.05 | 6  | 7.71 | 3.6  | -0.48 | -0.31 | AcpcNH-DProHD               | -0.485 | 2.55 | 3.6  | 7.71 | -0.49 | -0.32 | 7  | 7.71 | 2.16 | -0.03 | -0.02 | AcpcNH-AcpcHB2b             | -0.03  | 4.04 | 2.16 | 7.71 | -0.03 | -0.02 | 8  | 7.71 | 1.9  | -0.14 | -0.09 | AcpcNH-DProHB2              | -0.135 | 3.80 | 1.89 | 7.71 | -0.13 | -0.09 | 9  | 7.71 | 1.72 | -0.04 | -0.02 | AcpcNH-DProHB1              | -0.045 | 3.81 | 1.72 | 7.71 | -0.05 | -0.03 | 10 | 7.71 | 1.09 | -0.85 | -0.55 | AcpcNH-AcpcHB2a             | -0.86  | 2.32 | 1.09 | 7.71 | -0.87 | -0.56 | 11 | 7.71 | 1.51 | -0.13 | -0.08 | AcpcNH-DProHG               | -0.13  | 3.07 | 1.51 | 7.71 | -0.13 | -0.09 | 12 | 5.7  | 2.43 | -1.01 | -0.65 | AcpcNH-AcpcHB1a             | -1.01  | 2.26 | 2.43 | 5.7  | -1.01 | -0.65 | 13 | 5.7  | 2.07 | -0.29 | -0.19 | DmaaNH-DmaaHB1              | -0.295 | 2.81 | 2.07 | 5.71 | -0.3  | -0.19 | 14 | 5.7  | 1.82 | -0.31 | -0.2  | AcpcNH-DmaaNMe <sub>2</sub> | -0.315 | 3.31 | 1.82 | 5.7  | -0.32 | -0.21 | 15 | 5.71 | 1.47 | -0.26 | -0.17 | AcpcNH-DmaaBoc              | -0.26  | 3.66 | 1.47 | 5.7  | -0.26 | -0.17 | 16 | 4.47 | 2.94 | -0.13 | -0.09 | DProHA-DProHD1              | -0.135 | 3.21 | 2.94 | 4.47 | -0.14 | -0.09 | 17 | 4.48 | 1.82 | -0.11 | -0.07 | DProHA-DmaaNMe <sub>2</sub> | -0.115 | 3.93 | 1.82 | 4.48 | -0.12 | -0.08 | 18 | 4.27 | 1.47 | -0.29 | -0.18 | GlyHA2-DmaaBoc              | -0.305 | 3.58 | 1.47 | 4.28 | -0.32 | -0.21 |    |      |      |       |       |                |        |      |
| 3  | 7.72 | 5.7  | -0.02      | -0.01    | AcpcNH-DmaaNH               | -0.025                    | 4.13                             |    |      |      |       |       |                             |        |      |      |      |       |       |    |      |      |       |       |                             |        |      |      |      |       |       |    |      |      |       |       |                             |        |      |      |      |       |       |    |      |      |       |       |                             |        |      |      |      |       |       |    |      |      |       |       |                             |        |      |      |      |       |       |    |      |      |       |       |                             |        |      |      |      |       |       |    |      |      |       |       |                             |        |      |      |      |       |       |    |      |      |       |       |                             |        |      |      |      |       |       |    |      |      |       |       |                             |        |      |      |      |       |       |    |      |      |       |       |                             |        |      |      |      |       |       |    |      |      |       |       |                             |        |      |      |      |       |       |    |      |      |       |       |                             |        |      |      |      |       |       |    |      |      |       |       |                             |        |      |      |      |       |       |    |      |      |       |       |                             |        |      |      |      |       |       |    |      |      |       |       |                             |        |      |      |      |       |       |    |      |      |       |       |                             |        |      |      |      |       |       |    |      |      |       |       |                |        |      |
|    | 5.7  | 7.71 | -0.03      | -0.02    |                             |                           |                                  | 4  | 7.71 | 4.47 | -0.86 | -0.55 | AcpcNH-DProHA               | -0.86  | 2.31 | 4.47 | 7.71 | -0.86 | -0.55 | 5  | 7.71 | 4.11 | -0.09 | -0.06 | AcpcNH-DmaaHA               | -0.085 | 3.42 | 4.1  | 7.71 | -0.08 | -0.05 | 6  | 7.71 | 3.6  | -0.48 | -0.31 | AcpcNH-DProHD               | -0.485 | 2.55 | 3.6  | 7.71 | -0.49 | -0.32 | 7  | 7.71 | 2.16 | -0.03 | -0.02 | AcpcNH-AcpcHB2b             | -0.03  | 4.04 | 2.16 | 7.71 | -0.03 | -0.02 | 8  | 7.71 | 1.9  | -0.14 | -0.09 | AcpcNH-DProHB2              | -0.135 | 3.80 | 1.89 | 7.71 | -0.13 | -0.09 | 9  | 7.71 | 1.72 | -0.04 | -0.02 | AcpcNH-DProHB1              | -0.045 | 3.81 | 1.72 | 7.71 | -0.05 | -0.03 | 10 | 7.71 | 1.09 | -0.85 | -0.55 | AcpcNH-AcpcHB2a             | -0.86  | 2.32 | 1.09 | 7.71 | -0.87 | -0.56 | 11 | 7.71 | 1.51 | -0.13 | -0.08 | AcpcNH-DProHG               | -0.13  | 3.07 | 1.51 | 7.71 | -0.13 | -0.09 | 12 | 5.7  | 2.43 | -1.01 | -0.65 | AcpcNH-AcpcHB1a             | -1.01  | 2.26 | 2.43 | 5.7  | -1.01 | -0.65 | 13 | 5.7  | 2.07 | -0.29 | -0.19 | DmaaNH-DmaaHB1              | -0.295 | 2.81 | 2.07 | 5.71 | -0.3  | -0.19 | 14 | 5.7  | 1.82 | -0.31 | -0.2  | AcpcNH-DmaaNMe <sub>2</sub> | -0.315 | 3.31 | 1.82 | 5.7  | -0.32 | -0.21 | 15 | 5.71 | 1.47 | -0.26 | -0.17 | AcpcNH-DmaaBoc              | -0.26  | 3.66 | 1.47 | 5.7  | -0.26 | -0.17 | 16 | 4.47 | 2.94 | -0.13 | -0.09 | DProHA-DProHD1              | -0.135 | 3.21 | 2.94 | 4.47 | -0.14 | -0.09 | 17 | 4.48 | 1.82 | -0.11 | -0.07 | DProHA-DmaaNMe <sub>2</sub> | -0.115 | 3.93 | 1.82 | 4.48 | -0.12 | -0.08 | 18 | 4.27 | 1.47 | -0.29 | -0.18 | GlyHA2-DmaaBoc              | -0.305 | 3.58 | 1.47 | 4.28 | -0.32 | -0.21 |    |      |      |       |       |                             |        |      |      |      |       |       |    |      |      |       |       |                |        |      |
| 4  | 7.71 | 4.47 | -0.86      | -0.55    | AcpcNH-DProHA               | -0.86                     | 2.31                             |    |      |      |       |       |                             |        |      |      |      |       |       |    |      |      |       |       |                             |        |      |      |      |       |       |    |      |      |       |       |                             |        |      |      |      |       |       |    |      |      |       |       |                             |        |      |      |      |       |       |    |      |      |       |       |                             |        |      |      |      |       |       |    |      |      |       |       |                             |        |      |      |      |       |       |    |      |      |       |       |                             |        |      |      |      |       |       |    |      |      |       |       |                             |        |      |      |      |       |       |    |      |      |       |       |                             |        |      |      |      |       |       |    |      |      |       |       |                             |        |      |      |      |       |       |    |      |      |       |       |                             |        |      |      |      |       |       |    |      |      |       |       |                             |        |      |      |      |       |       |    |      |      |       |       |                             |        |      |      |      |       |       |    |      |      |       |       |                             |        |      |      |      |       |       |    |      |      |       |       |                             |        |      |      |      |       |       |    |      |      |       |       |                             |        |      |      |      |       |       |    |      |      |       |       |                |        |      |
|    | 4.47 | 7.71 | -0.86      | -0.55    |                             |                           |                                  | 5  | 7.71 | 4.11 | -0.09 | -0.06 | AcpcNH-DmaaHA               | -0.085 | 3.42 | 4.1  | 7.71 | -0.08 | -0.05 | 6  | 7.71 | 3.6  | -0.48 | -0.31 | AcpcNH-DProHD               | -0.485 | 2.55 | 3.6  | 7.71 | -0.49 | -0.32 | 7  | 7.71 | 2.16 | -0.03 | -0.02 | AcpcNH-AcpcHB2b             | -0.03  | 4.04 | 2.16 | 7.71 | -0.03 | -0.02 | 8  | 7.71 | 1.9  | -0.14 | -0.09 | AcpcNH-DProHB2              | -0.135 | 3.80 | 1.89 | 7.71 | -0.13 | -0.09 | 9  | 7.71 | 1.72 | -0.04 | -0.02 | AcpcNH-DProHB1              | -0.045 | 3.81 | 1.72 | 7.71 | -0.05 | -0.03 | 10 | 7.71 | 1.09 | -0.85 | -0.55 | AcpcNH-AcpcHB2a             | -0.86  | 2.32 | 1.09 | 7.71 | -0.87 | -0.56 | 11 | 7.71 | 1.51 | -0.13 | -0.08 | AcpcNH-DProHG               | -0.13  | 3.07 | 1.51 | 7.71 | -0.13 | -0.09 | 12 | 5.7  | 2.43 | -1.01 | -0.65 | AcpcNH-AcpcHB1a             | -1.01  | 2.26 | 2.43 | 5.7  | -1.01 | -0.65 | 13 | 5.7  | 2.07 | -0.29 | -0.19 | DmaaNH-DmaaHB1              | -0.295 | 2.81 | 2.07 | 5.71 | -0.3  | -0.19 | 14 | 5.7  | 1.82 | -0.31 | -0.2  | AcpcNH-DmaaNMe <sub>2</sub> | -0.315 | 3.31 | 1.82 | 5.7  | -0.32 | -0.21 | 15 | 5.71 | 1.47 | -0.26 | -0.17 | AcpcNH-DmaaBoc              | -0.26  | 3.66 | 1.47 | 5.7  | -0.26 | -0.17 | 16 | 4.47 | 2.94 | -0.13 | -0.09 | DProHA-DProHD1              | -0.135 | 3.21 | 2.94 | 4.47 | -0.14 | -0.09 | 17 | 4.48 | 1.82 | -0.11 | -0.07 | DProHA-DmaaNMe <sub>2</sub> | -0.115 | 3.93 | 1.82 | 4.48 | -0.12 | -0.08 | 18 | 4.27 | 1.47 | -0.29 | -0.18 | GlyHA2-DmaaBoc              | -0.305 | 3.58 | 1.47 | 4.28 | -0.32 | -0.21 |    |      |      |       |       |                             |        |      |      |      |       |       |    |      |      |       |       |                             |        |      |      |      |       |       |    |      |      |       |       |                |        |      |
| 5  | 7.71 | 4.11 | -0.09      | -0.06    | AcpcNH-DmaaHA               | -0.085                    | 3.42                             |    |      |      |       |       |                             |        |      |      |      |       |       |    |      |      |       |       |                             |        |      |      |      |       |       |    |      |      |       |       |                             |        |      |      |      |       |       |    |      |      |       |       |                             |        |      |      |      |       |       |    |      |      |       |       |                             |        |      |      |      |       |       |    |      |      |       |       |                             |        |      |      |      |       |       |    |      |      |       |       |                             |        |      |      |      |       |       |    |      |      |       |       |                             |        |      |      |      |       |       |    |      |      |       |       |                             |        |      |      |      |       |       |    |      |      |       |       |                             |        |      |      |      |       |       |    |      |      |       |       |                             |        |      |      |      |       |       |    |      |      |       |       |                             |        |      |      |      |       |       |    |      |      |       |       |                             |        |      |      |      |       |       |    |      |      |       |       |                             |        |      |      |      |       |       |    |      |      |       |       |                             |        |      |      |      |       |       |    |      |      |       |       |                             |        |      |      |      |       |       |    |      |      |       |       |                |        |      |
|    | 4.1  | 7.71 | -0.08      | -0.05    |                             |                           |                                  | 6  | 7.71 | 3.6  | -0.48 | -0.31 | AcpcNH-DProHD               | -0.485 | 2.55 | 3.6  | 7.71 | -0.49 | -0.32 | 7  | 7.71 | 2.16 | -0.03 | -0.02 | AcpcNH-AcpcHB2b             | -0.03  | 4.04 | 2.16 | 7.71 | -0.03 | -0.02 | 8  | 7.71 | 1.9  | -0.14 | -0.09 | AcpcNH-DProHB2              | -0.135 | 3.80 | 1.89 | 7.71 | -0.13 | -0.09 | 9  | 7.71 | 1.72 | -0.04 | -0.02 | AcpcNH-DProHB1              | -0.045 | 3.81 | 1.72 | 7.71 | -0.05 | -0.03 | 10 | 7.71 | 1.09 | -0.85 | -0.55 | AcpcNH-AcpcHB2a             | -0.86  | 2.32 | 1.09 | 7.71 | -0.87 | -0.56 | 11 | 7.71 | 1.51 | -0.13 | -0.08 | AcpcNH-DProHG               | -0.13  | 3.07 | 1.51 | 7.71 | -0.13 | -0.09 | 12 | 5.7  | 2.43 | -1.01 | -0.65 | AcpcNH-AcpcHB1a             | -1.01  | 2.26 | 2.43 | 5.7  | -1.01 | -0.65 | 13 | 5.7  | 2.07 | -0.29 | -0.19 | DmaaNH-DmaaHB1              | -0.295 | 2.81 | 2.07 | 5.71 | -0.3  | -0.19 | 14 | 5.7  | 1.82 | -0.31 | -0.2  | AcpcNH-DmaaNMe <sub>2</sub> | -0.315 | 3.31 | 1.82 | 5.7  | -0.32 | -0.21 | 15 | 5.71 | 1.47 | -0.26 | -0.17 | AcpcNH-DmaaBoc              | -0.26  | 3.66 | 1.47 | 5.7  | -0.26 | -0.17 | 16 | 4.47 | 2.94 | -0.13 | -0.09 | DProHA-DProHD1              | -0.135 | 3.21 | 2.94 | 4.47 | -0.14 | -0.09 | 17 | 4.48 | 1.82 | -0.11 | -0.07 | DProHA-DmaaNMe <sub>2</sub> | -0.115 | 3.93 | 1.82 | 4.48 | -0.12 | -0.08 | 18 | 4.27 | 1.47 | -0.29 | -0.18 | GlyHA2-DmaaBoc              | -0.305 | 3.58 | 1.47 | 4.28 | -0.32 | -0.21 |    |      |      |       |       |                             |        |      |      |      |       |       |    |      |      |       |       |                             |        |      |      |      |       |       |    |      |      |       |       |                             |        |      |      |      |       |       |    |      |      |       |       |                |        |      |
| 6  | 7.71 | 3.6  | -0.48      | -0.31    | AcpcNH-DProHD               | -0.485                    | 2.55                             |    |      |      |       |       |                             |        |      |      |      |       |       |    |      |      |       |       |                             |        |      |      |      |       |       |    |      |      |       |       |                             |        |      |      |      |       |       |    |      |      |       |       |                             |        |      |      |      |       |       |    |      |      |       |       |                             |        |      |      |      |       |       |    |      |      |       |       |                             |        |      |      |      |       |       |    |      |      |       |       |                             |        |      |      |      |       |       |    |      |      |       |       |                             |        |      |      |      |       |       |    |      |      |       |       |                             |        |      |      |      |       |       |    |      |      |       |       |                             |        |      |      |      |       |       |    |      |      |       |       |                             |        |      |      |      |       |       |    |      |      |       |       |                             |        |      |      |      |       |       |    |      |      |       |       |                             |        |      |      |      |       |       |    |      |      |       |       |                             |        |      |      |      |       |       |    |      |      |       |       |                             |        |      |      |      |       |       |    |      |      |       |       |                             |        |      |      |      |       |       |    |      |      |       |       |                |        |      |
|    | 3.6  | 7.71 | -0.49      | -0.32    |                             |                           |                                  | 7  | 7.71 | 2.16 | -0.03 | -0.02 | AcpcNH-AcpcHB2b             | -0.03  | 4.04 | 2.16 | 7.71 | -0.03 | -0.02 | 8  | 7.71 | 1.9  | -0.14 | -0.09 | AcpcNH-DProHB2              | -0.135 | 3.80 | 1.89 | 7.71 | -0.13 | -0.09 | 9  | 7.71 | 1.72 | -0.04 | -0.02 | AcpcNH-DProHB1              | -0.045 | 3.81 | 1.72 | 7.71 | -0.05 | -0.03 | 10 | 7.71 | 1.09 | -0.85 | -0.55 | AcpcNH-AcpcHB2a             | -0.86  | 2.32 | 1.09 | 7.71 | -0.87 | -0.56 | 11 | 7.71 | 1.51 | -0.13 | -0.08 | AcpcNH-DProHG               | -0.13  | 3.07 | 1.51 | 7.71 | -0.13 | -0.09 | 12 | 5.7  | 2.43 | -1.01 | -0.65 | AcpcNH-AcpcHB1a             | -1.01  | 2.26 | 2.43 | 5.7  | -1.01 | -0.65 | 13 | 5.7  | 2.07 | -0.29 | -0.19 | DmaaNH-DmaaHB1              | -0.295 | 2.81 | 2.07 | 5.71 | -0.3  | -0.19 | 14 | 5.7  | 1.82 | -0.31 | -0.2  | AcpcNH-DmaaNMe <sub>2</sub> | -0.315 | 3.31 | 1.82 | 5.7  | -0.32 | -0.21 | 15 | 5.71 | 1.47 | -0.26 | -0.17 | AcpcNH-DmaaBoc              | -0.26  | 3.66 | 1.47 | 5.7  | -0.26 | -0.17 | 16 | 4.47 | 2.94 | -0.13 | -0.09 | DProHA-DProHD1              | -0.135 | 3.21 | 2.94 | 4.47 | -0.14 | -0.09 | 17 | 4.48 | 1.82 | -0.11 | -0.07 | DProHA-DmaaNMe <sub>2</sub> | -0.115 | 3.93 | 1.82 | 4.48 | -0.12 | -0.08 | 18 | 4.27 | 1.47 | -0.29 | -0.18 | GlyHA2-DmaaBoc              | -0.305 | 3.58 | 1.47 | 4.28 | -0.32 | -0.21 |    |      |      |       |       |                             |        |      |      |      |       |       |    |      |      |       |       |                             |        |      |      |      |       |       |    |      |      |       |       |                             |        |      |      |      |       |       |    |      |      |       |       |                             |        |      |      |      |       |       |    |      |      |       |       |                |        |      |
| 7  | 7.71 | 2.16 | -0.03      | -0.02    | AcpcNH-AcpcHB2b             | -0.03                     | 4.04                             |    |      |      |       |       |                             |        |      |      |      |       |       |    |      |      |       |       |                             |        |      |      |      |       |       |    |      |      |       |       |                             |        |      |      |      |       |       |    |      |      |       |       |                             |        |      |      |      |       |       |    |      |      |       |       |                             |        |      |      |      |       |       |    |      |      |       |       |                             |        |      |      |      |       |       |    |      |      |       |       |                             |        |      |      |      |       |       |    |      |      |       |       |                             |        |      |      |      |       |       |    |      |      |       |       |                             |        |      |      |      |       |       |    |      |      |       |       |                             |        |      |      |      |       |       |    |      |      |       |       |                             |        |      |      |      |       |       |    |      |      |       |       |                             |        |      |      |      |       |       |    |      |      |       |       |                             |        |      |      |      |       |       |    |      |      |       |       |                             |        |      |      |      |       |       |    |      |      |       |       |                             |        |      |      |      |       |       |    |      |      |       |       |                             |        |      |      |      |       |       |    |      |      |       |       |                |        |      |
|    | 2.16 | 7.71 | -0.03      | -0.02    |                             |                           |                                  | 8  | 7.71 | 1.9  | -0.14 | -0.09 | AcpcNH-DProHB2              | -0.135 | 3.80 | 1.89 | 7.71 | -0.13 | -0.09 | 9  | 7.71 | 1.72 | -0.04 | -0.02 | AcpcNH-DProHB1              | -0.045 | 3.81 | 1.72 | 7.71 | -0.05 | -0.03 | 10 | 7.71 | 1.09 | -0.85 | -0.55 | AcpcNH-AcpcHB2a             | -0.86  | 2.32 | 1.09 | 7.71 | -0.87 | -0.56 | 11 | 7.71 | 1.51 | -0.13 | -0.08 | AcpcNH-DProHG               | -0.13  | 3.07 | 1.51 | 7.71 | -0.13 | -0.09 | 12 | 5.7  | 2.43 | -1.01 | -0.65 | AcpcNH-AcpcHB1a             | -1.01  | 2.26 | 2.43 | 5.7  | -1.01 | -0.65 | 13 | 5.7  | 2.07 | -0.29 | -0.19 | DmaaNH-DmaaHB1              | -0.295 | 2.81 | 2.07 | 5.71 | -0.3  | -0.19 | 14 | 5.7  | 1.82 | -0.31 | -0.2  | AcpcNH-DmaaNMe <sub>2</sub> | -0.315 | 3.31 | 1.82 | 5.7  | -0.32 | -0.21 | 15 | 5.71 | 1.47 | -0.26 | -0.17 | AcpcNH-DmaaBoc              | -0.26  | 3.66 | 1.47 | 5.7  | -0.26 | -0.17 | 16 | 4.47 | 2.94 | -0.13 | -0.09 | DProHA-DProHD1              | -0.135 | 3.21 | 2.94 | 4.47 | -0.14 | -0.09 | 17 | 4.48 | 1.82 | -0.11 | -0.07 | DProHA-DmaaNMe <sub>2</sub> | -0.115 | 3.93 | 1.82 | 4.48 | -0.12 | -0.08 | 18 | 4.27 | 1.47 | -0.29 | -0.18 | GlyHA2-DmaaBoc              | -0.305 | 3.58 | 1.47 | 4.28 | -0.32 | -0.21 |    |      |      |       |       |                             |        |      |      |      |       |       |    |      |      |       |       |                             |        |      |      |      |       |       |    |      |      |       |       |                             |        |      |      |      |       |       |    |      |      |       |       |                             |        |      |      |      |       |       |    |      |      |       |       |                             |        |      |      |      |       |       |    |      |      |       |       |                |        |      |
| 8  | 7.71 | 1.9  | -0.14      | -0.09    | AcpcNH-DProHB2              | -0.135                    | 3.80                             |    |      |      |       |       |                             |        |      |      |      |       |       |    |      |      |       |       |                             |        |      |      |      |       |       |    |      |      |       |       |                             |        |      |      |      |       |       |    |      |      |       |       |                             |        |      |      |      |       |       |    |      |      |       |       |                             |        |      |      |      |       |       |    |      |      |       |       |                             |        |      |      |      |       |       |    |      |      |       |       |                             |        |      |      |      |       |       |    |      |      |       |       |                             |        |      |      |      |       |       |    |      |      |       |       |                             |        |      |      |      |       |       |    |      |      |       |       |                             |        |      |      |      |       |       |    |      |      |       |       |                             |        |      |      |      |       |       |    |      |      |       |       |                             |        |      |      |      |       |       |    |      |      |       |       |                             |        |      |      |      |       |       |    |      |      |       |       |                             |        |      |      |      |       |       |    |      |      |       |       |                             |        |      |      |      |       |       |    |      |      |       |       |                             |        |      |      |      |       |       |    |      |      |       |       |                |        |      |
|    | 1.89 | 7.71 | -0.13      | -0.09    |                             |                           |                                  | 9  | 7.71 | 1.72 | -0.04 | -0.02 | AcpcNH-DProHB1              | -0.045 | 3.81 | 1.72 | 7.71 | -0.05 | -0.03 | 10 | 7.71 | 1.09 | -0.85 | -0.55 | AcpcNH-AcpcHB2a             | -0.86  | 2.32 | 1.09 | 7.71 | -0.87 | -0.56 | 11 | 7.71 | 1.51 | -0.13 | -0.08 | AcpcNH-DProHG               | -0.13  | 3.07 | 1.51 | 7.71 | -0.13 | -0.09 | 12 | 5.7  | 2.43 | -1.01 | -0.65 | AcpcNH-AcpcHB1a             | -1.01  | 2.26 | 2.43 | 5.7  | -1.01 | -0.65 | 13 | 5.7  | 2.07 | -0.29 | -0.19 | DmaaNH-DmaaHB1              | -0.295 | 2.81 | 2.07 | 5.71 | -0.3  | -0.19 | 14 | 5.7  | 1.82 | -0.31 | -0.2  | AcpcNH-DmaaNMe <sub>2</sub> | -0.315 | 3.31 | 1.82 | 5.7  | -0.32 | -0.21 | 15 | 5.71 | 1.47 | -0.26 | -0.17 | AcpcNH-DmaaBoc              | -0.26  | 3.66 | 1.47 | 5.7  | -0.26 | -0.17 | 16 | 4.47 | 2.94 | -0.13 | -0.09 | DProHA-DProHD1              | -0.135 | 3.21 | 2.94 | 4.47 | -0.14 | -0.09 | 17 | 4.48 | 1.82 | -0.11 | -0.07 | DProHA-DmaaNMe <sub>2</sub> | -0.115 | 3.93 | 1.82 | 4.48 | -0.12 | -0.08 | 18 | 4.27 | 1.47 | -0.29 | -0.18 | GlyHA2-DmaaBoc              | -0.305 | 3.58 | 1.47 | 4.28 | -0.32 | -0.21 |    |      |      |       |       |                             |        |      |      |      |       |       |    |      |      |       |       |                             |        |      |      |      |       |       |    |      |      |       |       |                             |        |      |      |      |       |       |    |      |      |       |       |                             |        |      |      |      |       |       |    |      |      |       |       |                             |        |      |      |      |       |       |    |      |      |       |       |                             |        |      |      |      |       |       |    |      |      |       |       |                |        |      |
| 9  | 7.71 | 1.72 | -0.04      | -0.02    | AcpcNH-DProHB1              | -0.045                    | 3.81                             |    |      |      |       |       |                             |        |      |      |      |       |       |    |      |      |       |       |                             |        |      |      |      |       |       |    |      |      |       |       |                             |        |      |      |      |       |       |    |      |      |       |       |                             |        |      |      |      |       |       |    |      |      |       |       |                             |        |      |      |      |       |       |    |      |      |       |       |                             |        |      |      |      |       |       |    |      |      |       |       |                             |        |      |      |      |       |       |    |      |      |       |       |                             |        |      |      |      |       |       |    |      |      |       |       |                             |        |      |      |      |       |       |    |      |      |       |       |                             |        |      |      |      |       |       |    |      |      |       |       |                             |        |      |      |      |       |       |    |      |      |       |       |                             |        |      |      |      |       |       |    |      |      |       |       |                             |        |      |      |      |       |       |    |      |      |       |       |                             |        |      |      |      |       |       |    |      |      |       |       |                             |        |      |      |      |       |       |    |      |      |       |       |                             |        |      |      |      |       |       |    |      |      |       |       |                |        |      |
|    | 1.72 | 7.71 | -0.05      | -0.03    |                             |                           |                                  | 10 | 7.71 | 1.09 | -0.85 | -0.55 | AcpcNH-AcpcHB2a             | -0.86  | 2.32 | 1.09 | 7.71 | -0.87 | -0.56 | 11 | 7.71 | 1.51 | -0.13 | -0.08 | AcpcNH-DProHG               | -0.13  | 3.07 | 1.51 | 7.71 | -0.13 | -0.09 | 12 | 5.7  | 2.43 | -1.01 | -0.65 | AcpcNH-AcpcHB1a             | -1.01  | 2.26 | 2.43 | 5.7  | -1.01 | -0.65 | 13 | 5.7  | 2.07 | -0.29 | -0.19 | DmaaNH-DmaaHB1              | -0.295 | 2.81 | 2.07 | 5.71 | -0.3  | -0.19 | 14 | 5.7  | 1.82 | -0.31 | -0.2  | AcpcNH-DmaaNMe <sub>2</sub> | -0.315 | 3.31 | 1.82 | 5.7  | -0.32 | -0.21 | 15 | 5.71 | 1.47 | -0.26 | -0.17 | AcpcNH-DmaaBoc              | -0.26  | 3.66 | 1.47 | 5.7  | -0.26 | -0.17 | 16 | 4.47 | 2.94 | -0.13 | -0.09 | DProHA-DProHD1              | -0.135 | 3.21 | 2.94 | 4.47 | -0.14 | -0.09 | 17 | 4.48 | 1.82 | -0.11 | -0.07 | DProHA-DmaaNMe <sub>2</sub> | -0.115 | 3.93 | 1.82 | 4.48 | -0.12 | -0.08 | 18 | 4.27 | 1.47 | -0.29 | -0.18 | GlyHA2-DmaaBoc              | -0.305 | 3.58 | 1.47 | 4.28 | -0.32 | -0.21 |    |      |      |       |       |                             |        |      |      |      |       |       |    |      |      |       |       |                             |        |      |      |      |       |       |    |      |      |       |       |                             |        |      |      |      |       |       |    |      |      |       |       |                             |        |      |      |      |       |       |    |      |      |       |       |                             |        |      |      |      |       |       |    |      |      |       |       |                             |        |      |      |      |       |       |    |      |      |       |       |                             |        |      |      |      |       |       |    |      |      |       |       |                |        |      |
| 10 | 7.71 | 1.09 | -0.85      | -0.55    | AcpcNH-AcpcHB2a             | -0.86                     | 2.32                             |    |      |      |       |       |                             |        |      |      |      |       |       |    |      |      |       |       |                             |        |      |      |      |       |       |    |      |      |       |       |                             |        |      |      |      |       |       |    |      |      |       |       |                             |        |      |      |      |       |       |    |      |      |       |       |                             |        |      |      |      |       |       |    |      |      |       |       |                             |        |      |      |      |       |       |    |      |      |       |       |                             |        |      |      |      |       |       |    |      |      |       |       |                             |        |      |      |      |       |       |    |      |      |       |       |                             |        |      |      |      |       |       |    |      |      |       |       |                             |        |      |      |      |       |       |    |      |      |       |       |                             |        |      |      |      |       |       |    |      |      |       |       |                             |        |      |      |      |       |       |    |      |      |       |       |                             |        |      |      |      |       |       |    |      |      |       |       |                             |        |      |      |      |       |       |    |      |      |       |       |                             |        |      |      |      |       |       |    |      |      |       |       |                             |        |      |      |      |       |       |    |      |      |       |       |                |        |      |
|    | 1.09 | 7.71 | -0.87      | -0.56    |                             |                           |                                  | 11 | 7.71 | 1.51 | -0.13 | -0.08 | AcpcNH-DProHG               | -0.13  | 3.07 | 1.51 | 7.71 | -0.13 | -0.09 | 12 | 5.7  | 2.43 | -1.01 | -0.65 | AcpcNH-AcpcHB1a             | -1.01  | 2.26 | 2.43 | 5.7  | -1.01 | -0.65 | 13 | 5.7  | 2.07 | -0.29 | -0.19 | DmaaNH-DmaaHB1              | -0.295 | 2.81 | 2.07 | 5.71 | -0.3  | -0.19 | 14 | 5.7  | 1.82 | -0.31 | -0.2  | AcpcNH-DmaaNMe <sub>2</sub> | -0.315 | 3.31 | 1.82 | 5.7  | -0.32 | -0.21 | 15 | 5.71 | 1.47 | -0.26 | -0.17 | AcpcNH-DmaaBoc              | -0.26  | 3.66 | 1.47 | 5.7  | -0.26 | -0.17 | 16 | 4.47 | 2.94 | -0.13 | -0.09 | DProHA-DProHD1              | -0.135 | 3.21 | 2.94 | 4.47 | -0.14 | -0.09 | 17 | 4.48 | 1.82 | -0.11 | -0.07 | DProHA-DmaaNMe <sub>2</sub> | -0.115 | 3.93 | 1.82 | 4.48 | -0.12 | -0.08 | 18 | 4.27 | 1.47 | -0.29 | -0.18 | GlyHA2-DmaaBoc              | -0.305 | 3.58 | 1.47 | 4.28 | -0.32 | -0.21 |    |      |      |       |       |                             |        |      |      |      |       |       |    |      |      |       |       |                             |        |      |      |      |       |       |    |      |      |       |       |                             |        |      |      |      |       |       |    |      |      |       |       |                             |        |      |      |      |       |       |    |      |      |       |       |                             |        |      |      |      |       |       |    |      |      |       |       |                             |        |      |      |      |       |       |    |      |      |       |       |                             |        |      |      |      |       |       |    |      |      |       |       |                             |        |      |      |      |       |       |    |      |      |       |       |                |        |      |
| 11 | 7.71 | 1.51 | -0.13      | -0.08    | AcpcNH-DProHG               | -0.13                     | 3.07                             |    |      |      |       |       |                             |        |      |      |      |       |       |    |      |      |       |       |                             |        |      |      |      |       |       |    |      |      |       |       |                             |        |      |      |      |       |       |    |      |      |       |       |                             |        |      |      |      |       |       |    |      |      |       |       |                             |        |      |      |      |       |       |    |      |      |       |       |                             |        |      |      |      |       |       |    |      |      |       |       |                             |        |      |      |      |       |       |    |      |      |       |       |                             |        |      |      |      |       |       |    |      |      |       |       |                             |        |      |      |      |       |       |    |      |      |       |       |                             |        |      |      |      |       |       |    |      |      |       |       |                             |        |      |      |      |       |       |    |      |      |       |       |                             |        |      |      |      |       |       |    |      |      |       |       |                             |        |      |      |      |       |       |    |      |      |       |       |                             |        |      |      |      |       |       |    |      |      |       |       |                             |        |      |      |      |       |       |    |      |      |       |       |                             |        |      |      |      |       |       |    |      |      |       |       |                |        |      |
|    | 1.51 | 7.71 | -0.13      | -0.09    |                             |                           |                                  | 12 | 5.7  | 2.43 | -1.01 | -0.65 | AcpcNH-AcpcHB1a             | -1.01  | 2.26 | 2.43 | 5.7  | -1.01 | -0.65 | 13 | 5.7  | 2.07 | -0.29 | -0.19 | DmaaNH-DmaaHB1              | -0.295 | 2.81 | 2.07 | 5.71 | -0.3  | -0.19 | 14 | 5.7  | 1.82 | -0.31 | -0.2  | AcpcNH-DmaaNMe <sub>2</sub> | -0.315 | 3.31 | 1.82 | 5.7  | -0.32 | -0.21 | 15 | 5.71 | 1.47 | -0.26 | -0.17 | AcpcNH-DmaaBoc              | -0.26  | 3.66 | 1.47 | 5.7  | -0.26 | -0.17 | 16 | 4.47 | 2.94 | -0.13 | -0.09 | DProHA-DProHD1              | -0.135 | 3.21 | 2.94 | 4.47 | -0.14 | -0.09 | 17 | 4.48 | 1.82 | -0.11 | -0.07 | DProHA-DmaaNMe <sub>2</sub> | -0.115 | 3.93 | 1.82 | 4.48 | -0.12 | -0.08 | 18 | 4.27 | 1.47 | -0.29 | -0.18 | GlyHA2-DmaaBoc              | -0.305 | 3.58 | 1.47 | 4.28 | -0.32 | -0.21 |    |      |      |       |       |                             |        |      |      |      |       |       |    |      |      |       |       |                             |        |      |      |      |       |       |    |      |      |       |       |                             |        |      |      |      |       |       |    |      |      |       |       |                             |        |      |      |      |       |       |    |      |      |       |       |                             |        |      |      |      |       |       |    |      |      |       |       |                             |        |      |      |      |       |       |    |      |      |       |       |                             |        |      |      |      |       |       |    |      |      |       |       |                             |        |      |      |      |       |       |    |      |      |       |       |                             |        |      |      |      |       |       |    |      |      |       |       |                |        |      |
| 12 | 5.7  | 2.43 | -1.01      | -0.65    | AcpcNH-AcpcHB1a             | -1.01                     | 2.26                             |    |      |      |       |       |                             |        |      |      |      |       |       |    |      |      |       |       |                             |        |      |      |      |       |       |    |      |      |       |       |                             |        |      |      |      |       |       |    |      |      |       |       |                             |        |      |      |      |       |       |    |      |      |       |       |                             |        |      |      |      |       |       |    |      |      |       |       |                             |        |      |      |      |       |       |    |      |      |       |       |                             |        |      |      |      |       |       |    |      |      |       |       |                             |        |      |      |      |       |       |    |      |      |       |       |                             |        |      |      |      |       |       |    |      |      |       |       |                             |        |      |      |      |       |       |    |      |      |       |       |                             |        |      |      |      |       |       |    |      |      |       |       |                             |        |      |      |      |       |       |    |      |      |       |       |                             |        |      |      |      |       |       |    |      |      |       |       |                             |        |      |      |      |       |       |    |      |      |       |       |                             |        |      |      |      |       |       |    |      |      |       |       |                             |        |      |      |      |       |       |    |      |      |       |       |                |        |      |
|    | 2.43 | 5.7  | -1.01      | -0.65    |                             |                           |                                  | 13 | 5.7  | 2.07 | -0.29 | -0.19 | DmaaNH-DmaaHB1              | -0.295 | 2.81 | 2.07 | 5.71 | -0.3  | -0.19 | 14 | 5.7  | 1.82 | -0.31 | -0.2  | AcpcNH-DmaaNMe <sub>2</sub> | -0.315 | 3.31 | 1.82 | 5.7  | -0.32 | -0.21 | 15 | 5.71 | 1.47 | -0.26 | -0.17 | AcpcNH-DmaaBoc              | -0.26  | 3.66 | 1.47 | 5.7  | -0.26 | -0.17 | 16 | 4.47 | 2.94 | -0.13 | -0.09 | DProHA-DProHD1              | -0.135 | 3.21 | 2.94 | 4.47 | -0.14 | -0.09 | 17 | 4.48 | 1.82 | -0.11 | -0.07 | DProHA-DmaaNMe <sub>2</sub> | -0.115 | 3.93 | 1.82 | 4.48 | -0.12 | -0.08 | 18 | 4.27 | 1.47 | -0.29 | -0.18 | GlyHA2-DmaaBoc              | -0.305 | 3.58 | 1.47 | 4.28 | -0.32 | -0.21 |    |      |      |       |       |                             |        |      |      |      |       |       |    |      |      |       |       |                             |        |      |      |      |       |       |    |      |      |       |       |                             |        |      |      |      |       |       |    |      |      |       |       |                             |        |      |      |      |       |       |    |      |      |       |       |                             |        |      |      |      |       |       |    |      |      |       |       |                             |        |      |      |      |       |       |    |      |      |       |       |                             |        |      |      |      |       |       |    |      |      |       |       |                             |        |      |      |      |       |       |    |      |      |       |       |                             |        |      |      |      |       |       |    |      |      |       |       |                             |        |      |      |      |       |       |    |      |      |       |       |                |        |      |
| 13 | 5.7  | 2.07 | -0.29      | -0.19    | DmaaNH-DmaaHB1              | -0.295                    | 2.81                             |    |      |      |       |       |                             |        |      |      |      |       |       |    |      |      |       |       |                             |        |      |      |      |       |       |    |      |      |       |       |                             |        |      |      |      |       |       |    |      |      |       |       |                             |        |      |      |      |       |       |    |      |      |       |       |                             |        |      |      |      |       |       |    |      |      |       |       |                             |        |      |      |      |       |       |    |      |      |       |       |                             |        |      |      |      |       |       |    |      |      |       |       |                             |        |      |      |      |       |       |    |      |      |       |       |                             |        |      |      |      |       |       |    |      |      |       |       |                             |        |      |      |      |       |       |    |      |      |       |       |                             |        |      |      |      |       |       |    |      |      |       |       |                             |        |      |      |      |       |       |    |      |      |       |       |                             |        |      |      |      |       |       |    |      |      |       |       |                             |        |      |      |      |       |       |    |      |      |       |       |                             |        |      |      |      |       |       |    |      |      |       |       |                             |        |      |      |      |       |       |    |      |      |       |       |                |        |      |
|    | 2.07 | 5.71 | -0.3       | -0.19    |                             |                           |                                  | 14 | 5.7  | 1.82 | -0.31 | -0.2  | AcpcNH-DmaaNMe <sub>2</sub> | -0.315 | 3.31 | 1.82 | 5.7  | -0.32 | -0.21 | 15 | 5.71 | 1.47 | -0.26 | -0.17 | AcpcNH-DmaaBoc              | -0.26  | 3.66 | 1.47 | 5.7  | -0.26 | -0.17 | 16 | 4.47 | 2.94 | -0.13 | -0.09 | DProHA-DProHD1              | -0.135 | 3.21 | 2.94 | 4.47 | -0.14 | -0.09 | 17 | 4.48 | 1.82 | -0.11 | -0.07 | DProHA-DmaaNMe <sub>2</sub> | -0.115 | 3.93 | 1.82 | 4.48 | -0.12 | -0.08 | 18 | 4.27 | 1.47 | -0.29 | -0.18 | GlyHA2-DmaaBoc              | -0.305 | 3.58 | 1.47 | 4.28 | -0.32 | -0.21 |    |      |      |       |       |                             |        |      |      |      |       |       |    |      |      |       |       |                             |        |      |      |      |       |       |    |      |      |       |       |                             |        |      |      |      |       |       |    |      |      |       |       |                             |        |      |      |      |       |       |    |      |      |       |       |                             |        |      |      |      |       |       |    |      |      |       |       |                             |        |      |      |      |       |       |    |      |      |       |       |                             |        |      |      |      |       |       |    |      |      |       |       |                             |        |      |      |      |       |       |    |      |      |       |       |                             |        |      |      |      |       |       |    |      |      |       |       |                             |        |      |      |      |       |       |    |      |      |       |       |                             |        |      |      |      |       |       |    |      |      |       |       |                |        |      |
| 14 | 5.7  | 1.82 | -0.31      | -0.2     | AcpcNH-DmaaNMe <sub>2</sub> | -0.315                    | 3.31                             |    |      |      |       |       |                             |        |      |      |      |       |       |    |      |      |       |       |                             |        |      |      |      |       |       |    |      |      |       |       |                             |        |      |      |      |       |       |    |      |      |       |       |                             |        |      |      |      |       |       |    |      |      |       |       |                             |        |      |      |      |       |       |    |      |      |       |       |                             |        |      |      |      |       |       |    |      |      |       |       |                             |        |      |      |      |       |       |    |      |      |       |       |                             |        |      |      |      |       |       |    |      |      |       |       |                             |        |      |      |      |       |       |    |      |      |       |       |                             |        |      |      |      |       |       |    |      |      |       |       |                             |        |      |      |      |       |       |    |      |      |       |       |                             |        |      |      |      |       |       |    |      |      |       |       |                             |        |      |      |      |       |       |    |      |      |       |       |                             |        |      |      |      |       |       |    |      |      |       |       |                             |        |      |      |      |       |       |    |      |      |       |       |                             |        |      |      |      |       |       |    |      |      |       |       |                |        |      |
|    | 1.82 | 5.7  | -0.32      | -0.21    |                             |                           |                                  | 15 | 5.71 | 1.47 | -0.26 | -0.17 | AcpcNH-DmaaBoc              | -0.26  | 3.66 | 1.47 | 5.7  | -0.26 | -0.17 | 16 | 4.47 | 2.94 | -0.13 | -0.09 | DProHA-DProHD1              | -0.135 | 3.21 | 2.94 | 4.47 | -0.14 | -0.09 | 17 | 4.48 | 1.82 | -0.11 | -0.07 | DProHA-DmaaNMe <sub>2</sub> | -0.115 | 3.93 | 1.82 | 4.48 | -0.12 | -0.08 | 18 | 4.27 | 1.47 | -0.29 | -0.18 | GlyHA2-DmaaBoc              | -0.305 | 3.58 | 1.47 | 4.28 | -0.32 | -0.21 |    |      |      |       |       |                             |        |      |      |      |       |       |    |      |      |       |       |                             |        |      |      |      |       |       |    |      |      |       |       |                             |        |      |      |      |       |       |    |      |      |       |       |                             |        |      |      |      |       |       |    |      |      |       |       |                             |        |      |      |      |       |       |    |      |      |       |       |                             |        |      |      |      |       |       |    |      |      |       |       |                             |        |      |      |      |       |       |    |      |      |       |       |                             |        |      |      |      |       |       |    |      |      |       |       |                             |        |      |      |      |       |       |    |      |      |       |       |                             |        |      |      |      |       |       |    |      |      |       |       |                             |        |      |      |      |       |       |    |      |      |       |       |                             |        |      |      |      |       |       |    |      |      |       |       |                |        |      |
| 15 | 5.71 | 1.47 | -0.26      | -0.17    | AcpcNH-DmaaBoc              | -0.26                     | 3.66                             |    |      |      |       |       |                             |        |      |      |      |       |       |    |      |      |       |       |                             |        |      |      |      |       |       |    |      |      |       |       |                             |        |      |      |      |       |       |    |      |      |       |       |                             |        |      |      |      |       |       |    |      |      |       |       |                             |        |      |      |      |       |       |    |      |      |       |       |                             |        |      |      |      |       |       |    |      |      |       |       |                             |        |      |      |      |       |       |    |      |      |       |       |                             |        |      |      |      |       |       |    |      |      |       |       |                             |        |      |      |      |       |       |    |      |      |       |       |                             |        |      |      |      |       |       |    |      |      |       |       |                             |        |      |      |      |       |       |    |      |      |       |       |                             |        |      |      |      |       |       |    |      |      |       |       |                             |        |      |      |      |       |       |    |      |      |       |       |                             |        |      |      |      |       |       |    |      |      |       |       |                             |        |      |      |      |       |       |    |      |      |       |       |                             |        |      |      |      |       |       |    |      |      |       |       |                |        |      |
|    | 1.47 | 5.7  | -0.26      | -0.17    |                             |                           |                                  | 16 | 4.47 | 2.94 | -0.13 | -0.09 | DProHA-DProHD1              | -0.135 | 3.21 | 2.94 | 4.47 | -0.14 | -0.09 | 17 | 4.48 | 1.82 | -0.11 | -0.07 | DProHA-DmaaNMe <sub>2</sub> | -0.115 | 3.93 | 1.82 | 4.48 | -0.12 | -0.08 | 18 | 4.27 | 1.47 | -0.29 | -0.18 | GlyHA2-DmaaBoc              | -0.305 | 3.58 | 1.47 | 4.28 | -0.32 | -0.21 |    |      |      |       |       |                             |        |      |      |      |       |       |    |      |      |       |       |                             |        |      |      |      |       |       |    |      |      |       |       |                             |        |      |      |      |       |       |    |      |      |       |       |                             |        |      |      |      |       |       |    |      |      |       |       |                             |        |      |      |      |       |       |    |      |      |       |       |                             |        |      |      |      |       |       |    |      |      |       |       |                             |        |      |      |      |       |       |    |      |      |       |       |                             |        |      |      |      |       |       |    |      |      |       |       |                             |        |      |      |      |       |       |    |      |      |       |       |                             |        |      |      |      |       |       |    |      |      |       |       |                             |        |      |      |      |       |       |    |      |      |       |       |                             |        |      |      |      |       |       |    |      |      |       |       |                             |        |      |      |      |       |       |    |      |      |       |       |                |        |      |
| 16 | 4.47 | 2.94 | -0.13      | -0.09    | DProHA-DProHD1              | -0.135                    | 3.21                             |    |      |      |       |       |                             |        |      |      |      |       |       |    |      |      |       |       |                             |        |      |      |      |       |       |    |      |      |       |       |                             |        |      |      |      |       |       |    |      |      |       |       |                             |        |      |      |      |       |       |    |      |      |       |       |                             |        |      |      |      |       |       |    |      |      |       |       |                             |        |      |      |      |       |       |    |      |      |       |       |                             |        |      |      |      |       |       |    |      |      |       |       |                             |        |      |      |      |       |       |    |      |      |       |       |                             |        |      |      |      |       |       |    |      |      |       |       |                             |        |      |      |      |       |       |    |      |      |       |       |                             |        |      |      |      |       |       |    |      |      |       |       |                             |        |      |      |      |       |       |    |      |      |       |       |                             |        |      |      |      |       |       |    |      |      |       |       |                             |        |      |      |      |       |       |    |      |      |       |       |                             |        |      |      |      |       |       |    |      |      |       |       |                             |        |      |      |      |       |       |    |      |      |       |       |                |        |      |
|    | 2.94 | 4.47 | -0.14      | -0.09    |                             |                           |                                  | 17 | 4.48 | 1.82 | -0.11 | -0.07 | DProHA-DmaaNMe <sub>2</sub> | -0.115 | 3.93 | 1.82 | 4.48 | -0.12 | -0.08 | 18 | 4.27 | 1.47 | -0.29 | -0.18 | GlyHA2-DmaaBoc              | -0.305 | 3.58 | 1.47 | 4.28 | -0.32 | -0.21 |    |      |      |       |       |                             |        |      |      |      |       |       |    |      |      |       |       |                             |        |      |      |      |       |       |    |      |      |       |       |                             |        |      |      |      |       |       |    |      |      |       |       |                             |        |      |      |      |       |       |    |      |      |       |       |                             |        |      |      |      |       |       |    |      |      |       |       |                             |        |      |      |      |       |       |    |      |      |       |       |                             |        |      |      |      |       |       |    |      |      |       |       |                             |        |      |      |      |       |       |    |      |      |       |       |                             |        |      |      |      |       |       |    |      |      |       |       |                             |        |      |      |      |       |       |    |      |      |       |       |                             |        |      |      |      |       |       |    |      |      |       |       |                             |        |      |      |      |       |       |    |      |      |       |       |                             |        |      |      |      |       |       |    |      |      |       |       |                             |        |      |      |      |       |       |    |      |      |       |       |                |        |      |
| 17 | 4.48 | 1.82 | -0.11      | -0.07    | DProHA-DmaaNMe <sub>2</sub> | -0.115                    | 3.93                             |    |      |      |       |       |                             |        |      |      |      |       |       |    |      |      |       |       |                             |        |      |      |      |       |       |    |      |      |       |       |                             |        |      |      |      |       |       |    |      |      |       |       |                             |        |      |      |      |       |       |    |      |      |       |       |                             |        |      |      |      |       |       |    |      |      |       |       |                             |        |      |      |      |       |       |    |      |      |       |       |                             |        |      |      |      |       |       |    |      |      |       |       |                             |        |      |      |      |       |       |    |      |      |       |       |                             |        |      |      |      |       |       |    |      |      |       |       |                             |        |      |      |      |       |       |    |      |      |       |       |                             |        |      |      |      |       |       |    |      |      |       |       |                             |        |      |      |      |       |       |    |      |      |       |       |                             |        |      |      |      |       |       |    |      |      |       |       |                             |        |      |      |      |       |       |    |      |      |       |       |                             |        |      |      |      |       |       |    |      |      |       |       |                             |        |      |      |      |       |       |    |      |      |       |       |                |        |      |
|    | 1.82 | 4.48 | -0.12      | -0.08    |                             |                           |                                  | 18 | 4.27 | 1.47 | -0.29 | -0.18 | GlyHA2-DmaaBoc              | -0.305 | 3.58 | 1.47 | 4.28 | -0.32 | -0.21 |    |      |      |       |       |                             |        |      |      |      |       |       |    |      |      |       |       |                             |        |      |      |      |       |       |    |      |      |       |       |                             |        |      |      |      |       |       |    |      |      |       |       |                             |        |      |      |      |       |       |    |      |      |       |       |                             |        |      |      |      |       |       |    |      |      |       |       |                             |        |      |      |      |       |       |    |      |      |       |       |                             |        |      |      |      |       |       |    |      |      |       |       |                             |        |      |      |      |       |       |    |      |      |       |       |                             |        |      |      |      |       |       |    |      |      |       |       |                             |        |      |      |      |       |       |    |      |      |       |       |                             |        |      |      |      |       |       |    |      |      |       |       |                             |        |      |      |      |       |       |    |      |      |       |       |                             |        |      |      |      |       |       |    |      |      |       |       |                             |        |      |      |      |       |       |    |      |      |       |       |                             |        |      |      |      |       |       |    |      |      |       |       |                |        |      |
| 18 | 4.27 | 1.47 | -0.29      | -0.18    | GlyHA2-DmaaBoc              | -0.305                    | 3.58                             |    |      |      |       |       |                             |        |      |      |      |       |       |    |      |      |       |       |                             |        |      |      |      |       |       |    |      |      |       |       |                             |        |      |      |      |       |       |    |      |      |       |       |                             |        |      |      |      |       |       |    |      |      |       |       |                             |        |      |      |      |       |       |    |      |      |       |       |                             |        |      |      |      |       |       |    |      |      |       |       |                             |        |      |      |      |       |       |    |      |      |       |       |                             |        |      |      |      |       |       |    |      |      |       |       |                             |        |      |      |      |       |       |    |      |      |       |       |                             |        |      |      |      |       |       |    |      |      |       |       |                             |        |      |      |      |       |       |    |      |      |       |       |                             |        |      |      |      |       |       |    |      |      |       |       |                             |        |      |      |      |       |       |    |      |      |       |       |                             |        |      |      |      |       |       |    |      |      |       |       |                             |        |      |      |      |       |       |    |      |      |       |       |                             |        |      |      |      |       |       |    |      |      |       |       |                |        |      |
|    | 1.47 | 4.28 | -0.32      | -0.21    |                             |                           |                                  |    |      |      |       |       |                             |        |      |      |      |       |       |    |      |      |       |       |                             |        |      |      |      |       |       |    |      |      |       |       |                             |        |      |      |      |       |       |    |      |      |       |       |                             |        |      |      |      |       |       |    |      |      |       |       |                             |        |      |      |      |       |       |    |      |      |       |       |                             |        |      |      |      |       |       |    |      |      |       |       |                             |        |      |      |      |       |       |    |      |      |       |       |                             |        |      |      |      |       |       |    |      |      |       |       |                             |        |      |      |      |       |       |    |      |      |       |       |                             |        |      |      |      |       |       |    |      |      |       |       |                             |        |      |      |      |       |       |    |      |      |       |       |                             |        |      |      |      |       |       |    |      |      |       |       |                             |        |      |      |      |       |       |    |      |      |       |       |                             |        |      |      |      |       |       |    |      |      |       |       |                             |        |      |      |      |       |       |    |      |      |       |       |                             |        |      |      |      |       |       |    |      |      |       |       |                |        |      |

|    |      |      |       |       |                              |        |      |
|----|------|------|-------|-------|------------------------------|--------|------|
| 19 | 4.1  | 3.6  | -3.04 | -1.95 | DmaaHA-DProHD2               | -3.065 | 1.91 |
|    | 3.6  | 4.11 | -3.09 | -1.98 |                              |        |      |
| 20 | 4.1  | 2.93 | -2.41 | -1.55 | DmaaHA-DProHD1               | -2.43  | 1.99 |
|    | 2.93 | 4.11 | -2.45 | -1.57 |                              |        |      |
| 21 | 4.09 | 1.82 | -2.03 | -1.3  | DmaaHA-DmaaNMe <sub>2</sub>  | -2.03  | 2.44 |
|    | 1.82 | 4.09 | -2.03 | -1.3  |                              |        |      |
| 22 | 4.11 | 1.47 | -0.21 | -0.14 | DmaaHA-DmaaBoc               | -0.21  | 3.81 |
|    | 1.47 | 4.11 | -0.21 | -0.14 |                              |        |      |
| 23 | 3.89 | 1.47 | -0.25 | -0.16 | GlyHA1-DmaaBoc               | -0.255 | 2.90 |
|    | 1.47 | 3.89 | -0.26 | -0.17 |                              |        |      |
| 24 | 3.61 | 1.9  | -0.17 | -0.11 | DProHD2-DProHB2              | -0.17  | 3.09 |
|    | 1.9  | 3.61 | -0.17 | -0.11 |                              |        |      |
| 25 | 2.93 | 2.07 | -0.31 | -0.2  | DProHD1-DmaaHB1              | -0.32  | 2.80 |
|    | 2.06 | 2.93 | -0.33 | -0.21 |                              |        |      |
| 26 | 2.93 | 1.82 | -0.3  | -0.19 | DProHD1-DmaaNMe <sub>2</sub> | -0.3   | 3.35 |
|    | 1.82 | 2.93 | -0.3  | -0.19 |                              |        |      |
| 27 | 2.93 | 1.62 | -0.38 | -0.24 | DProHD1-DProHB1              | -0.37  | 2.71 |
|    | 1.62 | 2.93 | -0.36 | -0.23 |                              |        |      |
| 28 | 2.43 | 1.82 | -1.21 | -0.78 | DmaaHB2-DmaaNMe <sub>2</sub> | -1.22  | 2.65 |
|    | 1.82 | 2.43 | -1.23 | -0.79 |                              |        |      |
| 29 | 1.47 | 1.09 | -1.67 | -1.07 | DmaaBoc-AcpcHB1a             | -1.685 | 2.69 |
|    | 1.09 | 1.47 | -1.7  | -1.09 |                              |        |      |
| 31 | 2.93 | 1.82 | -0.3  | -0.19 | DProHD1-DProHD2              | -4.32  | 2.21 |
|    | 3.6  | 2.93 | -8.34 | -5.36 |                              |        |      |

# Peptide 15

$^1\text{H-NMR}$  (600 MHz, 0.01 M in  $\text{C}_6\text{D}_6$ , 20 °C)

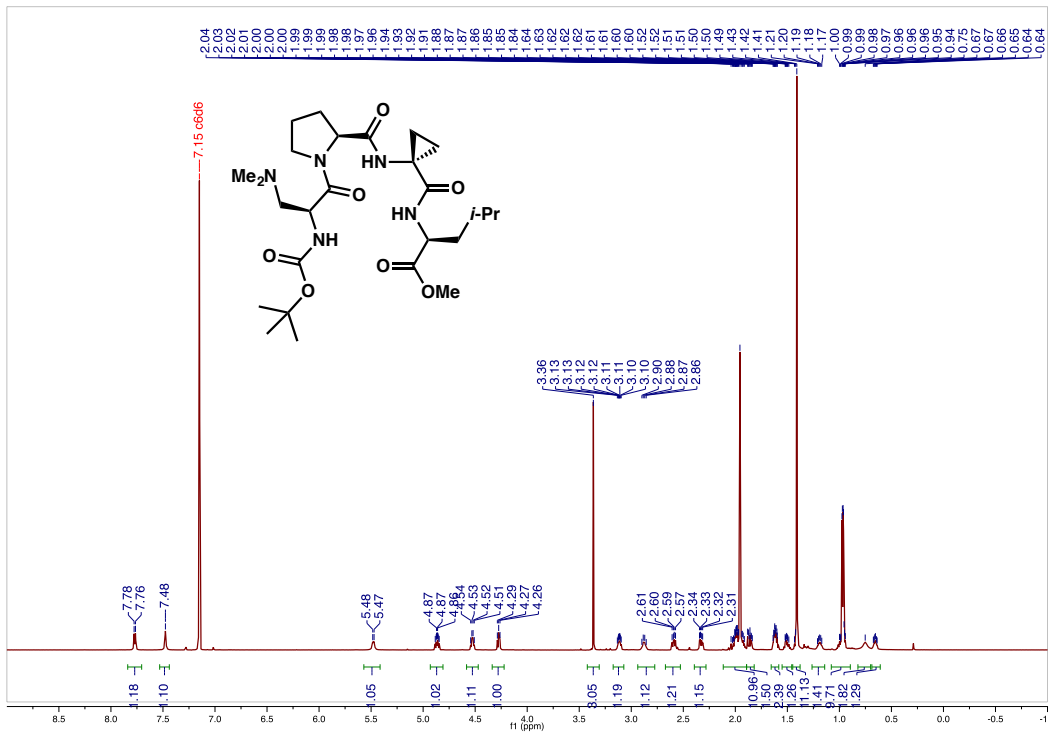

COSY (600 MHz, 0.01 M in  $\text{C}_6\text{D}_6$ , 20 °C)

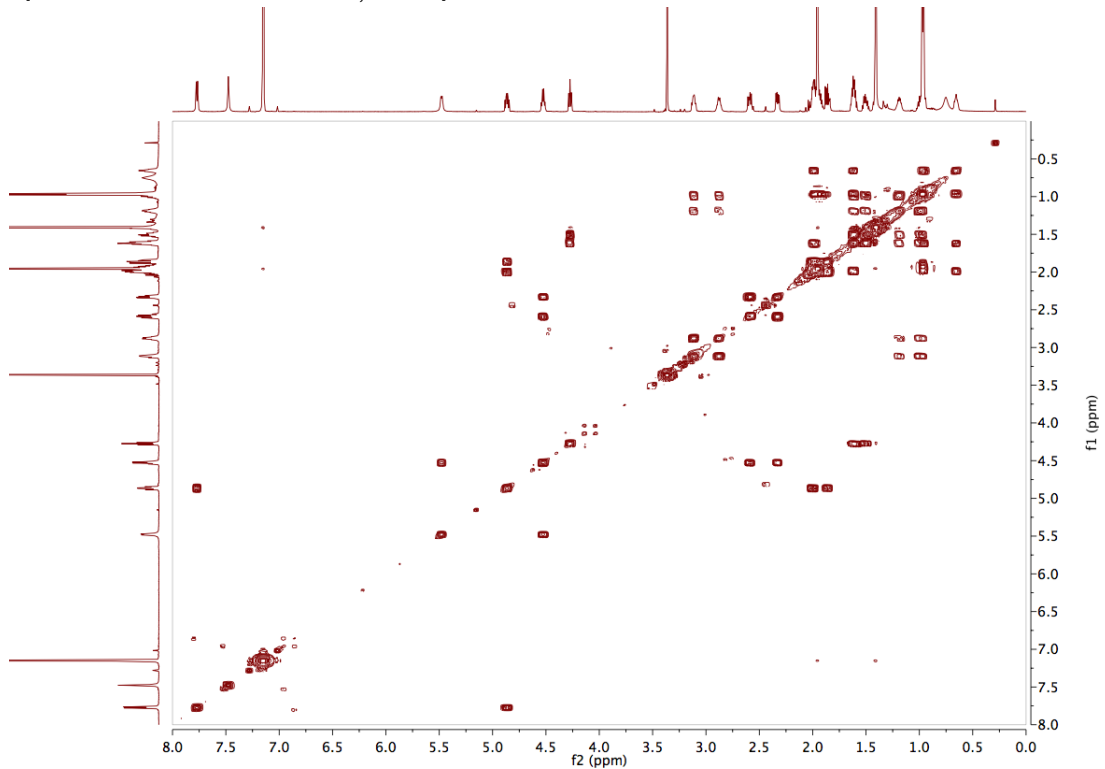



**Table 5.07: Peak Assignments for Peptide 15**

| Assignment (splitting)       | Shift (ppm) | Range (ppm) | H's | J's (Hz)         |
|------------------------------|-------------|-------------|-----|------------------|
| LeuOMe (s)                   | 3.36        | 3.38–3.35   | 3   |                  |
| LeuNH (d)                    | 7.77        | 7.79–7.75   | 1   | 7.87             |
| LeuHB2, AcpcHB2b (m)         | 2.01        | 2.05–1.97   | 2   |                  |
| LeuHB1 (m)                   | 1.86        | 1.90–1.82   | 1   |                  |
| LeuHA (ddd)                  | 4.86        | 4.90–4.83   | 1   | 5.45, 7.84, 9.35 |
| DProHG2 (m)                  | 1.18        | 1.23–1.14   | 1   |                  |
| DProHD2 (m)                  | 3.12        | 3.15–3.08   | 1   |                  |
| DProHD1 (q)                  | 2.88        | 2.91–2.84   | 1   | 7.44             |
| DProHB2, AcpcHB2a (m)        | 1.61        | 1.65–1.57   | 2   |                  |
| DProHB1 (m)                  | 1.51        | 1.55–1.46   | 1   |                  |
| DProHA (t)                   | 4.27        | 4.30–4.24   | 1   | 7.56, 7.56       |
| DmaaNH (d)                   | 5.48        | 5.50–5.45   | 1   | 7.56             |
| DmaaNMe <sub>2</sub> (s)     | 1.96        | 1.97–1.91   | 6   |                  |
| DmaaHB2 (dd)                 | 2.59        | 2.62–2.54   | 1   | 7.42, 12.33      |
| DmaaHB1 (dd)                 | 2.33        | 2.36–2.30   | 1   | 5.78, 12.32      |
| DmaaHA (q)                   | 4.53        | 4.56–4.49   | 1   | 7.21             |
| DmaaBoc (s)                  | 1.41        | 1.43–1.39   | 9   |                  |
| AcpcNH (s)                   | 7.48        | 7.49–7.46   | 1   |                  |
| AcpcHB1b, LeuHD, DProHG1 (m) | 0.97        | 1.04–0.93   | 8   |                  |
| AcpcHB1a (m)                 | 0.66        | 0.69–0.62   | 1   |                  |

NOESY (600 MHz, 0.01 M in C<sub>6</sub>D<sub>6</sub>, 20 °C)

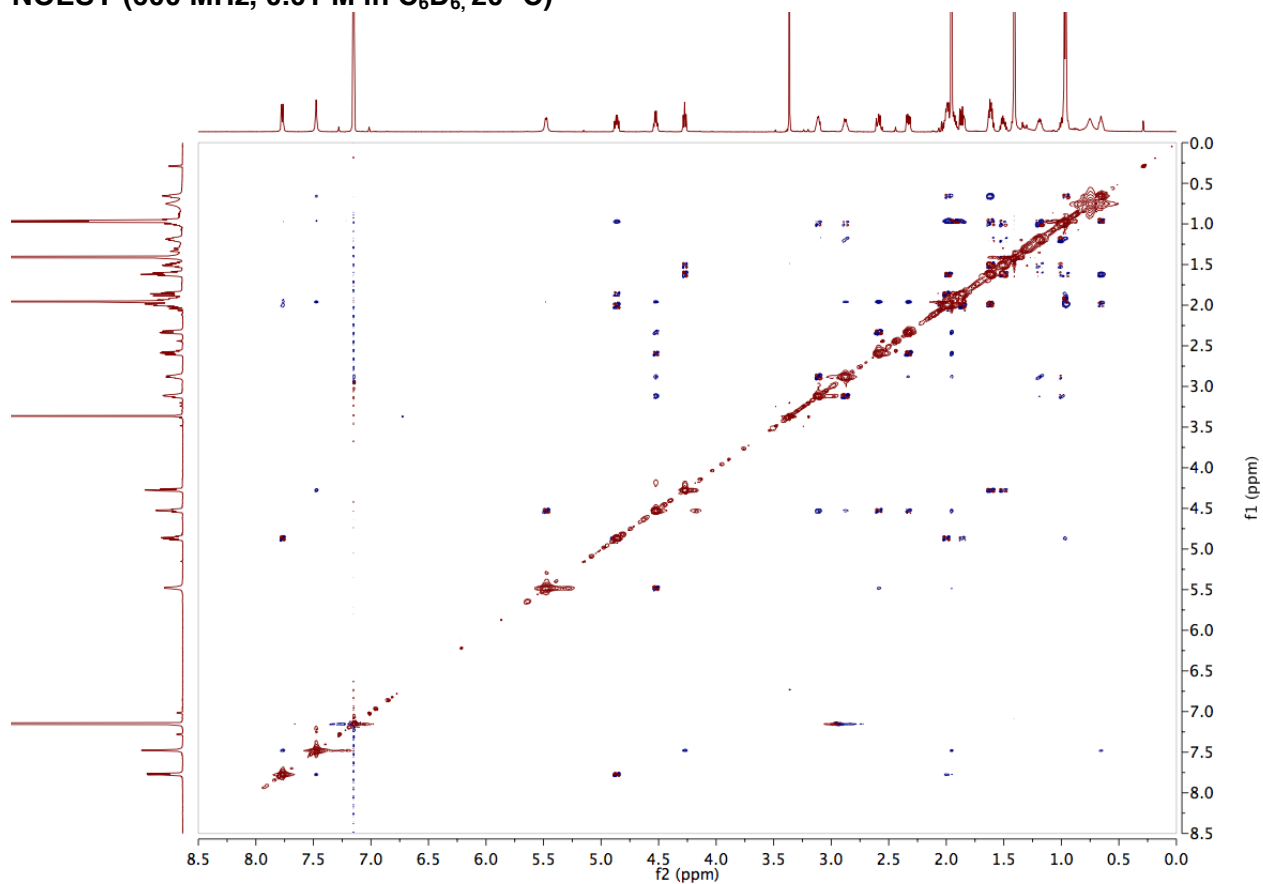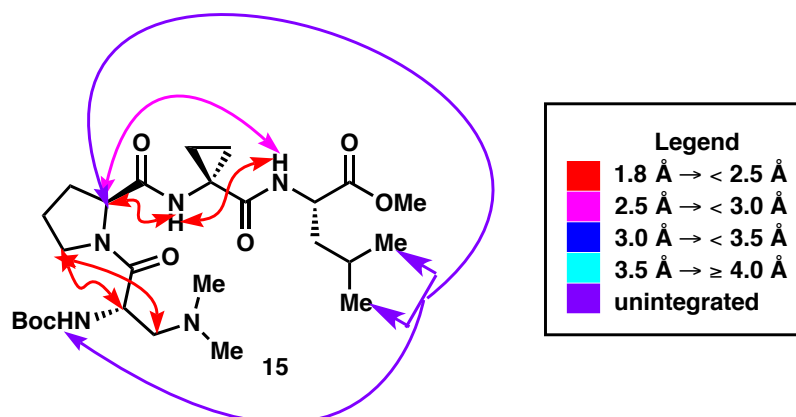

Figure S5.04: Inter-residue nOe Map for Peptide 15

**Table S5.08: Integrated NOESY Cross-peaks for Peptide 15**

|    | f2   | f1   | Normalized | Absolute | Assignment      | Corrected Distances<br>(Normalized) |
|----|------|------|------------|----------|-----------------|-------------------------------------|
| 1  | 7.77 | 1.86 | -0.28      | -202.4   | LeuNH-LeuHB1    | 2.75                                |
|    | 1.85 | 7.77 | -0.25      | -177.35  |                 |                                     |
| 2  | 7.76 | 7.47 | -1         | -715.71  | LeuNH-AcpcNH    | 2.16                                |
|    | 7.47 | 7.77 | -0.85      | -605.17  |                 |                                     |
| 3  | 7.75 | 4.27 | -0.17      | -124.61  | LeuNH-DProHA    | 2.93                                |
|    | 4.26 | 7.77 | -0.21      | -151.7   |                 |                                     |
| 4  | 7.47 | 0.65 | -0.57      | -405.17  | AcpcNH-AcpcHB1a | 2.31                                |
|    | 0.65 | 7.48 | -0.65      | -468.61  |                 |                                     |
| 5  | 7.46 | 4.28 | -0.94      | -674.7   | AcpcNH-DProHA   | 2.09                                |
|    | 4.27 | 7.47 | -1.25      | -896.5   |                 |                                     |
| 6  | 5.46 | 2.32 | -0.22      | -155.92  | DmaaNH-DmaaHB1  | 2.66                                |
|    | 2.32 | 5.47 | -0.39      | -276.2   |                 |                                     |
| 7  | 5.46 | 2.58 | -0.58      | -411.74  | DmaaNH-DmaaHB2  | 2.29                                |
|    | 2.58 | 5.48 | -0.88      | -632.26  |                 |                                     |
| 8  | 4.52 | 2.87 | -1.42      | -1017.38 | DmaaHA-DProHD1  | 2.09                                |
|    | 2.86 | 4.53 | -1.32      | -943.21  |                 |                                     |
| 9  | 4.51 | 3.1  | -3.75      | -2681.45 | DmaaHA-DProHD2  | 1.79                                |
|    | 3.1  | 4.49 | -3.28      | -2347.96 |                 |                                     |
| 10 | 2.87 | 2.33 | -0.81      | -578.27  | DProHD1-DmaaHB1 | 2.25                                |
|    | 2.31 | 2.89 | -0.88      | -631.7   |                 |                                     |
| 11 | 2.87 | 3.12 | -3.21      | -2297.54 | DProHD1-DProHD2 | 1.80                                |
|    | 3.11 | 2.87 | -2.92      | -2088.06 |                 |                                     |

**Table S5.09: Unintegrated NOESY Cross-peaks for Peptide 15**

LeuNH-LeuHD  
 DmaaNH-LeuHD  
 DmaaNH-DmaaBoc  
 ProHA-LeuHD  
 ProHD-ProHB

# Peptide 16

$^1\text{H-NMR}$  (600 MHz, 0.01 M in  $\text{C}_6\text{D}_6$ , 20 °C)

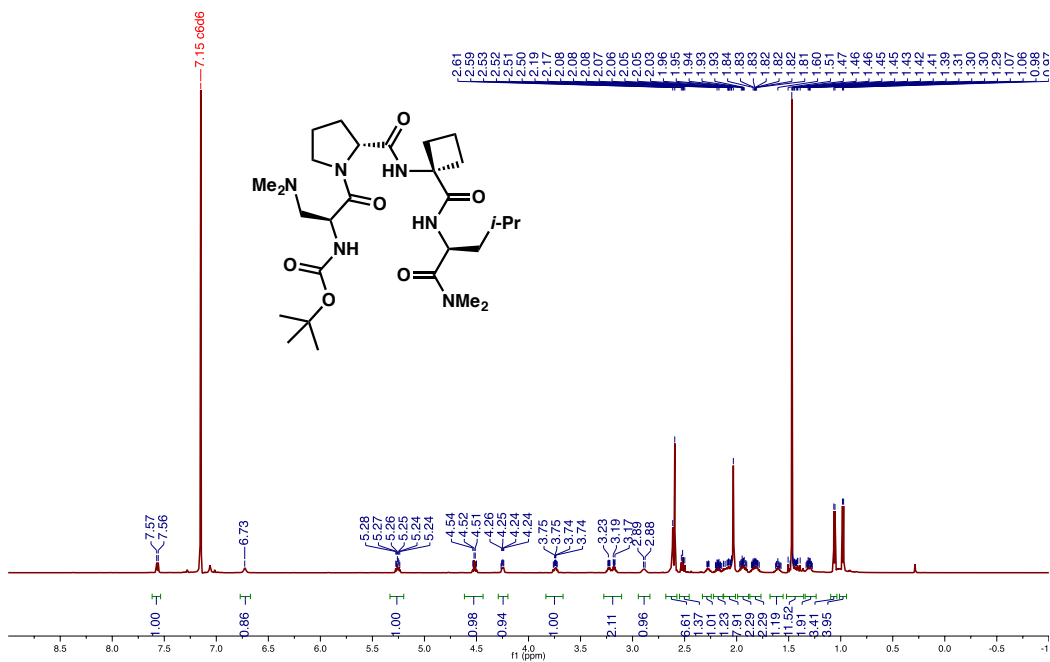

COSY (600 MHz, 0.01 M in  $\text{C}_6\text{D}_6$ , 20 °C)

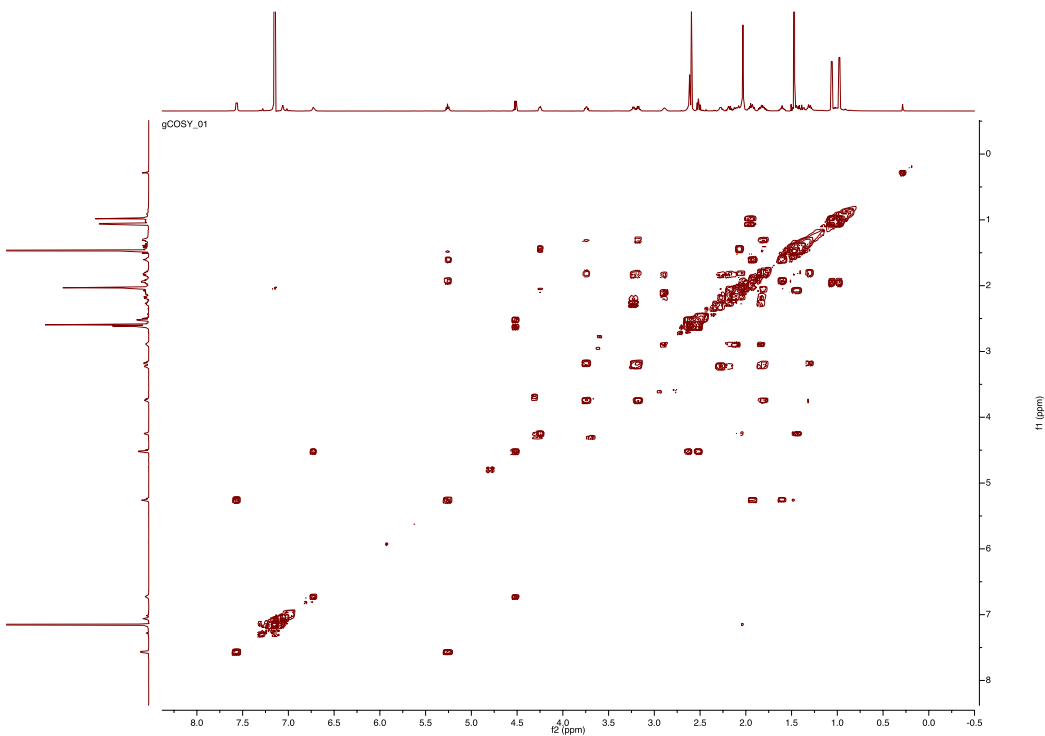

**Table 5.10: Peak Assignments for Peptide 16**

| Assignment (splitting)            | Shift (ppm) | Range (ppm) | H's | J's (Hz)  |
|-----------------------------------|-------------|-------------|-----|-----------|
| LeuNH (d)                         | 7.57        | 7.59–7.54   | 1   | 8.9       |
| LeuHD2 (d)                        | 1.06        | 1.09–1.02   | 3   | 6.4       |
| LeuHD1 (d)                        | 0.98        | 1.05–0.96   | 3   | 6.5       |
| LeuHB2, LeuHG (m)                 | 1.94        | 2.01–1.89   | 2   |           |
| LeuHB1 (m)                        | 1.6         | 1.66–1.55   | 1   |           |
| LeuHA (dd)                        | 5.26        | 5.29–5.22   | 1   | 9.0, 4.9  |
| DProHG1 (m)                       | 1.3         | 1.35–1.26   | 1   |           |
| DProHD2 (m)                       | 3.74        | 3.78–3.71   | 1   |           |
| DProHD1 (d)                       | 3.18        | 3.20–3.14   | 1   | 7.5       |
| DProHB2, DmaaNMe <sub>2</sub> (s) | 2.03        | 2.07–2.02   | 7   |           |
| DProHA (dd)                       | 4.25        | 4.27–4.22   | 1   | 3.8, 8.3  |
| DmaaNH (s)                        | 6.73        | 6.74–6.71   | 1   |           |
| DmaaHB2, LeuNMe (m)               | 2.6         | 2.67–2.56   | 7   |           |
| DmaaHB1 (dd)                      | 2.51        | 2.56–2.45   | 1   | 7.4, 12.4 |
| DmaaHA (d)                        | 4.52        | 4.55–4.48   | 1   | 7.1       |
| DmaaBoc (s)                       | 1.47        | 1.49–1.46   | 9   |           |
| AcbcNH (s)                        | 7.06        | 7.08–7.04   | 1   |           |
| AcbcHG2 (m)                       | 2.11        | 2.16–2.08   | 1   |           |
| AcbcHG1, DProHG2 (m)              | 1.82        | 1.88–1.75   | 2   |           |
| AcbcHB2b (m)                      | 2.28        | 2.32–2.24   | 1   |           |
| AcbcHB2a (m)                      | 2.18        | 2.23–2.15   | 1   |           |
| AcbcHB1b (m)                      | 2.89        | 2.91–2.86   | 1   |           |
| AcbcHB1a (s)                      | 3.23        | 3.27–3.20   | 1   |           |

NOESY (600 MHz, 0.01 M in C<sub>6</sub>D<sub>6</sub>, 20 °C)

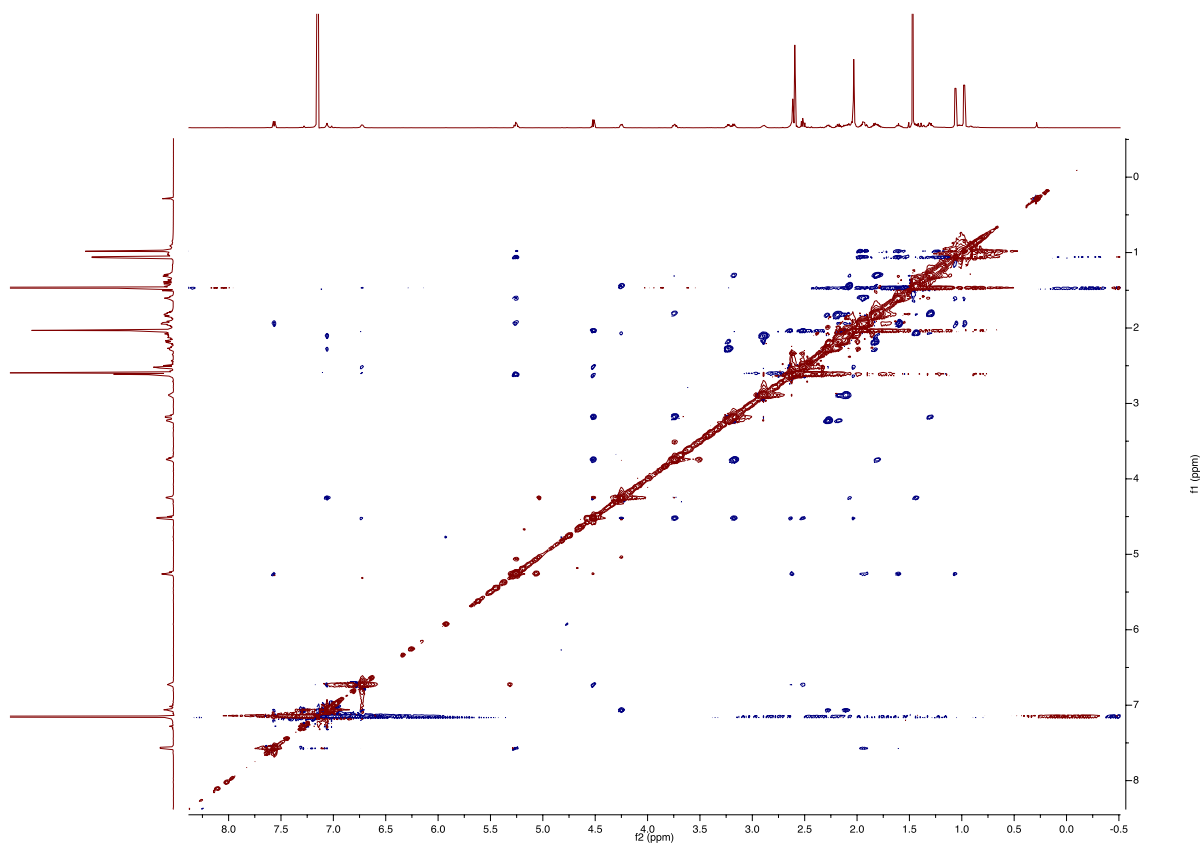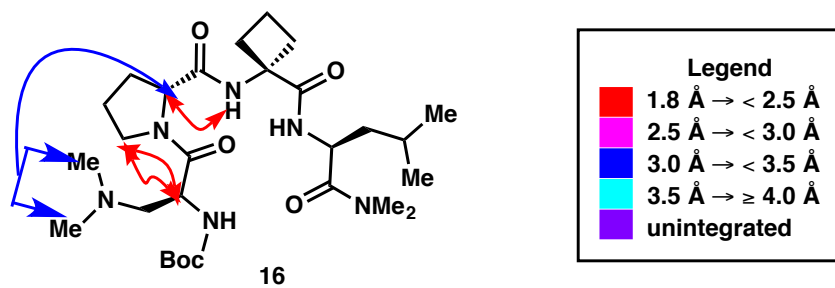

Figure S5.05: Inter-residue nOe Map for Peptide 16

**Table S5.11: Integrated NOESY Cross-peaks for Peptide 16**

|    | f2   | f1   | Normalized | Absolute | Assignment                  | Corrected Distances (Normalized) |
|----|------|------|------------|----------|-----------------------------|----------------------------------|
| 1  | 7.57 | 1.61 | 0.26       | 247.93   | LeuNH-LeuHB1                | 3.11                             |
|    | 1.62 | 7.55 | 0.25       | 239.25   |                             |                                  |
| 2  | 7.56 | 1.93 | 1          | 962.38   | LeuNH-LeuHB2                | 2.65                             |
|    | 1.94 | 7.55 | 1          | 960.42   |                             |                                  |
| 3  | 7.07 | 4.23 | 1.13       | 1083.77  | AcbcNH-DProHA               | 2.34                             |
|    | 4.24 | 7.06 | 1.51       | 1456.87  |                             |                                  |
| 4  | 7.06 | 2.09 | 0.83       | 795.97   | AcbcNH-AcbcHG2              | 2.53                             |
|    | 2.1  | 7.06 | 1.18       | 1136.06  |                             |                                  |
| 5  | 7.05 | 2.28 | 0.46       | 440.42   | AcbcNH-AcbcHB2b             | 2.69                             |
|    | 2.27 | 7.06 | 0.62       | 593.99   |                             |                                  |
| 6  | 6.72 | 2.61 | 0.41       | 398.9    | DmaaNH-DmaaHB2              | 3.36                             |
|    | 2.64 | 6.71 | 0.24       | 235.5    |                             |                                  |
| 7  | 6.71 | 2.49 | 0.54       | 514.93   | DmaaNH-DmaaHB1              | 2.81                             |
|    | 2.52 | 6.74 | 0.43       | 412.88   |                             |                                  |
| 8  | 5.26 | 1.93 | 0.81       | 778.96   | LeuHA-LeuHG                 | 2.80                             |
|    | 1.92 | 5.24 | 0.81       | 782.08   |                             |                                  |
| 9  | 5.25 | 1.05 | 1.23       | 1185.66  | LeuHA-LeuNMe2               | 2.62                             |
|    | 1.06 | 5.25 | 0.37       | 354.23   |                             |                                  |
| 10 | 5.25 | 2.61 | 1.97       | 1892.08  | LeuHA-LeuNMe1               | 2.64                             |
|    | 2.62 | 5.27 | 0.96       | 927      |                             |                                  |
| 11 | 5.25 | 0.96 | 0.31       | 295.97   | LeuHA-LeuHMe1               | 3.29                             |
|    | 0.99 | 5.25 | 0.11       | 104.47   |                             |                                  |
| 12 | 4.52 | 3.74 | 1.92       | 1843.36  | DmaaHA-DProHD2              | 2.28                             |
|    | 3.75 | 4.51 | 2.23       | 2144.73  |                             |                                  |
| 13 | 4.5  | 3.17 | 1.83       | 1765.22  | DmaaHA-DProHD1              | 2.31                             |
|    | 3.18 | 4.51 | 1.83       | 1757.54  |                             |                                  |
| 14 | 4.25 | 2.04 | 0.49       | 470.01   | DProHA-DmaaNMe <sub>2</sub> | 3.15                             |
|    | 2.07 | 4.25 | 0.37       | 353.02   |                             |                                  |
| 15 | 3.76 | 3.16 | 8.98       | 8642.74  | DProHD2-DProHD1             | 1.80                             |
|    | 3.16 | 3.75 | 7.6        | 7315.56  |                             |                                  |

**Table S5.12: Unintegrated NOESY Cross-peaks for Peptide 16**

DmaaNH-DmaaNMe<sub>2</sub>  
 DmaaHB1-DmaaNMe<sub>2</sub>  
 DmaaHB2-DmaaNMe<sub>2</sub>  
 LeuHB1-LeuHD1  
 LeuHB1-LeuHD2





**Table S5.13: Peak Assignments for Peptide 17**

| Assignment (splitting)            | Shift (ppm) | Range (ppm) | H's | J's (Hz)          |
|-----------------------------------|-------------|-------------|-----|-------------------|
| LeuOMe (s)                        | 3.34        | 3.35–3.32   | 3   |                   |
| LeuNH (d)                         | 7.49        | 7.51–7.47   | 1   | 7.79              |
| LeuHD (dd)                        | 0.99        | 1.02–0.94   | 6   | 2.70, 6.53        |
| LeuHG (m)                         | 1.77        | 1.81–1.73   | 1   |                   |
| LeuHB2, DmaaHB1 (m)               | 2           | 2.04–1.96   | 2   |                   |
| LeuHA (ddd)                       | 5.05        | 5.09–5.01   | 1   | 4.76, 7.76, 9.92  |
| DProHG2 (m)                       | 1.65        | 1.71–1.61   | 1   |                   |
| DProHG1 (m)                       | 1.25        | 1.30–1.21   | 1   |                   |
| DProHD2 (m)                       | 3.55        | 3.59–3.52   | 1   |                   |
| DProHD1 (q)                       | 2.89        | 2.93–2.86   | 1   | 8.39              |
| DProHB2 (m)                       | 2.07        | 2.12–2.04   | 1   |                   |
| DProHB1 (m)                       | 1.58        | 1.61–1.53   | 1   |                   |
| DProHA (dd)                       | 4.44        | 4.46–4.41   | 1   | 3.31, 8.47        |
| DmaaNH (s)                        | 5.75        | 5.77–5.73   | 1   |                   |
| DmaaNMe <sub>2</sub> , LeuHB1 (s) | 1.8         | 1.82–1.78   | 7   |                   |
| DmaaHB2, AcbcHB1a (m)             | 2.41        | 2.44–2.36   | 2   |                   |
| DmaaHA (dt)                       | 4.11        | 4.15–4.08   | 1   | 4.54, 9.41        |
| DmaaBoc (s)                       | 1.45        | 1.47–1.44   | 9   |                   |
| AcbcNH (s)                        | 7.58        | 7.59–7.56   | 1   |                   |
| AcbcHG2 (dtt)                     | 2.22        | 2.28–2.17   | 1   | 6.99, 9.32, 10.93 |
| AcbcHG1 (m)                       | 1.91        | 1.95–1.86   | 1   |                   |
| AcbcHB2b (m)                      | 3.41        | 3.46–3.37   | 1   |                   |
| AcbcHB2a (m)                      | 3.02        | 3.06–2.97   | 1   |                   |
| AcbcHB1b (m)                      | 2.47        | 2.51–2.44   | 1   |                   |

NOESY (600 MHz, 0.01 M in C<sub>6</sub>D<sub>6</sub>, 20 °C)

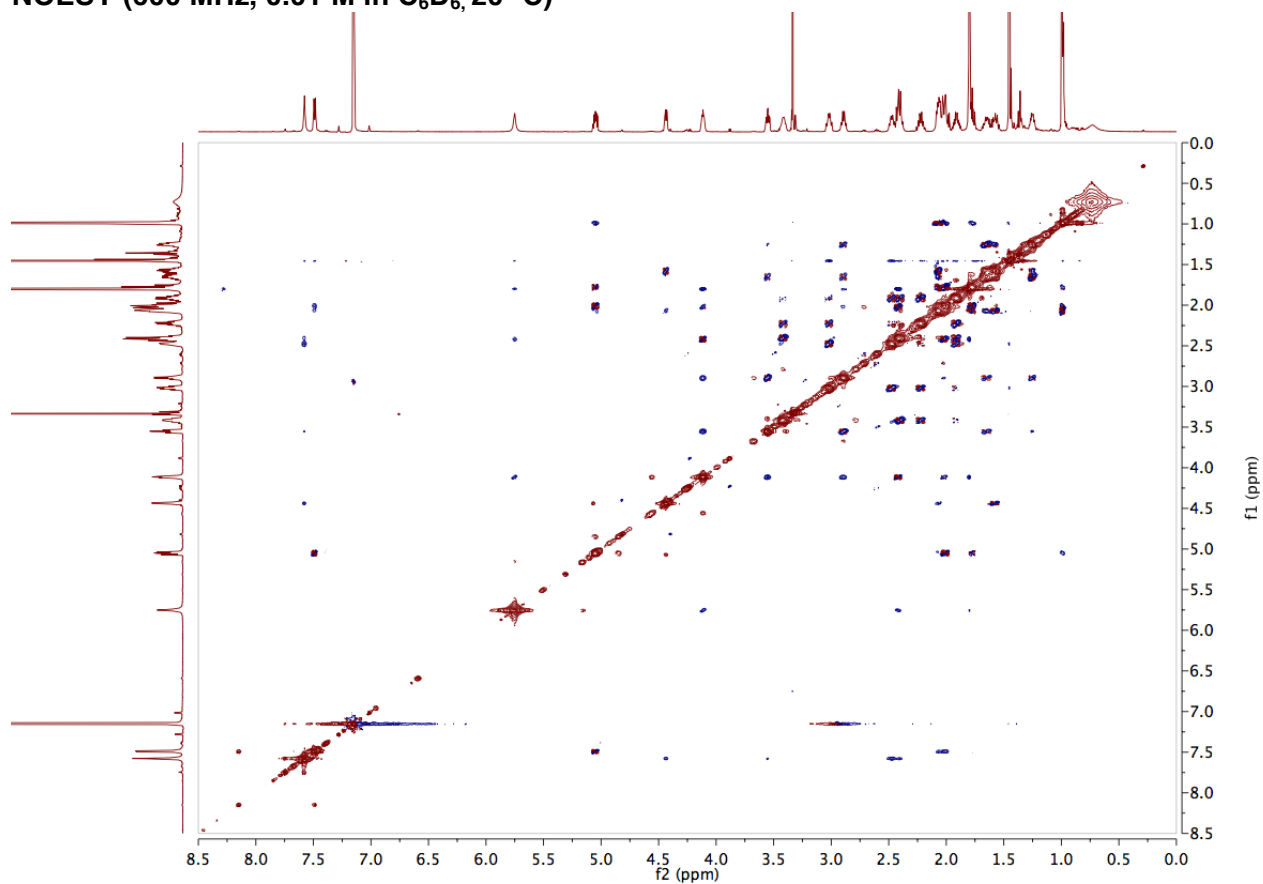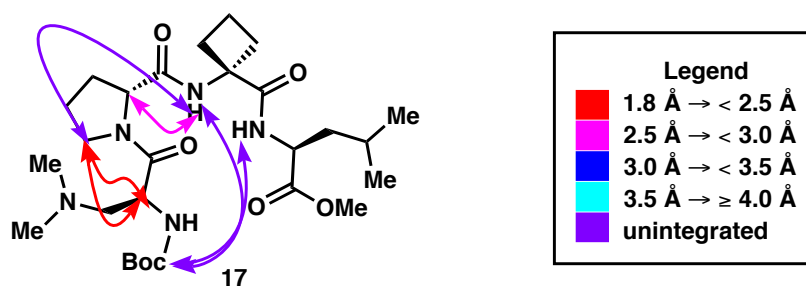

Figure S5.06: Inter-residue nOe Map for Peptide 17

**Table S5.14: Integrated NOESY Cross-peaks for Peptide 17**

|    | f2   | f1   | Normalized | Absolute | Assignment                  | Corrected Distances (Absolute) |
|----|------|------|------------|----------|-----------------------------|--------------------------------|
| 1  | 7.58 | 2.48 | -0.02      | -1233.27 | AcbcNH-AcbcHB1b             | 2.39                           |
|    | 2.48 | 7.57 | -0.02      | -1528.62 |                             |                                |
| 2  | 7.58 | 2.4  | -0.01      | -422.27  | AcbcNH-AcbcHG1              | 3.08                           |
|    | 2.39 | 7.58 | -0.01      | -432.76  |                             |                                |
| 3  | 7.58 | 4.43 | -0.01      | -521.39  | AcbcNH-DProHA               | 2.76                           |
|    | 4.43 | 7.58 | -0.01      | -582.74  |                             |                                |
| 4  | 7.48 | 2.06 | -0.01      | -543.17  | LeuNH-LeuHB2                | 3.01                           |
|    | 2.08 | 7.49 | -0.01      | -435.53  |                             |                                |
| 5  | 7.48 | 1.99 | -0.01      | -617.03  | LeuNH-LeuHD                 | 2.75                           |
|    | 2    | 7.49 | -0.02      | -1079.18 |                             |                                |
| 6  | 5.75 | 1.79 | 0          | -298.27  | DmaaNH-DmaaNMe <sub>2</sub> | 2.96                           |
|    | 1.79 | 5.75 | 0          | -207.84  |                             |                                |
| 7  | 5.74 | 2.41 | -0.01      | -681.6   | DmaaNH-DmaaHB2              | 2.87                           |
|    | 2.41 | 5.75 | -0.01      | -737.49  |                             |                                |
| 8  | 5.05 | 0.98 | -0.03      | -1696.58 | LeuHA-LeuHD                 | 2.75                           |
|    | 0.98 | 5.04 | -0.01      | -748.87  |                             |                                |
| 9  | 4.11 | 2.02 | -0.01      | -876.01  | DmaaHA-DmaaHB1              | 2.84                           |
|    | 2.01 | 4.1  | -0.01      | -723.58  |                             |                                |
| 10 | 4.1  | 3.55 | -0.04      | -2620.33 | DmaaHA-DProHD2              | 2.20                           |
|    | 3.55 | 4.11 | -0.04      | -2521.79 |                             |                                |
| 11 | 4.12 | 2.9  | -0.03      | -1969.11 | DmaaHA-DProHD1              | 2.31                           |
|    | 2.89 | 4.12 | -0.03      | -1872.56 |                             |                                |
| 12 | 3.55 | 2.91 | -0.12      | -7821.48 | DProHD1-DProHD2             | 1.80                           |
|    | 2.89 | 3.55 | -0.12      | -7844.24 |                             |                                |

**Table S5.15: Unintegrated NOESY Cross-peaks for Peptide 17**

AcbcNH-DProHD  
 AcbcNH-DmaaBoc  
 LeuNH-DmaaBoc  
 DmaaNH-DmaaHB  
 DmaaNH-DmaaNMe<sub>2</sub>  
 LeuHA-LeuHD  
 DmaaHA-DmaaNMe<sub>2</sub>  
 DmaaHA-DmaaBoc

# Peptide 18

$^1\text{H-NMR}$  (600 MHz, 0.01 M in  $\text{C}_6\text{D}_6$ , 20 °C)

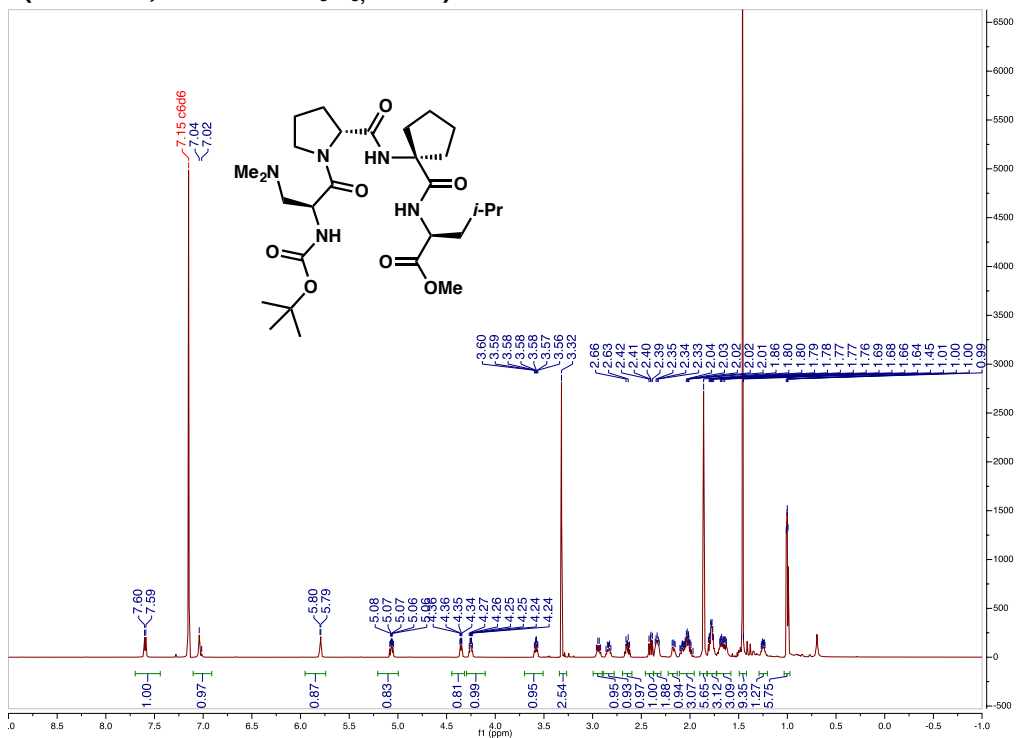

COSY (600 MHz, 0.01 M in  $\text{C}_6\text{D}_6$ , 20 °C)

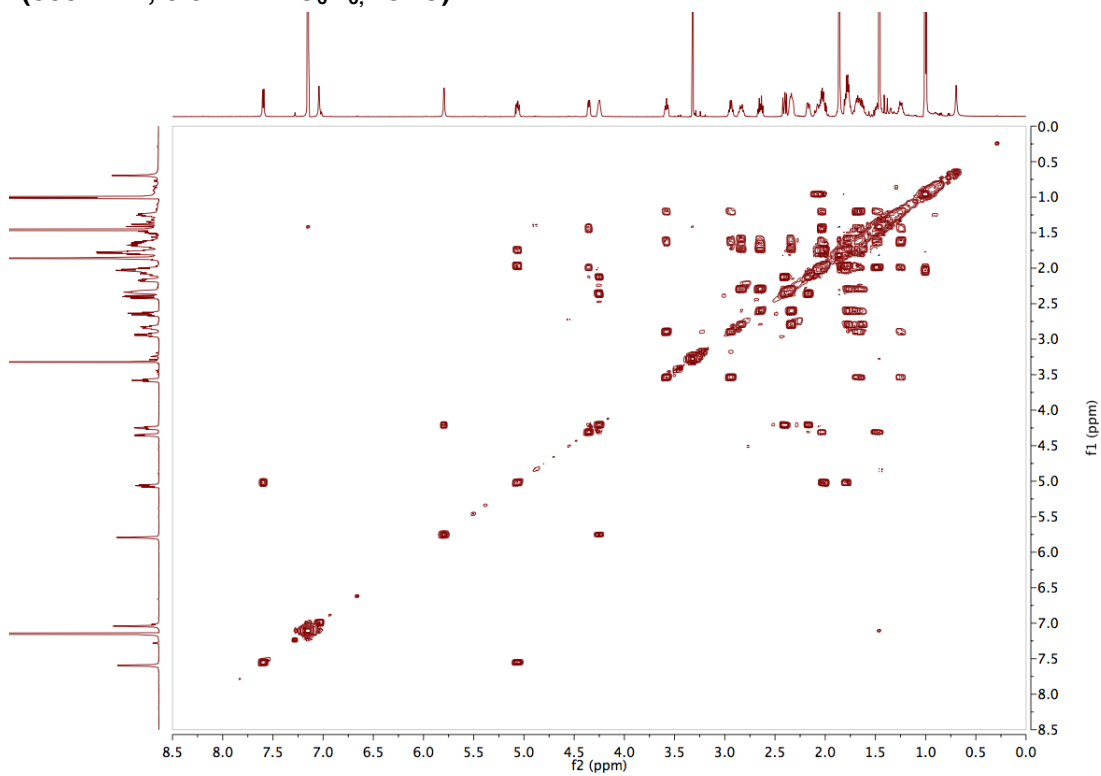

**Table S5.16: Peak Assignments for Peptide 18**

| Assignment (splitting)     | Shift (ppm) | Range (ppm) | H's | J's (Hz)         |
|----------------------------|-------------|-------------|-----|------------------|
| DmaaBoc (s)                | 1.46        | 1.48–1.44   | 9   |                  |
| LeuOMe (s)                 | 3.32        | 3.34–3.30   | 3   |                  |
| LeuNH (d)                  | 7.6         | 7.62–7.57   | 1   | 7.99             |
| LeuHD (dd)                 | 1           | 1.03–0.98   | 6   | 4.61, 6.55       |
| LeuHB1, LeuHG, CleHG2b (m) | 1.78        | 1.83–1.74   | 3   |                  |
| LeuHA (ddd)                | 5.06        | 5.10–5.03   | 1   | 4.80, 7.98, 9.99 |
| DProHG1 (m)                | 1.25        | 1.28–1.21   | 1   |                  |
| DProHD2 (m)                | 3.58        | 3.61–3.55   | 1   |                  |
| DProHD1 (q)                | 2.94        | 2.98–2.90   | 1   | 8.51             |
| DProHB2, LeuHB2 (m)        | 2.03        | 2.12–1.97   | 2   |                  |
| DProHB1 (m)                | 1.5         | 1.54–1.47   | 1   |                  |
| DProHA (dd)                | 4.35        | 4.38–4.33   | 1   | 3.09, 8.68       |
| DmaaNH (d)                 | 5.8         | 5.82–5.78   | 1   | 4.62             |
| DmaaNMe <sub>2</sub> (s)   | 1.86        | 1.88–1.84   | 6   |                  |
| DmaaHB2 (dd)               | 2.4         | 2.44–2.37   | 1   | 8.78, 12.32      |
| DmaaHB1 (dd)               | 2.17        | 2.20–2.14   | 1   | 5.96, 12.38      |
| DmaaHA (dt)                | 4.25        | 4.28–4.22   | 1   | 5.42, 9.03       |
| CleNH (s)                  | 7.04        | 7.06–7.02   | 1   |                  |
| CleHG2a, DProHG2 (m)       | 1.65        | 1.71–1.60   | 2   |                  |
| CleHG1 (m)                 | 1.37        | 1.43–1.29   | 2   |                  |
| CleHB2b (dt)               | 2.84        | 2.88–2.80   | 1   | 7.98, 13.95      |
| CleHB2a (dt)               | 2.65        | 2.69–2.60   | 1   | 8.20, 13.59      |
| CleHB1 (m)                 | 2.34        | 2.37–2.30   | 2   |                  |

NOESY (600 MHz, 0.01 M in C<sub>6</sub>D<sub>6</sub>, 20 °C)

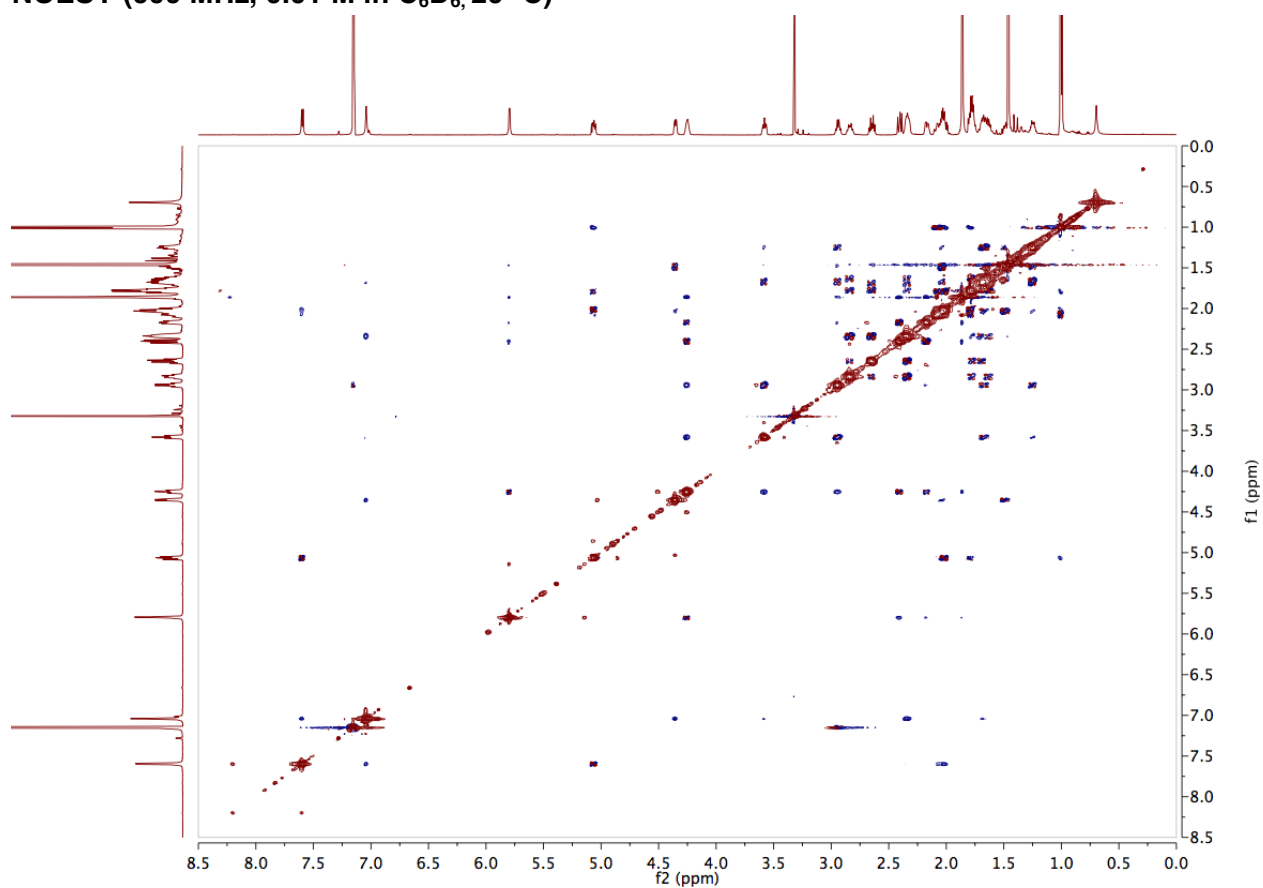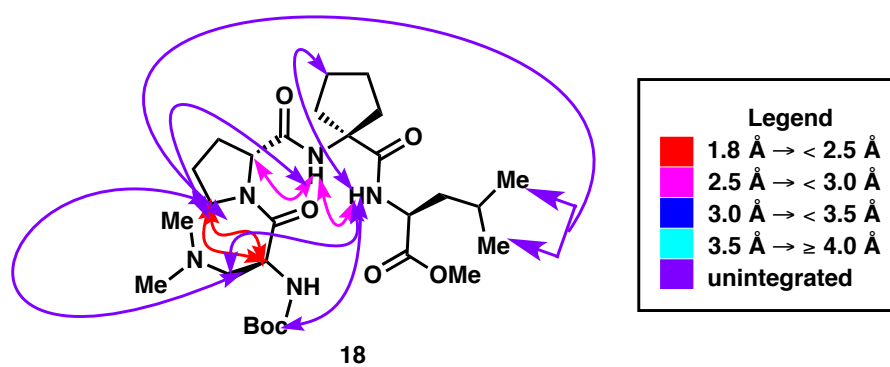

Figure S5.07: Inter-residue nOe Map for Peptide 18

**Table S5.17: Integrated NOESY Cross-peaks for Peptide 18**

|    | f2   | f1   | Normalized | Absolute | Assignment                  | Corrected Distances (Absolute) |
|----|------|------|------------|----------|-----------------------------|--------------------------------|
| 1  | 7.6  | 2.01 | -0.01      | -899.36  | LeuNH-LeuHB2                | 2.71                           |
|    | 2.02 | 7.59 | -0.02      | -1383.55 |                             |                                |
| 2  | 7.6  | 7.04 | -0.01      | -769.25  | LeuNH-CleNH                 | 2.54                           |
|    | 7.04 | 7.59 | -0.01      | -767.51  |                             |                                |
| 3  | 7.04 | 4.35 | -0.01      | -820.35  | CleNH-DProHA                | 2.54                           |
|    | 4.35 | 7.04 | -0.01      | -1112.22 |                             |                                |
| 4  | 7.03 | 2.33 | -0.03      | -2254.34 | CleNH-CleHB1                | 2.35                           |
|    | 2.33 | 7.04 | -0.03      | -2610.85 |                             |                                |
| 5  | 5.8  | 2.4  | -0.01      | -722.25  | DmaaNH-DmaaHB2              | 2.67                           |
|    | 2.41 | 5.79 | -0.01      | -718.23  |                             |                                |
| 6  | 5.8  | 2.16 | 0          | -248.57  | DmaaNH-DmaaHB1              | 3.22                           |
|    | 2.17 | 5.78 | 0          | -247.54  |                             |                                |
| 7  | 5.8  | 1.86 | 0          | -303.88  | DmaaNH-DmaaNMe <sub>2</sub> | 3.48                           |
|    | 1.86 | 5.79 | 0          | -138.03  |                             |                                |
| 8  | 5.07 | 0.99 | -0.02      | -1847.05 | LeuHA-LeuHD                 | 2.73                           |
|    | 1    | 5.06 | -0.01      | -588.97  |                             |                                |
| 9  | 4.25 | 2.93 | -0.03      | -2260.02 | DmaaHA-DProHD1              | 2.34                           |
|    | 2.93 | 4.25 | -0.03      | -2042.58 |                             |                                |
| 10 | 4.25 | 1.85 | -0.02      | -1759.36 | DmaaHA-DmaaNMe <sub>2</sub> | 2.69                           |
|    | 1.86 | 4.24 | -0.01      | -671.24  |                             |                                |
| 11 | 4.24 | 3.58 | -0.04      | -3141.27 | DmaaHA-DProHD2              | 2.21                           |
|    | 3.58 | 4.24 | -0.04      | -2950.44 |                             |                                |
| 12 | 3.58 | 2.94 | -0.12      | -9240.91 | DProHD1-DProHD2             | 1.80                           |
|    | 2.94 | 3.58 | -0.12      | -8966.64 |                             |                                |

**Table S5.18: Unintegrated NOESY Cross-peaks for Peptide 18**

LeuNH-CleHB  
 LeuNH-DmaaHB  
 LeuNH-CleHG  
 LeuNH-DmaaBoc  
 LeuNH-LeuHD  
 CleuNH-DProHD  
 DProHD-DProHB  
 DProHD-DmaaHB  
 DProHD-DmaaNMe<sub>2</sub>

# Peptide 19

<sup>1</sup>H-NMR (600 MHz, 0.01 M in C<sub>6</sub>D<sub>6</sub>, 20 °C)

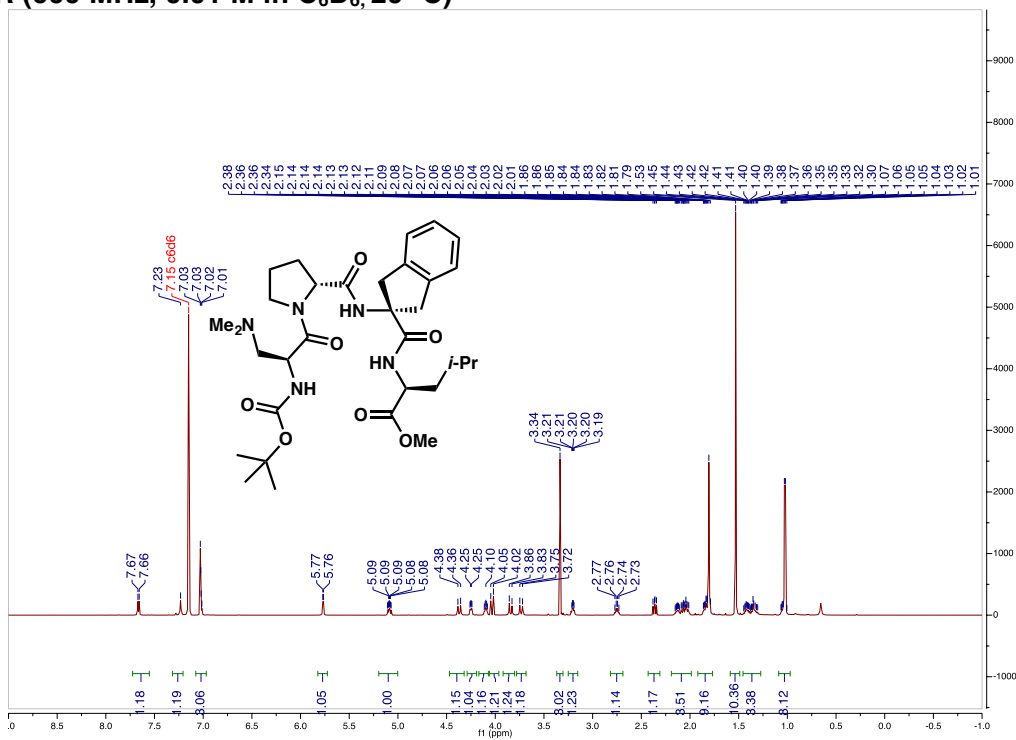

COSY (600 MHz, 0.01 M in C<sub>6</sub>D<sub>6</sub>, 20 °C)

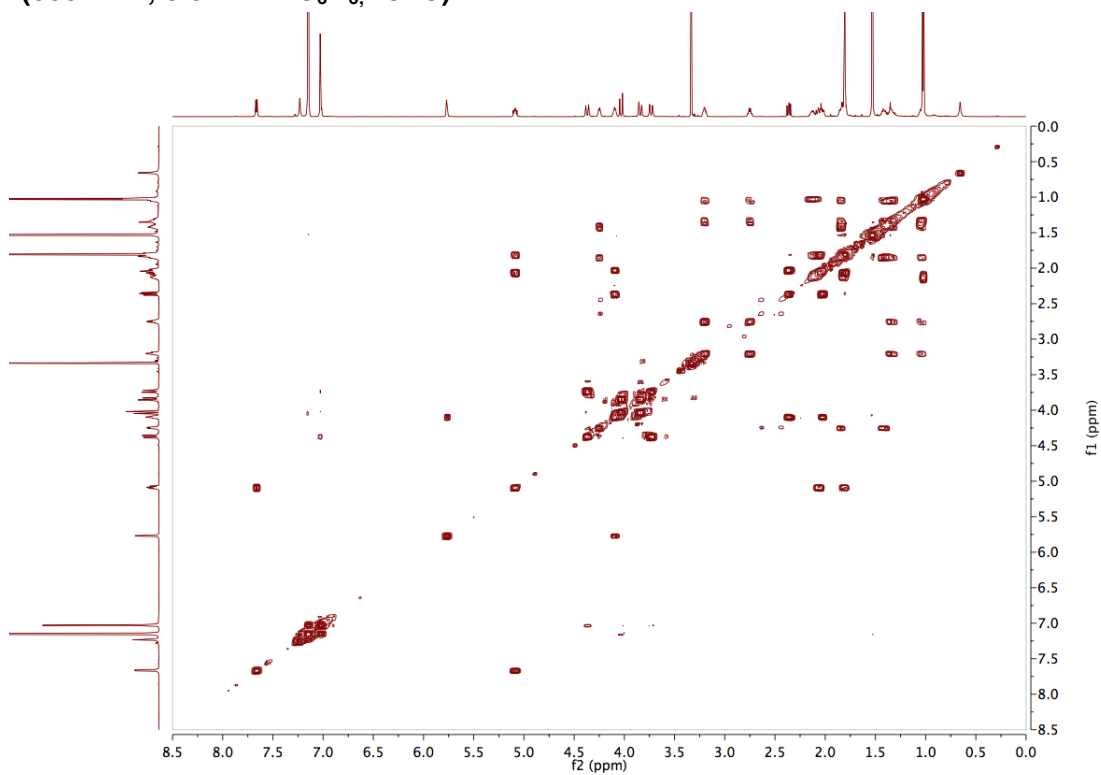



**Table S5.19: Peak Assignments for Peptide 19**

| Assignment (splitting)            | Shift (ppm) | Range (ppm) | H's | J's (Hz)          |
|-----------------------------------|-------------|-------------|-----|-------------------|
| LeuOMe (s)                        | 3.34        | 3.35–3.32   | 3   |                   |
| LeuNH (d)                         | 7.66        | 7.69–7.64   | 1   | 7.84              |
| LeuHG (m)                         | 2.12        | 2.17–2.08   | 1   |                   |
| LeuHB2 (m)                        | 2.04        | 2.08–2.00   | 2   |                   |
| LeuHA (ddd)                       | 5.09        | 5.12–5.05   | 1   | 4.66, 7.83, 10.09 |
| DProHG2 (m)                       | 1.34        | 1.38–1.29   | 1   |                   |
| DProHG1, LeuHD (d)                | 1.03        | 1.09–1.00   | 7   | 6.51              |
| DProHD2 (m)                       | 3.2         | 3.24–3.17   | 1   |                   |
| DProHD1 (q)                       | 2.75        | 2.79–2.71   | 1   | 8.20              |
| DProHB1 (m)                       | 1.41        | 1.46–1.35   | 1   |                   |
| DProHA (dd)                       | 4.25        | 4.28–4.22   | 1   | 3.71, 8.37        |
| DmaaNH (d)                        | 5.77        | 5.79–5.75   | 1   | 3.92              |
| DmaaNMe <sub>2</sub> , LeuHB1 (s) | 1.81        | 1.82–1.79   | 7   |                   |
| DmaaHB2 (dd)                      | 2.36        | 2.40–2.33   | 1   | 9.31, 12.35       |
| DmaaHB1 (m)                       | 1.83        | 1.89–1.77   | 1   |                   |
| DmaaHA (dt)                       | 4.10        | 4.13–4.06   | 1   | 4.80, 9.53        |
| DmaaBoc (s)                       | 1.53        | 1.55–1.51   | 9   |                   |
| AicNH (s)                         | 7.23        | 7.25–7.21   | 1   |                   |
| AicHB2b (d)                       | 4.37        | 4.40–4.34   | 1   | 16.78             |
| AicHB2a (d)                       | 4.03        | 4.06–4.00   | 1   | 16.64             |
| AicHB1b (d)                       | 3.84        | 3.87–3.81   | 1   | 16.66             |
| AicHB1a (d)                       | 3.73        | 3.76–3.70   | 1   | 16.75             |
| AicAr (m)                         | 7.03        | 7.05–7.00   | 4   |                   |

NOESY (600 MHz, 0.01 M in C<sub>6</sub>D<sub>6</sub>, 20 °C)

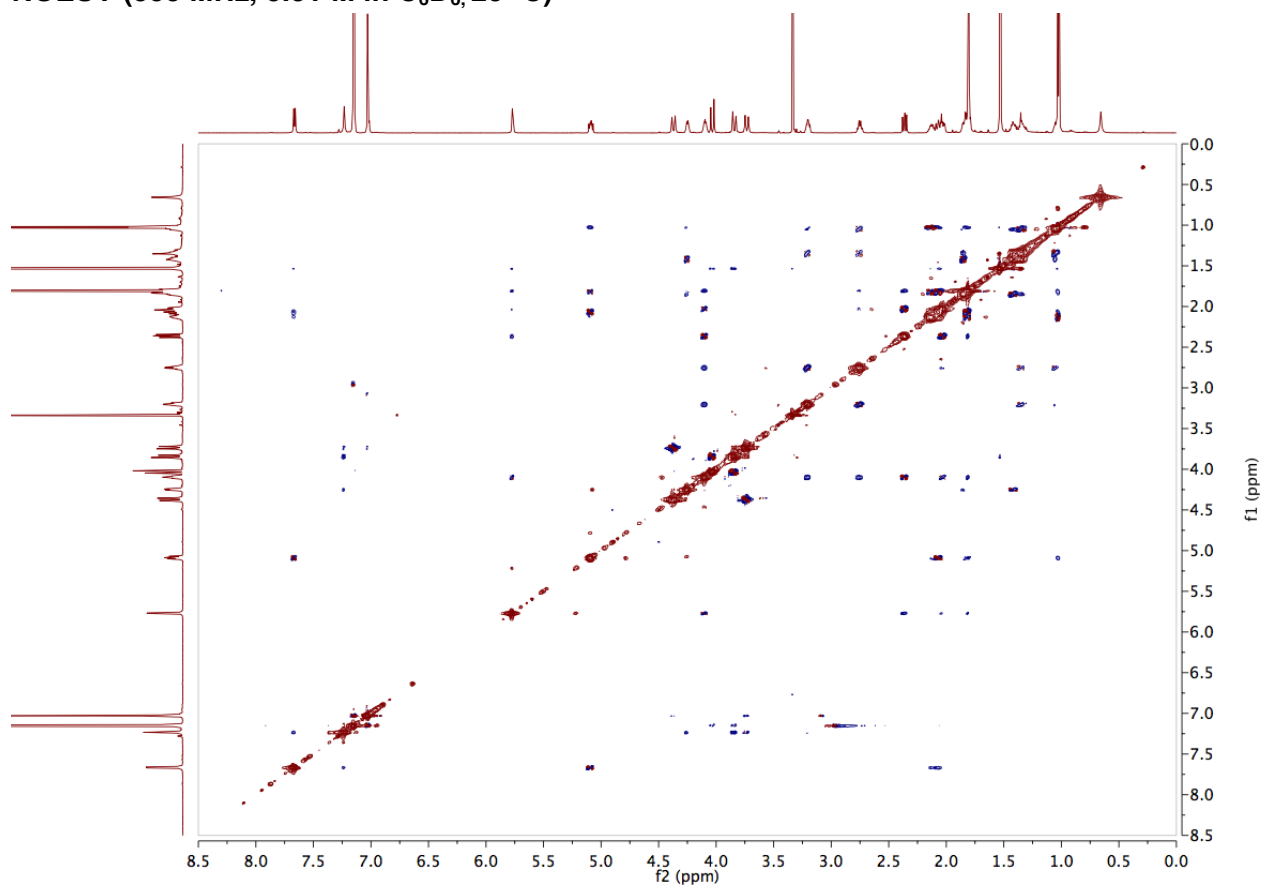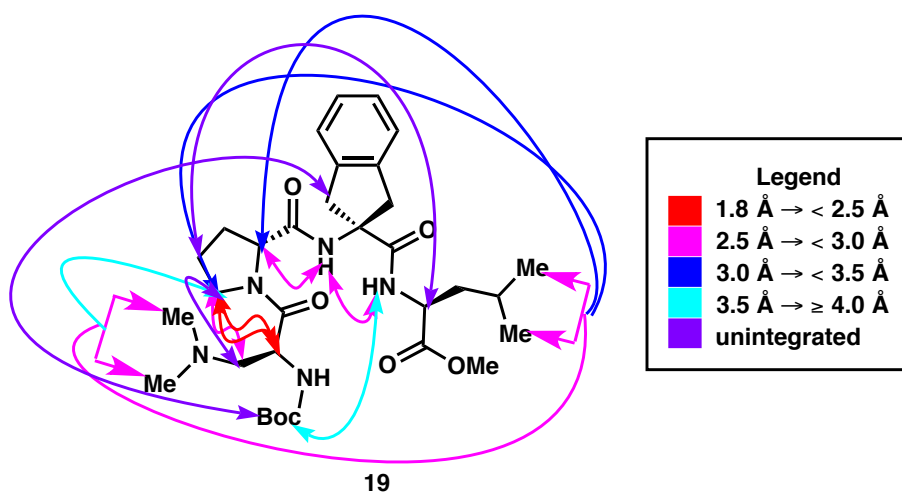

Figure S5.08: Inter-residue nOe Map for Peptide 19

**Table S5.20: Integrated NOESY Cross-peaks for Peptide 19**

|    | f2   | f1   | Normalized | Absolute | Assignment                  | Corrected Distances<br>(Normalized) |
|----|------|------|------------|----------|-----------------------------|-------------------------------------|
| 1  | 7.67 | 1.82 | -0.18      | -134.35  | LeuNH-LeuHB1                | 3.92                                |
|    | 1.83 | 7.67 | -0.15      | -110.15  |                             |                                     |
| 2  | 7.67 | 2.04 | -0.99      | -738.86  | LeuNH-LeuHB2                | 2.43                                |
|    | 2.04 | 7.67 | -1.78      | -1322.29 |                             |                                     |
| 3  | 7.67 | 7.23 | -1         | -744.34  | LeuNH-AicNH                 | 2.52                                |
|    | 7.24 | 7.67 | -0.76      | -563.35  |                             |                                     |
| 4  | 7.66 | 1.51 | -0.23      | -167.79  | LeuNH-DmaaBoc               | 3.73                                |
|    | 1.53 | 7.67 | -0.11      | -80.38   |                             |                                     |
| 5  | 7.66 | 2.14 | -0.67      | -498.32  | LeuNH-LeuHG                 | 2.82                                |
|    | 2.15 | 7.67 | -0.85      | -630.76  |                             |                                     |
| 6  | 7.24 | 4.24 | -0.72      | -532.75  | AicNH-DProHA                | 2.58                                |
|    | 4.25 | 7.23 | -1.13      | -844.49  |                             |                                     |
| 7  | 7.23 | 3.84 | -1.55      | -1150.88 | AicNH-AicHB2a               | 2.15                                |
|    | 3.84 | 7.23 | -2.53      | -1883.69 |                             |                                     |
| 8  | 7.23 | 3.72 | -0.56      | -419.15  | AicNH-AicHB2b               | 2.60                                |
|    | 3.73 | 7.23 | -0.92      | -686.09  |                             |                                     |
| 9  | 7.15 | 3.84 | -0.2       | -149.27  | AicArH-AicHB2a              | 3.42                                |
|    | 3.85 | 7.14 | -0.54      | -400.49  |                             |                                     |
| 10 | 7.14 | 4.02 | -0.15      | -111.92  | AicArH-AicHB1b              | 3.62                                |
|    | 4.03 | 7.14 | -0.36      | -267.63  |                             |                                     |
| 11 | 7.03 | 3.73 | -0.37      | -274.37  | AicArH-AicHB2b              | 3.15                                |
|    | 3.74 | 7.03 | -0.56      | -419.61  |                             |                                     |
| 12 | 7.03 | 4.36 | -0.1       | -76.57   | AicArH-AicHB1a              | 3.89                                |
|    | 4.38 | 7.02 | -0.16      | -119.1   |                             |                                     |
| 13 | 5.77 | 1.53 | -0.32      | -236.4   | DmaaNH-DmaaBoc              | 3.55                                |
|    | 1.54 | 5.77 | -0.15      | -108.06  |                             |                                     |
| 14 | 5.77 | 2.36 | -1.08      | -803.32  | DmaaNH-DmaaHB2              | 2.55                                |
|    | 2.36 | 5.75 | -1.25      | -931.52  |                             |                                     |
| 15 | 5.77 | 2.02 | -0.37      | -278.75  | DmaaNH-DmaaHB1              | 3.00                                |
|    | 2.04 | 5.79 | -0.45      | -335.44  |                             |                                     |
| 16 | 5.76 | 1.82 | -0.57      | -425.88  | DmaaNH-DmaaNMe <sub>2</sub> | 3.32                                |
|    | 1.8  | 5.8  | -0.34      | -255.79  |                             |                                     |
| 17 | 5.09 | 1.02 | -2.35      | -1752.58 | LeuHA-LeuHD                 | 2.67                                |
|    | 1.02 | 5.09 | -1.13      | -837.82  |                             |                                     |
| 18 | 4.26 | 1.02 | -0.51      | -377.43  | DProHA-LeuHD                | 3.35                                |
|    | 1.04 | 4.24 | -0.32      | -239.36  |                             |                                     |
| 19 | 4.1  | 1.81 | -2.11      | -1573.52 | DmaaHA-DmaaNMe <sub>2</sub> | 2.72                                |
|    | 1.81 | 4.1  | -1.17      | -870.15  |                             |                                     |
| 20 | 4.09 | 3.17 | -3.54      | -2632.98 | DmaaHA-DProHD2              | 2.19                                |
|    | 3.2  | 4.07 | -3.88      | -2887.86 |                             |                                     |
| 21 | 4.09 | 2.75 | -2.8       | -2081.09 | DmaaHA-DProHD1              | 2.26                                |
|    | 2.75 | 4.1  | -2.84      | -2114.8  |                             |                                     |
| 22 | 3.2  | 1.02 | -0.58      | -431.11  | DProHD2-LeuHD               | 3.25                                |
|    | 1.04 | 3.19 | -0.43      | -322.18  |                             |                                     |

|    |      |      |        |          |                                  |      |
|----|------|------|--------|----------|----------------------------------|------|
| 23 | 2.76 | 2.01 | -0.71  | -526.1   | DProHD1-<br>DmaaHB1              | 2.77 |
|    | 2.02 | 2.75 | -0.7   | -524.28  |                                  |      |
| 24 | 2.76 | 1.79 | -0.37  | -276.33  | DProHD1-<br>DmaaNMe <sub>2</sub> | 3.60 |
|    | 1.8  | 2.75 | -0.21  | -156.26  |                                  |      |
| 25 | 2.36 | 1.79 | -2.77  | -2063.39 | DmaaHB2-<br>DmaaNMe <sub>2</sub> | 2.59 |
|    | 1.81 | 2.36 | -1.36  | -1015.91 |                                  |      |
| 26 | 1.8  | 1.01 | -1.7   | -1265.07 | DmaaNMe <sub>2</sub> -LeuHD      | 2.83 |
|    | 1.03 | 1.82 | -1.6   | -1188.4  |                                  |      |
| 27 | 3.21 | 2.75 | -11.34 | -8438.15 | DProHD1-DProHD2                  | 1.80 |
|    | 2.75 | 3.2  | -10.68 | -7948.53 |                                  |      |

**Table S5.21:** Unintegrated NOESY Cross-peaks for Peptide 19

LeuHA-DProHG  
DProHA-DProHG  
AicHB-DmaaBoc  
DProHD-DmaaHB

# Peptide 21

$^1\text{H-NMR}$  (600 MHz, 0.01 M in  $\text{C}_6\text{D}_6$ , 24 °C)

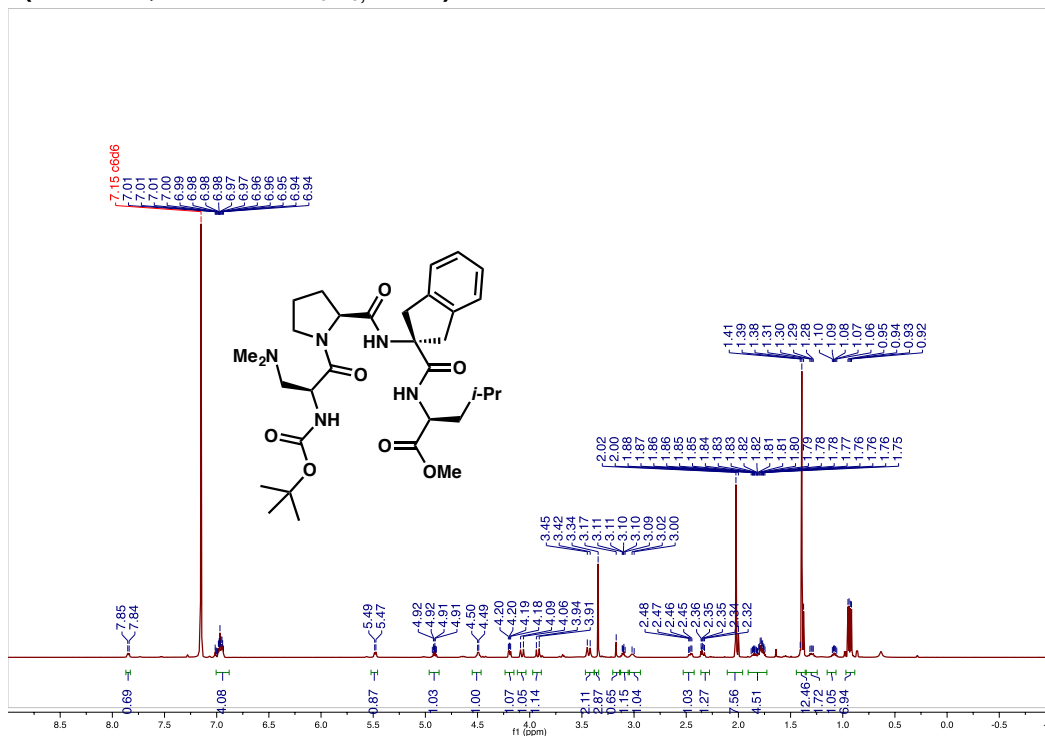

COSY (600 MHz, 0.01 M in  $\text{C}_6\text{D}_6$ , 24 °C)

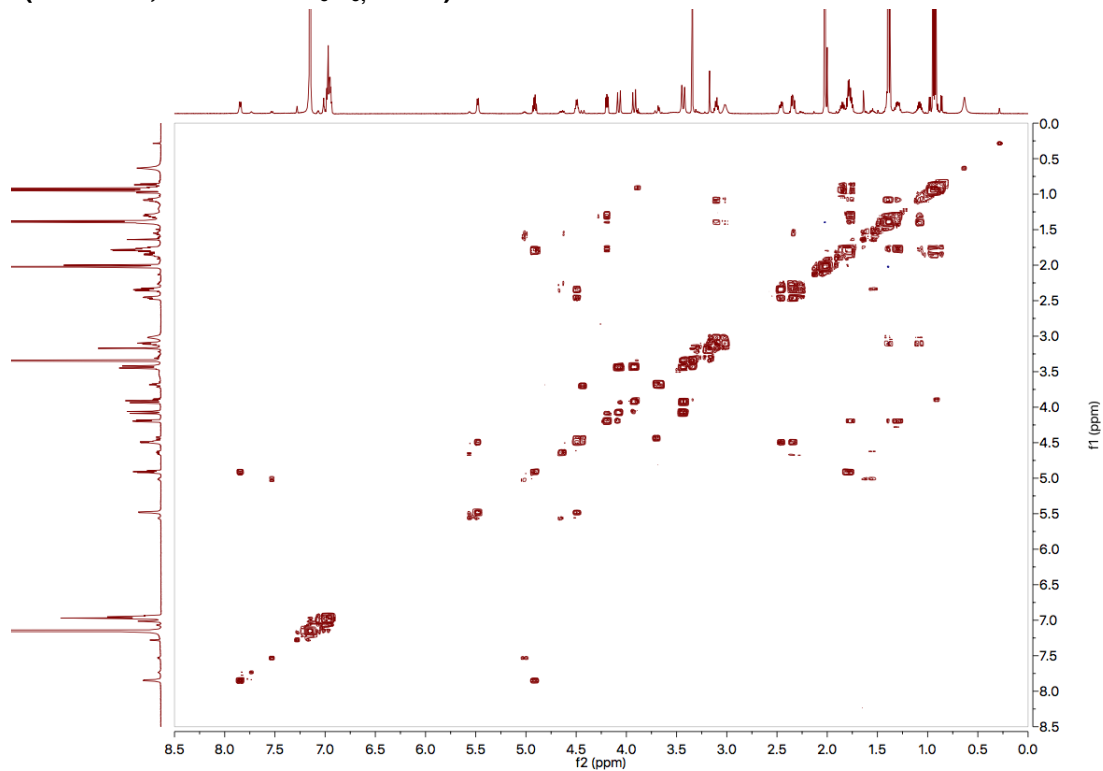

**Table S5.22: Peak Assignments for Peptide 21**

| Assignment (splitting)   | Shift (ppm) | Range (ppm) | H's | J's (Hz)    |
|--------------------------|-------------|-------------|-----|-------------|
| ProHG1 (m)               | 1.09        | 1.14–1.04   | 1   |             |
| ProHD1 (dt)              | 3.11        | 3.14–3.07   | 1   | 7.17, 9.60  |
| ProHD1 (d)               | 3.01        | 3.04–2.98   | 1   | 11.72       |
| ProHB1 (m)               | 1.3         | 1.35–1.25   | 1   |             |
| ProHA (dd)               | 4.19        | 4.22–4.17   | 1   | 4.96, 8.02  |
| LeuOMe (s)               | 3.34        | 3.36–3.33   | 3   |             |
| LeuNH (d)                | 7.85        | 7.87–7.82   | 1   | 7.98        |
| LeuHD, AicHB2b (m)       | 0.92        | 1.00–0.84   | 7   |             |
| LeuHB2 (m)               | 1.84        | 1.89–1.78   | 1   |             |
| LeuHB1, ProHB2 (m)       | 1.77        | 1.81–1.73   | 2   |             |
| LeuHA (m)                | 4.91        | 4.95–4.88   | 1   |             |
| DmaaNH (d)               | 5.48        | 5.50–5.46   | 1   | 7.14        |
| DmaaNMe <sub>2</sub> (d) | 2.01        | 2.04–1.98   | 6   | 14.2        |
| DmaaHB2 (dd)             | 2.46        | 2.49–2.43   | 1   | 6.00, 12.64 |
| DmaaHB1 (dd)             | 2.34        | 2.37–2.31   | 1   | 7.25, 12.51 |
| DmaaHA (q)               | 4.49        | 4.53–4.47   | 1   | 6.76        |
| DmaaBoc, ProHG2 (s)      | 1.39        | 1.45–1.35   | 10  |             |
| AicNH, AicAr (m)         | 6.97        | 7.09–6.92   | 5   |             |
| AicHB2b (d)              | 4.07        | 4.10–4.04   | 1   | 16.62       |
| AicHB2a (d)              | 3.92        | 3.95–3.88   | 1   | 16.54       |
| AicHB1b (d)              | 3.43        | 3.46–3.40   | 1   | 16.54       |

NOESY (600 MHz, 0.01 M in C<sub>6</sub>D<sub>6</sub>, 24 °C)

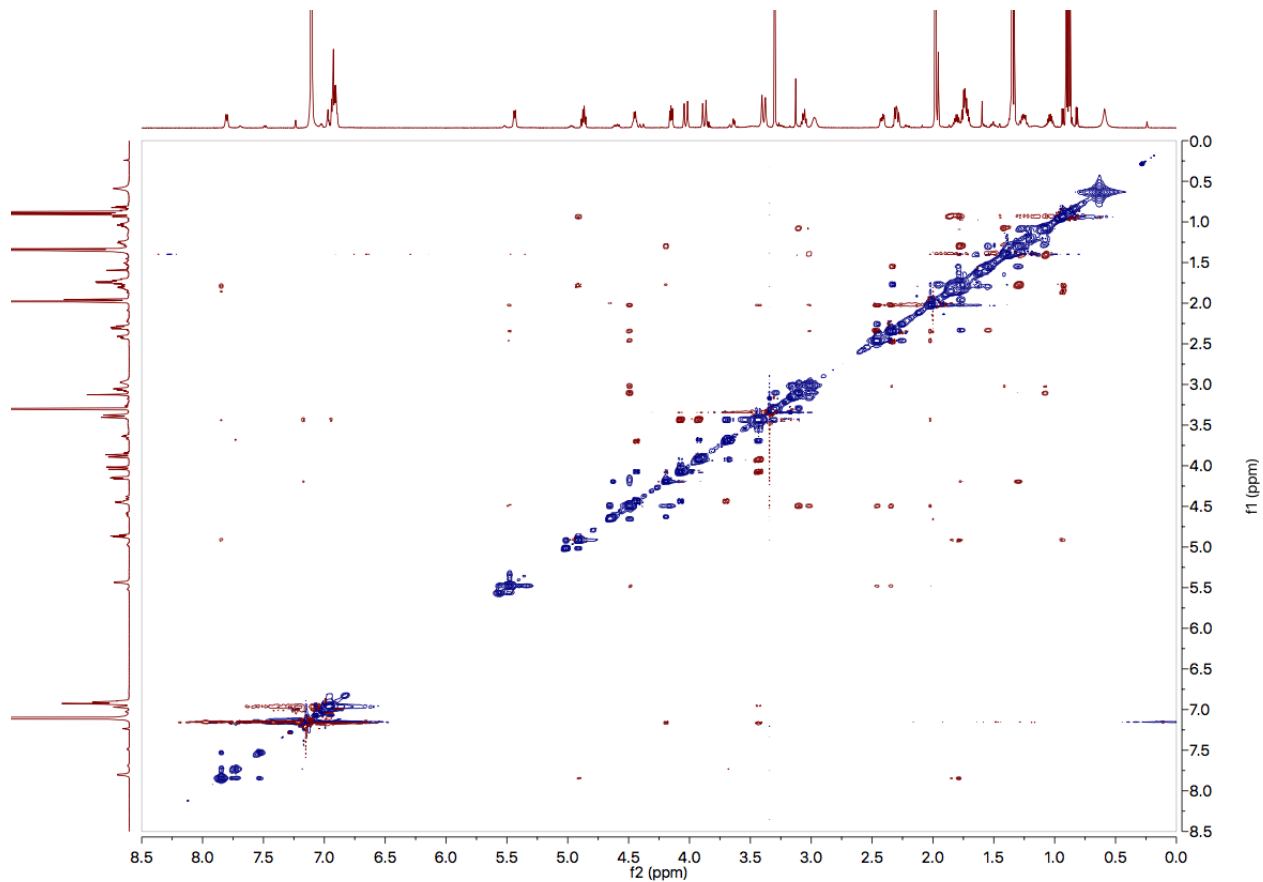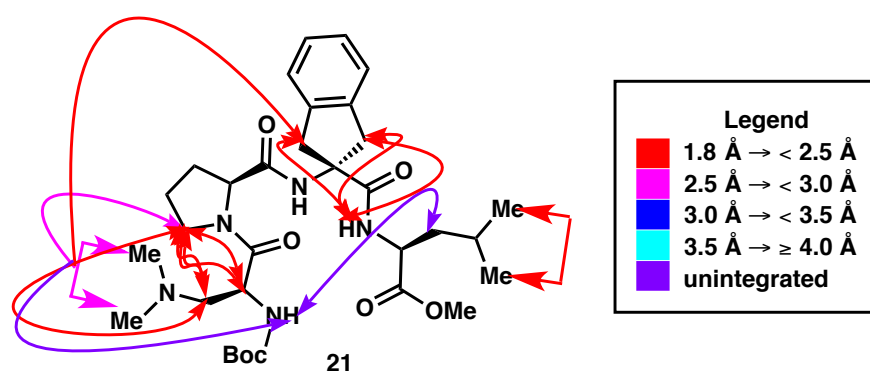

Figure S5.09: Inter-residue nOe Map for Peptide 21

**Table S5.23: Integrated NOESY Cross-peaks for Peptide 21**

|    | f2   | f1   | Normalized | Absolute | Assignment                   | Corrected Distances<br>(Absolute) |
|----|------|------|------------|----------|------------------------------|-----------------------------------|
| 1  | 7.85 | 3.92 | 0          | 74.44    | LeuNH-AicHB1b                | 2.30                              |
|    | 3.92 | 7.85 | 0          | 50.54    |                              |                                   |
| 2  | 7.84 | 4.07 | 0          | 44.75    | LeuNH-AicHB1a                | 2.47                              |
|    | 4.07 | 7.84 | 0          | 33.8     |                              |                                   |
| 3  | 7.84 | 3.44 | 0          | 89.81    | LeuNH-AicHB2a                | 2.31                              |
|    | 3.43 | 7.85 | 0          | 66.85    |                              |                                   |
| 4  | 6.95 | 3.43 | 0.01       | 180.68   | AicNH-AicHB2a                | 2.22                              |
|    | 3.43 | 6.97 | 0.01       | 208.48   |                              |                                   |
| 5  | 5.48 | 2.48 | 0.01       | 123.01   | DmaaNH-DmaaHB2               | 2.07                              |
|    | 2.47 | 5.47 | 0.01       | 183.76   |                              |                                   |
| 6  | 5.48 | 2    | 0          | 91.82    | DmaaNH-DmaaNMe <sub>2</sub>  | 2.54                              |
|    | 2.02 | 5.47 | 0          | 49.54    |                              |                                   |
| 7  | 5.48 | 2.32 | 0.01       | 153.2    | DmaaNH-DmaaHB1               | 2.06                              |
|    | 2.34 | 5.46 | 0.01       | 198.76   |                              |                                   |
| 8  | 4.91 | 0.94 | 0.03       | 585.56   | LeuHA-LeuHD                  | 2.03                              |
|    | 0.93 | 4.9  | 0.01       | 305.79   |                              |                                   |
| 9  | 4.5  | 2.99 | 0.02       | 552.94   | DmaaHA-ProHD1                | 1.70                              |
|    | 3.01 | 4.49 | 0.02       | 475.56   |                              |                                   |
| 10 | 4.48 | 3.1  | 0.05       | 1149.77  | DmaaHA-ProHD2                | 1.52                              |
|    | 3.1  | 4.49 | 0.05       | 1134.22  |                              |                                   |
| 11 | 4.48 | 2.03 | 0.02       | 439.94   | DmaaHA-DmaaNMe <sub>2</sub>  | 2.05                              |
|    | 2.02 | 4.47 | 0.01       | 148.24   |                              |                                   |
| 12 | 3.43 | 2.02 | 0.01       | 131.83   | AicHB2a-DmaaNMe <sub>2</sub> | 2.41                              |
|    | 2.02 | 3.42 | 0          | 90.86    |                              |                                   |
| 13 | 3.1  | 2.33 | 0.01       | 125.09   | ProHD2-DmaaHB1               | 2.25                              |
|    | 2.34 | 3.1  | 0          | 115.76   |                              |                                   |
| 14 | 3.02 | 1.77 | 0          | 57.79    | ProHD1-ProHB1                | 2.73                              |
|    | 1.77 | 3.03 | 0          | 57.72    |                              |                                   |
| 15 | 3.02 | 2.02 | 0          | 71.18    | ProHD1-DmaaNMe <sub>2</sub>  | 2.67                              |
|    | 2.02 | 3.01 | 0          | 34.99    |                              |                                   |
| 16 | 3.01 | 2.33 | 0.01       | 157.16   | ProHD1-DmaaHB1               | 2.10                              |
|    | 2.34 | 3    | 0.01       | 165.89   |                              |                                   |
| 17 | 3.01 | 2.46 | 0          | 87.75    | ProHD1-DmaaHB2               | 2.22                              |
|    | 2.46 | 3.02 | 0          | 115.81   |                              |                                   |
| 18 | 2.47 | 2.32 | 0.03       | 694.61   | DmaaHB2-DmaaHB1              | 1.80                              |
|    | 2.33 | 2.47 | 0.01       | 243.41   |                              |                                   |

**Table S5.24: Unintegrated NOESY Cross-peaks for Peptide 21**

LeuHA-LeuHB  
DmaaNH-LeuHB  
DmaaNH-LeuHD





**Table S5.25: Peak Assignments for Peptide 22**

| Assignment (splitting)          | Shift (ppm) | Range (ppm) | H's | J's (Hz)    |
|---------------------------------|-------------|-------------|-----|-------------|
| LeuOMe (s)                      | 3.31        | 3.32–3.29   | 3   |             |
| LeuNH (d)                       | 7.52        | 7.54–7.49   | 1   | 8.23        |
| LeuHD (dd)                      | 1           | 1.03–0.97   | 6   | 6.52, 8.86  |
| DProHG2 (m)                     | 1.77        | 1.83–1.71   | 1   |             |
| DProHG1 (m)                     | 1.29        | 1.33–1.24   | 1   |             |
| DProHD2 (m)                     | 3.65        | 3.69–3.62   | 1   |             |
| DProHD1 (q)                     | 3           | 3.03–2.96   | 1   | 8.71        |
| DProHB (m)                      | 2.04        | 2.13–1.96   | 2   |             |
| DProHA, DmaaHA (m)              | 4.36        | 4.40–4.32   | 2   |             |
| DmaaNH (d)                      | 5.84        | 5.86–5.82   | 1   | 5.26        |
| DmaanMe <sub>2</sub> (s)        | 1.9         | 1.91–1.88   | 6   |             |
| DmaaHB2 (dd)                    | 2.41        | 2.44–2.37   | 1   | 8.29, 12.31 |
| DmaaHB1, AchcHB1b, AchcHB1a (m) | 2.21        | 2.30–2.13   | 3   |             |
| DmaaBoc (s)                     | 1.44        | 1.46–1.42   | 9   |             |
| AchcNH (s)                      | 6.86        | 6.87–6.84   | 1   |             |
| AchcHG2b (m)                    | 1.62        | 1.65–1.59   | 1   |             |
| AchcHG1 (m)                     | 1.51        | 1.59–1.45   | 2   |             |
| AchcHD2 (m)                     | 1.4         | 1.43–1.33   | 1   |             |
| AchcHD1 (m)                     | 1.16        | 1.21–1.10   | 1   |             |
| AchcHB2b (d)                    | 2.75        | 2.78–2.72   | 1   | 13.86       |
| AchcHB2a (d)                    | 2.47        | 2.50–2.44   | 1   | 14.12       |

NOESY (600 MHz, 0.01 M in C<sub>6</sub>D<sub>6</sub>, 20 °C)

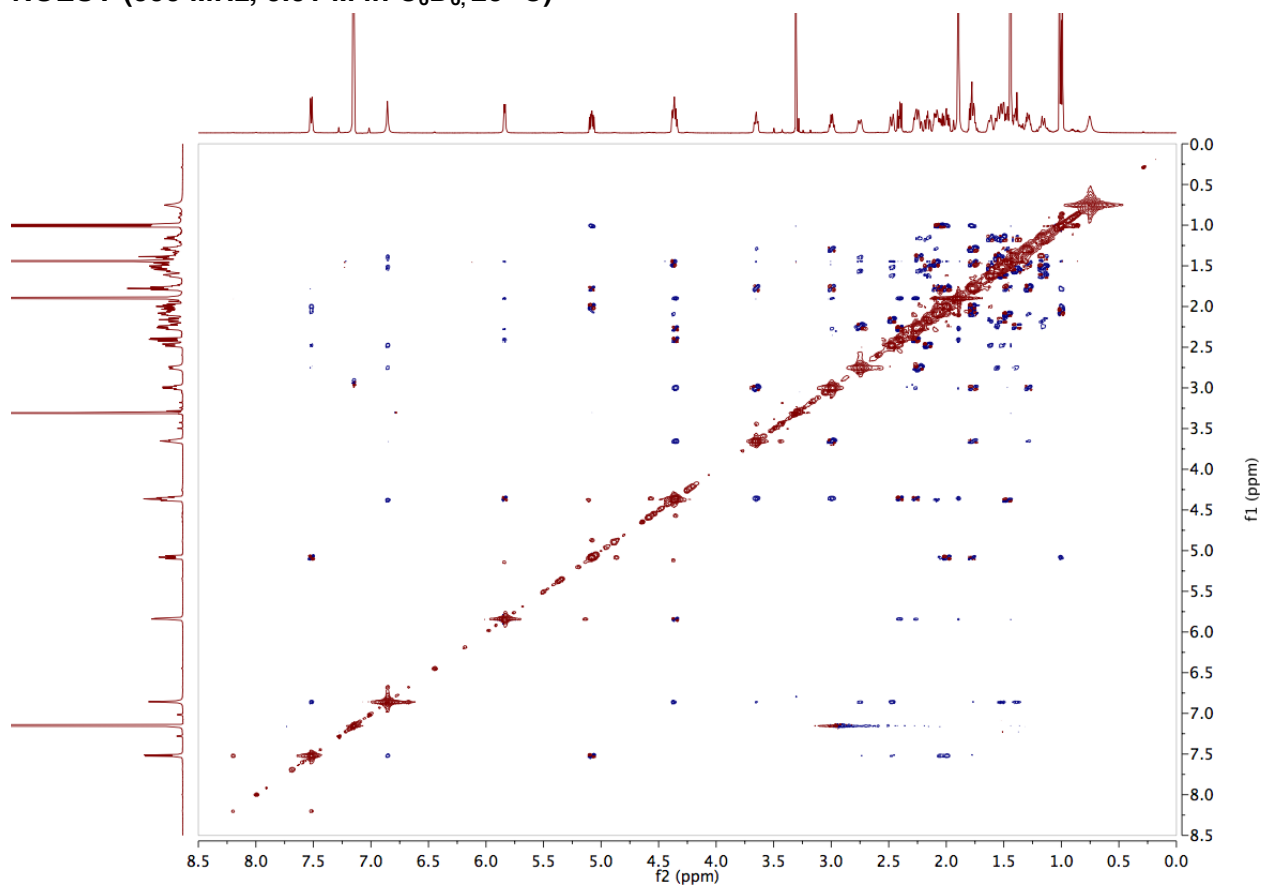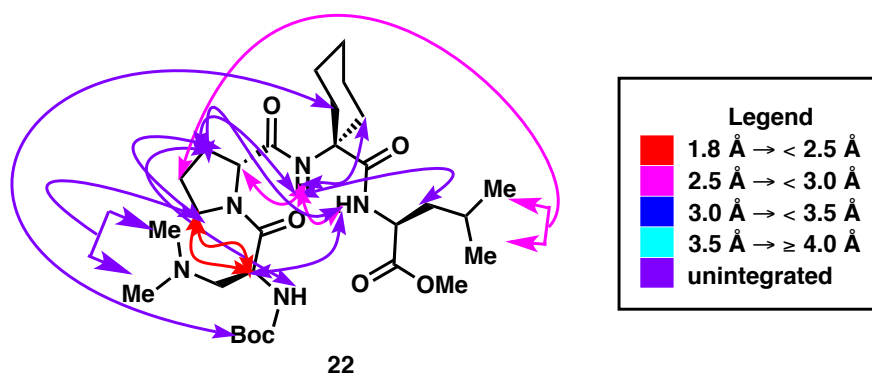

Figure S5.10: Inter-residue nOe Map for Peptide **22**

**Table S5.26: Integrated NOESY Cross-peaks for Peptide 22**

|    | f2   | f1   | Normalized | Absolute | Assignment                   | Corrected Distances<br>(Normalized) |
|----|------|------|------------|----------|------------------------------|-------------------------------------|
| 1  | 7.51 | 1.98 | -1         | -1033.23 | LeuNH-LeuHB2                 | 2.52                                |
|    | 1.98 | 7.51 | -0.82      | -848.76  |                              |                                     |
| 2  | 7.51 | 6.86 | -0.78      | -802.01  | LeuNH-AchcNH                 | 2.52                                |
|    | 6.84 | 7.52 | -0.78      | -800.57  |                              |                                     |
| 3  | 6.85 | 2.47 | -0.83      | -857.38  | AchcNH-AchcHB2a              | 2.43                                |
|    | 2.47 | 6.86 | -0.92      | -945.55  |                              |                                     |
| 4  | 6.84 | 4.38 | -0.86      | -881.72  | AchcNH-DProHA                | 2.67                                |
|    | 4.36 | 6.85 | -0.91      | -933.27  |                              |                                     |
| 5  | 5.08 | 1.01 | -1.78      | -1835.88 | LeuHA-LeuHD                  | 2.77                                |
|    | 1    | 5.08 | -0.93      | -956.98  |                              |                                     |
| 6  | 4.35 | 1.9  | -1.57      | -1620.28 | DmaaHA-DmaaNMe <sub>2</sub>  | 2.72                                |
|    | 1.89 | 4.35 | -0.85      | -877.4   |                              |                                     |
| 7  | 4.34 | 3.65 | -2.44      | -2514.44 | DmaaHA-DProHD2               | 2.28                                |
|    | 3.64 | 4.35 | -2.83      | -2918.57 |                              |                                     |
| 8  | 4.34 | 3    | -1.83      | -1885.67 | DmaaHA-DProHD1               | 2.40                                |
|    | 2.99 | 4.35 | -2.08      | -2145.01 |                              |                                     |
| 9  | 2.4  | 1.89 | -2.04      | -2101.45 | DmaaHB2-DmaaNMe <sub>2</sub> | 2.52                                |
|    | 1.89 | 2.4  | -1.01      | -1039.65 |                              |                                     |
| 10 | 2.25 | 1.9  | -1.79      | -1848.67 | DmaaHB1-DmaaNMe <sub>2</sub> | 2.61                                |
|    | 1.89 | 2.27 | -0.96      | -984.04  |                              |                                     |
| 11 | 1.77 | 1    | -1.73      | -1781.7  | DProHG1-LeuHD                | 2.83                                |
|    | 0.99 | 1.77 | -1.09      | -1118.4  |                              |                                     |
| 12 | 3.65 | 3    | -8.14      | -8387.59 | DProHD1-DProHD2              | 1.80                                |
|    | 2.99 | 3.65 | -8.05      | -8294.98 |                              |                                     |

**Table S5.27: Unintegrated NOESY Cross-peaks for Peptide 22**

LeuNH-DmaaHA  
 LeuNH-AchcHB  
 LeuNH-DProHB  
 LeuNH-LeuHD  
 AchcNH-AchcHB  
 AchcNH-DProHB  
 DmaaNH-DmaaNMe<sub>2</sub>  
 DmaaNH-DProHB  
 DProHD-DmaaNMe<sub>2</sub>  
 AchcHB-DmaaBoc

# Peptide 25

<sup>1</sup>H-NMR (600 MHz, 0.01 M in C<sub>6</sub>D<sub>6</sub>, 20 °C)

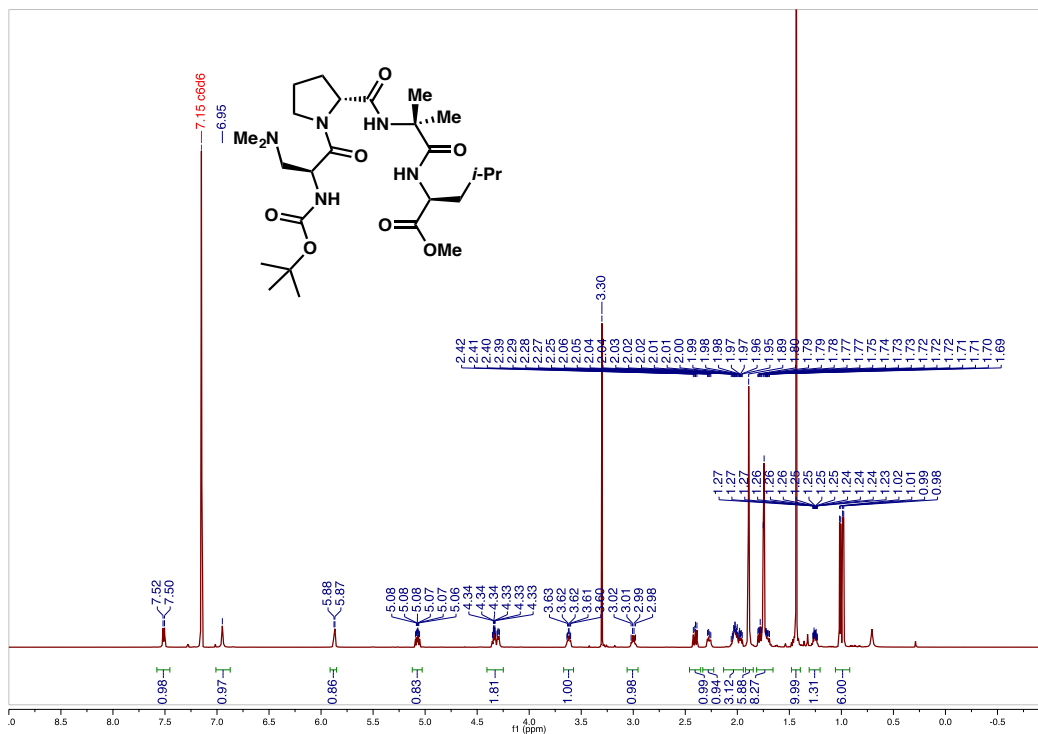

COSY (600 MHz, 0.01 M in C<sub>6</sub>D<sub>6</sub>, 20 °C)

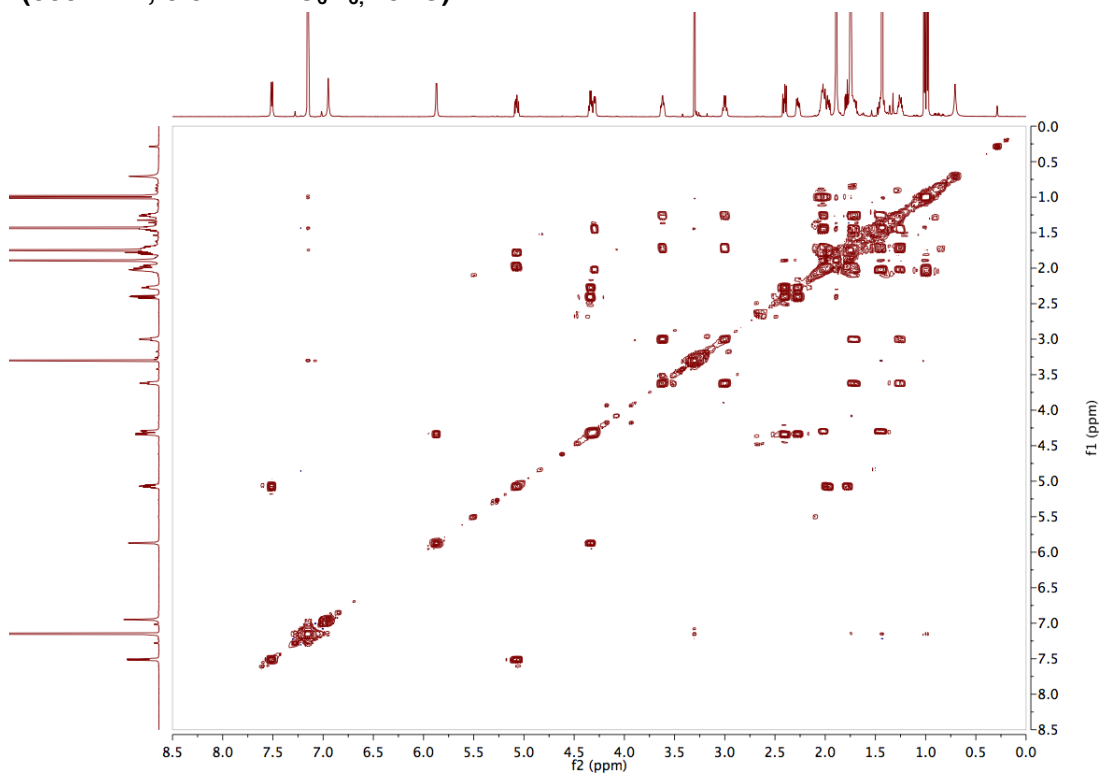

**Table S5.28: Peak Assignments for Peptide 25**

| Assignment (splitting)          | Shift (ppm) | Range (ppm) | H's | J's (Hz)         |
|---------------------------------|-------------|-------------|-----|------------------|
| LeuOMe (s)                      | 3.3         | 3.32–3.28   | 3   |                  |
| LeuNH (d)                       | 7.51        | 7.54–7.49   | 1   | 8.3              |
| LeuHD (dd)                      | 1           | 1.03–0.96   | 6   | 6.54, 17.32      |
| LeuHG, DmaaNMe <sub>2</sub> (s) | 1.89        | 1.91–1.87   | 7   |                  |
| LeuHB2 (m)                      | 1.97        | 1.99–1.95   | 1   |                  |
| LeuHB1 (m)                      | 1.78        | 1.82–1.76   | 1   |                  |
| LeuHA (ddd)                     | 5.07        | 5.11–5.04   | 1   | 4.80, 8.27, 9.87 |
| DProHG2 (m)                     | 1.71        | 1.73–1.66   | 1   |                  |
| DProHG1 (m)                     | 1.26        | 1.30–1.21   | 1   |                  |
| DProHD2 (td)                    | 3.62        | 3.65–3.59   | 1   | 3.91, 8.91       |
| DProHD1 (q)                     | 3           | 3.04–2.96   | 1   | 8.35             |
| DProHB2 (m)                     | 2.02        | 2.04–1.99   | 1   |                  |
| DProHB1 (m)                     | 1.46        | 1.48–1.43   | 1   |                  |
| DProHA (dd)                     | 4.3         | 4.31–4.27   | 1   | 3.43, 8.54       |
| DmaaNH (d)                      | 5.87        | 5.89–5.85   | 2   | 5.23             |
| DmaaHB2 (dd)                    | 2.41        | 2.44–2.37   | 1   | 8.31, 12.31      |
| DmaaHB1 (dd)                    | 2.27        | 2.30–2.24   | 1   | 6.34, 12.38      |
| DmaaHA (m)                      | 4.34        | 4.37–4.32   | 1   |                  |
| DmaaBoc (s)                     | 1.43        | 1.44–1.42   | 9   |                  |
| AibNH (s)                       | 6.95        | 6.96–6.93   | 1   |                  |
| AibMe (d)                       | 1.75        | 1.76–1.73   | 6   | 5.33             |

NOESY (600 MHz, 0.01 M in C<sub>6</sub>D<sub>6</sub>, 20 °C)

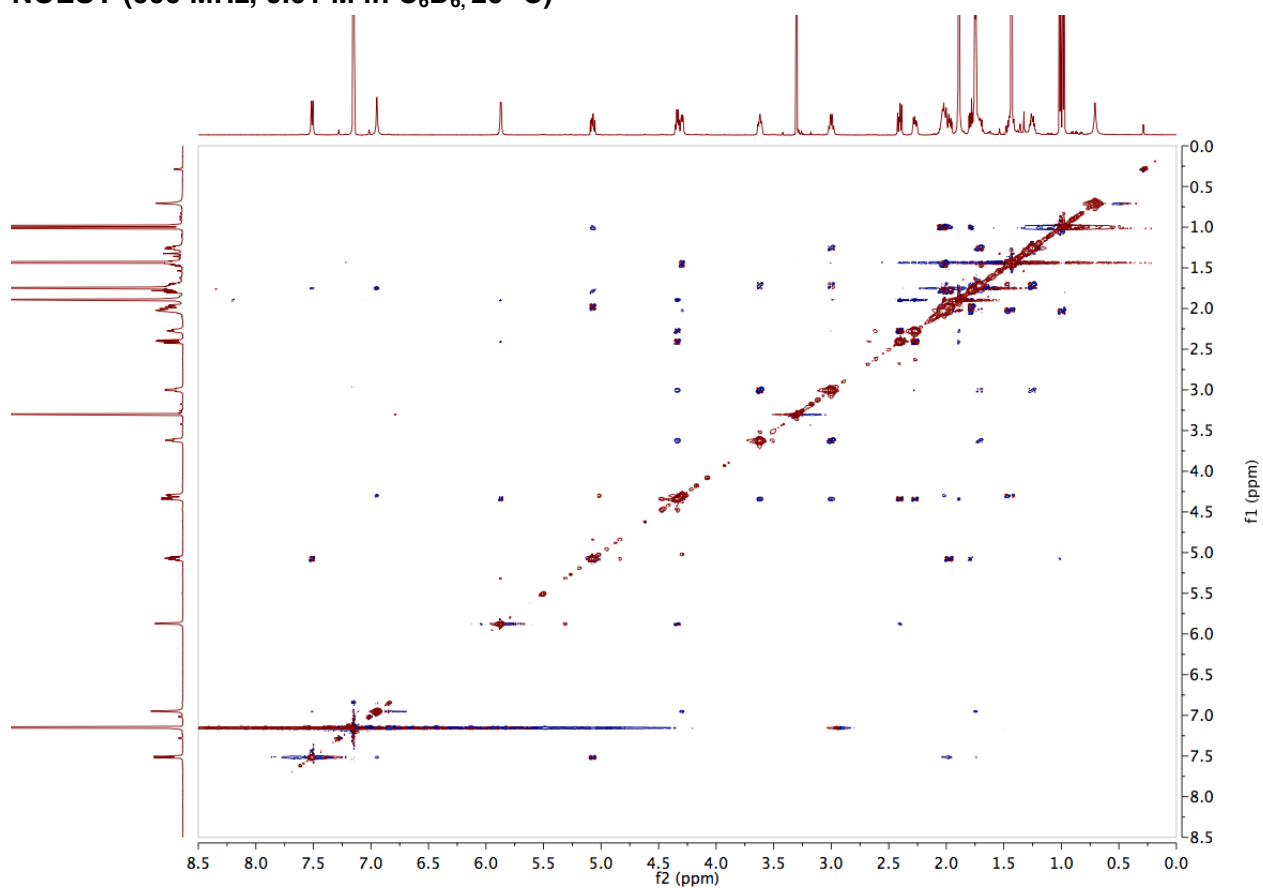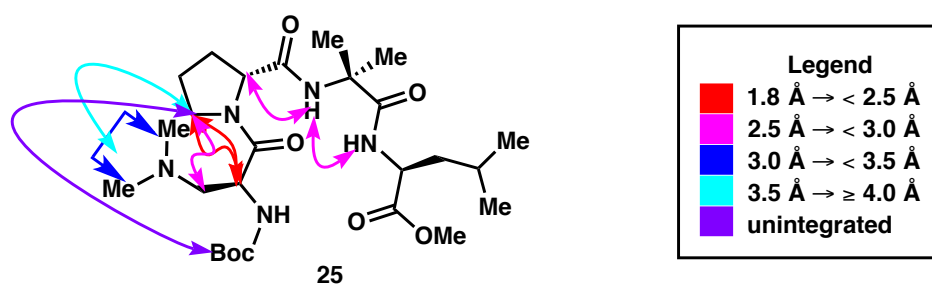

Figure S5.11: Inter-residue nOe Map for Peptide 25

**Table S5.29: Integrated NOESY Cross-peaks for Peptide 25**

|    | f2   | f1   | Normalized | Absolute | Assignment                   | Corrected Distances (Normalized) |
|----|------|------|------------|----------|------------------------------|----------------------------------|
| 1  | 7.51 | 1.98 | 1          | 788.96   | LeuNH-LeuHB2                 | 2.63                             |
|    | 1.98 | 7.51 | 1.21       | 951.33   |                              |                                  |
| 2  | 7.51 | 1.75 | 0.99       | 783.52   | LeuNH-LeuHB1                 | 2.66                             |
|    | 1.75 | 7.51 | 0.69       | 541.14   |                              |                                  |
| 3  | 7.51 | 6.95 | 0.84       | 663.63   | LeuNH-AibNH                  | 2.59                             |
|    | 6.95 | 7.51 | 0.95       | 751.16   |                              |                                  |
| 4  | 6.95 | 4.3  | 1.37       | 1081.53  | AibNH-DProHA                 | 2.53                             |
|    | 4.3  | 6.95 | 1.39       | 1093.24  |                              |                                  |
| 5  | 6.95 | 1.76 | 3.11       | 2451.55  | AibNH-AibMe                  | 2.19                             |
|    | 1.74 | 6.95 | 2.01       | 1585.33  |                              |                                  |
| 6  | 5.87 | 2.28 | 0.42       | 328.3    | DmaaNH-DmaaHB1               | 3.02                             |
|    | 2.27 | 5.87 | 0.46       | 364.6    |                              |                                  |
| 7  | 5.87 | 1.9  | 0.38       | 297.36   | DmaaNH-DmaanMe <sub>2</sub>  | 3.43                             |
|    | 1.89 | 5.87 | 0.25       | 193.42   |                              |                                  |
| 8  | 5.87 | 2.41 | 0.85       | 674.05   | DmaaNH-DmaaHB2               | 2.65                             |
|    | 2.4  | 5.87 | 1.03       | 809.24   |                              |                                  |
| 9  | 5.07 | 1    | 2.07       | 1630.17  | LeuHA-LeuHD                  | 2.79                             |
|    | 1.01 | 5.07 | 1.03       | 810.7    |                              |                                  |
| 10 | 4.34 | 1.89 | 2.29       | 1807.37  | DmaaHA-DmaanMe <sub>2</sub>  | 2.64                             |
|    | 1.89 | 4.34 | 1.14       | 896.11   |                              |                                  |
| 11 | 4.34 | 3.62 | 3.6        | 2836.7   | DmaaHA-DProHD2               | 2.22                             |
|    | 3.62 | 4.33 | 3.56       | 2808.34  |                              |                                  |
| 12 | 4.33 | 3    | 2.7        | 2128.97  | DmaaHA-DProHD1               | 2.32                             |
|    | 2.99 | 4.34 | 2.66       | 2099.13  |                              |                                  |
| 13 | 3    | 1.44 | 0.5        | 391.33   | DProHD1-DProHB1              | 3.40                             |
|    | 1.46 | 3    | 0.23       | 177.56   |                              |                                  |
| 14 | 3    | 2.26 | 0.77       | 606.57   | DProHD1-DmaaHB1              | 2.77                             |
|    | 2.27 | 3    | 0.78       | 611.92   |                              |                                  |
| 15 | 2.99 | 1.89 | 0.38       | 296.14   | DProHD1-DmaanMe <sub>2</sub> | 3.50                             |
|    | 1.89 | 3    | 0.2        | 155.29   |                              |                                  |
| 16 | 2.4  | 1.89 | 2.48       | 1953.47  | DmaaHB2-DmaanMe <sub>2</sub> | 2.56                             |
|    | 1.89 | 2.4  | 1.19       | 942.54   |                              |                                  |
| 17 | 2.27 | 1.89 | 2.04       | 1608.18  | DmaaHB1-DmaanMe <sub>2</sub> | 2.65                             |
|    | 1.9  | 2.27 | 0.98       | 770.23   |                              |                                  |
| 18 | 1.78 | 1    | 1.52       | 1197.13  | LeuHB1-LeuHD                 | 2.82                             |
|    | 0.99 | 1.79 | 1.06       | 832.35   |                              |                                  |
| 19 | 3.62 | 3    | 11.08      | 8743.76  | DProHD1-DProHD2              | 1.80                             |
|    | 3    | 3.62 | 10.83      | 8546     |                              |                                  |

**Table S5.30: Unintegrated NOESY Cross-peaks for Peptide 25**

LeuNH-LeuHB  
 AibNH-AibMe  
 DmaaNH-DmaanMe<sub>2</sub>  
 DmaaHA-DmaanMe<sub>2</sub>  
 DProHD-DmaaBoc



# Peptide 30

$^1\text{H-NMR}$  (600 MHz, 0.01 M in  $\text{C}_6\text{D}_6$ , 24 °C)

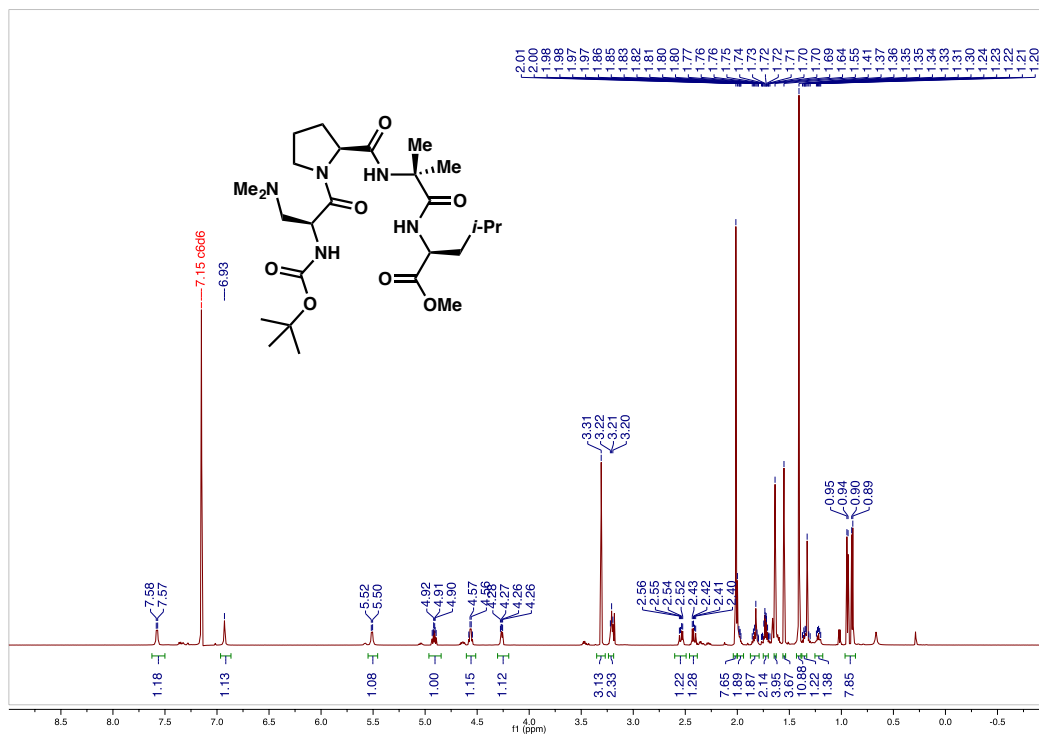

COSY (600 MHz, 0.01 M in  $\text{C}_6\text{D}_6$ , 24 °C)

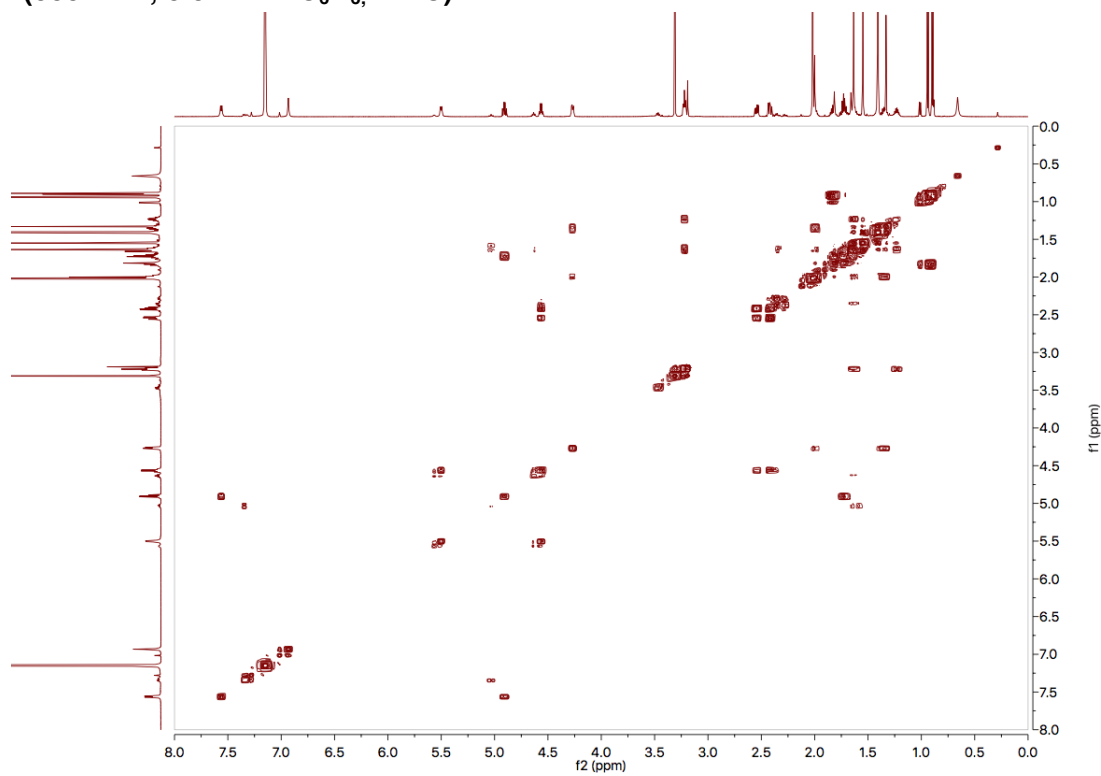

**Table S5.31: Peak Assignments for Peptide 30**

| Assignment (splitting)   | Shift (ppm) | Range (ppm) | H's | J's (Hz)    |
|--------------------------|-------------|-------------|-----|-------------|
| ProHG2 (m)               | 1.64        | 1.68–1.58   | 1   |             |
| ProHG1 (tt)              | 1.23        | 1.28–1.18   | 1   | 12.27, 6.02 |
| ProHD (m)                | 3.21        | 3.25–3.17   | 2   |             |
| ProHB2 (m)               | 2           | 2.02–1.96   | 1   |             |
| ProHB1 (m)               | 1.35        | 1.39–1.30   | 1   |             |
| ProHA (dd)               | 4.27        | 4.30–4.24   | 1   | 4.25, 8.07  |
| LeuOMe (s)               | 3.31        | 3.33–3.29   | 3   |             |
| LeuNH (d)                | 7.56        | 7.59–7.54   | 1   | 7.97        |
| LeuHD (dd)               | 0.92        | 0.96–0.87   | 6   | 6.55, 26.50 |
| LeuHG (m)                | 1.82        | 1.88–1.78   | 1   |             |
| LeuHB (m)                | 1.73        | 1.78–1.67   | 2   |             |
| LeuHA (td)               | 4.91        | 4.94–4.87   | 1   | 5.90, 8.40  |
| DmaaNH (d)               | 5.5         | 5.52–5.48   | 1   | 7.36        |
| DmaaNMe <sub>2</sub> (s) | 2.02        | 2.03–2.00   | 6   |             |
| DmaaHB2 (dd)             | 2.54        | 2.58–2.51   | 1   | 6.33, 12.52 |
| DmaaHB1 (dd)             | 2.42        | 2.45–2.39   | 1   | 6.95, 12.53 |
| DmaaHA (q)               | 4.56        | 4.60–4.53   | 1   | 6.92        |
| DmaaBoc (s)              | 1.41        | 1.42–1.39   | 9   |             |
| AibNH (s)                | 6.93        | 6.95–6.92   | 1   |             |
| AibMe <sub>2</sub> (s)   | 1.63        | 1.65–1.62   | 3   |             |
| AibMe <sub>1</sub> (s)   | 1.55        | 1.57–1.53   | 3   |             |

NOESY (600 MHz, 0.01 M in C<sub>6</sub>D<sub>6</sub>, 24 °C)

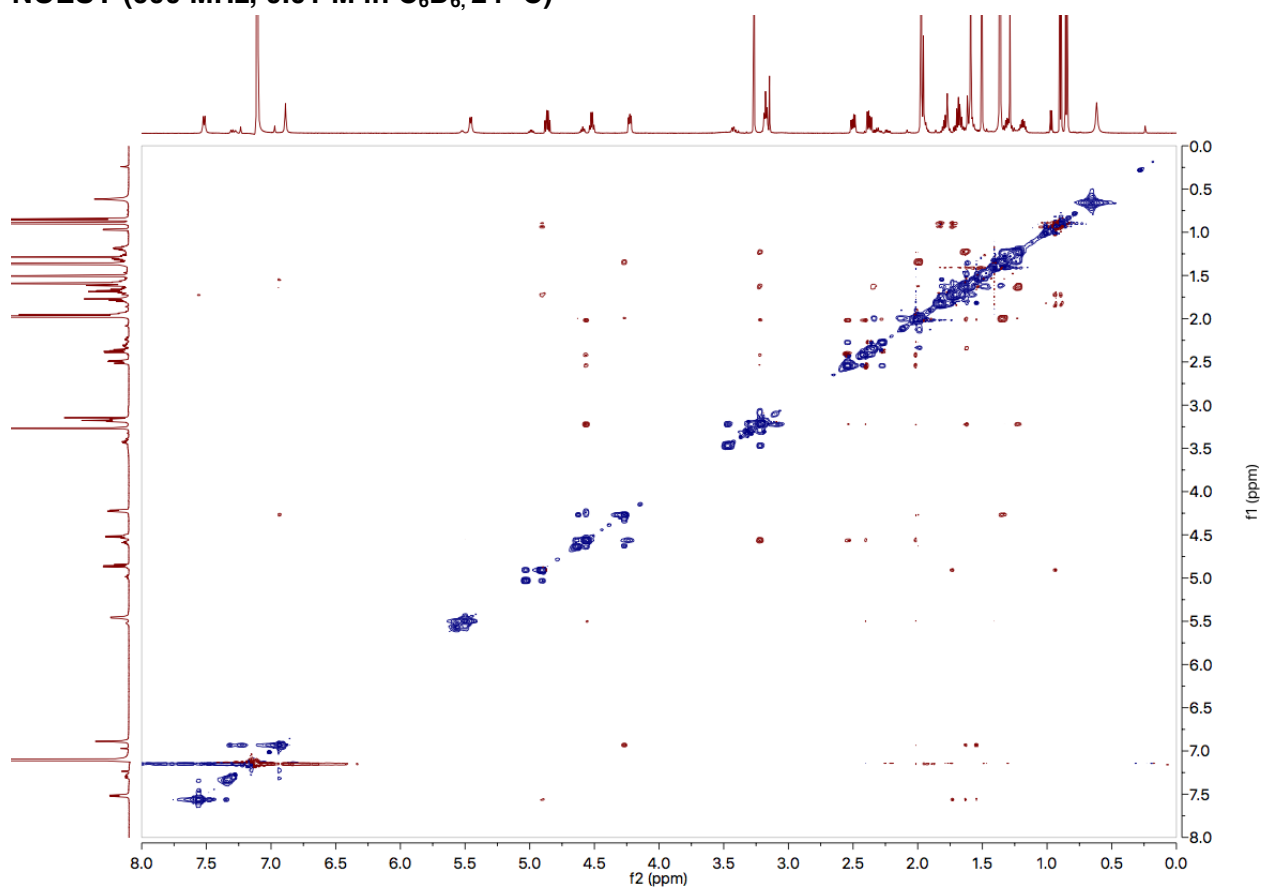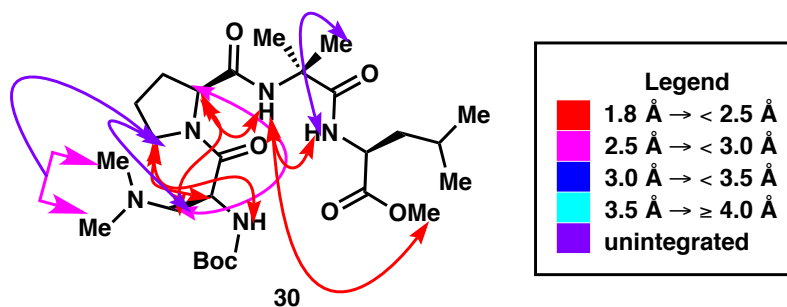

Figure S5.12: Inter-residue nOe Map for Peptide 30

**Table S5.32: Integrated NOESY Cross-peaks for Peptide 30**

|    | f2   | f1   | Normalized | Absolute | Assignment                   | Corrected Distances<br>(Normalized) |
|----|------|------|------------|----------|------------------------------|-------------------------------------|
| 1  | 7.56 | 1.54 | 0.9        | 88.93    | LeuNH-LeuOMe                 | 2.65                                |
|    | 1.54 | 7.56 | 1.04       | 102.81   |                              |                                     |
| 2  | 7.56 | 6.93 | 1          | 98.91    | LeuNH-AibNH                  | 2.34                                |
|    | 6.93 | 7.56 | 0.65       | 64.2     |                              |                                     |
| 3  | 7.56 | 1.83 | 0.97       | 96.07    | LeuNH-LeuHG                  | 2.68                                |
|    | 1.83 | 7.56 | 0.88       | 87.44    |                              |                                     |
| 4  | 7.55 | 1.72 | 3.1        | 306.46   | LeuNH-LeuHB                  | 2.22                                |
|    | 1.72 | 7.56 | 3.47       | 342.89   |                              |                                     |
| 5  | 6.93 | 1.54 | 1.84       | 181.97   | AibNH-LeuOMe                 | 2.18                                |
|    | 1.53 | 6.93 | 3.59       | 354.6    |                              |                                     |
| 6  | 6.93 | 1.63 | 1.39       | 137.58   | AibNH-AibMe2                 | 2.49                                |
|    | 1.63 | 6.93 | 2.58       | 254.78   |                              |                                     |
| 7  | 6.92 | 4.26 | 3          | 296.4    | AibNH-ProHA                  | 1.92                                |
|    | 4.27 | 6.92 | 6.96       | 688.86   |                              |                                     |
| 8  | 5.52 | 2.54 | 1.26       | 124.86   | DmaaNH-DmaaHB2               | 2.49                                |
|    | 2.53 | 5.47 | 1.64       | 162.24   |                              |                                     |
| 9  | 5.49 | 2.41 | 1.91       | 189.05   | DmaaNH-DmaaHB1               | 2.33                                |
|    | 2.4  | 5.47 | 1.22       | 120.56   |                              |                                     |
| 10 | 5.49 | 4.55 | 1.98       | 196.16   | DmaaNH-ProHD                 | 2.34                                |
|    | 4.56 | 5.49 | 2.21       | 218.89   |                              |                                     |
| 11 | 5.49 | 2.02 | 1.01       | 99.91    | DmaaNH-DmaaNMe <sub>2</sub>  | 2.96                                |
|    | 2.01 | 5.47 | 0.64       | 63.35    |                              |                                     |
| 12 | 4.9  | 0.94 | 3.07       | 303.73   | LeuHA-LeuHD2                 | 2.40                                |
|    | 0.94 | 4.9  | 2.53       | 249.86   |                              |                                     |
| 13 | 4.9  | 0.89 | 1.57       | 155.3    | LeuHA-LeuHD1                 | 2.74                                |
|    | 0.89 | 4.91 | 0.88       | 87.51    |                              |                                     |
| 14 | 4.57 | 3.21 | 19.68      | 1946.86  | DmaaHA-ProHD                 | 1.81                                |
|    | 3.22 | 4.55 | 17.99      | 1778.93  |                              |                                     |
| 15 | 4.56 | 2.01 | 5.5        | 543.64   | DmaaHA-DmaaNMe <sub>2</sub>  | 2.33                                |
|    | 2.02 | 4.55 | 2.51       | 248.27   |                              |                                     |
| 16 | 4.27 | 1.23 | 0.92       | 91.4     | ProHA-ProHG1                 | 2.81                                |
|    | 1.23 | 4.27 | 0.79       | 77.73    |                              |                                     |
| 17 | 3.22 | 2.53 | 1.84       | 181.7    | ProHA-DmaaHB2                | 2.62                                |
|    | 2.54 | 3.21 | 2.28       | 225.09   |                              |                                     |
| 18 | 3.22 | 2.41 | 2.33       | 230.06   | ProHA-DmaaHB1                | 2.42                                |
|    | 2.39 | 3.21 | 1.09       | 107.76   |                              |                                     |
| 19 | 2.54 | 2.01 | 8.56       | 846.23   | DmaaHB2-DmaaNMe <sub>2</sub> | 2.17                                |
|    | 2.01 | 2.53 | 3.98       | 393.85   |                              |                                     |
| 20 | 2.42 | 2.01 | 3.78       | 373.4    | DmaaHB1-DmaaNMe <sub>2</sub> | 2.33                                |
|    | 2.01 | 2.41 | 3.25       | 321.89   |                              |                                     |
| 21 | 2.56 | 2.39 | 10.55      | 1043.35  | DmaaHB2-DmaaHB1              | 1.80                                |
|    | 2.4  | 2.56 | 9.81       | 970.46   |                              |                                     |

**Table S5.33:** Unintegrated NOESY Cross-peaks for Peptide **30**

LeuNH-AibMe

ProHD-DmaaHB

ProHD-DmaaNMe<sub>2</sub>



**Table S5.34: Peak Assignments for Peptide 32**

| Assignment (splitting)   | Shift (ppm) | Range (ppm) | H's | J's (Hz)          |
|--------------------------|-------------|-------------|-----|-------------------|
| PheNH (d)                | 6.86        | 6.88–6.83   | 1   | 8.55              |
| PheHA (td)               | 4.95        | 4.99–4.92   | 1   | 5.12, 8.28        |
| PheAr (t)                | 7.12        | 7.15–7.09   | 2   | 7.61              |
| PheAr (m)                | 7.03        | 7.04–7.01   | 1   |                   |
| PheAr (d)                | 7.17        | 7.20–7.15   | 2   | 7.14              |
| LeuOMe (d)               | 2.56        | 2.58–2.54   | 6   | 3.65              |
| LeuNH (d)                | 7.79        | 7.82–7.77   | 1   | 8.99              |
| LeuHD2 (d)               | 1.08        | 1.10–1.05   | 3   | 6.48              |
| LeuHD1 (d)               | 0.97        | 0.99–0.95   | 3   | 6.64              |
| LeuHG, DProHG2 (m)       | 1.81        | 1.84–1.78   | 2   |                   |
| LeuHB1 (ddd)             | 1.54        | 1.58–1.50   | 1   | 4.76, 8.82, 13.52 |
| LeuHA (td)               | 5.23        | 5.27–5.20   | 1   | 4.66, 9.28        |
| DProHG1, DProHB1 (m)     | 1.21        | 1.28–1.14   | 2   |                   |
| DProHD2 (m)              | 3.73        | 3.76–3.69   | 1   |                   |
| DProHD1 (d)              | 3.28        | 3.30–3.27   | 1   | 4.43              |
| DProHB2, LeuHB2 (m)      | 1.91        | 1.98–1.82   | 2   |                   |
| DProHB (m)               | 3.23        | 3.26–3.20   | 2   |                   |
| DProHA (dd)              | 3.94        | 3.97–3.92   | 1   | 3.62, 8.01        |
| DmaaNH (d)               | 7.05        | 7.07–7.04   | 0   | 7.78              |
| DmaaNMe <sub>2</sub> (s) | 2.1         | 2.12–2.09   | 6   |                   |
| DmaaHB2 (dd)             | 2.84        | 2.87–2.80   | 1   | 7.99, 12.23       |
| DmaaHB1 (m)              | 2.52        | 2.54–2.48   | 1   |                   |
| DmaaHA (td)              | 4.68        | 4.71–4.64   | 1   | 6.17, 7.83        |
| DmaaBoc (s)              | 1.49        | 1.50–1.47   | 9   |                   |

NOESY (600 MHz, 0.01 M in C<sub>6</sub>D<sub>6</sub>, 24 °C)

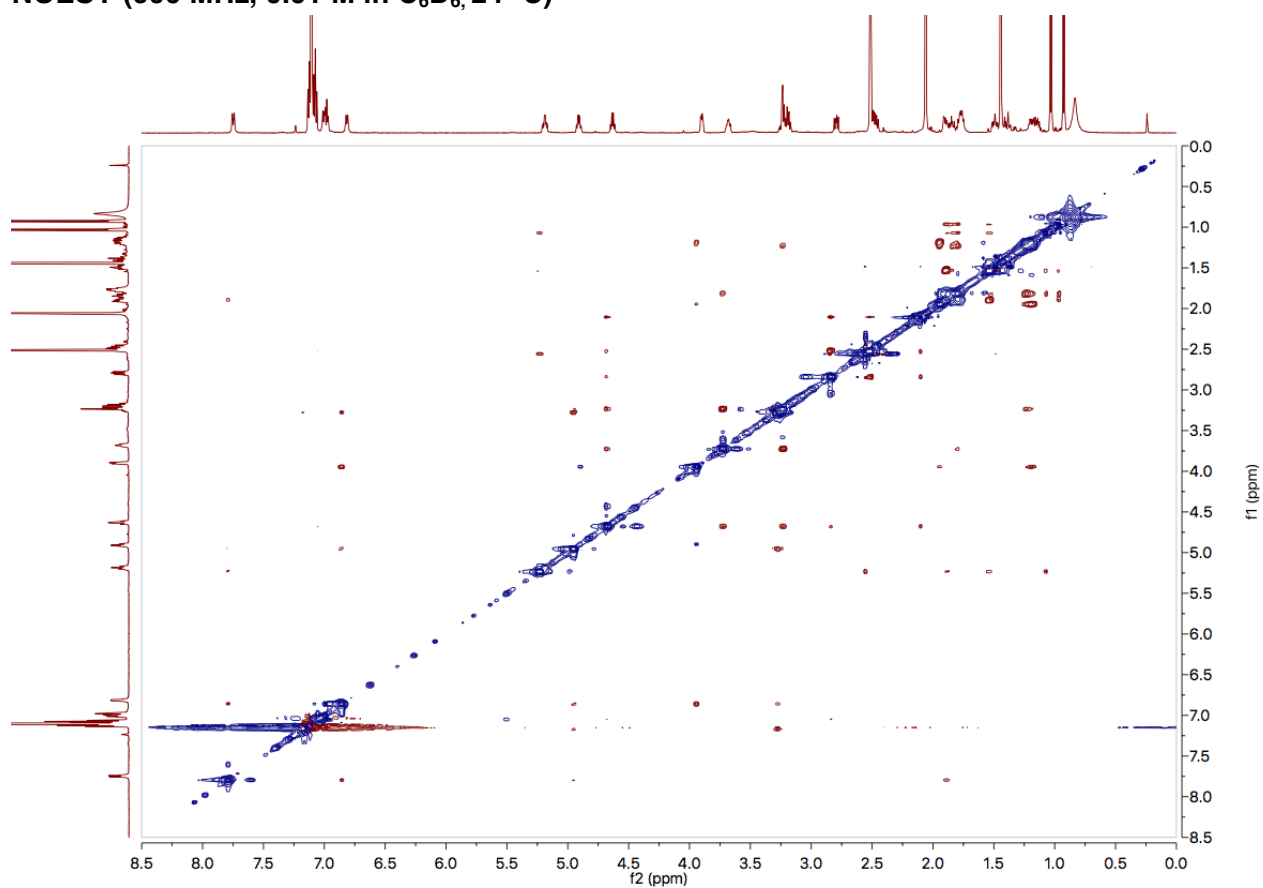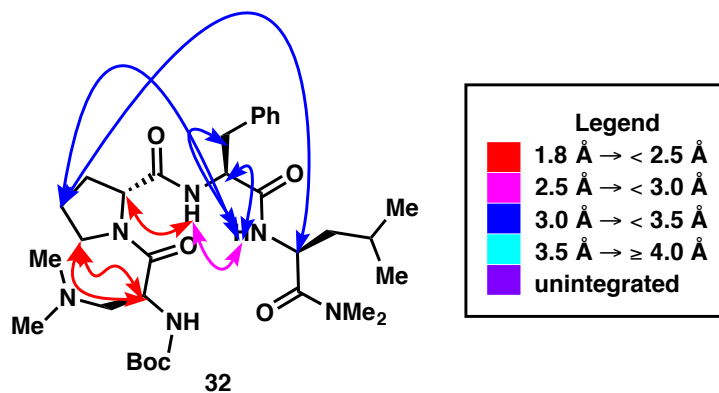

Figure S5.13: Inter-residue nOe Map for Peptide 32



**Table S5.35: Integrated NOESY Cross-peaks for Peptide 32**

|    | f2   | f1   | Normalized | Absolute | Assignment                   | Corrected Distances<br>(Normalized) |
|----|------|------|------------|----------|------------------------------|-------------------------------------|
| 1  | 7.79 | 1.89 | 1.17       | 318.03   | LeuNH-LeuHB2                 | 2.49                                |
|    | 1.9  | 7.78 | 1.53       | 417.27   |                              |                                     |
| 2  | 7.79 | 6.85 | 1          | 272.97   | LeuNH-PheNH                  | 2.56                                |
|    | 6.85 | 7.79 | 1.16       | 317.89   |                              |                                     |
| 3  | 7.79 | 3.27 | 0.25       | 66.96    | LeuNH-PheHB                  | 3.40                                |
|    | 3.26 | 7.8  | 0.29       | 78.1     |                              |                                     |
| 4  | 7.79 | 1.79 | 0.56       | 152.69   | LeuNH-ProHG2                 | 3.01                                |
|    | 1.78 | 7.8  | 0.49       | 133.15   |                              |                                     |
| 5  | 7.79 | 4.96 | 0.47       | 128.32   | LeuNH-PheHA                  | 3.07                                |
|    | 4.93 | 7.79 | 0.41       | 112.62   |                              |                                     |
| 6  | 7.05 | 2.83 | 0.43       | 116.16   | DmaaNH-DmaaHB2               | 3.17                                |
|    | 2.84 | 7.05 | 0.53       | 143.41   |                              |                                     |
| 7  | 7.05 | 2.11 | 0.12       | 31.96    | DmaaNH-DmaaNMe <sub>2</sub>  | 4.36                                |
|    | 2.09 | 7.03 | 0.09       | 23.79    |                              |                                     |
| 8  | 6.85 | 3.95 | 3.25       | 886.36   | PheNH-ProHA                  | 2.18                                |
|    | 3.95 | 6.85 | 3.46       | 944.93   |                              |                                     |
| 9  | 5.23 | 1.08 | 1.04       | 284.38   | LeuHA-LeuHD2                 | 2.74                                |
|    | 1.07 | 5.22 | 1.12       | 306.18   |                              |                                     |
| 10 | 5.23 | 1.89 | 0.44       | 119.16   | LeuHA-LeuHB2                 | 2.83                                |
|    | 1.89 | 5.23 | 0.88       | 239.97   |                              |                                     |
| 11 | 5.23 | 1.54 | 1.14       | 311.02   | LeuHA-LeuHB1                 | 2.50                                |
|    | 1.53 | 5.22 | 1.48       | 405.15   |                              |                                     |
| 12 | 5.23 | 0.96 | 0.3        | 81.15    | LeuHA-LeuHD1                 | 3.41                                |
|    | 0.96 | 5.22 | 0.34       | 91.97    |                              |                                     |
| 13 | 5.23 | 1.8  | 0.43       | 116.82   | LeuHA-ProHG2                 | 3.15                                |
|    | 1.8  | 5.23 | 0.4        | 108.74   |                              |                                     |
| 14 | 4.67 | 3.72 | 1.95       | 533.62   | DmaaHA-ProHD2                | 2.34                                |
|    | 3.72 | 4.67 | 3.21       | 876.95   |                              |                                     |
| 15 | 4.67 | 3.23 | 2.43       | 662.06   | DmaaHA-ProHD1                | 2.28                                |
|    | 3.23 | 4.67 | 3.29       | 898.5    |                              |                                     |
| 16 | 4.66 | 2.11 | 1.6        | 436.42   | DmaaHA-DmaaNMe <sub>2</sub>  | 2.71                                |
|    | 2.1  | 4.68 | 1.45       | 394.97   |                              |                                     |
| 17 | 2.84 | 2.09 | 2.27       | 619.14   | DmaaHB2-DmaaNMe <sub>2</sub> | 2.62                                |
|    | 2.11 | 2.84 | 1.48       | 403.41   |                              |                                     |
| 18 | 3.73 | 3.22 | 15.12      | 4127.81  | ProHD2-ProHD1                | 1.80                                |
|    | 3.23 | 3.73 | 12.39      | 3382.12  |                              |                                     |

**Table S5.36: Unintegrated NOESY Cross-peaks for Peptide 32**

PheNH-PheHB  
LeuHB-LeuHD

# Peptide 33

<sup>1</sup>H-NMR (600 MHz, 0.01 M in C<sub>6</sub>D<sub>6</sub>, 20 °C)

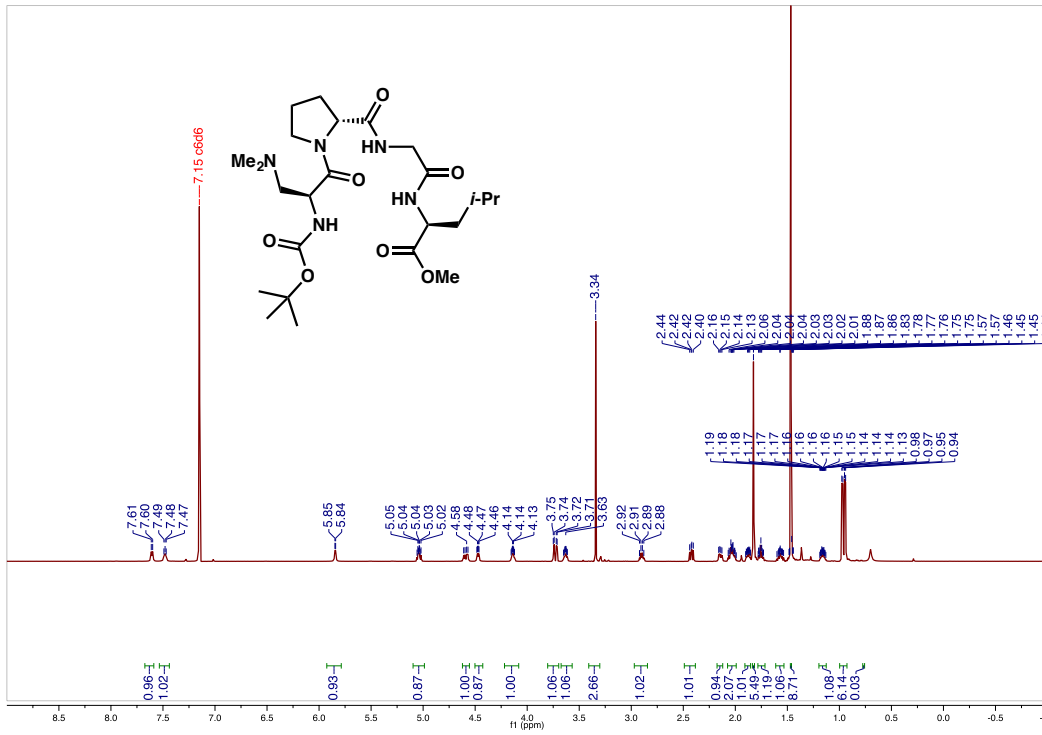

COSY (600 MHz, 0.01 M in C<sub>6</sub>D<sub>6</sub>, 20 °C)

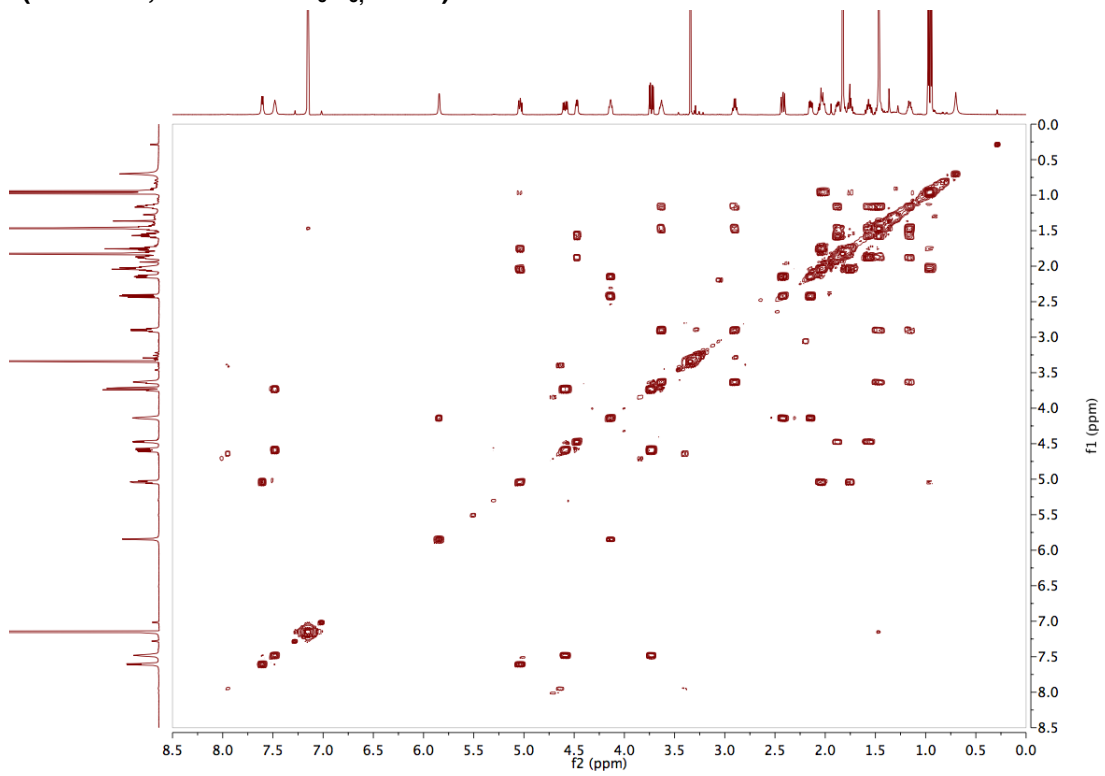

**Table S5.37: Peak Assignments for Peptide 33**

| Assignment (splitting)   | Shift (ppm) | Range (ppm) | H's | J's (Hz)          |
|--------------------------|-------------|-------------|-----|-------------------|
| ProHG2 (m)               | 1.57        | 1.62–1.52   | 1   |                   |
| LeuOMe (s)               | 3.34        | 3.36–3.33   | 3   |                   |
| LeuNH (d)                | 7.61        | 7.63–7.58   | 1   | 7.99              |
| LeuHD (dd)               | 0.96        | 0.99–0.88   | 6   | 6.44, 15.61       |
| LeuHB2, LeuHG (m)        | 2.04        | 2.08–1.99   | 2   |                   |
| LeuHB1 (m)               | 1.76        | 1.82–1.71   | 1   |                   |
| LeuHA (ddd)              | 5.04        | 5.07–5.00   | 1   | 4.65, 7.95, 10.13 |
| GlyNH (t)                | 7.48        | 7.51–7.45   | 1   | 6.47              |
| GlyHA2 (dd)              | 4.59        | 4.63–4.55   | 1   | 7.82, 16.98       |
| GlyHA1 (dd)              | 3.73        | 3.77–3.70   | 1   | 5.11, 16.99       |
| DProHG1 (m)              | 1.16        | 1.20–1.11   | 1   |                   |
| DProHD2 (m)              | 3.63        | 3.67–3.60   | 1   |                   |
| DProHD1 (q)              | 2.9         | 2.94–2.86   | 1   | 8.16              |
| DProHA (dd)              | 4.47        | 4.50–4.43   | 1   | 3.76, 8.71        |
| DmaaNH (d)               | 5.84        | 5.86–5.82   | 1   | 4.06              |
| DmaaHB2 (dd)             | 2.42        | 2.46–2.39   | 1   | 8.70, 12.24       |
| DmaaHB1 (dd)             | 2.14        | 2.18–2.11   | 1   | 6.31, 12.26       |
| DmaaHA (m)               | 4.14        | 4.17–4.11   | 1   |                   |
| DmaaNMe <sub>2</sub> (s) | 1.83        | 1.84–1.81   | 6   |                   |
| DmaaBoc (s)              | 1.47        | 1.48–1.45   | 9   |                   |

NOESY (600 MHz, 0.01 M in C<sub>6</sub>D<sub>6</sub>, 20 °C)

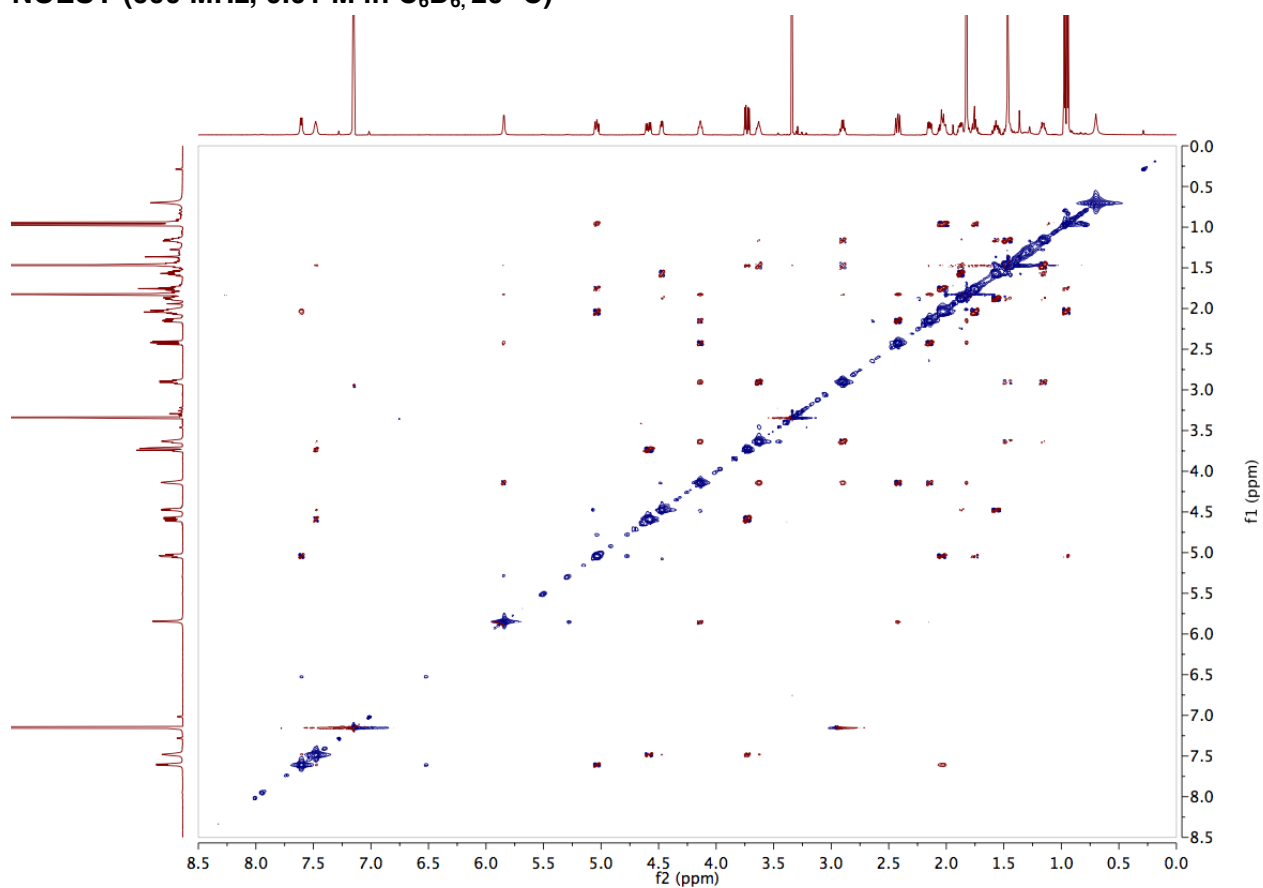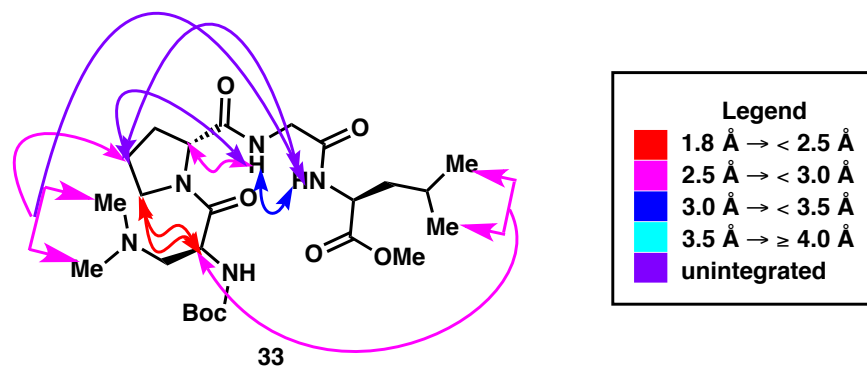

Figure S5.14: Inter-residue nOe Map for Peptide 33

**Table S5.38: Integreated NOESY Cross-peaks for Peptide 33**

|    | f2   | f1   | Normalized | Absolute | Assignment                   | Corrected Distances (Normalized) |
|----|------|------|------------|----------|------------------------------|----------------------------------|
| 1  | 7.6  | 2.04 | 1          | 1875.97  | LeuNH-LeuHB2                 | 2.45                             |
|    | 2.03 | 7.6  | 1.02       | 1906.64  |                              |                                  |
| 2  | 7.6  | 7.47 | 0.14       | 270.75   | LeuNH-GlyNH                  | 3.10                             |
|    | 7.47 | 7.61 | 0.12       | 220.19   |                              |                                  |
| 3  | 7.47 | 4.45 | 0.2        | 378.85   | GlyNH-DProHA                 | 2.89                             |
|    | 4.47 | 7.48 | 0.2        | 370.41   |                              |                                  |
| 4  | 5.84 | 2.42 | 0.36       | 682.81   | DmaaNH-DmaaHB2               | 2.55                             |
|    | 2.41 | 5.85 | 0.49       | 921.09   |                              |                                  |
| 5  | 5.85 | 1.83 | 0.17       | 316.9    | DmaaNH-DmaaNMe <sub>2</sub>  | 3.29                             |
|    | 1.82 | 5.85 | 0.1        | 189.15   |                              |                                  |
| 6  | 5.84 | 2.15 | 0.16       | 299.05   | DmaaNH-DmaaHB1               | 2.95                             |
|    | 2.14 | 5.85 | 0.21       | 385.84   |                              |                                  |
| 7  | 5.02 | 0.95 | 0.89       | 1666.77  | LeuHA-LeuHD                  | 2.73                             |
|    | 0.94 | 5.03 | 0.47       | 874.29   |                              |                                  |
| 8  | 4.13 | 3.63 | 1.54       | 2893.5   | DmaaHA-DProHD2               | 2.14                             |
|    | 3.61 | 4.13 | 1.49       | 2793.84  |                              |                                  |
| 9  | 4.13 | 1.83 | 0.94       | 1761.33  | DmaaHA-LeuHD                 | 2.59                             |
|    | 1.81 | 4.13 | 0.39       | 740.04   |                              |                                  |
| 10 | 4.13 | 2.9  | 1.11       | 2088.43  | DmaaHA-DProHD1               | 2.26                             |
|    | 2.89 | 4.14 | 1          | 1879.38  |                              |                                  |
| 11 | 2.41 | 1.83 | 1.29       | 2415.41  | DmaaHB2-DmaaNMe <sub>2</sub> | 2.45                             |
|    | 1.82 | 2.42 | 0.5        | 941.24   |                              |                                  |
| 12 | 2.14 | 1.83 | 1.09       | 2041.52  | DmaaHB1-DmaaNMe <sub>2</sub> | 2.52                             |
|    | 1.82 | 2.16 | 0.45       | 847.67   |                              |                                  |
| 13 | 1.74 | 0.96 | 0.76       | 1420.35  | LeuHB1-LeuHD                 | 2.74                             |
|    | 0.95 | 1.75 | 0.48       | 899.02   |                              |                                  |
| 14 | 1.56 | 1.16 | 0.55       | 1029.22  | DProHG1-DmaaNMe <sub>2</sub> | 2.51                             |
|    | 1.15 | 1.57 | 0.66       | 1240.01  |                              |                                  |
| 15 | 3.63 | 2.9  | 4.17       | 7818.57  | DProHD1-DProHD2              | 1.80                             |
|    | 2.9  | 3.63 | 3.69       | 6930.23  |                              |                                  |

**Table S5.39: Unintegrated NOESY Cross-peaks for Peptide 33**

LeuNH-DmaaNMe<sub>2</sub>  
 LeuNH-DProHG  
 GlyNH-DProHG  
 DmaaHA-DmaaNMe<sub>2</sub>

### C. Calculation of $\phi$ Dihedral Angle From $^3J_{\text{NH-H}\alpha}$ Value

$^3J$ -Values ( $^3J_{\text{NH-H}\alpha}$ ) from  $^1\text{H-NMR}$  spectra were extracted from the  $\text{NH(Dmaa)}$  and  $\text{NH(Leu)}$  resonances and used to solve for the  $\phi$  angles of the two respective residues. The aforementioned dihedrals were solved for using equation S3,<sup>31</sup> which is derived from the studies pioneered by Karplus and co-workers.<sup>32,33</sup> Solutions were found by plotting equation S3 against the extracted  $^3J$ -values and finding their intersection using an online graphing program.<sup>34</sup> Table S5.40 shows all angles calculated from the  $^3J$ -value of each peptide. Those angles in parentheses were eliminated from the realm of possibilities because of their being Ramachandran disallowed on the basis of their positions in Figures S4.04 and S4.05. Resonances with  $^3J = 0$  (listed at “undetermined” in Table S5.40) were assigned values of  $\phi = -30^\circ$ . Informed by our own observations in the solid state and examination of models, pre-helical (type I')  $\beta$ -turns often adopt  $\phi(i)$  and  $\phi(i+3)$  at approximately  $-30^\circ$  to  $-90^\circ$  and  $-30^\circ$  to  $-120^\circ$ , respectively. These metrics appear to optimize H-bond directionality and minimize repulsive steric and stereoelectronic interactions within the turn. The same issues often mandate  $\phi(i)$  and  $\phi(i+3)$  for (type II')  $\beta$ -hairpins to be close to  $-90^\circ$  to  $-150^\circ$  and  $-90^\circ$  to  $-120^\circ$ , respectively. Non-hairpin  $\beta$ -turns were observed to have  $\phi(i)$  values of approximately  $-60^\circ$  to  $-160^\circ$  and  $\phi(i+3)$  values of  $-60^\circ$  to  $-150^\circ$ . These estimations of dihedral angles informed the overall assignment of turn-type. These cutoffs are graphically represented in Figure S5.15.

$$J = 6.98 \cos^2\left(\phi - \frac{\pi}{3}\right) - 1.38 \cos\left(\phi - \frac{\pi}{3}\right) + 1.72 \quad (\text{S3})$$

**Table S5.40:** Peptide  $^3J_{\text{NH-H}\alpha}$ -Values and Calculated  $\phi$  Angles

| Peptide | $J_i$ | $\phi(i)$ (eliminated values)                     | $J_{i+3}$ | $\phi(i+3)$             |
|---------|-------|---------------------------------------------------|-----------|-------------------------|
| 3       | 7.6   | $-86^\circ, -154^\circ$                           | 8.7       | $-95^\circ, -145^\circ$ |
| 4       | 0.0   | undetermined                                      | 7.8       | $-89^\circ, -151^\circ$ |
| 7       | 0.0   | undetermined                                      | 6.0       | $-74^\circ, -166^\circ$ |
| 15      | 7.6   | $-86^\circ, -154^\circ$                           | 7.9       | $-89^\circ, -142^\circ$ |
| 16      | 0.0   | undetermined                                      | 8.9       | $-96^\circ, -143^\circ$ |
| 17      | 0.0   | undetermined                                      | 7.8       | $-89^\circ, -151^\circ$ |
| 18      | 4.6   | $-63^\circ, -177^\circ$ ( $19^\circ, 102^\circ$ ) | 8.0       | $-89^\circ, -151^\circ$ |
| 19      | 3.9   | $-89^\circ, -142^\circ$ ( $12^\circ, 108^\circ$ ) | 7.8       | $-89^\circ, -151^\circ$ |
| 21      | 7.1   | $-82^\circ, -158^\circ$ ( $49^\circ, 71^\circ$ )  | 7.9       | $-89^\circ, -142^\circ$ |
| 22      | 5.2   | $-67^\circ, -172^\circ$ ( $24^\circ, 95^\circ$ )  | 8.2       | $-90^\circ, -150^\circ$ |
| 25      | 5.2   | $-67^\circ, -172^\circ$ ( $24^\circ, 95^\circ$ )  | 8.3       | $-94^\circ, -151^\circ$ |
| 30      | 7.4   | $-89^\circ, -151^\circ$                           | 8.0       | $-89^\circ, -151^\circ$ |
| 32      | 7.9   | $-89^\circ, -142^\circ$                           | 9.0       | $-98^\circ, -142^\circ$ |
| 33      | 4.1   | $-119^\circ, 180^\circ$ ( $14^\circ, 106^\circ$ ) | 8.0       | $-89^\circ, -151^\circ$ |

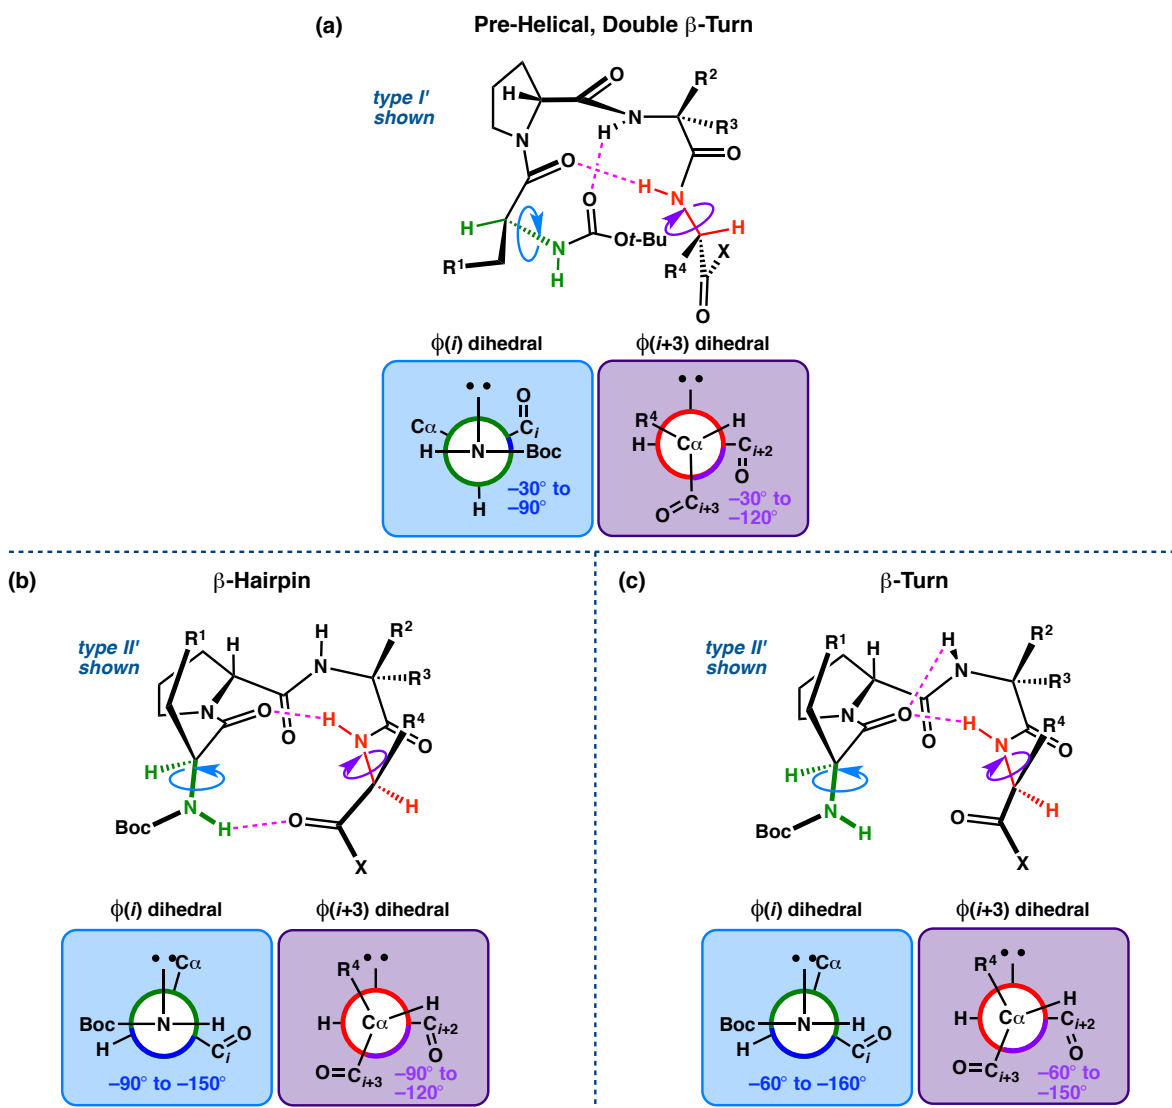

**Figure S5.15:** Explanation for the predicted  $\phi(i)$  and  $\phi(i+3)$  dihedrals of (a) pre-helical, double  $\beta$ -turns, (b)  $\beta$ -hairpins, and (c) non-hairpin  $\beta$ -turns (which may sample  $\gamma/\gamma'$ -turns).

## D. Relative Chemical Shift Data & <sup>1</sup>H-NMR Overlays of Homologous Series

**Table S5.41:** Chemical Shift Values for Peptide Amide Protons

| Peptide | NH( <i>i</i> +3) (ppm) | NH( <i>i</i> +2) (ppm) | NH(Dmaa) (ppm) |
|---------|------------------------|------------------------|----------------|
| 3       | 8.07                   | 6.69                   | 7.10           |
| 4       | 7.93                   | 7.67                   | 5.82           |
| 7       | 8.09                   | 7.71                   | 5.71           |
| 15      | 7.77                   | 7.48                   | 5.48           |
| 16      | 7.57                   | 7.06                   | 6.73           |
| 17      | 7.49                   | 7.58                   | 5.75           |
| 18      | 7.60                   | 7.04                   | 5.80           |
| 19      | 7.66                   | 7.23                   | 5.77           |
| 21      | 7.85                   | 6.97                   | 5.48           |
| 22      | 7.52                   | 6.86                   | 5.84           |
| 25      | 7.51                   | 6.95                   | 5.87           |
| 30      | 7.56                   | 6.93                   | 5.50           |
| 32      | 7.79                   | 6.86                   | 7.05           |
| 33      | 7.61                   | 7.48                   | 5.84           |

**Table S5.42:** Relative Chemical Shift Values for Peptide Amide Protons\*

| Peptide | NH( <i>i</i> +3) (ppm) | NH( <i>i</i> +2) (ppm) | NH(Dmaa) (ppm) |
|---------|------------------------|------------------------|----------------|
| 3       | 8.07                   | 6.69                   | 7.10           |
| 4       | 0.14                   | -0.98                  | 1.28           |
| 7       | -0.02                  | -1.02                  | 1.39           |
| 15      | 0.3                    | -0.79                  | 1.62           |
| 16      | 0.50                   | -0.37                  | 0.37           |
| 17      | 0.58                   | -0.89                  | 1.35           |
| 18      | 0.47                   | -0.35                  | 1.30           |
| 19      | 0.41                   | -0.54                  | 1.33           |
| 21      | 0.22                   | -0.28                  | 1.62           |
| 22      | 0.55                   | -0.17                  | 1.26           |
| 25      | 0.56                   | -0.26                  | 1.23           |
| 30      | 0.51                   | -0.24                  | 1.60           |
| 32      | 0.28                   | -0.17                  | 0.05           |
| 33      | 0.46                   | -0.79                  | 1.26           |

\*Values shown are  $\Delta\delta$  of NH(Leu), NH(*i*+2), and NH(Dmaa) relative to those in peptide 3.

**Table S5.43:** Peak Width at Half-Maximum Intensity for Peptide Amide Protons

| Peptide | NH( <i>i</i> +3) (ppm) | NH( <i>i</i> +2) (ppm) | NH(Dmaa) (ppm) |
|---------|------------------------|------------------------|----------------|
| 3       | 0.025                  | 0.015                  | 0.025          |
| 4       | 0.019                  | 0.013                  | 0.031          |
| 7       | 0.024                  | 0.012                  | 0.016          |
| 15      | 0.019                  | 0.010                  | 0.024          |
| 16      | 0.020                  | 0.014                  | 0.024          |
| 17      | 0.020                  | 0.011                  | 0.020          |
| 18      | 0.020                  | 0.011                  | 0.013          |
| 19      | 0.019                  | 0.009                  | 0.012          |
| 21      | 0.021                  | obstructed             | 0.020          |
| 22      | 0.019                  | 0.013                  | 0.016          |
| 25      | 0.018                  | 0.010                  | 0.014          |
| 30      | 0.021                  | 0.009                  | 0.021          |
| 32      | 0.023                  | 0.023                  | obstructed     |
| 33      | 0.022                  | 0.028                  | 0.014          |



## *i*+2 Series

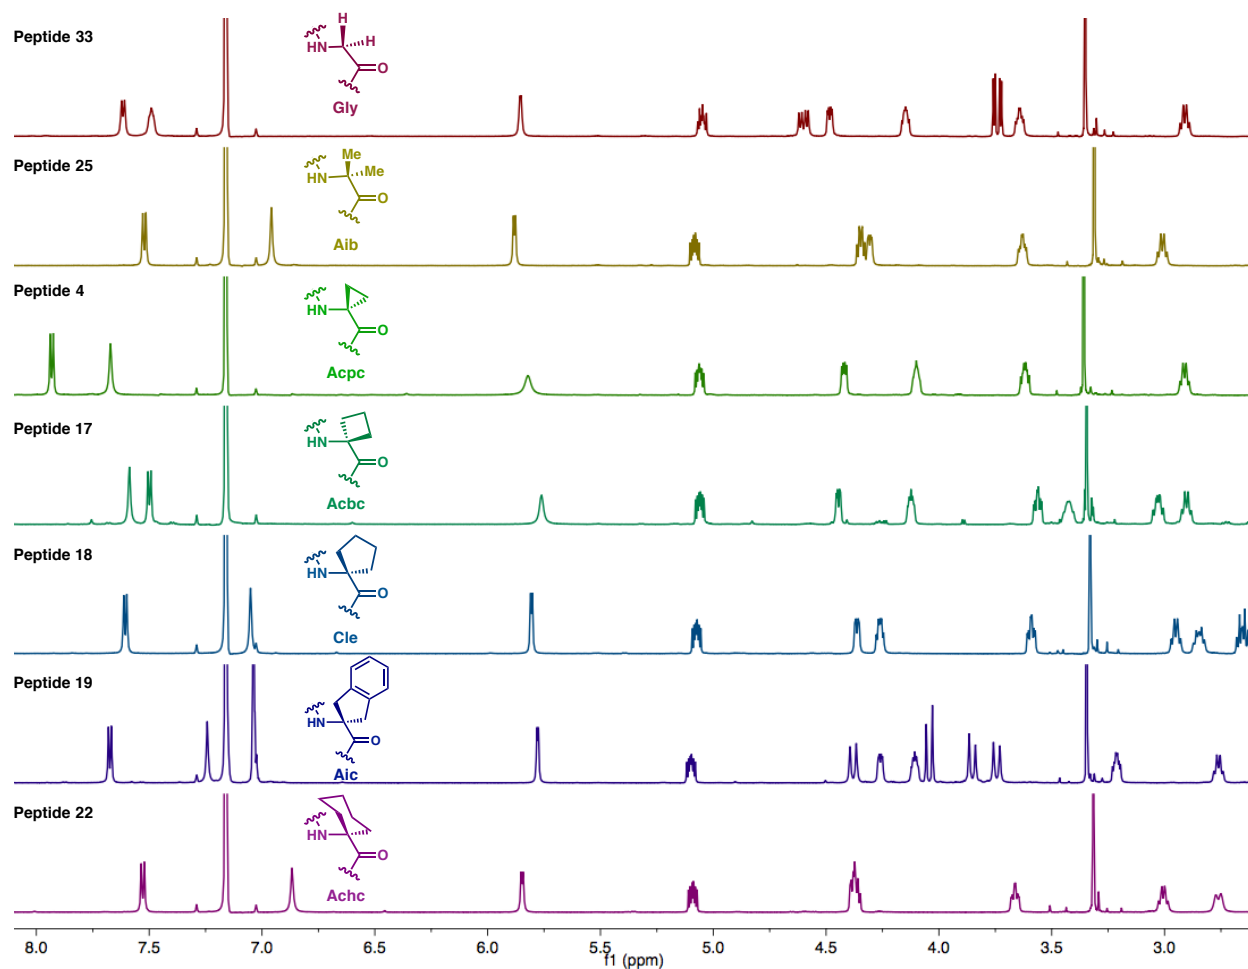

**Figure S5.16:** Stacked <sup>1</sup>H-NMR spectra (600 MHz, 0.01 M in C<sub>6</sub>D<sub>6</sub>, 20 °C) of a homologous series of peptides differing only in the *i*+2 residue (Boc-Dmaa-D-Pro-Xaa-Leu-OMe).

## L-Pro Series

Peptide 15

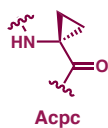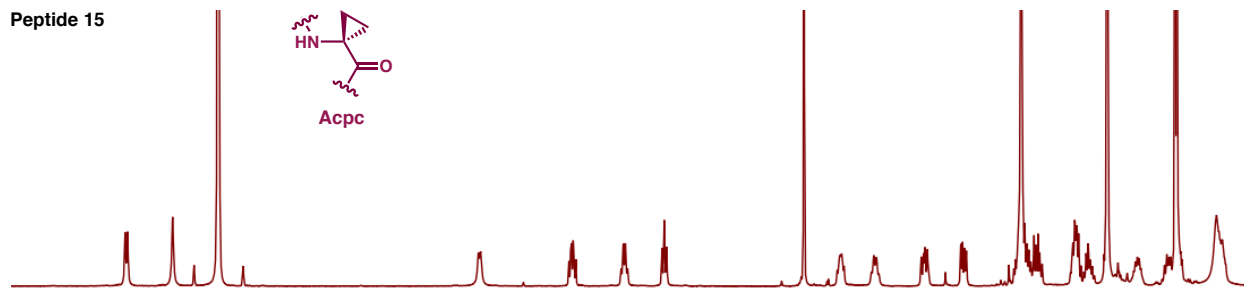

Peptide 30

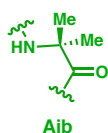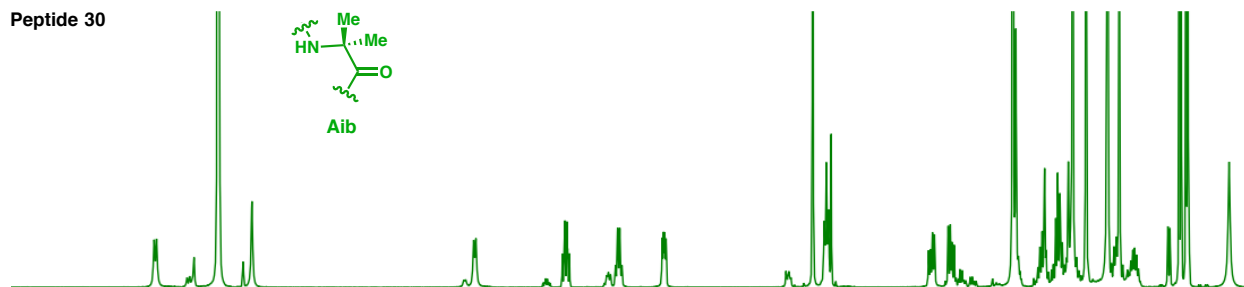

Peptide 21

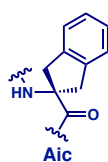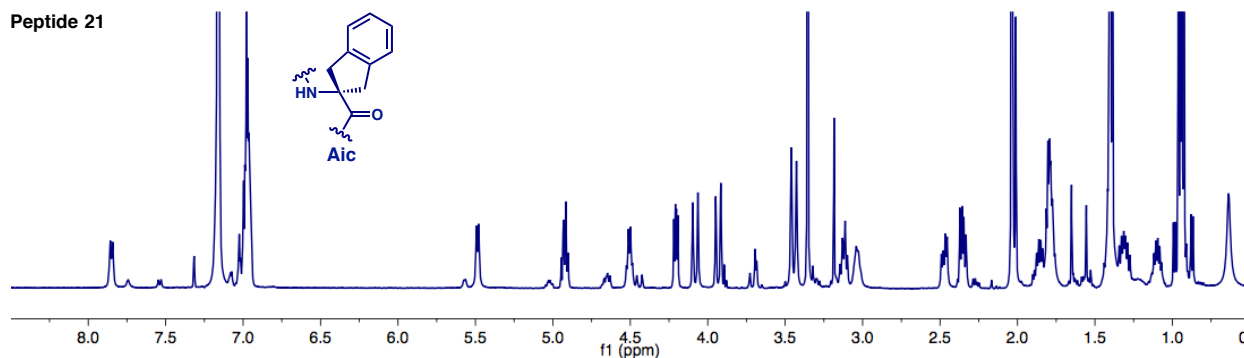

**Figure S5.17:** Stacked <sup>1</sup>H-NMR spectra (600 MHz, 0.01 M in C<sub>6</sub>D<sub>6</sub>, 20 °C) of a homologous series of L-Pro-containing peptides differing only in the *i*+2 residue (Boc-Dmaa-Pro-Xaa-Leu-OMe).

## VI. DFT Geometry Optimizations of X-Ray Crystal Structures

### A. Computational Methods

All *ab initio* computations were performed using Gaussian 09, Revision D.01,<sup>35</sup> which was accessed remotely on OMEGA, a supercomputer cluster owned and operated by the Yale University Faculty of Arts and Sciences High Performance Computing Center.<sup>36</sup> Job files were created locally using GaussView 5.0<sup>37</sup> and transferred to the clusters using a secure file-transfer protocol (SFTP). All jobs reported herein used one node (8 cores) and 32 GB of memory. Computational outputs were rendered using Mercury 3.8 by conversion of the Gaussian output file (.out) to a Protein Data Bank file (.pdb).<sup>16</sup>

Geometry optimization of X-ray crystal structures was accomplished using Density Functional Theory (DFT) at the M06-2X/6-311++G(2d,3p)//B3LYP/6-31+G(d,p) level of theory.<sup>38,39</sup> In most cases, the number of optimization steps was increased to 50 by specifying “opt=(maxcycles=50)” in the route card of the Gaussian job file (.gjf). All such calculations were performed for isolated, gas-phase molecules at 25 °C (298.15 K) and 1 atm. Vibrational corrections to the total electronic energy were computed using frequency calculations at the B3LYP/6-31+G(d,p) level and were used to derive enthalpy (*H*), entropy (*S*), and Gibbs free energy (*G*) values. The conversion factor of 627.509 kcal/mol per Hartree/particle was used to calculate relative energy values in kcal/mol. Dipole moments from the M06-2X single-point calculations are reported in Debye (D). Overlays of the DFT-optimized structures with the corresponding X-ray crystallographic coordinates were generated using either the “structure overlay” or “molecule overlay” features of Mercury 3.8, both of which provide an RMSD value (in Å) to quantify the fit. The “structure overlay” feature was used to generate backbone and loop region RMSD values, while the “molecule overlay feature was used to generate all-atom RMSDs. Please refer to Section III.A for additional details on structure overlays.

We note that a known DFT optimization protocol for organic X-ray crystal structures has been reported previously.<sup>40</sup> This comprehensive study employed a dispersion corrected functional, B97D3. In a number of cases, we attempted geometry optimizations of our peptide X-ray crystal structures using the D3 dispersion correction,<sup>41</sup> but the resulting structures differed significantly from the X-ray coordinates seemed improbable/unlikely. As such, we continued to use the M06-2X/6-311++G(2d,3p)//B3LYP/6-31+G(d,p) method, which provided structures in good accordance with chemical intuition and previous studies.

## B. Optimization of Peptides 3a–c

**Table S6.01:** B3LYP/6-31+G(d,p) Optimized Coordinates of 3a

| Tag | Symbol | X         | Y         | Z         | Tag | Symbol | X         | Y         | Z         |
|-----|--------|-----------|-----------|-----------|-----|--------|-----------|-----------|-----------|
| 1   | O      | 0.029438  | -1.784969 | 0.832165  | 63  | H      | 6.24365   | -0.521656 | 0.013127  |
| 2   | O      | -4.56702  | -0.10373  | 1.544639  | 64  | C      | -2.330324 | -2.748536 | -0.371941 |
| 3   | O      | -1.5331   | 2.912301  | 1.053915  | 65  | H      | -1.963061 | -3.696002 | 0.045538  |
| 4   | O      | -0.721522 | 0.55778   | -1.884541 | 66  | H      | -1.581456 | -2.424249 | -1.101135 |
| 5   | O      | 4.271011  | 0.73468   | -0.665338 | 67  | C      | -3.677856 | -2.993133 | -1.07891  |
| 6   | O      | 3.748299  | -0.408295 | 1.258207  | 68  | H      | -4.065071 | -2.019999 | -1.411846 |
| 7   | N      | -0.986844 | -1.434083 | 2.834271  | 69  | C      | -4.728559 | -3.630019 | -0.154105 |
| 8   | N      | -2.695005 | -0.372736 | 0.266245  | 70  | H      | -4.370451 | -4.59096  | 0.238579  |
| 9   | H      | -2.070269 | 0.022668  | -0.434845 | 71  | H      | -5.658138 | -3.823566 | -0.701226 |
| 10  | N      | -2.887966 | 2.267335  | -0.675164 | 72  | H      | -4.979697 | -2.985408 | 0.693837  |
| 11  | H      | -2.850089 | 1.983126  | -1.646407 | 73  | C      | -3.46003  | -3.861417 | -2.32874  |
| 12  | N      | 0.506421  | 2.308973  | -1.163191 | 74  | H      | -2.748946 | -3.396266 | -3.02054  |
| 13  | N      | 2.160147  | -0.072469 | -0.264597 | 75  | H      | -4.400747 | -4.019028 | -2.868271 |
| 14  | H      | 1.614578  | -0.701388 | 0.324067  | 76  | H      | -3.064787 | -4.848693 | -2.056729 |
| 15  | N      | 2.607091  | -1.960668 | -2.535177 | 77  | C      | 1.399265  | -1.155719 | -2.371585 |
| 16  | C      | -2.123957 | -1.061794 | 3.67619   | 78  | H      | 0.671726  | -1.733173 | -1.797058 |
| 17  | H      | -1.911546 | -0.101546 | 4.161083  | 79  | H      | 0.928007  | -0.914043 | -3.342736 |
| 18  | H      | -2.275873 | -1.81629  | 4.45784   | 80  | C      | 3.518036  | -1.425852 | -3.541777 |
| 19  | H      | -3.042056 | -0.94387  | 3.104984  | 81  | H      | 3.055317  | -1.371472 | -4.548216 |
| 20  | C      | 0.308246  | -1.387367 | 3.510797  | 82  | H      | 4.402384  | -2.066794 | -3.609472 |
| 21  | H      | 1.057771  | -1.890679 | 2.902793  | 83  | H      | 3.862647  | -0.427927 | -3.25939  |
| 22  | H      | 0.220532  | -1.885787 | 4.481643  | 84  | C      | 2.281857  | -3.35659  | -2.806879 |
| 23  | H      | 0.624049  | -0.349472 | 3.676438  | 85  | H      | 1.661592  | -3.756812 | -1.999617 |
| 24  | C      | -1.01406  | -1.645337 | 1.490869  | 86  | H      | 3.203888  | -3.945185 | -2.851769 |
| 25  | C      | -2.376872 | -1.712443 | 0.765181  | 87  | H      | 1.740586  | -3.497696 | -3.76404  |
| 26  | H      | -3.172294 | -1.974354 | 1.459936  |     |        |           |           |           |
| 27  | C      | -3.759635 | 0.338819  | 0.718783  |     |        |           |           |           |
| 28  | C      | -3.942047 | 1.727437  | 0.139418  |     |        |           |           |           |
| 29  | C      | -5.366885 | 2.105158  | -0.250394 |     |        |           |           |           |
| 30  | H      | -5.474372 | 2.723828  | -1.13637  |     |        |           |           |           |
| 31  | H      | -6.119201 | 1.335901  | -0.11331  |     |        |           |           |           |
| 32  | C      | -4.745481 | 2.703915  | 0.972491  |     |        |           |           |           |
| 33  | H      | -5.07409  | 2.337366  | 1.938044  |     |        |           |           |           |
| 34  | H      | -4.415255 | 3.735911  | 0.938624  |     |        |           |           |           |
| 35  | C      | -1.728881 | 2.77303   | -0.147634 |     |        |           |           |           |
| 36  | C      | -0.673465 | 3.199526  | -1.192037 |     |        |           |           |           |
| 37  | H      | -1.109117 | 3.155611  | -2.197424 |     |        |           |           |           |
| 38  | C      | -0.093029 | 4.596398  | -0.877394 |     |        |           |           |           |
| 39  | H      | -0.590946 | 5.377838  | -1.457536 |     |        |           |           |           |
| 40  | H      | -0.242803 | 4.804727  | 0.185966  |     |        |           |           |           |
| 41  | C      | 1.409131  | 4.471655  | -1.185132 |     |        |           |           |           |
| 42  | H      | 1.60123   | 4.597806  | -2.257129 |     |        |           |           |           |
| 43  | H      | 2.012602  | 5.205743  | -0.644203 |     |        |           |           |           |
| 44  | C      | 1.726002  | 3.034311  | -0.7637   |     |        |           |           |           |
| 45  | H      | 2.614003  | 2.619146  | -1.240635 |     |        |           |           |           |
| 46  | H      | 1.859813  | 2.959722  | 0.322358  |     |        |           |           |           |
| 47  | C      | 0.388307  | 1.020505  | -1.563095 |     |        |           |           |           |
| 48  | C      | 1.665642  | 0.158488  | -1.612841 |     |        |           |           |           |
| 49  | H      | 2.444144  | 0.726977  | -2.12799  |     |        |           |           |           |
| 50  | C      | 3.473435  | 0.12539   | 0.042316  |     |        |           |           |           |
| 51  | C      | 5.093193  | -0.318186 | 1.852864  |     |        |           |           |           |
| 52  | C      | 4.916982  | -1.059411 | 3.181571  |     |        |           |           |           |
| 53  | H      | 4.158997  | -0.568639 | 3.799857  |     |        |           |           |           |
| 54  | H      | 5.862012  | -1.068894 | 3.733577  |     |        |           |           |           |
| 55  | H      | 4.605706  | -2.093722 | 3.006863  |     |        |           |           |           |
| 56  | C      | 5.466605  | 1.148243  | 2.097761  |     |        |           |           |           |
| 57  | H      | 5.586362  | 1.686854  | 1.156763  |     |        |           |           |           |
| 58  | H      | 6.409249  | 1.196781  | 2.653803  |     |        |           |           |           |
| 59  | H      | 4.694171  | 1.642552  | 2.696497  |     |        |           |           |           |
| 60  | C      | 6.113579  | -1.038799 | 0.964469  |     |        |           |           |           |
| 61  | H      | 5.786843  | -2.064915 | 0.767637  |     |        |           |           |           |
| 62  | H      | 7.079448  | -1.080318 | 1.479685  |     |        |           |           |           |

### Calculation Type = FREQ

Calculation Method = RB3LYP

Basis Set = 6-31+G(d,p)

Charge = 0

Spin = Singlet

E(RB3LYP) = -1837.84334428 a.u.

RMS Gradient Norm = 0.00000293 a.u.

Imaginary Freq = 0

Dipole Moment = 1.7153 Debye

Point Group = C1

Job cpu time: 6 days 10 hours 30 minutes 38.3 seconds.

### Calculation Type = SP

Calculation Method = RM062X

Basis Set = 6-311++G(2d,3p)

Charge = 0

Spin = Singlet

E(RM062X) = -1837.54604149 a.u.

Dipole Moment = 1.6990 Debye

Point Group = C1

Job cpu time: 1 days 12 hours 32 minutes 6.3 seconds.

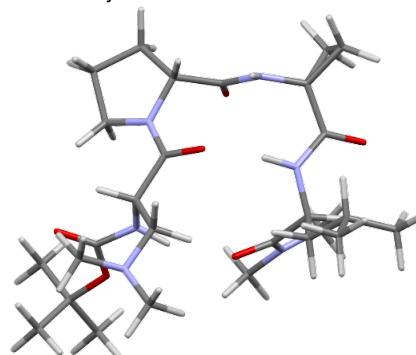

**Table S6.02: B3LYP/6-31+G(d,p)-Optimized Coordinates of 3b**

| Tag | Symbol | X         | Y         | Z         | Tag | Symbol | X         | Y         | Z        |
|-----|--------|-----------|-----------|-----------|-----|--------|-----------|-----------|----------|
| 1   | O      | 0.246215  | -2.076974 | 0.191209  | 64  | C      | -1.776145 | 0.197775  | 2.762992 |
| 2   | O      | 4.506326  | -0.283624 | -1.402201 | 65  | H      | -2.542264 | -0.580967 | 2.922764 |
| 3   | O      | 0.998948  | 2.354698  | -2.160804 | 66  | H      | -0.79601  | -0.277858 | 2.841639 |
| 4   | O      | 0.434484  | 1.299448  | 1.364685  | 67  | C      | -1.03424  | 1.047104  | 4.921498 |
| 5   | O      | -4.239225 | 0.271559  | -0.216557 | 68  | H      | -1.346177 | 0.161175  | 5.509062 |
| 6   | O      | -3.226338 | -1.600372 | -1.077623 | 69  | H      | -1.081179 | 1.920097  | 5.58122  |
| 7   | N      | 1.39228   | -2.706186 | -1.669017 | 70  | H      | 0.005296  | 0.910117  | 4.61151  |
| 8   | N      | 2.660041  | -0.140526 | -0.066484 | 71  | C      | -3.248031 | 1.572786  | 4.122673 |
| 9   | H      | 1.940017  | 0.447027  | 0.353382  | 72  | H      | -3.855105 | 1.763312  | 3.232943 |
| 10  | N      | 2.518023  | 2.642492  | -0.469249 | 73  | H      | -3.278062 | 2.470604  | 4.748558 |
| 11  | H      | 2.577805  | 2.84011   | 0.521557  | 74  | H      | -3.722573 | 0.743877  | 4.683921 |
| 12  | N      | -0.891965 | 2.6775    | 0.167852  | 75  | C      | 2.605102  | -1.823392 | 1.738577 |
| 13  | N      | -2.094591 | -0.314306 | 0.350851  | 76  | H      | 3.480937  | -1.300393 | 2.145606 |
| 14  | H      | -1.351236 | -1.004912 | 0.23239   | 77  | H      | 1.714532  | -1.351326 | 2.164905 |
| 15  | N      | -1.868828 | 1.277509  | 3.748029  | 78  | C      | 2.654268  | -3.303895 | 2.166831 |
| 16  | C      | 2.574951  | -2.757001 | -2.528945 | 79  | H      | 1.809715  | -3.821993 | 1.692252 |
| 17  | H      | 3.377778  | -2.118481 | -2.165823 | 80  | C      | 2.463967  | -3.41275  | 3.688287 |
| 18  | H      | 2.298423  | -2.400761 | -3.527624 | 81  | H      | 3.271259  | -2.895572 | 4.222874 |
| 19  | H      | 2.936087  | -3.789393 | -2.623159 | 82  | H      | 2.468385  | -4.459425 | 4.012804 |
| 20  | C      | 0.180829  | -3.257719 | -2.271572 | 83  | H      | 1.514069  | -2.966655 | 4.002538 |
| 21  | H      | -0.614744 | -3.282834 | -1.530126 | 84  | C      | 3.955477  | -4.002417 | 1.737385 |
| 22  | H      | 0.384373  | -4.270534 | -2.638018 | 85  | H      | 4.092811  | -4.003404 | 0.650799 |
| 23  | H      | -0.138559 | -2.638047 | -3.1186   | 86  | H      | 3.962433  | -5.047394 | 2.067434 |
| 24  | C      | 1.318386  | -2.147843 | -0.430718 | 87  | H      | 4.82882   | -3.507579 | 2.181183 |
| 25  | C      | 2.599399  | -1.575563 | 0.2203    |     |        |           |           |          |
| 26  | H      | 3.49527   | -2.006608 | -0.221607 |     |        |           |           |          |
| 27  | C      | 3.62058   | 0.39301   | -0.863994 |     |        |           |           |          |
| 28  | C      | 3.594998  | 1.895708  | -1.057488 |     |        |           |           |          |
| 29  | C      | 4.959186  | 2.578778  | -1.086105 |     |        |           |           |          |
| 30  | H      | 5.010565  | 3.561974  | -0.62815  |     |        |           |           |          |
| 31  | H      | 5.817316  | 1.933466  | -0.933396 |     |        |           |           |          |
| 32  | C      | 4.179836  | 2.419247  | -2.353224 |     |        |           |           |          |
| 33  | H      | 4.509886  | 1.664538  | -3.057804 |     |        |           |           |          |
| 34  | H      | 3.686195  | 3.28539   | -2.778672 |     |        |           |           |          |
| 35  | C      | 1.278485  | 2.768727  | -1.042091 |     |        |           |           |          |
| 36  | C      | 0.254176  | 3.53546   | -0.179209 |     |        |           |           |          |
| 37  | H      | 0.735435  | 3.875346  | 0.744616  |     |        |           |           |          |
| 38  | C      | -0.393108 | 4.706228  | -0.95285  |     |        |           |           |          |
| 39  | H      | 0.27028   | 5.104735  | -1.724055 |     |        |           |           |          |
| 40  | H      | -0.623701 | 5.515538  | -0.250957 |     |        |           |           |          |
| 41  | C      | -1.686713 | 4.105299  | -1.52921  |     |        |           |           |          |
| 42  | H      | -2.438423 | 4.863219  | -1.766888 |     |        |           |           |          |
| 43  | H      | -1.457556 | 3.539157  | -2.435834 |     |        |           |           |          |
| 44  | C      | -2.159434 | 3.152569  | -0.425816 |     |        |           |           |          |
| 45  | H      | -2.751775 | 3.684102  | 0.331639  |     |        |           |           |          |
| 46  | H      | -2.755161 | 2.320437  | -0.802667 |     |        |           |           |          |
| 47  | C      | -0.703682 | 1.603251  | 0.966546  |     |        |           |           |          |
| 48  | C      | -1.931186 | 0.747159  | 1.334917  |     |        |           |           |          |
| 49  | H      | -2.836911 | 1.351785  | 1.281506  |     |        |           |           |          |
| 50  | C      | -3.275427 | -0.485377 | -0.306497 |     |        |           |           |          |
| 51  | C      | -4.384087 | -2.018536 | -1.889315 |     |        |           |           |          |
| 52  | C      | -5.584722 | -2.320163 | -0.984861 |     |        |           |           |          |
| 53  | H      | -5.30616  | -3.047106 | -0.214829 |     |        |           |           |          |
| 54  | H      | -6.392076 | -2.753783 | -1.585085 |     |        |           |           |          |
| 55  | H      | -5.953486 | -1.414748 | -0.501478 |     |        |           |           |          |
| 56  | C      | -4.702223 | -0.954004 | -2.945605 |     |        |           |           |          |
| 57  | H      | -5.067394 | -0.036095 | -2.483385 |     |        |           |           |          |
| 58  | H      | -5.470376 | -1.334801 | -3.627552 |     |        |           |           |          |
| 59  | H      | -3.808421 | -0.724405 | -3.535166 |     |        |           |           |          |
| 60  | C      | -3.877947 | -3.302124 | -2.553658 |     |        |           |           |          |
| 61  | H      | -3.000018 | -3.09656  | -3.173336 |     |        |           |           |          |
| 62  | H      | -4.660175 | -3.726202 | -3.190971 |     |        |           |           |          |
| 63  | H      | -3.604314 | -4.045327 | -1.798546 |     |        |           |           |          |

**Calculation Type = FREQ**  
Calculation Method = RB3LYP  
Basis Set = 6-31+G(d,p)  
Charge = 0  
Spin = Singlet  
E(RB3LYP) = -1837.84413757 a.u.  
RMS Gradient Norm = 0.00000373 a.u.  
Imaginary Freq = 0  
Dipole Moment = 1.3658 Debye  
Point Group = C1  
Job cpu time: 6 days 5 hours 36 minutes 55.9 seconds.

**Calculation Type = SP**  
Calculation Method = RM062X  
Basis Set = 6-311++G(2d,3p)  
Charge = 0  
Spin = Singlet  
E(RM062X) = -1837.54401280 a.u.  
Dipole Moment = 1.3772 Debye  
Point Group = C1  
Job cpu time: 1 days 2 hours 38 minutes 42.0 seconds.

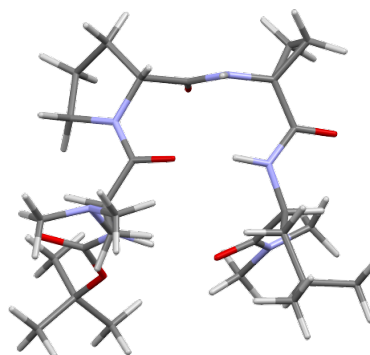

**Table S6.03: B3LYP/6-31+G(d,p)-Optimized Coordinates of 3c**

| Tag | Symbol | X         | Y         | Z         | Tag | Symbol | X         | Y         | Z         |
|-----|--------|-----------|-----------|-----------|-----|--------|-----------|-----------|-----------|
| 1   | O      | 2.466078  | 0.896135  | -1.791502 | 66  | H      | 2.660814  | -2.09629  | -2.827022 |
| 2   | O      | 3.329082  | -0.957984 | 1.842992  | 67  | C      | 1.422271  | -3.443896 | -1.667951 |
| 3   | O      | -0.481828 | -3.026455 | 2.198558  | 68  | H      | 0.778974  | -3.374186 | -0.781983 |
| 4   | O      | -1.224408 | -0.848688 | -0.773897 | 69  | C      | 2.554342  | -4.435183 | -1.354311 |
| 5   | O      | -1.129351 | 2.293468  | 1.041541  | 70  | H      | 3.244366  | -4.52406  | -2.204267 |
| 6   | O      | 0.102143  | 3.406651  | -0.551616 | 71  | H      | 2.149588  | -5.432418 | -1.149038 |
| 7   | N      | 4.588417  | 0.163603  | -1.395542 | 72  | H      | 3.135463  | -4.13725  | -0.475495 |
| 8   | N      | 1.700634  | -1.053644 | 0.256868  | 73  | C      | 0.561565  | -3.956723 | -2.833413 |
| 9   | H      | 0.71668   | -0.952241 | 0.023094  | 74  | H      | -0.276824 | -3.280098 | -3.031402 |
| 10  | N      | -0.307697 | -0.743583 | 2.19298   | 75  | H      | 0.15056   | -4.948225 | -2.612017 |
| 11  | H      | -0.73823  | 0.12926   | 1.898993  | 76  | H      | 1.153781  | -4.040475 | -3.754422 |
| 12  | N      | -2.813141 | -0.587524 | 0.819162  | 77  | C      | -3.224672 | 0.768136  | -2.383545 |
| 13  | N      | -1.488207 | 2.002463  | -1.198791 | 78  | H      | -3.281046 | 1.694258  | -2.984045 |
| 14  | H      | -0.986914 | 1.997979  | -2.07697  | 79  | H      | -2.538739 | 0.084799  | -2.893994 |
| 15  | N      | -4.532374 | 0.124844  | -2.25156  | 80  | C      | -4.797381 | -0.827627 | -3.328723 |
| 16  | C      | 5.537602  | -0.716729 | -0.707499 | 81  | H      | -4.851503 | -0.347594 | -4.324407 |
| 17  | H      | 5.124749  | -1.066681 | 0.239845  | 82  | H      | -5.752215 | -1.329703 | -3.144141 |
| 18  | H      | 6.436074  | -0.135977 | -0.481549 | 83  | H      | -4.012678 | -1.588486 | -3.353337 |
| 19  | H      | 5.835173  | -1.569892 | -1.331353 | 84  | C      | -5.615275 | 1.099438  | -2.137058 |
| 20  | C      | 5.159467  | 1.326929  | -2.06718  | 85  | H      | -5.422181 | 1.794912  | -1.314597 |
| 21  | H      | 4.382904  | 1.814425  | -2.654738 | 86  | H      | -6.557097 | 0.583239  | -1.926794 |
| 22  | H      | 5.976486  | 1.008858  | -2.72483  | 87  | H      | -5.746511 | 1.696367  | -3.059879 |
| 23  | H      | 5.558443  | 2.04537   | -1.33887  |     |        |           |           |           |
| 24  | C      | 3.22877   | 0.025168  | -1.358383 |     |        |           |           |           |
| 25  | C      | 2.643155  | -1.302039 | -0.827733 |     |        |           |           |           |
| 26  | H      | 3.431106  | -1.932399 | -0.419886 |     |        |           |           |           |
| 27  | C      | 2.12984   | -0.917669 | 1.533953  |     |        |           |           |           |
| 28  | C      | 1.071855  | -0.71036  | 2.598776  |     |        |           |           |           |
| 29  | C      | 1.408812  | -1.230321 | 3.98289   |     |        |           |           |           |
| 30  | H      | 0.581328  | -1.65524  | 4.539512  |     |        |           |           |           |
| 31  | H      | 2.359083  | -1.743749 | 4.073997  |     |        |           |           |           |
| 32  | C      | 1.431512  | 0.244028  | 3.729375  |     |        |           |           |           |
| 33  | H      | 2.397969  | 0.729852  | 3.651417  |     |        |           |           |           |
| 34  | H      | 0.621414  | 0.853915  | 4.117825  |     |        |           |           |           |
| 35  | C      | -0.966025 | -1.921695 | 1.974397  |     |        |           |           |           |
| 36  | C      | -2.420724 | -1.837933 | 1.49602   |     |        |           |           |           |
| 37  | H      | -2.544497 | -2.681124 | 0.808246  |     |        |           |           |           |
| 38  | C      | -3.409329 | -1.936473 | 2.680346  |     |        |           |           |           |
| 39  | H      | -3.607246 | -2.97616  | 2.947372  |     |        |           |           |           |
| 40  | H      | -2.985512 | -1.439064 | 3.560581  |     |        |           |           |           |
| 41  | C      | -4.646494 | -1.175326 | 2.18515   |     |        |           |           |           |
| 42  | H      | -5.291977 | -0.830404 | 2.997768  |     |        |           |           |           |
| 43  | H      | -5.244684 | -1.811925 | 1.523278  |     |        |           |           |           |
| 44  | C      | -4.051966 | -0.009903 | 1.382931  |     |        |           |           |           |
| 45  | H      | -4.719732 | 0.317506  | 0.585744  |     |        |           |           |           |
| 46  | H      | -3.812059 | 0.845979  | 2.026562  |     |        |           |           |           |
| 47  | C      | -2.173361 | -0.201032 | -0.310956 |     |        |           |           |           |
| 48  | C      | -2.614017 | 1.103684  | -1.009651 |     |        |           |           |           |
| 49  | H      | -3.346253 | 1.632003  | -0.396515 |     |        |           |           |           |
| 50  | C      | -0.836464 | 2.548222  | -0.126983 |     |        |           |           |           |
| 51  | C      | 1.037508  | 4.091215  | 0.367847  |     |        |           |           |           |
| 52  | C      | 1.853805  | 3.060168  | 1.148688  |     |        |           |           |           |
| 53  | H      | 1.234739  | 2.528244  | 1.871726  |     |        |           |           |           |
| 54  | H      | 2.656912  | 3.570848  | 1.691111  |     |        |           |           |           |
| 55  | H      | 2.301837  | 2.338603  | 0.460379  |     |        |           |           |           |
| 56  | C      | 0.255972  | 5.041833  | 1.280005  |     |        |           |           |           |
| 57  | H      | -0.348043 | 5.734708  | 0.684819  |     |        |           |           |           |
| 58  | H      | 0.959715  | 5.631225  | 1.877546  |     |        |           |           |           |
| 59  | H      | -0.399983 | 4.490423  | 1.95595   |     |        |           |           |           |
| 60  | C      | 1.930813  | 4.867337  | -0.602979 |     |        |           |           |           |
| 61  | H      | 2.446184  | 4.177562  | -1.27692  |     |        |           |           |           |
| 62  | H      | 2.677592  | 5.44031   | -0.044279 |     |        |           |           |           |
| 63  | H      | 1.336582  | 5.564046  | -1.20244  |     |        |           |           |           |
| 64  | C      | 1.94621   | -2.030205 | -1.994183 |     |        |           |           |           |
| 65  | H      | 1.121514  | -1.397451 | -2.339981 |     |        |           |           |           |

**Calculation Type = FREQ**

Calculation Method = RB3LYP

Basis Set = 6-31+G(d,p)

Charge = 0

Spin = Singlet

E(RB3LYP) = -1837.83735371 a.u.

RMS Gradient Norm = 0.00000401 a.u.

Imaginary Freq = 0

Dipole Moment = 5.8323 Debye

Point Group = C1

Job cpu time: 7 days 7 hours 36 minutes 13.4 seconds.

**Calculation Type = SP**

Calculation Method = RM062X

Basis Set = 6-311++G(2d,3p)

Charge = 0

Spin = Singlet

E(RM062X) = -1837.54323198 a.u.

Dipole Moment = 5.8650 Debye

Point Group = C1

Job cpu time: 1 days 16 hours 3 minutes 42.5 seconds.

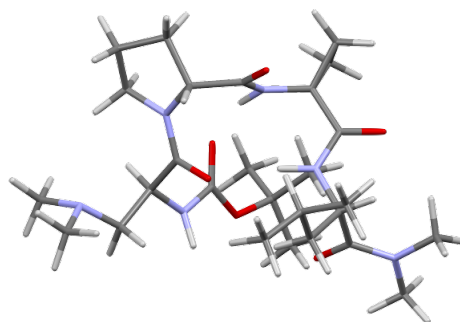

**Table S6.04:** Comparative Energy Data for **3a–c**

| Method                                                  |                                  | Boc-Dmaa-D-Pro-Acpc-Leu-NMe <sub>2</sub> (3) |                 |                 |
|---------------------------------------------------------|----------------------------------|----------------------------------------------|-----------------|-----------------|
|                                                         |                                  | 3a                                           | 3b              | 3c              |
| sp of X-ray crystal structure<br>M06-2X/6-311++G(2d,3p) | E(sp, M06-2X, au)                | -1837.082149870                              | -1837.088306590 | -1837.055931860 |
|                                                         | Relative E(sp, M06-2X, kcal/mol) | 3.86                                         | 0.00            | 20.32           |
|                                                         | Dipole Moment (D)                | 1.851                                        | 3.203           | 7.653           |
| opt of X-ray crystal structure<br>B3LYP/6-31+G(d,p)     | E(opt, B3LYP, au)                | -1837.843344280                              | -1837.844137570 | -1837.837353710 |
|                                                         | ZP Correction (au)               | 0.755768                                     | 0.755838        | 0.755045        |
|                                                         | E Correction (au)                | 0.800094                                     | 0.800203        | 0.799889        |
|                                                         | H Correction (au)                | 0.801039                                     | 0.801147        | 0.800833        |
|                                                         | G Correction (au)                | 0.674431                                     | 0.674498        | 0.673066        |
|                                                         | ZPE (au)                         | -1837.087576280                              | -1837.088299570 | -1837.082308710 |
|                                                         | Relative ZPE (kcal/mol)          | 0.45                                         | 0.00            | 3.76            |
|                                                         | E (au)                           | -1837.043250280                              | -1837.043934570 | -1837.037464710 |
|                                                         | Relative E (kcal/mol)            | 0.43                                         | 0.00            | 4.06            |
|                                                         | H (au)                           | -1837.042305280                              | -1837.042990570 | -1837.036520710 |
|                                                         | Relative H (kcal/mol)            | 0.43                                         | 0.00            | 4.06            |
|                                                         | G (au)                           | -1837.168913280                              | -1837.169639570 | -1837.164287710 |
|                                                         | Relative G (kcal/mol)            | 0.46                                         | 0.00            | 3.36            |
|                                                         | S (cal/mol*K)                    | 266.468                                      | 266.556         | 268.909         |
| Relative S(cal/mol*K)                                   | -0.09                            | 0.00                                         | 2.35            |                 |
| Dipole Moment (D)                                       | 1.715                            | 1.366                                        | 5.832           |                 |
| sp of optimized structure<br>M06-2X/6-311++G(2d,3p)     | E(sp, M06-2X, au)                | -1837.546041490                              | -1837.544012800 | -1837.543231980 |
|                                                         | ZPE (au)                         | -1836.790273490                              | -1836.788174800 | -1836.788186980 |
|                                                         | Relative ZPE (kcal/mol)          | 0.00                                         | 1.32            | 1.31            |
|                                                         | E (au)                           | -1836.745947490                              | -1836.743809800 | -1836.743342980 |
|                                                         | Relative E (kcal/mol)            | 0.00                                         | 1.34            | 1.63            |
|                                                         | H (au)                           | -1836.745002490                              | -1836.742865800 | -1836.742398980 |
|                                                         | Relative H (kcal/mol)            | 0.00                                         | 1.34            | 1.63            |
|                                                         | G (au)                           | -1836.871610490                              | -1836.869514800 | -1836.870165980 |
|                                                         | Relative G (kcal/mol)            | 0.00                                         | 1.32            | 0.91            |
| Dipole Moment (D)                                       | 1.699                            | 1.377                                        | 5.865           |                 |

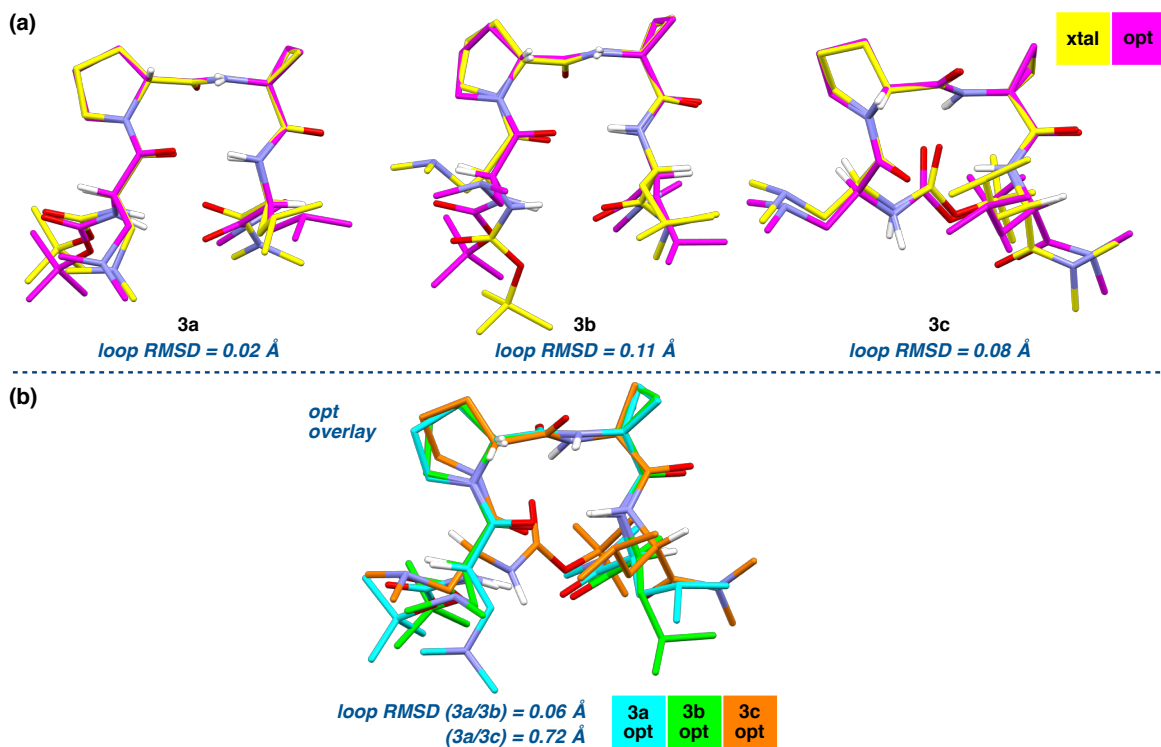

**Figure S6.01:** (a) Overlays of the DFT-optimized structures of **3a–c** with the corresponding crystal structures. (b) Overlay of the optimized structures of **3a–c**.

## C. Optimization of Peptides 4a–e

**Table S6.05:** B3LYP/6-31+G(d,p)-Optimized Coordinates of **4a**

| Tag | Symbol | X         | Y         | Z         | Tag | Symbol | X         | Y         | Z         |
|-----|--------|-----------|-----------|-----------|-----|--------|-----------|-----------|-----------|
| 1   | O      | 3.544854  | -0.562223 | 1.835642  | 63  | H      | 2.244587  | 2.633729  | 0.612698  |
| 2   | O      | -0.058118 | -2.993089 | 2.175299  | 64  | C      | -0.10054  | 5.143503  | 1.227573  |
| 3   | O      | -0.983576 | -0.885109 | -0.812595 | 65  | H      | -0.733519 | 5.758999  | 0.57975   |
| 4   | O      | -1.182751 | 2.245893  | 1.035254  | 66  | H      | 0.512389  | 5.813519  | 1.840035  |
| 5   | O      | -0.01094  | 3.442058  | -0.544016 | 67  | H      | -0.736876 | 4.552958  | 1.889271  |
| 6   | O      | 2.697224  | 1.22421   | -1.46459  | 68  | C      | 3.31083   | 0.176764  | -1.483382 |
| 7   | O      | 4.47749   | 0.010236  | -2.143851 | 69  | C      | 4.984655  | 1.163051  | -2.840498 |
| 8   | N      | 1.937358  | -0.899119 | 0.257429  | 70  | H      | 5.916044  | 0.836533  | -3.302451 |
| 9   | H      | 0.947637  | -0.900879 | 0.029114  | 71  | H      | 4.272928  | 1.495586  | -3.600477 |
| 10  | N      | -0.096165 | -0.703628 | 2.172178  | 72  | H      | 5.169905  | 1.9792    | -2.138024 |
| 11  | H      | -0.605905 | 0.125289  | 1.877788  | 73  | C      | -3.114611 | 0.568984  | -2.414599 |
| 12  | N      | -2.595471 | -0.779739 | 0.777506  | 74  | H      | -3.245508 | 1.493705  | -3.005943 |
| 13  | N      | -1.495223 | 1.932418  | -1.206856 | 75  | H      | -2.371045 | -0.048883 | -2.927988 |
| 14  | H      | -1.015465 | 2.006011  | -2.093128 | 76  | C      | -4.544855 | -1.137327 | -3.391456 |
| 15  | N      | -4.364296 | -0.182793 | -2.298766 | 77  | H      | -4.6329   | -0.648151 | -4.38021  |
| 16  | C      | 1.232048  | -4.314597 | -2.405063 | 78  | H      | -5.456491 | -1.718033 | -3.220257 |
| 17  | H      | 0.282524  | -3.817852 | -2.634048 | 79  | H      | -3.700709 | -1.831461 | -3.422056 |
| 18  | H      | 1.005573  | -5.326749 | -2.051798 | 80  | C      | -5.525574 | 0.695915  | -2.175277 |
| 19  | H      | 1.798886  | -4.408069 | -3.340964 | 81  | H      | -5.703309 | 1.293299  | -3.090012 |
| 20  | C      | 3.3235    | -4.273243 | -0.98416  | 82  | H      | -5.395138 | 1.392861  | -1.341913 |
| 21  | H      | 3.878221  | -3.771163 | -0.185176 | 83  | H      | -6.421353 | 0.099161  | -1.977388 |
| 22  | H      | 3.987022  | -4.359014 | -1.854898 |     |        |           |           |           |
| 23  | H      | 3.099333  | -5.28674  | -0.633739 |     |        |           |           |           |
| 24  | C      | 2.029434  | -3.530309 | -1.35073  |     |        |           |           |           |
| 25  | H      | 1.411386  | -3.458291 | -0.447123 |     |        |           |           |           |
| 26  | C      | 2.298781  | -2.100544 | -1.865219 |     |        |           |           |           |
| 27  | H      | 1.361818  | -1.668807 | -2.23997  |     |        |           |           |           |
| 28  | H      | 2.995494  | -2.147078 | -2.711301 |     |        |           |           |           |
| 29  | C      | 2.885224  | -1.132491 | -0.811661 |     |        |           |           |           |
| 30  | H      | 3.789714  | -1.555481 | -0.367127 |     |        |           |           |           |
| 31  | C      | 2.353094  | -0.662348 | 1.529268  |     |        |           |           |           |
| 32  | C      | 1.272527  | -0.539635 | 2.58584   |     |        |           |           |           |
| 33  | C      | 1.647489  | -1.019354 | 3.975638  |     |        |           |           |           |
| 34  | H      | 0.85878   | -1.514727 | 4.530539  |     |        |           |           |           |
| 35  | H      | 2.640034  | -1.443551 | 4.075538  |     |        |           |           |           |
| 36  | C      | 1.536775  | 0.449099  | 3.711266  |     |        |           |           |           |
| 37  | H      | 2.455823  | 1.019501  | 3.633236  |     |        |           |           |           |
| 38  | H      | 0.673055  | 0.985613  | 4.092531  |     |        |           |           |           |
| 39  | C      | -0.640451 | -1.936895 | 1.949282  |     |        |           |           |           |
| 40  | C      | -2.092476 | -1.988853 | 1.457644  |     |        |           |           |           |
| 41  | H      | -2.131033 | -2.838923 | 0.76841   |     |        |           |           |           |
| 42  | C      | -3.076784 | -2.180869 | 2.634017  |     |        |           |           |           |
| 43  | H      | -3.177718 | -3.234808 | 2.899291  |     |        |           |           |           |
| 44  | H      | -2.708982 | -1.646622 | 3.517707  |     |        |           |           |           |
| 45  | C      | -4.376    | -1.538602 | 2.130251  |     |        |           |           |           |
| 46  | H      | -5.056575 | -1.255945 | 2.938214  |     |        |           |           |           |
| 47  | H      | -4.907809 | -2.227432 | 1.464001  |     |        |           |           |           |
| 48  | C      | -3.887198 | -0.321749 | 1.333304  |     |        |           |           |           |
| 49  | H      | -4.57703  | -0.058627 | 0.531285  |     |        |           |           |           |
| 50  | H      | -3.733096 | 0.55248   | 1.978552  |     |        |           |           |           |
| 51  | C      | -1.988807 | -0.330136 | -0.347024 |     |        |           |           |           |
| 52  | C      | -2.540962 | 0.939033  | -1.033763 |     |        |           |           |           |
| 53  | H      | -3.317978 | 1.393842  | -0.41698  |     |        |           |           |           |
| 54  | C      | -0.894612 | 2.522962  | -0.128872 |     |        |           |           |           |
| 55  | C      | 0.813225  | 4.244147  | 0.389585  |     |        |           |           |           |
| 56  | C      | 1.672128  | 5.070839  | -0.570116 |     |        |           |           |           |
| 57  | H      | 2.284674  | 4.413199  | -1.192957 |     |        |           |           |           |
| 58  | H      | 2.333093  | 5.731591  | -0.000359 |     |        |           |           |           |
| 59  | H      | 1.043174  | 5.686168  | -1.221045 |     |        |           |           |           |
| 60  | C      | 1.688561  | 3.328784  | 1.24696   |     |        |           |           |           |
| 61  | H      | 1.091206  | 2.761616  | 1.961291  |     |        |           |           |           |
| 62  | H      | 2.40585   | 3.939881  | 1.80567   |     |        |           |           |           |

### Calculation Type = FREQ

Calculation Method = RB3LYP

Basis Set = 6-31+G(d,p)

Charge = 0

Spin = Singlet

E(RB3LYP) = -1818.39243782 a.u.

RMS Gradient Norm = 0.00000473 a.u.

Imaginary Freq = 0

Dipole Moment = 8.1875 Debye

Point Group = C1

Job cpu time: 5 days 15 hours 54 minutes 43.7 seconds.

### Calculation Type = SP

Calculation Method = RM062X

Basis Set = 6-311++G(2d,3p)

Charge = 0

Spin = Singlet

E(RM062X) = -1818.11366939 a.u.

Dipole Moment = 8.1820 Debye

Point Group = C1

Job cpu time: 1 days 8 hours 14 minutes 0.2 seconds.

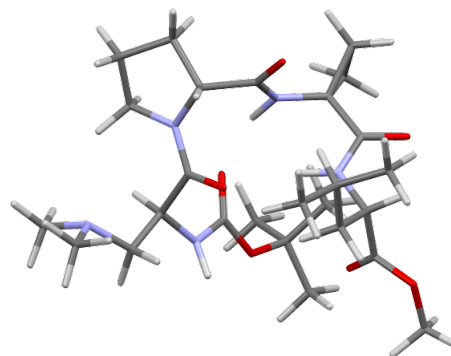



**Table S6.06: B3LYP/6-31+G(d,p)-Optimized Coordinates of 4b**

| Tag | Symbol | X         | Y         | Z         | Tag | Symbol | X         | Y         | Z         |
|-----|--------|-----------|-----------|-----------|-----|--------|-----------|-----------|-----------|
| 1   | O      | 4.47674   | 0.012165  | -2.144687 | 66  | H      | 3.99043   | -4.357584 | -1.852777 |
| 2   | O      | 2.695765  | 1.224874  | -1.465016 | 67  | H      | 3.103068  | -5.285478 | -0.631513 |
| 3   | O      | 3.545171  | -0.559613 | 1.835381  | 68  | H      | 3.880591  | -3.769082 | -0.183343 |
| 4   | O      | -0.056927 | -2.992749 | 2.176635  | 69  | C      | 1.235531  | -4.315738 | -2.403779 |
| 5   | O      | -0.983147 | -0.886205 | -0.812626 | 70  | H      | 1.802802  | -4.409454 | -3.339394 |
| 6   | O      | -1.18405  | 2.245471  | 1.035025  | 71  | H      | 0.28577   | -3.819773 | -2.633468 |
| 7   | O      | -0.012668 | 3.442112  | -0.54421  | 72  | H      | 1.009563  | -5.327809 | -2.049951 |
| 8   | N      | 1.937866  | -0.89879  | 0.257451  | 73  | C      | -3.114331 | 0.56704   | -2.414986 |
| 9   | H      | 0.94817   | -0.900641 | 0.029033  | 74  | H      | -3.245473 | 1.491618  | -3.00652  |
| 10  | N      | -0.095707 | -0.703289 | 2.172074  | 75  | H      | -2.370421 | -0.050633 | -2.928112 |
| 11  | H      | -0.605955 | 0.125276  | 1.877596  | 76  | C      | -5.525383 | 0.69299   | -2.17581  |
| 12  | N      | -2.594941 | -0.780857 | 0.7776    | 77  | H      | -5.395268 | 1.389983  | -1.34244  |
| 13  | N      | -1.495721 | 1.931247  | -1.207056 | 78  | H      | -6.420918 | 0.09585   | -1.977965 |
| 14  | H      | -1.016295 | 2.00565   | -2.093434 | 79  | H      | -5.703338 | 1.290305  | -3.090554 |
| 15  | N      | -4.363724 | -0.185243 | -2.299287 | 80  | C      | -4.543836 | -1.139681 | -3.392141 |
| 16  | C      | 4.982775  | 1.165269  | -2.841673 | 81  | H      | -4.631928 | -0.650379 | -4.380831 |
| 17  | H      | 5.167489  | 1.981724  | -2.139413 | 82  | H      | -5.455305 | -1.720709 | -3.221131 |
| 18  | H      | 4.270602  | 1.497043  | -3.601571 | 83  | H      | -3.699461 | -1.833538 | -3.42274  |
| 19  | H      | 5.914339  | 0.839442  | -3.303767 |     |        |           |           |           |
| 20  | C      | 3.310186  | 0.177909  | -1.4838   |     |        |           |           |           |
| 21  | C      | 2.885872  | -1.131522 | -0.811637 |     |        |           |           |           |
| 22  | H      | 3.790807  | -1.553506 | -0.367028 |     |        |           |           |           |
| 23  | C      | 2.353476  | -0.660869 | 1.529129  |     |        |           |           |           |
| 24  | C      | 1.272877  | -0.538439 | 2.585701  |     |        |           |           |           |
| 25  | C      | 1.648172  | -1.017702 | 3.975593  |     |        |           |           |           |
| 26  | H      | 0.85977   | -1.513426 | 4.530619  |     |        |           |           |           |
| 27  | H      | 2.640945  | -1.44137  | 4.075518  |     |        |           |           |           |
| 28  | C      | 1.53667   | 0.45063   | 3.710922  |     |        |           |           |           |
| 29  | H      | 2.455426  | 1.02148   | 3.632699  |     |        |           |           |           |
| 30  | H      | 0.672697  | 0.986777  | 4.092133  |     |        |           |           |           |
| 31  | C      | -0.63957  | -1.936884 | 1.949924  |     |        |           |           |           |
| 32  | C      | -2.091509 | -1.989598 | 1.458086  |     |        |           |           |           |
| 33  | H      | -2.129573 | -2.839832 | 0.769028  |     |        |           |           |           |
| 34  | C      | -3.075865 | -2.181773 | 2.634392  |     |        |           |           |           |
| 35  | H      | -3.176433 | -3.235703 | 2.899856  |     |        |           |           |           |
| 36  | H      | -2.708353 | -1.647237 | 3.518028  |     |        |           |           |           |
| 37  | C      | -4.375286 | -1.540092 | 2.130403  |     |        |           |           |           |
| 38  | H      | -5.056005 | -1.2575   | 2.938271  |     |        |           |           |           |
| 39  | H      | -4.906805 | -2.229267 | 1.46428   |     |        |           |           |           |
| 40  | C      | -3.886894 | -0.32324  | 1.333194  |     |        |           |           |           |
| 41  | H      | -4.576796 | -0.060624 | 0.531069  |     |        |           |           |           |
| 42  | H      | -3.733174 | 0.551231  | 1.978197  |     |        |           |           |           |
| 43  | C      | -1.988509 | -0.331424 | -0.347153 |     |        |           |           |           |
| 44  | C      | -2.541107 | 0.937463  | -1.034111 |     |        |           |           |           |
| 45  | H      | -3.318377 | 1.391969  | -0.417437 |     |        |           |           |           |
| 46  | C      | -0.895874 | 2.522526  | -0.1291   |     |        |           |           |           |
| 47  | C      | 0.810453  | 4.245123  | 0.389459  |     |        |           |           |           |
| 48  | C      | 1.668919  | 5.072418  | -0.570125 |     |        |           |           |           |
| 49  | H      | 2.281992  | 4.415174  | -1.192867 |     |        |           |           |           |
| 50  | H      | 2.329342  | 5.733636  | -0.00028  |     |        |           |           |           |
| 51  | H      | 1.039637  | 5.687299  | -1.221165 |     |        |           |           |           |
| 52  | C      | 1.686376  | 3.330694  | 1.24727   |     |        |           |           |           |
| 53  | H      | 1.089257  | 2.76283   | 1.961255  |     |        |           |           |           |
| 54  | H      | 2.402717  | 3.942538  | 1.806372  |     |        |           |           |           |
| 55  | H      | 2.243471  | 2.636257  | 0.613273  |     |        |           |           |           |
| 56  | C      | -0.104339 | 5.143769  | 1.227065  |     |        |           |           |           |
| 57  | H      | -0.737633 | 5.758678  | 0.578993  |     |        |           |           |           |
| 58  | H      | 0.507836  | 5.81435   | 1.83967   |     |        |           |           |           |
| 59  | H      | -0.740361 | 4.552722  | 1.888614  |     |        |           |           |           |
| 60  | C      | 2.300305  | -2.100542 | -1.864793 |     |        |           |           |           |
| 61  | H      | 1.363033  | -1.669758 | -2.239881 |     |        |           |           |           |
| 62  | H      | 2.997158  | -2.146929 | -2.710769 |     |        |           |           |           |
| 63  | C      | 2.031988  | -3.530252 | -1.34963  |     |        |           |           |           |
| 64  | H      | 1.41365   | -3.458227 | -0.446221 |     |        |           |           |           |
| 65  | C      | 3.326543  | -4.271953 | -0.9823   |     |        |           |           |           |

**Calculation Type = FREQ**

Calculation Method = RB3LYP

Basis Set = 6-31+G(d,p)

Charge = 0

Spin = Singlet

E(RB3LYP) = -1818.39243826 a.u.

RMS Gradient Norm = 0.00000203 a.u.

Imaginary Freq = 0

Dipole Moment = 8.1893 Debye

Point Group = C1

Job cpu time: 5 days 13 hours 35 minutes 22.0 seconds.

**Calculation Type = SP**

Calculation Method = RM062X

Basis Set = 6-311++G(2d,3p)

Charge = 0

Spin = Singlet

E(RM062X) = -1818.11366318 a.u.

Dipole Moment = 8.1839 Debye

Point Group = C1

Job cpu time: 1 days 10 hours 32 minutes 58.4 seconds.

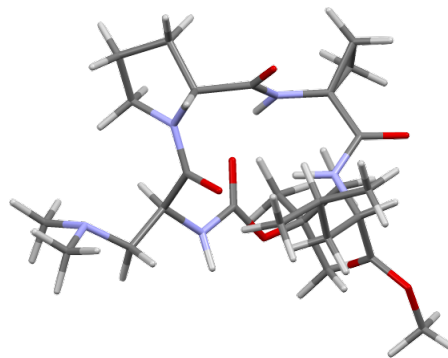

**Table S6.07: B3LYP/6-31+G(d,p)-Optimized Coordinates of 4c**

| Tag | Symbol | X         | Y         | Z         | Tag | Symbol | X         | Y         | Z         |
|-----|--------|-----------|-----------|-----------|-----|--------|-----------|-----------|-----------|
| 1   | O      | 4.476702  | 0.012808  | -2.144536 | 66  | H      | 3.99137   | -4.357015 | -1.852602 |
| 2   | O      | 2.695189  | 1.22502   | -1.465379 | 67  | H      | 3.104275  | -5.285107 | -0.631309 |
| 3   | O      | 3.545189  | -0.559361 | 1.835448  | 68  | H      | 3.881405  | -3.768496 | -0.183193 |
| 4   | O      | -0.05664  | -2.992715 | 2.176606  | 69  | C      | 1.236412  | -4.315954 | -2.403499 |
| 5   | O      | -0.983085 | -0.886543 | -0.812552 | 70  | H      | 0.286496  | -3.820273 | -2.633158 |
| 6   | O      | -1.184405 | 2.245319  | 1.035002  | 71  | H      | 1.010749  | -5.328072 | -2.049614 |
| 7   | O      | -0.013432 | 3.442418  | -0.54419  | 72  | H      | 1.803645  | -4.40956  | -3.33915  |
| 8   | N      | 1.937943  | -0.898585 | 0.257477  | 73  | C      | -3.114118 | 0.566456  | -2.415145 |
| 9   | H      | 0.948242  | -0.900706 | 0.029073  | 74  | H      | -3.245165 | 1.490933  | -3.006856 |
| 10  | N      | -0.095695 | -0.703266 | 2.1721    | 75  | H      | -2.370153 | -0.051316 | -2.92807  |
| 11  | H      | -0.606031 | 0.125244  | 1.877606  | 76  | C      | -4.543571 | -1.140168 | -3.39247  |
| 12  | N      | -2.59491  | -0.781136 | 0.777641  | 77  | H      | -4.631455 | -0.650807 | -4.381141 |
| 13  | N      | -1.495749 | 1.930871  | -1.207094 | 78  | H      | -5.455121 | -1.721113 | -3.221641 |
| 14  | H      | -1.016298 | 2.005369  | -2.093449 | 79  | H      | -3.699263 | -1.834109 | -3.422977 |
| 15  | N      | -4.363536 | -0.185804 | -2.299542 | 80  | C      | -5.525201 | 0.692438  | -2.176138 |
| 16  | C      | 4.982444  | 1.165955  | -2.841651 | 81  | H      | -5.395199 | 1.389367  | -1.342702 |
| 17  | H      | 5.166992  | 1.982519  | -2.139477 | 82  | H      | -6.420755 | 0.095284  | -1.978447 |
| 18  | H      | 4.270177  | 1.497496  | -3.601555 | 83  | H      | -5.703032 | 1.289812  | -3.090852 |
| 19  | H      | 5.914071  | 0.840308  | -3.303734 |     |        |           |           |           |
| 20  | C      | 3.309987  | 0.178266  | -1.483866 |     |        |           |           |           |
| 21  | C      | 2.885981  | -1.13122  | -0.81161  |     |        |           |           |           |
| 22  | H      | 3.791005  | -1.552988 | -0.366986 |     |        |           |           |           |
| 23  | C      | 2.353508  | -0.660696 | 1.529166  |     |        |           |           |           |
| 24  | C      | 1.272875  | -0.538286 | 2.585715  |     |        |           |           |           |
| 25  | C      | 1.536566  | 0.450954  | 3.710824  |     |        |           |           |           |
| 26  | H      | 2.455258  | 1.021885  | 3.632536  |     |        |           |           |           |
| 27  | H      | 0.672537  | 0.987069  | 4.091945  |     |        |           |           |           |
| 28  | C      | 1.648187  | -1.017345 | 3.975655  |     |        |           |           |           |
| 29  | H      | 0.859817  | -1.51305  | 4.530738  |     |        |           |           |           |
| 30  | H      | 2.640982  | -1.440934 | 4.075657  |     |        |           |           |           |
| 31  | C      | -0.639433 | -1.936905 | 1.949978  |     |        |           |           |           |
| 32  | C      | -2.091421 | -1.989758 | 1.458285  |     |        |           |           |           |
| 33  | H      | -2.12953  | -2.840128 | 0.769399  |     |        |           |           |           |
| 34  | C      | -3.075701 | -2.181711 | 2.634687  |     |        |           |           |           |
| 35  | H      | -2.708209 | -1.646846 | 3.51814   |     |        |           |           |           |
| 36  | H      | -3.17613  | -3.235561 | 2.900495  |     |        |           |           |           |
| 37  | C      | -4.37519  | -1.540306 | 2.130578  |     |        |           |           |           |
| 38  | H      | -4.906654 | -2.229676 | 1.46461   |     |        |           |           |           |
| 39  | H      | -5.055939 | -1.257615 | 2.93838   |     |        |           |           |           |
| 40  | C      | -3.886936 | -0.323562 | 1.333093  |     |        |           |           |           |
| 41  | H      | -4.576853 | -0.061213 | 0.530892  |     |        |           |           |           |
| 42  | H      | -3.733343 | 0.55107   | 1.977903  |     |        |           |           |           |
| 43  | C      | -1.988496 | -0.331783 | -0.34714  |     |        |           |           |           |
| 44  | C      | -2.541098 | 0.93703   | -1.03423  |     |        |           |           |           |
| 45  | H      | -3.318479 | 1.391533  | -0.417688 |     |        |           |           |           |
| 46  | C      | -0.896241 | 2.522442  | -0.129116 |     |        |           |           |           |
| 47  | C      | 0.809871  | 4.24526   | 0.389452  |     |        |           |           |           |
| 48  | C      | 1.685855  | 3.330735  | 1.247087  |     |        |           |           |           |
| 49  | H      | 1.08888   | 2.76308   | 1.961344  |     |        |           |           |           |
| 50  | H      | 2.402527  | 3.942498  | 1.805855  |     |        |           |           |           |
| 51  | H      | 2.242607  | 2.636118  | 0.61299   |     |        |           |           |           |
| 52  | C      | 1.668273  | 5.072584  | -0.570155 |     |        |           |           |           |
| 53  | H      | 2.281484  | 4.415397  | -1.192817 |     |        |           |           |           |
| 54  | H      | 2.328556  | 5.733959  | -0.000334 |     |        |           |           |           |
| 55  | H      | 1.038931  | 5.687311  | -1.221277 |     |        |           |           |           |
| 56  | C      | -0.104785 | 5.143896  | 1.227234  |     |        |           |           |           |
| 57  | H      | -0.737987 | 5.75902   | 0.579281  |     |        |           |           |           |
| 58  | H      | 0.507456  | 5.81426   | 1.840004  |     |        |           |           |           |
| 59  | H      | -0.740898 | 4.55278   | 1.888638  |     |        |           |           |           |
| 60  | C      | 2.300628  | -2.10044  | -1.864701 |     |        |           |           |           |
| 61  | H      | 1.363241  | -1.669917 | -2.239779 |     |        |           |           |           |
| 62  | H      | 2.997455  | -2.146679 | -2.710703 |     |        |           |           |           |
| 63  | C      | 2.032711  | -3.53019  | -1.349449 |     |        |           |           |           |
| 64  | H      | 1.414384  | -3.458258 | -0.446023 |     |        |           |           |           |
| 65  | C      | 3.327467  | -4.27153  | -0.982124 |     |        |           |           |           |

**Calculation Type = FREQ**

Calculation Method = RB3LYP

Basis Set = 6-31+G(d,p)

Charge = 0

Spin = Singlet

E(RB3LYP) = -1818.39243834 a.u.

RMS Gradient Norm = 0.00000253 a.u.

Imaginary Freq = 0

Dipole Moment = 8.1888 Debye

Point Group = C1

Job cpu time: 6 days 10 hours 41 minutes 12.6 seconds.

**Calculation Type = SP**

Calculation Method = RM062X

Basis Set = 6-311++G(2d,3p)

Charge = 0

Spin = Singlet

E(RM062X) = -1817.74111503 a.u.

Dipole Moment = 10.5122 Debye

Point Group = C1

Job cpu time: 1 days 5 hours 13 minutes 17.2 seconds.

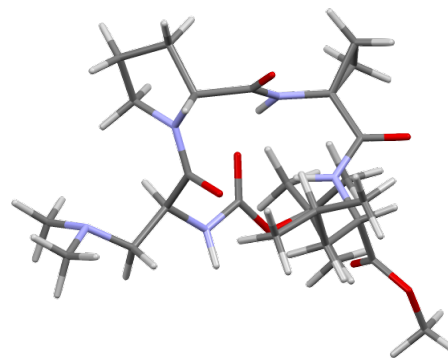

**Table S6.08: B3LYP/6-31+G(d,p)-Optimized Coordinates of 4d**

| Tag | Symbol | X         | Y         | Z         | Tag | Symbol | X         | Y         | Z         |
|-----|--------|-----------|-----------|-----------|-----|--------|-----------|-----------|-----------|
| 1   | O      | 4.476103  | 0.01349   | -2.146054 | 66  | H      | 3.992251  | -4.356487 | -1.851816 |
| 2   | O      | 2.695385  | 1.226101  | -1.465537 | 67  | H      | 3.105806  | -5.283814 | -0.629449 |
| 3   | O      | 3.545401  | -0.559164 | 1.835637  | 68  | H      | 3.882904  | -3.766776 | -0.182772 |
| 4   | O      | -0.055358 | -2.992729 | 2.175265  | 69  | C      | 1.237466  | -4.315988 | -2.402139 |
| 5   | O      | -0.982675 | -0.886481 | -0.812828 | 70  | H      | 0.287416  | -3.820612 | -2.631865 |
| 6   | O      | -1.18502  | 2.244973  | 1.035198  | 71  | H      | 1.012084  | -5.328005 | -2.047797 |
| 7   | O      | -0.014201 | 3.442391  | -0.543846 | 72  | H      | 1.804625  | -4.409833 | -3.337795 |
| 8   | N      | 1.938241  | -0.897324 | 0.257324  | 73  | C      | -3.114481 | 0.566218  | -2.415116 |
| 9   | H      | 0.948522  | -0.89997  | 0.029033  | 74  | H      | -3.246107 | 1.490902  | -3.006384 |
| 10  | N      | -0.095505 | -0.703316 | 2.171967  | 75  | H      | -2.370231 | -0.050927 | -2.928378 |
| 11  | H      | -0.606091 | 0.125176  | 1.877896  | 76  | C      | -5.525587 | 0.690859  | -2.175915 |
| 12  | N      | -2.594772 | -0.782036 | 0.777167  | 77  | H      | -5.395666 | 1.387899  | -1.342569 |
| 13  | N      | -1.496364 | 1.930731  | -1.206907 | 78  | H      | -6.420763 | 0.093228  | -1.977921 |
| 14  | H      | -1.017172 | 2.005774  | -2.093346 | 79  | H      | -5.70402  | 1.288085  | -3.090629 |
| 15  | N      | -4.363465 | -0.186753 | -2.299623 | 80  | C      | -4.543109 | -1.140953 | -3.392773 |
| 16  | C      | 4.981579  | 1.16657   | -2.843504 | 81  | H      | -4.631506 | -0.651365 | -4.381297 |
| 17  | H      | 5.912999  | 0.840843  | -3.305957 | 82  | H      | -5.454264 | -1.72251  | -3.221895 |
| 18  | H      | 5.166425  | 1.983199  | -2.141489 | 83  | H      | -3.698374 | -1.834351 | -3.423607 |
| 19  | H      | 4.268985  | 1.498031  | -3.603139 |     |        |           |           |           |
| 20  | C      | 3.309919  | 0.179207  | -1.484479 |     |        |           |           |           |
| 21  | C      | 2.886267  | -1.130122 | -0.811707 |     |        |           |           |           |
| 22  | H      | 3.791436  | -1.551437 | -0.366933 |     |        |           |           |           |
| 23  | C      | 2.353745  | -0.660193 | 1.529174  |     |        |           |           |           |
| 24  | C      | 1.273024  | -0.53809  | 2.585688  |     |        |           |           |           |
| 25  | C      | 1.53643   | 0.451185  | 3.7108    |     |        |           |           |           |
| 26  | H      | 2.455029  | 1.022297  | 3.632637  |     |        |           |           |           |
| 27  | H      | 0.672297  | 0.987119  | 4.09195   |     |        |           |           |           |
| 28  | C      | 1.64837   | -1.017096 | 3.97563   |     |        |           |           |           |
| 29  | H      | 0.86007   | -1.512947 | 4.530687  |     |        |           |           |           |
| 30  | H      | 2.641273  | -1.440424 | 4.075661  |     |        |           |           |           |
| 31  | C      | -0.638697 | -1.937123 | 1.94919   |     |        |           |           |           |
| 32  | C      | -2.090763 | -1.990403 | 1.457921  |     |        |           |           |           |
| 33  | H      | -2.128924 | -2.84096  | 0.769277  |     |        |           |           |           |
| 34  | C      | -3.074647 | -2.182306 | 2.634666  |     |        |           |           |           |
| 35  | H      | -3.174815 | -3.236139 | 2.900693  |     |        |           |           |           |
| 36  | H      | -2.707029 | -1.64718  | 3.517882  |     |        |           |           |           |
| 37  | C      | -4.374479 | -1.541353 | 2.130747  |     |        |           |           |           |
| 38  | H      | -5.055082 | -1.258658 | 2.938672  |     |        |           |           |           |
| 39  | H      | -4.905872 | -2.231094 | 1.465124  |     |        |           |           |           |
| 40  | C      | -3.8868   | -0.32471  | 1.332799  |     |        |           |           |           |
| 41  | H      | -4.576986 | -0.062911 | 0.530643  |     |        |           |           |           |
| 42  | H      | -3.733392 | 0.550205  | 1.977279  |     |        |           |           |           |
| 43  | C      | -1.988292 | -0.332181 | -0.347376 |     |        |           |           |           |
| 44  | C      | -2.541414 | 0.93658   | -1.034157 |     |        |           |           |           |
| 45  | H      | -3.318809 | 1.390703  | -0.417362 |     |        |           |           |           |
| 46  | C      | -0.896956 | 2.522281  | -0.12889  |     |        |           |           |           |
| 47  | C      | 0.808612  | 4.245412  | 0.390052  |     |        |           |           |           |
| 48  | C      | 1.68484   | 3.330977  | 1.247551  |     |        |           |           |           |
| 49  | H      | 1.08791   | 2.762694  | 1.961376  |     |        |           |           |           |
| 50  | H      | 2.401006  | 3.942835  | 1.806841  |     |        |           |           |           |
| 51  | H      | 2.242085  | 2.636897  | 0.613305  |     |        |           |           |           |
| 52  | C      | 1.666784  | 5.073353  | -0.569242 |     |        |           |           |           |
| 53  | H      | 2.280165  | 4.416558  | -1.192153 |     |        |           |           |           |
| 54  | H      | 2.326904  | 5.734662  | 0.000839  |     |        |           |           |           |
| 55  | H      | 1.037276  | 5.688159  | -1.220125 |     |        |           |           |           |
| 56  | C      | -0.106519 | 5.143431  | 1.227957  |     |        |           |           |           |
| 57  | H      | -0.740027 | 5.758323  | 0.580077  |     |        |           |           |           |
| 58  | H      | 0.505398  | 5.814032  | 1.840787  |     |        |           |           |           |
| 59  | H      | -0.74234  | 4.551925  | 1.889273  |     |        |           |           |           |
| 60  | C      | 2.301185  | -2.099996 | -1.864369 |     |        |           |           |           |
| 61  | H      | 1.36364   | -1.669921 | -2.239596 |     |        |           |           |           |
| 62  | H      | 2.998018  | -2.146407 | -2.710344 |     |        |           |           |           |
| 63  | C      | 2.033702  | -3.529593 | -1.348482 |     |        |           |           |           |
| 64  | H      | 1.415498  | -3.457529 | -0.445003 |     |        |           |           |           |
| 65  | C      | 3.328725  | -4.270478 | -0.981108 |     |        |           |           |           |

**Calculation Type = FREQ**

Calculation Method = RB3LYP

Basis Set = 6-31+G(d,p)

Charge = 0

Spin = Singlet

E(RB3LYP) = -1818.39243850 a.u.

RMS Gradient Norm = 0.00000790 a.u.

Imaginary Freq = 0

Dipole Moment = 8.1910 Debye

Point Group = C1

Job cpu time: 6 days 6 hours 56 minutes 9.8 seconds.

**Calculation Type = SP**

Calculation Method = RM062X

Basis Set = 6-311++G(2d,3p)

Charge = 0

Spin = Singlet

E(RM062X) = -1818.11367125 a.u.

Dipole Moment = 8.1855 Debye

Point Group = C1

Job cpu time: 1 days 0 hours 42 minutes 4.7 seconds.

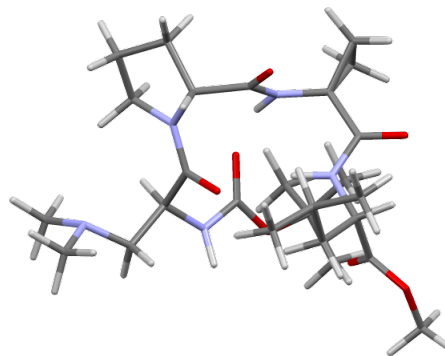

**Table S6.09:** B3LYP/6-31+G(d,p)-Optimized Coordinates of **4e**

| Tag | Symbol | X         | Y         | Z         | Tag | Symbol | X         | Y         | Z         |
|-----|--------|-----------|-----------|-----------|-----|--------|-----------|-----------|-----------|
| 1   | O      | 3.19681   | 1.713609  | -2.810539 | 66  | H      | 6.292512  | -1.276544 | -0.591511 |
| 2   | O      | 1.137858  | 1.100736  | -2.141697 | 67  | H      | 5.447687  | -2.637598 | 0.163588  |
| 3   | O      | 2.382822  | 2.965365  | 1.733918  | 68  | H      | 5.785523  | -1.176735 | 1.104403  |
| 4   | O      | 1.574601  | -1.172601 | 3.44984   | 69  | C      | 3.719314  | -1.549286 | -1.681592 |
| 5   | O      | 0.523564  | -1.56805  | -0.050394 | 70  | H      | 2.706237  | -1.249015 | -1.963996 |
| 6   | O      | -3.646578 | 0.475531  | -0.386941 | 71  | H      | 3.723045  | -2.643974 | -1.634178 |
| 7   | O      | -2.297976 | 2.16455   | -1.166621 | 72  | H      | 4.410191  | -1.246761 | -2.479082 |
| 8   | N      | 1.944651  | 1.073414  | 0.536587  | 73  | C      | -1.197359 | -2.156364 | -2.343772 |
| 9   | H      | 1.440298  | 0.193052  | 0.471565  | 74  | H      | -1.738216 | -1.759362 | -3.220492 |
| 10  | N      | 0.06109   | 0.234232  | 2.456786  | 75  | H      | -0.131201 | -1.972611 | -2.500122 |
| 11  | H      | -0.772518 | 0.257183  | 1.883998  | 76  | C      | -0.430719 | -4.404287 | -2.87798  |
| 12  | N      | -1.242373 | -1.986303 | 1.297586  | 77  | H      | -0.494287 | -4.284975 | -3.976902 |
| 13  | N      | -1.59079  | 0.061327  | -1.321942 | 78  | H      | -0.589811 | -5.462026 | -2.644687 |
| 14  | H      | -0.710193 | 0.488688  | -1.605141 | 79  | H      | 0.578658  | -4.133244 | -2.557206 |
| 15  | N      | -1.411004 | -3.594085 | -2.159928 | 80  | C      | -2.774028 | -4.000609 | -2.490924 |
| 16  | C      | 2.720441  | 1.76275   | -4.169836 | 81  | H      | -3.501101 | -3.409819 | -1.925942 |
| 17  | H      | 3.57499   | 2.086805  | -4.762853 | 82  | H      | -2.919684 | -5.053073 | -2.22788  |
| 18  | H      | 1.895834  | 2.473687  | -4.258514 | 83  | H      | -3.004089 | -3.878475 | -3.567263 |
| 19  | H      | 2.382319  | 0.774119  | -4.489222 |     |        |           |           |           |
| 20  | C      | 2.296884  | 1.36033   | -1.874133 |     |        |           |           |           |
| 21  | C      | 2.924873  | 1.393365  | -0.483231 |     |        |           |           |           |
| 22  | H      | 3.192747  | 2.443586  | -0.315541 |     |        |           |           |           |
| 23  | C      | 1.774872  | 1.898236  | 1.605705  |     |        |           |           |           |
| 24  | C      | 0.769004  | 1.46852   | 2.655054  |     |        |           |           |           |
| 25  | C      | 1.070013  | 1.889366  | 4.080213  |     |        |           |           |           |
| 26  | H      | 0.792104  | 1.18002   | 4.851069  |     |        |           |           |           |
| 27  | H      | 2.010261  | 2.408432  | 4.226679  |     |        |           |           |           |
| 28  | C      | -0.007337 | 2.598916  | 3.322884  |     |        |           |           |           |
| 29  | H      | 0.202769  | 3.598501  | 2.958691  |     |        |           |           |           |
| 30  | H      | -1.04256  | 2.386078  | 3.572614  |     |        |           |           |           |
| 31  | C      | 0.540183  | -0.996731 | 2.818277  |     |        |           |           |           |
| 32  | C      | -0.346594 | -2.196905 | 2.453713  |     |        |           |           |           |
| 33  | H      | 0.350125  | -3.013352 | 2.237439  |     |        |           |           |           |
| 34  | C      | -1.316661 | -2.577229 | 3.5938    |     |        |           |           |           |
| 35  | H      | -0.832079 | -3.218228 | 4.332852  |     |        |           |           |           |
| 36  | H      | -1.662594 | -1.673107 | 4.108554  |     |        |           |           |           |
| 37  | C      | -2.485698 | -3.251815 | 2.860435  |     |        |           |           |           |
| 38  | H      | -2.227596 | -4.287486 | 2.611769  |     |        |           |           |           |
| 39  | H      | -3.408548 | -3.26545  | 3.446787  |     |        |           |           |           |
| 40  | C      | -2.630951 | -2.426803 | 1.573623  |     |        |           |           |           |
| 41  | H      | -3.016105 | -3.022732 | 0.744674  |     |        |           |           |           |
| 42  | H      | -3.287862 | -1.560495 | 1.71031   |     |        |           |           |           |
| 43  | C      | -0.701122 | -1.699906 | 0.084026  |     |        |           |           |           |
| 44  | C      | -1.637892 | -1.376419 | -1.095692 |     |        |           |           |           |
| 45  | H      | -2.67367  | -1.607996 | -0.852334 |     |        |           |           |           |
| 46  | C      | -2.60817  | 0.873861  | -0.908714 |     |        |           |           |           |
| 47  | C      | -3.237811 | 3.264771  | -0.8773   |     |        |           |           |           |
| 48  | C      | -2.456881 | 4.495008  | -1.346991 |     |        |           |           |           |
| 49  | H      | -1.518594 | 4.592277  | -0.793072 |     |        |           |           |           |
| 50  | H      | -3.052794 | 5.398663  | -1.185384 |     |        |           |           |           |
| 51  | H      | -2.222296 | 4.418252  | -2.412821 |     |        |           |           |           |
| 52  | C      | -3.515019 | 3.342549  | 0.628231  |     |        |           |           |           |
| 53  | H      | -4.06647  | 2.4673    | 0.974946  |     |        |           |           |           |
| 54  | H      | -4.107421 | 4.238361  | 0.843085  |     |        |           |           |           |
| 55  | H      | -2.574523 | 3.419115  | 1.183837  |     |        |           |           |           |
| 56  | C      | -4.520743 | 3.090314  | -1.697599 |     |        |           |           |           |
| 57  | H      | -4.280925 | 2.992101  | -2.761441 |     |        |           |           |           |
| 58  | H      | -5.154792 | 3.974722  | -1.573185 |     |        |           |           |           |
| 59  | H      | -5.080502 | 2.210472  | -1.377038 |     |        |           |           |           |
| 60  | C      | 4.241918  | 0.583476  | -0.337444 |     |        |           |           |           |
| 61  | H      | 4.67579   | 0.908651  | 0.615009  |     |        |           |           |           |
| 62  | H      | 4.931281  | 0.907096  | -1.126584 |     |        |           |           |           |
| 63  | C      | 4.144734  | -0.955751 | -0.328558 |     |        |           |           |           |
| 64  | H      | 3.396795  | -1.248574 | 0.419108  |     |        |           |           |           |
| 65  | C      | 5.494989  | -1.544149 | 0.114017  |     |        |           |           |           |

**Calculation Type = FREQ**  
 Calculation Method = RB3LYP  
 Basis Set = 6-31+G(d,p)  
 Charge = 0  
 Spin = Singlet  
 E(RB3LYP) = -1818.39233242 a.u.  
 RMS Gradient Norm = 0.00010016 a.u.  
 Imaginary Freq =  
 Dipole Moment = 5.6562 Debye  
 Point Group = C1  
 Job cpu time: 6 days 22 hours 45 minutes 30.9 seconds.

**Calculation Type = SP**  
 Calculation Method = RM062X  
 Basis Set = 6-311++G(2d,3p)  
 Charge = 0  
 Spin = Singlet  
 E(RM062X) = -1818.11185055 a.u.  
 Dipole Moment = 5.6228 Debye  
 Point Group = C1  
 Job cpu time: 1 days 4 hours 39 minutes 13.2 seconds.

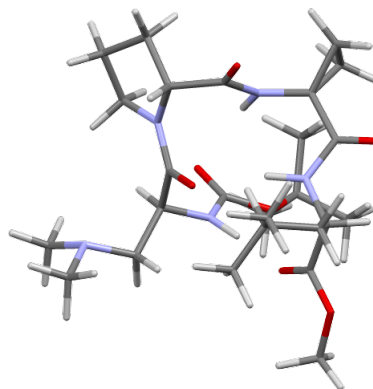

**Table S6.10:** Comparative Energy Data for **4a–e**

| Method                                                  |                                  | Boc-Dmaa-D-Pro-Acpc-Leu-Ome (4) |                 |                 |                 |                 |
|---------------------------------------------------------|----------------------------------|---------------------------------|-----------------|-----------------|-----------------|-----------------|
|                                                         |                                  | 4a                              | 4b              | 4c              | 4d              | 4e              |
| sp of X-ray crystal structure<br>M06-2X/6-311++G(2d,3p) | E(sp, M06-2X, au)                | -1817.585822240                 | -1817.751115040 | -1817.741115030 | -1817.751423580 | -1817.741043650 |
|                                                         | Relative E(sp, M06-2X, kcal/mol) | 103.92                          | 0.19            | 6.47            | 0.00            | 6.51            |
|                                                         | Dipole Moment (D)                | 9.687                           | 9.6794          | 10.5122         | 9.6553          | 9.989           |
| opt of X-ray crystal structure<br>B3LYP/6-31++G(d,p)    | E(opt, B3LYP, au)                | -1818.392437820                 | -1818.392438260 | -1818.392438340 | -1818.392438500 | -1818.392332420 |
|                                                         | ZP Correction (au)               | 0.714796                        | 0.714795        | 0.714795        | 0.714798        | 0.714856        |
|                                                         | E Correction (au)                | 0.757846                        | 0.757845        | 0.757847        | 0.757848        | 0.757761        |
|                                                         | H Correction (au)                | 0.758790                        | 0.758789        | 0.758791        | 0.758793        | 0.758705        |
|                                                         | G Correction (au)                | 0.635144                        | 0.635137        | 0.635128        | 0.635128        | 0.634436        |
|                                                         | ZPE (au)                         | -1817.677641820                 | -1817.677643260 | -1817.677643340 | -1817.677640500 | -1817.677476420 |
|                                                         | Relative ZPE (kcal/mol)          | 0.00                            | 0.00            | 0.00            | 0.00            | 0.10            |
|                                                         | E (au)                           | -1817.634591820                 | -1817.634593260 | -1817.634591340 | -1817.634590500 | -1817.634571420 |
|                                                         | Relative E (kcal/mol)            | 0.00                            | 0.00            | 0.00            | 0.00            | 0.01            |
|                                                         | H (au)                           | -1817.633647820                 | -1817.633649260 | -1817.633647340 | -1817.633645500 | -1817.633627420 |
|                                                         | Relative H (kcal/mol)            | 0.00                            | 0.00            | 0.00            | 0.00            | 0.01            |
|                                                         | G (au)                           | -1817.757293820                 | -1817.757301260 | -1817.757310340 | -1817.757310500 | -1817.757896420 |
|                                                         | Relative G (kcal/mol)            | 0.00                            | 0.00            | -0.01           | -0.01           | -0.38           |
| S (cal/mol*K)                                           | 260.234                          | 260.250                         | 260.270         | 260.274         | 261.547         |                 |
| Relative S(cal/mol*K)                                   | 0.00                             | 0.02                            | 0.04            | 0.04            | 1.31            |                 |
| Dipole Moment (D)                                       | 8.188                            | 8.189                           | 8.189           | 8.191           | 5.656           |                 |
| sp of optimized structure<br>M06-2X/6-311++G(2d,3p)     | E(sp, M06-2X, au)                | -1818.113669390                 | -1818.113663180 | -1818.113662940 | -1818.113671250 | -1818.111850550 |
|                                                         | ZPE (au)                         | -1817.398873390                 | -1817.398868180 | -1817.398867940 | -1817.398873250 | -1817.396994550 |
|                                                         | Relative ZPE (kcal/mol)          | 0.00                            | 0.00            | 0.00            | 0.00            | 1.18            |
|                                                         | E (au)                           | -1817.355823390                 | -1817.355818180 | -1817.355815940 | -1817.355823250 | -1817.354089550 |
|                                                         | Relative E (kcal/mol)            | 0.00                            | 0.00            | 0.00            | 0.00            | 1.09            |
|                                                         | H (au)                           | -1817.354879390                 | -1817.354874180 | -1817.354871940 | -1817.354878250 | -1817.353145550 |
|                                                         | Relative H (kcal/mol)            | 0.00                            | 0.00            | 0.00            | 0.00            | 1.09            |
|                                                         | G (au)                           | -1817.478525390                 | -1817.478526180 | -1817.478534940 | -1817.478543250 | -1817.477414550 |
| Relative G (kcal/mol)                                   | 0.00                             | 0.00                            | -0.01           | -0.01           | 0.70            |                 |
| Dipole Moment (D)                                       | 8.182                            | 8.184                           | 8.183           | 8.186           | 5.623           |                 |

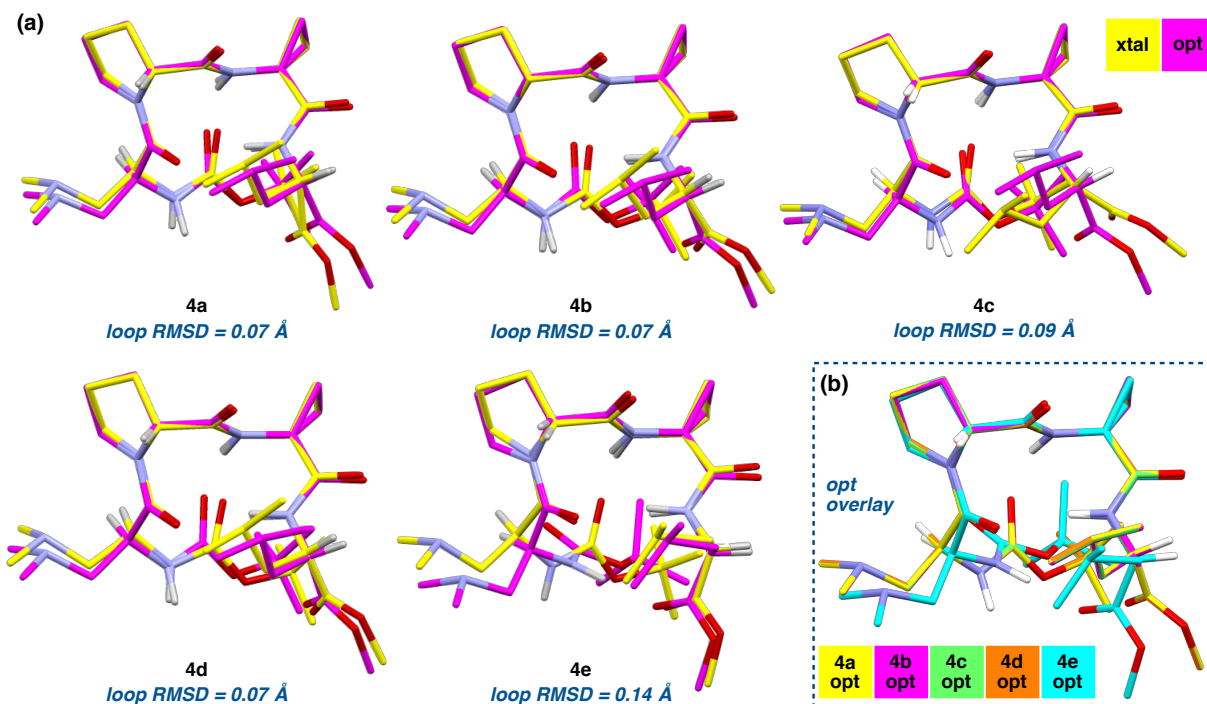

**Figure S6.02:** (a) Overlays of the DFT-optimized structures of **4a–e** with the corresponding crystal structures. (b) An overlay of the optimized structures shows that **4a–d** converged (loop RMSDs < 0.001 Å), while **4e** was a discrete conformer.

## D. Optimization of Peptide 7a,b

**Table S6.11: B3LYP/6-31+G(d,p)-Optimized Coordinates of 7a**

| Tag | Symbol | X         | Y         | Z         | Tag | Symbol | X        | Y         | Z         |
|-----|--------|-----------|-----------|-----------|-----|--------|----------|-----------|-----------|
| 1   | O      | -2.416299 | 4.470603  | 0.212378  | 63  | H      | 1.283889 | 0.8784    | -3.785372 |
| 2   | O      | -3.386963 | 2.848177  | 1.456112  | 64  | C      | 3.594919 | 2.37119   | -3.618576 |
| 3   | O      | -4.32789  | 0.911308  | -1.692655 | 65  | H      | 2.684295 | 2.966772  | -3.504994 |
| 4   | O      | -1.431023 | -2.521587 | -1.141081 | 66  | H      | 3.88496  | 2.377968  | -4.67377  |
| 5   | O      | -0.356121 | -0.22192  | 1.44637   | 67  | H      | 4.392548 | 2.842413  | -3.036076 |
| 6   | O      | 2.702931  | -1.117008 | -1.263358 | 68  | C      | 4.65114  | 0.111667  | -3.253122 |
| 7   | O      | 2.987556  | 1.115948  | -1.733103 | 69  | H      | 5.442744 | 0.570705  | -2.651431 |
| 8   | N      | -2.478467 | 0.877006  | -0.359761 | 70  | H      | 4.986822 | 0.090749  | -4.295491 |
| 9   | H      | -1.891256 | 0.360993  | 0.288854  | 71  | H      | 4.496314 | -0.913727 | -2.914811 |
| 10  | N      | -2.964888 | -1.769177 | 0.386836  |     |        |          |           |           |
| 11  | H      | -3.082154 | -1.542226 | 1.366149  |     |        |          |           |           |
| 12  | N      | 0.432688  | -2.32043  | 1.153902  |     |        |          |           |           |
| 13  | N      | 3.365805  | 1.16216   | 2.806962  |     |        |          |           |           |
| 14  | N      | 2.288323  | 0.507864  | 0.291192  |     |        |          |           |           |
| 15  | H      | 2.518381  | 1.459604  | 0.547248  |     |        |          |           |           |
| 16  | C      | -2.906464 | 5.459084  | 1.138232  |     |        |          |           |           |
| 17  | H      | -2.512565 | 5.271496  | 2.14017   |     |        |          |           |           |
| 18  | H      | -3.998377 | 5.439133  | 1.17186   |     |        |          |           |           |
| 19  | H      | -2.550695 | 6.415888  | 0.756892  |     |        |          |           |           |
| 20  | C      | -2.741819 | 3.18731   | 0.489048  |     |        |          |           |           |
| 21  | C      | -2.168276 | 2.263972  | -0.58337  |     |        |          |           |           |
| 22  | H      | -2.575692 | 2.573353  | -1.550049 |     |        |          |           |           |
| 23  | H      | -1.083126 | 2.404661  | -0.61263  |     |        |          |           |           |
| 24  | C      | -3.578961 | 0.309051  | -0.919787 |     |        |          |           |           |
| 25  | C      | -3.8633   | -1.129881 | -0.537352 |     |        |          |           |           |
| 26  | C      | -5.336912 | -1.501746 | -0.423969 |     |        |          |           |           |
| 27  | H      | -5.594202 | -2.204948 | 0.362518  |     |        |          |           |           |
| 28  | H      | -6.041349 | -0.695661 | -0.596723 |     |        |          |           |           |
| 29  | C      | -4.532508 | -1.993475 | -1.586135 |     |        |          |           |           |
| 30  | H      | -4.691069 | -1.51982  | -2.548399 |     |        |          |           |           |
| 31  | H      | -4.226046 | -3.03286  | -1.612236 |     |        |          |           |           |
| 32  | C      | -1.783548 | -2.359111 | 0.019941  |     |        |          |           |           |
| 33  | C      | -0.932935 | -2.874733 | 1.20077   |     |        |          |           |           |
| 34  | H      | -1.39994  | -2.584161 | 2.147985  |     |        |          |           |           |
| 35  | C      | -0.699425 | -4.39904  | 1.113462  |     |        |          |           |           |
| 36  | H      | -0.58544  | -4.804311 | 2.125628  |     |        |          |           |           |
| 37  | H      | -1.535704 | -4.915255 | 0.635485  |     |        |          |           |           |
| 38  | C      | 0.614749  | -4.525326 | 0.324681  |     |        |          |           |           |
| 39  | H      | 1.117663  | -5.482745 | 0.487837  |     |        |          |           |           |
| 40  | H      | 0.416591  | -4.40674  | -0.743253 |     |        |          |           |           |
| 41  | C      | 1.453468  | -3.342987 | 0.825583  |     |        |          |           |           |
| 42  | H      | 2.017926  | -3.612801 | 1.728717  |     |        |          |           |           |
| 43  | H      | 2.135627  | -2.957245 | 0.066765  |     |        |          |           |           |
| 44  | C      | 0.609191  | -0.990646 | 1.308091  |     |        |          |           |           |
| 45  | C      | 2.047543  | -0.425172 | 1.377885  |     |        |          |           |           |
| 46  | H      | 2.772169  | -1.24086  | 1.31378   |     |        |          |           |           |
| 47  | C      | 2.179876  | 0.314632  | 2.727249  |     |        |          |           |           |
| 48  | H      | 1.297936  | 0.950601  | 2.8434    |     |        |          |           |           |
| 49  | H      | 2.149865  | -0.440852 | 3.536808  |     |        |          |           |           |
| 50  | C      | 3.283979  | 2.08123   | 3.940195  |     |        |          |           |           |
| 51  | H      | 2.37176   | 2.680695  | 3.867893  |     |        |          |           |           |
| 52  | H      | 4.141683  | 2.760516  | 3.922174  |     |        |          |           |           |
| 53  | H      | 3.279126  | 1.560281  | 4.916778  |     |        |          |           |           |
| 54  | C      | 4.612868  | 0.402184  | 2.830685  |     |        |          |           |           |
| 55  | H      | 4.681884  | -0.272085 | 3.706299  |     |        |          |           |           |
| 56  | H      | 5.459855  | 1.093496  | 2.86477   |     |        |          |           |           |
| 57  | H      | 4.71252   | -0.19976  | 1.923528  |     |        |          |           |           |
| 58  | C      | 2.668499  | 0.066173  | -0.943878 |     |        |          |           |           |
| 59  | C      | 3.360664  | 0.931945  | -3.152226 |     |        |          |           |           |
| 60  | C      | 2.198919  | 0.292925  | -3.919509 |     |        |          |           |           |
| 61  | H      | 2.014192  | -0.729164 | -3.586487 |     |        |          |           |           |
| 62  | H      | 2.437108  | 0.27589   | -4.988421 |     |        |          |           |           |

### Calculation Type = FREQ

Calculation Method = RB3LYP

Basis Set = 6-31+G(d,p)

Charge = 0

Spin = Singlet

E(RB3LYP) = -1661.12003269 a.u.

RMS Gradient Norm = 0.00000278 a.u.

Imaginary Freq = 0

Dipole Moment = 7.2557 Debye

Point Group = C1

Job cpu time: 2 days 20 hours 39 minutes 12.6 seconds.

### Calculation Type = SP

Calculation Method = RM062X

Basis Set = 6-311++G(2d,3p)

Charge = 0

Spin = Singlet

E(RM062X) = -1660.87600910 a.u.

Dipole Moment = 7.2674 Debye

Point Group = C1

Job cpu time: 0 days 11 hours 55 minutes 23.5 seconds.

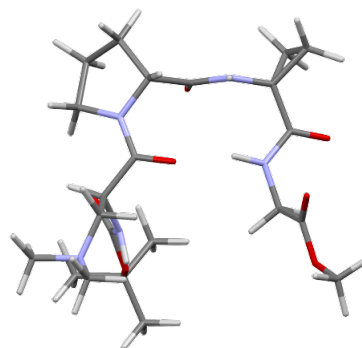

**Table S6.12: B3LYP/6-31+G(d,p)-Optimized Coordinates of 7b**

| Tag | Symbol | X         | Y         | Z         | Tag | Symbol | X         | Y         | Z        |
|-----|--------|-----------|-----------|-----------|-----|--------|-----------|-----------|----------|
| 1   | O      | -3.395104 | -2.757253 | -2.751483 | 66  | H      | -0.26906  | -1.955016 | 5.078851 |
| 2   | O      | -2.303499 | -2.401288 | -0.803459 | 67  | H      | 0.533564  | -0.704704 | 4.107967 |
| 3   | O      | -4.231176 | 0.698629  | -0.285113 | 68  | C      | -1.574398 | -1.752373 | 2.602054 |
| 4   | O      | -1.327421 | 3.928643  | -1.186744 | 69  | H      | -1.502959 | -0.664879 | 2.576515 |
| 5   | O      | 0.821295  | 0.623476  | -1.750062 | 70  | H      | -2.318118 | -2.0326   | 3.356151 |
| 6   | O      | 0.731906  | 0.022886  | 1.717722  | 71  | H      | -1.920025 | -2.103376 | 1.626099 |
| 7   | O      | 0.722257  | -2.273834 | 1.838036  |     |        |           |           |          |
| 8   | N      | -2.241948 | 0.403025  | -1.351157 |     |        |           |           |          |
| 9   | H      | -1.245491 | 0.592788  | -1.385777 |     |        |           |           |          |
| 10  | N      | -0.972192 | 2.237316  | 0.319081  |     |        |           |           |          |
| 11  | H      | -0.289864 | 1.597828  | 0.721246  |     |        |           |           |          |
| 12  | N      | 1.77011   | 2.158124  | -0.378677 |     |        |           |           |          |
| 13  | N      | 4.145473  | -1.952877 | -1.281304 |     |        |           |           |          |
| 14  | N      | 1.914318  | -1.273496 | 0.256442  |     |        |           |           |          |
| 15  | H      | 2.240086  | -2.207373 | 0.036455  |     |        |           |           |          |
| 16  | C      | -3.47145  | -4.161536 | -2.442276 |     |        |           |           |          |
| 17  | H      | -4.036812 | -4.316392 | -1.520188 |     |        |           |           |          |
| 18  | H      | -2.469437 | -4.581978 | -2.325981 |     |        |           |           |          |
| 19  | H      | -3.984636 | -4.617469 | -3.288541 |     |        |           |           |          |
| 20  | C      | -2.785332 | -1.977458 | -1.831187 |     |        |           |           |          |
| 21  | C      | -2.792114 | -0.525193 | -2.302723 |     |        |           |           |          |
| 22  | H      | -2.225688 | -0.471469 | -3.237926 |     |        |           |           |          |
| 23  | H      | -3.828268 | -0.252177 | -2.522514 |     |        |           |           |          |
| 24  | C      | -3.03121  | 0.961812  | -0.393075 |     |        |           |           |          |
| 25  | C      | -2.361709 | 1.941425  | 0.549222  |     |        |           |           |          |
| 26  | C      | -2.833518 | 1.90339   | 1.996789  |     |        |           |           |          |
| 27  | H      | -2.072472 | 2.076625  | 2.751389  |     |        |           |           |          |
| 28  | H      | -3.577095 | 1.149858  | 2.232624  |     |        |           |           |          |
| 29  | C      | -3.242359 | 3.038612  | 1.112464  |     |        |           |           |          |
| 30  | H      | -2.768406 | 4.004702  | 1.241083  |     |        |           |           |          |
| 31  | H      | -4.262552 | 3.05395   | 0.746112  |     |        |           |           |          |
| 32  | C      | -0.56956  | 3.159546  | -0.604139 |     |        |           |           |          |
| 33  | C      | 0.938119  | 3.244904  | -0.922524 |     |        |           |           |          |
| 34  | H      | 0.985043  | 3.229812  | -2.014328 |     |        |           |           |          |
| 35  | C      | 1.586449  | 4.511507  | -0.329629 |     |        |           |           |          |
| 36  | H      | 2.406844  | 4.838798  | -0.978414 |     |        |           |           |          |
| 37  | H      | 0.869269  | 5.331019  | -0.254277 |     |        |           |           |          |
| 38  | C      | 2.132521  | 4.031765  | 1.024752  |     |        |           |           |          |
| 39  | H      | 1.327487  | 3.993328  | 1.766478  |     |        |           |           |          |
| 40  | H      | 2.923253  | 4.673814  | 1.422153  |     |        |           |           |          |
| 41  | C      | 2.640554  | 2.611105  | 0.730833  |     |        |           |           |          |
| 42  | H      | 3.690041  | 2.627702  | 0.409254  |     |        |           |           |          |
| 43  | H      | 2.540166  | 1.944074  | 1.589827  |     |        |           |           |          |
| 44  | C      | 1.657275  | 0.90395   | -0.881293 |     |        |           |           |          |
| 45  | C      | 2.631307  | -0.180381 | -0.373994 |     |        |           |           |          |
| 46  | H      | 3.339588  | 0.260346  | 0.335532  |     |        |           |           |          |
| 47  | C      | 3.390003  | -0.741535 | -1.595344 |     |        |           |           |          |
| 48  | H      | 2.643118  | -0.987521 | -2.354416 |     |        |           |           |          |
| 49  | H      | 4.034365  | 0.058627  | -2.007083 |     |        |           |           |          |
| 50  | C      | 5.327621  | -1.692992 | -0.462511 |     |        |           |           |          |
| 51  | H      | 6.057792  | -1.03338  | -0.969575 |     |        |           |           |          |
| 52  | H      | 5.825307  | -2.638779 | -0.229698 |     |        |           |           |          |
| 53  | H      | 5.043836  | -1.226471 | 0.484928  |     |        |           |           |          |
| 54  | C      | 4.493191  | -2.696124 | -2.491598 |     |        |           |           |          |
| 55  | H      | 3.585883  | -2.935324 | -3.05345  |     |        |           |           |          |
| 56  | H      | 4.981417  | -3.635335 | -2.214606 |     |        |           |           |          |
| 57  | H      | 5.177099  | -2.136391 | -3.157048 |     |        |           |           |          |
| 58  | C      | 1.081174  | -1.090539 | 1.315111  |     |        |           |           |          |
| 59  | C      | -0.233033 | -2.392448 | 2.965771  |     |        |           |           |          |
| 60  | C      | -0.376081 | -3.90991  | 3.106299  |     |        |           |           |          |
| 61  | H      | -0.791492 | -4.34152  | 2.191214  |     |        |           |           |          |
| 62  | H      | -1.048398 | -4.142979 | 3.937721  |     |        |           |           |          |
| 63  | H      | 0.594928  | -4.374779 | 3.303697  |     |        |           |           |          |
| 64  | C      | 0.392     | -1.780857 | 4.223181  |     |        |           |           |          |
| 65  | H      | 1.358595  | -2.24811  | 4.439587  |     |        |           |           |          |

**Calculation Type = FREQ**

Calculation Method = RB3LYP  
 Basis Set = 6-31+G(d,p)  
 Charge = 0  
 Spin = Singlet  
 E(RB3LYP) = -1661.12599990 a.u.  
 RMS Gradient Norm = 0.00000368 a.u.  
 Imaginary Freq = 0  
 Dipole Moment = 9.2507 Debye  
 Point Group = C1  
 Job cpu time: 3 days 7 hours 3 minutes 8.3 seconds.

**Calculation Type = SP**

Calculation Method = RM062X  
 Basis Set = 6-311++G(2d,3p)  
 Charge = 0  
 Spin = Singlet  
 E(RM062X) = -1660.88689919 a.u.  
 Dipole Moment = 9.2029 Debye  
 Point Group = C1  
 Job cpu time: 0 days 19 hours 21 minutes 23.1 seconds.

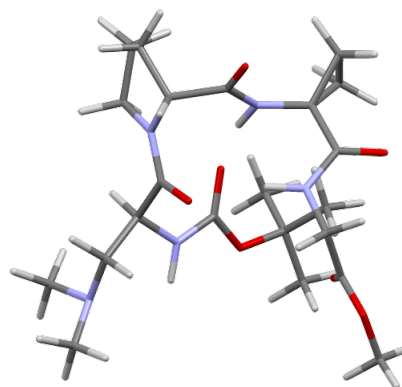

**Table S6.13:** Comparative Energy Data for **7a,b**

| Method                                                  |                                  | Boc-Dmaa-D-Pro-Acpc-Gly-Ome (7) |                 |
|---------------------------------------------------------|----------------------------------|---------------------------------|-----------------|
|                                                         |                                  | 7a                              | 7b              |
| sp of X-ray crystal structure<br>M06-2X/6-311++G(2d,3p) | E(sp, M06-2X, au)                | -1660.520970810                 | -1660.491425800 |
|                                                         | Relative E(sp, M06-2X, kcal/mol) | 0.00                            | 18.54           |
|                                                         | Dipole Moment (D)                | 7.912                           | 8.906           |
| opt of X-ray crystal structure<br>B3LYP/6-31+G(d,p)     | E(opt, B3LYP, au)                | -1661.120032690                 | -1661.125999900 |
|                                                         | ZP Correction (au)               | 0.601558                        | 0.602213        |
|                                                         | E Correction (au)                | 0.639248                        | 0.639432        |
|                                                         | H Correction (au)                | 0.640192                        | 0.640376        |
|                                                         | G Correction (au)                | 0.525694                        | 0.529866        |
|                                                         | ZPE (au)                         | -1660.518474690                 | -1660.523786900 |
|                                                         | Relative ZPE (kcal/mol)          | 3.33                            | 0.00            |
|                                                         | E (au)                           | -1660.480784690                 | -1660.486567900 |
|                                                         | Relative E (kcal/mol)            | 3.63                            | 0.00            |
|                                                         | H (au)                           | -1660.479840690                 | -1660.485623900 |
|                                                         | Relative H (kcal/mol)            | 3.33                            | 0.00            |
|                                                         | G (au)                           | -1660.594338690                 | -1660.596133900 |
|                                                         | Relative G (kcal/mol)            | 3.33                            | 0.00            |
|                                                         | S (cal/mol*K)                    | 240.982                         | 232.588         |
| Relative S(cal/mol*K)                                   | 0.00                             | -8.39                           |                 |
| Dipole Moment (D)                                       | 7.256                            | 9.251                           |                 |
| sp of optimized structure<br>M06-2X/6-311++G(2d,3p)     | E(sp, M06-2X, au)                | -1660.876009100                 | -1660.886899190 |
|                                                         | ZPE (au)                         | -1660.274451100                 | -1660.284686190 |
|                                                         | Relative ZPE (kcal/mol)          | 6.42                            | 0.00            |
|                                                         | E (au)                           | -1660.236761100                 | -1660.247467190 |
|                                                         | Relative E (kcal/mol)            | 6.72                            | 0.00            |
|                                                         | H (au)                           | -1660.235817100                 | -1660.246523190 |
|                                                         | Relative H (kcal/mol)            | 6.72                            | 0.00            |
|                                                         | G (au)                           | -1660.350315100                 | -1660.357033190 |
| Relative G (kcal/mol)                                   | 4.22                             | 0.00                            |                 |
| Dipole Moment (D)                                       | 7.267                            | 9.203                           |                 |

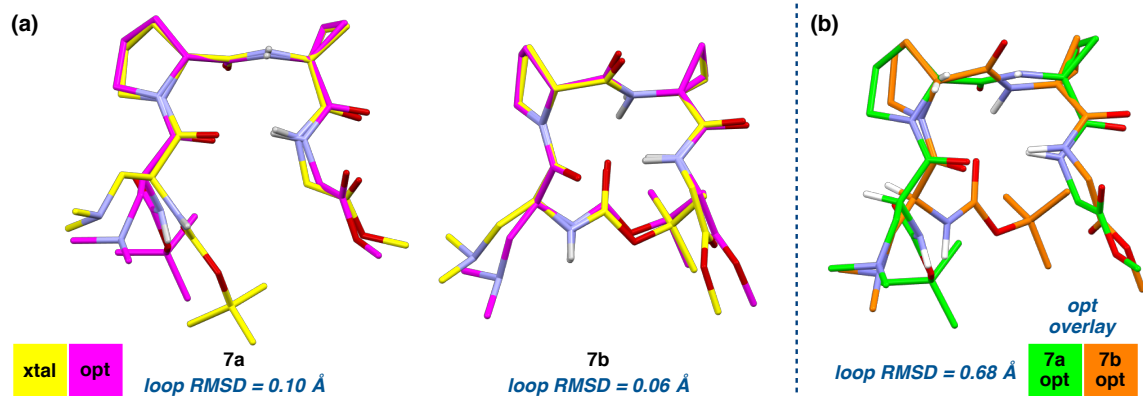

**Figure S6.03:** (a) Overlays of DFT-optimized structures of **7a,b** with the corresponding crystal structures. (b) Overlay of the optimized structures of **7a** and **7b**.



## E. Optimization of Peptide 15

**Table S6.14:** B3LYP/6-31+G(d,p)-Optimized Coordinates of 15

| Tag | Symbol | X         | Y         | Z         | Tag | Symbol | X         | Y         | Z         |
|-----|--------|-----------|-----------|-----------|-----|--------|-----------|-----------|-----------|
| 1   | O      | 0.740287  | -3.016366 | -1.977885 | 63  | H      | -6.463166 | 0.109396  | 0.351159  |
| 2   | O      | -0.431123 | -2.497986 | -0.120751 | 64  | C      | -5.931164 | -0.157191 | -2.366715 |
| 3   | O      | 4.622126  | -1.732047 | -0.962051 | 65  | H      | -5.887763 | 0.881003  | -2.034815 |
| 4   | O      | 2.958037  | 2.249505  | 0.568163  | 66  | H      | -6.941912 | -0.369169 | -2.732252 |
| 5   | O      | 0.131074  | 0.656575  | -0.950604 | 67  | H      | -5.233624 | -0.293669 | -3.199946 |
| 6   | O      | -4.359848 | 1.228165  | -0.169876 | 68  | C      | 0.633897  | -2.631594 | -0.695398 |
| 7   | O      | -4.177024 | -0.964998 | -0.833999 | 69  | C      | -0.499088 | -3.214351 | -2.689195 |
| 8   | N      | 2.471979  | -1.071203 | -0.567872 | 70  | H      | -1.103053 | -3.978076 | -2.194022 |
| 9   | H      | 1.786111  | -0.322903 | -0.632572 | 71  | H      | -0.208318 | -3.53869  | -3.687812 |
| 10  | N      | 3.003929  | 1.491689  | -1.59613  | 72  | H      | -1.061362 | -2.278805 | -2.733661 |
| 11  | H      | 2.421613  | 1.408699  | -2.41973  | 73  | C      | -1.190845 | 0.76996   | 2.032151  |
| 12  | N      | 0.082288  | 2.767112  | -0.160855 | 74  | H      | -0.570152 | -0.127942 | 1.949384  |
| 13  | N      | -2.382349 | 0.076385  | -0.036518 | 75  | H      | -0.539665 | 1.577017  | 2.424831  |
| 14  | H      | -1.929726 | -0.823343 | -0.159304 | 76  | C      | -1.846738 | -0.28374  | 4.09646   |
| 15  | N      | -2.295811 | 0.474358  | 2.93309   | 77  | H      | -1.353721 | -1.204687 | 3.771909  |
| 16  | C      | 4.183357  | -3.567334 | 1.944138  | 78  | H      | -2.711481 | -0.559527 | 4.707904  |
| 17  | H      | 5.116259  | -3.485448 | 2.513354  | 79  | H      | -1.141216 | 0.281638  | 4.737059  |
| 18  | H      | 3.684744  | -4.494421 | 2.257673  | 80  | C      | -3.051305 | 1.658532  | 3.326846  |
| 19  | H      | 4.455296  | -3.652829 | 0.888636  | 81  | H      | -2.429029 | 2.402049  | 3.865338  |
| 20  | C      | 3.284247  | -2.348297 | 2.204571  | 82  | H      | -3.870318 | 1.360956  | 3.988155  |
| 21  | H      | 3.810392  | -1.454136 | 1.846481  | 83  | H      | -3.499555 | 2.138154  | 2.452943  |
| 22  | C      | 1.936169  | -2.441144 | 1.463566  |     |        |           |           |           |
| 23  | H      | 1.273388  | -1.639167 | 1.807475  |     |        |           |           |           |
| 24  | H      | 1.440334  | -3.383309 | 1.735092  |     |        |           |           |           |
| 25  | C      | 2.010956  | -2.367934 | -0.071619 |     |        |           |           |           |
| 26  | H      | 2.708619  | -3.112874 | -0.462996 |     |        |           |           |           |
| 27  | C      | 3.74959   | -0.8607   | -0.977385 |     |        |           |           |           |
| 28  | C      | 4.076471  | 0.540256  | -1.467131 |     |        |           |           |           |
| 29  | C      | 5.186168  | 0.633427  | -2.505515 |     |        |           |           |           |
| 30  | H      | 5.61073   | -0.311151 | -2.826735 |     |        |           |           |           |
| 31  | H      | 5.063642  | 1.393058  | -3.27172  |     |        |           |           |           |
| 32  | C      | 5.447583  | 1.075428  | -1.099969 |     |        |           |           |           |
| 33  | H      | 5.501344  | 2.13617   | -0.882634 |     |        |           |           |           |
| 34  | H      | 6.050945  | 0.430964  | -0.470693 |     |        |           |           |           |
| 35  | C      | 2.493286  | 2.233037  | -0.564725 |     |        |           |           |           |
| 36  | C      | 1.285341  | 3.118989  | -0.94518  |     |        |           |           |           |
| 37  | H      | 1.052204  | 2.996577  | -2.010702 |     |        |           |           |           |
| 38  | C      | 1.528083  | 4.59882   | -0.589251 |     |        |           |           |           |
| 39  | H      | 2.214395  | 4.645747  | 0.262005  |     |        |           |           |           |
| 40  | H      | 1.97131   | 5.14877   | -1.423464 |     |        |           |           |           |
| 41  | C      | 0.140419  | 5.121041  | -0.18473  |     |        |           |           |           |
| 42  | H      | 0.189502  | 6.015821  | 0.44157   |     |        |           |           |           |
| 43  | H      | -0.45815  | 5.359911  | -1.071202 |     |        |           |           |           |
| 44  | C      | 3.032644  | -2.170917 | 3.710987  |     |        |           |           |           |
| 45  | H      | 3.977498  | -2.0809   | 4.258297  |     |        |           |           |           |
| 46  | H      | 2.439977  | -1.271977 | 3.915673  |     |        |           |           |           |
| 47  | H      | 2.490894  | -3.032112 | 4.123665  |     |        |           |           |           |
| 48  | C      | -0.476444 | 3.928774  | 0.556417  |     |        |           |           |           |
| 49  | H      | -0.165395 | 3.911677  | 1.608293  |     |        |           |           |           |
| 50  | H      | -1.567598 | 3.926013  | 0.515403  |     |        |           |           |           |
| 51  | C      | -0.421134 | 1.512664  | -0.240561 |     |        |           |           |           |
| 52  | C      | -1.654753 | 1.147789  | 0.599777  |     |        |           |           |           |
| 53  | H      | -2.342447 | 1.993467  | 0.642718  |     |        |           |           |           |
| 54  | C      | -3.705656 | 0.201251  | -0.32832  |     |        |           |           |           |
| 55  | C      | -5.589496 | -1.119347 | -1.22312  |     |        |           |           |           |
| 56  | C      | -5.642319 | -2.572381 | -1.703995 |     |        |           |           |           |
| 57  | H      | -4.963718 | -2.724148 | -2.548994 |     |        |           |           |           |
| 58  | H      | -6.658173 | -2.823619 | -2.024829 |     |        |           |           |           |
| 59  | H      | -5.351291 | -3.254892 | -0.899951 |     |        |           |           |           |
| 60  | C      | -6.498133 | -0.921179 | -0.004485 |     |        |           |           |           |
| 61  | H      | -6.193078 | -1.588066 | 0.808436  |     |        |           |           |           |
| 62  | H      | -7.5306   | -1.165544 | -0.277121 |     |        |           |           |           |

### Calculation Type = FREQ

Calculation Method = RB3LYP

Basis Set = 6-31+G(d,p)

Charge = 0

Spin = Singlet

E(RB3LYP) = -1818.38899011 a.u.

RMS Gradient Norm = 0.00000230 a.u.

Imaginary Freq = 0

Dipole Moment = 4.8298 Debye

Point Group = C1

Job cpu time: 5 days 2 hours 58 minutes 12.9 seconds.

### Calculation Type = SP

Calculation Method = RM062X

Basis Set = 6-311++G(2d,3p)

Charge = 0

Spin = Singlet

E(RM062X) = -1818.10654798 a.u.

Dipole Moment = 4.7547 Debye

Point Group = C1

Job cpu time: 1 days 6 hours 26 minutes 55.3 seconds.

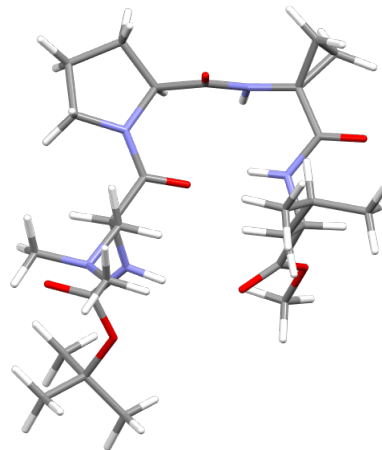

## F. Optimization of Peptide 16a-c

**Table S6.15:** B3LYP/6-31+G(d,p)-Optimized Coordinates of 16a

| Tag | Symbol | X         | Y         | Z         | Tag | Symbol | X         | Y         | Z         |
|-----|--------|-----------|-----------|-----------|-----|--------|-----------|-----------|-----------|
| 1   | O      | 0.281707  | 2.01012   | 0.887747  | 63  | H      | 5.92242   | 2.408898  | 0.822049  |
| 2   | O      | -4.092797 | 1.49178   | -1.119025 | 64  | H      | 7.023396  | 2.433278  | -0.567291 |
| 3   | O      | -1.050153 | -1.077737 | -2.650375 | 65  | H      | 6.389713  | 0.884822  | 0.032421  |
| 4   | O      | -0.362073 | -1.47972  | 0.973668  | 66  | C      | -2.082933 | 1.641612  | 2.370626  |
| 5   | O      | 3.72862   | 1.572525  | -0.461666 | 67  | H      | -1.284685 | 0.925488  | 2.588632  |
| 6   | O      | 4.480174  | -0.586835 | -0.247838 | 68  | H      | -1.786673 | 2.586509  | 2.846907  |
| 7   | N      | -2.392127 | 0.624328  | 0.126874  | 69  | C      | -3.407685 | 1.157446  | 2.991571  |
| 8   | H      | -1.782399 | -0.169289 | 0.322037  | 70  | H      | -3.709991 | 0.239794  | 2.467888  |
| 9   | N      | -2.609173 | -1.835597 | -1.163832 | 71  | C      | -4.544691 | 2.182951  | 2.849564  |
| 10  | H      | -2.726198 | -2.401629 | -0.333579 | 72  | H      | -4.270378 | 3.135387  | 3.32217   |
| 11  | N      | 0.782798  | -2.46212  | -0.705392 | 73  | H      | -5.455992 | 1.822422  | 3.340121  |
| 12  | N      | 2.392569  | 0.045712  | 0.463923  | 74  | H      | -4.79589  | 2.383153  | 1.803282  |
| 13  | H      | 1.74074   | 0.824304  | 0.575031  | 75  | C      | -3.185434 | 0.798972  | 4.470024  |
| 14  | N      | -0.742565 | 3.407587  | -0.583802 | 76  | H      | -2.405303 | 0.038101  | 4.584032  |
| 15  | C      | 0.541546  | 3.969611  | -0.997124 | 77  | H      | -4.103842 | 0.411252  | 4.925147  |
| 16  | H      | 1.330571  | 3.584568  | -0.354919 | 78  | H      | -2.877262 | 1.681675  | 5.045068  |
| 17  | H      | 0.502622  | 5.063083  | -0.926547 | 79  | C      | 1.961469  | -1.1974   | 2.575582  |
| 18  | H      | 0.757318  | 3.695238  | -2.03694  | 80  | H      | 2.825334  | -0.627457 | 2.95988   |
| 19  | C      | -1.900499 | 3.953745  | -1.292827 | 81  | H      | 1.05533   | -0.649455 | 2.843432  |
| 20  | H      | -2.783583 | 3.326735  | -1.185452 | 82  | C      | 1.091526  | -2.613308 | 4.3552    |
| 21  | H      | -1.662421 | 4.003654  | -2.360848 | 83  | H      | 1.519107  | -2.023885 | 5.190148  |
| 22  | H      | -2.120498 | 4.971777  | -0.944872 | 84  | H      | 1.012632  | -3.65447  | 4.68573   |
| 23  | C      | -0.762374 | 2.443119  | 0.375673  | 85  | H      | 0.083091  | -2.244033 | 4.149709  |
| 24  | C      | -2.118543 | 1.870262  | 0.848695  | 86  | C      | 3.215925  | -3.132602 | 3.34128   |
| 25  | H      | -2.931728 | 2.548111  | 0.598978  | 87  | H      | 3.796864  | -3.098986 | 2.415156  |
| 26  | C      | -3.370112 | 0.536884  | -0.8089   | 88  | H      | 3.114433  | -4.18194  | 3.63678   |
| 27  | C      | -3.634824 | -0.842485 | -1.443135 | 89  | H      | 3.798251  | -2.607478 | 4.12396   |
| 28  | C      | -5.081216 | -1.332255 | -1.08533  | 90  | N      | 1.894332  | -2.547321 | 3.13952   |
| 29  | H      | -5.096739 | -2.419558 | -0.958822 |     |        |           |           |           |
| 30  | H      | -5.548432 | -0.860244 | -0.217455 |     |        |           |           |           |
| 31  | C      | -5.570387 | -0.88379  | -2.487931 |     |        |           |           |           |
| 32  | H      | -6.177732 | -1.606163 | -3.040546 |     |        |           |           |           |
| 33  | H      | -6.09071  | 0.074791  | -2.451902 |     |        |           |           |           |
| 34  | C      | -4.092656 | -0.73     | -2.932493 |     |        |           |           |           |
| 35  | H      | -3.817804 | 0.196423  | -3.436494 |     |        |           |           |           |
| 36  | H      | -3.723337 | -1.580215 | -3.509594 |     |        |           |           |           |
| 37  | C      | -1.38506  | -1.861225 | -1.766039 |     |        |           |           |           |
| 38  | C      | -0.457778 | -2.997523 | -1.288614 |     |        |           |           |           |
| 39  | H      | -0.975304 | -3.59656  | -0.531171 |     |        |           |           |           |
| 40  | C      | 0.043147  | -3.867622 | -2.464045 |     |        |           |           |           |
| 41  | H      | 0.179505  | -4.89745  | -2.114999 |     |        |           |           |           |
| 42  | H      | -0.665993 | -3.882141 | -3.295117 |     |        |           |           |           |
| 43  | C      | 1.39569   | -3.240758 | -2.842481 |     |        |           |           |           |
| 44  | H      | 1.23008   | -2.359788 | -3.468017 |     |        |           |           |           |
| 45  | H      | 2.05178   | -3.934413 | -3.375784 |     |        |           |           |           |
| 46  | C      | 1.982537  | -2.816911 | -1.491535 |     |        |           |           |           |
| 47  | H      | 2.516088  | -3.648102 | -1.010356 |     |        |           |           |           |
| 48  | H      | 2.667381  | -1.971919 | -1.567346 |     |        |           |           |           |
| 49  | C      | 0.729003  | -1.747367 | 0.441861  |     |        |           |           |           |
| 50  | C      | 2.058386  | -1.248953 | 1.041582  |     |        |           |           |           |
| 51  | H      | 2.867057  | -1.924168 | 0.75985   |     |        |           |           |           |
| 52  | C      | 3.614658  | 0.271466  | -0.093173 |     |        |           |           |           |
| 53  | C      | 4.958264  | 2.082003  | -1.095219 |     |        |           |           |           |
| 54  | C      | 4.628405  | 3.56097   | -1.317576 |     |        |           |           |           |
| 55  | H      | 3.76052   | 3.668569  | -1.975225 |     |        |           |           |           |
| 56  | H      | 5.479944  | 4.068281  | -1.78169  |     |        |           |           |           |
| 57  | H      | 4.406499  | 4.053959  | -0.366271 |     |        |           |           |           |
| 58  | C      | 5.1967    | 1.376242  | -2.43516  |     |        |           |           |           |
| 59  | H      | 5.432524  | 0.321476  | -2.288974 |     |        |           |           |           |
| 60  | H      | 6.033177  | 1.855487  | -2.955438 |     |        |           |           |           |
| 61  | H      | 4.309321  | 1.458405  | -3.071544 |     |        |           |           |           |
| 62  | C      | 6.147359  | 1.934338  | -0.1388   |     |        |           |           |           |

### Calculation Type = FREQ

Calculation Method = RB3LYP

Basis Set = 6-31+G(d,p)

Charge = 0

Spin = Singlet

E(RB3LYP) = -1877.16009531 a.u.

RMS Gradient Norm = 0.00000509 a.u.

Imaginary Freq = 0

Dipole Moment = 1.3233 Debye

Point Group = C1

Job cpu time: 7 days 15 hours 46 minutes 12.3 seconds.

### Calculation Type = SP

Calculation Method = RM062X

Basis Set = 6-311++G(2d,3p)

Charge = 0

Spin = Singlet

E(RM062X) = -1876.84766105 a.u.

Dipole Moment = 1.3218 Debye

Point Group = C1

Job cpu time: 1 days 14 hours 2 minutes 1.4 seconds.

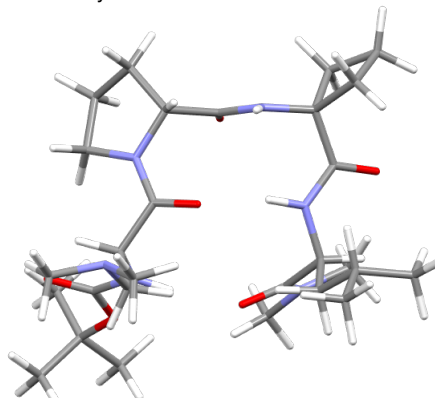

**Table S6.16:** B3LYP/6-31+G(d,p)-Optimized Coordinates of **16b**

| Tag | Symbol | X         | Y         | Z         | Tag | Symbol | X         | Y         | Z         |
|-----|--------|-----------|-----------|-----------|-----|--------|-----------|-----------|-----------|
| 1   | O      | 0.330406  | -1.744351 | 0.907338  | 66  | C      | -1.945576 | -3.010025 | -0.138074 |
| 2   | O      | -4.381417 | -0.422652 | 1.618737  | 67  | H      | -1.495362 | -3.879839 | 0.359675  |
| 3   | O      | -1.72747  | 2.601516  | 1.064655  | 68  | H      | -1.230202 | -2.693275 | -0.903459 |
| 4   | O      | -0.627431 | 0.421815  | -1.905522 | 69  | C      | -3.269154 | -3.435756 | -0.803291 |
| 5   | O      | 3.990873  | -0.184972 | 1.183577  | 70  | H      | -3.733826 | -2.538655 | -1.236081 |
| 6   | O      | 4.370049  | 0.960969  | -0.771765 | 71  | C      | -2.979095 | -4.411762 | -1.95529  |
| 7   | N      | -2.536691 | -0.631817 | 0.295243  | 72  | H      | -2.305585 | -3.967309 | -2.696658 |
| 8   | H      | -1.961413 | -0.228174 | -0.442175 | 73  | H      | -3.902556 | -4.700723 | -2.469671 |
| 9   | N      | -2.943064 | 1.929628  | -0.7496   | 74  | H      | -2.506397 | -5.329525 | -1.582241 |
| 10  | H      | -2.831251 | 1.669583  | -1.721823 | 75  | C      | -4.265464 | -4.053511 | 0.191953  |
| 11  | N      | 0.454815  | 2.230803  | -1.097917 | 76  | H      | -3.832086 | -4.937588 | 0.678128  |
| 12  | N      | 2.333082  | 0.022015  | -0.287998 | 77  | H      | -5.17752  | -4.375033 | -0.323544 |
| 13  | H      | 1.847433  | -0.628811 | 0.328914  | 78  | H      | -4.56482  | -3.346278 | 0.971532  |
| 14  | N      | -0.67225  | -1.262821 | 2.88881   | 79  | C      | 1.601741  | -1.144768 | -2.360703 |
| 15  | C      | -1.819018 | -0.887623 | 3.71641   | 80  | H      | 0.928469  | -1.766847 | -1.766514 |
| 16  | H      | -1.704337 | 0.153683  | 4.040421  | 81  | H      | 1.097336  | -0.951627 | -3.325624 |
| 17  | H      | -1.859116 | -1.526028 | 4.607218  | 82  | C      | 2.638728  | -3.279814 | -2.784149 |
| 18  | H      | -2.761183 | -0.960072 | 3.17832   | 83  | H      | 2.061679  | -3.713928 | -1.96245  |
| 19  | C      | 0.626861  | -1.016331 | 3.512447  | 84  | H      | 3.601225  | -3.799065 | -2.835468 |
| 20  | H      | 1.408384  | -1.520282 | 2.946812  | 85  | H      | 2.095899  | -3.47407  | -3.731026 |
| 21  | H      | 0.605877  | -1.397001 | 4.538581  | 86  | C      | 3.714253  | -1.272497 | -3.564871 |
| 22  | H      | 0.84623   | 0.05864   | 3.541532  | 87  | H      | 3.23108   | -1.266724 | -4.563068 |
| 23  | C      | -0.708072 | -1.620338 | 1.577621  | 88  | H      | 4.642804  | -1.846514 | -3.640809 |
| 24  | C      | -2.073152 | -1.882742 | 0.901122  | 89  | H      | 3.987439  | -0.247966 | -3.300569 |
| 25  | H      | -2.823333 | -2.155904 | 1.640641  | 90  | N      | 2.863279  | -1.860178 | -2.535223 |
| 26  | C      | -3.650305 | 0.015366  | 0.724521  |     |        |           |           |           |
| 27  | C      | -4.037875 | 1.312735  | -0.008585 |     |        |           |           |           |
| 28  | C      | -5.293766 | 1.173164  | -0.932773 |     |        |           |           |           |
| 29  | H      | -5.094493 | 1.135357  | -2.009515 |     |        |           |           |           |
| 30  | H      | -5.883418 | 0.299233  | -0.646837 |     |        |           |           |           |
| 31  | C      | -5.862642 | 2.485643  | -0.335169 |     |        |           |           |           |
| 32  | H      | -5.659779 | 3.354261  | -0.968163 |     |        |           |           |           |
| 33  | H      | -6.923969 | 2.483351  | -0.073127 |     |        |           |           |           |
| 34  | C      | -4.849485 | 2.346044  | 0.831666  |     |        |           |           |           |
| 35  | H      | -5.282226 | 1.848154  | 1.700718  |     |        |           |           |           |
| 36  | H      | -4.296262 | 3.230415  | 1.150207  |     |        |           |           |           |
| 37  | C      | -1.853627 | 2.492955  | -0.152072 |     |        |           |           |           |
| 38  | C      | -0.786071 | 3.034455  | -1.129173 |     |        |           |           |           |
| 39  | H      | -1.181919 | 3.0095    | -2.151849 |     |        |           |           |           |
| 40  | C      | -0.3194   | 4.451119  | -0.733533 |     |        |           |           |           |
| 41  | H      | -0.879225 | 5.222636  | -1.268866 |     |        |           |           |           |
| 42  | H      | -0.484681 | 4.584711  | 0.339741  |     |        |           |           |           |
| 43  | C      | 1.186211  | 4.460654  | -1.044557 |     |        |           |           |           |
| 44  | H      | 1.364944  | 4.647377  | -2.110116 |     |        |           |           |           |
| 45  | H      | 1.731134  | 5.217027  | -0.472965 |     |        |           |           |           |
| 46  | C      | 1.618496  | 3.036555  | -0.682538 |     |        |           |           |           |
| 47  | H      | 2.529947  | 2.711897  | -1.185225 |     |        |           |           |           |
| 48  | H      | 1.772752  | 2.932036  | 0.398158  |     |        |           |           |           |
| 49  | C      | 0.439954  | 0.953954  | -1.550016 |     |        |           |           |           |
| 50  | C      | 1.780971  | 0.195977  | -1.621794 |     |        |           |           |           |
| 51  | H      | 2.494566  | 0.820964  | -2.166236 |     |        |           |           |           |
| 52  | C      | 3.639741  | 0.309797  | -0.029464 |     |        |           |           |           |
| 53  | C      | 5.352365  | -0.013857 | 1.719775  |     |        |           |           |           |
| 54  | C      | 5.656662  | 1.47399   | 1.929816  |     |        |           |           |           |
| 55  | H      | 5.711899  | 2.003274  | 0.977658  |     |        |           |           |           |
| 56  | H      | 6.615398  | 1.580189  | 2.448952  |     |        |           |           |           |
| 57  | H      | 4.882171  | 1.936307  | 2.551124  |     |        |           |           |           |
| 58  | C      | 6.371838  | -0.692364 | 0.797942  |     |        |           |           |           |
| 59  | H      | 6.092933  | -1.737293 | 0.628364  |     |        |           |           |           |
| 60  | H      | 7.359435  | -0.674448 | 1.271592  |     |        |           |           |           |
| 61  | H      | 6.433487  | -0.18316  | -0.164555 |     |        |           |           |           |
| 62  | C      | 5.273083  | -0.743072 | 3.064451  |     |        |           |           |           |
| 63  | H      | 4.518849  | -0.282756 | 3.710169  |     |        |           |           |           |
| 64  | H      | 6.240864  | -0.694707 | 3.573367  |     |        |           |           |           |
| 65  | H      | 5.009229  | -1.794685 | 2.917398  |     |        |           |           |           |

**Calculation Type = FREQ**

Calculation Method = RB3LYP  
 Basis Set = 6-31+G(d,p)  
 Charge = 0  
 Spin = Singlet  
 E(RB3LYP) = -1877.16026864 a.u.  
 RMS Gradient Norm = 0.00000197 a.u.  
 Imaginary Freq = 0  
 Dipole Moment = 1.7800 Debye  
 Point Group = C1  
 Job cpu time: 7 days 21 hours 49 minutes 57.1 seconds.

**Calculation Type = SP**

Calculation Method = RM062X  
 Basis Set = 6-311++G(2d,3p)  
 Charge = 0  
 Spin = Singlet  
 E(RM062X) = -1876.85098237 a.u.  
 Dipole Moment = 1.7670 Debye  
 Point Group = C1  
 Job cpu time: 1 days 17 hours 1 minutes 44.2 seconds.

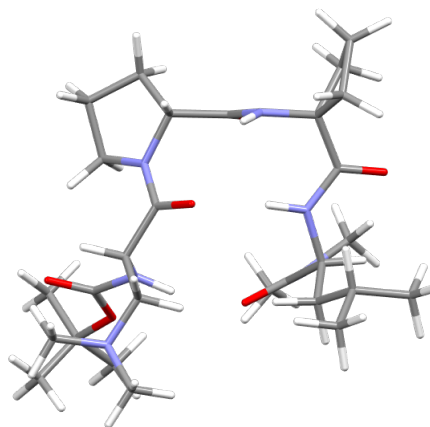

**Table S6.17: B3LYP/6-31+G(d,p)-Optimized Coordinates of 16c**

| Tag | Symbol | X         | Y         | Z         | Tag | Symbol | X         | Y         | Z         |
|-----|--------|-----------|-----------|-----------|-----|--------|-----------|-----------|-----------|
| 1   | O      | 2.471349  | 1.370032  | -1.565859 | 66  | H      | -0.751891 | 4.68361   | 2.222132  |
| 2   | O      | 3.457404  | -1.508857 | 1.374367  | 67  | C      | -3.591242 | 0.987148  | -2.029252 |
| 3   | O      | -0.220063 | -3.446379 | 1.354529  | 68  | H      | -3.775597 | 1.987453  | -2.45862  |
| 4   | O      | -1.255879 | -0.665557 | -0.934333 | 69  | H      | -2.949794 | 0.442886  | -2.730083 |
| 5   | O      | -1.391452 | 2.442861  | 1.331568  | 70  | C      | -5.176329 | -0.589819 | -2.993066 |
| 6   | O      | -0.209104 | 3.593585  | -0.27233  | 71  | H      | -5.376079 | 0.003992  | -3.905245 |
| 7   | N      | 4.591422  | 0.537086  | -1.466845 | 72  | H      | -6.073391 | -1.175523 | -2.768971 |
| 8   | N      | 1.762488  | -1.039827 | -0.065238 | 73  | H      | -4.360786 | -1.286708 | -3.204504 |
| 9   | H      | 0.773026  | -0.856937 | -0.202666 | 74  | C      | -5.947682 | 1.110386  | -1.46902  |
| 10  | N      | -0.128306 | -1.246112 | 1.947279  | 75  | H      | -5.689799 | 1.712518  | -0.59249  |
| 11  | H      | -0.619199 | -0.359349 | 1.946696  | 76  | H      | -6.824737 | 0.506131  | -1.21666  |
| 12  | N      | -2.722683 | -0.852986 | 0.781685  | 77  | H      | -6.228711 | 1.804918  | -2.283554 |
| 13  | N      | -1.767748 | 2.15064   | -0.909541 | 78  | C      | 1.8557    | -1.380248 | -2.508993 |
| 14  | H      | -1.262611 | 2.160069  | -1.786033 | 79  | H      | 1.020893  | -0.678754 | -2.610857 |
| 15  | N      | -4.83461  | 0.238085  | -1.837666 | 80  | H      | 2.514648  | -1.209581 | -3.37216  |
| 16  | C      | 5.548723  | -0.507749 | -1.091439 | 81  | C      | 1.331646  | -2.830316 | -2.554669 |
| 17  | H      | 5.157906  | -1.118776 | -0.276516 | 82  | H      | 0.763741  | -3.018182 | -1.634996 |
| 18  | H      | 6.458654  | -0.020319 | -0.730359 | 83  | C      | 0.368068  | -2.994235 | -3.740744 |
| 19  | H      | 5.821113  | -1.141594 | -1.945744 | 84  | H      | -0.472758 | -2.29671  | -3.662155 |
| 20  | C      | 5.162322  | 1.831951  | -1.824351 | 85  | H      | -0.03839  | -4.011334 | -3.779107 |
| 21  | H      | 4.375833  | 2.468593  | -2.226772 | 86  | H      | 0.878801  | -2.804584 | -4.694254 |
| 22  | H      | 5.94721   | 1.693198  | -2.576633 | 87  | C      | 2.466221  | -3.864573 | -2.632279 |
| 23  | H      | 5.604325  | 2.323019  | -0.94731  | 88  | H      | 3.075492  | -3.710562 | -3.533139 |
| 24  | C      | 3.231811  | 0.407315  | -1.414389 | 89  | H      | 2.060852  | -4.881595 | -2.675274 |
| 25  | C      | 2.636022  | -1.006303 | -1.233414 | 90  | H      | 3.129851  | -3.820063 | -1.76243  |
| 26  | H      | 3.42284   | -1.736928 | -1.057066 |     |        |           |           |           |
| 27  | C      | 2.255313  | -1.298666 | 1.167798  |     |        |           |           |           |
| 28  | C      | 1.271492  | -1.263402 | 2.352622  |     |        |           |           |           |
| 29  | C      | 1.651014  | -0.114962 | 3.348576  |     |        |           |           |           |
| 30  | H      | 2.276557  | 0.683115  | 2.943371  |     |        |           |           |           |
| 31  | H      | 0.752342  | 0.324968  | 3.792703  |     |        |           |           |           |
| 32  | C      | 2.334809  | -1.155513 | 4.274062  |     |        |           |           |           |
| 33  | H      | 3.419681  | -1.158397 | 4.154114  |     |        |           |           |           |
| 34  | H      | 2.087591  | -1.091995 | 5.337755  |     |        |           |           |           |
| 35  | C      | 1.656925  | -2.291392 | 3.465093  |     |        |           |           |           |
| 36  | H      | 0.759076  | -2.687341 | 3.944966  |     |        |           |           |           |
| 37  | H      | 2.288531  | -3.117518 | 3.139257  |     |        |           |           |           |
| 38  | C      | -0.760807 | -2.348034 | 1.459925  |     |        |           |           |           |
| 39  | C      | -2.246474 | -2.212392 | 1.110848  |     |        |           |           |           |
| 40  | H      | -2.398326 | -2.869218 | 0.247717  |     |        |           |           |           |
| 41  | C      | -3.144413 | -2.634768 | 2.295193  |     |        |           |           |           |
| 42  | H      | -3.28222  | -3.717302 | 2.322379  |     |        |           |           |           |
| 43  | H      | -2.680269 | -2.331884 | 3.241102  |     |        |           |           |           |
| 44  | C      | -4.441589 | -1.847604 | 2.065277  |     |        |           |           |           |
| 45  | H      | -5.042455 | -1.736729 | 2.972282  |     |        |           |           |           |
| 46  | H      | -5.058576 | -2.345116 | 1.308358  |     |        |           |           |           |
| 47  | C      | -3.951317 | -0.496711 | 1.526724  |     |        |           |           |           |
| 48  | H      | -4.681265 | -0.037055 | 0.861506  |     |        |           |           |           |
| 49  | H      | -3.711335 | 0.202129  | 2.337795  |     |        |           |           |           |
| 50  | C      | -2.208722 | -0.202121 | -0.292538 |     |        |           |           |           |
| 51  | C      | -2.807893 | 1.158684  | -0.710706 |     |        |           |           |           |
| 52  | H      | -3.463178 | 1.545744  | 0.070338  |     |        |           |           |           |
| 53  | C      | -1.120383 | 2.708539  | 0.16345   |     |        |           |           |           |
| 54  | C      | 0.701816  | 4.315384  | 0.640642  |     |        |           |           |           |
| 55  | C      | 1.574224  | 5.108585  | -0.33526  |     |        |           |           |           |
| 56  | H      | 2.111299  | 4.426787  | -1.000303 |     |        |           |           |           |
| 57  | H      | 2.301578  | 5.709453  | 0.220011  |     |        |           |           |           |
| 58  | H      | 0.960531  | 5.781262  | -0.942552 |     |        |           |           |           |
| 59  | C      | 1.549124  | 3.318203  | 1.43388   |     |        |           |           |           |
| 60  | H      | 0.939207  | 2.763166  | 2.147954  |     |        |           |           |           |
| 61  | H      | 2.321857  | 3.862659  | 1.987776  |     |        |           |           |           |
| 62  | H      | 2.038245  | 2.618537  | 0.749915  |     |        |           |           |           |
| 63  | C      | -0.111417 | 5.249111  | 1.542829  |     |        |           |           |           |
| 64  | H      | -0.735223 | 5.916843  | 0.939381  |     |        |           |           |           |
| 65  | H      | 0.57115   | 5.86634   | 2.136889  |     |        |           |           |           |

**Calculation Type = FREQ**

Calculation Method = RB3LYP  
 Basis Set = 6-31+G(d,p)  
 Charge = 0  
 Spin = Singlet  
 E(RB3LYP) = -1877.15280365 a.u.  
 RMS Gradient Norm = 0.00000230 a.u.  
 Imaginary Freq = 0  
 Dipole Moment = 5.3348 Debye  
 Point Group = C1  
 Job cpu time: 7 days 13 hours 21 minutes 15.4 seconds.

**Calculation Type = SP**

Calculation Method = RM062X  
 Basis Set = 6-311++G(2d,3p)  
 Charge = 0  
 Spin = Singlet  
 E(RM062X) = -1876.84358068 a.u.  
 Dipole Moment = 5.3907 Debye  
 Point Group = C1  
 Job cpu time: 1 days 9 hours 57 minutes 20.4 seconds.

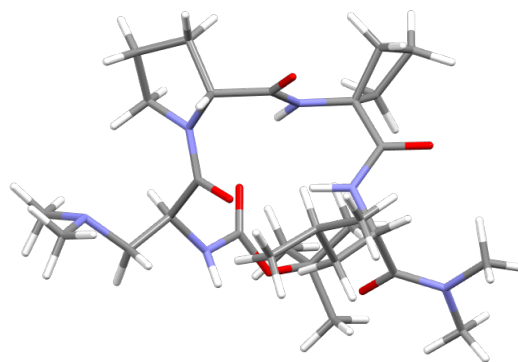

**Table S6.18:** Comparative Energy Data for **16a–c**

| Method                                                  |                                  | Boc-Dmaa-D-Pro-Acbbc-Leu-NMe <sub>2</sub> ( <b>16</b> ) |                 |                 |
|---------------------------------------------------------|----------------------------------|---------------------------------------------------------|-----------------|-----------------|
|                                                         |                                  | <b>16a</b>                                              | <b>16b</b>      | <b>16c</b>      |
| sp of X-ray crystal structure<br>M06-2X/6-311++G(2d,3p) | E(sp, M06-2X, au)                | -1876.248550570                                         | -1876.352670060 | -1876.434337570 |
|                                                         | Relative E(sp, M06-2X, kcal/mol) | 116.58                                                  | 51.25           | 0.00            |
|                                                         | Dipole Moment (D)                | 2.252                                                   | 1.296           | 8.828           |
| opt of X-ray crystal structure<br>B3LYP/6-31+G(d,p)     | E(opt, B3LYP, au)                | -1877.160095310                                         | -1877.160268640 | -1877.152803650 |
|                                                         | ZP Correction (au)               | 0.784781                                                | 0.784804        | 0.783972        |
|                                                         | E Correction (au)                | 0.830262                                                | 0.830166        | 0.830001        |
|                                                         | H Correction (au)                | 0.831206                                                | 0.831110        | 0.830945        |
|                                                         | G Correction (au)                | 0.701878                                                | 0.702579        | 0.699899        |
|                                                         | ZPE (au)                         | -1876.375314310                                         | -1876.375464640 | -1876.368831650 |
|                                                         | Relative ZPE (kcal/mol)          | 0.09                                                    | 0.00            | 4.16            |
|                                                         | E (au)                           | -1876.329833310                                         | -1876.330102640 | -1876.322802650 |
|                                                         | Relative E (kcal/mol)            | 0.17                                                    | 0.00            | 4.58            |
|                                                         | H (au)                           | -1876.328889310                                         | -1876.329158640 | -1876.321858650 |
|                                                         | Relative H (kcal/mol)            | 0.17                                                    | 0.00            | 4.58            |
|                                                         | G (au)                           | -1876.458217310                                         | -1876.457689640 | -1876.452904650 |
|                                                         | Relative G (kcal/mol)            | -0.33                                                   | 0.00            | 3.00            |
|                                                         | S (cal/mol*K)                    | 272.194                                                 | 270.516         | 275.81          |
| Relative S(cal/mol*K)                                   | 1.68                             | 0.00                                                    | 5.29            |                 |
| Dipole Moment (D)                                       | 1.323                            | 1.780                                                   | 5.335           |                 |
| sp of optimized structure<br>M06-2X/6-311++G(2d,3p)     | E(sp, M06-2X, au)                | -1876.847661050                                         | -1876.850982370 | -1876.843580680 |
|                                                         | ZPE (au)                         | -1876.062880050                                         | -1876.066178370 | -1876.059608680 |
|                                                         | Relative ZPE (kcal/mol)          | 2.07                                                    | 0.00            | 4.12            |
|                                                         | E (au)                           | -1876.017399050                                         | -1876.020816370 | -1876.013579680 |
|                                                         | Relative E (kcal/mol)            | 2.14                                                    | 0.00            | 4.54            |
|                                                         | H (au)                           | -1876.016455050                                         | -1876.019872370 | -1876.012635680 |
|                                                         | Relative H (kcal/mol)            | 2.14                                                    | 0.00            | 4.54            |
|                                                         | G (au)                           | -1876.145783050                                         | -1876.148403370 | -1876.143681680 |
|                                                         | Relative G (kcal/mol)            | 1.64                                                    | 0.00            | 2.96            |
| Dipole Moment (D)                                       | 1.322                            | 1.767                                                   | 5.391           |                 |

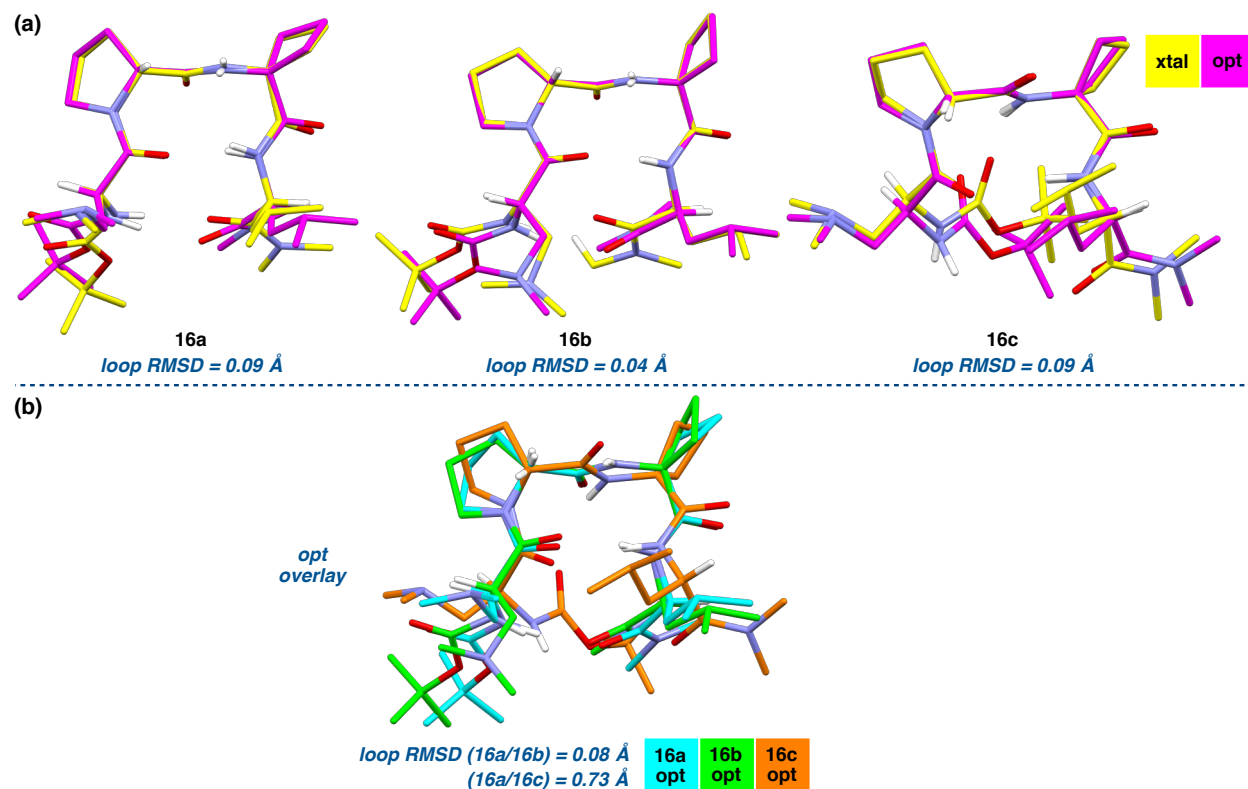

**Figure S6.04:** (a) Overlays of the DFT-optimized structures of **16a–c** with the corresponding crystal structures. (b) Overlay of the optimized structures of **16a–c**.

## G. Optimization of Peptide 19a,b

**Table S6.19:** B3LYP/6-31+G(d,p)-Optimized Coordinates of 19a

| Tag | Symbol | X         | Y         | Z         | Tag | Symbol | X         | Y         | Z         |
|-----|--------|-----------|-----------|-----------|-----|--------|-----------|-----------|-----------|
| 1   | O      | -0.42224  | 1.309583  | 2.959007  | 63  | C      | -3.785644 | 3.878125  | -2.561177 |
| 2   | O      | 0.398875  | 3.040366  | 4.150578  | 64  | H      | -4.717606 | 4.23317   | -2.081358 |
| 3   | O      | 3.350483  | 0.155962  | 2.212549  | 65  | H      | -3.791739 | 4.217066  | -3.601879 |
| 4   | O      | 2.956902  | 0.996888  | -1.946886 | 66  | H      | -2.935319 | 4.345108  | -2.056876 |
| 5   | O      | -0.616774 | 1.838449  | -0.810049 | 67  | C      | 1.575591  | 3.743173  | 1.470657  |
| 6   | O      | -3.767771 | -1.876469 | -0.406404 | 68  | H      | 1.465638  | 4.509462  | 2.246801  |
| 7   | O      | -3.064671 | -1.51542  | 1.752655  | 69  | H      | 0.672969  | 3.782313  | 0.846801  |
| 8   | N      | 1.629431  | 1.275369  | 1.221241  | 70  | C      | 2.807381  | 4.059691  | 0.599259  |
| 9   | H      | 0.970316  | 1.319735  | 0.450209  | 71  | H      | 2.931423  | 3.24816   | -0.129464 |
| 10  | N      | 1.573191  | -0.503857 | -0.901475 | 72  | C      | 2.559375  | 5.35883   | -0.184663 |
| 11  | H      | 0.63451   | -0.877574 | -0.925793 | 73  | H      | 1.660331  | 5.284091  | -0.80714  |
| 12  | N      | -0.584641 | 0.314816  | -2.483573 | 74  | H      | 3.405052  | 5.585719  | -0.843176 |
| 13  | N      | -2.644237 | 0.025738  | 0.200086  | 75  | H      | 2.427816  | 6.211094  | 0.494802  |
| 14  | H      | -2.150465 | 0.498375  | 0.947292  | 76  | C      | 4.100702  | 4.161944  | 1.423303  |
| 15  | N      | -3.644765 | 2.423991  | -2.52414  | 77  | H      | 4.016272  | 4.940538  | 2.192706  |
| 16  | C      | -1.476863 | 1.192638  | 3.938517  | 78  | H      | 4.94675   | 4.421889  | 0.777489  |
| 17  | H      | -2.091022 | 0.357334  | 3.603733  | 79  | H      | 4.352417  | 3.220008  | 1.920601  |
| 18  | H      | -2.05946  | 2.116093  | 3.982148  | 80  | C      | -3.213166 | -1.193225 | 0.445541  |
| 19  | H      | -1.053678 | 0.991721  | 4.925334  | 81  | C      | -3.596245 | -2.785829 | 2.298195  |
| 20  | C      | 0.481197  | 2.286243  | 3.202561  | 82  | C      | -2.908234 | -3.975531 | 1.621036  |
| 21  | C      | 1.615817  | 2.367584  | 2.176863  | 83  | H      | -3.171125 | -4.037976 | 0.564323  |
| 22  | H      | 2.530888  | 2.278428  | 2.768986  | 84  | H      | -3.218872 | -4.902426 | 2.114579  |
| 23  | C      | 2.519234  | 0.256422  | 1.30877   | 85  | H      | -1.82064  | -3.891473 | 1.716477  |
| 24  | C      | 2.410973  | -0.872365 | 0.249683  | 86  | C      | -5.119941 | -2.825915 | 2.143089  |
| 25  | C      | 1.765933  | -2.135062 | 0.906268  | 87  | H      | -5.572731 | -1.934366 | 2.589151  |
| 26  | H      | 2.040046  | -2.158956 | 1.967398  | 88  | H      | -5.513398 | -3.7032   | 2.667345  |
| 27  | H      | 0.670311  | -2.113189 | 0.856493  | 89  | H      | -5.411664 | -2.88522  | 1.093784  |
| 28  | C      | 2.402871  | -3.288871 | 0.162751  | 90  | C      | -3.203033 | -2.702464 | 3.775055  |
| 29  | C      | 1.996086  | -4.619221 | 0.081471  | 91  | H      | -3.535543 | -3.603451 | 4.299347  |
| 30  | H      | 1.089992  | -4.95741  | 0.578463  | 92  | H      | -3.66936  | -1.83558  | 4.253068  |
| 31  | C      | 2.772561  | -5.522057 | -0.657403 | 93  | H      | -2.117577 | -2.619749 | 3.884579  |
| 32  | H      | 2.464737  | -6.560883 | -0.735744 |     |        |           |           |           |
| 33  | C      | 3.938794  | -5.091003 | -1.298691 |     |        |           |           |           |
| 34  | H      | 4.53136   | -5.798172 | -1.872309 |     |        |           |           |           |
| 35  | C      | 4.346328  | -3.7532   | -1.210466 |     |        |           |           |           |
| 36  | H      | 5.252624  | -3.422784 | -1.711546 |     |        |           |           |           |
| 37  | C      | 3.572987  | -2.855167 | -0.476293 |     |        |           |           |           |
| 38  | C      | 3.806635  | -1.385075 | -0.214148 |     |        |           |           |           |
| 39  | H      | 4.174935  | -0.822601 | -1.072791 |     |        |           |           |           |
| 40  | H      | 4.511912  | -1.242781 | 0.612341  |     |        |           |           |           |
| 41  | C      | 1.878554  | 0.416325  | -1.85681  |     |        |           |           |           |
| 42  | C      | 0.774546  | 0.729761  | -2.886904 |     |        |           |           |           |
| 43  | H      | 0.808644  | 1.817161  | -2.991868 |     |        |           |           |           |
| 44  | C      | 0.987113  | 0.014101  | -4.241217 |     |        |           |           |           |
| 45  | H      | 0.690244  | 0.68566   | -5.053844 |     |        |           |           |           |
| 46  | H      | 2.034276  | -0.25322  | -4.397559 |     |        |           |           |           |
| 47  | C      | 0.041939  | -1.197756 | -4.179198 |     |        |           |           |           |
| 48  | H      | -0.223041 | -1.583788 | -5.166975 |     |        |           |           |           |
| 49  | H      | 0.502426  | -2.014684 | -3.612747 |     |        |           |           |           |
| 50  | C      | -1.181342 | -0.659098 | -3.426372 |     |        |           |           |           |
| 51  | H      | -1.873741 | -0.146928 | -4.106295 |     |        |           |           |           |
| 52  | H      | -1.729121 | -1.439654 | -2.893372 |     |        |           |           |           |
| 53  | C      | -1.214232 | 0.989504  | -1.488616 |     |        |           |           |           |
| 54  | C      | -2.662238 | 0.631746  | -1.124903 |     |        |           |           |           |
| 55  | H      | -3.079491 | -0.11824  | -1.794784 |     |        |           |           |           |
| 56  | C      | -3.530095 | 1.904819  | -1.161133 |     |        |           |           |           |
| 57  | H      | -4.512334 | 1.672395  | -0.712935 |     |        |           |           |           |
| 58  | H      | -3.046273 | 2.65794   | -0.532742 |     |        |           |           |           |
| 59  | C      | -4.711904 | 1.770886  | -3.27934  |     |        |           |           |           |
| 60  | H      | -4.580686 | 0.685017  | -3.273461 |     |        |           |           |           |
| 61  | H      | -4.686144 | 2.107066  | -4.320536 |     |        |           |           |           |
| 62  | H      | -5.716235 | 1.991781  | -2.869739 |     |        |           |           |           |

**Calculation Type = FREQ**

Calculation Method = RB3LYP

Basis Set = 6-31+G(d,p)

Charge = 0

Spin = Singlet

E(RB3LYP) = -2049.48741410 a.u.

RMS Gradient Norm = 0.00000185 a.u.

Imaginary Freq = 0

Dipole Moment = 8.8503 Debye

Point Group = C1

Job cpu time: 10 days 15 hours 50 minutes 12.7 seconds.

**Calculation Type = SP**

Calculation Method = RM062X

Basis Set = 6-311++G(2d,3p)

Charge = 0

Spin = Singlet

E(RM062X) = -2049.16094379 a.u.

Dipole Moment = 8.7942 Debye

Point Group = C1

Job cpu time: 1 days 10 hours 33 minutes 25.0 seconds.

**Table S6.20:** B3LYP/6-31+G(d,p)-Optimized Coordinates of **19b**

| Tag | Symbol | X         | Y         | Z         | Tag | Symbol | X         | Y         | Z         |
|-----|--------|-----------|-----------|-----------|-----|--------|-----------|-----------|-----------|
| 1   | O      | -4.324992 | 0.133797  | -2.960147 | 66  | H      | -2.625597 | 5.275832  | -0.82802  |
| 2   | O      | -2.410329 | 1.054465  | -2.190971 | 67  | C      | -4.278971 | -0.830361 | -0.09234  |
| 3   | O      | -1.52703  | -3.179565 | -1.845203 | 68  | H      | -3.980004 | 0.047653  | 0.494487  |
| 4   | O      | -0.810541 | -2.683676 | 2.22091   | 69  | H      | -5.240402 | -0.593267 | -0.565498 |
| 5   | O      | -1.396035 | 0.857992  | 1.471937  | 70  | C      | -4.458657 | -2.033761 | 0.855523  |
| 6   | O      | 1.580719  | 1.21028   | -0.262678 | 71  | H      | -3.477799 | -2.281409 | 1.28046   |
| 7   | O      | 2.761679  | 3.132983  | -0.676578 | 72  | C      | -5.386901 | -1.63761  | 2.014949  |
| 8   | N      | -1.903924 | -1.258559 | -0.677277 | 73  | H      | -4.99403  | -0.773357 | 2.562587  |
| 9   | H      | -1.554851 | -0.587674 | 0.00054   | 74  | H      | -5.497463 | -2.4634   | 2.726413  |
| 10  | N      | 0.476291  | -1.525501 | 0.717133  | 75  | H      | -6.388775 | -1.37738  | 1.648223  |
| 11  | H      | 0.936986  | -0.635545 | 0.546392  | 76  | C      | -4.994093 | -3.278537 | 0.130295  |
| 12  | N      | 0.553599  | 0.673633  | 2.595141  | 77  | H      | -5.962897 | -3.071313 | -0.343979 |
| 13  | N      | 1.258905  | 3.140503  | 0.954813  | 78  | H      | -5.140584 | -4.101323 | 0.839007  |
| 14  | H      | 1.413263  | 4.137075  | 0.843805  | 79  | H      | -4.305953 | -3.636158 | -0.641781 |
| 15  | N      | -0.962329 | 4.897183  | 0.478094  | 80  | C      | 1.836576  | 2.388265  | -0.035111 |
| 16  | C      | -4.471594 | 1.235134  | -3.875136 | 81  | C      | 3.624156  | 2.581435  | -1.74594  |
| 17  | H      | -4.558883 | 2.177589  | -3.328409 | 82  | C      | 4.492737  | 3.785772  | -2.118359 |
| 18  | H      | -5.384496 | 1.029154  | -4.433448 | 83  | H      | 3.87247   | 4.617572  | -2.465129 |
| 19  | H      | -3.61232  | 1.287784  | -4.548097 | 84  | H      | 5.184036  | 3.510521  | -2.920735 |
| 20  | C      | -3.236729 | 0.16528   | -2.15834  | 85  | H      | 5.07719   | 4.123909  | -1.257414 |
| 21  | C      | -3.231538 | -1.039032 | -1.213942 | 86  | C      | 4.48615   | 1.444378  | -1.189237 |
| 22  | H      | -3.485465 | -1.919322 | -1.808778 | 87  | H      | 5.039725  | 1.782705  | -0.307159 |
| 23  | C      | -1.152826 | -2.328697 | -1.03481  | 88  | H      | 5.214943  | 1.139191  | -1.947342 |
| 24  | C      | 0.278201  | -2.411246 | -0.442702 | 89  | H      | 3.884808  | 0.575955  | -0.918681 |
| 25  | C      | 0.689954  | -3.877146 | -0.110431 | 90  | C      | 2.762595  | 2.145148  | -2.934693 |
| 26  | H      | 0.438143  | -4.145447 | 0.915885  | 91  | H      | 2.109905  | 1.311752  | -2.6732   |
| 27  | H      | 0.132755  | -4.544341 | -0.777811 | 92  | H      | 3.412608  | 1.835126  | -3.759607 |
| 28  | C      | 2.166323  | -3.917136 | -0.427337 | 93  | H      | 2.144888  | 2.978445  | -3.284334 |
| 29  | C      | 3.125052  | -4.852589 | -0.040246 |     |        |           |           |           |
| 30  | H      | 2.855612  | -5.688769 | 0.600246  |     |        |           |           |           |
| 31  | C      | 4.444744  | -4.703379 | -0.487323 |     |        |           |           |           |
| 32  | H      | 5.200501  | -5.424691 | -0.188759 |     |        |           |           |           |
| 33  | C      | 4.795856  | -3.63097  | -1.314306 |     |        |           |           |           |
| 34  | H      | 5.822062  | -3.524459 | -1.655115 |     |        |           |           |           |
| 35  | C      | 3.831037  | -2.691722 | -1.702871 |     |        |           |           |           |
| 36  | H      | 4.106662  | -1.861132 | -2.348018 |     |        |           |           |           |
| 37  | C      | 2.521164  | -2.839217 | -1.250163 |     |        |           |           |           |
| 38  | C      | 1.304172  | -1.9909   | -1.546102 |     |        |           |           |           |
| 39  | H      | 0.889014  | -2.251648 | -2.52694  |     |        |           |           |           |
| 40  | H      | 1.491035  | -0.913732 | -1.540761 |     |        |           |           |           |
| 41  | C      | -0.104073 | -1.718595 | 1.931533  |     |        |           |           |           |
| 42  | C      | 0.209353  | -0.694959 | 3.034135  |     |        |           |           |           |
| 43  | H      | -0.700051 | -0.65887  | 3.643322  |     |        |           |           |           |
| 44  | C      | 1.429376  | -1.114139 | 3.883812  |     |        |           |           |           |
| 45  | H      | 2.178212  | -1.598883 | 3.24697   |     |        |           |           |           |
| 46  | H      | 1.144448  | -1.821267 | 4.665103  |     |        |           |           |           |
| 47  | C      | 1.972024  | 0.21847   | 4.421044  |     |        |           |           |           |
| 48  | H      | 1.37403   | 0.557239  | 5.275191  |     |        |           |           |           |
| 49  | H      | 3.015716  | 0.158607  | 4.74186   |     |        |           |           |           |
| 50  | C      | 1.784563  | 1.175033  | 3.235956  |     |        |           |           |           |
| 51  | H      | 1.672181  | 2.218188  | 3.539336  |     |        |           |           |           |
| 52  | H      | 2.628386  | 1.116054  | 2.538291  |     |        |           |           |           |
| 53  | C      | -0.334469 | 1.371908  | 1.844181  |     |        |           |           |           |
| 54  | C      | -0.055758 | 2.854642  | 1.536139  |     |        |           |           |           |
| 55  | H      | -0.054561 | 3.361861  | 2.511671  |     |        |           |           |           |
| 56  | C      | -1.181953 | 3.45717   | 0.672081  |     |        |           |           |           |
| 57  | H      | -1.177837 | 2.9525    | -0.297858 |     |        |           |           |           |
| 58  | H      | -2.157026 | 3.242855  | 1.135365  |     |        |           |           |           |
| 59  | C      | -1.465027 | 5.690389  | 1.598245  |     |        |           |           |           |
| 60  | H      | -2.563961 | 5.619966  | 1.708729  |     |        |           |           |           |
| 61  | H      | -1.201522 | 6.742649  | 1.453123  |     |        |           |           |           |
| 62  | H      | -1.011603 | 5.363345  | 2.539181  |     |        |           |           |           |
| 63  | C      | -1.524509 | 5.372665  | -0.785383 |     |        |           |           |           |
| 64  | H      | -1.099961 | 4.805998  | -1.618263 |     |        |           |           |           |
| 65  | H      | -1.27071  | 6.428696  | -0.923275 |     |        |           |           |           |

**Calculation Type = FREQ**  
 Calculation Method = RB3LYP  
 Basis Set = 6-31+G(d,p)  
 Charge = 0  
 Spin = Singlet  
 E(RB3LYP) = -2049.48700001 a.u.  
 RMS Gradient Norm = 0.00000295 a.u.  
 Imaginary Freq = 0  
 Dipole Moment = 9.9607 Debye  
 Point Group = C1  
 Job cpu time: 12 days 1 hours 15 minutes 7.8 seconds.

**Calculation Type = SP**  
 Calculation Method = RM062X  
 Basis Set = 6-311++G(2d,3p)  
 Charge = 0  
 Spin = Singlet  
 E(RM062X) = -2049.16582187 a.u.  
 Dipole Moment = 9.8465 Debye  
 Point Group = C1  
 Job cpu time: 1 days 15 hours 40 minutes 24.0 seconds.

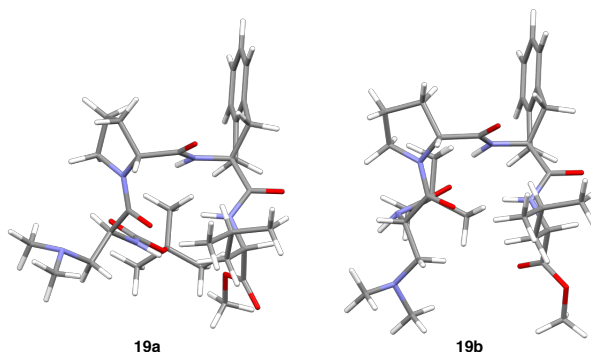

**Table S6.21: Comparative Energy Data for 19a,b**

| Method                                                  | Boc-Dmaa-D-Pro-Aic-Leu-OMe (19)  |                 |                 |
|---------------------------------------------------------|----------------------------------|-----------------|-----------------|
|                                                         | 19a                              | 19b             |                 |
| sp of X-ray crystal structure<br>M06-2X/6-311++G(2d,3p) | E(sp, M06-2X, au)                | -2048.734794180 | -2048.742395710 |
|                                                         | Relative E(sp, M06-2X, kcal/mol) | 4.77            | 0.00            |
|                                                         | Dipole Moment (D)                | 10.915          | 10.730          |
| opt of X-ray crystal structure<br>B3LYP/6-31+G(d,p)     | E(opt, B3LYP, au)                | -2049.487414100 | -2049.487000010 |
|                                                         | ZP Correction (au)               | 0.796772        | 0.796893        |
|                                                         | E Correction (au)                | 0.844042        | 0.843961        |
|                                                         | H Correction (au)                | 0.844986        | 0.844905        |
|                                                         | G Correction (au)                | 0.709116        | 0.710702        |
|                                                         | ZPE (au)                         | -2048.690642100 | -2048.690107010 |
|                                                         | Relative ZPE (kcal/mol)          | 0.00            | 0.34            |
|                                                         | E (au)                           | -2048.643372100 | -2048.643039010 |
|                                                         | Relative E (kcal/mol)            | 0.00            | 0.21            |
|                                                         | H (au)                           | -2048.642428100 | -2048.642095010 |
|                                                         | Relative H (kcal/mol)            | 0.00            | 0.21            |
|                                                         | G (au)                           | -2048.778298100 | -2048.776298010 |
|                                                         | Relative G (kcal/mol)            | 0.00            | 1.26            |
|                                                         | S (cal/mol*K)                    | 285.963         | 282.455         |
| Relative S(cal/mol*K)                                   | 0.00                             | -3.51           |                 |
| Dipole Moment (D)                                       | 8.850                            | 9.961           |                 |
| sp of optimized structure<br>M06-2X/6-311++G(2d,3p)     | E(sp, M06-2X, au)                | -2049.160943790 | -2049.165821870 |
|                                                         | ZPE (au)                         | -2048.364171790 | -2048.368928870 |
|                                                         | Relative ZPE (kcal/mol)          | 2.99            | 0.00            |
|                                                         | E (au)                           | -2048.316901790 | -2048.321860870 |
|                                                         | Relative E (kcal/mol)            | 3.11            | 0.00            |
|                                                         | H (au)                           | -2048.315957790 | -2048.320916870 |
|                                                         | Relative H (kcal/mol)            | 3.11            | 0.00            |
|                                                         | G (au)                           | -2048.451827790 | -2048.455119870 |
| Relative G (kcal/mol)                                   | 2.07                             | 0.00            |                 |
| Dipole Moment (D)                                       | 8.794                            | 9.847           |                 |

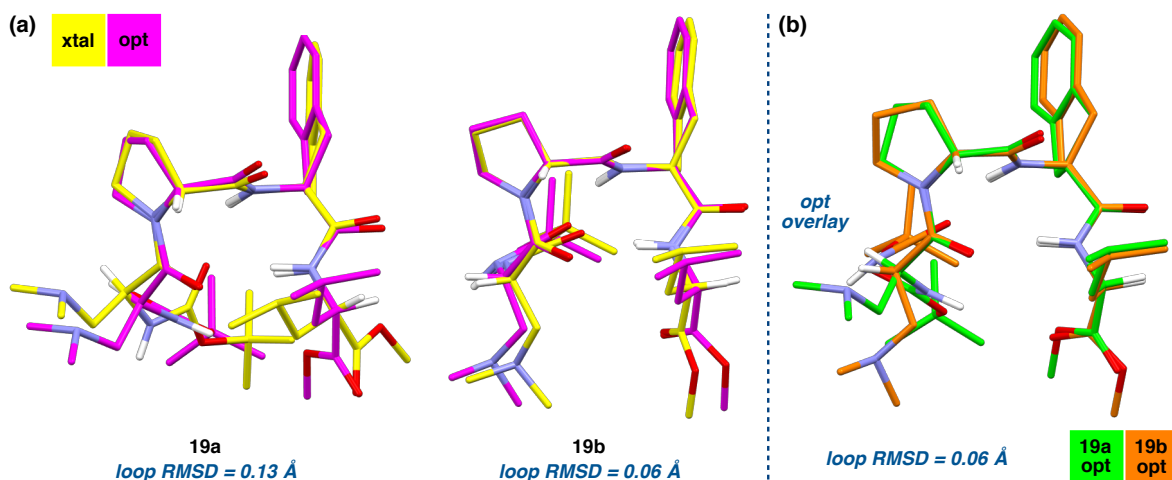

**Figure S6.05: (a)** Overlays of the DFT-optimized structures of **19a,b** with the corresponding crystal structures. **(b)** Overlay of the optimized structures of **19a** and **19b**.



## H. Optimization of Peptide 29a,b

**Table S6.22:** B3LYP/6-31+G(d,p)-Optimized Coordinates of 29a

| Tag | Symbol | X         | Y         | Z         | Tag | Symbol | X         | Y         | Z         |
|-----|--------|-----------|-----------|-----------|-----|--------|-----------|-----------|-----------|
| 1   | S      | -4.074342 | -2.118753 | -1.593252 | 63  | C      | 5.237228  | -1.023125 | 3.135824  |
| 2   | O      | 0.327635  | -1.52435  | 1.27616   | 64  | H      | 4.545782  | -0.395568 | 3.706481  |
| 3   | O      | -3.898521 | 0.886475  | 2.163748  | 65  | H      | 6.200482  | -1.037493 | 3.655235  |
| 4   | O      | -0.712333 | 3.042837  | 0.573127  | 66  | H      | 4.840579  | -2.042517 | 3.109787  |
| 5   | O      | -0.468024 | 0.22146   | -1.70433  | 67  | C      | -2.198414 | -2.350261 | 0.52577   |
| 6   | O      | 4.591008  | 0.29845   | -0.893496 | 68  | H      | -1.493426 | -2.269788 | -0.304823 |
| 7   | O      | 4.047837  | -0.540143 | 1.174456  | 69  | H      | -1.888127 | -3.226186 | 1.106539  |
| 8   | N      | -0.350663 | -0.516937 | 3.197082  | 70  | C      | -3.602279 | -2.564919 | 0.02975   |
| 9   | N      | -2.3242   | 0.128257  | 0.699712  | 71  | C      | -4.671013 | -3.109237 | 0.699401  |
| 10  | H      | -1.78484  | 0.299596  | -0.147221 | 72  | H      | -4.602306 | -3.463764 | 1.722889  |
| 11  | N      | -2.469469 | 2.479054  | -0.788349 | 73  | C      | -5.868684 | -3.165265 | -0.077694 |
| 12  | H      | -2.673056 | 2.14553   | -1.720789 | 74  | H      | -6.808652 | -3.563831 | 0.287372  |
| 13  | N      | 0.867194  | 2.040847  | -1.745171 | 75  | C      | -5.701804 | -2.66566  | -1.342063 |
| 14  | N      | 2.442016  | -0.297882 | -0.350431 | 76  | H      | -6.430512 | -2.593268 | -2.137881 |
| 15  | H      | 1.864365  | -0.779023 | 0.339918  | 77  | C      | 1.582925  | -1.577538 | -2.310697 |
| 16  | N      | 2.732133  | -2.473014 | -2.384608 | 78  | H      | 0.821446  | -2.038627 | -1.677554 |
| 17  | C      | 1.02464   | -0.469699 | 3.690527  | 79  | H      | 1.118407  | -1.41781  | -3.304128 |
| 18  | H      | 1.642315  | -1.164094 | 3.124706  | 80  | C      | 3.688132  | -2.095301 | -3.420893 |
| 19  | H      | 1.032956  | -0.740942 | 4.751523  | 81  | H      | 3.237653  | -2.094402 | -4.434377 |
| 20  | H      | 1.436959  | 0.541445  | 3.583644  | 82  | H      | 4.521273  | -2.804698 | -3.421744 |
| 21  | C      | -1.319341 | 0.180677  | 4.041551  | 83  | H      | 4.104477  | -1.105794 | -3.217897 |
| 22  | H      | -2.305209 | 0.236386  | 3.58563   | 84  | C      | 2.312269  | -3.862167 | -2.534316 |
| 23  | H      | -0.975109 | 1.207792  | 4.211906  | 85  | H      | 1.655217  | -4.143099 | -1.705871 |
| 24  | H      | -1.394683 | -0.322805 | 5.01329   | 86  | H      | 3.190646  | -4.515037 | -2.508169 |
| 25  | C      | -0.587699 | -1.057694 | 1.973448  | 87  | H      | 1.773404  | -4.052657 | -3.484094 |
| 26  | C      | -2.037155 | -1.103803 | 1.429476  |     |        |           |           |           |
| 27  | H      | -2.763895 | -1.157811 | 2.239751  |     |        |           |           |           |
| 28  | C      | -3.241196 | 1.031748  | 1.129914  |     |        |           |           |           |
| 29  | C      | -3.518088 | 2.265055  | 0.222127  |     |        |           |           |           |
| 30  | C      | -4.824053 | 1.966432  | -0.543192 |     |        |           |           |           |
| 31  | H      | -5.098501 | 2.827154  | -1.162448 |     |        |           |           |           |
| 32  | H      | -5.628808 | 1.775874  | 0.169493  |     |        |           |           |           |
| 33  | H      | -4.720242 | 1.08254   | -1.182066 |     |        |           |           |           |
| 34  | C      | -3.700741 | 3.517504  | 1.097548  |     |        |           |           |           |
| 35  | H      | -2.780264 | 3.763215  | 1.628349  |     |        |           |           |           |
| 36  | H      | -4.492378 | 3.336195  | 1.826266  |     |        |           |           |           |
| 37  | H      | -3.980615 | 4.363449  | 0.461473  |     |        |           |           |           |
| 38  | C      | -1.170515 | 2.817169  | -0.543903 |     |        |           |           |           |
| 39  | C      | -0.297053 | 2.93912   | -1.811038 |     |        |           |           |           |
| 40  | H      | -0.895103 | 2.682192  | -2.692549 |     |        |           |           |           |
| 41  | C      | 0.339207  | 4.342565  | -1.94205  |     |        |           |           |           |
| 42  | H      | -0.268306 | 5.114187  | -1.463014 |     |        |           |           |           |
| 43  | H      | 0.433286  | 4.596597  | -3.003927 |     |        |           |           |           |
| 44  | C      | 1.72733   | 4.187061  | -1.297857 |     |        |           |           |           |
| 45  | H      | 2.440861  | 4.942551  | -1.638481 |     |        |           |           |           |
| 46  | H      | 1.638165  | 4.251023  | -0.210204 |     |        |           |           |           |
| 47  | C      | 2.150835  | 2.770405  | -1.701481 |     |        |           |           |           |
| 48  | H      | 2.623875  | 2.762278  | -2.693073 |     |        |           |           |           |
| 49  | H      | 2.838358  | 2.307983  | -0.993785 |     |        |           |           |           |
| 50  | C      | 0.679134  | 0.701032  | -1.719308 |     |        |           |           |           |
| 51  | C      | 1.928514  | -0.200869 | -1.709036 |     |        |           |           |           |
| 52  | H      | 2.714843  | 0.276285  | -2.297444 |     |        |           |           |           |
| 53  | C      | 3.773523  | -0.154175 | -0.096706 |     |        |           |           |           |
| 54  | C      | 5.416963  | -0.478097 | 1.715704  |     |        |           |           |           |
| 55  | C      | 6.348551  | -1.38675  | 0.905331  |     |        |           |           |           |
| 56  | H      | 5.936125  | -2.399301 | 0.849465  |     |        |           |           |           |
| 57  | H      | 7.324085  | -1.442057 | 1.400697  |     |        |           |           |           |
| 58  | H      | 6.488931  | -1.006742 | -0.107251 |     |        |           |           |           |
| 59  | C      | 5.907191  | 0.974006  | 1.752774  |     |        |           |           |           |
| 60  | H      | 6.033081  | 1.372847  | 0.745402  |     |        |           |           |           |
| 61  | H      | 6.869863  | 1.02049   | 2.273505  |     |        |           |           |           |
| 62  | H      | 5.195731  | 1.602381  | 2.299059  |     |        |           |           |           |

### Calculation Type = FREQ

Calculation Method = RB3LYP

Basis Set = 6-31+G(d,p)

Charge = 0

Spin = Singlet

E(RB3LYP) = -2272.94624711 a.u.

RMS Gradient Norm = 0.00000304 a.u.

Imaginary Freq = 0

Dipole Moment = 1.9118 Debye

Point Group = C1

Job cpu time: 7 days 20 hours 35 minutes 25.5 seconds.

### Calculation Type = SP

Calculation Method = RM062X

Basis Set = 6-311++G(2d,3p)

Charge = 0

Spin = Singlet

E(RM062X) = -2272.65153093 a.u.

Dipole Moment = 1.9213 Debye

Point Group = C1

Job cpu time: 1 days 14 hours 38 minutes 39.1 seconds.

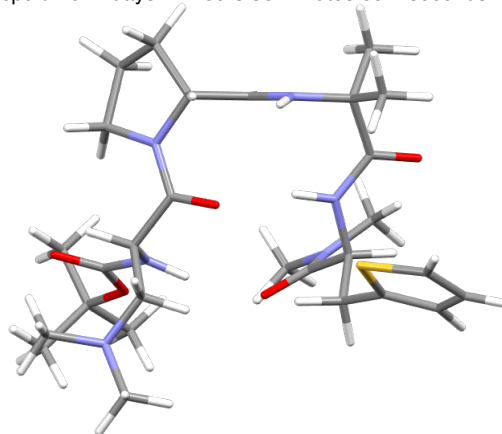

**Table S6.23: B3LYP/6-31+G(d,p)-Optimized Coordinates of 19b**

| Tag | Symbol | X         | Y         | Z         | Tag | Symbol | X         | Y         | Z         |
|-----|--------|-----------|-----------|-----------|-----|--------|-----------|-----------|-----------|
| 1   | S      | -4.074746 | -2.116787 | -1.593101 | 66  | H      | 5.19637   | 1.602515  | 2.298737  |
| 2   | O      | 0.327527  | -1.524372 | 1.276008  | 67  | C      | -2.198545 | -2.350279 | 0.525487  |
| 3   | O      | -3.898475 | 0.886377  | 2.163934  | 68  | H      | -1.493403 | -2.269811 | -0.304974 |
| 4   | O      | -0.711883 | 3.04278   | 0.573369  | 69  | H      | -1.888432 | -3.226264 | 1.106262  |
| 5   | O      | -0.468097 | 0.22159   | -1.704191 | 70  | C      | -3.602326 | -2.56491  | 0.029254  |
| 6   | O      | 4.590985  | 0.298403  | -0.893713 | 71  | C      | -4.670734 | -3.110681 | 0.698254  |
| 7   | O      | 4.047949  | -0.539857 | 1.174406  | 72  | H      | -4.601729 | -3.466613 | 1.721235  |
| 8   | N      | -0.350875 | -0.517764 | 3.197275  | 73  | C      | -5.86846  | -3.166185 | -0.07879  |
| 9   | N      | -2.324208 | 0.128279  | 0.69979   | 74  | H      | -6.808208 | -3.56569  | 0.285816  |
| 10  | H      | -1.784744 | 0.299737  | -0.147053 | 75  | C      | -5.701943 | -2.664742 | -1.342479 |
| 11  | N      | -2.469284 | 2.479344  | -0.787922 | 76  | H      | -6.43077  | -2.591576 | -2.138117 |
| 12  | H      | -2.673025 | 2.145903  | -1.720361 | 77  | C      | 1.5826    | -1.577623 | -2.310565 |
| 13  | N      | 0.867276  | 2.040849  | -1.74505  | 78  | H      | 0.821132  | -2.038575 | -1.67731  |
| 14  | N      | 2.442057  | -0.297977 | -0.350456 | 79  | H      | 1.117989  | -1.417854 | -3.303951 |
| 15  | H      | 1.864461  | -0.779091 | 0.339954  | 80  | C      | 2.311495  | -3.862308 | -2.534639 |
| 16  | N      | 2.73165   | -2.473281 | -2.384593 | 81  | H      | 1.77262   | -4.052455 | -3.48448  |
| 17  | C      | 1.024447  | -0.470834 | 3.690693  | 82  | H      | 1.654347  | -4.14329  | -1.706287 |
| 18  | H      | 1.641616  | -1.166565 | 3.125946  | 83  | H      | 3.189726  | -4.51538  | -2.508611 |
| 19  | H      | 1.032421  | -0.740488 | 4.752083  | 84  | C      | 3.687793  | -2.095534 | -3.420746 |
| 20  | H      | 1.43766   | 0.539791  | 3.582308  | 85  | H      | 3.237343  | -2.094232 | -4.434244 |
| 21  | C      | -1.319515 | 0.179634  | 4.041961  | 86  | H      | 4.520724  | -2.805176 | -3.421772 |
| 22  | H      | -2.30526  | 0.235967  | 3.585847  | 87  | H      | 4.104401  | -1.106202 | -3.217448 |
| 23  | H      | -0.974978 | 1.206524  | 4.213054  |     |        |           |           |           |
| 24  | H      | -1.395272 | -0.324436 | 5.013365  |     |        |           |           |           |
| 25  | C      | -0.587867 | -1.058001 | 1.97341   |     |        |           |           |           |
| 26  | C      | -2.037305 | -1.10394  | 1.429359  |     |        |           |           |           |
| 27  | H      | -2.764099 | -1.158035 | 2.23958   |     |        |           |           |           |
| 28  | C      | -3.241144 | 1.031759  | 1.130108  |     |        |           |           |           |
| 29  | C      | -3.517824 | 2.265359  | 0.222635  |     |        |           |           |           |
| 30  | C      | -4.823956 | 1.967246  | -0.542588 |     |        |           |           |           |
| 31  | H      | -5.098275 | 2.828185  | -1.161595 |     |        |           |           |           |
| 32  | H      | -5.628654 | 1.776671  | 0.170155  |     |        |           |           |           |
| 33  | H      | -4.720419 | 1.083486  | -1.181693 |     |        |           |           |           |
| 34  | C      | -3.700072 | 3.517633  | 1.098405  |     |        |           |           |           |
| 35  | H      | -2.779494 | 3.762969  | 1.629197  |     |        |           |           |           |
| 36  | H      | -4.491722 | 3.336336  | 1.82711   |     |        |           |           |           |
| 37  | H      | -3.979757 | 4.363819  | 0.462565  |     |        |           |           |           |
| 38  | C      | -1.170246 | 2.817273  | -0.543621 |     |        |           |           |           |
| 39  | C      | -0.29693  | 2.939164  | -1.810855 |     |        |           |           |           |
| 40  | H      | -0.895094 | 2.682195  | -2.692274 |     |        |           |           |           |
| 41  | C      | 0.339388  | 4.342559  | -1.942036 |     |        |           |           |           |
| 42  | H      | 0.433441  | 4.596437  | -3.003957 |     |        |           |           |           |
| 43  | H      | -0.268079 | 5.114282  | -1.463102 |     |        |           |           |           |
| 44  | C      | 2.150962  | 2.770327  | -1.701362 |     |        |           |           |           |
| 45  | H      | 2.624071  | 2.762058  | -2.692916 |     |        |           |           |           |
| 46  | H      | 2.838411  | 2.307943  | -0.99357  |     |        |           |           |           |
| 47  | C      | 0.679103  | 0.70104   | -1.719194 |     |        |           |           |           |
| 48  | C      | 1.727523  | 4.187062  | -1.297894 |     |        |           |           |           |
| 49  | H      | 2.441084  | 4.942474  | -1.63863  |     |        |           |           |           |
| 50  | H      | 1.638423  | 4.251149  | -0.210243 |     |        |           |           |           |
| 51  | C      | 1.928412  | -0.200963 | -1.709001 |     |        |           |           |           |
| 52  | H      | 2.714709  | 0.276105  | -2.297522 |     |        |           |           |           |
| 53  | C      | 3.773557  | -0.154145 | -0.096812 |     |        |           |           |           |
| 54  | C      | 5.417168  | -0.478021 | 1.715435  |     |        |           |           |           |
| 55  | C      | 6.348498  | -1.38688  | 0.904993  |     |        |           |           |           |
| 56  | H      | 5.935858  | -2.399348 | 0.849182  |     |        |           |           |           |
| 57  | H      | 7.324056  | -1.442384 | 1.400289  |     |        |           |           |           |
| 58  | H      | 6.488882  | -1.006929 | -0.107609 |     |        |           |           |           |
| 59  | C      | 5.237557  | -1.022919 | 3.135622  |     |        |           |           |           |
| 60  | H      | 4.546219  | -0.395258 | 3.706294  |     |        |           |           |           |
| 61  | H      | 6.200871  | -1.037305 | 3.65492   |     |        |           |           |           |
| 62  | H      | 4.840832  | -2.042285 | 3.109718  |     |        |           |           |           |
| 63  | C      | 5.907621  | 0.974009  | 1.752328  |     |        |           |           |           |
| 64  | H      | 6.033349  | 1.372783  | 0.744908  |     |        |           |           |           |
| 65  | H      | 6.870414  | 1.020383  | 2.272848  |     |        |           |           |           |

**Calculation Type = FREQ**

Calculation Method = RB3LYP

Basis Set = 6-31+G(d,p)

Charge = 0

Spin = Singlet

E(RB3LYP) = -2272.94624707 a.u.

RMS Gradient Norm = 0.00000205 a.u.

Imaginary Freq = 0

Dipole Moment = 1.9101 Debye

Point Group = C1

Job cpu time: 10 days 6 hours 22 minutes 41.3 seconds.

**Calculation Type = SP**

Calculation Method = RM062X

Basis Set = 6-311++G(2d,3p)

Charge = 0

Spin = Singlet

E(RM062X) = -2272.65152997 a.u.

Dipole Moment = 1.9196 Debye

Point Group = C1

Job cpu time: 1 days 14 hours 33 minutes 9.2 seconds.

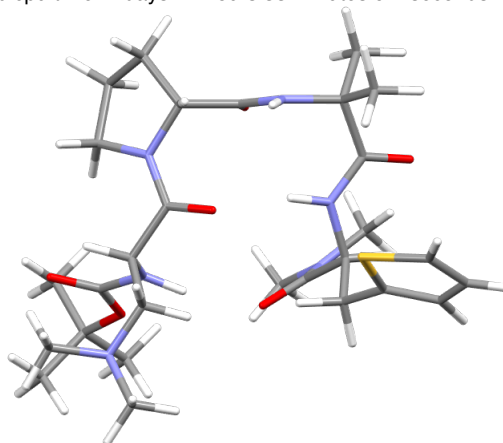

**Table S6.24:** Comparative Energy Data for **29a,b**

| Method                                                  |                                  | Boc-Dmaa-D-Pro-Aib-2-Thi-NMe <sub>2</sub> (29) |                 |
|---------------------------------------------------------|----------------------------------|------------------------------------------------|-----------------|
|                                                         |                                  | 29a                                            | 29b             |
| sp of X-ray crystal structure<br>M06-2X/6-311++G(2d,3p) | E(sp, M06-2X, au)                | -2272.191896760                                | -2272.196580950 |
|                                                         | Relative E(sp, M06-2X, kcal/mol) | 2.94                                           | 0.00            |
|                                                         | Dipole Moment (D)                | 2.689                                          | 2.401           |
| opt of X-ray crystal structure<br>B3LYP/6-31+G(d,p)     | E(opt, B3LYP, au)                | -2272.946247110                                | -2272.946247070 |
|                                                         | ZP Correction (au)               | 0.740439                                       | 0.740443        |
|                                                         | E Correction (au)                | 0.786097                                       | 0.786098        |
|                                                         | H Correction (au)                | 0.787041                                       | 0.787042        |
|                                                         | G Correction (au)                | 0.656491                                       | 0.656516        |
|                                                         | ZPE (au)                         | -2272.205808110                                | -2272.205804070 |
|                                                         | Relative ZPE (kcal/mol)          | 0.00                                           | 0.00            |
|                                                         | E (au)                           | -2272.160150110                                | -2272.160149070 |
|                                                         | Relative E (kcal/mol)            | 0.00                                           | 0.00            |
|                                                         | H (au)                           | -2272.159206110                                | -2272.159205070 |
|                                                         | Relative H (kcal/mol)            | 0.00                                           | 0.00            |
|                                                         | G (au)                           | -2272.289756110                                | -2272.289731070 |
|                                                         | Relative G (kcal/mol)            | 0.00                                           | 0.02            |
|                                                         | S (cal/mol*K)                    | 274.766                                        | 274.716         |
| Relative S(cal/mol*K)                                   | 0.00                             | 0.05                                           |                 |
| Dipole Moment (D)                                       | 1.912                            | 1.910                                          |                 |
| sp of optimized structure<br>M06-2X/6-311++G(2d,3p)     | E(sp, M06-2X, au)                | -2272.651530930                                | -2272.651529970 |
|                                                         | ZPE (au)                         | -2271.911091930                                | -2271.911086970 |
|                                                         | Relative ZPE (kcal/mol)          | 0.00                                           | 0.00            |
|                                                         | E (au)                           | -2271.865433930                                | -2271.865431970 |
|                                                         | Relative E (kcal/mol)            | 0.00                                           | 0.00            |
|                                                         | H (au)                           | -2271.864489930                                | -2271.864487970 |
|                                                         | Relative H (kcal/mol)            | 0.00                                           | 0.00            |
|                                                         | G (au)                           | -2271.995039930                                | -2271.995013970 |
| Relative G (kcal/mol)                                   | 0.00                             | 0.02                                           |                 |
| Dipole Moment (D)                                       | 1.921                            | 1.920                                          |                 |

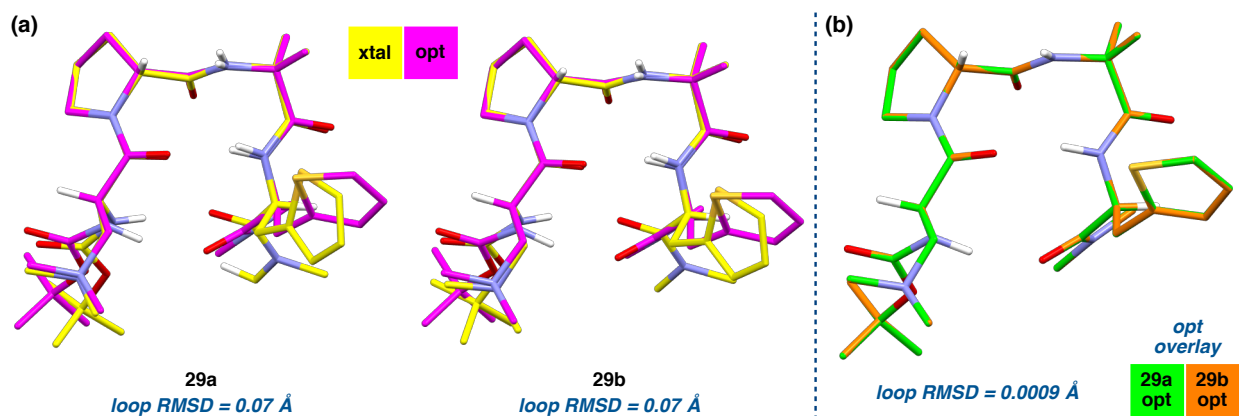

**Figure S6.06:** (a) Overlays of the DFT-optimized structures of **29a,b** with the corresponding crystal structures. (b) An overlay of the two computed structures shows that **29a** and **29b** converged on DFT optimization.

## I. Optimization of Peptide 30

**Table S6.25:** B3LYP/6-31+G(d,p)-Optimized Coordinates of **30**

| Tag | Symbol | X         | Y         | Z         | Tag | Symbol | X         | Y         | Z         |
|-----|--------|-----------|-----------|-----------|-----|--------|-----------|-----------|-----------|
| 1   | O      | 4.447356  | -3.43181  | 0.148726  | 63  | H      | 0.938402  | -1.46848  | 1.243834  |
| 2   | O      | 3.728099  | -2.382677 | -1.719346 | 64  | H      | 1.007388  | -2.127766 | -0.385591 |
| 3   | O      | 5.10058   | 0.01424   | 0.343904  | 65  | C      | 1.340496  | -3.593979 | 1.177508  |
| 4   | O      | 1.842839  | 2.870802  | 1.007263  | 66  | H      | 1.918442  | -4.284573 | 0.548481  |
| 5   | O      | -0.139117 | 0.656304  | -0.598106 | 67  | C      | 1.872466  | -3.707688 | 2.615114  |
| 6   | O      | -4.717679 | 0.442872  | -0.436339 | 68  | H      | 2.945166  | -3.503092 | 2.674904  |
| 7   | O      | -3.91437  | -1.571895 | -1.198336 | 69  | H      | 1.709194  | -4.717479 | 3.0079    |
| 8   | N      | 2.881971  | -0.255888 | -0.018068 | 70  | H      | 1.353608  | -3.005109 | 3.279926  |
| 9   | H      | 2.006428  | 0.120155  | -0.366507 | 71  | C      | -0.13243  | -4.029246 | 1.108752  |
| 10  | N      | 2.648718  | 2.328511  | -1.074326 | 72  | H      | -0.514998 | -3.994235 | 0.082404  |
| 11  | H      | 2.354938  | 2.204104  | -2.033579 | 73  | H      | -0.764304 | -3.37727  | 1.725292  |
| 12  | N      | -0.78184  | 2.794947  | -0.229569 | 74  | H      | -0.256918 | -5.053281 | 1.477749  |
| 13  | N      | -2.613121 | -0.308573 | 0.089002  | 75  | C      | -1.707041 | 0.761405  | 2.174927  |
| 14  | H      | -1.893193 | -0.94862  | -0.223117 | 76  | H      | -1.052736 | -0.116825 | 2.220637  |
| 15  | N      | -2.739715 | 0.622776  | 3.184878  | 77  | H      | -1.090771 | 1.627046  | 2.446956  |
| 16  | C      | 5.251686  | -4.30466  | -0.66757  | 78  | C      | -3.550688 | 1.811834  | 3.39888   |
| 17  | H      | 5.995864  | -3.723419 | -1.216878 | 79  | H      | -2.901524 | 2.684763  | 3.528139  |
| 18  | H      | 4.625472  | -4.851964 | -1.376557 | 80  | H      | -4.133177 | 1.690138  | 4.31854   |
| 19  | H      | 5.735852  | -4.988533 | 0.028988  | 81  | H      | -4.264453 | 2.022071  | 2.580573  |
| 20  | C      | 3.740626  | -2.492828 | -0.51087  | 82  | C      | -3.531401 | -0.601936 | 3.149659  |
| 21  | C      | 2.92207   | -1.630071 | 0.461036  | 83  | H      | -4.301319 | -0.614377 | 2.360954  |
| 22  | H      | 3.437232  | -1.648759 | 1.424516  | 84  | H      | -4.036261 | -0.72416  | 4.115148  |
| 23  | C      | 4.029189  | 0.463677  | -0.066904 | 85  | H      | -2.873171 | -1.46254  | 2.99926   |
| 24  | C      | 4.007705  | 1.858233  | -0.750158 |     |        |           |           |           |
| 25  | C      | 4.743057  | 1.686222  | -2.096569 |     |        |           |           |           |
| 26  | H      | 4.233266  | 0.960011  | -2.740157 |     |        |           |           |           |
| 27  | H      | 5.7542    | 1.319368  | -1.913705 |     |        |           |           |           |
| 28  | H      | 4.802628  | 2.648879  | -2.615834 |     |        |           |           |           |
| 29  | C      | 4.757214  | 2.874653  | 0.129008  |     |        |           |           |           |
| 30  | H      | 4.827674  | 3.831191  | -0.399389 |     |        |           |           |           |
| 31  | H      | 5.762143  | 2.497685  | 0.326544  |     |        |           |           |           |
| 32  | H      | 4.243427  | 3.031803  | 1.077727  |     |        |           |           |           |
| 33  | C      | 1.706941  | 2.797319  | -0.20963  |     |        |           |           |           |
| 34  | C      | 0.424173  | 3.316682  | -0.892259 |     |        |           |           |           |
| 35  | H      | 0.406511  | 3.013723  | -1.947317 |     |        |           |           |           |
| 36  | C      | 0.284662  | 4.847764  | -0.745654 |     |        |           |           |           |
| 37  | H      | 0.793111  | 5.163969  | 0.170853  |     |        |           |           |           |
| 38  | H      | 0.730403  | 5.379695  | -1.589919 |     |        |           |           |           |
| 39  | C      | -1.229566 | 5.07243   | -0.613915 |     |        |           |           |           |
| 40  | H      | -1.478614 | 6.023811  | -0.136192 |     |        |           |           |           |
| 41  | H      | -1.711142 | 5.050718  | -1.598187 |     |        |           |           |           |
| 42  | C      | -1.688736 | 3.868699  | 0.217597  |     |        |           |           |           |
| 43  | H      | -1.558962 | 4.05719   | 1.290929  |     |        |           |           |           |
| 44  | H      | -2.731826 | 3.604767  | 0.031563  |     |        |           |           |           |
| 45  | C      | -0.957758 | 1.457791  | -0.117049 |     |        |           |           |           |
| 46  | C      | -2.15642  | 0.936584  | 0.681575  |     |        |           |           |           |
| 47  | H      | -2.998003 | 1.628222  | 0.635801  |     |        |           |           |           |
| 48  | C      | -3.833224 | -0.400685 | -0.523601 |     |        |           |           |           |
| 49  | C      | -5.142098 | -1.969445 | -1.915869 |     |        |           |           |           |
| 50  | C      | -4.756608 | -3.331764 | -2.49854  |     |        |           |           |           |
| 51  | H      | -3.896386 | -3.236384 | -3.168003 |     |        |           |           |           |
| 52  | H      | -5.595285 | -3.745054 | -3.067438 |     |        |           |           |           |
| 53  | H      | -4.497771 | -4.034741 | -1.701064 |     |        |           |           |           |
| 54  | C      | -6.305622 | -2.110183 | -0.928515 |     |        |           |           |           |
| 55  | H      | -6.037999 | -2.79766  | -0.119435 |     |        |           |           |           |
| 56  | H      | -7.176155 | -2.522704 | -1.449712 |     |        |           |           |           |
| 57  | H      | -6.579691 | -1.145668 | -0.498932 |     |        |           |           |           |
| 58  | C      | -5.443953 | -0.966515 | -3.034606 |     |        |           |           |           |
| 59  | H      | -5.707536 | 0.010964  | -2.628543 |     |        |           |           |           |
| 60  | H      | -6.281164 | -1.334605 | -3.637277 |     |        |           |           |           |
| 61  | H      | -4.575074 | -0.85768  | -3.691955 |     |        |           |           |           |
| 62  | C      | 1.484149  | -2.171024 | 0.60134   |     |        |           |           |           |

### Calculation Type = FREQ

Calculation Method = RB3LYP

Basis Set = 6-31+G(d,p)

Charge = 0

Spin = Singlet

E(RB3LYP) = -1819.62621480 a.u.

RMS Gradient Norm = 0.00000240 a.u.

Imaginary Freq = 0

Dipole Moment = 4.8642 Debye

Point Group = C1

Job cpu time: 4 days 5 hours 47 minutes 9.7 seconds.

### Calculation Type = SP

Calculation Method = RM062X

Basis Set = 6-311++G(2d,3p)

Charge = 0

Spin = Singlet

E(RM062X) = -1819.33477044 a.u.

Dipole Moment = 4.8658 Debye

Point Group = C1

Job cpu time: 1 days 5 hours 2 minutes 34.3 seconds.

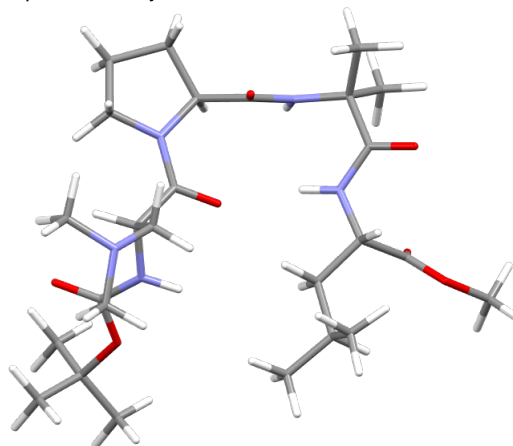

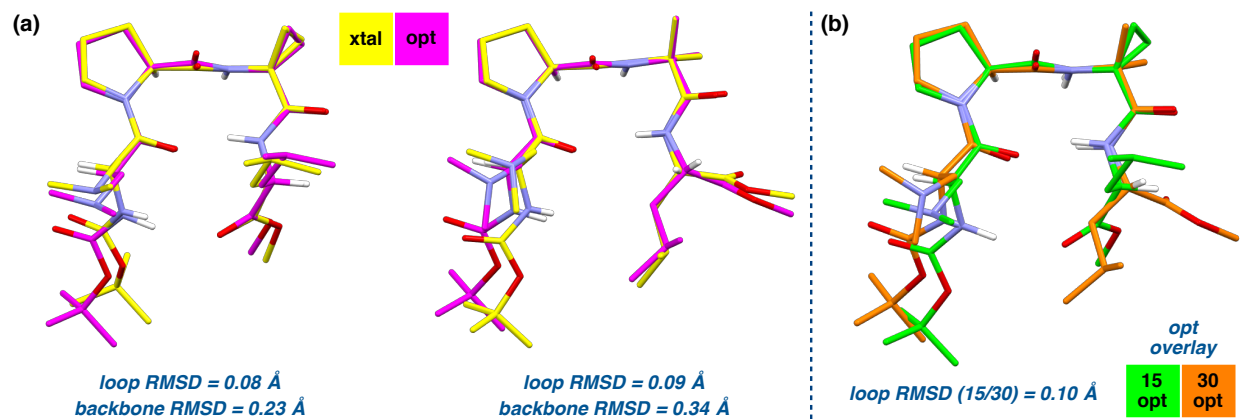

**Figure S6.07:** (a) Overlays of the X-ray crystal structures **15** and **30** with the corresponding DFT-optimized structures. Loop and backbone RMSDs are provided. (b) Overlay of the optimized structures of **15** and **30**.

## VII. Catalyst-Substrate Titration Data

### A. General Information

Data were acquired for this catalyst-substrate titration study according to the NMR methods detailed in Section V. Characterization and NMR spectra of quinazolinones **1** and **38** and mixtures **3+1** and **3+38** are provided in this section.

### B. Complex 3+1

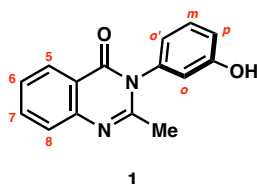

**Full  $^1\text{H-NMR}$  Characterization of Substrate 1** (600 MHz, 0.01 M in  $\text{C}_6\text{D}_6$ , 25 °C):  $\delta$  8.41 (dd,  $J = 7.9, 1.5$  Hz, 1H, **5**), 7.73 (d,  $J = 8.2$  Hz, 1H, **8**), 7.27 (ddd,  $J = 8.4, 7.1, 1.6$  Hz, 1H, **7**), 7.06–6.96 (m, 1H, **6**), 6.94 (t,  $J = 8.0$  Hz, 1H, **m**), 6.68 (dd,  $J = 8.1, 2.4$  Hz, 1H, **o'**), 6.60 (s, 1H, **OH**), 6.39 (t,  $J = 2.2$  Hz, 1H, **o**), 6.18 (dd,  $J = 7.8, 1.9$  Hz, 1H, **p**), 1.89 (s, 3H, **Me**).

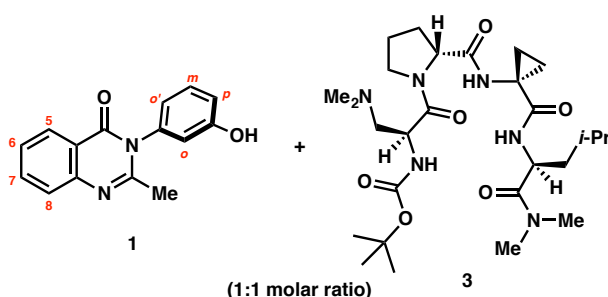

**Full  $^1\text{H-NMR}$  Characterization of 3+1 Complex** (600 MHz, 0.01 M in  $\text{C}_6\text{D}_6$ , 25 °C):  $\delta$  8.46 (dd,  $J = 8.0, 1.5$  Hz, 1H, **5**), 8.10 (d,  $J = 8.8$  Hz, 1H,  $\text{NH}_{\text{Leu}}$ ), 7.76 (d,  $J = 7.9$  Hz, 1H, **8**), 7.67 (s, 1H,  $\text{NH}_{\text{Acpc}}$ ), 7.41 (d,  $J = 8.0$  Hz, 1H,  $\text{NH}_{\text{Dmaa}}$ ), 7.32 (ddd,  $J = 8.4, 7.1, 1.5$  Hz, 1H, **7**), 7.13–7.09 (m, 1H, **6**), 7.06–6.97 (m, 1H, **m**), 6.89 (ddd,  $J = 8.4, 2.4, 1.1$  Hz, 1H, **o'**), 6.73 (q,  $J = 2.4$  Hz, 1H, **o**), 6.26–6.20 (m, 1H, **p**), 5.15 (td,  $J = 9.4, 4.8$  Hz, 1H,  $\alpha_{\text{Leu}}$ ), 4.69 (dd,  $J = 14.5, 6.4$  Hz, 1H,  $\alpha_{\text{Dmaa}}$ ), 3.98 (dd,  $J = 8.3, 4.5$  Hz, 1H,  $\alpha_{\text{D-Pro}}$ ), 3.77 (q,  $J = 7.4$  Hz, 1H,  $\delta_{\text{D-Pro}}$ ), 3.40 (dt,  $J = 9.8, 6.6$  Hz, 1H,  $\delta'_{\text{D-Pro}}$ ), 3.14 (t,  $J = 10.8$  Hz, 1H,  $\beta_{\text{Dmaa}}$ ), 2.69 (s, 3H,  $\text{NMe}_{\text{Leu}}$ ), 2.58 (s, 3H,  $\text{NMe}'_{\text{Leu}}$ ), 2.39 (dd,  $J = 12.2, 4.7$  Hz, 1H,  $\beta'_{\text{Dmaa}}$ ), 2.08 (s, 6H, 2x  $\text{NMe}_{\text{Dmaa}}$ ), 2.05 (s, 3H, **Me**), 2.03–1.92 (m, 1H,  $\beta_{\text{Leu}}$ ), 1.92 (dd,  $J = 13.1, 3.1$  Hz, 1H,  $\beta_{\text{Acpc}}$ ), 1.91–1.83 (m, 1H,  $\beta'_{\text{Acpc}}$ ), 1.74–1.63 (m, 3H,  $\gamma_{\text{Leu}} + \beta_{\text{D-Pro}} + \gamma_{\text{D-Pro}}$ ), 1.50 (s, 9H,  $t\text{-Bu}_{\text{Dmaa}}$ ), 1.48–1.38 (m, 2H,  $\beta'_{\text{Leu}} + \beta'_{\text{D-Pro}}$ ), 1.39–1.20 (m, 1H,  $\gamma'_{\text{D-Pro}}$ ), 1.16–1.01 (m, 2H,  $\beta''_{\text{Acpc}}$ ), 0.83 (d,  $J = 6.6$  Hz, 6H,  $\delta_{\text{Leu}}$ ). **\*Note:** Quinazolinone **1** is completely soluble in  $\text{C}_6\text{D}_6$  in the presence of equimolar **3**, while it is only partially soluble alone at 0.01 M in  $\text{C}_6\text{D}_6$ .

**<sup>1</sup>H-NMR (600 MHz, 0.01 M in C<sub>6</sub>D<sub>6</sub>, 25 °C)**

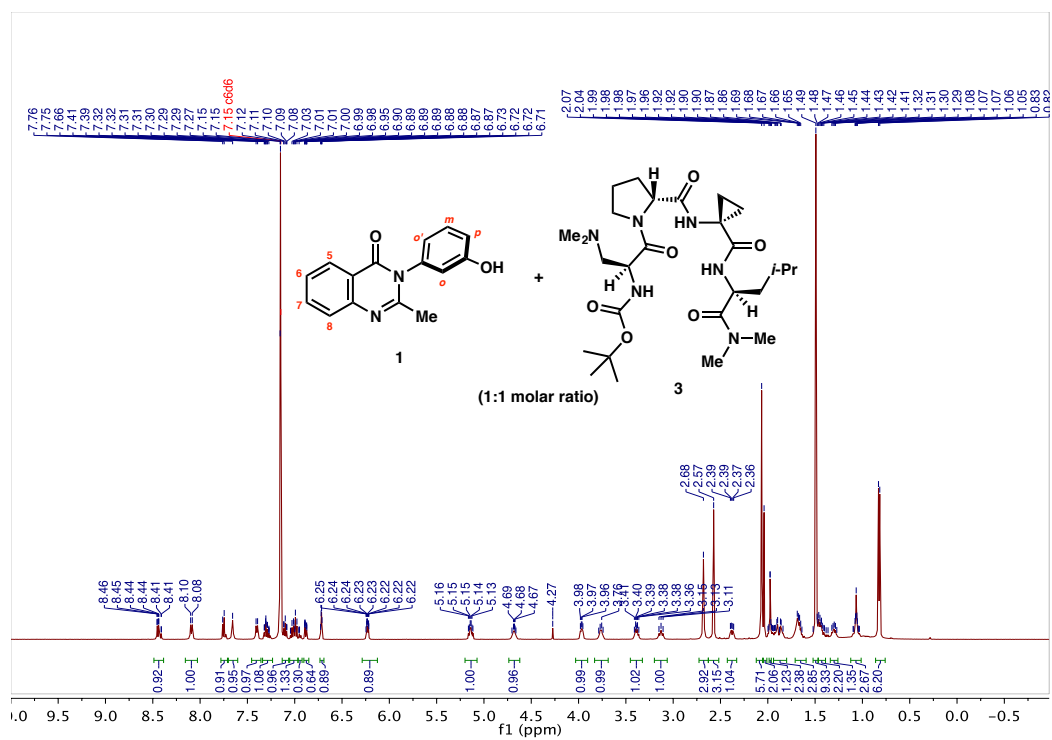

**COSY (600 MHz, 0.01 M in C<sub>6</sub>D<sub>6</sub>, 25 °C)**

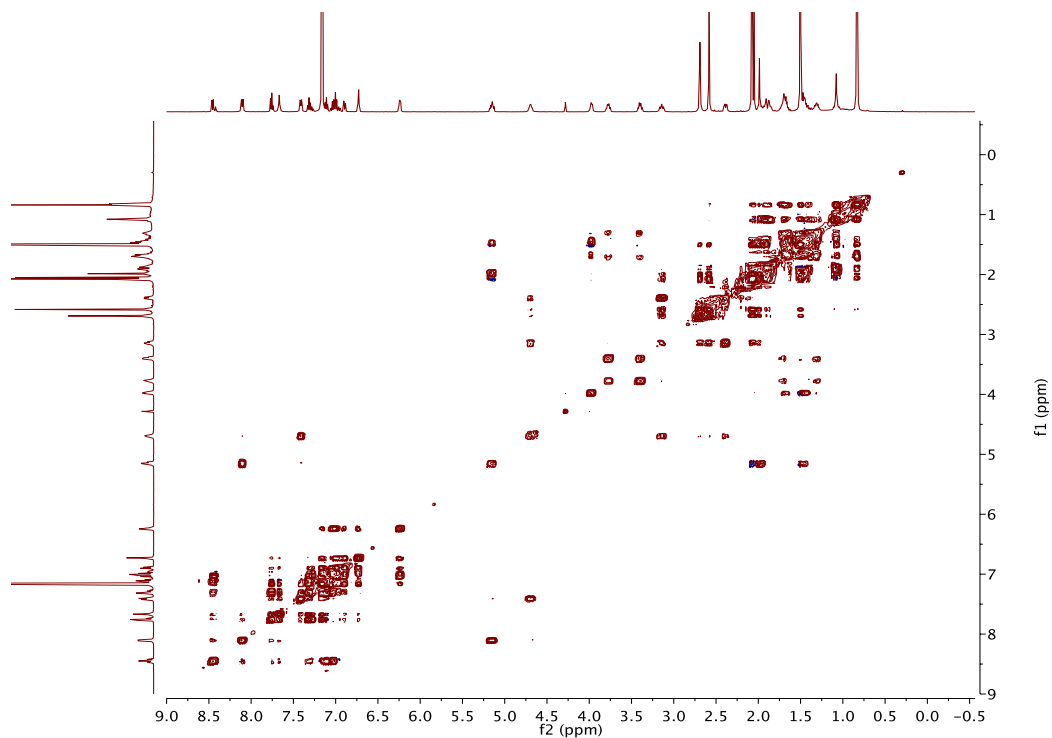

NOESY (600 MHz, 0.01 M in C<sub>6</sub>D<sub>6</sub>, 25 °C)

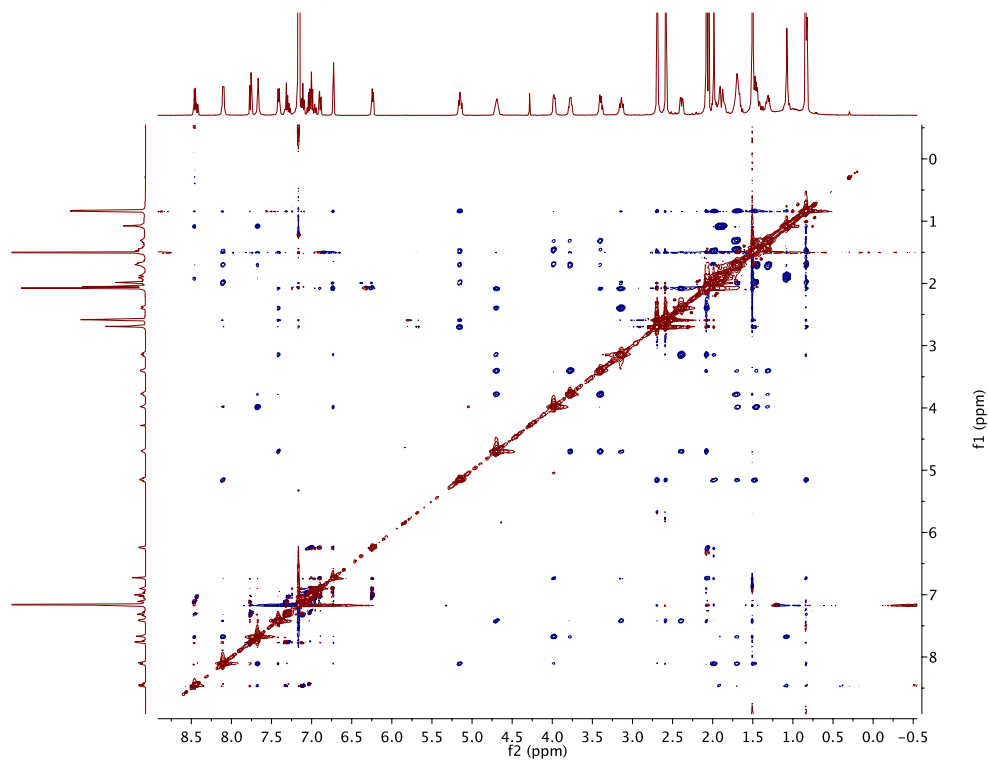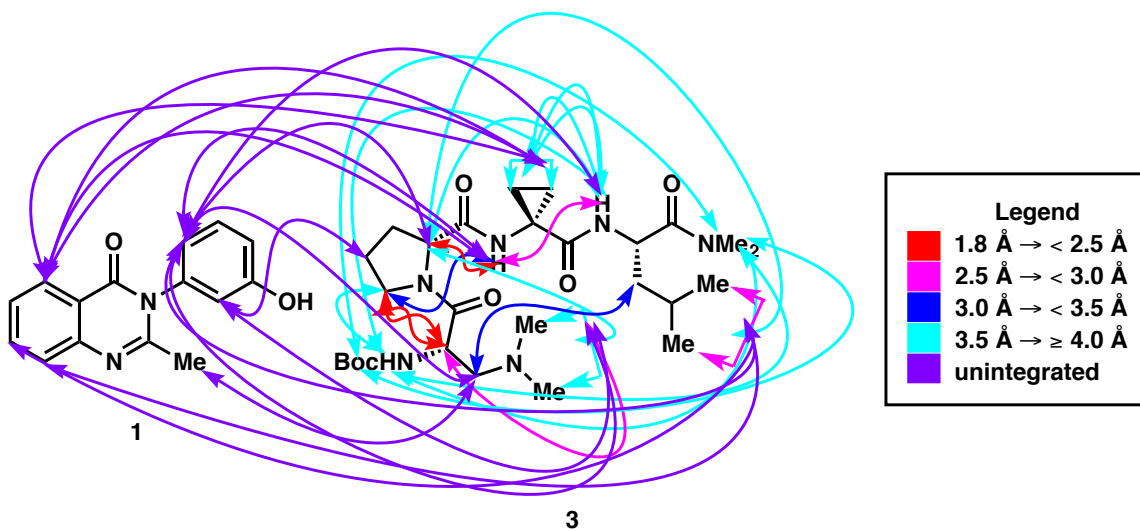

Figure S7.01: Inter-residue and Intermolecular nOe Map for Peptide 3+1



**Table S7.02:** Integrated NOESY Cross-peaks for Peptide 3+1

|    | f2   | f1   | Normalized | Absolute | Assignment      | Distance (Absolute) |
|----|------|------|------------|----------|-----------------|---------------------|
| 1  | 8.1  | 1.91 | -0.02      | -0.05    | LeuNH-AcpcHB2b  | 4.71                |
|    | 1.91 | 8.11 | -0.02      | -0.05    |                 |                     |
| 2  | 8.1  | 2.58 | -0.05      | -0.11    | LeuNH-LeuNMe1   | 4.13                |
|    | 2.57 | 8.11 | -0.05      | -0.11    |                 |                     |
| 3  | 8.1  | 1.08 | -0.03      | -0.07    | LeuNH-AcpcHB1   | 4.51                |
|    | 1.08 | 8.1  | -0.03      | -0.06    |                 |                     |
| 4  | 8.1  | 1.87 | -0.03      | -0.06    | LeuNH-AcpcHB2a  | 4.57                |
|    | 1.86 | 8.11 | -0.03      | -0.06    |                 |                     |
| 5  | 8.1  | 2.69 | -0.04      | -0.08    | LeuNH-LeuNMe2   | 4.35                |
|    | 2.69 | 8.11 | -0.04      | -0.08    |                 |                     |
| 6  | 8.1  | 2.08 | -0.04      | -0.09    | LeuNH-DmaaMe    | 4.27                |
|    | 2.09 | 8.11 | -0.05      | -0.09    |                 |                     |
| 7  | 8.1  | 1.69 | -0.52      | -1.08    | LeuNH-LeuHC     | 2.82                |
|    | 1.69 | 8.1  | -0.51      | -1.07    |                 |                     |
| 8  | 8.1  | 7.67 | -1         | -2.08    | LeuNH-AcpcNH    | 2.53                |
|    | 7.67 | 8.1  | -1         | -2.09    |                 |                     |
| 9  | 8.1  | 1.98 | -1.04      | -2.18    | LeuNH-LeuHB2    | 2.51                |
|    | 1.98 | 8.11 | -1.06      | -2.2     |                 |                     |
| 10 | 8.1  | 3.98 | -0.11      | -0.24    | LeuNH-DProHA    | 3.61                |
|    | 3.97 | 8.1  | -0.12      | -0.25    |                 |                     |
| 11 | 8.1  | 7.41 | -0.1       | -0.2     | LeuNH-DmaaNH    | 3.69                |
|    | 7.41 | 8.1  | -0.11      | -0.23    |                 |                     |
| 12 | 7.67 | 3.78 | -0.15      | -0.31    | AcpcNH-DProHD2  | 3.45                |
|    | 3.77 | 7.67 | -0.16      | -0.33    |                 |                     |
| 13 | 7.67 | 1.88 | -0.01      | -0.02    | AcpcNH-AcpcHB2a | 5.28                |
|    | 1.87 | 7.67 | -0.02      | -0.03    |                 |                     |
| 14 | 7.67 | 1.91 | -0.03      | -0.07    | AcpcNH-AcpcHB2b | 4.51                |
|    | 1.91 | 7.67 | -0.03      | -0.06    |                 |                     |
| 15 | 7.67 | 2.08 | -0.02      | -0.04    | AcpcNH-DmaaMe   | 4.71                |
|    | 2.08 | 7.66 | -0.03      | -0.06    |                 |                     |
| 16 | 7.66 | 3.97 | -2.59      | -5.4     | AcpcNH-DProHA   | 2.16                |
|    | 3.97 | 7.67 | -2.61      | -5.43    |                 |                     |
| 17 | 7.42 | 2.08 | -0.18      | -0.37    | DmaaNH-DmaaMe   | 3.42                |
|    | 2.07 | 7.4  | -0.15      | -0.31    |                 |                     |
| 18 | 7.41 | 2.59 | -0.21      | -0.43    | DmaaNH-LeuNMe1  | 3.28                |
|    | 2.58 | 7.41 | -0.21      | -0.44    |                 |                     |

|    |      |      |       |       |                |      |
|----|------|------|-------|-------|----------------|------|
| 19 | 7.41 | 2.39 | -0.51 | -1.06 | DmaaNH-DmaaHB1 | 2.83 |
|    | 2.38 | 7.41 | -0.51 | -1.07 |                |      |
| 20 | 7.41 | 3.79 | -0.06 | -0.13 | DmaaNH-DProHD2 | 3.99 |
|    | 3.77 | 7.41 | -0.07 | -0.14 |                |      |
| 21 | 7.41 | 2.69 | -0.03 | -0.07 | DmaaNH-LeuNMe2 | 4.45 |
|    | 2.69 | 7.41 | -0.03 | -0.07 |                |      |
| 22 | 7.41 | 3.15 | -0.47 | -0.99 | DmaaNH-DmaaHB2 | 2.86 |
|    | 3.14 | 7.41 | -0.47 | -0.98 |                |      |
| 23 | 5.15 | 0.83 | -2.01 | -4.19 | LeuHA-LeuHD    | 2.25 |
|    | 0.83 | 5.15 | -2    | -4.18 |                |      |
| 24 | 5.15 | 2.58 | -0.43 | -0.89 | LeuHA-LeNMe1   | 2.93 |
|    | 2.58 | 5.15 | -0.4  | -0.84 |                |      |
| 25 | 5.15 | 2.69 | -2.59 | -5.4  | LeuHA-LeuNMe2  | 2.16 |
|    | 2.69 | 5.15 | -2.61 | -5.43 |                |      |
| 26 | 4.69 | 3.77 | -1.76 | -3.68 | DmaaHA-DProHD2 | 2.30 |
|    | 3.77 | 4.7  | -1.77 | -3.7  |                |      |
| 27 | 4.69 | 2.07 | -1.68 | -3.51 | DmaaHA-DmaaMe  | 2.32 |
|    | 2.08 | 4.69 | -1.68 | -3.5  |                |      |
| 28 | 4.68 | 3.39 | -2.4  | -5    | DmaaHA-DProHD1 | 2.19 |
|    | 3.39 | 4.69 | -2.39 | -4.99 |                |      |
| 29 | 3.98 | 2.08 | -0.03 | -0.06 | DProHA-DmaaMe  | 4.57 |
|    | 2.08 | 3.98 | -0.03 | -0.06 |                |      |
| 30 | 3.98 | 0.84 | -0.07 | -0.14 | DProHA-LeuHD   | 3.96 |
|    | 0.83 | 3.98 | -0.07 | -0.14 |                |      |
| 31 | 3.98 | 1.08 | -0.02 | -0.05 | DProHA-AcpCHB1 | 4.79 |
|    | 1.08 | 3.98 | -0.02 | -0.04 |                |      |
| 32 | 3.97 | 1.31 | -0.28 | -0.59 | DProHA-DProHC1 | 3.12 |
|    | 1.31 | 3.97 | -0.28 | -0.59 |                |      |
| 33 | 3.97 | 3.4  | -0.1  | -0.21 | DProHA-DProHD1 | 3.71 |
|    | 3.39 | 3.98 | -0.1  | -0.21 |                |      |
| 34 | 3.4  | 1.45 | -0.27 | -0.57 | DProHD1-LeuHB1 | 3.12 |
|    | 1.45 | 3.4  | -0.29 | -0.61 |                |      |
| 35 | 3.14 | 1.98 | -0.27 | -0.56 | DmaaHB2-LeuHB2 | 3.14 |
|    | 1.98 | 3.14 | -0.28 | -0.58 |                |      |
| 36 | 3.14 | 2.08 | -1.75 | -3.64 | DmaaHB2-DmaaMe | 2.30 |
|    | 2.08 | 3.14 | -1.77 | -3.68 |                |      |
| 37 | 3.13 | 0.84 | -0.12 | -0.25 | DmaaHB2-LeuHD  | 3.58 |
|    | 0.83 | 3.14 | -0.13 | -0.27 |                |      |

|    |      |      |       |        |                 |      |
|----|------|------|-------|--------|-----------------|------|
| 38 | 2.69 | 0.83 | -0.41 | -0.85  | LeuNMe2-LeuHD   | 2.92 |
|    | 0.83 | 2.69 | -0.43 | -0.9   |                 |      |
| 39 | 2.68 | 1.45 | -0.15 | -0.32  | LeuNMe2-LeuHB1  | 3.42 |
|    | 1.46 | 2.69 | -0.17 | -0.36  |                 |      |
| 40 | 2.68 | 1.51 | -0.2  | -0.42  | LeuNMe2-BocMe   | 3.28 |
|    | 1.5  | 2.69 | -0.22 | -0.46  |                 |      |
| 41 | 2.58 | 1.51 | -0.46 | -0.96  | LeuNMe1-BocMe   | 2.87 |
|    | 1.5  | 2.58 | -0.48 | -1     |                 |      |
| 42 | 2.38 | 1.5  | -0.15 | -0.32  | DmaaHB1-BocMe   | 3.37 |
|    | 1.5  | 2.39 | -0.2  | -0.42  |                 |      |
| 43 | 2.06 | 0.83 | -0.42 | -0.88  | DmaaHB1-DmaaMe  | 2.92 |
|    | 0.83 | 2.07 | -0.42 | -0.87  |                 |      |
| 44 | 3.77 | 3.39 | -7.67 | -15.97 | DProHD1-DProHD2 | 1.80 |
|    | 3.39 | 3.77 | -7.68 | -16    |                 |      |

### C. Complex 3+38

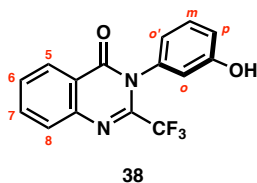

**Full  $^1\text{H-NMR}$  Characterization of Substrate 38:** (600 MHz, 0.01 M in  $\text{C}_6\text{D}_6$ , 25  $^\circ\text{C}$ )  $\delta$  8.23 (dd,  $J = 8.0, 1.5$  Hz, 1H, **5**), 7.65 (dt,  $J = 8.1, 0.8$  Hz, 1H, **8**), 7.16–7.13 (m, 1H, **7**), 6.97 (ddd,  $J = 8.2, 7.3, 1.2$  Hz, 1H, **6**), 6.92 (t,  $J = 8.1$  Hz, 1H, **m**), 6.52 (ddd,  $J = 8.3, 2.4, 0.9$  Hz, 1H, **o'**), 6.45 (ddt,  $J = 7.9, 2.0, 1.0$  Hz, 1H, **OH**), 6.41 (d,  $J = 2.3$  Hz, 1H, **o**), 5.10 (s, 1H, **p**).

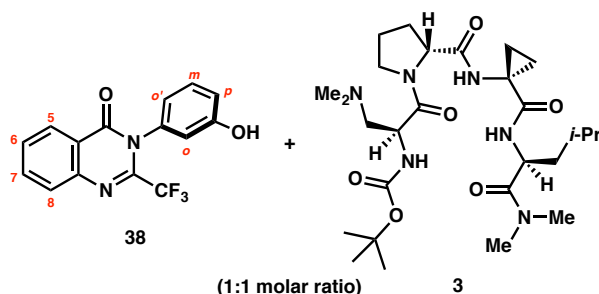

**Full  $^1\text{H-NMR}$  Characterization of 3+38 Complex** (600 MHz, 0.01 M in  $\text{C}_6\text{D}_6$ , 25  $^\circ\text{C}$ ):  $\delta$  8.30 (dd,  $J = 41.2, 8.3$  Hz, 1H, **5**), 8.12 (d,  $J = 8.7$  Hz, 1H,  $\text{NH}_{\text{Leu}}$ ), 7.68 (dd,  $J = 15.6, 8.1$  Hz, 1H, **8**), 7.47–7.36 (m, 1H,  $\text{NH}_{\text{Dmaa}}$ ), 7.24–7.18 (m, 1H, **7**), 7.13–7.07 (m, 1H, **6**), 7.07–6.98 (m, 1H, **m**), 6.96–6.90 (m, 2H, **o'**, **p**), 6.89 (s, 1H,  $\text{NH}_{\text{Acpc}}$ ), 6.48 (dd,  $J = 31.2, 7.7$  Hz, 1H, **o**), 5.08 (td,  $J = 9.5, 4.9$  Hz, 1H,  $\alpha_{\text{Leu}}$ ), 4.79–4.63 (m, 1H,  $\alpha_{\text{Dmaa}}$ ), 3.99–3.86 (m, 1H,  $\alpha_{\text{D-Pro}}$ ), 3.76 (t,  $J = 9.8, 6.6$  Hz, 1H,  $\delta_{\text{D-Pro}}$ ), 3.51–3.34 (m, 1H,  $\delta'_{\text{D-Pro}}$ ), 3.22–3.05 (m, 1H,  $\beta_{\text{Dmaa}}$ ), 2.68 (s, 3H,  $\text{NMe}_{\text{Leu}}$ ), 2.57 (s, 3H,  $\text{NMe}'_{\text{Leu}}$ ), 2.37–2.31 (m, 1H,  $\beta'_{\text{Dmaa}}$ ), 2.07 (s, 6H, 2x  $\text{NMe}_{\text{Dmaa}}$ ), 1.93–1.82 (m, 3H,  $\beta_{\text{Leu}}$ ,  $\beta_{\text{Acpc}}$ ,  $\beta'_{\text{Acpc}}$ ), 1.77–1.69 (m, 1H,  $\gamma_{\text{Leu}}$ ), 1.69–1.58 (m, 1H,  $\beta_{\text{D-Pro}}$ ), 1.50 (s, 9H,  $t\text{-Bu}_{\text{Dmaa}}$ ), 1.48–1.37 (m, 3H,  $\gamma_{\text{D-Pro}}$ ,  $\beta'_{\text{Leu}}$ ,  $\beta'_{\text{D-Pro}}$ ), 1.37–1.25 (m, 1H,  $\gamma'_{\text{D-Pro}}$ ), 1.14–0.95 (m, 2H,  $\beta''_{\text{Acpc}}$ ), 0.86–0.63 (m, 6H,  $\delta_{\text{Leu}}$ ).



NOESY (600 MHz, 0.01 M in C<sub>6</sub>D<sub>6</sub>, 25 °C)

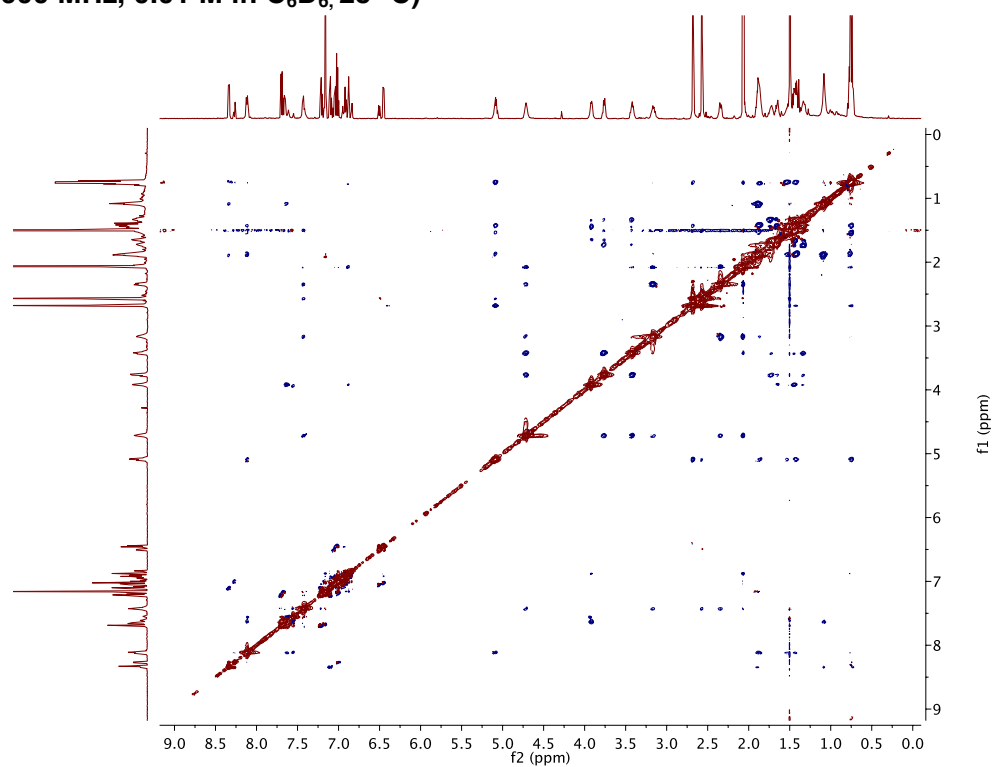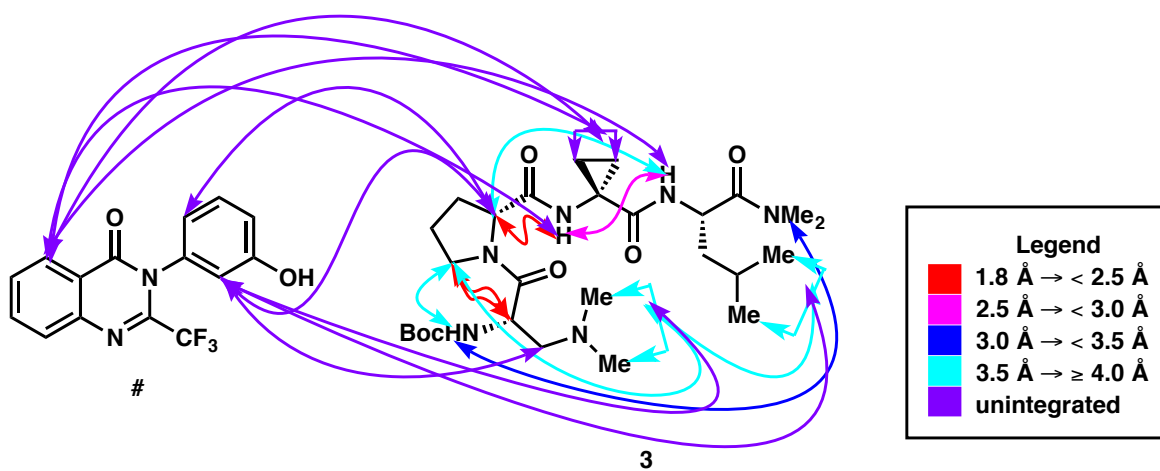

Figure S7.02: Inter-residue and Intermolecular nOe Map for Peptide 3+38

**Table S7.02:** Integrated NOESY Cross-peaks for Peptide **3+38**

|    | <b>f2</b> | <b>f1</b> | <b>Normalized</b> | <b>Absolute</b> | <b>Assignment</b> | <b>Distance (Absolute)</b> |
|----|-----------|-----------|-------------------|-----------------|-------------------|----------------------------|
| 1  | 8.12      | 1.55      | -0.51             | -0.46           | LeuNH-LeuHC       | 3.13                       |
|    | 1.54      | 8.12      | -0.53             | -0.48           |                   |                            |
| 2  | 8.12      | 7.64      | -0.85             | -0.77           | LeuNH-AcpcNH      | 2.85                       |
|    | 7.64      | 8.12      | -0.99             | -0.9            |                   |                            |
| 3  | 8.12      | 2.68      | -0.16             | -0.15           | LeuNH-LeuNMe2     | 4.21                       |
|    | 2.68      | 8.12      | -0.01             | -0.01           |                   |                            |
| 4  | 8.12      | 3.92      | -0.21             | -0.19           | LeuNH-DProHA      | 3.66                       |
|    | 3.92      | 8.12      | -0.2              | -0.18           |                   |                            |
| 5  | 7.63      | 3.92      | -3.96             | -3.59           | AcpcNH-DProHA     | 2.23                       |
|    | 3.92      | 7.63      | -3.98             | -3.61           |                   |                            |
| 6  | 7.63      | 1.08      | -1.43             | -1.3            | AcpcNH-AcpcHB2    | 2.58                       |
|    | 1.08      | 7.65      | -1.88             | -1.71           |                   |                            |
| 7  | 7.42      | 3.77      | -0.2              | -0.18           | DmaaNH-DProHD2    | 3.71                       |
|    | 3.76      | 7.43      | -0.18             | -0.16           |                   |                            |
| 8  | 7.42      | 3.17      | -1.09             | -0.99           | DmaaNH-DmaaHB2    | 2.77                       |
|    | 3.15      | 7.43      | -1.1              | -1              |                   |                            |
| 9  | 7.42      | 2.35      | -1.15             | -1.04           | DmaaNH-DmaaHB1    | 2.74                       |
|    | 2.35      | 7.42      | -1.19             | -1.08           |                   |                            |
| 10 | 7.42      | 2.57      | -0.57             | -0.51           | DmaaNH-LeuNMe1    | 3.03                       |
|    | 2.58      | 7.44      | -0.7              | -0.64           |                   |                            |
| 11 | 5.09      | 2.68      | -4.61             | -4.18           | LeuHA-LeuNMe2     | 2.17                       |
|    | 2.69      | 5.08      | -4.71             | -4.27           |                   |                            |
| 12 | 5.09      | 0.75      | -3.61             | -3.28           | LeuHA-LeuHD       | 2.27                       |
|    | 0.76      | 5.1       | -3.48             | -3.16           |                   |                            |
| 13 | 5.09      | 2.57      | -0.43             | -0.39           | LeuHA-LeuNMe1     | 3.23                       |
|    | 2.57      | 5.09      | -0.43             | -0.39           |                   |                            |
| 14 | 5.09      | 1.54      | -0.99             | -0.9            | LeuHA-LeuHC       | 2.93                       |
|    | 1.53      | 5.08      | -0.57             | -0.52           |                   |                            |
| 15 | 4.71      | 3.76      | -3.57             | -3.24           | DmaaHA-DProHD2    | 2.27                       |
|    | 3.76      | 4.71      | -3.55             | -3.22           |                   |                            |
| 16 | 4.71      | 3.42      | -4.8              | -4.35           | DmaaHA-DProHD1    | 2.16                       |
|    | 3.42      | 4.71      | -4.88             | -4.42           |                   |                            |
| 17 | 4.71      | 2.07      | -3.96             | -3.59           | DmaaHA-DmaaMe     | 2.23                       |
|    | 2.08      | 4.71      | -4.11             | -3.73           |                   |                            |
| 18 | 3.92      | 1.34      | -0.55             | -0.5            | DProHA-DProHC1    | 3.09                       |
|    | 1.33      | 3.92      | -0.59             | -0.53           |                   |                            |

|    |      |      |        |        |                 |      |
|----|------|------|--------|--------|-----------------|------|
| 19 | 3.76 | 1.65 | -0.65  | -0.59  | DProHD2-DProHB2 | 3.01 |
|    | 1.65 | 3.76 | -0.67  | -0.61  |                 |      |
| 20 | 3.42 | 2.07 | -0.69  | -0.62  | DProHD1-DmaaMe  | 2.92 |
|    | 2.08 | 3.42 | -0.92  | -0.83  |                 |      |
| 21 | 3.17 | 2.08 | -4.48  | -4.06  | DmaaHB2-DmaaMe  | 2.17 |
|    | 2.08 | 3.16 | -5.05  | -4.58  |                 |      |
| 22 | 2.68 | 0.75 | -0.85  | -0.77  | LeuNMe-LeuHD    | 2.76 |
|    | 0.76 | 2.66 | -1.38  | -1.26  |                 |      |
| 23 | 2.34 | 2.06 | -3.19  | -2.89  | DmaaHB1-DmaaMe  | 2.31 |
|    | 2.08 | 2.33 | -3.23  | -2.93  |                 |      |
| 24 | 2.06 | 0.77 | -0.74  | -0.67  | DmaaMe-LeuHD    | 2.93 |
|    | 0.75 | 2.08 | -0.82  | -0.74  |                 |      |
| 25 | 1.43 | 0.76 | -3.81  | -3.45  | LeuHB1-LeuHD    | 2.24 |
|    | 0.75 | 1.43 | -3.94  | -3.57  |                 |      |
| 26 | 3.76 | 3.42 | -14.34 | -13    | DProHD1-DProHD2 | 1.80 |
|    | 3.41 | 3.76 | -14.53 | -13.18 |                 |      |

#### D. Chemical Shift Analysis of 3+1 and 3+38

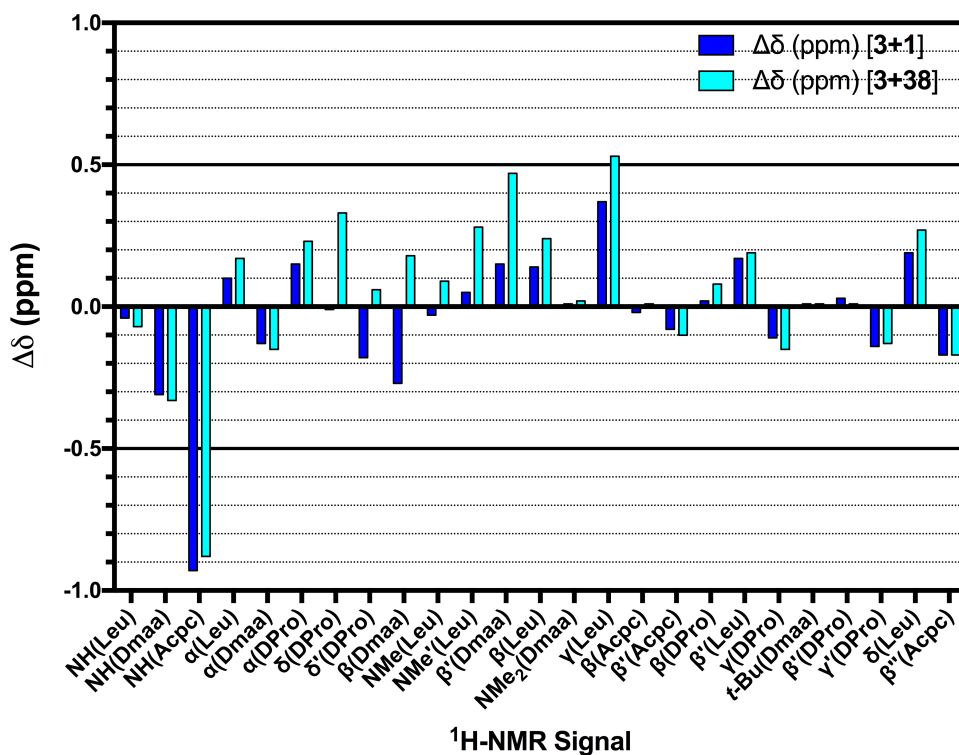

**Figure S7.03:** Chemical shift analysis of peptide **3** in complexes **3+1** and **3+38**. Negative  $\Delta\delta$  values indicate downfield shifts.



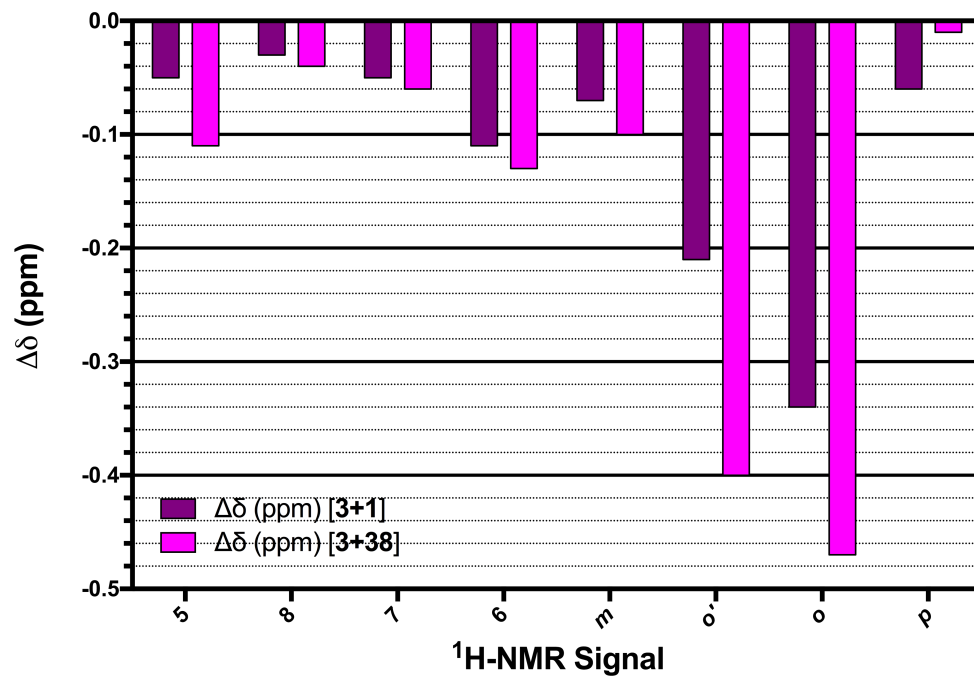

**Figure S7.04:** Chemical shift analysis of quinazolinones **1** and **38** in complexes **3+1** and **3+38**. Negative  $\Delta\delta$  values indicate downfield shifts.

## VIII. Atroposelective Bromination Data

### A. Synthesis of 3-Arylquinazolinone **1**<sup>4,5</sup>

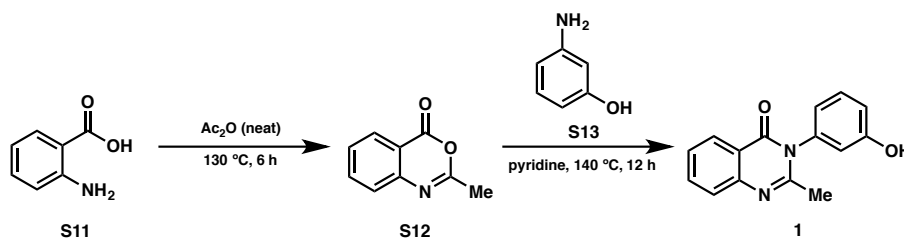

**2-Methyl-4H-benzo-[d][1,3]oxazin-4-one (S12):**<sup>42</sup> Anthranilic acid (**S11**, 8.23 g, 60.0 mmol) was added to an oven-dried 40 mL sealed tube (thick-walled) equipped with a magnetic stir bar. The off-white solid was suspended in acetic anhydride (36 mL, 380 mmol), and the vessel was purged with nitrogen, sealed tightly, and submerged into an oil bath at  $130\text{ }^\circ\text{C}$ . The cloudy suspension quickly became a clear, deep yellow solution, which was allowed to stir at  $130\text{ }^\circ\text{C}$  for 6 h. The reaction solution was allowed to cool to room temperature, and the contents of the sealed tube were transferred to a round bottom flask washing with copious PhMe. Removal of solvent under reduced pressure yielded benzoxazinone **S12** (9.50 g, 98% yield) which was used without further purification.

**3-(3-Hydroxyphenyl)-2-methylquinazolin-4(3H)-one (1):**<sup>43</sup> Benzoxazinone **S12** (2.99 g, 18.6 mmol) and *m*-aminophenol (**S13**, 2.43 g, 22.3 mmol) were added to an oven-dried 40 mL sealed tube (thick-walled) equipped with a magnetic stir bar. The solid mixture was dissolved in pyridine (16.7 mL, 1.2 M w.r.t. **S12**). The vessel was purged with nitrogen, sealed tightly, and submerged in an oil bath at  $145\text{ }^\circ\text{C}$ . The cloudy, deep red suspension began to clarify upon heating. The deep red solution was allowed to stir for 12 h at  $145\text{ }^\circ\text{C}$ , after which the vessel was cooled to room temperature. The contents of the sealed tube were transferred to a round bottom flask, washing with copious PhMe, and the solvent was removed under reduced pressure. The crude product was purified by automated flash chromatography using a gradient of 10–100% EtOAc/hexanes. Fractions were pooled and concentrated *in vacuo* to provide a pale yellow solid, which was suspended in hot  $\text{CH}_2\text{Cl}_2$  and vacuum filtered to remove insoluble side-products. The filtrate was allowed to cool to  $0\text{ }^\circ\text{C}$ , precipitating 2.56 g (61% yield) of pure **1** as a white solid. **TLC:**  $R_f = 0.21$  (50% EtOAc/hexanes). **IR** (FT-ATR,  $\text{cm}^{-1}$ ): 3310, 3090, 2819, 1661, 1591, 1570, 1291, 1112, 933. **<sup>1</sup>H-NMR** (400 MHz,  $\text{DMSO}-d_6$ ):  $\delta$  9.85 (s, 1H), 8.10 (dd,  $J = 7.9, 1.5$  Hz, 1H), 7.84 (ddd,  $J = 8.4, 7.1, 1.6$  Hz, 1H), 7.66 (dd,  $J = 8.3, 1.1$  Hz, 1H), 7.52 (ddd,  $J = 8.3, 7.2, 1.2$  Hz, 1H), 7.36 (t,  $J = 8.0$  Hz, 1H), 6.92 (ddd,  $J = 8.3, 2.4, 1.0$  Hz, 1H), 6.84 (ddd,  $J = 7.8, 2.0, 0.9$  Hz, 1H), 6.80 (t,  $J = 2.1$  Hz, 1H), 2.17 (s, 3H). **<sup>13</sup>C-NMR** (151 MHz,  $\text{DMSO}-d_6$ ):  $\delta$  161.6, 158.7, 154.9, 147.7, 139.2, 134.9, 130.7, 127.1, 126.8, 126.7, 120.9, 119.2, 116.4, 115.8, 24.2. **HRMS:** Exact mass calculated for  $[\text{C}_{15}\text{H}_{12}\text{N}_2\text{O}_2 + \text{H}]^+$  requires  $m/z = 253.0977$ . Found 253.0975 (ESI+).

## B. Peptide Screening Procedure<sup>4,5</sup>

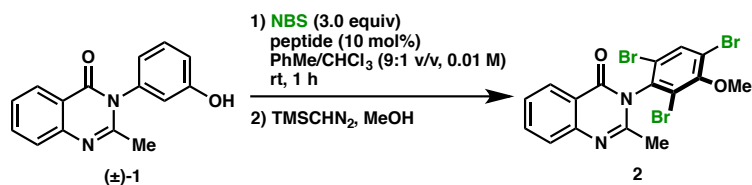

To an oven-dried 20 mL vial equipped with a magnetic stir bar was added 3-(3-hydroxyphenyl)-2-methylquinazolin-4(3H)-one (**1**, 12.6 mg, 0.050 mmol) and peptide catalyst (0.005 mmol, 10 mol% w.r.t. **1**). The solid mixture was suspended in 5 mL of PhMe/CHCl<sub>3</sub> (9:1 v/v, 0.01 M w.r.t. **1**), and the resulting suspension was allowed to stir vigorously at rt. *N*-Bromosuccinimide (NBS, 26.7 mg, 0.15 mmol, 3.0 equiv w.r.t. **1**) was added in one portion to the stirring solution at rt. The vial was sealed with a cap, and the reaction solution was allowed to stir for 60 minutes. (Note: A color change from colorless to yellow was observed within 15 minutes. In some cases, the clear yellow or pale yellow reaction solutions turned cloudy.) The reaction was quenched by addition of 1 mL of MeOH followed by (trimethylsilyl)diazomethane solution (TMSCHN<sub>2</sub>, 2.0 M in hexanes) until the bright yellow color persisted in solution (Note: the yellow reaction solution became clear and colorless before turning bright yellow). The solution was allowed to stir 15–20 minutes at rt, after which glacial acetic acid was added dropwise until the solution became clear and colorless. The solvent was removed *in vacuo*, and the crude reaction mixture was purified by flash chromatography through a pipette silica plug (1 x 6 cm SiO<sub>2</sub>) washing with EtOAc/hexanes (1:1 v/v). The fractions were pooled and concentrated *in vacuo*. The resulting white foam (or clear oil) was dried thoroughly on high vacuum to provide 3-(2,4,6-tribromo-3-methoxyphenyl)-2-methylquinazolin-4(3H)-one (**2**), which was analyzed by chiral HPLC to assess the enantioselectivity of the reaction. **Chiral HPLC** (Chiralcel OJ-H column, 10% EtOH/hexanes eluent, 2 μL injection, 1 mL/min flow rate, regulated at 20 °C, 230 nm): major enantiomer *t*<sub>R</sub> = 9.7 min, minor enantiomer *t*<sub>R</sub> = 12.6 min.

**Note:** Conversion of **1** was always complete, and thus only er/ee values were tabulated in Table 7.01.

### C. Tabulated ee vs. $\tau(i+2)$ Data<sup>44</sup>

**Table S8.01:** ee, er, and  $\Delta\Delta G^\ddagger$  as a Function of  $\tau(i+2)$

| <i>i</i> +2 Residue                       | Peptide Sequence                                         | $\tau(i+2)$ | Average $\tau(i+2)$ | major | minor | er   | ee (%) | log er | $\Delta\Delta G^\ddagger$ (kcal/mol) |
|-------------------------------------------|----------------------------------------------------------|-------------|---------------------|-------|-------|------|--------|--------|--------------------------------------|
| Acpc                                      | Boc-Dmaa-D-Pro-Acpc-Leu-NMe <sub>2</sub> ( <b>3a</b> )   | 118.1       |                     |       |       |      |        |        |                                      |
|                                           | Boc-Dmaa-D-Pro-Acpc-Leu-NMe <sub>2</sub> ( <b>3b</b> )   | 116.5       | 117.3               | 92.0  | 8.0   | 11.5 | 83.9   | 1.06   | 1.43                                 |
|                                           | Boc-Dmaa-D-Pro-Acpc-Leu-NMe <sub>2</sub> ( <b>3c</b> )   | 117.4       |                     |       |       |      |        |        |                                      |
|                                           | Boc-Dmaa-D-Pro-Acpc-Leu-OMe ( <b>4a</b> )                | 117.0       |                     |       |       |      |        |        |                                      |
|                                           | Boc-Dmaa-D-Pro-Acpc-Leu-OMe ( <b>4b</b> )                | 117.7       |                     |       |       |      |        |        |                                      |
|                                           | Boc-Dmaa-D-Pro-Acpc-Leu-OMe ( <b>4c</b> )                | 117.0       | 117.4               | 94.6  | 5.4   | 17.5 | 89.1   | 1.24   | 1.68                                 |
|                                           | Boc-Dmaa-D-Pro-Acpc-Leu-OMe ( <b>4d</b> )                | 117.3       |                     |       |       |      |        |        |                                      |
|                                           | Boc-Dmaa-D-Pro-Acpc-Leu-OMe ( <b>4e</b> )                | 118.0       |                     |       |       |      |        |        |                                      |
|                                           | Boc-Dmaa-D-Pro-Acpc-Gly-OMe ( <b>7a</b> )                | 117.0       |                     |       |       |      |        |        |                                      |
|                                           | Boc-Dmaa-D-Pro-Acpc-Gly-OMe ( <b>7b</b> )                | 115.7       | 116.4               | 88.9  | 11.1  | 8.0  | 77.7   | 0.90   | 1.22                                 |
|                                           | Boc-Dmaa-D-Pro-Acpc-Nle-NMe <sub>2</sub> ( <b>8</b> )    | 117.4       | 117.4               | 92.4  | 7.6   | 12.2 | 84.7   | 1.08   | 1.46                                 |
|                                           | Boc-Dmaa-D-Pro-Acpc-Val-NMe <sub>2</sub> ( <b>9</b> )    | 117.7       | 117.7               | 93.6  | 6.4   | 14.6 | 87.1   | 1.17   | 1.57                                 |
|                                           | Boc-Dmaa-D-Pro-Acpc-Val-OMe ( <b>10</b> )                | 117.2       | 117.2               | 90.9  | 9.1   | 10.0 | 81.8   | 1.00   | 1.35                                 |
|                                           | Boc-Dmaa-D-Pro-Acpc-Chg-NMe <sub>2</sub> ( <b>11</b> )   | 117.4       | 117.4               | 93.0  | 7.0   | 13.3 | 85.9   | 1.12   | 1.52                                 |
|                                           | Boc-Dmaa-D-Pro-Acpc-Phe-NMe <sub>2</sub> ( <b>12</b> )   | 116.9       | 116.9               | 88.1  | 11.9  | 7.4  | 76.1   | 0.87   | 1.17                                 |
| Boc-Dmaa-D-Pro-Acpc-Phe-OMe ( <b>13</b> ) | 116.9                                                    | 116.9       | 85.8                | 14.2  | 6.0   | 71.6 | 0.78   | 1.05   |                                      |
| Acbc                                      | Boc-Dmaa-D-Pro-Acbc-Leu-NMe <sub>2</sub> ( <b>16a</b> )  | 111.8       |                     |       |       |      |        |        |                                      |
|                                           | Boc-Dmaa-D-Pro-Acbc-Leu-NMe <sub>2</sub> ( <b>16b</b> )  | 114.4       | 112.9               | 85.0  | 15.0  | 5.7  | 70.0   | 0.75   | 1.02                                 |
|                                           | Boc-Dmaa-D-Pro-Acbc-Leu-NMe <sub>2</sub> ( <b>16c</b> )  | 112.5       |                     |       |       |      |        |        |                                      |
|                                           | Boc-Dmaa-D-Pro-Acbc-Leu-OMe ( <b>17a</b> )               | 112.3       | 112.3               | 82.9  | 17.1  | 4.8  | 65.7   | 0.69   | 0.93                                 |
| Aic                                       | Boc-Dmaa-D-Pro-Aic-Leu-OMe ( <b>19a</b> )                | 110.6       |                     |       |       |      |        |        |                                      |
|                                           | Boc-Dmaa-D-Pro-Aic-Leu-OMe ( <b>19b</b> )                | 104.5       | 107.6               | 60.9  | 39.1  | 1.6  | 21.3   | 0.19   | 0.26                                 |
| Cle                                       | Boc-Dmaa-D-Pro-Cle-Leu-OMe ( <b>18a</b> )                | 111.7       |                     |       |       |      |        |        |                                      |
|                                           | Boc-Dmaa-D-Pro-Cle-Leu-OMe ( <b>18b</b> )                | 111.3       | 111.5               | 70.1  | 29.9  | 2.3  | 40.1   | 0.37   | 0.50                                 |
| Achc                                      | Boc-Dmaa-D-Pro-Achc-Leu-OMe ( <b>22a</b> )               | 110.8       |                     |       |       |      |        |        |                                      |
|                                           | Boc-Dmaa-D-Pro-Achc-Leu-OMe ( <b>22b</b> )               | 109.8       | 110.3               | 68.1  | 31.9  | 2.1  | 36.2   | 0.33   | 0.44                                 |
| Aib                                       | Boc-Dmaa-D-Pro-Aib-Leu-NMe <sub>2</sub> ( <b>24</b> )    | 112.0       | 112.0               | 74.8  | 25.2  | 3.0  | 49.5   | 0.47   | 0.64                                 |
|                                           | Boc-Dmaa-D-Pro-Aib-Leu-OMe ( <b>25</b> )                 | 111.7       | 111.7               | 67.5  | 32.5  | 2.1  | 34.9   | 0.32   | 0.43                                 |
|                                           | Boc-Dmaa-D-Pro-Aib-Val-OMe ( <b>26</b> )                 | 112.0       | 112.0               | 67.8  | 32.2  | 2.1  | 35.6   | 0.32   | 0.44                                 |
|                                           | Boc-Dmaa-D-Pro-Aib-Phe-OMe ( <b>27</b> )                 | 111.0       | 111.0               | 65.8  | 34.2  | 1.9  | 31.5   | 0.28   | 0.38                                 |
|                                           | Boc-Dmaa-D-Pro-Aib-2-Thi-NMe <sub>2</sub> ( <b>29a</b> ) | 110.9       | 111.3               | 71.2  | 28.8  | 2.5  | 42.3   | 0.39   | 0.53                                 |
| Mono                                      | Boc-Dmaa-D-Pro-Ala-Phe-OMe ( <b>31</b> )                 | 111.8       | 111.8               | 71.7  | 28.3  | 2.5  | 43.3   | 0.40   | 0.54                                 |
|                                           | Boc-Dmaa-D-Pro-Gly-Leu-OMe ( <b>33a</b> )                | 115.7       |                     |       |       |      |        |        |                                      |
| Gly                                       | Boc-Dmaa-D-Pro-Gly-Leu-OMe ( <b>33a</b> )                | 115.7       |                     |       |       |      |        |        |                                      |
|                                           | Boc-Dmaa-D-Pro-Gly-Leu-OMe ( <b>33b</b> )                | 115.4       | 115.6               | 91.0  | 9.0   | 10.1 | 81.4   | 1.00   | 1.36                                 |

**Note:**  $\Delta\Delta G^\ddagger$  values were calculated using the following formula, where  $R = 1.99 \times 10^{-3}$  kcal/(mol\*K) and  $T = 298.15$  K:

$$-\Delta\Delta G^\ddagger = RT \ln(er)$$

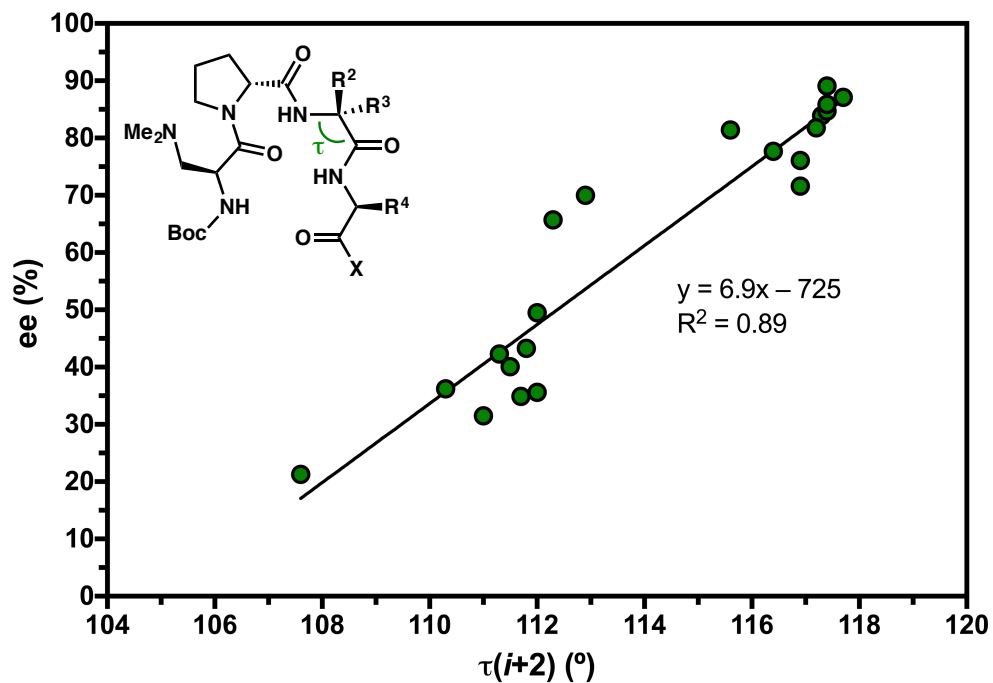

**Figure S8.01:** A plot of ee vs.  $\tau(i+2)$  reveals a linear correlation. This chart is reproduced from Figure 20 in the manuscript. Only peptides corresponding to the scheme provided (top right corner) in were considered for this analysis (Table S8.01).

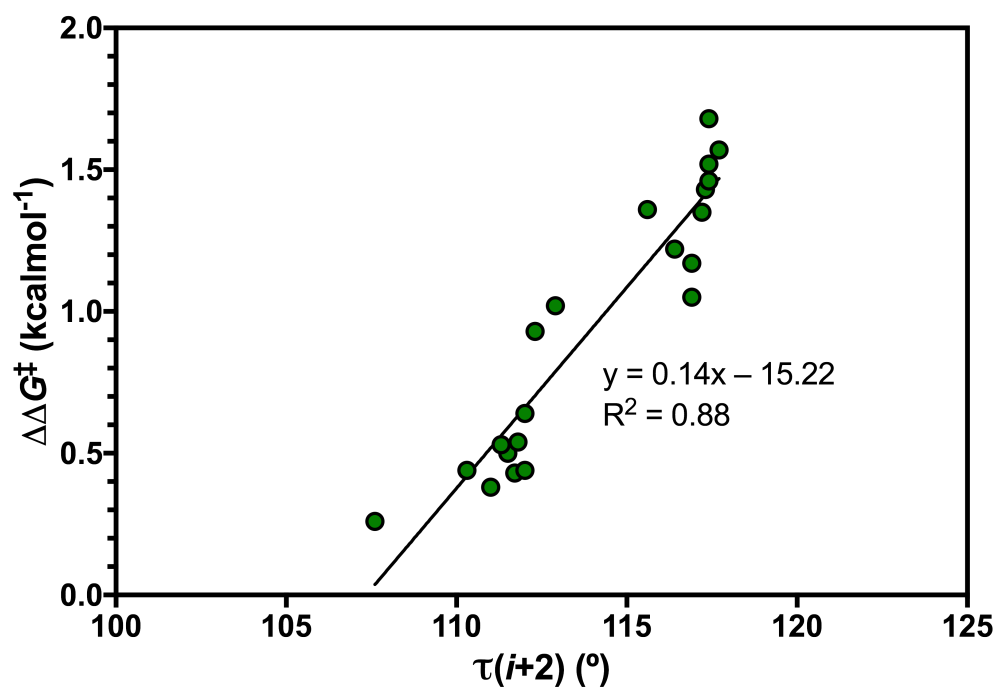

**Figure S8.02:** Plot of  $\Delta\Delta G^\ddagger$  vs.  $\tau(i+2)$ .

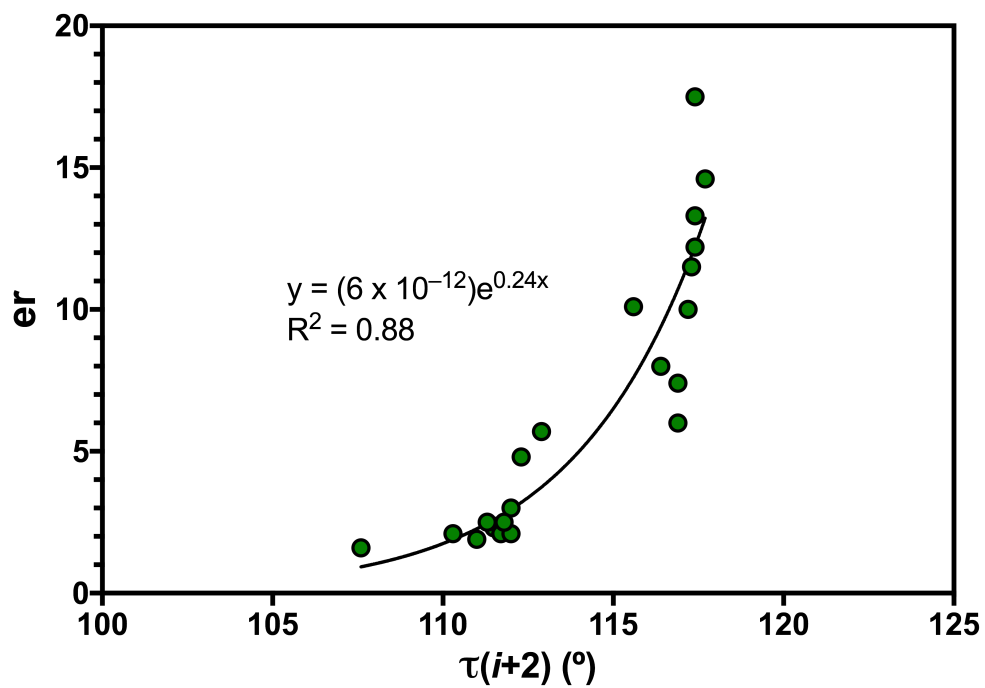

Figure S8.03: Plot of  $er$  vs.  $\tau(i+2)$ .

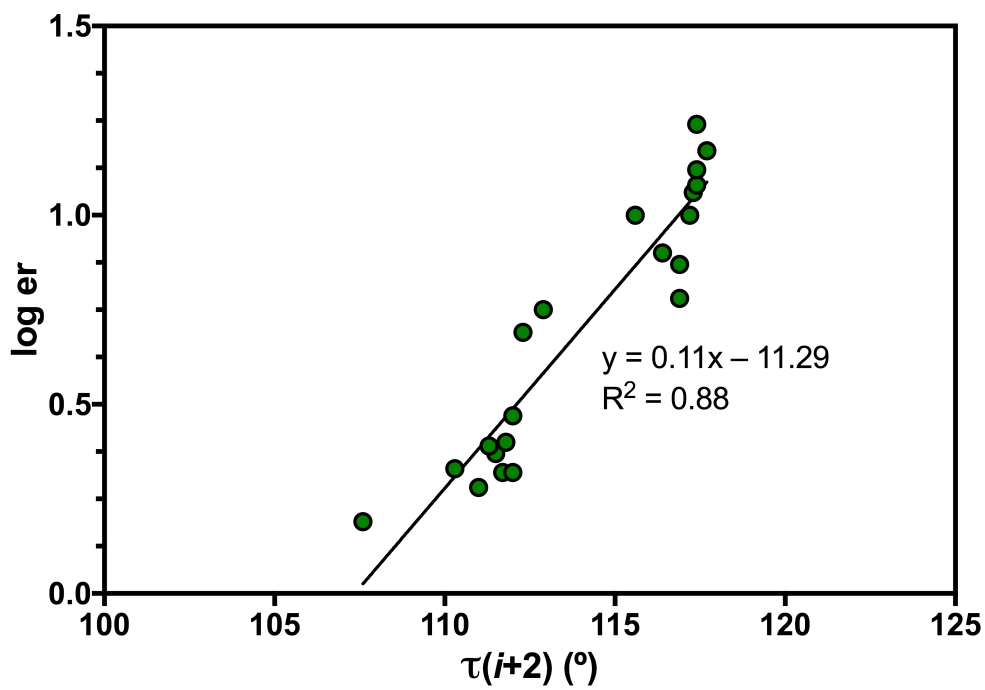

Figure S8.04: Plot of  $\log er$  vs.  $\tau(i+2)$ .

## IX. References

1. Fulmer, G. R.; Miller, A. J. M.; Sherden, N. H.; Gottlieb, H. E.; Nudelman, A.; Stoltz, B. M.; Bercaw, J. E.; Goldberg, K. I. *Organometallics* **2010**, *29*, 2176–2179.
2. (a) Montalbetti, C. A. G. N.; Falque, V. *Tetrahedron* **2005**, *61*, 10827–10852. (b) El-Faham, A.; Albericio, F. *Chem. Rev.* **2011**, *111*, 6557–6602.
3. Zhang, L.-H.; Kauffman, G. S.; Pesti, J. A.; Yin, J. *J. Org. Chem.* **1997**, *62*, 6918–6920.
4. Diener, M. E.; Metrano, A. J.; Kusano, S.; Miller, S. J. *J. Am. Chem. Soc.*, **2015**, *137*, 12369–12377.
5. Metrano, A. J.; Abascal, N. C.; Mercado, B. Q.; Paulson, E. K.; Miller, S. J. *Chem. Commun.* **2016**, *52*, 4816–4819.
6. Metrano, A. J.; Miller, S. J. *J. Org. Chem.* **2014**, *79*, 1542–1554.
7. Barrett, K. T.; Miller, S. J. *J. Am. Chem. Soc.* **2013**, *135*, 2963–2966.
8. Blank, J. T.; Miller, S. J. *Biopolymers (Pept. Sci.)* **2006**, *84*, 38–47.
9. Jarvo, E. R.; Copeland, G. T.; Papaioannou, N.; Bonitatebus, P. J.; Miller, S. J. *J. Am. Chem. Soc.* **1999**, *121*, 11638–11643.
10. Jakobsche, C. E.; Peris, G.; Miller, S. J. *Angew. Chem. Int. Ed.* **2008**, *47*, 6707–6711.
11. Blank, J. T.; Guerin, D. J.; Miller, S. J. *Org. Lett.* **2000**, *2*, 1247–1249.
12. CrystalClear and CrystalStructure, Rigaku/MSO, The Woodlands, TX, 2005.
13. APEX2 and SADABS, Bruker AXS Inc., Madison, WI, 2014.
14. Sheldrick, G. M. *Acta Crystallogr.* **2008**, *A64*, 112–122.
15. CYLview was used to render X-ray crystal data: CYLview, 1.0b; Legault, C. Y. L., Universite de Sherbrooke, 2009 (<http://www.cylview.org>).
16. Mercury CSD 3.8, Macrae, C. F.; Bruno, I. J.; Chisholm, J. A.; Edgington, P. R.; McCabe, P.; Pidcock, E.; Rodriguez-Monge, L.; Taylor, R.; van de Streek, J.; Wood, P. A. *J. Appl. Cryst.*, **2008**, *41*, 466–470.
17. Prism 7.0a, GraphPad Software, Inc., La Jolla, CA, 2016.
18. (a) Wilmot, C. M.; Thornton, J. M. *J. Mol. Biol.* **1988**, *203*, 221–232. (b) Hutchinson, E. G.; Thornton, J. M. *Protein Sci.* **1994**, *3*, 2207–2216.
19. Toniolo, C.; Benedetti, E. *Trends Biochem. Sci.* **1991**, *16*, 350–353.
20. Gunasekaran, K.; Ramakrishnan, C.; Balaram, P. *Protein Eng.* **1997**, *10*, 1131–1141.
21. Shoulders, M. D.; Kotch, F. W.; Choudhary, A.; Guzei, I. A.; Raines, R. T. *J. Am. Chem. Soc.* **2010**, *132*, 10857–10865.
22. (a) Zhou, A. Q.; O'Hern, C. S.; Regan, L. *Protein Sci.* **2011**, *20*, 1166–1171. (b) Sony Malathy, S. M.; Saraboji, K.; Sukumar, N.; Ponnuswamy, M. N. *Biophys. Chem.* **2005**, *120*, 24–31.
23. (a) Dunbrack, R. L.; Sapovalov, M. V. *Proteins: Struct., Funct., Bioinf.* **2011**, *66*, 279–303. (b) Zhou, A. Q.; O'Hern, C. S.; Regan, L. *Biophys. J.* **2012**, *102*, 2345–2352. (c) Zhou, A. Q.; Caballero, D.; O'Hern, C. S.; Regan, L. *Biophys. J.* **2013**, *105*, 2403–2411. (d) Caballero, D.; Smith, W. W.; O'Hern, C. S.; Regan, L. *Proteins: Struct., Funct., Bioinf.* **2015**, *83*, 1488–1499. (e) Caballero, D.; Virrueta, A.; O'Hern, C. S.; Regan, L. *Protein Eng. Des. Sel.* **2016**, *29*, 367–376.
24. (a) Steiner, T. *Angew. Chem. Int. Ed.* **2002**, *41*, 48–76. (b) Gellman, S. H.; Dado, G. P.; Liang, G.-B.; Adams, B. R. *J. Am. Chem. Soc.* **1991**, *113*, 1164–1173.
25. (a) Choudhary, A.; Gandla, D.; Krow, G. R.; Raines, R. T. *J. Am. Chem. Soc.* **2009**, *131*, 7244–7246. (b) Bartlett, G. J.; Choudhary, A.; Raines, R. T.; Woolfson, D. N.; *Nature Chem. Biol.* **2010**, *6*, 615–620. (c) Jakobsche, C. E.; Choudhary, A.; Miller, S. J.; Raines, R. T. *J. Am. Chem. Soc.* **2010**, *132*, 6651–6653. (d) Grünenfelder, C. E.; Kisunzu, J. K.; Trapp, N.; Kastl, R.; Wennemers,

- H. *Biopolymers (Pept. Sci.)* **2016**, ASAP, DOI: 10.1002/bip.22912. (e) Newberry, R. W.; Orke, S. J.; Raines, R. T. *Org. Lett.* **2016**, *18*, 3614–3617.
26. (a) MacArthur, M. W.; Thornton, J. M. *J. Mol. Biol.* **1996**, *264*, 1180–1195. For related examples, see: (b) Cruz-Cabeza, A. J.; Day, G. M.; Motherwell, W. D. S.; Jones, W. *Cryst. Growth Des.* **2006**, *6*, 1858–1866. (c) Alemán, C.; Jiménez, A. I.; Cativiela, C.; Pérez, J. J.; Casanovas, J. J. *Phys. Chem. B* **2005**, *109*, 11836–11841.
27. (a) Steiner, T. *Acta Crystallogr.* **2000**, *B56*, 673–676. (b) Nangia, A. *Acc. Chem. Res.* **2008**, *41*, 595–604. (c) Cruz-Cabeza, A. J.; Bernstein, J. *Chem. Rev.* **2013**, *114*, 2170–2191.
27. Jeener, J.; Meier, B. H.; Bachmann, P.; Ernst, R. R. *J. Chem. Phys.* **1979**, *71*, 4546–4553.
28. Borgia, B. A.; Gochin, M.; Kehrwood, D. J.; James, T. L. *Prog. NMR Spectrosc.*, **1990**, *22*, 83–100.
29. Macura, S.; Farmer, II, B. T.; Brown, L. R. *J. Mag. Res.*, **1986**, *70*, 493–499.
30. Stothard, P. *Biotechniques* **2000**, *28*, 1102–1104.
31. Wang, A. C.; Bax, A. *J. Am. Chem. Soc.* **1996**, *118*, 2483–2494.
32. Karplus, M. *J. Chem. Phys.* **1959**, *30*, 11–15.
33. Karplus, M. *J. Am. Chem. Soc.* **1963**, *85*, 2870–2871.
34. Online graphing software (<https://www.desmos.com/calculator/xjx15igpsf>).
35. Gaussian 09, Revision **D.01**, Frisch, M. J.; Trucks, G. W.; Schlegel, H. B.; Scuseria, G. E.; Robb, M. A.; Cheeseman, J. R.; Scalmani, G.; Barone, V.; Mennucci, B.; Petersson, G. A.; Nakatsuji, H.; Caricato, M.; Li, X.; Hratchian, H. P.; Izmaylov, A. F.; Bloino, J.; Zheng, G.; Sonnenberg, J. L.; Hada, M.; Ehara, M.; Toyota, K.; Fukuda, R.; Hasegawa, J.; Ishida, M.; Nakajima, T.; Honda, Y.; Kitao, O.; Nakai, H.; Vreven, T.; Montgomery, J. A., Jr.; Peralta, J. E.; Ogliaro, F.; Bearpark, M.; Heyd, J. J.; Brothers, E.; Kudin, K. N.; Staroverov, V. N.; Kobayashi, R.; Normand, J.; Raghavachari, K.; Rendell, A.; Burant, J. C.; Iyengar, S. S.; Tomasi, J.; Cossi, M.; Rega, N.; Millam, J. M.; Klene, M.; Knox, J. E.; Cross, J. B.; Bakken, V.; Adamo, C.; Jaramillo, J.; Gomperts, R.; Stratmann, R. E.; Yazyev, O.; Austin, A. J.; Cammi, R.; Pomelli, C.; Ochterski, J. W.; Martin, R. L.; Morokuma, K.; Zakrzewski, V. G.; Voth, G. A.; Salvador, P.; Dannenberg, J. J.; Dapprich, S.; Daniels, A. D.; Farkas, Ö.; Foresman, J. B.; Ortiz, J. V.; Cioslowski, J.; Fox, D. J. Gaussian, Inc., Wallingford CT, 2013.
36. All computational work was supported by the facilities and staff of Yale University Faculty of Arts and Sciences High Performance Computing Center, and by the National Science Foundation under grant number CNS 08-21132 that partially funded acquisition of the facilities.
37. GaussView 5.0, Gaussian, Inc., Wallingford, CT, 2008.
38. (a) J. A. Pople, J. A.; Gill, P. M. W.; Johnson, B. G. *Chem. Phys. Lett.* **1992**, *199*, 557–560. (b) Parr R. G.; Yang, W. *Density-Functional Theory of Atoms and Molecules*; Oxford University Press: Oxford, 1989.
39. Zhao, Y.; Truhlar, D. G. *Theor. Chem. Acc.* **2008**, *120*, 215–241.
40. Thompson, H. P. G.; Day, G. M. *Chem. Sci.* **2014**, *5*, 3173–3182.
41. (a) Grimme, S.; Antony, J.; Ehrlich, S.; Krieg, H. *J. Chem. Phys.*, **2010**, *132*, 154104–1–19. (b) S. Grimme, Ehrlich, S.; Goerigk, L. *J. Comp. Chem.* **2011**, *32*, 1456–1465.
42. Nagase, T.; Mizutani, T.; Ishikawa, S.; Sekino, E.; Sasaki, T.; Fujimura, T.; Ito, S.; Mitobe, Y.; Miyamoto, Y.; Yoshimoto, R.; Tanaka, T.; Ishihara, A.; Takenaga, N.; Tokita, S.; Fukami, T.; Sato, F. *J. Med. Chem.* **2008**, *51*, 4780–4789.
43. Ponomarev, I. I.; Razorenov, D. Y.; Petrovskii, P. V. *Russ. Chem. Bull.* **2009**, *58*, 2376–2384.
44. (a) Milo, A.; Bessm E. N.; Sigman, M. S. *Nature*, **2014**, *507*, 210–214. (b) Gustafson, J. L.; Sigman, M. S.; Miller, S. J. *Org. Lett.* **2010**, *12*, 2794–2797. (c) Sigman, M. S.; Harper, K. C.; Milo, A. *Acc. Chem. Res.* **2016**, *49*, 1292–1301.
